# Supplementary material for: CD169+ macrophages orchestrate plasmacytoid dendritic cell arrest and retention for optimal priming in the bone marrow of malaria-infected mice
Source: eLife. 2022 Oct 24;11:e78873. doi: 10.7554/eLife.78873 (PMC9648966; doi:10.7554/eLife.78873)
Supplement: Figure 1—figure supplement 2—source data 1. [file elife-78873-fig1-figsupp2-data1.xlsx]

## Sheet: 1D
% TAMRA-Red+ pDCs in BM
no transfer pDCs	iRBC pDCs
0.0156	0.0156
0.0551	0.0591
	0.0159
	0.0587
	0.043
	0
	0.124
	0.0627
	0

## Sheet: 1F
CD86 MFI gated on F480 hi MP		CD11a MFI gated on F480 hi MP		CD86 MFI gated on CD169 MP		CD11a MFI gated on CD169 MP
Naive	PyYM	Naive	PyYM	Naive	PyYM	Naive	PyYM
359	825	826	631	360	565	2858	1567
400	970	1546	934	361	564	3219	1733
346	806	1248	807	453	523	2892	2324
349	920	1472	859	434	817	2184	1371
	938		651		737		2010
