# Supplementary material for: CD169+ macrophages orchestrate plasmacytoid dendritic cell arrest and retention for optimal priming in the bone marrow of malaria-infected mice
Source: eLife. 2022 Oct 24;11:e78873. doi: 10.7554/eLife.78873 (PMC9648966; doi:10.7554/eLife.78873)
Supplement: Figure 1—source data 1. [file elife-78873-fig1-data1.xlsx]

## Sheet: 1A
% TAMRA-Red MP in BM
No Transfer F480hi	nRBC F480hi	iRBC F480hi	No transfer CD169hi	nRBC CD169hi	iRBC CD169hi
0.0699	0.223	7.96	0	0.045	1.99
0	0.281	4.91	0	0.0703	0.695
0	0.521	1.82	0	0.0155	0.817
0.0119	0.361	0.387	0	0	0.0812
0		0.407	0.0135	0.207	0.127
0		0.48	0	0.225	0.175
		2.23			0.167
		1.61			0.127
		2.44			0.15
		3.01			0.153
		4.56			0.457
		5.63			0.446
		3.72			0.982
		3.06
		3.49

## Sheet: 1C
% MP among singlet lin- cells
Time post infection (hours)	CD169hi								F4/80hi
0	3.03	3.02	3.67	4.29	4.03	5.58	3.77		1.19	1.12	1.87	1.66	2.69	3.01	2.62
24	4.16	4.3	3.13	4.59	4.83	4.7	4.67		1.91	1.85	2.11	1.71	2.41	2.56	2.26
30	4.29	3.59	4.84						2.79	2.09	2.31
36	1.69	1.91	2.28						0.88	1	0.85
	Numbers of macrophages
	in BM
Time post infection (hours)	CD169hi								F4/80hi
0	1206993	1197368	1521651	1824239	1337577	2149104	1787701		472960	444737	773988	706599	890900	1159202	1241728
24	1913107	1512549	1244990	1739917	1477655	1900954	1872075		879248	650146	838477	650500	738670	1035899	907170
30	1602215	1252973	1572817						1041667	727527	752276
36	529822	478724	619184						274024	250633	231753

## Sheet: 1E
	Time post infection (hours)	CD169hi							F4/80hi
MFI MHC II	0	712	767	685	539	535	534		290	330	282	384	384	349
	24	725	726	717	560	588	588		330	304	296	332	352	351
	30	623	590	619	568	539	565		305	254	295	333	334	360
	36	536	526	509	562	537	591		250	236	233	321	359	405
MFI ICAM-I	0	1723	1510	1526					2621	2269	2088
	24	1820	1658	1561					2726	2497	2475
	30	2008	1897	1789					3169	3096	3109
	36	2392	2520	2440					4703	5063	4752
MFI CD80	0	185	181	184	150	144	152		471	458	445	339	322	341
	24	183	179	181	138	150	149		503	485	490	321	324	318
	30	196	182	184	145	144	150		496	498	507	330	323	328
	36	257	252	230	153	140	149		821	846	758	328	301	346
MFI Sca 1	0	1.6	3.2	11.9					86	110	98.4
	24	12	9.4	7.4					99.5	103	102
	30	66	63.4	51					140	133	140
	36	156.5	159.2	163.9					231	233	221
