# Supplementary material for: CD169+ macrophages orchestrate plasmacytoid dendritic cell arrest and retention for optimal priming in the bone marrow of malaria-infected mice
Source: eLife. 2022 Oct 24;11:e78873. doi: 10.7554/eLife.78873 (PMC9648966; doi:10.7554/eLife.78873)
Supplement: Figure 2—figure supplement 1—source data 1. [file elife-78873-fig2-figsupp1-data1.xlsx]

## Sheet: 2B
NaiveWT 9-6-18 MP					WT36h 12-14-17 movie1_03 MP
Time (seconds)	Mean	SD	N		Time (seconds)	Mean	SD	N
0	0	0	1779		0	0	0	161
20	3.91157	6.94342	1779		20	4.21764	10.2919	161
40	5.31407	10.7614	1064		40	6.42729	16.3365	173
55	5.33236	12.1307	710		60	7.85387	18.6436	59
75	6.12915	14.6917	550		80	8.92085	21.173	53
95	6.18836	12.9396	436		100	4.92457	10.282	47
115	6.09815	11.4338	367		120	10.0611	28.1468	87
135	5.79832	9.69357	308		140	9.44233	18.4725	40
150	5.98329	10.5344	265		160	5.35611	9.40298	37
170	6.35637	10.4565	235		180	7.26146	13.7308	36
190	6.43779	11.1799	209		200	6.6596	10.0834	70
210	5.8964	10.4548	196		220	7.23394	12.2084	34
230	6.64457	10.9952	181		240	6.58088	12.4838	33
245	6.74973	11.9641	156		260	6.26539	10.6836	33
265	7.62795	15.2753	144		280	5.37594	8.79207	65
285	7.53366	14.2758	135		300	9.34306	16.1405	32
305	8.38813	17.0734	133		320	7.22713	9.37718	31
325	7.88365	17.6134	124		340	8.21603	13.2338	31
340	9.10191	18.4518	116		360	6.73432	10.1973	60
360	9.66359	18.6208	110		380	7.74833	13.3195	30
380	9.60878	20.867	109		400	6.52797	6.5406	30
400	8.74668	19.1464	104		420	9.40917	14.285	30
420	10.3275	20.4167	96		440	10.1922	15.0062	60
435	10.7916	21.9906	93		460	10.2683	15.2943	29
455	10.1878	20.8538	90		480	11.1403	16.7305	29
475	10.0623	20.5288	89		500	9.32986	10.3823	28
495	10.4988	21.8253	86		520	10.3674	15.7234	56
515	13.5331	25.2025	82		540	11.3127	14.7338	28
530	14.5866	28.9656	80		560	11.3901	17.9821	28
550	13.7832	26.7109	76		580	11.6221	16.0142	28
570	14.1071	26.8952	76		600	8.92718	9.67007	56
590	15.1322	29.6742	73		620	10.6466	16.899	28
610	15.0182	28.7159	72		640	9.40681	17.4175	27
625	14.5486	28.9853	70		660	8.33648	9.55269	27
645	13.2048	27.0953	69		680	8.98051	9.23341	52
665	15.2224	29.4406	69		700	9.93265	10.3167	26
685	14.4651	28.0967	67		720	8.94615	15.9404	26
705	15.4521	30.6319	66		740	10.3392	16.2842	26
720	15.0988	32.3262	65		760	11.5759	14.9601	52
740	14.4938	28.6548	65		780	12.0239	16.8298	26
760	16.3797	34.4962	63		800	9.78615	16.0919	26
780	13.8869	28.4295	60		820	10.5458	16.0507	26
800	15.7297	34.0355	58		840	10.7892	14.2903	52
815	14.765	32.345	57		860	9.13412	17.6304	26
835	15.7451	31.5326	53		880	9.2226	21.3751	25
855	15.4664	34.7577	51		900	7.2518	8.64167	25
875	13.5367	33.735	50		920	7.40494	8.23421	50
895	14.6826	33.8663	50		940	13.3482	19.1366	24
910	14.5986	33.4279	48		960	11.9089	17.1192	22
930	16.4001	33.9452	47		980	7.75643	8.68099	21
950	16.6175	35.3174	45		1000	5.3105	5.42254	40
970	20.2534	39.241	44		1020	5.35485	5.57977	20
990	22.144	42.3084	43		1040	3.97363	4.24365	19
1005	16.1101	36.002	41		1060	5.68995	5.89188	19
1025	18.1666	39.7638	41		1080	4.97044	3.34026	36
1045	19.6072	42.3972	39		1100	5.53611	4.83497	18
1065	17.0833	38.4815	39		1120	6.61761	4.61297	18
1080	10.294	8.52797	5		1140	4.52753	3.92908	17
1085	19.5232	41.6678	34		1160	3.72526	3.84809	34
1100	18.6258	39.0054	38		1180	2.51919	2.11489	16
1120	20.9424	42.6401	38		1200	7.05237	7.86026	16
1140	13.2056	12.1367	37		1220	6.93213	10.9283	16
1160	12.9994	11.514	36		1240	5.58071	8.87958	31
1175	14.3956	12.8674	34		1260	5.5314	6.56461	15
1195	12.3521	8.48063	34		1280	5.64933	6.46271	15
1215	12.7094	7.80433	34		1300	7.53927	11.0856	15
1235	13.2768	9.16926	33		1320	4.94013	6.18323	30
1255	13.3448	9.26117	33		1340	4.74373	7.72473	15
1270	12.2722	7.71515	32		1360	4.85064	5.43151	14
1290	13.751	10.332	31		1380	7.295	10.5749	13
1310	13.35	8.27342	31		1400	6.63817	8.29182	24
1330	12.8159	9.04609	29		1420	4.47545	4.92405	11
1350	13.7776	10.402	29		1440	6.533	6.20366	10
1365	13.6668	9.42406	28		1460	7.09556	8.94237	9
1385	13.9004	10.8068	28		1480	8.81875	9.54963	16
1405	17.7656	13.0021	27		1500	9.5025	5.99959	8
1425	15.7712	12.605	26		1520	10.9887	10.4298	8
1445	15.1465	12.6267	26		1540	10.2137	10.9603	8
1460	14.2562	16.4923	26		1560	14.7292	13.7721	13
1480	14.5465	16.6824	26
1500	14.0588	15.0708	25
1520	13.2344	13.3226	25
1540	14.4876	14.1845	25
1555	13.4888	12.3243	25
1575	15.2272	11.688	25
1595	15.7892	15.7027	25
1615	13.7216	10.5518	25
1635	14.2714	12.36	22
1650	14.5086	10.7918	22
1670	17.6395	20.3451	22
1690	19.2277	20.265	22
1710	16.8243	12.3038	21
1730	15.4825	12.902	20
1745	15.36	12.4812	20
1765	16.634	12.8459	20
1785	19.2845	16.4253	20
1805	19.8195	16.203	20
1825	17.119	12.7852	20
1840	20.339	16.5571	20
1860	19.2845	16.9314	20
1880	19.0153	16.582	19
1900	21.0876	18.7796	17
1920	21.3182	18.3609	17
1935	19.1969	16.3806	16
1955	20.03	14.6977	16
1975	18.5681	12.4263	16
1995	21.6825	12.3816	16
2015	23.6987	13.0525	15
2030	21.0953	13.9373	15
2050	22.3167	14.7448	15
2070	22.5747	17.3799	15
2090	22.476	13.8408	15
2110	25.8987	16.1272	15
2125	24.8547	17.3893	15
2145	25.1873	17.7476	15
2165	23.9767	19.9428	15
2185	23.6353	18.78	15
2205	24.1213	20.8797	15
2220	24.1573	18.7902	15
2240	25.2833	20.2932	15
2260	24.302	22.8397	15
2280	24.6153	24.3433	15
2300	24.2153	23.8503	15
2315	27.988	26.8746	15
2335	25.4493	25.6353	15
2355	24.518	22.4623	15
2375	25.7293	20.2375	15
2395	28.4633	21.8389	15
2410	28.0533	22.4738	15
2430	29.5493	22.0658	15
2450	24.1771	13.9482	14
2470	24.3207	16.3264	14
2490	23.8771	12.4928	14
2505	24.8079	12.5453	14
2525	26.2779	12.601	14
2545	26.76	14.2446	13
2565	26.39	15.7335	12
2585	26.335	16.2061	12
2600	25.39	17.1575	12
2620	24.795	16.6142	12
2640	25.0483	17.6022	12
2660	25.6317	18.3811	12
2680	26.4855	20.811	11
2695	26.2709	20.1566	11
2715	29.8827	21.3711	11
2735	28.4091	21.2809	11
2755	28.3545	22.9076	11
2775	28.2591	21.2671	11
2790	28.1645	16.7098	11
2810	29.8736	14.6608	11
2830	32.217	14.1812	10
2850	33.809	15.3477	10
2870	32.601	15.1108	10
2885	31.598	14.6788	10
2905	30.508	13.6279	10
2925	30.758	17.4513	10
2945	29.846	15.5136	10
2965	32.358	15.8314	10

## Sheet: 2C
	Number of MP per leg in BM						% of MP among CD3/CD19/NK1.1neg cells in BM
CD169 DTR						CD169 DTR
F4/80hi		CD169hi				F4/80hi		CD169hi
No DT	DT	No DT	DT			No DT	DT	No DT	DT
742579	77853.9	2115789	245796			2.42	0.16	7.48	1.17
859940	37760.9	2926912	326646			2.31	0.12	10.6	1.18
778718	82131.4	1044460	298005			1.75	0.12	4.01	1.1
1047919	107413	1432004	323518			2.11	0.15	5.52	1.26
861912	112279	1498072	211765			3.7	0.53	4.39	0.34
1072443	234916	1997941	207933			3.13	0.85	5.35	0.39
	229476	1215904	172093			4.12	0.84	3.05	0.88
	140136		191324				0.54		0.5
