# Supplementary material for: CD169+ macrophages orchestrate plasmacytoid dendritic cell arrest and retention for optimal priming in the bone marrow of malaria-infected mice
Source: eLife. 2022 Oct 24;11:e78873. doi: 10.7554/eLife.78873 (PMC9648966; doi:10.7554/eLife.78873)
Supplement: Figure 2—source data 1. [file elife-78873-fig2-data1.xlsx]

## Sheet: 2A
Uninfected WT PTCRA-EGFP					Py YM-infected, 36 hrs WT PTCRA-EGFP
Track ID	Centroid X (µm)	Centroid Y (µm)	Centroid Z (µm)		Track ID	Centroid X (µm)	Centroid Y (µm)	Centroid Z (µm)
158	26.87	206.84	6.22		126	0.827	11.79	16.67
158	25.78	206.27	5.77		126	1.14	12.26	15.89
158	24.53	209.43	6.02		126	1.53	12.45	16.1
158	25.69	205.77	6.46		126	1.59	12.36	15.47
158	25.06	205.99	6.74		126	1.55	13.03	17.75
158	24.7	206.16	6.39		126	1.61	13.43	16.4
158	24.65	204.65	6.48		126	1.73	13.13	16.3
158	24.5	203.8	6.82		126	1.7	13.52	17.61
158	23.6	207.87	7.49		126	2.31	14.18	16.99
158	25.65	203.75	8.2		126	2.18	14.48	16.68
158	25.56	203.11	7.27		126	2.72	14.64	17.45
158	25.88	202.17	7.24		126	2.36	14.76	16.6
158	26.76	199.55	7.26		126	1.88	14.39	17.42
158	26.8	199.21	8.66		126	2.13	15.59	16.46
158	26.23	199.82	7.63		126	1.87	14.98	16.48
158	26.33	200.55	7.02		126	2.15	16.42	16.87
158	26.22	200.77	6.91		126	1.88	15.6	16.57
158	26.21	200.19	6.47		126	2.58	15.33	16.83
158	26.11	200.34	5.92		126	1.58	15.18	16.78
158	26.13	199.65	6.46		126	1.93	14.87	15.82
158	25.87	200.16	5.72		126	1.73	15.46	16.43
158	25.65	200.05	6.76		126	2.17	16.1	14.3
158	25.14	200	7.11		126	2.61	16.57	14.85
158	24.94	200.34	6.89		126	3.32	16.99	14.95
158	24.52	201.13	8		126	4.09	17.36	14.79
158	24.18	201.05	7.05		126	4.03	18.01	13.56
158	24.14	201.08	7.24		126	3.98	17.99	13.64
158	23.53	201.87	7.15		126	3.85	18.83	13.93
158	22.95	202.41	7.59		126	4.43	19.39	13.82
158	22.47	202.56	8.48		126	4.61	19.39	13.47
158	23.03	201.07	7.89		126	4.6	20.15	13.14
158	23.38	200.44	9.18		126	4.47	19.97	13.64
158	23.63	200.92	8.64		126	4.44	20.12	12.8
158	23.04	201.59	9.68		126	4.74	21.21	12.42
158	23.32	201.23	8.58		126	5.49	20.93	13.04
158	23.14	200.96	8.27		126	5.32	21.56	12.61
158	22.61	201.61	8.48		126	6.32	22.38	9.21
158	22.84	201.66	8.1		126	5.89	22.59	10.17
158	22.36	201.2	8.02		126	5.95	22.78	8.27
158	21.83	201.8	7.39		126	6.18	22.83	6.25
158	22.02	201.75	7.67		126	5.76	22.53	6.3
158	20.6	203.15	6.62		126	7.27	23.18	5.26
158	20.56	202.62	5.92		126	6.95	22.69	5.22
158	18.78	204.02	5.7		126	7.12	23.06	5.39
158	18.77	203.89	6.56		126	6.77	23.56	4.79
158	19.18	203.04	6.88		126	7.02	23.47	4.6
158	19.69	202.61	5.05		126	6.77	23.82	4.65
158	19.2	203.07	7.4		126	7.22	23.93	4.73
158	19.22	202.88	6.39		126	7.66	23.44	4.73
158	17.81	204.49	6.11		126	8.29	23.71	4.36
158	18.11	203.64	7.01		126	7.93	23.67	4.46
158	19.44	202.12	7.64		126	8.48	24.05	4.7
158	19.54	201.63	6.4		175	57.01	2.58	17.53
158	19.25	201.59	7.37		175	58.04	2.55	18.98
158	18.49	202.92	7.53		175	56.69	3.02	16.77
158	17.35	203.78	7.65		175	58.37	2.13	20.45
158	19.34	202.37	7.51		175	59.33	1.48	18.67
158	19.27	202.57	8.45		175	58.51	1.49	18.5
158	19.73	201.73	7.89		175	58.2	1.65	18.55
158	19.31	201.47	7.36		175	58.25	1.78	17.61
158	18.71	201.94	6.71		175	59.47	1.17	18.55
158	18.73	202.1	6.43		175	57.14	2.42	16.63
158	19.25	201.96	6.2		175	59.35	2.04	17.76
158	19.66	201.62	6.77		175	60.54	1.79	19.5
158	19.52	201.8	6.41		175	57.8	2.05	14.41
158	18.94	202.04	5.15		175	58.65	2.51	17.36
158	17.42	203.33	6.69		175	58.77	3.35	16.13
158	17.13	202.82	5.56		175	58.55	5.38	16.53
158	16.42	203.51	5.4		175	58.91	3.66	15.45
158	16.43	203.96	6.29		175	58.22	3.72	13.57
158	16.69	203.27	6.06		175	59.49	3.48	15.02
158	16.37	203.88	6.14		175	59.71	4.47	15.7
158	14.34	205.47	6.69		175	61.07	3.01	14.22
158	14.11	204.95	6.4		175	60.03	5.01	15.13
158	15.72	203.76	6.55		175	60.24	4.4	15.71
158	16.88	202.82	7.67		175	59.65	5.49	15.55
158	17.41	202.17	7.64		175	61.08	4.9	16.69
158	18.65	202.07	7.6		175	59.88	5.28	14.56
158	18.79	202.32	7.9		175	60.58	4.36	15.23
158	17.43	204.02	7.22		175	59.93	5.37	14
158	15.59	204.54	7.81		175	60.8	4.45	14.27
158	15.04	205.17	7.58		175	60.23	6.13	13.9
158	16.39	203.29	8.11		175	60.12	6.49	13.94
158	17.67	202.23	8.82		175	61.23	5.72	13.71
158	17.39	202.3	8.76		175	61.23	5.62	11.66
158	19.31	200.74	9.84		175	61.12	6.08	11.69
158	18.56	202.42	7		175	61.33	5.28	9.01
158	17.87	202.95	8.53		175	62.74	4.51	12.05
158	16.13	203.6	8.6		175	62.58	4.06	9.72
158	15.67	204.6	6.15		175	61.66	5.76	9.4
158	16.41	203.22	6.22		175	61.89	6.72	8.13
158	16.57	203.32	6.12		175	63.02	5.06	10.65
158	18.3	203.12	7.37		175	61.93	5.65	9.23
158	18.31	203.58	7.14		175	61.63	7.17	7.1
158	17.91	203.16	7.4		175	62.95	4.79	9.58
158	18.24	202.76	6.64		175	63.04	5.4	8.98
158	18.5	203.27	7.58		175	62.95	4.88	9.17
158	16.65	204.26	7.54		175	61.56	5.87	8.06
158	17.12	203.51	7.41		175	62.58	4.69	9.65
158	18.72	202.87	7.36		175	62.51	6.64	8.71
158	19.7	202.23	7.93		186	150.35	245.73	17.29
158	19.95	202.37	9.07		186	147.57	246.18	17.85
158	18.84	203.16	7.9		186	144.81	244.33	16.72
158	19.46	203.46	7.33		186	143.85	243.65	18.6
158	17.22	203.38	5.61		186	142.39	242.34	18.35
158	16.06	203.68	6.38		186	141.16	242.05	19.22
158	15.14	203.91	6.35		186	140.89	241.41	19.09
158	14.82	204.18	5.61		186	140.3	240.8	18.77
158	13.61	204.53	5.49		186	139.03	237.96	19.52
158	13.51	204.47	5.39		186	139.1	238.13	22.06
158	13.45	204.03	6.96		191	83.84	211.63	3.47
158	12.65	203.95	5.48		191	82.4	210.9	3.3
158	13.67	203.31	5.63		191	81.62	211.05	2.58
158	14.19	203.04	6.09		191	83.68	211.25	3.29
158	14.21	203.26	7.31		196	104.77	192.48	3.7
158	14.29	202.69	5.79		196	105.76	188.02	3.73
158	14.48	203.3	6.08		196	107.23	188.47	2
158	15.52	203.16	7.09		196	103.85	188.31	2.81
158	15.92	203.14	6.31		199	239.07	177.82	4.95
158	14.37	203.74	6.37		199	238.35	177.62	5.45
158	13.23	203.54	6.92		202	10.71	49.3	17.07
158	11.55	204.45	6.43		202	9.54	48.29	16.37
158	12.36	204.49	7.87		205	138.66	227.95	16.49
158	11.59	205.09	8.1		205	139.21	227.9	18.83
158	12.38	204.63	6.3		208	140.3	128.83	10.56
158	13.38	204.2	6.28		208	139.18	128.04	11.8
158	13.34	204.29	5.63		212	110.86	229.77	10.43
158	12.75	204.65	5.17		212	111.39	229.76	9.91
158	11.8	204.76	6.74		212	112.31	229.78	7.76
158	12.62	204.21	6.81		215	174.5	197.7	18.07
158	11.97	204.74	5.28		215	175.29	197.9	17.74
158	13.05	204.38	6.64		218	48.13	111.04	2.28
158	12.82	204.52	6.33		218	48.24	110.76	1.27
158	13.15	204.38	5.79		223	36.52	146.31	13.98
158	14.12	204.06	5.71		223	34.94	146.54	13.21
158	15.26	203.49	5.14		223	36.42	147.6	13.52
158	14.61	203.42	5.78		223	34.65	145.79	14.88
158	14.19	203.53	5.6		226	161.17	208.8	32.31
158	14.41	203.36	5.96		226	159.36	208.27	31.16
158	14.79	203.67	6.49		266	70.78	201.2	9.25
158	15.57	203.59	5.85		266	73.73	202.61	7.4
158	16.64	203.05	6.81		266	73.26	202.38	8.17
158	15.45	203.09	7.58		266	73.38	203.3	8.45
158	13.89	203.39	7.22		266	73.35	203.51	7.85
158	13.82	203.5	6.83		266	73.49	202.24	8.67
158	13.48	203.33	7.28		266	73.07	201.75	9.29
158	13.07	203.71	6.85		266	72.76	201.73	9.5
158	12.27	204.34	6.55		266	72.05	201.81	8.92
158	11.8	203.96	6.5		266	72.49	201.61	7.87
158	11.02	204.12	5.91		266	72.52	201.19	10.2
158	10.38	204.24	4.55		266	73.15	202.52	6.57
158	11.61	203.42	6		266	74.02	202.85	7.73
158	12.62	203.5	4.89		266	74.51	202.14	8.53
158	14.3	203.21	5.88		266	75.52	202.85	8.87
158	15.55	203.18	6.13		266	75.27	202.88	7.74
158	14.61	203.35	5.45		266	75.16	204.51	7.1
158	14.66	203.29	6.16		266	75.17	203.13	8.86
316	231.49	211.71	11.62		266	75.17	203.34	9.39
316	229.95	211.32	11.25		266	74.68	203.71	9.25
316	230.05	211.49	10.24		266	74.98	204.68	8.4
316	228.86	211.18	11.93		266	74.13	204.11	8.97
316	228.64	210.51	14.74		266	72.91	204.78	8.3
316	228.32	209.85	14.64		266	72.87	204.94	8.45
316	228.55	209.05	12.59		266	73.11	205.91	9.05
316	228.1	209.45	16.25		266	73.61	206.61	8.75
316	228.23	209.89	15.25		266	73.95	206.67	7.89
316	228.3	210.26	14.1		266	75.04	208.13	7.98
316	228.64	210.11	13.89		266	74	209.66	5.26
316	228.71	211.61	13.73		266	74.69	209.28	4.78
316	228.29	210.97	14.17		266	74.82	209.11	2.29
316	227.55	210.63	14.05		266	74.91	208.97	3.09
316	228.19	211	12.53		266	75.43	210.24	2.43
316	227.57	211.73	14.13		266	76.41	210.7	2.3
316	226.74	211.23	14.92		266	76.83	210.31	3.38
316	227.06	210.63	14.02		266	77.31	210.03	2.36
316	226.64	209.77	13.16		266	77.99	210.06	3.51
316	225.21	210.18	12.76		266	77.17	209.64	2.2
316	225.36	210.92	13.27		266	79.13	209.67	3.38
316	226.37	210.73	13.39		269	10.97	49.1	16.52
316	226.01	209.6	13.06		269	11.36	48.98	16.26
316	226.95	209.46	13.31		272	137.92	227.28	16.49
316	226.5	209.58	15.44		272	137.88	228.76	16.77
316	225.66	208.15	14.21		275	104.47	119.21	5.15
316	226.24	209.38	13.73		275	105.1	118.25	4.95
316	226.08	208.71	15.08		278	239.31	177.94	4.21
316	225.21	207.48	14.1		278	236.52	176.75	6.22
316	225.06	206.99	14.67		283	109.97	163.5	19.35
316	225.37	207.37	13.97		283	109.38	162.94	18.07
316	225.17	207.09	15.49		283	110.22	163.41	16.71
316	225.24	208.02	14.17		283	110.05	163.29	16.36
316	224.7	207.49	15.47		286	161.27	210.07	31.79
316	224.01	205.9	15.36		286	162.44	208.48	29.64
316	223.52	205.27	15.17		293	11.88	48.76	15.8
316	222.96	204.44	12.63		293	12.5	49.33	16.02
316	224	204.53	11.35		293	12.31	49.27	16.68
316	224.94	205.25	9.87		293	11.68	48.4	15.3
316	224.74	205.63	9.81		293	13.5	49.67	16.43
316	225.15	205.55	10.53		293	11.92	48.12	14.37
316	225.77	205.77	10.08		298	135.67	226.27	18.38
316	226.39	206.62	7.74		298	137.4	227.57	17.18
316	227.13	206.44	8.42		298	136.94	226.33	16.59
316	227.09	206.39	7.83		298	137.28	225.57	15.81
316	227.03	206.14	8.37		303	104.36	193.8	5.59
316	228.15	206.39	8.03		303	105.44	192.43	3.83
316	228.38	206.74	7.75		303	104.23	188.43	3.97
316	228	206.57	7.84		303	107.07	188.34	2.57
316	229.77	207.02	8.07		310	28.98	145.4	14.49
316	229.71	206.55	7.85		310	30.52	145.96	14.18
316	230.61	205.98	8.58		310	30.96	146.41	11.41
316	231.06	205.69	7.99		310	34.33	145.72	11.98
316	232.15	205.82	9		310	32.35	146.19	12.39
316	233.41	206.48	8.72		310	35.86	146.74	12.46
316	234.18	206.92	9.05		315	137.77	128.4	13.31
316	235.25	206.92	9.57		315	137.34	129.59	11.91
316	235.11	206.68	9.07		315	139.53	130.4	12.07
316	234.92	206.62	9.3		315	137.12	129.54	11.33
316	234.51	205.96	9.2		318	160.49	210.46	33.29
316	234.51	205.3	8.42		318	159.05	210.83	33.76
316	235.03	205.04	8.35		326	149.48	251.29	22.95
316	235.38	205.24	8.06		326	149.23	250.97	21.93
316	235.16	205.36	7.36		326	149.55	251.21	18.5
316	234.94	205.79	7.22		326	148.82	250.93	19.93
316	234.8	205.18	6.36		326	149.18	250.4	17.63
316	234.84	204.24	6.81		326	149.08	250.51	17.29
316	234.58	203.79	8.27		326	148.43	251.08	17.87
316	234.94	202.86	6.99		329	58.91	9.11	7.99
316	235.41	203.35	9.07		329	58.69	6.74	5.98
316	234.73	201.56	7.86		346	135.27	225.27	25.1
316	233.87	201.64	7		346	135.04	225.4	25.99
316	233.9	200.65	8.44		346	133.94	224.91	26.63
316	233.84	200.4	7.55		346	135.84	224.94	26.47
316	233.74	201.13	8.01		346	135.31	224.79	25.98
316	233.4	201.45	9.23		346	135.54	225.92	25.16
316	233.22	201.65	8.46		346	135.65	225.81	25.66
316	233.04	202.14	10.03		346	135.33	225.46	25.15
316	231.73	202.31	11.1		346	135.35	224.92	24.95
316	232.47	201.94	9.96		346	135.71	225.3	24.67
316	231.06	203.24	10.33		346	135.85	225.91	24.11
316	234.04	203.2	9.04		346	135.56	226.06	22.73
316	234.18	202.5	8.56		346	135.67	226.6	21.95
316	234.46	202.27	7.95		346	135.55	226.88	21.81
316	234.96	203.26	7.28		346	136.41	227.11	19.15
316	235.57	203.87	9.04		346	135.8	226.13	17.44
316	235.15	204.12	8.62		349	105.86	193.07	8.04
316	234.14	202.72	8.44		349	104.92	192.45	4.25
316	233.17	201.84	8.1		353	137.41	128.36	18.6
316	233.21	201.69	8.16		353	137.57	128.28	17.71
316	232.63	200.96	8.22		353	137.72	129.5	14.73
316	231.74	201.01	8.7		358	13.23	47.32	22.64
316	231.43	200.95	8.55		358	12.24	47.33	20.81
316	231.84	201.31	7.72		358	12.74	48.41	21.03
316	232.16	201.9	8.44		358	12.18	47.3	19.93
316	232.57	201.93	8.57		363	90.67	83.09	11.69
316	230.91	200.98	8.65		363	90.75	84.38	11.2
316	231.29	200.53	9		363	89.82	83.77	11.62
316	231.23	199.81	10.23		363	91.41	83.6	10.29
316	231.49	200	9.85		366	130.1	155.22	11.3
316	231.8	200.27	10.71		366	131.41	154.26	12.96
316	232.85	201.18	10.37		405	83.99	138.21	5.16
316	232.27	201.29	8.57		405	83.84	138.55	4.27
316	232.38	201.16	8.27		405	84.48	140.21	4.25
316	231.57	200.55	7.74		405	84.43	141.06	2.73
316	231.89	199.8	7.3		405	84.15	142.16	3.7
316	232.16	200.21	8.08		405	85.14	143.98	2.83
316	231.88	200.44	6.85		405	85.14	144.67	2.74
316	233.07	199.81	7.25		405	84.65	145.44	3.46
316	233.61	199.83	7.49		405	85.26	145.75	2.01
316	233.24	200.4	6.73		405	85.81	146.42	1.62
316	232.17	200.23	7.4		405	85.32	145.96	2.16
316	232.02	200.33	7.29		405	85.27	146.07	2.47
316	232.88	200.35	7.2		405	85.47	145.92	2.73
316	233.74	200.48	7.57		405	85.67	146.36	2.7
316	233.86	201.48	8.38		405	84.81	146.66	2.7
316	235.03	200.91	9.61		405	85.69	146.51	2.5
316	234.59	198.66	9.04		405	85.14	146.62	3.29
316	234.26	196.81	9.35		405	85.84	147.3	3.56
316	233.22	194.09	9.54		405	86.41	148.69	4.06
316	233.8	193.6	9.7		405	86.37	148.39	3.12
316	233.21	194.22	10.17		405	86.17	148.59	3.73
316	232.88	193.97	10.2		405	86.07	149	3.24
316	232.28	194.06	9.5		405	85.7	148.53	3.37
316	232.2	193.91	9.47		405	85.36	148.8	4.13
316	231.62	192.45	7.99		405	85.3	149.11	4.81
316	232.42	193.69	8.18		405	85.12	149.19	3.18
316	233.56	196.12	8.38		405	85.78	149.78	4.1
316	234.34	199.15	8.17		405	85.58	150.34	4.71
316	234.18	200.24	7.9		405	85.71	151.32	4.86
316	234.02	199.72	10.01		405	84.82	150.97	3.51
316	234.24	200.23	9.01		405	85.7	151.25	5.25
316	234.18	202.62	8.49		405	86.07	152.23	3.59
316	233.57	201.45	7.91		405	85.8	152.56	3.54
316	233.32	199.77	7.2		405	86.42	151.85	3.12
316	232.94	198.97	8.57		405	86.81	151.83	3.39
316	232.92	200.61	8.58		405	87.08	151.66	3.63
316	233.54	199.79	8.97		405	87.93	153.34	2.2
316	233.67	199.2	8.71		405	87.32	150.93	2.28
316	233.54	200.13	7.81		465	23.08	137.44	33.24
316	233.89	200.85	7.77		465	23.01	137.02	33.03
316	233.75	199.35	8.81		465	22.49	137.32	31.14
316	232.9	196.97	10.01		465	22.06	137.92	30.77
316	232.51	193.43	10.82		465	21.9	137.18	27.12
316	231.58	190.55	10.72		465	22.55	137.56	25.93
316	231.34	190.39	11.66		465	21.86	137.82	26.38
316	231.25	189.93	9.25		465	21.72	137.89	26.75
316	231.84	190.65	8.86		465	21.67	138.22	24.53
316	232.83	192.23	7.6		465	22.27	138.4	23.74
316	233.65	195.39	7.55		465	21.35	138.22	24.14
316	232.81	196.38	7.71		465	21.47	138.46	23.35
316	232.94	197.31	7.31		465	21.37	138.25	24.08
316	232.46	198.94	7.76		465	21.15	138.46	22.75
316	232.93	201.06	6.29		465	22.17	138.34	23.79
316	232.69	201.47	7.2		465	22.43	138.68	23.55
316	232.96	202.31	6.18		465	22.16	139.2	23.79
316	232.51	201.69	6.93		465	22.09	138.88	22.65
376	92.26	18.69	29.58		465	21.91	139.04	22.95
376	92.71	19.12	27.87		465	22.05	139.44	23.37
376	92.56	16.19	31.36		465	22.62	139.51	22.69
376	92.49	14.6	31.41		465	22.15	139.41	22.4
376	93	14.07	31.82		465	22.91	140.32	22.46
376	93.14	13.05	30.72		465	22.3	139.36	21.61
376	93.43	12.47	31.88		465	22.8	139.86	22.03
376	94.62	11.26	31.3		465	22.82	140.46	21.12
376	94.55	11.72	30.71		465	23.41	140.25	22.55
376	95.16	12.47	30.77		465	23.75	140.5	22.27
376	94.63	13.83	32.1		465	23.78	141.04	22.85
376	91.36	15.14	32.69		465	24	140.19	23.1
376	90.68	13.09	34.29		465	24.05	140.95	22.54
376	91.03	12.53	32.06		465	24.23	140.98	22.35
376	91.1	14.75	34.3		465	24.11	140.47	23.27
376	91.16	14.43	31.73		465	24.18	140.63	21.81
376	92.29	15.02	34.39		465	24.68	141.73	21.95
376	95.09	17.2	33.79		465	24.8	141.44	22.45
376	92.61	19.69	34.47		465	24.95	141.7	20.98
376	92.05	22.25	31.58		465	25.47	141.1	20.8
376	91.18	20.31	31.93		465	24.91	141.68	20.37
376	91.55	20.77	34.77		465	25.31	141.24	22.76
376	92.06	22.61	31.3		465	25.47	141.69	21.51
376	96.37	21.37	33.72		465	25.53	142.37	21.53
376	96.32	22.81	33		465	25.3	142.42	18.83
376	94.7	25.63	32.09		465	25.79	142.62	19.2
376	95.23	26.86	31.07		465	25.47	142.54	20.17
376	95.11	28.71	27.37		465	25.93	142.38	20.26
376	95.35	29.02	27.15		465	26.76	143.1	19.43
376	95.6	31.87	20.2		465	27.11	142.99	20.32
376	94.69	33.35	27.72		465	26.27	143.58	20.44
376	94.69	34.52	23.14		465	27.56	143.51	21.03
376	94.22	35.14	24.25		465	27.71	144.3	19.7
376	94.55	34.7	19.16		465	27.7	144.32	18.6
376	94.8	34.97	24.93		465	27.84	144.38	19.38
376	96.72	33.83	19.17		465	28.45	144.53	18.03
376	98.15	36.54	17.72		465	27.68	144.87	19.68
376	96.39	39.37	16.4		465	28.96	145.5	19.39
376	94.49	42.81	20.95		465	27.78	145.53	18.35
376	94.05	42.48	17.78		465	29.44	145.68	17.09
376	93.62	45.15	22.1		465	28.7	146.11	18.79
376	93.09	45.14	23.78		482	157.2	245.76	29.95
376	93.06	46.2	23.2		482	154.18	246	26.86
376	93.61	46.28	26.3		482	155.02	247.58	26.32
376	94.03	44.96	25.68		482	149.4	246.49	26.44
376	93.98	46.71	26.17		482	148.1	247.47	27.32
376	93.84	47.04	25.4		482	150.34	249.01	26.72
376	94.21	48.47	25.72		482	151.41	250.17	26.72
376	97.24	52	22.41		482	150.06	249.86	24.16
376	97.95	53.43	20.21		482	151.01	250.56	23.52
376	97.26	53.7	20.58		482	151.34	251.34	23.35
376	96.64	51.84	19.65		482	151.3	250.71	23.67
376	95.64	52.09	18.05		482	151.3	250.81	23.22
376	97.88	54.94	18.32		482	152.01	251.39	23.54
376	99.15	55.71	17.79		482	152.53	251.6	23.04
376	99.03	54.36	17.2		482	153.23	251.62	23.13
376	99.4	54.89	15.61		482	153.85	251.53	20.89
376	99.99	54.77	16.69		489	105.4	192.75	9.71
376	98.95	54.6	17.3		489	103.55	192.01	8.29
427	24.96	13.48	11.66		489	104.45	191.37	9.24
427	24.55	13.52	10.84		489	104.15	189.16	8.41
427	24.57	14.37	13.55		489	106.77	192.33	8.47
427	24.11	13.48	12.18		489	105.92	190.72	7.95
427	24.62	13.87	10.2		492	244.83	240.68	4.09
427	23.59	13.88	13.05		492	246.42	240.23	3.87
427	24.29	14.13	11.57		511	108.63	107.91	7.12
427	24.68	12.63	10.75		511	109.05	108.16	7.64
427	24.53	15.01	12.69		511	108.46	108.15	9.26
427	24.42	14.2	13.63		511	109.65	108.85	5.98
427	25.45	14.66	10.77		511	108.47	108.91	7.56
427	24.47	14.98	13.8		511	110.14	109.04	7.5
427	24.21	15.42	16.13		511	108.99	109.3	7.07
427	24.23	14.21	14.27		511	107.92	111.64	7.6
427	25.32	13.33	11.21		511	107.39	112.56	7.2
427	24.13	14.75	12.38		511	104.49	113.77	9.53
427	24.57	13.75	15.08		511	104.05	114.91	10.23
427	23.84	15.06	13.78		511	103.99	114.72	8.19
427	25.04	14.2	10.55		511	104.57	115.17	6.88
427	23.98	14.35	11.68		511	103.95	116.12	8.03
427	24.42	14.47	12.87		511	103.35	116.4	9.61
427	24.08	14.36	13.28		511	103.05	116.64	8.17
427	24.12	14.36	11.63		511	102.58	116.72	8.81
427	24.62	14.7	14		511	103.52	117.2	9.25
427	24.43	15.25	12.99		518	84.91	122.9	10.54
427	24.85	14.81	13.47		518	84.8	122.89	9.76
427	25.05	14.92	10.24		518	85.24	122.05	8.52
427	23.7	15.39	12.84		518	83.47	123.88	9.43
427	24.32	14.84	12.69		518	85.22	123.52	7.5
427	24.57	14.34	10.07		518	84.52	125.11	7.99
427	24.62	14.87	12.61		530	45.24	213.06	3.4
427	24.33	15.41	14.01		530	44.37	213.1	2.82
427	24.32	14.21	13.62		530	44.57	213.91	2.02
427	24.35	15.8	13.73		530	44.79	213.81	3.52
427	24.39	14.38	14.07		530	44.67	214.15	2.77
427	24.34	15.42	13.38		530	44.91	213.95	2.45
427	23.45	15.85	15.72		530	44.54	214.34	2.35
427	23.8	14.21	15.12		530	45.09	214.99	1.97
427	24.57	13.71	13.61		530	44.61	213.99	2.35
427	24.4	13.53	13.47		530	44.75	215.49	0.733
427	23.66	14.02	13.67		530	44.49	215.12	2.07
427	23.41	14.73	14.82		544	8.26	43.31	25.44
427	23.85	14.43	11.97		544	9.49	43.22	25.04
427	24.11	14.41	11.62		544	9.07	42.99	26.42
427	23.95	14.86	9.27		544	9.61	44.8	25.09
427	22.98	14.56	14.94		544	9.14	44.18	26.64
427	23.68	14.3	11.87		544	8.33	44.41	26.94
427	24.13	14.73	11.04		544	8.95	44.11	25.27
427	24.13	14.14	11.46		544	9.25	44.85	25.26
427	24.76	14.39	11.4		544	8.84	45.49	25.86
472	22.67	174.36	8		544	10.65	46.15	23.35
472	22.27	174.51	7.76		544	11.63	46.01	23.09
472	22	174.48	8.74		544	11.88	45.86	22.57
472	22.98	174.55	8.82		544	11.77	46.02	22.05
472	22.92	175.13	8.42		553	236.67	174.92	8.97
472	23.15	174.26	9.4		553	237.48	175.52	11.41
472	23.28	174.05	8.33		553	238.39	174.64	9.6
472	23.02	174.27	9.73		553	237.93	175.72	10.44
472	23.25	174.21	9.55		553	236.71	175.4	8.64
472	22.36	175.19	10.83		553	237.62	175.55	10.49
472	22.58	175.83	10.22		553	236.12	175.33	8.91
472	22.61	175.43	9.56		553	236.87	175.6	6.92
472	22.61	175.29	7.29		565	242.49	238	5.47
472	22.36	174.45	8.28		565	245.43	239.56	7.25
472	22.39	173.99	8.87		565	244.69	238.48	6.05
472	22.41	173.75	7.55		565	244.8	237.83	6.48
472	22.57	174.05	8.74		565	245.44	236.89	7.82
472	22.77	174.17	8.59		565	244.46	239.09	5.89
472	22.96	173.88	8.34		565	243.89	239.54	4.9
472	22.94	174.63	8.27		565	245.86	236.51	6.65
472	21.91	175.32	8.45		565	245.45	239.31	4.62
472	22.21	175.55	9.19		565	244.33	239	5.3
472	22.4	174.77	8		565	243.66	240.55	4.49
472	22.36	175.17	8.71		568	132.07	141.63	11.91
472	22.97	174.23	8.09		568	129.81	142.63	10.47
472	22.58	175.26	9.19		572	75.31	252.13	29.18
472	22.55	175.85	9.92		572	74.74	252.63	29.11
472	22.12	175.76	10.33		572	73.19	252.77	26.4
472	21.82	176	10.54		575	142.36	55.07	12.89
472	22.01	174.83	9.08		575	143.23	54.78	13.24
472	21.94	174.69	10.57		578	89.91	81.83	12.91
472	21.61	175.36	10.36		578	91.25	82.29	12.94
472	21.59	175.81	10.8		582	134.22	130.86	22.96
472	21.86	175.26	10.26		582	135.34	128.46	22.14
472	21.92	175.6	9.62		582	132.24	131.01	20.77
472	21.56	176.44	8.82		585	141.61	172.83	16.44
472	21.14	175.74	7.9		585	143.71	175.83	19.57
472	22.62	174.38	7.25		594	76.37	251.5	26.27
472	21.7	174.4	7.85		594	76.28	251.64	26.58
472	21.94	175.26	7.39		594	75.62	251.65	29.38
472	21.62	175.76	7.77		594	77.28	251.82	27.35
472	21.97	175.68	7.58		594	76.23	251.49	27.87
472	21.37	175.88	8.19		594	75.55	251.37	30.02
472	22.14	175.28	7.62		594	76.4	251.95	27.73
515	119.89	59.66	21.98		594	75.2	252.19	27.72
515	119.94	59.99	21.75		597	125.46	138.26	12.47
515	120.31	60.51	20.7		597	126.88	138.98	12.99
515	120.08	58.88	22.44		601	66.02	174.16	11.51
515	120.92	58.41	21.52		601	67.17	176	11.62
515	120.98	57.79	23.06		601	67.15	174.97	10.26
515	122.01	57.57	23.19		604	132.75	128.09	19.41
515	122.26	58.31	23.69		604	134.11	128.68	22.01
515	122.67	58.35	22.75		607	89.1	82.08	13.55
515	122.58	58.1	22.81		607	89.5	81	12.76
515	122.56	57.8	20.44		610	105.27	189.26	11.14
515	122.7	57.61	19.62		610	104.59	191.67	9.67
515	122.44	56.47	19.75		613	153.14	196.66	18.45
515	121.92	55.85	18.06		613	154.65	197.23	17.97
515	122.19	55.01	17.37		617	140.79	51.8	9.9
515	122.15	54.97	17.2		617	142.54	54	12.15
515	122	55.38	17.25		617	142.91	54.74	12.21
515	122.14	54.89	16.07		626	236.22	171.78	12.11
515	122.11	55.14	16.56		626	237.05	173.15	12.37
515	122.4	54.74	16.03		626	235.41	173.1	11.52
515	122.08	54.2	17.21		626	237.02	173.44	13.87
515	122.29	53.76	16.56		626	235.82	173.41	10.91
515	121.77	54.91	16.33		626	236.74	174.14	13.06
515	120.98	55.11	14.07		626	236.51	174.06	10.79
515	121.08	55.47	14.28		626	238.05	175.18	11.04
515	116.72	56.36	14.76		642	42.71	210.01	6.14
515	120.85	56.76	8.67		642	43.04	210.5	5
515	121.27	56.97	8.62		642	43.01	209.61	6.64
515	120.92	56.52	9.52		642	43.16	210.15	6.47
515	120.72	56.55	5.85		642	42.98	210.68	5.91
515	121.47	56.71	6.97		642	42.92	210.22	6.41
515	120.96	56.62	5.64		642	43.2	210.37	6.25
515	120.68	56.18	11.02		642	43.55	210.26	6.83
515	121.23	55.54	11.69		642	43.06	210.96	6.06
515	121.09	58.18	8.2		642	42.98	211.07	4
515	120.81	56.29	7.57		642	43.54	211.33	4.84
515	120.32	56.64	5.86		642	43.43	212.43	3.26
515	120.04	57.23	6.99		642	43.48	212.25	3.68
515	120.58	55.9	7.21		642	44.04	212.4	3.04
515	120.91	56.59	6.61		642	44.03	212.98	2.2
515	120.61	57.41	5.56		647	119.3	135.29	9.32
515	119.81	56.27	5.31		647	120.06	135.69	10.86
557	61.47	233.4	22.32		647	121.04	136.08	9.21
557	62.2	233.02	20.61		647	121.6	136.27	9.4
557	62.34	231.35	20.66		650	157.49	249.05	31.49
557	66.99	229.11	17.96		650	155.62	249.44	28.8
557	61.47	229.29	19.28		664	134.11	218.05	29.53
557	66.07	228.57	18.75		664	135.04	219.1	29.68
557	61.85	230.02	19.8		664	134.8	218.88	28.49
557	65.87	228.82	18.49		664	135.3	219.06	28.89
557	62.4	229.32	20.42		664	135.6	218.81	28.42
557	61.57	230.37	18.65		664	136.12	220.07	28.44
557	61.91	229.65	16.29		664	136.33	220.45	28.53
557	61.44	229.72	19.72		664	136.32	221.58	28.63
557	61.13	229.13	17.81		664	135.87	221.46	28.38
557	60.04	230.39	17.99		664	135.13	220.27	26.36
557	60.72	229.19	19.03		664	135	222.6	26.9
557	60.68	228.37	17.44		664	134.13	223.56	27.2
557	60.96	228.82	17.66		664	135.22	223.34	26.79
557	60.46	227.43	14.89		667	103.91	195	13.7
557	59.49	227.57	16.48		667	103.81	195.1	11.28
557	57.82	227.22	17.85		677	243.75	235.55	6.37
557	57.45	226.65	15.94		677	243.96	235.31	6.05
557	58.44	227.39	17.24		677	243.72	237.08	5.74
557	57.26	227.84	19.6		677	243.8	237.15	7.45
557	58.19	229.77	20.61		677	243.52	236.21	7.44
557	56.84	231.91	20.16		677	243.94	238.16	7.27
557	57.62	231.88	22.08		677	244.07	236.68	6.94
557	57.68	233.1	22.57		677	243.84	236.7	6.07
557	55.87	234.73	25.18		677	242.98	236.27	7.65
557	55.59	235.99	24.66		682	163.12	68.27	6.65
557	54.87	236.25	26.89		682	162.07	68.26	5.42
557	54.39	237.1	22.85		682	162.88	69.91	7.08
557	54.89	238.33	23.25		682	163.01	70.68	5.86
557	56.21	238.85	23.48		699	115.17	133.81	15.23
557	57.34	239.96	24.51		699	116.53	133.92	13.81
557	58.55	241.03	27.88		699	116.85	133.01	11.29
557	61.63	242.47	29.44		699	116.9	133.49	12.96
557	60.38	242.23	29.69		699	117.57	133.86	12.84
557	60.65	242.46	30.84		699	117.77	134.24	13.02
557	61.72	242.79	33.22		699	119.67	133.41	12.84
557	62.66	243.11	30.13		699	118.42	133.86	12.87
557	61.28	243.19	32.99		699	121.69	134.6	13.95
597	102.74	83.63	5.44		699	120.55	134.2	10.21
597	105.8	83.97	6.67		699	120.04	135.32	13.09
597	106.37	82.97	4.83		699	119.14	134.87	8.98
597	106.53	82.85	7.12		699	120.03	135.08	12.01
597	106.84	82.56	5.34		699	120.55	135.34	12.05
597	107.25	82.98	6.78		699	121.18	135.77	11.08
597	108.13	83.48	5.8		699	122.83	135.49	11.27
597	109.2	83.6	4.4		707	75.05	250.95	29.25
597	110.06	84.64	4.83		707	74.96	250.48	32.76
597	109.38	83.02	7.31		707	74.37	251.17	29.01
597	108.24	82.57	6.27		707	74.82	250.91	29.43
597	109.37	83.48	3.89		707	73.37	251.95	28.72
597	109.67	83.2	4.55		707	74.74	251.58	30.83
597	108.79	83.44	3.87		707	76.02	251.61	31.18
597	108.82	83.51	4.76		711	88.2	81.12	13.07
597	108.86	83.03	6.69		711	88.46	80.68	14.57
597	109.28	82.9	5.36		711	88.26	81.29	14.59
597	110.24	82.22	5.57		715	250.66	207.02	1.11
597	109.38	82.88	7.18		715	251.04	207.1	0.756
597	109.22	83.32	5.02		715	251.1	206.76	0.375
597	109.87	82.94	4.86		738	103.13	196.95	18.61
597	110.04	83.97	3.47		738	105.7	199.1	20.06
597	110.68	83.24	5.93		738	107.46	200.45	19.42
597	109.61	83.31	6.61		738	107	198.58	18.38
597	108.89	84.3	5.85		738	107.5	199.89	17.38
597	109.57	83.54	4.54		738	107.6	200.14	19.03
597	109.18	83.21	6.24		738	104.83	199.56	19.51
597	108.64	83.13	5.8		738	104.98	200.16	18.4
597	108.17	82.91	5.47		738	104.1	201.13	21.29
597	108.62	82.61	7.32		738	104.17	200.77	20.44
597	110.11	84.04	5.96		738	103.06	200.43	19.62
597	109.37	83.57	4		738	103.97	200.98	20.02
597	108	83.13	3.43		738	104.38	200.79	19.66
597	107.73	82.65	4.48		738	103.64	201.58	19.76
597	106.24	81.49	8.13		738	102.95	202.18	17.53
597	107.28	83.2	5.64		738	103.16	201.24	18.42
597	104.35	81.94	3.01		738	103.78	201.03	19.86
597	106.55	81.61	5.6		738	104.7	201.05	19.09
597	104.57	82.24	5.82		738	103.18	199.38	18.61
635	6.48	173.32	35.64		738	103.83	198.98	17.23
635	6.11	171.82	37.38		738	106.43	199.19	17.38
635	5.99	175.7	36.74		738	103.64	197.54	16.7
635	6.07	176.16	38.25		741	117.78	201.18	16.39
635	4.83	178.14	36.08		741	118.96	205.78	19.94
635	5.77	177.39	34.24		745	153.42	197.9	31.3
635	6.26	178.71	34.17		745	154.72	200.16	34.89
635	6.31	179.62	35.87		745	154.53	199.62	39.56
635	6.03	178.09	34.72		748	164.12	7.19	5
635	6.04	180.01	36.85		748	164.36	6.36	4.45
635	5.45	182.75	35.93		752	62.63	163.58	4.92
635	5.46	181.51	37.33		752	63.81	163.02	2.65
635	5.26	181.76	35.08		752	62.36	164.03	4.63
635	5.79	181.48	36.36		756	108.99	107.72	9.17
635	5.25	182.64	36.68		756	109.77	107.21	8.56
635	7.07	181.5	37.18		756	110.36	107.78	9.94
635	5.71	178.91	36.07		781	232	167.09	17.34
635	5.75	178.01	36.9		781	232.65	167.6	13.99
635	5.75	177.55	38.75		781	232.49	167.15	18.24
635	5.42	179.31	37.6		781	232.75	168.06	15.52
635	5.69	180.27	38.09		781	232.36	168.11	15.91
635	5.62	179.66	37.26		781	232.96	168.67	16.2
635	6.44	175.08	36.35		781	232.43	168.31	16.75
635	4.65	178.73	37.53		781	232.67	168.97	14.92
635	5.05	178.72	36.17		781	233.17	169.41	13.8
635	4.46	179.8	37.73		781	233.73	168.92	15.03
635	4.58	180.68	37.49		781	233.07	168.97	15.9
635	5.1	181.47	37.75		781	233.91	169.68	13.66
635	6.08	181.2	33.48		781	233.31	169.3	14.15
635	4.37	181.44	34.94		781	235.84	170.71	16.11
635	5.12	181.57	35.85		781	233.83	170.2	14.75
635	4.97	180.76	34.64		781	234.71	170.54	15.49
635	5.47	182.25	36.24		781	234.02	170.53	15
635	6.58	181.24	35.21		781	235.01	172.27	14.16
635	6.62	181.41	34.81		781	235.87	171.23	13.26
635	6.79	182.05	32.87		781	235.69	171.71	15.08
635	6.92	181.57	34.37		781	236.13	171.93	12.55
670	101.77	18.19	36		781	236.19	171.11	14.29
670	101.66	17.28	35.83		781	235.88	171.87	13.24
670	101.4	18.52	33.36		781	236.68	172.62	12.95
670	101.46	18.15	34.18		790	44.64	176.86	7.24
670	99.97	18.84	35.31		790	47.41	174.25	5.38
670	100.15	17.04	35.65		790	50.26	172.42	4.88
670	99.24	18.31	35.66		790	56.65	168.14	2.81
670	99.99	19.11	36.23		790	59.45	166.29	3.78
670	101.16	19.13	32.91		790	59.01	166.47	2.16
670	101.94	19.23	34.01		790	59.77	167.12	3.72
670	102.55	19.92	34.42		790	58.97	168.08	2.32
670	102.11	19.59	33.22		794	88.36	79.26	16.36
670	102.41	19.11	32.24		794	87.71	80.67	15.3
670	102.09	17.87	34.03		794	88.26	80.64	15.95
670	101.96	18.83	32.74		797	65.14	172.16	12.62
670	98.69	19.53	34.66		797	64.3	171.43	13.71
670	98.73	18.64	37.11		800	6.3	42.3	32.02
670	98.83	19.42	36.6		800	7.58	45.32	33.99
670	97.99	17.8	36.88		810	72.62	247.43	28.48
670	97.4	17.3	36.81		810	72.65	247.66	28.65
670	95.82	16.65	37.9		810	73.65	248.12	31.01
670	93.74	17.33	39.39		810	73.77	247.59	33.28
670	96.94	18.16	37.24		810	73.59	249.11	30.48
670	98.3	18.31	37.85		810	73.48	249.85	33.74
670	98.29	17.51	35.45		810	74.46	250.08	29.82
670	97.2	17.59	35.75		810	74.36	250.26	28.97
670	95.77	18.18	34.11		810	72.31	249.32	27.11
670	95.89	17.37	35.07		813	126.34	130.56	21.96
670	96.25	17.5	33.39		813	127.23	130.4	25.19
670	96.49	17.07	33.38		828	71.84	201.66	6.57
670	96.96	17.79	33.27		828	71.13	202.5	6.57
670	96.73	16	35.22		828	71.09	202.67	6.91
670	97.94	17.42	33.66		828	72.22	202.6	8.4
670	99.47	17.97	29.43		828	72.61	202.7	6.23
697	205.16	252.23	28.22		828	75.06	201.94	6.18
697	204.96	250.8	27.36		828	78.31	201.63	3.9
697	204.96	250.67	30.78		828	78.8	201.97	3.1
697	204.51	249.63	29.38		828	78.84	202.41	3.42
697	204.33	248.46	30.24		828	78.68	202.78	4.03
697	202.9	247.48	30.7		828	75.55	202.98	6.38
697	201.61	245.17	31.42		828	78.03	203.58	3.68
697	198.83	243.6	30.33		828	75.57	203.32	6.01
697	196.48	242.3	28.63		828	76.62	203.91	4.97
697	195.07	242.95	32.1		832	134.9	222.14	30.4
697	193.77	243.15	30.71		832	135.7	220.34	29.59
697	193.01	243.87	31.24		832	134.54	221.9	29.61
697	191.92	244.93	31.12		835	242.71	235.78	6.7
697	191.38	244.43	29.19		835	244.11	236.39	5.3
697	190.97	244.87	31		842	88.95	82.96	14.4
697	190.21	245.79	29.76		842	88.59	83.45	13.79
697	189.74	246.21	29.01		842	88.22	80.47	17.83
697	189.56	246.15	26.56		842	88.4	81.67	15.38
697	191.16	246.09	27.53		842	88.39	80.05	17.98
697	190.23	246	28.15		842	88.4	80.46	16
697	189.46	247.34	28.2		845	151.87	198.64	38.84
697	188.82	248.98	29.26		845	151.34	199.87	41.07
697	189.43	249.19	30.94		848	152.68	193.91	23.22
697	191.17	248.58	29.6		848	154.89	195.17	21.28
697	191.16	248.53	29.75		853	70.73	202.55	9.2
697	191.23	248.94	28.99		853	71.33	203.13	6.46
723	215.39	143.1	12.41		853	70.86	202.85	8.07
723	216.88	145.6	12.03		853	70.9	202.4	11.77
723	217.14	146.9	13.12		867	241.07	234.06	7.44
723	217.68	146.57	10.37		867	241.24	234.7	5.34
723	218.07	147.45	9.88		867	241.21	234.65	8.2
723	218.38	146.73	8.91		867	241.12	234.07	6.77
723	218.02	148.49	11.16		867	242.09	234.08	5.95
723	217.38	148.08	12.25		867	241.76	234.84	6.47
723	218.23	148.05	11.46		867	241.81	234.15	7.04
723	219.08	148.14	10.66		867	242.34	235.25	6.37
723	218.52	148.2	11.89		867	243.03	233.63	6.76
723	218.2	148.52	12.39		867	242.5	234.05	8.93
723	219.01	148.17	10.4		867	241.86	237.06	7.03
723	220.03	147.37	11.17		867	242.03	234.17	5.51
723	219.86	148.65	12.32		867	242.73	236.85	7.87
723	219.4	148.7	9		870	134.27	222.01	30.06
723	219.56	149.06	9.55		870	134.45	220.25	28.97
723	218.15	148.52	9.32		873	151.8	196.84	35.97
723	218.91	148.85	10.3		873	151.58	198.42	41.1
723	217.96	147.98	10.87		876	160.28	17.57	8.97
723	218.7	147.85	8.58		876	159.82	16.56	8.27
723	218.18	147.57	10.87		886	78.97	243.03	37.55
723	218.18	147.59	9.73		886	77.55	244.84	38.63
723	218.61	148.75	9.99		886	78.39	244.32	40.89
723	217.45	148.12	11.05		886	77.99	246.91	38.77
747	252.6	225.72	16.41		886	78.04	248.74	37.18
747	251.74	225.14	14.33		886	77.87	245.45	37.4
747	251.58	225.03	17.24		886	79	248.53	38.36
747	250.92	223.71	14.66		886	79.22	248.31	35.75
747	249.96	223.06	15.96		886	80.73	248.73	39.93
747	248.58	221.61	16.92		913	40.25	206.6	16.07
747	248.24	220.66	16.35		913	40.88	206.68	14.05
747	247.84	219.1	15.18		913	40.87	207.27	14.97
747	246.5	218.57	13.23		913	40.98	207.51	13.56
747	245.24	216.54	15.94		913	40.91	207.58	9.96
747	243.73	213.62	17.49		913	41.26	208.06	6.88
747	242.82	211.66	17.58		913	40.48	208.05	7.03
747	242.38	212.09	14.59		913	41.36	208.15	6.57
747	242.9	210.77	11.14		913	40.61	208.26	6.96
747	242.83	211.32	10.99		913	40.61	208.01	6.02
747	243.14	212.38	9.43		913	40.65	207.76	6.31
747	243.22	210.8	9.45		913	40.81	206.99	5.81
747	244.71	210.01	5.79		913	40.34	208.47	4.6
747	245.59	210.02	6.69		913	39.96	207.66	5.04
747	245.47	210.12	6.48		913	40.73	209.5	3.87
747	245.02	209.79	9.74		913	40.36	208.55	4.1
747	244.92	210.21	9.21		913	41.01	208.95	3.38
747	244.04	210.02	10.69		913	40.85	208.13	5.51
770	152.19	31.77	27.6		913	40.73	209.79	3.37
770	146.59	33.76	22.83		913	41.11	209.45	3.25
770	148.16	32.54	23.79		913	41.23	209.19	3.93
770	149.67	31.69	25.88		913	41.79	209.18	5.47
770	147.99	33.44	21.54		913	41.27	208.83	4.64
770	148.15	34.43	21.72		913	41.31	208.94	5.04
770	149.21	34.09	19.66		913	41.77	209.11	4.58
770	146.76	34.68	23.57		913	41.41	209.8	4.88
770	146.06	33.29	23.49		918	152.39	197.16	23.27
770	144.32	33.6	21.92		918	153.17	195.1	28.79
770	143.32	34.78	19.42		918	153.94	195.23	21.42
770	143.56	35.53	18.66		918	153.96	195.96	23.64
770	142.94	37.38	14.86		921	159.86	15.7	8.54
770	144.84	37.27	10.75		921	158.82	16.54	8.43
770	145.42	36.89	9.65		930	55.02	2.06	14.76
770	145.81	34.53	8.5		930	56.34	1.46	16.32
770	146.04	31.33	6.86		930	57.47	1.49	17.57
770	146.56	28.36	6.33		930	57.09	1.61	17.48
770	145.86	28.61	6.07		930	56.54	2.26	16.93
770	146.43	25.41	7.26		930	57	2.84	17.5
770	145.53	24.16	6.36		930	57.69	1.36	18.32
770	144.46	25.61	6.35		930	56.93	2.91	17.73
792	80.54	222.02	22.45		935	37.61	176.67	8.6
792	80.2	223.44	19.62		935	40.71	177.83	7.07
792	82.86	224.51	23.99		935	44.07	176.04	6.19
792	84.19	224.94	21.32		935	42.77	176.44	6.31
792	85.89	225.56	21.61		939	126.84	129.71	24.86
792	84.7	219.96	18.01		939	126.82	130.27	25.69
792	85.22	219.62	17.68		939	126.94	129.77	24.16
792	86.27	219.55	19.31		944	172.09	248.69	33.15
792	86.15	221.46	20.5		944	172.29	247.74	33.02
792	84.6	223.51	19.91		944	174.58	248.97	35.81
792	82.85	224.63	17.16		944	171.95	249.02	34.88
792	80.41	226.38	17.54		949	152.49	195.62	30.73
792	81.34	227.29	13.76		949	151.47	197.05	36.07
792	80.93	229.38	12.37		949	151.86	196.89	34.12
792	81.2	229.6	12.13		949	151.55	196.62	40.94
792	81.24	229.49	11.65		957	162.3	2.96	4.32
792	82.2	229.48	10.97		957	162.71	4.15	4.18
792	82.12	230.46	11.1		957	162.34	4.2	4.95
792	80.06	232.92	11.36		957	162.68	4.16	5.04
792	79.78	232.36	11.66		957	162.05	4.93	5.48
792	78.89	232.73	13.52		957	163.12	3.47	4.26
805	6.21	94.63	12.89		957	162.45	3.13	3.45
805	7.4	90.64	11.19		970	91.36	121.43	15.15
805	5.61	91.73	10.32		970	92.46	121.75	13.67
805	5.41	91.76	8.33		970	93.87	123.32	11.92
805	4.92	91.74	8.6		970	92.49	123.56	12.15
805	5.39	91.54	9.11		970	91.36	124.32	11.65
805	5.8	91.12	8.84		970	91.23	123.09	11.79
805	5.64	93.63	11.94		970	90.53	123.07	11.5
805	5.34	91.6	8.88		970	89.74	123.9	11.66
805	4.89	92.29	9.13		970	90.44	123.47	14.1
805	4.55	92.69	9.14		970	87.94	123	12.36
805	4.67	92.07	7.97		970	88.12	123.17	12.53
816	44.15	209.43	26.39		970	84.93	124.11	11.37
816	44.56	209.31	28.29		978	89.87	88.56	18.67
816	46.05	207.23	25.51		978	89.23	88.44	18.16
816	44.9	206.9	31.45		978	89.92	87.43	16.59
816	43.72	204.7	32.79		978	89.68	89.51	21.5
816	41.76	202.47	31.73		978	90.01	88.94	17.5
816	39.97	202.08	33.2		978	90.59	86.96	14.7
816	39.06	201.32	33.48		978	90	85.29	13.97
816	38.78	198.67	32.61		985	87.85	128.49	6.14
816	38	196.33	32.82		985	86.74	130.49	6.39
825	90.07	211.97	14.38		985	85.35	131.61	7.46
825	89.52	208.76	18.23		985	85.7	132.01	5.42
825	88.56	205.49	17.7		985	84.32	135.35	4.6
825	88.87	204.96	16.48		985	84.54	132.97	5.45
825	89.28	201.36	15.7		1006	132.71	217.22	39.41
825	88.68	200.19	14.21		1006	131.22	217.95	36.02
825	88.8	199.17	13.56		1006	131.52	216.55	33.22
825	88.33	196.1	11.87		1006	132.17	217.68	32.25
834	4.83	239.01	35.05		1006	132.28	218.37	30.66
834	5.51	238.83	34.82		1006	131.88	218.9	32.1
834	5.94	238.1	36.12		1006	131.43	218.42	30.5
834	6.16	238.12	35.52		1006	132.04	219.02	32.51
834	6.11	237.96	36.92		1006	132.8	216.84	30.76
834	6.34	237.77	36.1		1006	131.55	220.69	29.44
834	6.74	238.5	35.56		1006	132.27	220.57	30.7
834	7.23	238.08	37.72		1006	132.71	219.82	29.77
842	4.41	136.5	15.46		1006	131.88	219.89	28.89
842	4.3	135.7	14.19		1006	132.95	219.62	30.11
842	4.38	136.23	15.75		1006	132.26	220.27	29.58
842	4.2	136.2	15.79		1006	131.53	219.06	30.35
842	3.78	137.24	14.32		1006	131.74	220.57	30.33
842	4.04	137.23	13.02		1006	132.62	222.43	27.29
842	4.13	136.67	14.5		1006	132.77	221.31	28.45
850	33.12	51.78	15.7		1006	132.36	221.29	28.8
850	35.71	52.11	16.67		1010	71.21	247.86	29.19
850	38.42	51.62	18.6		1010	72	248.17	28.2
850	40.39	51.37	20.54		1010	74.8	246.75	34.15
850	42.68	52.07	18.67		1025	44.64	171.42	6.81
850	46.88	54.71	20.54		1025	47.52	169.43	7.53
850	47.01	55.59	19.75		1025	44.02	173.3	10.63
856	12.4	224.42	28.98		1025	45.36	171.71	7.59
856	13.92	223.73	30.92		1025	44.14	172.84	7.91
856	16.96	222.57	30.76		1025	40.95	172.86	4.52
856	20.94	221.67	30.08		1025	42.2	173.8	5.98
856	22.97	221.29	28.17		1025	43.19	174.46	6.51
862	27.48	122.5	12.74		1025	41.54	175.49	7.32
862	25.89	124.75	12.4		1025	43.97	174.89	6.5
862	29.22	124.32	12.9		1025	41.79	177.33	7.15
862	30.67	125.02	9.64		1025	43.66	174.91	6.44
862	30.81	125.19	10.59		1025	42.82	176.07	7.49
866	15.98	128.69	12.82		1025	44.54	174.41	5.4
866	14.31	130.56	13.21		1044	83.03	193.17	5.46
866	13.49	131.67	12.91		1044	82.65	193.22	7.36
869	231.25	103.5	3.53		1044	82.2	193.14	5.47
869	232.59	100.84	10.68		1044	81.5	193.44	3.08
872	2.13	122.07	3.69		1044	82.52	193.24	1.72
872	1.95	121.18	5.61		1044	82.2	193.02	2.86
875	3.44	17.76	9.84		1044	82.25	192.97	2.57
875	4.41	16.35	8.15		1044	81.66	191.55	3.3
878	219.44	18.57	13.45		1044	81.21	190.94	2.23
878	218.86	18.38	11.85		1044	81.01	190.66	2.31
881	183.18	39.58	21.75		1044	81.04	191.19	2.4
881	183.17	40.12	20.66		1044	81.29	190.96	1.69
884	191.09	87.65	14.53		1044	81.65	191.27	2.01
884	194.62	84.54	13.5		1044	81.65	191.7	1.49
887	186.03	94.96	16.05		1044	81.48	190.57	1.67
887	184.34	89.27	15.57		1044	81.8	191.72	1.69
890	212.53	92.56	19.15		1044	81.87	192.05	1.73
890	209.12	87.87	15.7		1044	81.76	192.51	1.17
893	68.02	157.37	26.47		1048	1.17	11.28	16.61
893	65.56	160.03	30.15		1048	0.857	12.51	15.78
896	218.96	91.01	13.11		1048	0.741	12.29	15.67
896	219.11	85.75	14.49		1051	155.3	65.72	6.23
899	249.08	54.82	15.09		1051	157.96	66.57	9.84
899	247.52	55.26	18.18		1056	106.92	199.37	18.31
902	46.3	96.63	22.77		1056	106.76	199.17	18.91
902	47.96	96.62	22.56		1056	112.35	195.88	18.52
906	249.53	230.83	35.56		1056	113.67	193.8	14.89
906	250.2	229.33	34.82		1066	149.17	195.73	40.25
906	251.38	228.81	31.59		1066	149.98	195.65	40.99
909	200.51	137.03	20.04		1066	149.19	196.83	41.71
909	198.53	136.74	19.71		1066	150.23	195.54	42.15
916	103.87	6.08	12.37		1066	150.06	195.79	41.65
916	103.21	6.78	10.68		1066	150.48	196.77	39.48
916	103.06	5.09	10.48		1066	150.81	196.88	38.79
916	102.49	5.88	10.32		1066	150.86	196.22	36.45
916	102.96	5.96	9.85		1066	150.3	196.66	39.14
916	103.04	6.5	11.59		1069	63.05	164.24	14.75
921	200.44	199.96	5.23		1069	62.78	164.99	13.75
921	198.38	199.29	4.79		1075	113.1	195.33	18.49
921	194.87	199.93	5.13		1075	111.97	195.4	17.87
921	193.78	199.45	4.12		1075	112.24	194.46	18.71
930	70.68	46.72	14.63		1075	112.45	195.89	19.37
930	69.45	43.94	13		1075	113.52	192.71	14.84
930	70.7	45.24	10.59		1078	128.84	129.11	30.24
930	70.37	44.65	12.51		1078	126.21	129.49	27.76
930	69.81	43.87	11.63		1086	69.95	247.1	30.05
930	68.69	44.14	9.95		1086	70.44	246.77	31.5
930	68.59	45.42	10.22		1086	73.2	246.15	29.94
930	68.94	45.4	10.12		1086	71.95	247.24	28.31
941	186.92	103.76	22.03		1086	69.85	248.53	30.54
941	187.5	96.99	21.75		1086	70.22	248.67	28.14
941	188.57	95.45	20.1		1086	71.65	247.19	29.31
941	189.34	96.99	20.59		1101	55.69	1.55	27.67
941	190.2	99.13	21.65		1101	55.07	0.865	24.56
941	188.6	98.54	22.96		1101	54.47	1.07	24.34
941	189.5	96.96	21.37		1101	54.12	1.17	22.97
941	187.63	99.48	20.13		1101	53.32	1.38	21.07
941	187.29	100.87	22.29		1101	53.22	1.31	19.16
941	188.86	105.17	18.46		1101	55.09	1.79	18.58
944	199.41	75.03	11.22		1101	54.39	1.44	19.37
944	200.24	76.38	10.66		1101	55.11	2.01	18.71
947	148.34	237.71	18.17		1101	54.35	1.51	19.79
947	148.94	237.26	20.97		1101	55.3	1.52	17.55
950	154.58	95.15	27.03		1101	54.93	1.15	15
950	153.83	93.55	20.69		1101	54.65	1.63	17.76
953	88.79	5.55	37.86		1101	55.14	1.11	16.48
953	90.11	5.43	36.51		1104	159.87	16.08	9.82
1025	190.56	2.3	10.64		1104	158.92	17.29	9.96
1025	190.18	2.94	9.12		1109	242.08	232.73	7.98
1025	190.56	4.2	8.25		1109	242.35	232.62	7.3
1025	189.68	4.91	8.5		1109	242.1	232.61	7.33
1025	190.49	4.45	9.66		1109	240.69	232.5	8.54
1025	190.58	5.12	9.59		1112	90.05	88.27	19.83
1025	189.89	5.16	9.18		1112	90.89	87.85	20.05
1025	189.66	5.26	8.79		1115	60.76	163.05	14.72
1025	189.64	6.49	8.69		1115	61.3	164.09	16.9
1025	189.28	7.04	9.77		1118	152.06	242.7	32.19
1025	189.97	7.89	9.93		1118	151.67	241.92	31.38
1025	190.17	9.49	9.12		1123	94.6	121.45	14.84
1025	190.27	9.49	10.66		1123	94.21	125.63	13.11
1025	189.74	9.84	9.81		1123	96.61	128.9	11.43
1025	189.01	8.29	10.51		1123	96.48	127.41	9.74
1025	188.44	8.85	10.99		1126	152.98	67.88	5.67
1025	188.96	8.21	10.51		1126	154.79	68.1	6.99
1025	188.93	7.09	11.5		1131	232.15	166	23.33
1025	190.38	5.69	10.41		1131	232.6	166.2	22.81
1025	190.35	5.79	10.34		1131	233.16	166.6	23.02
1025	192.36	4.85	9.57		1131	233.16	166.98	17.74
1025	192.27	5.82	8.6		1142	108.43	185.54	21.2
1025	192.5	5.46	8.14		1142	109.33	188.1	22.22
1025	191.65	6.41	8.26		1142	109.47	189.54	24.6
1025	192.53	6.39	6.77		1142	112.04	191.23	24.06
1025	192.44	6.94	7.74		1142	110.68	190.02	18.77
1025	193.16	5.99	8.43		1142	112.58	191.79	19.68
1025	192.78	5.98	9.08		1142	114.18	192.48	20.06
1025	191.22	6.54	7.23		1142	114.99	193.48	21.41
1025	190.74	6.5	7.54		1142	113.32	192.97	19
1025	191.02	6.62	6.84		1142	114.36	194.62	18.45
1025	190.42	7.24	8.19		1146	160.18	15.72	11.38
1025	186.68	10.85	8.8		1146	159.18	16.58	10.92
1025	189.74	7.91	9.07		1146	158.28	15.42	10.71
1025	189.28	7.73	9.23		1156	64.18	63.79	5.68
1025	188.27	8.29	9.74		1156	63.23	64.21	4.42
1025	188.5	9.34	10.08		1156	63.59	64.53	5.84
1025	188.73	8.76	10.8		1156	63.48	63.86	4.21
1025	N/A	N/A	N/A		1156	64.08	64.73	1.57
1025	187.89	10.09	10.81		1156	63.94	64.93	1.06
1025	187.09	10.19	10.39		1156	62.96	65.95	1.24
1025	188.26	10.36	10.71		1156	64.11	65.01	1.47
1025	188.69	10.04	8.54		1156	64.03	66.06	1.15
1025	188.51	10.27	8.81		1166	182.67	48.67	5.75
1025	187.68	10.03	8.69		1166	182.44	49.17	4.35
1025	186.08	10.18	7.83		1166	182.49	48.82	4.81
1025	187.01	10.87	9.41		1166	181.73	48.98	3.5
1025	187.68	10.91	8.54		1166	179.93	51.07	1.31
1025	188.17	10.79	8.53		1166	177.98	50.99	1.1
1025	188.31	11.35	9.32		1166	179.22	51.66	0.987
1025	187.46	11.17	9.91		1166	179.96	50.63	0.955
1025	188.5	10.77	8.37		1166	185.14	48.53	1.18
1025	188.06	9.64	9.39		1170	94.75	130.02	14.78
1025	187.7	10.55	9.03		1170	95.78	129.35	13.26
1025	189.19	9.73	9.15		1170	96.09	130.01	12.82
1025	188.99	10.65	9.82		1175	242.14	231.19	10.6
1025	191.63	10.63	10.15		1175	241.79	232.52	8.89
1025	193.38	11.18	10.89		1175	241.58	231.72	9.45
1025	195.9	12.29	10.98		1175	241.21	234.38	10.43
1025	197.13	14.28	9.73		1179	99.8	122.44	15.17
1025	198.36	16.21	9.57		1179	99.57	122.23	15.24
1025	201.9	17.5	9.78		1179	98.73	123.63	13.65
1025	203.3	18.9	9.82		1189	88.63	120.56	24.32
1025	204.4	18.92	9.49		1189	90.16	121.92	23.99
1025	206.56	18.77	8.92		1189	88.9	121.31	24.18
1025	210.35	19.62	8		1189	89.41	121.37	22.97
1025	212.68	18.76	8.15		1189	89.05	122.26	17.99
1025	211.75	19	7.39		1189	88.85	121.66	17.9
1025	208.65	18.53	6.61		1189	87.9	122.02	17.22
1025	211.51	18.26	8.26		1189	89.49	121.57	16.77
1025	212.61	19.32	5.86		1189	88.38	122.82	17.13
1032	216.98	29.3	10.03		1194	90.18	88.52	26.4
1032	214.78	29.86	4.82		1194	90.12	88.29	24.8
1032	217.8	29.61	12.17		1194	90.46	88.16	23.43
1032	216.91	29.37	8.03		1194	90.35	88.78	21.78
1032	215.86	29.32	5.67		1197	252.37	248.61	4.29
1032	216.66	29.37	6.01		1197	250.17	251.4	9.56
1035	2.77	119.33	9.12		1201	184.87	46.87	2.09
1035	2.15	119.17	4.2		1201	183.33	47.68	1.04
1038	185.22	190.96	4.88		1201	185.99	47.29	1.44
1038	183.39	193.82	4.96		1209	177.76	76.64	3.91
1044	6.29	16.55	8.5		1209	178.64	76.66	3.06
1044	5.78	16.12	10.22		1209	178.21	76.7	3.18
1044	2.25	19.8	7.83		1209	178.49	77.01	2.21
1044	5.8	16.05	7.23		1209	178.81	76.47	1.9
1044	4.1	17.95	10.17		1209	180.05	75.9	1.84
1047	185.19	43.47	21.25		1209	179.67	75.8	2.48
1047	182.43	41.4	20.19		1213	152.81	67.3	10.05
1050	69.98	192.02	13.4		1213	152.52	67.61	7.09
1050	70.62	193.17	10.71		1213	152.89	67.87	7.85
1053	244.09	35.45	28.62		1219	49.65	167.38	15.48
1053	243.31	36.88	25		1219	48.6	168.31	12.34
1056	243.53	73.35	13		1219	49.39	167.33	12.65
1056	239.94	72.4	18.75		1219	49.41	167.88	12.5
1076	68.78	157.02	26.76		1219	46.97	169.36	9.65
1076	69.91	158.18	28.4		1222	140.72	168.46	27.25
1076	67.72	159.8	29.62		1222	140.92	169.67	28.08
1076	68.58	158.27	24.42		1226	115.94	64.11	6.43
1076	69.87	155.53	24.61		1226	116.44	67.28	6.82
1076	69.9	155.48	24.46		1226	114.86	64.42	5.05
1076	70.29	153.13	22.46		1231	177.5	124.88	2.07
1076	69.67	152.43	24.69		1231	175.18	126.65	1.33
1076	71.31	150.76	25.13		1231	174.97	126.82	1.23
1076	71.16	151.5	23.54		1231	177.61	125.25	1.07
1076	70.6	152.44	24.33		1235	242.44	231.76	14.9
1076	69.6	152.39	26.68		1235	241.83	233.04	16.48
1076	70.13	152.34	23.86		1235	242.28	233.08	15.4
1076	70.29	152.23	22.31		1238	183.54	121.74	1.3
1076	69	155.29	23.17		1238	182.37	121.85	1.68
1076	68.48	156.06	25.51		1242	112.73	124.71	24.41
1076	67.94	157.37	25.02		1242	112.97	125.09	24.27
1076	66.78	158.42	30.89		1242	111.98	123.86	23.94
1076	67.27	158.5	25.05		1245	78.9	199.41	12.35
1079	189.63	87.39	12.38		1245	79.17	199.22	10.94
1079	191.44	88.22	16.03		1248	241.81	235.13	17.12
1083	232.89	66.13	12.75		1248	242.53	235.68	15.88
1083	234.03	65.71	9.53		1251	150.8	65.99	13.98
1083	236.54	64.44	12.95		1251	153.46	68.09	10.58
1088	205.32	97.22	8.51
1088	206.53	92.22	13.32
1088	210.04	89.64	13.26
1088	213.07	88.67	16.63
1094	238.35	57.47	15.72
1094	245.36	56.24	19.25
1094	243.03	52.15	22.61
1094	241.6	53.56	15.94
1094	241.34	50.05	16.89
1098	44.32	88.68	27.24
1098	45.3	89.03	26.44
1098	45	88.11	23.69
1101	99	117.63	22.12
1101	99.33	116.25	25.92
1104	244.43	236.32	35.45
1104	244.2	236.67	37.72
1107	212.52	79.72	13.05
1107	214.44	86.5	13.11
1126	2.42	237.18	36.53
1126	2.13	237.72	36.66
1126	3.37	237.55	36.01
1126	3.87	237.61	36.09
1126	3.86	237.5	36.78
1126	3.61	237.77	36.85
1126	4.13	237.77	37.72
1126	3.98	237.67	36.87
1126	7.23	233.7	36.85
1126	7.05	233.89	35.66
1126	7.42	233.1	36.07
1126	7.46	233.07	36.11
1126	6.43	234.47	37.2
1126	5.63	235.54	37.05
1126	6.08	234.28	34.44
1126	5.7	233.76	32.27
1126	7.17	229.39	31.26
1126	7.17	228.02	31.78
1130	198.92	193.13	9.13
1130	202.86	194.44	9.78
1130	203.61	194.68	7.4
1134	160.72	110.95	6.13
1134	160.04	112.19	7.72
1134	161.64	113.43	9.63
1137	249.86	48.82	17.29
1137	250.18	49.8	18.9
1140	239.97	65.28	29.1
1140	238.19	61.82	28.89
1143	2.36	119.7	6.94
1143	3.02	120.54	6.76
1147	188.27	85.36	12.16
1147	184.73	87.11	18.67
1147	188.75	82.1	22.94
1150	211.84	93.96	19.68
1150	210.65	90.33	14.47
1156	5.11	134.82	17.82
1156	5.09	135.04	16.78
1156	4.74	135.97	17.32
1156	4.22	136.87	16.55
1156	4.5	136.51	14.2
1164	31.72	53.22	27.81
1164	33.94	52.74	24.41
1164	33.46	51.95	21.18
1164	30.71	51.49	22.89
1164	33.82	51.43	20.12
1164	33.25	51.66	18.7
1164	32.38	51.73	17.3
1176	18.91	117.45	8.72
1176	19.28	117.81	8.93
1176	20.31	118	9.29
1176	20.7	118.08	8.98
1176	22.74	117.95	11.84
1176	24.31	117.73	11.51
1176	25.56	118.57	14.27
1176	25.69	118.55	14.28
1176	26.24	119.02	13.27
1176	26.71	119.74	11.49
1176	27.01	119.54	10.9
1179	225.64	91.75	9.92
1179	225.84	93.84	12
1191	13.06	129.26	16.32
1191	13.79	129.15	14.16
1191	11.07	130.84	15.13
1191	10.78	130.7	15.22
1191	11.16	130.87	17.65
1191	10.14	131.43	15
1191	15.47	129.27	15.93
1191	16.33	130.46	15.41
1191	16.28	127.91	14.74
1191	16.63	128.85	15.08
1191	16.71	128.13	13.89
1211	16.89	147.33	31.78
1211	16.93	147.02	31.79
1211	16.74	147.02	31.8
1211	16.63	146.53	31.7
1211	16.02	146.42	32.57
1211	14.69	145.55	33.39
1211	13.16	146.15	34.85
1211	12.85	147.05	35.15
1211	13.6	147.07	36.31
1211	14.45	146.5	36.86
1211	15.1	146.07	38.05
1211	15.17	145.41	37.16
1211	15.95	143.62	38.61
1211	16.71	143.54	38.62
1211	17.16	143.4	40.28
1211	17.93	143.04	39.85
1211	19.92	140.84	40.38
1211	21.97	137.74	38.33
1211	21.89	137.88	37.63
1215	172.95	7.39	30.6
1215	175.3	7.78	26.81
1215	171.75	6.14	25.21
1219	180.16	37.25	24.66
1219	180.57	37.76	23.87
1219	179.6	38.13	24.9
1222	206.33	88.92	17.88
1222	209.65	84.28	20.29
1225	250.15	64.47	13.03
1225	247.45	59.34	11.07
1228	222.3	97.52	14.28
1228	221.3	95.95	8.48
1243	50.67	136.55	8.51
1243	51.96	136.53	6.34
1243	51.89	136.19	6.54
1243	51.37	136.65	6.22
1243	51.46	136.95	6.83
1243	50.34	136.55	5.74
1243	51.36	137.64	8.93
1243	52.71	137.42	9.27
1243	51.28	136.18	7.12
1243	52.05	135.87	9.32
1243	52.23	136.58	8.99
1243	51.84	136.72	9.58
1243	52.09	136.65	10.5
1243	51.94	137.48	8.74
1249	102.13	8.17	19.53
1249	103.26	6.71	15.15
1249	102.74	7.27	18.01
1249	103.08	7.3	17.82
1249	102.25	8.22	16.75
1255	208.97	95.71	14.53
1255	205.32	90.83	12.63
1255	203.92	85.59	12.24
1255	204.26	92.83	12.22
1255	197.26	93.01	12.3
1349	154.38	115.67	7.84
1349	156.35	115.48	11.84
1349	155.6	116.01	17.16
1349	154.11	115.58	17.12
1349	154.91	114.84	19.95
1349	154.31	114.94	16.96
1349	153.65	114.8	12.63
1349	153.97	115	13.37
1349	153.28	115.6	18
1349	151.54	115.86	18.32
1349	151.95	115.89	14.36
1349	151.28	115.83	15.18
1349	150.73	115.97	16.11
1349	151.76	115.14	15.86
1349	151.34	115.13	16.87
1349	151.89	115.21	16.98
1349	152.37	116.26	13.82
1349	151.8	115.81	16.42
1349	151.46	116.03	16.59
1349	151.71	116.38	15.79
1349	149.3	116.68	18.3
1349	152.26	115.99	16.4
1349	150.37	118.46	16.6
1349	147.69	121.83	19.9
1349	143.97	122.29	21.96
1349	144.19	122.76	20.94
1349	141.14	121.59	21.87
1349	139.33	121.72	20.1
1349	136.44	119.42	19.81
1349	136.66	118.17	19.55
1349	136.36	117.87	18.24
1349	136.59	118.38	19.61
1349	136.11	118.56	18.03
1349	134.72	116.16	19.45
1349	132.63	115.08	18.5
1349	133.27	113.87	17.15
1349	132.91	113.29	17.45
1349	132.72	112.72	17.45
1349	132.41	113.17	17.49
1349	133.07	112.96	17.53
1349	133	113.18	16.8
1349	132.96	112.65	19.99
1349	131.72	112.67	17.6
1349	131.41	112.27	17.84
1349	132.35	111.07	20.15
1349	131.4	111.98	17.11
1349	130.15	113.18	19.95
1349	129.25	114.78	18.5
1349	126.27	115.22	17.1
1349	124.2	116.37	14.27
1349	119.96	117.27	15.33
1349	119.39	117.49	13.75
1349	118.73	121.21	14.82
1349	117.89	122.06	16.06
1349	117.98	121.4	13.85
1349	116.59	121.98	12.94
1349	115.01	122.46	13.11
1349	114.47	121.92	12.66
1349	114.84	120.31	11.57
1349	115.48	120.4	13.96
1349	115.49	120.14	11.98
1349	115.36	119.62	11.3
1349	115.39	119.39	12.44
1349	115.18	120.5	13.09
1349	114.88	120.3	12.9
1349	112.35	119.32	12.58
1349	111.48	118.94	13.14
1349	113.53	118.79	12.15
1349	113.06	119.93	14.28
1349	113.19	120.27	12.88
1349	111	120.72	12.57
1349	110.46	121.57	13.04
1349	110.09	121.07	14.08
1349	108.71	120.96	14.69
1349	108.35	119.85	16.75
1349	107.68	121.23	19.16
1349	106.88	121.44	19
1349	107.21	121.43	21.52
1349	105.8	121.34	22.73
1349	105.88	122.19	22.02
1349	105.92	121.53	21.43
1349	106.06	121.8	25.32
1349	106.54	123.42	26.02
1349	106.16	121.76	24.73
1349	106.98	123.22	26.15
1349	104.27	122.49	23.78
1349	105.9	121.98	26.53
1349	105.27	122.86	24.94
1349	105.73	122.43	26.52
1349	104.97	123.01	24.83
1349	105.92	122.69	25.87
1349	104.67	122.7	20.23
1349	103.65	122.66	27.14
1353	149.33	237.91	25.99
1353	147.73	236.98	27.36
1353	147.89	237.66	25.19
1356	247.68	69.14	12.98
1356	250.09	65.03	19.3
1359	2.98	20.67	10.38
1359	4.16	17.28	11.48
1363	226.01	98.96	25.31
1363	228.95	101.35	20.95
1363	231.14	95.8	18.93
1366	68.25	190.98	15.67
1366	70.3	192.14	13.88
1370	185.91	93.21	17.14
1370	184.98	89.55	18.78
1370	182.86	88.92	26.15
1373	205.33	74.54	19.82
1373	208.35	78.35	15.67
1376	203.6	79.59	12.94
1376	200.6	75.88	13.03
1379	250.19	251.81	34.26
1379	249.53	251.1	33.83
1382	247.38	35.25	22.83
1382	243.27	34.56	24.67
1392	80.05	198.07	35.99
1392	80.9	196.5	37.89
1392	82.69	195.06	39.03
1392	87.16	197.82	38.23
1392	87.65	197.8	35.07
1392	88.17	196.55	37.21
1392	93.44	193.22	39.77
1392	94.61	193.81	34.84
1392	97.9	198.96	38.78
1401	140.6	81.26	6.52
1401	140.62	81.5	7.61
1401	140.6	81.92	6.95
1401	141.56	82.74	10.14
1401	140.32	81.06	5.99
1401	141.05	81.8	6.39
1401	141.12	81.73	8.15
1401	140.66	80.11	11.97
1410	2.16	121.54	8.22
1410	2	120.43	5.11
1410	2.63	121.7	7.8
1410	2.24	120.63	6.71
1410	2.52	120.33	6.86
1410	2.42	120.94	5.04
1410	2.05	120.45	6.81
1410	1.99	120.25	5.83
1417	188.64	191.22	15.89
1417	189.87	192.31	17.6
1417	189.49	190.58	11.15
1417	189.99	190.81	9.31
1417	193.09	190.04	13.84
1417	194.01	192.3	13.72
1422	108.82	57.15	19.04
1422	105.14	56.19	19.21
1422	105.48	56.21	20.84
1422	102.98	55.79	21.18
1426	232.8	60.06	13.89
1426	237.36	60.81	19.26
1426	240.43	54.25	19.03
1429	1.07	102.38	29.2
1429	0.922	101.62	21.82
1433	211.24	88.24	24.2
1433	209.92	93.74	25.2
1433	217.6	93.05	27.18
1436	235.48	72.06	13.88
1436	240.12	73.79	17.38
1439	217.82	94.85	16.23
1439	214.62	91.88	18.29
1449	249.59	3.03	25.52
1449	247.29	3.66	26.88
1449	246.15	2.63	29.12
1449	244.01	4.31	26.53
1449	240.53	5.61	27.19
1449	238.59	6	25.27
1449	237.01	6.39	24.99
1449	234.35	8.98	22.77
1449	232.77	9.58	24.71
1452	236.84	40.17	24.21
1452	233.94	35.44	29.1
1457	7.89	74.52	25.35
1457	5.65	74.08	29.15
1457	3.2	72.73	32.25
1457	2.25	72.4	35.04
1460	193.55	81.75	12.04
1460	195.8	75	14.77
1463	163.05	112.08	6.62
1463	157.29	111.94	8.03
1472	250.7	90.15	26.13
1472	251.39	89.29	20.73
1472	251.13	88.57	24.97
1472	251.73	89.45	23.88
1472	251.19	89.21	20.94
1472	251.34	89.08	24.8
1472	251.46	88.92	23.85
1472	251.09	88.19	28.8
1476	198.24	92.33	15.74
1476	204.27	87.82	15.09
1476	199.4	85.8	15.77
1479	240.01	63.37	31.88
1479	240.94	64.96	26.42
1497	251.23	252.68	31.34
1497	251.25	252.38	30.11
1497	251.16	252.41	33.17
1497	251.53	252.26	31.99
1497	250.85	252.04	34.61
1497	251.55	252.34	33.93
1497	251.68	252.13	32.74
1497	250.81	251.95	33.02
1497	250.62	252.21	34.56
1497	250.17	251.8	33.01
1497	249.41	251.38	34.3
1497	249.13	251.04	34.68
1497	248.47	249.92	34.7
1497	248.82	250.98	35.33
1497	250.09	251.94	34.84
1497	249.6	250.34	35.43
1497	249.77	251.35	33.19
1523	27.61	54.55	30.67
1523	30.07	53.75	28.35
1523	29.51	52.93	23.74
1523	30.81	52.16	23.72
1523	31.9	51.13	21.06
1523	33.74	50.97	19.4
1523	33.83	51.45	20.76
1523	33.54	51.25	16.87
1523	34.28	50.98	15.43
1523	33.87	50.72	16.96
1523	33.29	50.43	18.98
1523	34.88	49.37	14.55
1523	32.9	50.22	18.19
1523	32.6	51.98	19.23
1523	30.36	51.76	21.67
1523	33.48	51.62	18.05
1523	36.62	51.42	16.37
1523	34.82	52.1	19.12
1523	37.53	51.5	17.74
1523	38.74	50.78	18.43
1523	34.9	51.85	19.44
1523	37.47	51.23	16
1523	35.64	52.02	20
1523	34.54	52.75	18.11
1523	37.01	51.44	20.45
1526	250.7	56.36	15.47
1526	248.65	59.05	17.55
1536	30.03	228.7	22.97
1536	33.29	228.65	17.64
1536	33.28	226.33	18.17
1536	34.57	225.24	17.53
1536	36.27	224.54	19.57
1536	37.61	223.11	21.29
1536	37.49	222.89	23.08
1536	37.45	222.77	22.58
1536	37.33	222.76	21.55
1539	247.73	72.95	18.35
1539	243.76	69.52	19.74
1543	148.72	240.17	28.49
1543	148.63	238.92	28.74
1543	148.42	239.28	27.16
1547	186.54	101.1	17.13
1547	186.86	102.54	22.79
1547	187.69	103.2	21.73
1551	79.15	11.56	36.03
1551	78.23	10.03	36.36
1551	76.79	8.91	35.74
1555	214.97	85.05	13.22
1555	211.95	81.39	13.31
1555	212.1	83.26	17.56
1596	2.35	74.17	19.54
1596	1.92	73.22	18.25
1596	2.31	72.82	14.13
1596	2.5	73.19	17.41
1596	2.68	73.69	16.82
1596	3.12	75.38	15.23
1596	2.47	74.85	15.19
1596	3.25	74.83	16.02
1596	2.5	74.91	12.87
1596	3.34	75.24	14.46
1596	2.65	75.7	12.19
1596	3.16	76.72	12.03
1596	2.97	77.68	11.29
1596	4.14	79.45	9.24
1596	4.54	80.16	8.04
1596	5.37	80.17	9.13
1596	6.64	82.26	8.12
1596	7.37	83.04	7.52
1596	8.21	83.13	10.71
1596	9.62	86.88	8.51
1596	9.45	89.61	7.95
1596	8.93	92.2	9.9
1596	9.32	92.82	10.52
1596	9.17	94.09	8.18
1596	8.23	94.26	11.05
1596	7.51	94.89	10.19
1596	8.59	93.62	9.71
1596	6.83	94.08	12.28
1596	6.73	94.45	14.21
1596	5.94	95.31	13.75
1596	6.18	95.69	13.06
1596	5.75	96.2	14.18
1596	7.5	93.86	8.82
1596	6.04	95.5	12.46
1596	5.79	95.86	11.17
1596	4.73	96.21	12.11
1596	6.18	93.54	10.57
1596	4.96	95.41	13.76
1596	6.04	94.7	12.73
1596	9.07	91.11	11.12
1602	3.46	17.62	9.55
1602	2.32	19.5	7.77
1602	3.73	18.39	13.44
1602	4.54	20.35	10.88
1602	2.21	19.39	10.08
1607	198.71	85.65	21.53
1607	197.44	84.5	15.26
1607	202.2	86.63	15.3
1607	200.92	80.11	16.47
1612	236.25	74.12	15.67
1612	240.42	77.5	11.05
1612	242.77	84.81	9.93
1612	236.4	87.82	10.39
1622	78.18	212.69	12.87
1622	81.66	214.95	10.16
1622	83.37	212.83	9.88
1622	80.62	216.2	13.56
1622	80.44	211.44	9.3
1622	82.37	212.39	10.97
1622	82.39	214	9.4
1622	83.92	214.97	13.74
1622	84.71	215.18	12.56
1625	164.34	128.07	30.67
1625	163.89	128.45	31.55
1628	236.56	68.29	18.29
1628	230.53	65.27	15.71
1652	11.62	57.47	6.82
1652	11.56	58.09	7.28
1652	9.91	59.03	9.41
1652	10.03	58.41	7.41
1652	9.3	58.15	5.54
1652	8.52	58.49	9.46
1652	8.17	58.23	7.56
1652	7.44	59.01	7.38
1652	7.43	59.66	8.26
1652	6.12	60.45	7.93
1652	5.6	61.62	6.22
1652	5.71	62.89	6.46
1652	5.69	64.43	9.24
1652	6.56	67.14	8.47
1652	5.54	70.38	13.65
1652	5.15	72.2	12.15
1652	5.59	72.41	9.69
1652	8.17	74.57	11
1652	10.02	78.93	7.91
1652	13.13	80.01	12.78
1652	13.7	80.25	15.16
1652	13.88	81.43	14.37
1652	13.23	81.75	14.85
1659	19.16	224.71	34.11
1659	16.56	226.24	34.15
1659	14.16	226.85	34.67
1659	14.77	226.5	33.84
1659	14.27	225.93	34.44
1659	10.96	227.96	34.03
1662	241.23	58.57	17.96
1662	246.29	58.55	11.84
1666	224.11	96.58	7.82
1666	223.88	100.3	6.07
1666	225.72	105.72	8.15
1669	250.98	61.32	22.8
1669	246.26	64.11	18.26
1672	166.51	115.02	7.41
1672	164.25	113.69	4.89
1675	57.17	234.85	24.41
1675	55.41	236.38	20.48
1678	236.38	36.58	10.14
1678	235.86	39.1	17.15
1683	24	238.76	11.84
1683	24.37	238.87	12.75
1683	24.41	238.71	12.04
1683	24.56	238.01	13.2
1687	188.9	100.97	15.12
1687	186.37	102.98	20.95
1687	185.39	102.99	26.23
1690	244.54	65.51	24.34
1690	244.97	61.74	18.79
1693	198.47	93.16	9.75
1693	195.85	96.83	13.54
1696	205.92	75.06	11.93
1696	202.8	73.98	8.32
1699	180.52	83.87	21.11
1699	183.47	79.48	17.2
1703	1.04	124.94	9.1
1703	1.06	126.62	8.35
1703	1.65	123.33	7.79
1707	16.6	73.32	36.04
1707	16.92	73.24	33.88
1707	16.89	73.35	32.46
1713	78.11	198.32	31.58
1713	77.3	202.09	32.54
1713	76.06	200.26	31.79
1713	76.29	198.04	34.3
1713	77.32	201.85	31.96
1716	188.08	89.52	15.28
1716	185.34	91.75	12.77
1727	15.54	127.52	12.9
1727	15.62	126.96	13.85
1727	17.52	123.06	13.22
1727	16.12	122.4	11.31
1727	16	122.32	13.91
1727	15.23	121.83	11.62
1727	15.72	122.89	12.45
1727	15.77	122.35	12.4
1727	15.53	122.25	12
1727	15.97	122.89	10.36
1732	51.81	37.55	29.28
1732	52.66	37.32	24.02
1732	53.35	38.32	21.15
1732	53.75	37.18	26.36
1735	235.49	60.41	11.38
1735	232.63	55.46	13.68
1738	60.84	77.9	10.1
1738	60.61	77.66	9.88
1741	141.23	80.82	5.41
1741	139.97	80.31	7.93
1747	180.4	205.83	6.04
1747	181.5	205.74	4.15
1747	181.54	203.27	5.29
1747	181.83	204.55	7.78
1747	182.99	200.56	3.73
1751	247.48	56.74	23.87
1751	247.94	53.44	17.29
1751	249.16	52.01	19.03
1755	114.3	205.92	35.1
1755	115.4	205.66	30.45
1755	115.35	205.11	32.1
1758	244.66	34.02	22.71
1758	244.76	36.84	27.33
1763	33.83	238.53	19.2
1763	33.3	237.87	18.13
1763	30.22	237.53	16.1
1763	31.85	234.53	17.05
1777	169.52	25.8	35.98
1777	169.85	26.07	36.48
1777	168.63	26.26	36.34
1777	167.84	26.42	35.51
1777	167.41	26.17	34.67
1777	167	28.42	31.56
1777	166.91	26.81	33.75
1777	165.88	27.98	33.23
1777	167.31	28.47	32.13
1777	162.2	30.21	29.25
1777	159.69	28.98	25.34
1777	156.87	30.75	25.23
1777	157.37	30.11	25.57
1781	203.2	192.08	15.75
1781	202.69	190.25	12.89
1781	202.35	190.87	17.47
1787	29.14	225.17	32.24
1787	26.67	223.3	35.01
1787	26.96	224.01	33.05
1787	24.75	224.76	35
1787	23.06	224.8	35.36
1790	186.11	106.42	23.99
1790	185.51	104.84	21.58
1793	2.94	124.53	10.59
1793	2.06	124.59	9.04
1805	241.34	87.7	26.16
1805	240.39	87.07	22.03
1805	242.12	88.58	22.24
1805	243.87	87.17	21.77
1805	242.87	87.91	19.79
1805	242.18	87.06	17.98
1805	242.58	87.75	20.65
1805	243.27	87.02	24.55
1805	243.84	87.46	23.85
1805	244.28	87.16	20.48
1805	244.54	88.14	16.79
1811	163.15	123.5	21.08
1811	166.86	123.17	21.26
1811	166.18	124.84	26.93
1811	167.12	124.3	23.9
1811	166.61	125.69	29.78
1815	241.34	57.3	18.32
1815	246.91	53.48	16.96
1815	251.14	56.34	15.4
1829	141.36	81.67	7.86
1829	141.73	81.46	7.84
1829	142.64	80.63	8.32
1829	141.16	81.31	7.13
1829	142.47	81.15	10.08
1829	141.43	82.8	8.08
1829	141.39	83.45	9.38
1829	140.29	82.61	10.38
1829	141.57	80.85	6.47
1829	141.14	79.72	8.97
1829	140.4	81.43	7.56
1829	141.57	81.05	6.4
1829	140.2	81.67	10.71
1931	59.05	119.81	5.99
1931	59.56	119.86	4.52
1931	58.87	119.71	6.05
1931	58.88	120.08	5.17
1931	58.6	120.15	4.84
1931	58.52	120.62	5.02
1931	58.54	119.82	5.38
1931	58.8	121.05	6.07
1931	58.19	120.08	4
1931	58.24	121.36	6.61
1931	57.88	121.07	4.68
1931	58.39	121.68	7.36
1931	58.1	120.33	5.79
1931	59.42	121.6	4.24
1931	58.39	120.71	7
1931	59.29	121.3	4.62
1931	59.05	121.41	6.84
1931	59.23	120.71	4.29
1931	59.08	121.01	5.41
1931	58.78	120.85	7.08
1931	58.34	121.25	6.46
1931	58.11	120.49	5.75
1931	58.96	120.16	6.2
1931	58.2	120.42	5.71
1931	59.22	120.54	8.1
1931	58.72	121.06	6.95
1931	58.21	121	5.86
1931	57.75	121.12	5.85
1931	57.76	121.33	6.6
1931	58.15	121	5.11
1931	58.21	120.77	4.79
1931	57.57	120.03	5.16
1931	58.02	120.65	5.13
1931	57.74	121.18	4.75
1931	57.38	121.6	6.72
1931	57	120.35	4.51
1931	57.6	121.05	5.31
1931	57.41	120.58	4.82
1931	57.26	120.37	6.86
1931	57.66	120.74	4.76
1931	58.18	121.59	5.69
1931	57.91	121.82	5.81
1931	58.22	122.33	6.95
1931	58.04	121.52	5.08
1931	57.23	120.96	5.62
1931	57.29	120.88	5.01
1931	58.33	121.38	6.67
1931	58.55	121.82	8.98
1931	58.9	121.58	6.45
1931	58.6	121.25	4.81
1931	59.66	121.84	5.89
1931	58.85	120.72	5.43
1931	59.23	121.88	5.64
1931	58.81	121.84	3.48
1931	59.75	122.91	6.18
1931	58.66	121.7	6.35
1931	59.8	122.71	7.61
1931	60	122.38	5.59
1931	59.75	123.14	6.09
1931	59.3	121.92	6.35
1931	59.58	122.17	5.55
1931	59.23	122.54	6.8
1931	59.53	122.66	6.3
1931	60.2	123.69	8.73
1931	60.04	123.19	6.24
1931	60.84	124.32	7.41
1931	60.62	124.88	11.22
1931	60.95	123.64	7.7
1931	60.7	122.82	9.18
1931	60.52	123.11	8.54
1931	60.67	123.47	5.59
1931	61.26	123.54	7.49
1931	61.01	123.74	6.11
1931	59.47	123.06	6.43
1931	60.28	123.12	7.24
1931	59.91	123.9	5.96
1931	60.95	124.28	5
1931	60.88	124.28	7.72
1931	60.5	123	6.07
1931	60.58	122.33	9.69
1931	59.32	123.49	6.73
1931	60.49	123.82	5.69
1931	61.29	123.84	6.56
1931	61.28	124.59	4.1
1931	61.49	124.93	5.54
1931	60.94	124.47	5.54
1931	60.42	124.11	7.14
1931	61.11	124.59	6.61
1931	61.47	124.27	6.56
1931	61.05	125.01	7.87
1931	60.98	124.17	4.41
1931	61.34	124.65	7.45
1931	62.2	125.24	9.69
1931	62.58	125.53	5.36
1931	62.58	125.93	5.02
1931	62.65	125.77	6.32
1931	61.19	125.65	3.95
1931	62.15	124.72	6.95
1931	60.54	124.53	7.73
1931	62.72	125.78	3.58
1931	63.07	125.98	3.17
1937	23.93	239.46	11.06
1937	23.62	239.16	11.39
1937	23.23	239.43	12.07
1937	23.21	239.59	12.6
1937	24.39	239.52	12.35
1942	237.68	34.56	35.24
1942	234.36	31.51	30.35
1942	238.48	32.35	31.3
1942	237.27	39.22	34.08
2038	72.4	204.84	6.01
2038	72.43	205.94	6.07
2038	72.58	204.54	5.25
2038	71.53	203.46	5.85
2038	72.04	203.17	6.89
2038	71.5	203.52	6.44
2038	72.1	202.67	4.38
2038	72.75	202.23	5.22
2038	71.95	202.57	4.68
2038	71.47	202.75	5.54
2038	72.32	204.06	7.58
2038	70.25	206.13	8.81
2038	70.44	206.27	9.21
2038	72.54	202.99	5.08
2038	72.04	203.15	6.68
2038	71.47	204.39	9.22
2038	73.29	202.38	5.95
2038	73.11	201.18	6.12
2038	72.44	203.91	8.85
2038	73.03	202.51	7.63
2038	72.76	201.93	7.45
2038	73.03	201.44	5.82
2038	72.06	203.87	9.14
2038	72.76	201.17	4.67
2038	73.18	201.47	5.13
2038	72.85	201.2	4.96
2038	72.69	202.03	4.11
2038	72.74	203.27	5.52
2038	72.42	201.89	4.46
2038	72	201.48	4.34
2038	72.51	200.81	5.22
2038	72.48	200.72	5.79
2038	72.9	200.93	5.4
2038	72.9	200.59	5.56
2038	72.71	201.45	5.3
2038	72.38	200.86	5.02
2038	72.86	200.8	5.43
2038	71.82	201.8	6.36
2038	71.7	201.04	5.86
2038	72.36	202.08	6.07
2038	72.91	201.09	6.54
2038	73.73	200.96	6.25
2038	73.52	201.55	5.71
2038	73.05	202.08	5.84
2038	73.67	201.54	5.18
2038	73.25	201.54	5.57
2038	68.88	201.11	11.04
2038	69.71	201	9.13
2038	71.3	201.23	10.24
2038	71.06	200.92	9.64
2038	71.92	201.06	9.15
2038	72.2	200.45	7.76
2038	72.63	200.26	8.18
2038	73.17	199.65	6.96
2038	73.47	199.78	8.04
2038	73.77	200.35	7.31
2038	73.63	200.63	8.01
2038	74.17	200.51	8.42
2038	74.79	199.5	8.47
2038	74.83	199.35	8.78
2038	75.06	199.42	9.26
2038	74.96	198.86	10.48
2038	77.14	199.77	14.69
2038	75.04	198.69	10.41
2038	75.08	199.01	11
2038	76.33	199.38	13.01
2038	75.03	198.42	10
2038	74.53	197.41	8.38
2038	74.65	198	8.3
2038	74.67	197.33	8.13
2038	74.46	198.02	8.54
2038	74.69	198.36	10.44
2038	74.65	198.33	11.4
2038	74.33	199.35	12.89
2038	74.37	200.64	16.33
2038	73.99	200.48	13.96
2038	73.4	199.29	13.12
2038	73.4	202.12	15.23
2038	74.56	204.09	17.39
2038	75.66	203.2	18.25
2038	75.86	203.19	19.59
2038	75.5	203.23	18.84
2038	75.78	202.5	21.04
2038	76.31	202.02	24.03
2038	75.16	202.43	21.88
2038	75.49	201.75	20.8
2038	76.15	201.61	20.18
2038	76.8	201.98	20.81
2038	76.96	203.04	21.36
2038	77.28	203.94	19.6
2038	78.25	204.64	20.16
2038	77.53	204.01	24.03
2038	77.52	204.45	20
2038	78.07	205.93	18.23
2038	77.77	206	20.3
2049	70.35	149.3	25.26
2049	69.84	149.12	28.3
2049	69.44	151.43	26.26
2049	69.78	152.22	24.67
2049	68.53	154.66	24.69
2049	68.6	156.4	27.17
2049	67.77	156.41	26.1
2049	67.52	157.68	27.17
2049	68.17	159.8	33.03
2049	68.1	159.67	26.98
2083	31.42	216.23	15.91
2083	32.8	221.1	15.96
2083	34.65	224.51	15.32
2083	35.46	225.07	15.59
2083	37.78	226.49	15.24
2083	38.97	227.79	16.76
2083	40.7	229	16.1
2083	40.68	228.89	17.9
2083	38.22	228.24	16.88
2083	37.07	228.4	18.22
2083	36.28	228.44	17.91
2083	35.06	228.54	16.56
2083	34.25	229.97	17.57
2083	33.82	230.33	18.36
2083	34.7	229.47	19.35
2083	35.23	229.08	17.27
2083	34.45	228.35	16.79
2083	34.34	229.38	19.15
2083	33.5	229.75	18.85
2083	34.36	230.31	20.98
2083	35	229.96	20.01
2083	34.73	230.43	19.99
2083	33.77	229.92	22.37
2083	34.35	230.16	24.42
2083	35.06	229.8	24.24
2083	34.3	229.38	21.4
2083	34.86	229.72	22.2
2083	35.63	230.58	23.57
2083	35.27	231.62	25.05
2083	35.58	232.9	26.17
2083	38.66	233.33	27.5
2083	42.33	229.97	33.17
2083	41.34	229.97	31.92
2092	12.83	73.95	31.13
2092	14.4	72.16	24.18
2092	10.31	74.79	28.61
2092	7.73	75.28	25.85
2092	5.97	75.87	28.66
2092	5.05	76.71	26.52
2092	3.54	75.73	25.96
2092	3.02	75.38	24.96
2097	213.13	139.67	12.61
2097	212.81	139.53	15.15
2097	214.61	139.92	12.66
2097	213.3	139.05	13.1
2105	72.02	226.72	16.04
2105	71.84	224.95	13.74
2105	71.7	225.31	13.38
2105	71.22	223.56	15.45
2105	71.07	222.45	13.61
2105	70.92	222.22	13.41
2105	71.09	220.25	14.09
2110	12.02	107.89	7.82
2110	12	107.97	6.01
2110	10.99	107.63	8.22
2110	11.63	108.67	7.85
2113	193.7	187.04	22.47
2113	196.14	187.97	19.44
2117	142.91	249.26	27.65
2117	142.64	249.33	26.87
2117	141.29	248.69	29.1
2120	235.06	73.07	15.67
2120	235.43	70.02	9.43
2164	45.35	88.86	34.22
2164	45.1	87.53	33.87
2164	45.79	87.09	32.82
2164	45.7	87.16	33.55
2164	43.19	85.99	33.56
2164	40.73	84.36	31.7
2164	41.52	84.95	31.99
2164	40.43	84.48	33
2164	38.88	83.28	32.66
2164	36.69	82.87	33.69
2164	35.4	81.19	34.52
2164	34.67	80.99	35.56
2164	35.75	81.68	31.26
2164	35.36	81.37	33.35
2164	34.64	81.84	30.95
2164	34.73	81.59	33.29
2164	35.23	81.7	32.31
2164	34.16	79.64	32.84
2164	35.88	81.67	28.48
2164	34.41	79.74	33.51
2164	37.28	82.14	29.24
2164	36.42	82.89	30.92
2164	37.68	83.67	30.08
2164	38.38	83.86	31.41
2164	38.31	83.18	30.93
2164	38.34	83.26	29.46
2164	37.65	82.73	28.58
2164	38.98	83.06	28.42
2164	38.6	83.19	30.85
2164	38.82	83.39	31.06
2164	40.62	84.68	32.42
2164	36.65	81.76	30.35
2164	35.99	81.9	31.01
2164	41.12	83.67	32.49
2164	40.37	83.33	32.96
2164	41.67	82.64	32.82
2164	40.5	83.35	31.98
2164	41.25	83.12	31.49
2164	42.54	81.6	32.59
2164	42.31	81.55	31.87
2164	41.32	81.87	31.82
2164	41.95	81.71	32.43
2164	44.34	81.11	31.94
2168	19.17	84.52	33.23
2168	20.55	85.04	35
2168	18.17	85.46	39.27
2171	50.55	136.54	7.67
2171	51.34	136.85	5.35
2183	216.25	30.65	7.13
2183	217.22	29.18	9.76
2183	217.27	29.1	9.45
2183	216.51	29.58	9.01
2183	216.19	30.12	6.53
2183	216.99	30.5	9.27
2183	216.57	30.25	8.36
2183	216.54	30.65	7.16
2183	216.07	30.18	5.55
2183	218.17	30.03	5.25
2183	218.32	29.08	8.79
[truncated: 3,446 more rows]

## Sheet: 2B
WT PTCRA-EGFP mice
Track Velocity of pDCs (μm/min)		Displacement Rate of pDCs (μm/min)
WT Naïve	WT PyYM	WT Naïve	WT PyYM
4.206	1.116	0.1914	0.0324
4.152	1.518	0.261	0.102
6.18	1.62	0.3126	0.1608
3.042	1.764	0.0852	0.2556
5.922	2.226	0.5016	0.2388
4.962	2.07	1.374	0.696
5.874	1.32	0.636	0.3108
9.12	2.148	3.558	0.1158
6.42	1.968	1.56	0.1986
5.232	1.476	0.45	0.04842
7.32	3.312	2.736	0.4524
8.16	1.782	2.118	0.1698
6.54	1.842	1.14	0.0834
7.38	2.262	0.4968	0.2922
5.484	2.238	1.626	0.2802
4.326	1.05	1.14	0.327
3.342	2.406	0.4758	0.0936
8.04	1.932	1.422	0.147
7.68	1.92	1.206	0.972
5.802	2.892	2.298	0.702
10.26	2.364	0.96	0.696
6.06	2.094	1.566	0.549
5.112		0.4194
8.46	6.42	1.866	0.1416
11.22	7.02	2.664	0.63
6.48	8.22	0.429	1.446
4.638	6.78	0.5862	0.2448
6.66	8.46	0.768	2.022
9.48	4.68	3.792	1.8
5.532	3.42	0.66	0.0642
8.58	4.674	5.352	0.1746
5.922	5.388	0.846	0.2112
3.456	5.19	0.858	0.864
5.532	5.868	0.2262	0.726
8.22	6.18	0.918	0.084
8.58	9	3.234	3.894
6.06	3.402	0.768	0.1164
6.12	5.058	1.734	1.458
6.3	3.81	0.612	0.3468
6.42	4.56	1.05	0.3234
9.06	6.84	2.058	2.442
6.9	7.38	2.808	0.5676
7.98	4.236	1.056	0.744
6.72	7.38	0.678	0.822
6.48	5.28	2.25	0.05868
7.02	5.808	1.194	2.208
3.672	6.6	0.1698	0.798
6.96	4.458	1.212	0.1836
4.128		0.165
6.3	4.008	2.532	1.752
4.434	2.304	0.1896	0.774
6.36	8.4	0.4644	1.176
7.32	4.32	2.994	2.112
7.56	6.3	1.83	2.82
11.04	7.44	5.064	1.686
4.65	3.888	0.4602	0.4218
10.44	8.28	0.876	1.596
7.26	7.68	1.062	1.386
6.96	4.656	0.576	2.844
6.06	3.738	2.766	0.69
3.324	4.092	1.224	0.966
4.596	6.84	0.972	1.404
7.74	3.876	2.112	0.2802
3.81	3.51	0.282	0.2364
5.34	7.44	1.416	1.248
5.082	3.846	0.642	0.1998
9.72	4.248	6.12	1.002
5.97	1.41	1.482	0.2706
8.94	4.8	4.302	0.636
5.334	3.9	1.002	0.525
6.54	5.358	4.2	1.512
7.56	3.18	1.53	0.1518
4.932	3.174	1.602	0.372
13.62	3.876	1.836	0.1314
4.542	4.764	0.5268	0.2538
10.02	5.454	0.774	1.29
4.53	8.4	0.3384	1.05
9.54	5.826	2.7	0.4362
8.82	4.47	1.074	0.354
6.96	2.604	0.876	0.327
8.16	3.36	2.94	0.255
12.18	4.656	3.984	0.5562
6.36	8.4	0.852	0.6
7.62	7.68	1.56	0.642
7.38	3.132	2.124	0.612
6.9	3.69	1.614	0.1806
8.88	5.172	2.424	0.4566
14.7	3.222	4.566	0.0756
5.526	5.346	0.924	0.5172
5.928	7.62	2.22	0.3432
9.18	4.782	3.654	0.3498
7.74	4.236	2.394	0.1266
14.88	4.938	2.4	0.1992
15.54	4.068	5.37	0.05196
7.92		1.608
7.14	3.192	0.2706	1.182
9.06	6.48	3.294	0.762
6.24	6.96	3.426	5.124
4.44	4.602	0.5286	1.116
6.48	3.666	2.844	1.65
7.38	3.654	3.54	1.164
13.5	3.762	4.716	0.984
7.26	6.24	2.4	2.406
8.16	5.712	2.322	2.04
6.9	3.612	1.134	0.822
7.02	4.428	3.294	1.488
4.014	7.44	1.092	0.954
5.556	3.384	1.752	1.17
7.02	3.936	1.158	1.62
7.2	6.96	2.814	1.878
9.48	6.18	2.55	0.3138
5.496	5.952	1.17	1.182
7.26	6.66	0.966	1.362
12	6.9	5.616	0.876
7.98	4.434	1.344	1.5
11.76	5.862	1.752	2.31
5.466	6.48	0.4716	1.92
2.838	9.66	0.447	0.816
6.6	3.582	2.85	0.852
5.832	5.994	1.26	2.766
7.74	9.18	0.876	3.984
7.8		2.376
10.98	3.75	3.756	0.1224
5.916	2.382	1.254	0.1356
5.4	2.34	1.77	0.1266
6.72	3.588	2.796	0.1902
7.02	2.838	1.542	0.744
4.014	4.626	0.99	0.4752
4.5	2.658	0.471	0.138
5.85	1.986	1.35	0.05376
7.32	4.65	2.484	0.2544
8.52	3.858	3.324	0.63
7.74	8.4	2.484	2.514
	4.32		0.756
4.134	4.908	0.05886	1.734
2.958	7.32	0.0828	0.4986
5.166	4.518	0.1776	0.0828
6.42	4.272	0.726	0.3078
8.1	5.79	0.816	1.194
3.576	5.358	0.3126	0.606
2.73	5.388	0.762	0.4128
5.214	4.662	1.26	0.714
10.26	4.362	4.23	0.2208
5.352	4.8	0.5154	0.078
6	4.11	1.974	0.465
7.38	3.756	0.828	0.279
4.032	3.234	0.5442	0.246
5.298	4.128	0.9	0.4188
3.234	5.064	0.948	0.5358
9.3	4.128	1.818	0.972
4.512	7.14	0.2652	0.93
7.68	3.936	1.032	0.0654
7.08	5.574	3.15	3.072
5.538	4.068	1.53	0.774
4.326	4.92	1.242	1.116
8.76	5.196	1.158	1.488
8.28	3.306	1.314	0.684
8.76	2.244	0.768	0.099
5.526	1.926	1.458	0.123
8.7	3.42	1.29	1.626
5.964	5.148	0.708	0.756
7.92	4.068	1.26	0.912
4.578	2.97	1.14	0.3654
9.3	4.218	0.648	0.4272
7.56	3.948	2.214	0.3486
8.4	5.868	4.482	0.3366
5.922	4.464	0.162	0.588
2.238	6.6	0.1932	0.18
7.38	3	1.41	0.321
8.4	3.222	3.312	0.804
5.106	7.44	0.996	0.846
5.19	3.816	0.2988	0.3048
9.84	2.808	1.992	0.555
6.6	3.18	0.666	0.132
9.9	2.856	1.968	0.1626
1.812	2.544	0.1314	0.4632
7.2	2.646	1.014	0.1644
7.92	4.284	0.642	0.2724
3.63	2.73	0.138	0.246
5.49	6.54	0.45	0.4896
11.4	3.378	3.342	0.2226
6.9	5.718	1.302	0.834
5.718	4.944	1.032	0.834
11.52	4.038	4.896	0.678
6.18	3.24	2.16	0.3084
6.24	3.306	1.23	0.5454
6.18	4.278	0.762	0.654
6.54	5.802	3.582	0.996
8.1	3.054	0.63	0.84
6.9	3.696	0.4266	0.399
6.06	3	0.774	0.252
5.748	5.13	1.518	0.477
7.32	1.944	0.816	0.3744
5.886	3.606	2.112	0.714
6.66	3.084	5.31	0.294
9.6	4.434	0.3354	0.2076
4.98	3.606	0.2784	0.4116
6.42	3.492	3.294	0.3306
6.72	3.216	0.66	0.612
8.46	2.52	0.822	0.72
4.05	6.3	0.846	1.878
9.78		3.432
6.12	4.536	0.4008	0.0834
7.14	4.776	2.16	0.1368
6.96	5.928	2.748	0.672
5.19	5.718	0.3312	2.112
2.742	4.524	0.1206	0.5592
4.824	5.1	0.72	2.286
11.1	5.988	3.414	0.3678
7.08	4.152	0.48	0.1572
9.72	6.42	0.3954	0.528
5.94	10.38	1.572	1.116
8.7	5.13	0.4818	0.3372
5.892	9.36	1.956	1.152
7.26	5.226	1.596	0.3276
10.08	4.62	0.5532	0.3618
5.814	4.38	0.5976	1.098
8.4	6	4.722	0.3888
6.66	7.44	1.5	0.888
6.48	5.946	0.648	0.2286
6.36	5.346	0.3306	1.416
7.44	5.178	0.165	0.852
6.06	8.52	3.114	1.206
6.18	4.374	0.05322	0.1746
6.72	7.68	1.278	0.2862
4.608	3.888	0.1962	0.04908
4.986	5.4	0.3138	0.618
6.78	5.538	2.49	0.894
5.346	5.724	1.59	0.1188
10.98	5.304	5.184	1.134
5.856	4.182	0.762	1.428
5.19	5.232	0.5034	0.612
6.06	5.478	2.364	0.3594
7.38	6.6	0.762	1.308
11.64	6.12	7.14	1.164
7.86	4.98	1.692	0.2226
3.942	5.7	1.686	1.122
6.84	4.314	0.5568	0.2016
6.24	5.022	2.466	0.84
7.02	5.202	4.224	0.357
11.82	5.484	8.7	1.176
6.78	3.282	0.2682	0.1146
5.28	4.806	0.3426	1.506
4.968	5.826	1.776	0.726
	6.54		3.312
5.46	6.12	0.4278	0.84
6.12	5.388	0.33	0.732
3.174	4.932	0.0858	0.3198
6.6	4.698	0.3348	1.038
7.26	4.236	1.002	0.636
4.224	3.18	0.1638	0.2718
8.46	4.422	0.5982	1.41
5.748	4.728	1.224	0.5376
4.686	6.54	0.4158	0.852
7.02	7.32	0.678	1.38
5.886		0.1158
4.866	3.894	0.4902	0.2556
5.274	5.316	0.522	0.708
5.496	5.388	0.306	0.1632
5.316	6.9	0.984	0.642
3.564	6.06	0.3744	0.726
10.8	9.12	2.232	0.5988
12.96	10.2	1.602	0.5976
8.4	4.224	3	1.356
8.04	5.958	1.074	3.294
8.16	5.838	0.5394	0.918
6.42	9.06	0.3336	0.936
8.7	6.36	0.3234	1.308
9.72	4.896	2.754	0.708
7.86	3.924	0.966	1.068
10.68	5.652	0.9	1.062
5.232	6.84	0.606	1.302
7.68	6.42	0.5688	0.87
8.52	4.512	1.32	0.1716
9.06	6.6	1.176	1.176
9.24	7.44	0.5046	1.038
5.112	6.9	0.33	1.296
7.44	8.52	0.786	2.31
5.376	4.17	0.1938	0.3042
10.68	4.464	1.86	0.3984
9.12	5.388	0.84	0.1602
8.28	8.1	1.398	2.76
5.748	6.72	1.02	0.972
6.3	6.3	0.936	0.225
6.66	6.96	0.1116	2.286
7.92	6.18	3.39	0.816
10.56	6.3	0.99	1.932
8.46	5.034	1.956	0.858
5.88	6.3	0.798	0.774
7.74	5.916	2.346	0.2886
5.952	5.076	0.4656	0.03048
6.72	6.06	0.636	1.782
8.04	6.78	3.696	2.298
8.1	7.02	0.4662	0.4596
11.52	4.098	2.1	1.134
10.38	5.478	7.38	0.9
8.88	6.06	1.458	0.2574
6.9	5.982	0.5472	0.612
7.68	8.7	4.878	0.5208
7.14	7.8	1.878	4.992
6.18	9.66	2.016	1.68
9.78	7.56	1.17	0.492
6.9	5.784	2.184	0.4308
10.8	5.412	7.32	0.2994
8.1	7.98	1.896	0.738
7.5	4.308	0.4398	0.3564
4.518	7.74	0.5184	3.162
6.9	8.28	0.918	0.102
5.742	6.3	1.734	0.786
7.26	4.758	3.99	0.1806
10.74	10.74	4.362	0.1116
7.92	5.544	2.196	0.4296
6.6	3.762	1.29	0.4614
4.566	7.32	0.2172	3.528
10.86	5.472	1.122	0.81
7.92	5.814	1.518	1.782
6.84	8.7	0.666	1.014
4.704	5.112	1.59	0.1788
9.06	5.334	2.79	0.3828
11.88	3.636	0.774	0.828
10.2	8.16	5.022	1.194
3.918	6.96	0.3918	2.01
7.8	3.63	1.938	1.356
9.66	8.76	0.618	2.796
9.36	4.26	2.316	0.336
7.98	6.12	3.678	0.912
12.84	4.254	2.772	0.978
5.13	7.08	0.369	0.87
7.74	8.64	1.536	0.4692
9.96	5.784	2.004	1.572
9.18	7.44	0.3978	1.014
6.18	5.892	1.314	0.507
12.18	5.334	1.17	0.984
6.48	6.06	0.888	0.888
9.48	10.08	0.5856	1.584
8.46	5.16	0.606	0.762
10.92	5.028	1.152	1.056
8.64	7.08	4.458	1.398
6.84	6.66	2.226	1.566
	7.26		1.458
	9.72		3.036
	9.66		4.434
	6.84		1.59
	5.73		1.782
	10.08		0.804
	7.2		2.064
	4.602		2.142
	9		1.386

## Sheet: 2C
WT PTCRA-EGFP mice
Track Velocity Average/Mouse		Displacement Rate Average/Mouse
WT Naive	WT PyYM	WT Naive	WT PyYM
7.09	1.969	1.77	0.3147
6.677	5.844	1.499	0.8948
7.712	4.942	1.474	0.7749
	5.574		1.625
	4.14		0.5841
	5.527		0.7927
	6.485		1.152

## Sheet: 2D
(Left Panel)										(Right Panel)
Naive WT				PyYM WT						Slope of Mean Square Displacement (per mouse)
Time (seconds)	Mean	SD	N	Time (seconds)	Mean	SD	N			Naïve WT	PyYM WT
0	0	0	2637	0	0	0	2309			0.3579	0.2073
20	16.668	16.4837	2637	20	7.78629	10.0516	1029			0.3542	0.0542
40	22.9388	29.8121	1563	40	19.6248	18.5481	1828			0.4203	0.1114
60	28.0399	37.8154	1118	60	13.787	18.6615	476				0.18
80	31.6234	41.6986	873	80	27.4863	33.1537	1068				0.103
120	42.7726	64.1016	610	120	20.2282	27.7316	302				0.05349
160	63.0459	106.731	536	160	34.7806	49.5111	301
180	73.5535	112.257	507	180	29.8394	42.8256	342
200	77.913	126.587	333	200	28.5572	43.8029	185
240	95.926	162.876	286	240	37.5142	50.8135	331
260	102.172	176.203	262	260	35.1875	57.1726	137
280	108.257	186.773	247	280	37.8348	58.0493	241
300	113.576	206.943	226	300	36.4924	54.0638	117
320	120.469	223.397	214	320	42.027	63.7847	240

## Sheet: 2E
pTCRAGFP Cd169DTR/WT Infected No DT					pTCRAGFP Cd169DTR/WT Infected With DT					pTCRAGFP -> Cd169DTR/WT Infected No DT					pTCRAGFP -> Cd169DTR/WT Infected With DT
Track ID	Centroid X	Centroid Y	Centroid Z		Track ID	Centroid X	Centroid Y	Centroid Z		Track ID	Centroid X	Centroid Y	Centroid Z		Track ID	Centroid X	Centroid Y	Centroid Z
1000000639	166.424	166.362	234.031		1000000112	61.9621	0	-1080.58		1000000118	68.0944	167.09	-568.138		1000000003	136.965	74.0507	-292.21
1000000639	165.958	165.446	233.299		1000000112	62.8748	0	-1080.34		1000000118	67.9484	167.348	-568.792		1000000003	134.526	76.1632	-292.21
1000000639	165.493	167.356	235.222		1000000112	61.0995	0	-1080.41		1000000118	67.11	167.488	-570.828		1000000003	133.942	75.9643	-292.21
1000000639	165.749	166.244	233.212		1000000112	59.9569	0	-1081.03		1000000118	67.7299	166.939	-570.611		1000000003	134.053	75.8389	-292.21
1000000639	165.963	166.716	231.612		1000000112	60.8442	0	-1080.16		1000000118	67.4655	166.897	-569.234		1000000003	133.636	75.0837	-292.21
1000000639	164.575	167.419	235.789		1000000112	67.9197	0	-1080.3		1000000118	66.8903	167.317	-574.022		1000000003	130.387	74.8849	-288.675
1000000639	165.185	165.505	231.045		1000000112	61.9242	0	-1081.17		1000000118	67.3638	167.045	-572.169		1000000003	126.003	74.5032	-287.585
1000000639	164.961	166.915	232.964		1000000112	61.6813	0	-1080.31		1000000118	67.0986	166.286	-572.514		1000000003	124.862	74.2477	-287.27
1000000639	164.132	166.618	236.163		1000000112	68.3971	0	-1080.69		1000000118	66.7832	166.059	-572.909		1000000003	123.995	74.9631	-287.566
1000000639	163.783	165.939	233.267		1000000112	70.6973	0	-1080.36		1000000118	66.4128	165.977	-573.154		1000000003	122.015	74.054	-287.93
1000000639	164.252	166.74	235.941		1000000112	67.3068	0	-1080.49		1000000118	66.9843	166.362	-572.439		1000000003	120.563	73.7149	-288.21
1000000639	165.527	164.868	234.001		1000000112	68.4006	0	-1080.6		1000000118	67.22	166.572	-572.276		1000000003	119.237	72.6204	-287.901
1000000639	164.893	164.436	233.063		1000000112	68.7682	0	-1080.41		1000000118	66.8333	166.13	-572.578		1000000003	118.446	71.5059	-288.413
1000000639	164.964	166.544	233.345		1000000112	68.4569	0	-1080.37		1000000118	66.8752	165.673	-572.369		1000000003	117.942	70.085	-288.136
1000000639	164.197	165.235	232.023		1000000112	69.0723	0	-1080.27		1000000118	66.0619	165.057	-572.415		1000000003	117.361	69.5367	-287.279
1000000639	164.341	164.956	233.318		1000000112	67.5808	0	-1080.24		1000000118	64.8998	165.262	-572.865		1000000003	117.63	68.6406	-287.615
1000000639	165.326	163.912	232.302		1000000112	67.6366	0	-1080.51		1000000118	64.5536	165.644	-572.691		1000000003	116.723	66.8524	-287.285
1000000639	165.015	165.084	232.671		1000000112	67.0848	0	-1080.51		1000000118	64.9965	165.328	-572.066		1000000003	117.043	67.112	-287.24
1000000639	164.638	166.403	233.132		1000000112	67.9816	0	-1081.1		1000000118	65.0175	164.96	-572.257		1000000003	117.13	66.0852	-287.396
1000000639	164.818	166.106	233.419		1000000112	67.367	0	-1080.58		1000000118	64.3906	164.753	-572.842		1000000003	117.419	64.92	-287.524
1000000639	164.191	165.104	232.962		1000000232	119.535	11.2983	-1080.84		1000000118	64.7445	164.591	-573.25		1000000003	116.881	65.0013	-287.44
1000000639	164.073	166.893	231.933		1000000232	118.735	13.3244	-1081.33		1000000118	64.2479	164.669	-572.804		1000000003	115.764	64.3176	-287.012
1000000639	163.631	166.421	232.649		1000000232	118.332	13.9487	-1081.46		1000000118	63.4166	164.815	-573.275		1000000003	116.29	64.2585	-287.091
1000000639	164.483	166.634	233.286		1000000232	118.745	13.5074	-1083.48		1000000118	63.5453	164.514	-573.33		1000000003	114.864	63.9662	-287.095
1000000639	164.388	166.008	233.009		1000000232	119.778	14.0234	-1084.02		1000000118	63.0714	164.563	-572.412		1000000003	114.149	64.7041	-286.775
1000000639	164.328	166.307	234		1000000232	119.733	14.9949	-1081.92		1000000118	63.0227	163.998	-572.319		1000000003	114.637	65.1542	-286.792
1000000639	162.928	166.827	235.809		1000000232	119.797	14.5233	-1084.58		1000000118	62.8576	163.668	-572.473		1000000003	113.696	64.6713	-288.047
1000000639	164.84	165.131	232.405		1000000232	118.848	14.411	-1084.28		1000000118	62.2359	163.788	-574.139		1000000003	112.677	65.0561	-287.086
1000000639	163.947	166.41	232.74		1000000232	117.898	13.9784	-1081.65		1000000118	62.914	163.243	-572.61		1000000003	111.075	63.5821	-286.912
1000000639	162.896	165.098	231.987		1000000232	119.207	13.732	-1084.83		1000000118	62.5402	163.623	-572.864		1000000003	112.506	63.9085	-286.776
1000000639	164.89	165.229	232.58		1000000232	118.248	13.3514	-1084.35		1000000118	61.8694	163.906	-573.47		1000000003	112.279	63.5669	-286.576
1000000639	164.678	165.216	231.84		1000000232	118.337	12.4745	-1083.77		1000000118	61.8006	164.304	-573.264		1000000003	111.053	63.4	-286.911
1000000639	163.894	164.647	232.849		1000000232	117.547	12.8488	-1082.46		1000000118	62.0311	164.621	-572.361		1000000003	105.865	60.3066	-282.95
1000000639	164.033	165.813	232.141		1000000232	117.76	13.0132	-1082.31		1000000118	61.6055	164.235	-572.779		1000000003	105.255	61.317	-282.465
1000000639	164.352	165.754	232.761		1000000232	117.166	14.6179	-1081.74		1000000118	61.3403	164.651	-573.151		1000000003	104.956	61.298	-282.87
1000000639	164.967	165.595	232.888		1000000232	118.547	14.1655	-1083.4		1000000118	61.1871	164.741	-574.232		1000000003	105.956	62.3781	-285.878
1000000639	163.511	165.373	232.672		1000000232	118.476	14.4818	-1085		1000000118	61.2395	164.719	-572.632		1000000003	105.638	62.3019	-286.055
1000000639	164.219	165.394	232.282		1000000232	119.071	14.0774	-1084.4		1000000118	60.796	164.489	-572.186		1000000003	104.736	60.6288	-284.072
1000000639	164.358	165.414	228.197		1000000232	118.915	13.371	-1084.85		1000000118	61.1561	164.378	-572.837		1000000003	104.452	60.2625	-284.163
1000000639	164.297	166.997	231.634		1000000232	118.949	12.0833	-1084.98		1000000118	60.9212	164.128	-572.036		1000000003	102.998	59.4842	-282.207
1000000639	163.265	166.308	235.102		1000000232	119.193	13.0157	-1085.47		1000000118	60.4029	164.055	-572.074		1000000003	102.882	58.8666	-282.572
1000000639	164.53	165.069	232.518		1000000232	118.509	13.1689	-1085.05		1000000118	60.2576	164.205	-572.954		1000000003	102.506	59.9318	-282.376
1000000639	164.207	165.584	232.054		1000000232	119.354	12.2798	-1085.9		1000000118	60.3313	163.889	-573.121		1000000003	101.38	58.9211	-282.349
1000000639	164.308	165.943	231.986		1000000232	119.095	11.9453	-1084.44		1000000118	59.7511	163.443	-573.063		1000000003	100.012	58.0537	-280.818
1000000639	163.018	165.046	231.119		1000000232	118.005	12.0492	-1084.88		1000000118	59.5959	163.825	-572.46		1000000003	97.3591	58.4204	-277.915
1000000639	163.213	166.163	230.744		1000000232	118.41	11.5936	-1085		1000000118	59.4311	163.631	-572.6		1000000003	98.6524	58.3553	-279.279
1000000639	164.356	164.99	230.533		1000000232	118.696	11.2579	-1085.52		1000000118	60.3484	164.347	-572.273		1000000003	97.7963	58.6143	-277.013
1000000639	164.166	165.324	232.064		1000000232	118.663	11.4786	-1084.52		1000000118	59.8151	164.209	-571.851		1000000003	96.7742	59.1928	-277.071
1000000639	163.223	165.879	230.308		1000000232	118.167	11.8222	-1085.1		1000000118	60.0349	164.252	-570.113		1000000003	96.4903	58.7879	-276.651
1000000639	164.71	164.136	226.101		1000000232	117.192	11.7028	-1083.85		1000000118	59.8356	164.371	-571.095		1000000003	95.2587	58.3315	-276.383
1000000639	163.436	165.667	229.683		1000000232	118.991	11.5606	-1085.77		1000000118	59.5337	164.656	-572.586		1000000003	94.9533	59.5806	-276.473
1000000639	163.851	164.758	227.915		1000000232	118.357	11.2491	-1085.3		1000000118	59.9106	164.304	-573.828		1000000003	95.314	59.5277	-275.285
1000000639	163.427	165.161	228.504		1000000232	117.697	11.4899	-1084.85		1000000118	60.1567	163.835	-572.366		1000000003	95.254	58.7996	-276.022
1000000639	164.576	165.663	228.509		1000000232	117.083	11.2125	-1085.65		1000000118	59.6397	164.315	-571.976		1000000003	94.8468	59.0725	-275.564
1000000639	164.279	164.519	227.277		1000000232	116.909	10.5819	-1085.7		1000000118	59.5252	164.261	-571.244		1000000003	94.5967	59.3919	-275.036
1000000639	164.236	165.317	228.043		1000000232	117.459	11.4474	-1084.27		1000000118	59.8393	164.669	-569.901		1000000003	95.1038	58.3796	-275.752
1000000639	162.334	165.312	223.305		1000000232	116.086	12.0032	-1084.38		1000000118	59.5513	164.576	-569.839		1000000003	94.512	59.6529	-276.947
1000000639	163.279	165.021	226.949		1000000232	115.572	11.6919	-1085.3		1000000118	59.1	164.391	-571.559		1000000003	95.305	57.9705	-273.625
1000000639	161.713	166.357	224.141		1000000232	114.077	12.3664	-1085.66		1000000118	58.6539	164.139	-571.776		1000000003	94.6958	58.9722	-275.164
1000000639	163.172	165.718	231.001		1000000232	110.05	13.202	-1087.09		1000000118	58.3386	164.009	-572.207		1000000003	94.4047	58.9564	-276.05
1000000639	161.351	165.1	223.654		1000000232	110.435	14.1379	-1088.23		1000000118	58.2458	163.622	-571.765		1000000003	90.8995	60.0004	-274.326
1000000639	160.891	166.849	221.825		1000000232	109.469	14.5306	-1088.82		1000000118	58.2836	163.921	-571.196		1000000003	91.3208	60.3954	-275.249
1000000639	162.227	165.285	225.791		1000000232	109.181	12.8197	-1083.39		1000000118	58.6165	164.681	-570.96		1000000003	91.4379	60.8661	-273.508
1000000639	161.73	166.107	224.758		1000000232	109.665	13.4433	-1088.59		1000000118	58.7101	165.005	-570.491		1000000003	90.1294	60.7506	-273.933
1000000639	160.849	166.209	222.44		1000000232	107.858	13.2682	-1083.9		1000000118	58.9389	164.75	-571.673		1000000003	89.4681	60.9347	-273.274
1000000639	162.571	167.312	226.248		1000000232	106.623	13.2314	-1086.47		1000000118	59.1871	164.434	-571.695		1000000003	89.0066	61.1232	-273.101
1000000639	163.298	166.098	227.127		1000000232	106.1	12.5232	-1086.6		1000000118	58.7048	164.904	-569.172		1000000003	90.4639	60.89	-273.887
1000000639	162.819	165.768	225.764		1000000232	107.315	13.1768	-1084.29		1000000118	59.0513	164.864	-568.046		1000000003	90.3226	61.6846	-275.807
1000000639	161.235	166.618	226.631		1000000232	107.789	13.0245	-1084.41		1000000118	59.6383	164.919	-570.635		1000000003	89.3607	60.3178	-273.399
1000000639	162.567	166.528	227.281		1000000232	106.769	12.4883	-1085.35		1000000118	59.1067	165.544	-567.994		1000000003	88.837	60.5184	-272.765
1000000639	162.703	166.53	225.299		1000000232	106.944	12.6037	-1083.31		1000000118	59.6636	166.343	-567.72		1000000003	89.0912	60.3322	-272.929
1000000639	161.524	166.424	225.881		1000000232	106.23	12.6137	-1084.04		1000000118	59.6049	166.227	-567.393		1000000003	89.7782	60.0857	-273.038
1000000639	162.627	165.821	227.251		1000000232	105.261	12.9833	-1082.3		1000000118	60.2592	166.359	-568.684		1000000003	89.1675	61.5152	-273.441
1000000639	163.204	166.254	226.778		1000000232	105.142	14.0865	-1083.71		1000000118	60.2728	166.635	-568.323		1000000003	88.5577	61.0709	-272.896
1000000639	162.196	166.94	225.97		1000000232	105.076	13.3276	-1084.34		1000000118	60.141	166.528	-568.08		1000000003	88.2599	60.563	-272.022
1000000639	162.664	165.856	226.699		1000000232	106.022	14.5385	-1085.57		1000000118	59.6661	165.897	-568.855		1000000003	88.1179	60.8974	-272.517
1000000639	162.455	165.946	226.324		1000000240	164.999	61.8842	-1080.94		1000000118	58.9472	165.815	-570.818		1000000003	88.22	61.3935	-272.384
1000000639	162.676	165.832	227.832		1000000240	166.059	62.2654	-1081.03		1000000118	59.0471	165.529	-567.752		1000000003	88.3569	60.8353	-271.103
1000000639	163.238	166.269	223.878		1000000240	164.578	61.7663	-1081.07		1000000118	59.1827	165.803	-567.282		1000000003	88.6003	60.1891	-271.434
1000000639	163.121	165.805	226.935		1000000240	166.429	60.6423	-1081.99		1000000118	58.8207	165.868	-567.02		1000000003	87.5815	60.5955	-270.403
1000000639	163.984	165.782	227.62		1000000240	166.017	60.5984	-1081.35		1000000118	57.6639	165.631	-566.729		1000000003	86.8938	59.0266	-267.628
1000000639	164.189	165.243	227.762		1000000240	166.962	60.1728	-1081.62		1000000118	57.3871	165.623	-567.108		1000000003	86.65	59.7681	-268.437
1000000639	164.87	166.353	228.059		1000000240	166.038	61.7583	-1081.42		1000000118	57.0622	165.7	-567.987		1000000003	86.3325	59.9237	-268.084
1000000639	163.261	165.296	227.012		1000000240	164.896	61.8539	-1081.86		1000000118	57.1617	165.314	-568.344		1000000003	86.6579	61.2655	-268.442
1000000639	163.055	164.281	227.978		1000000240	165.617	61.3426	-1081.85		1000000118	56.4032	165.458	-568.507		1000000003	86.399	60.048	-268.128
1000000639	163.605	165.051	228.462		1000000240	164.568	61.9961	-1081.65		1000000118	56.2254	165.618	-567.047		1000000003	85.2132	60.374	-267.309
1000000639	164.302	165.211	228.767		1000000240	165.269	61.1337	-1083.84		1000000118	56.1726	165.39	-566.496		1000000003	85.16	60.3702	-267.061
1000000639	163.658	165.17	226.578		1000000240	163.646	60.7752	-1081.85		1000000118	56.3274	165.2	-565.969		1000000003	85.6099	61.0171	-268.307
1000000639	163.955	166.201	228.344		1000000240	166.511	60.6469	-1081.69		1000000118	55.8334	164.971	-566.166		1000000003	84.8684	60.8031	-262.88
1000000639	164.417	164.871	227.63		1000000240	166.222	61.6574	-1082.2		1000000118	57.0112	165.112	-565.811		1000000003	85.4731	61.6899	-265.97
1000000639	164.632	166.21	227.841		1000000240	165.483	61.4831	-1082.03		1000000118	56.7554	165.155	-564.358		1000000003	84.8418	62.1983	-265.194
1000000639	163.841	165.303	226.872		1000000240	165.838	61.0995	-1081.29		1000000118	56.7166	164.744	-564.168		1000000027	163.779	83.4963	-281.667
1000000639	163.695	165.03	228.219		1000000240	164.468	61.4017	-1082.43		1000000118	57.8098	164.414	-565.668		1000000027	164.082	82.6935	-281.618
1000000639	162.975	165.591	228.655		1000000240	166.674	61.2299	-1083.69		1000000118	57.6038	164.792	-563.483		1000000027	165.855	82.5282	-281.772
1000000639	165.175	165.081	223.598		1000000240	165.753	60.7418	-1082.5		1000000118	56.2289	164.736	-563.425		1000000027	165.231	82.0225	-281.667
1000000639	163.338	164.882	226.598		1000000240	167.322	59.6535	-1082.42		1000000118	56.3541	164.754	-563.236		1000000027	166.101	81.8902	-281.244
1000000639	163.179	164.644	227.248		1000000240	167.603	59.8057	-1084.11		1000000118	56.4207	164.779	-563.863		1000000027	165.945	81.1658	-281.609
1000000639	162.585	165.051	226.463		1000000240	164.98	61.1092	-1082.01		1000000118	56.7323	164.627	-563.614		1000000027	166.301	81.9073	-281.11
1000000639	164.057	165.606	226.754		1000000240	166.964	60.5651	-1083.7		1000000118	56.9982	164.645	-563.728		1000000027	165.998	81.9607	-281.809
1000000639	163.882	164.169	223.883		1000000240	167.072	60.266	-1081.83		1000000118	57.3582	164.316	-565.584		1000000027	165.985	82.3528	-281.849
1000000639	163.634	165.812	227.119		1000000240	166.515	60.5141	-1083.52		1000000118	57.5715	164.97	-563.418		1000000027	166.013	81.9203	-282.811
1000000639	162.519	164.698	229.025		1000000240	164.544	61.7918	-1082.1		1000000118	57.5245	165.208	-564.164		1000000027	166.405	82.0168	-282.127
1000000639	163.528	164.819	227.547		1000000240	166.83	60.2383	-1083.9		1000000118	57.765	165.456	-564.506		1000000027	167.299	81.6708	-284.362
1000000639	162.31	165.923	229.212		1000000240	165.534	60.9827	-1081.87		1000000118	57.5708	165.366	-563.06		1000000027	167.284	82.5332	-284.89
1000000639	162.52	164.245	224.429		1000000240	166.717	61.1724	-1085.26		1000000118	57.3526	165.184	-562.694		1000000027	167.025	81.8844	-283.344
1000000639	162.283	164.959	227.791		1000000240	167.587	60.6267	-1081.94		1000000118	57.603	165.765	-562.022		1000000027	167.319	81.671	-283.054
1000000639	162.683	164.814	227.382		1000000240	164.479	61.865	-1081.87		1000000118	56.8838	165.584	-562.152		1000000027	167.799	81.3453	-282.717
1000000639	163.618	163.764	227.139		1000000240	165.638	61.0865	-1082.51		1000000118	56.9471	166.01	-563.076		1000000027	166.634	81.3832	-283.2
1000000639	162.434	164.048	227.847		1000000240	167.899	60.5777	-1084.76		1000000118	55.7199	165.631	-563.101		1000000027	168.076	81.926	-283.724
1000000639	163.377	164.016	226.829		1000000240	166.171	61.2471	-1083.2		1000000118	56.0713	165.277	-562.27		1000000027	169.218	82.269	-282.615
1000000639	162.224	163.435	227.067		1000000240	165.926	61.1176	-1082.51		1000000118	56.8105	165.72	-562.164		1000000027	168.154	82.3109	-284.969
1000000639	163.961	164.024	226.345		1000000240	167.838	60.3762	-1083.41		1000000118	57.3367	165.376	-561.86		1000000027	167.972	81.5613	-283.21
1000000639	162.818	163.928	228.113		1000000240	166.751	61.8102	-1081.3		1000000118	57.3187	165.294	-561.384		1000000027	167.792	82.6016	-283.135
1000000639	163.447	163.242	230.679		1000000309	179.274	4.49476	-1088.66		1000000118	57.5012	165.736	-560.877		1000000027	168.047	81.6493	-283.8
1000000639	162.668	163.28	226.762		1000000309	180.463	5.59286	-1088.13		1000000118	57.1132	165.255	-562.189		1000000027	166.093	82.356	-285.681
1000000639	163.305	163.158	223.88		1000000309	181.277	6.12476	-1088.14		1000000118	57.48	165.482	-562.911		1000000027	167.614	81.9099	-282.2
1000000639	162.588	163.484	226.998		1000000309	182.642	6.0126	-1089.39		1000000118	57.4752	165.254	-562.035		1000000027	168.091	81.9608	-283.472
1000000639	162.654	162.982	225.386		1000000309	183.615	5.767	-1089.18		1000000118	57.5528	165.102	-561.243		1000000027	167.987	81.697	-283.673
1000000639	162.45	164.199	227.737		1000000309	183.229	8.31921	-1089.09		1000000118	56.9351	164.868	-561.222		1000000027	167.396	81.5314	-284.328
1000000639	164.262	163.896	224.252		1000000309	181.969	9.0184	-1088.63		1000000118	57.7451	164.812	-561.29		1000000027	167.562	81.5032	-283.4
1000000639	162.729	163.581	227.482		1000000309	182.118	10.701	-1089.02		1000000118	57.7886	164.312	-561.682		1000000027	168.634	81.3047	-281.586
1000000639	163.244	162.889	223.892		1000000309	181.624	11.4418	-1089.17		1000000118	57.9923	164.753	-562.734		1000000027	167.231	81.8245	-282.684
1000000639	162.545	162.758	228.255		1000000309	182.675	13.1316	-1088.38		1000000118	58.0466	165.141	-562.101		1000000027	166.865	81.5442	-282.162
1000000639	163.793	162.249	228.577		1000000309	182.782	12.5734	-1088.32		1000000118	58.1526	165.277	-561.68		1000000027	166.889	81.3476	-281.448
1000000639	161.01	163.774	232.143		1000000309	183.513	13.5876	-1085.83		1000000118	58.5549	165.586	-560.727		1000000027	167.568	81.8958	-282.005
1000000639	161.49	163.71	227.231		1000000309	183.688	13.0216	-1088.58		1000000118	58.5413	166.5	-560.402		1000000027	167.079	81.44	-282.894
1000000639	163.678	162.495	227.913		1000000309	182.877	13.2467	-1084.41		1000000118	58.5928	165.721	-560.124		1000000027	167.738	81.1995	-285.634
1000000639	162.676	163.484	225.21		1000000309	181.372	12.1281	-1086.25		1000000118	58.3967	165.825	-561.308		1000000027	167.838	81.5761	-285.579
1000000639	163.269	162.9	228.287		1000000309	180.74	13.2484	-1086.87		1000000118	57.8491	165.799	-562.016		1000000027	167.067	80.4998	-282.767
1000000639	162.234	163.675	226.221		1000000309	177.954	11.3637	-1088.96		1000000118	58.1089	166.178	-562.269		1000000027	165.461	82.5627	-286.145
1000000639	163.465	163.332	228.7		1000000309	173.514	9.17535	-1089.98		1000000118	58.0096	165.652	-560.707		1000000027	165.59	82.0611	-284.522
1000000639	162.088	163.181	230.651		1000000309	171.298	6.08709	-1090.76		1000000118	57.816	166.271	-559.271		1000000027	165.792	82.3466	-286.113
1000000639	162.79	165.467	228.916		1000000309	174.051	0	-1090.58		1000000118	57.947	166.767	-558.453		1000000027	164.78	83.8244	-286.327
1000000639	162.516	162.916	228.257		1000000309	174.579	2.48738	-1094.59		1000000118	57.7894	165.927	-560.347		1000000027	165.349	82.8756	-286.677
1000000639	162.96	161.237	223.835		1000000309	174.958	2.37139	-1091.87		1000000118	57.9379	166.084	-560.95		1000000027	164.106	83.1	-286.364
1000000639	162.722	162.24	225.703		1000000309	177.385	0	-1089.98		1000000118	58.2171	166.398	-562.245		1000000027	164.505	82.2493	-284.377
1000000639	160.392	160.929	233.537		1000000309	178.294	0	-1090.82		1000000118	58.5955	166.217	-561.552		1000000027	164.378	82.4969	-285.801
1000000639	162.046	162.333	226.289		1000000309	177.851	0	-1091.48		1000000118	58.3102	165.717	-562.132		1000000027	166.145	80.822	-283.263
1000000639	163.223	162.226	227.564		1000000324	227.603	71.4049	-1083.83		1000000118	57.9081	166.204	-561.496		1000000027	165.244	80.725	-283.851
1000000639	160.192	162.773	231.269		1000000324	227.798	71.4475	-1084.88		1000000118	57.7867	166.684	-561.339		1000000027	165.367	80.849	-283.469
1000000639	163.36	162.237	227.373		1000000324	227.977	71.4478	-1085.19		1000000118	58.7805	166.69	-560.658		1000000027	165.047	81.9326	-286.099
1000000639	162.308	160.854	227.663		1000000324	227.467	70.8445	-1085.74		1000000118	58.0273	166.635	-561.074		1000000027	166.256	80.8029	-283.774
1000000639	162.098	160.696	227.756		1000000324	228.252	70.0036	-1084.75		1000000118	58.0901	166.382	-560.668		1000000027	166.62	80.9212	-285.083
1000000639	162.982	160.609	227.749		1000000324	228.648	69.9387	-1085.35		1000000118	58.3533	166.832	-559.2		1000000027	166.318	80.5158	-285.73
1000000639	162.545	160.935	227.465		1000000324	226.578	70.7598	-1084.84		1000000118	58.3023	166.044	-560.033		1000000027	165.81	80.3572	-285.813
1000000639	161.896	161.269	226.751		1000000324	227.133	71.1449	-1085.28		1000000118	58.4237	165.908	-561.332		1000000027	165.743	81.315	-285.48
1000000639	161.159	160.767	227.683		1000000324	227.071	70.2208	-1087.01		1000000118	59.2349	166.647	-559.969		1000000027	165.51	80.5106	-286.002
1000000639	163.2	161.134	228.087		1000000324	225.905	70.1152	-1085.55		1000000118	59.4537	167.572	-559.036		1000000027	165.526	80.9087	-285.844
1000000639	162.651	160.116	227.347		1000000324	226.794	69.1031	-1089.47		1000000118	60.1356	167.591	-558.99		1000000027	165.504	80.2382	-286.124
1000000639	160.633	161.376	230.331		1000000324	227.083	70.5356	-1085.52		1000000118	60.3597	167.913	-557.948		1000000027	166.336	80.9373	-286.828
1000000639	163.496	161.939	227.328		1000000324	226.34	69.3535	-1086.38		1000000118	60.4444	167.919	-562.438		1000000027	166.229	80.7579	-286.644
1000000639	163.582	161.973	227.478		1000000324	227.296	69.6607	-1086.62		1000000118	61.2098	168.229	-562.278		1000000027	165.763	80.3592	-285.639
1000000639	163.051	160.285	227.196		1000000324	226.726	70.3576	-1086.77		1000000118	61.082	168.557	-558.309		1000000027	166.255	79.879	-287.747
1000000639	162.082	160.271	225.84		1000000324	226.474	69.644	-1086.01		1000000118	61.5327	168.963	-562.307		1000000027	166.238	80.0903	-288.415
1000000639	161.823	160.939	228.228		1000000324	227.451	69.8273	-1088.71		1000000118	61.4417	169.322	-562.311		1000000027	164.387	79.7985	-292.21
1000000639	163.023	161.145	226.95		1000000324	227.182	70.4249	-1089.37		1000000118	61.2812	170.419	-561.047		1000000027	164.607	79.521	-292.21
1000000639	160.986	160.532	227.065		1000000324	226.332	69.3715	-1088.22		1000000118	61.8236	170.878	-561.661		1000000027	164.764	80.3249	-292.21
1000000639	161.406	160.954	227.469		1000000324	227.512	69.2756	-1088.56		1000000118	61.7398	170.413	-560.029		1000000027	165.745	80.1895	-292.21
1000000639	162.235	160.386	227.359		1000000324	227.401	69.7783	-1089.23		1000000118	62.6663	171.419	-559.899		1000000027	166.04	80.2753	-292.21
1000000639	161.892	160.725	226.752		1000000324	226.708	69.5385	-1089.84		1000000118	62.2407	171.695	-559.939		1000000027	165.06	79.6182	-292.21
1000000639	163.819	160.735	224.012		1000000324	227.507	69.7897	-1088.27		1000000118	62.2698	171.521	-558.223		1000000027	164.791	79.3388	-289.329
1000000639	161.111	161.055	226.252		1000000324	226.39	69.1264	-1089.4		1000000118	61.9685	171.634	-559.614		1000000027	166.234	78.7213	-286.753
1000000639	161.668	160.714	226.252		1000000324	227.683	69.4325	-1090.24		1000000118	62.2651	171.855	-559.412		1000000027	167.619	79.4619	-286.524
1000000639	163.503	160.103	223.618		1000000324	226.979	70.3142	-1090.17		1000000118	61.6827	171.059	-558.088		1000000027	167.323	79.3978	-286.332
1000000639	163.334	161.562	224.313		1000000324	227.529	69.0394	-1090.31		1000000118	61.8451	171.195	-557.44		1000000027	165.195	74.725	-281.971
1000000639	163.006	160.779	222.515		1000000324	225.835	69.4822	-1089.65		1000000118	61.3258	172.009	-556.994		1000000027	165.199	76.0521	-282.86
1000000639	162.518	160.684	228.385		1000000324	226.902	69.7845	-1090.85		1000000118	61.9376	172.025	-557.799		1000000027	164.121	75.2381	-282.957
1000000639	162.822	161.5	224.171		1000000324	226.468	69.7041	-1089.63		1000000118	61.3694	172.396	-557.913		1000000027	165.617	75.5908	-282.737
1000000639	163.148	160.883	227.344		1000000324	227.739	70.0016	-1089.12		1000000118	62.1418	172.81	-557.727		1000000027	165.55	74.8116	-282.859
1000000639	159.397	162.429	231.255		1000000324	227.913	70.1777	-1090.48		1000000118	61.5143	172.87	-557.375		1000000027	165.448	74.1864	-282.772
1000000639	161.065	160.341	228.41		1000000324	227.284	70.1139	-1090.48		1000000118	61.7043	173.214	-558.188		1000000027	163.797	73.3261	-281.045
1000000639	160.849	159.598	228.219		1000000324	227.434	70.4678	-1090.3		1000000118	61.678	173.32	-561.728		1000000027	163.831	73.4345	-281.282
1000000639	159.924	160.112	227.599		1000000324	227.371	69.7375	-1091.93		1000000118	62.1091	173.417	-560.697		1000000027	164.352	74.8262	-282.344
1000000639	160.864	160.454	226.857		1000000324	228.527	70.1901	-1090.14		1000000118	62.3555	174.029	-562.106		1000000027	164.915	75.4706	-282.938
1000000639	160.723	160.99	226.188		1000000324	228.876	70.2919	-1088.89		1000000118	62.3059	172.945	-561.962		1000000027	164.609	75.2659	-282.227
1000000639	160.334	160.24	227.355		1000000324	229.133	70.271	-1089.66		1000000118	61.7595	172.211	-561.33		1000000027	164.702	75.0182	-282.032
1000000639	160.509	160.935	226.573		1000000324	227.645	70.0566	-1089.49		1000000118	61.3496	171.502	-561.214		1000000027	163.581	75.1342	-281.94
1000000639	161.249	161.248	225.881		1000000324	228.105	70.1941	-1090.9		1000000118	61.5815	170.924	-559.421		1000000027	162.956	74.9747	-281.943
1000000639	162.05	161.388	224.426		1000000324	228.693	70.783	-1091.53		1000000118	61.1485	170.874	-558.832		1000000027	162.322	74.0866	-281.171
1000000639	159.837	161.147	230.906		1000000324	229.362	69.6097	-1093.02		1000000118	60.3114	171.723	-557.366		1000000027	162.383	73.8839	-276.793
1000000639	161.689	160.341	223.957		1000000324	228.632	69.5612	-1089.54		1000000118	60.7421	171.506	-556.849		1000000027	161.763	73.3083	-277.281
1000000639	160.339	160.444	226.613		1000000324	229.547	70.4282	-1094.08		1000000118	60.8401	171.93	-557.401		1000000027	161.114	73.6046	-276.959
1000000639	161.761	160.645	223.481		1000000324	230.153	70.5944	-1088.53		1000000118	61.3723	172.172	-557.634		1000000027	159.79	73.3179	-277.096
1000000639	161.295	159.657	228.28		1000000324	229.181	71.0876	-1091.02		1000000118	60.8049	172.011	-557.128		1000000027	160.958	72.9198	-277.226
1000000639	161.399	160.249	228.101		1000000324	229.118	71.22	-1091.91		1000000118	60.4871	171.815	-556.958		1000000027	161.95	73.4337	-277.71
1000000710	196.942	143.74	224.312		1000000324	229.487	71.9133	-1090.28		1000000118	61.3309	172.063	-557.546		1000000027	161.27	73.3433	-277.64
1000000710	197.987	144.094	222.822		1000000324	229.853	70.6533	-1089.93		1000000118	61.591	171.438	-556.615		1000000027	161.434	73.5305	-278.557
1000000710	196.79	143.912	226.349		1000000324	229.636	71.0855	-1090.88		1000000118	61.6443	171.275	-556.941		1000000027	162.291	72.8634	-279.168
1000000710	197.566	143.966	223.014		1000000324	230.294	70.3291	-1094.49		1000000118	61.7644	171.281	-557.176		1000000027	161.88	73.8448	-278.141
1000000710	197.954	144.228	223.082		1000000324	230.046	70.7856	-1090.93		1000000118	61.9412	171.355	-557.534		1000000027	162.284	73.9037	-279.178
1000000710	196.181	143.568	226.05		1000000324	230.047	70.6106	-1089.18		1000000118	61.8698	171.398	-556.889		1000000027	162.216	73.7074	-278.254
1000000710	196.968	144.137	222.606		1000000324	229.017	70.7186	-1090.37		1000000118	61.5494	171.172	-557.088		1000000027	161.474	72.74	-278.365
1000000710	196.913	144.087	223.245		1000000324	229.055	70.0352	-1089.69		1000000118	61.6838	171.174	-557.445		1000000027	162.09	73.5602	-278.475
1000000710	197.171	144.152	224.213		1000000324	228.533	70.0905	-1090.15		1000000118	61.8232	170.911	-557.711		1000000027	164.094	74.1221	-280.752
1000000710	196.709	143.628	222.406		1000000324	228.967	71.6924	-1089.95		1000000118	62.2784	170.926	-557.277		1000000027	161.023	72.9687	-277.964
1000000710	196.562	143.754	222.687		1000000324	229.146	71.1001	-1090.18		1000000118	61.9518	171.018	-558.351		1000000027	161.104	73.0855	-278.065
1000000710	197.368	143.831	223.396		1000000324	229.247	70.6381	-1088.53		1000000118	61.9088	170.552	-558.019		1000000027	162.226	72.8876	-277.561
1000000710	196.588	143.708	219.943		1000000324	229.047	70.6431	-1088.25		1000000118	61.867	171.066	-558.243		1000000027	160.896	72.0034	-277.16
1000000710	196.271	142.803	222.776		1000000324	228.676	71.0504	-1086.77		1000000118	62.1485	170.325	-560.061		1000000027	160.757	72.5824	-277.125
1000000710	195.652	142.37	222.338		1000000324	229.419	70.5131	-1089.06		1000000118	62.3983	170.272	-558.613		1000000027	159.692	71.7124	-276.964
1000000710	196.555	143.18	222.55		1000000324	228.364	71.2206	-1086.9		1000000118	62.2073	170.123	-559.933		1000000027	159.448	70.6296	-276.361
1000000710	197.249	144.041	222.737		1000000324	229.299	70.0129	-1091.08		1000000118	61.6944	171.209	-561.017		1000000027	160.937	71.8239	-277.16
1000000710	195.655	143.588	222.747		1000000324	230.186	70.9541	-1091.27		1000000118	61.0634	170.897	-558.636		1000000027	161.909	72.2275	-277.599
1000000710	196.916	143.586	222.634		1000000324	228.829	70.4226	-1091.95		1000000118	61.307	170.769	-558.129		1000000027	163.132	74.5938	-281.242
1000000710	196.519	143.811	223.052		1000000324	230.558	71.0032	-1090.38		1000000118	61.8802	170.185	-558.581		1000000027	163.136	74.2852	-281.831
1000000710	196.641	143.611	222.875		1000000324	232.667	70.1665	-1095.08		1000000118	61.8073	170.869	-558.272		1000000027	163.07	74.2016	-281.398
1000000710	196.105	143.24	221.995		1000000324	229.656	70.4375	-1090.41		1000000118	62.055	170.815	-558.552		1000000031	50.8919	143.367	-283.325
1000000710	195.876	143.478	220.582		1000000324	231.253	70.8084	-1091.14		1000000118	61.2469	170.835	-559.588		1000000031	50.8429	143.486	-283.645
1000000710	196.266	143.49	222.619		1000000324	231.498	70.406	-1094.41		1000000118	60.9237	171.442	-556.482		1000000031	51.2667	142.602	-285.207
1000000710	196.031	143.653	222.694		1000000324	230.77	70.0452	-1094.04		1000000118	60.7139	171.457	-559.309		1000000031	52.0661	141.152	-283.876
1000000710	196.16	143.743	223.025		1000000324	231.043	70.321	-1089.21		1000000118	60.3755	170.893	-560.218		1000000031	52.0397	140.879	-284.128
1000000710	196.469	143.34	222.622		1000000324	230.965	70.5098	-1088.86		1000000118	60.9605	171.305	-558.433		1000000031	51.2445	142.449	-285.579
1000000710	196.219	142.878	222.847		1000000324	230.277	71.1884	-1093.89		1000000118	60.8338	170.844	-557.937		1000000031	51.1536	142.981	-286.848
1000000710	197.028	143.522	222.649		1000000324	231.28	71.1051	-1093.95		1000000118	60.7056	171.157	-558.669		1000000031	50.9553	143.019	-286.872
1000000710	195.521	142.192	222.504		1000000324	231.16	71.0065	-1093.56		1000000118	60.7225	170.783	-558.582		1000000031	50.8194	144.524	-287.801
1000000710	197.166	143.725	223.153		1000000324	231.29	70.6647	-1093.84		1000000118	60.2661	171.146	-559.224		1000000031	50.6332	144.658	-287.514
1000000710	196.407	143.482	222.915		1000000324	231.177	70.3398	-1090.47		1000000118	60.4613	170.931	-559.018		1000000031	50.7977	144.334	-287.536
1000000710	196.845	143.467	223.745		1000000324	230.447	70.4634	-1090.37		1000000118	61.2035	171.272	-559.735		1000000031	51.192	143.65	-287.842
1000000710	196.136	143.216	222.781		1000000324	231.921	71.8845	-1093.19		1000000176	242.642	66.1152	-570.976		1000000031	51.5623	143.141	-287.663
1000000710	197.05	143.153	222.612		1000000324	230.938	71.3595	-1090.82		1000000176	242.41	66.0911	-571.398		1000000031	51.4002	143.022	-288.122
1000000710	197.133	143.143	222.768		1000000324	230.07	71.5938	-1090.72		1000000176	242.374	65.7535	-571.694		1000000031	51.6933	141.715	-288.497
1000000710	196.764	142.935	222.397		1000000324	229.523	70.1751	-1089.45		1000000176	242.82	65.9808	-572.381		1000000031	51.6111	141.788	-288.059
1000000710	196.427	142.92	222.275		1000000324	230.253	71.0302	-1090.56		1000000176	243.402	66.5243	-571.801		1000000031	51.9091	141.96	-288.43
1000000710	195.705	142.429	222.333		1000000324	227.806	69.6491	-1090.26		1000000176	242.818	65.8067	-573.8		1000000031	52.1067	142.606	-287.626
1000000710	196.649	143.119	222.491		1000000324	228.272	69.1546	-1092.33		1000000176	243.415	66.0521	-573.27		1000000031	52.5466	142.139	-287.502
1000000710	196.995	142.993	222.733		1000000324	228.285	68.8983	-1094.31		1000000176	243.823	65.4044	-574.089		1000000031	53.1922	142.326	-292.21
1000000710	196.993	142.987	222.821		1000000324	229.005	69.1312	-1094.97		1000000176	243.808	65.6365	-573.296		1000000031	53.0949	143.224	-292.21
1000000710	196.958	143.435	222.513		1000000324	228.07	68.4575	-1091.74		1000000176	243.452	65.6966	-575.912		1000000031	52.3545	142.697	-288.958
1000000710	196.487	143.511	221.301		1000000324	229.34	69.5155	-1089.85		1000000176	244.242	65.5908	-573.918		1000000031	51.68	142.555	-288.333
1000000710	195.501	141.535	222.465		1000000324	228.046	69.0296	-1091.83		1000000176	243.159	66.2402	-575.581		1000000031	51.1967	143.152	-287.599
1000000710	196.655	144.037	222.003		1000000324	228.719	69.2018	-1089.63		1000000176	243.067	65.6824	-575.009		1000000031	51.6365	142.558	-287.114
1000000710	196.475	143.277	222.166		1000000324	228.207	69.2505	-1091.1		1000000176	243.646	67.0288	-576.205		1000000031	51.1721	142.146	-287.08
1000000710	196.912	142.952	222.427		1000000324	228.484	69.8236	-1091.97		1000000176	244.508	66.8676	-574.193		1000000031	51.4349	141.406	-286.853
1000000710	200.307	145.788	218.061		1000000324	227.52	68.541	-1091.28		1000000176	244.223	67.5129	-576.415		1000000031	50.847	140.006	-283.965
1000000710	200.882	145.455	217.788		1000000324	228.41	68.5197	-1093.38		1000000176	244.157	67.5903	-575.766		1000000031	50.6987	139.294	-282.942
1000000710	201.587	147.244	217.842		1000000324	230.031	68.9147	-1095.09		1000000176	244.166	66.9838	-573.063		1000000031	51.4737	139.089	-283.403
1000000710	201.223	146.698	217.852		1000000324	228.808	68.0919	-1094.59		1000000176	244.388	67.8342	-573.871		1000000031	51.7452	138.426	-282.906
1000000710	201.579	145.755	217.473		1000000324	228.619	68.0871	-1094.27		1000000176	243.779	67.8349	-575.326		1000000031	51.2697	138.784	-283.702
1000000710	201.841	146.507	217.446		1000000324	227.868	67.9863	-1095.18		1000000176	244.584	67.0361	-573.053		1000000031	51.6638	138.287	-283.123
1000000710	201.743	145.835	217.576		1000000324	227.746	68.334	-1094.8		1000000176	245.323	68.0052	-574.155		1000000031	51.9036	138.814	-283.447
1000000710	201.966	145.939	217.586		1000000324	227.113	68.2461	-1095.86		1000000176	244.49	68.0405	-575.6		1000000031	51.677	138.513	-284.21
1000000710	202.116	146.488	217.699		1000000324	227.082	67.669	-1095.95		1000000176	244.669	68.2037	-576.525		1000000031	52.4523	137.875	-285.957
1000000710	202.266	146.034	217.481		1000000324	225.342	67.3394	-1095.73		1000000176	244.175	68.8514	-575.616		1000000031	49.9432	131.984	-285.658
1000000710	202.006	146.733	217.84		1000000324	225.761	67.9811	-1095.43		1000000176	244.55	68.2339	-573.32		1000000031	49.6399	131.434	-285.989
1000000710	202.001	145.826	217.648		1000000324	226.292	68.0434	-1095.01		1000000176	244.115	68.2466	-572.957		1000000031	49.1435	131.483	-285.803
1000000710	202.373	145.893	217.552		1000000324	226.973	68.3527	-1095.3		1000000176	244.107	68.1074	-576.408		1000000031	49.2007	131.312	-285.477
1000000710	202.414	146.839	211.179		1000000324	228.221	69.2096	-1095.28		1000000176	244.663	68.2927	-575.367		1000000031	49.1138	131.405	-285.824
1000000710	203.336	146.301	213.14		1000000324	227.777	68.7621	-1097.92		1000000176	244.42	68.4589	-574.004		1000000031	49.1986	131.74	-286.218
1000000710	202.582	146.593	217.15		1000000324	227.071	68.6552	-1091.52		1000000176	244.339	68.5191	-577.123		1000000031	49.3852	131.802	-286.564
1000000710	202.48	146.596	217.106		1000000324	227.057	68.5088	-1093.83		1000000176	243.697	69.3292	-576.182		1000000031	49.2713	131.838	-286.323
1000000710	202.723	147.542	215.835		1000000324	228.17	68.2207	-1094.09		1000000176	244.134	69.5623	-575.368		1000000031	49.127	131.717	-286.172
1000000710	202.779	146.608	217.029		1000000324	228.925	68.8667	-1099.96		1000000176	244.767	68.9668	-572.597		1000000031	49.5764	131.231	-286.349
1000000710	202.804	146.874	216.438		1000000324	228.2	69.3119	-1096.81		1000000176	243.711	69.3754	-576.12		1000000031	49.2389	131.716	-286.291
1000000710	202.467	146.457	216.969		1000000324	228.569	68.5201	-1099.19		1000000176	243.901	68.2726	-576.338		1000000031	48.3206	131.814	-286.35
1000000710	202.839	147.069	217.648		1000000355	281.698	57.587	-1119.37		1000000176	244.224	68.7087	-572.806		1000000031	48.2466	131.457	-286.529
1000000710	203.119	147.507	212.62		1000000355	281.934	58.0436	-1119.64		1000000176	243.378	70.0509	-574.139		1000000031	48.6391	131.531	-286.475
1000000710	203.282	147.489	214.73		1000000355	281.045	57.7804	-1119.85		1000000176	244.608	68.6417	-572.957		1000000031	48.6568	131.848	-286.61
1000000710	202.452	146.297	216.396		1000000355	282.049	57.0631	-1120.92		1000000176	244.065	69.2478	-574.454		1000000031	48.8561	131.897	-286.882
1000000710	202.549	147.109	213.977		1000000355	281.957	55.9939	-1120.5		1000000176	243.453	69.1111	-573.977		1000000031	49.0051	131.402	-286.823
1000000710	202.604	147.548	213.819		1000000355	282.236	55.793	-1119.53		1000000176	242.953	69.9623	-571.896		1000000031	48.8238	131.386	-286.956
1000000710	202.058	146.805	216.263		1000000355	282.239	55.9717	-1119.35		1000000176	243.624	70.7079	-573.855		1000000031	48.8769	131.683	-286.438
1000000710	201.755	146.313	216.096		1000000355	281.187	55.7598	-1120.47		1000000176	243.944	69.339	-575.673		1000000031	48.9381	131.712	-286.443
1000000710	201.55	145.734	216.914		1000000355	281.06	55.3171	-1120.23		1000000176	244.284	69.2781	-573.094		1000000031	48.8511	132.07	-285.666
1000000710	202.183	147.248	212.698		1000000355	280.976	55.7028	-1120.21		1000000176	243.316	70.0544	-572.741		1000000031	49.6604	132.425	-284.244
1000000710	202.031	147.043	213.056		1000000355	281.106	56.5252	-1121.83		1000000176	245.545	70.4693	-572.3		1000000031	49.2343	132.543	-285.764
1000000710	202.117	146.756	215.969		1000000355	281.733	56.2563	-1125.22		1000000176	244.935	70.833	-572.901		1000000031	50.2521	135.328	-283.586
1000000710	203.049	146.495	216.95		1000000355	281.493	56.0059	-1120.53		1000000176	244.838	71.0781	-571.613		1000000031	51.2223	138.094	-283.954
1000000710	203.071	146.855	212.625		1000000355	281.56	54.9869	-1120.32		1000000176	243.621	71.2626	-571.383		1000000031	50.9609	139.064	-284.002
1000000710	202.929	147.349	212.939		1000000355	281.484	55.3535	-1120.23		1000000176	244.726	71.7471	-572.941		1000000031	51.0206	138.799	-284.326
1000000710	203.591	148.067	213.697		1000000355	281.119	56.4326	-1120.49		1000000176	245.012	72.7688	-572.168		1000000031	49.9399	138.687	-282.291
1000000710	204.673	148.028	216.191		1000000355	280.599	57.0938	-1120.85		1000000176	245.617	73.1081	-572.073		1000000031	50.0528	138.998	-283.423
1000000710	204.088	147.566	214.335		1000000355	281.851	57.122	-1125.22		1000000176	246.096	75.0579	-571.523		1000000031	50.4822	139.655	-284.223
1000000710	204.382	147.486	214.284		1000000355	281.557	56.4084	-1125.22		1000000176	245.427	74.221	-571.794		1000000031	50.9585	139.559	-284.322
1000000710	203.192	146.992	213.706		1000000355	281.255	56.9222	-1125.22		1000000176	246.777	76.508	-568.805		1000000031	50.8187	138.938	-283.814
1000000710	203.12	147.166	215.91		1000000355	281.883	56.7688	-1125.22		1000000176	246.615	76.1298	-571.531		1000000031	50.5896	138.733	-283.819
1000000710	202.518	146.869	213.375		1000000355	280.672	55.7958	-1125.22		1000000176	246.452	76.3617	-571.44		1000000031	50.0993	139.143	-282.898
1000000710	202.108	146.537	213.591		1000000355	281.508	55.0164	-1125.22		1000000176	245.558	75.743	-570.828		1000000031	49.6062	139.201	-282.801
1000000710	201.626	146.453	214.044		1000000355	280.977	55.6899	-1125.22		1000000176	245.659	75.829	-571.076		1000000031	49.3655	139.175	-282.825
1000000710	202.482	146.441	212.865		1000000355	279.341	56.8703	-1125.22		1000000176	245.613	76.4485	-570.614		1000000031	49.4839	139.772	-283.25
1000000710	202.415	146.547	212.707		1000000355	279.859	56.3103	-1125.22		1000000176	246.248	75.4385	-571.416		1000000031	49.4566	139.847	-283.725
1000000710	203.162	146.698	213.039		1000000355	281.277	57.5314	-1125.22		1000000176	245.84	77.2823	-567.47		1000000031	49.1469	139.243	-283.522
1000000710	202.877	147.34	212.731		1000000355	279.738	56.7953	-1125.22		1000000176	244.927	79.2917	-568.567		1000000031	49.0614	139.317	-284.015
1000000710	203.41	147.742	214.099		1000000355	280.953	55.7433	-1125.22		1000000176	245.454	77.7056	-570.875		1000000031	49.6888	139.266	-285.061
1000000710	204.102	148.051	212.827		1000000355	281.144	56.2504	-1125.22		1000000176	244.912	78.5377	-567.409		1000000031	49.4789	139.591	-282.901
1000000710	203.868	148.736	213.458		1000000355	283.208	56.7878	-1125.22		1000000176	244.026	79.3986	-566.612		1000000031	49.4554	139.667	-282.33
1000000710	203.623	148.689	215.451		1000000355	282.007	55.2937	-1125.22		1000000176	244.863	77.5923	-570.143		1000000031	48.8595	138.897	-281.837
1000000938	140.86	201.459	192.4		1000000355	282.077	55.9061	-1125.22		1000000176	244.37	78.6288	-569.411		1000000031	49.224	138.335	-282.153
1000000938	141.57	201.6	192.4		1000000355	280.465	55.8604	-1125.22		1000000176	245.14	80.2646	-567.129		1000000031	49.0982	139.034	-282.691
1000000938	141.964	201.127	192.4		1000000355	280.963	55.1571	-1125.22		1000000176	244.859	79.1428	-566.699		1000000031	49.8401	139.055	-283.155
1000000938	141.97	201.519	192.4		1000000355	282.189	55.8698	-1125.22		1000000176	245.132	79.328	-567.601		1000000031	49.6988	139.794	-283.384
1000000938	142.463	200.021	192.4		1000000355	283.59	55.9635	-1125.22		1000000176	245.367	79.9885	-566.857		1000000031	49.8567	139.223	-283.644
1000000938	142.403	198.952	197.18		1000000355	282.851	55.55	-1125.22		1000000176	245.722	79.8119	-567.872		1000000031	49.8585	139.899	-283.541
1000000938	142.362	199.653	196.55		1000000355	282.833	56.0493	-1125.22		1000000176	245.779	80.097	-567.834		1000000031	50.0403	140.252	-284.053
1000000938	141.132	201.846	192.4		1000000355	279.645	55.6647	-1125.22		1000000176	246.345	78.6967	-566.349		1000000031	49.3504	140.411	-285.089
1000000938	142.122	201.034	192.4		1000000355	276.853	57.2099	-1125.22		1000000176	245.327	79.5771	-566.641		1000000031	49.8214	140.228	-281.178
1000000938	142.63	199.342	196.005		1000000355	279.203	56.149	-1125.22		1000000176	246.446	79.683	-566.472		1000000031	49.8883	140.39	-280.951
1000000938	141.636	201.327	192.4		1000000355	278.699	57.0405	-1118.97		1000000176	244.374	79.6044	-566.298		1000000031	49.9698	139.908	-281.149
1000000938	141.542	201.137	192.4		1000000355	281.182	56.4863	-1125.22		1000000176	245.33	79.8606	-566.775		1000000031	50.5441	139.566	-281.373
1000000938	141.026	201.966	195.299		1000000355	282.594	56.0401	-1119.19		1000000176	244.401	79.9443	-566.723		1000000031	50.6114	139.013	-281.993
1000000938	140.896	201.587	192.4		1000000355	283.314	57.2138	-1125.22		1000000176	245.649	80.4616	-568.327		1000000031	50.6857	138.598	-281.578
1000000938	142.023	201.314	195.072		1000000355	283.134	57.1948	-1125.22		1000000176	246.314	80.4935	-568.884		1000000031	50.6804	139.641	-281.253
1000000938	142.329	200.79	192.4		1000000355	282.742	58.693	-1118.9		1000000176	245.477	79.5978	-566.979		1000000031	51.0467	139.024	-282.467
1000000938	141.757	201.42	192.4		1000000355	281.54	56.6635	-1118.71		1000000176	244.404	79.9056	-566.393		1000000031	50.8004	138.38	-281.125
1000000938	141.955	201.453	192.4		1000000368	263.248	39.8107	-1111.96		1000000176	245.414	80.5975	-566.562		1000000031	50.6173	138.225	-281.804
1000000938	141.519	201.597	192.4		1000000368	263.127	39.4911	-1111.58		1000000176	245.554	80.5446	-567.024		1000000031	50.4866	138.65	-282.215
1000000938	141.3	201.903	192.4		1000000368	263.641	39.0564	-1113.4		1000000176	245.642	80.2987	-566.655		1000000031	50.6229	138.396	-281.551
1000000938	140.813	201.676	192.4		1000000368	263.311	38.5443	-1111.19		1000000176	246.355	79.5787	-565.983		1000000031	50.7139	138.261	-282.079
1000000938	141.901	201.066	192.4		1000000368	262.57	38.4519	-1110.82		1000000176	244.325	78.8111	-566.415		1000000031	50.9052	139.099	-282.603
1000000938	140.694	202.098	192.4		1000000368	264.043	38.3035	-1110.11		1000000176	244.943	78.6272	-566.132		1000000031	50.6497	139.149	-282.32
1000000938	141.425	201.404	192.4		1000000368	264.17	38.9667	-1110.45		1000000176	246.424	78.8133	-566.069		1000000031	50.7108	138.525	-282.311
1000000938	141.1	201.524	192.4		1000000368	263.792	38.6481	-1110.68		1000000176	245.731	80.1514	-565.689		1000000031	50.5974	138.482	-282.441
1000000938	140.519	202.405	192.4		1000000368	264.161	38.3624	-1110.87		1000000176	246.057	80.632	-565.907		1000000031	50.877	138.47	-282.467
1000000938	140.1	202.059	195.242		1000000368	264.843	38.8646	-1111.12		1000000176	245.121	79.1671	-563.621		1000000031	50.6371	138.612	-282.318
1000000938	140.837	202.055	195.847		1000000368	263.986	38.8508	-1113.54		1000000176	247.057	79.1352	-565.555		1000000031	50.5641	138.641	-283.333
1000000943	161.13	251.483	192.4		1000000368	263.86	38.7319	-1113.83		1000000176	246.399	79.4631	-563.788		1000000031	50.7628	139.032	-283.24
1000000943	160.683	251.655	192.4		1000000368	263.713	37.918	-1112.56		1000000176	247.159	79.4212	-565.692		1000000031	51.1043	138.9	-283.729
1000000943	160.537	251.544	192.4		1000000368	264.623	38.5194	-1114.73		1000000176	246.322	79.3617	-566.014		1000000031	52.0834	139.217	-285.275
1000000943	162.046	251.671	192.4		1000000368	263.741	39.362	-1112.82		1000000176	246.251	80.0315	-566.423		1000000031	51.7594	139.304	-285.013
1000000943	161.05	251.368	192.4		1000000368	264.117	39.6809	-1113.32		1000000176	245.956	80.1995	-566.255		1000000031	51.5847	139.814	-285.631
1000000943	160.824	252.152	195.114		1000000368	263.52	39.6048	-1114.1		1000000176	247.267	80.9661	-565.828		1000000031	51.7523	139.167	-286.308
1000000943	160.417	252.703	197.503		1000000368	262.846	39.3952	-1112.21		1000000176	246.583	80.0131	-565.478		1000000031	51.2334	139	-285.539
1000000943	161.616	251.419	192.4		1000000368	263.618	39.0571	-1113.08		1000000176	245.781	79.525	-563.442		1000000031	50.3921	139.032	-284.516
1000000943	164.648	253.453	197.07		1000000368	263.838	37.8412	-1111.04		1000000176	246.47	79.6849	-562.824		1000000031	51.3514	138.774	-285.087
1000000943	161.542	252.368	195.872		1000000368	263.659	38.2424	-1115.39		1000000176	246.913	78.5808	-563.532		1000000031	50.6385	138.487	-283.431
1000000943	160.151	251.139	192.4		1000000368	263.357	38.5379	-1111.7		1000000176	244.974	79.0403	-563.975		1000000031	50.8888	139.143	-283.658
1000000943	160.191	252.272	196.94		1000000368	263.814	38.1442	-1115.52		1000000176	245.688	79.5657	-564.086		1000000031	50.5911	138.765	-283.754
1000000943	160.298	250.72	192.4		1000000368	264.229	38.5282	-1115.77		1000000176	245.676	79.8139	-561.657		1000000031	50.532	138.64	-283.533
1000000943	160.963	252.172	195.811		1000000368	265.084	38.5488	-1114.97		1000000176	245.817	79.0395	-561.538		1000000031	50.8125	138.883	-285.098
1000000943	159.091	252.172	195.697		1000000368	264.554	38.6947	-1114.59		1000000176	246.295	80.1185	-561.678		1000000031	51.285	138.13	-285.206
1000000943	160.142	252.285	197.079		1000000368	268.695	38.2981	-1116.08		1000000176	246.016	79.4042	-562.036		1000000031	50.5409	137.92	-284.075
1000000943	160.414	251.569	192.4		1000000368	264.769	39.0983	-1115.59		1000000176	245.799	78.7433	-561.917		1000000031	50.2719	137.937	-283.735
1000000943	159.982	252.938	196.92		1000000368	266.085	38.3866	-1114.45		1000000176	246.324	80.587	-563.701		1000000031	50.2241	138.536	-284.104
1000000943	160.181	251.864	192.4		1000000368	264.427	38.1461	-1115.15		1000000176	246.295	80.688	-561.976		1000000031	49.7705	138.399	-283.443
1000000943	160.651	253.416	197.321		1000000368	272.073	38.2516	-1114.78		1000000176	247.025	79.7175	-561.478		1000000031	49.6767	138.334	-283.442
1000000943	160.948	251.793	192.4		1000000368	264.376	38.0811	-1115.34		1000000176	245.822	79.8264	-562.095		1000000031	49.8053	138.279	-283.273
1000000943	159.886	253.016	196.655		1000000368	264.432	39.0707	-1117.62		1000000176	246.009	79.262	-561.776		1000000031	49.1367	138.186	-282.778
1000000964	148.876	174.54	212.373		1000000368	263.03	38.6036	-1115.37		1000000176	245.583	79.049	-561.865		1000000031	49.3819	137.59	-282.958
1000000964	146.772	173.535	212.704		1000000368	263.757	38.6949	-1116.64		1000000176	246.299	79.4486	-562.152		1000000031	49.4186	138.004	-282.423
1000000964	146.763	174.121	213.048		1000000368	264.598	38.7931	-1116.74		1000000176	246.322	80.1057	-562.318		1000000031	49.6234	137.546	-282.23
1000000964	144.337	174.12	212.123		1000000368	264.29	38.9314	-1114.41		1000000176	245.509	79.6757	-561.499		1000000031	48.8725	137.366	-282.168
1000000964	143.221	173.524	212.722		1000000368	264.762	38.5745	-1115.04		1000000176	246.111	79.0765	-558.296		1000000031	49.0858	138.115	-282.255
1000000964	142.919	173.368	213.972		1000000368	265.652	38.2782	-1115.83		1000000176	246.683	80.8431	-560.47		1000000031	49.4957	137.749	-282.694
1000000964	142.214	173.067	213.145		1000000368	263.697	38.9769	-1115.34		1000000176	247.385	81.0939	-559.839		1000000031	49.7944	137.425	-282.424
1000000964	142.475	173.531	213.083		1000000368	264.458	39.0777	-1116.29		1000000176	247.658	79.9391	-557.482		1000000031	49.3481	136.928	-282.496
1000000964	142.641	173.505	213.263		1000000368	268.446	38.5139	-1115.79		1000000176	245.606	79.1524	-561.362		1000000031	49.0862	136.939	-282.263
1000000964	141.928	173.208	212.651		1000000368	267.727	38.3388	-1113.86		1000000176	246.501	79.3529	-560.59		1000000031	48.8732	136.779	-282.08
1000000964	141.462	172.927	212.685		1000000368	267.845	38.1282	-1115.28		1000000176	247.367	79.3541	-557.902		1000000031	49.0372	136.465	-281.861
1000000964	141.417	172.725	213.13		1000000368	269.099	38.4119	-1112.44		1000000192	184.871	154.232	-573.642		1000000031	49.1642	136.075	-282.215
1000000964	140.497	171.767	215.865		1000000368	266.671	39.0296	-1118.93		1000000192	185.062	154.216	-576.633		1000000031	49.1616	136.779	-282.066
1000000964	141.566	171.883	213.428		1000000368	268.791	38.36	-1116.35		1000000192	184.519	153.974	-577.055		1000000031	49.0575	136.789	-282.08
1000000964	140.743	172.078	211.737		1000000368	265.551	39.1241	-1114.16		1000000192	184.177	153.399	-576.855		1000000031	49.0622	136.545	-282.07
1000000964	141.423	172.052	212.637		1000000368	267.584	38.399	-1113.78		1000000192	183.423	153.86	-576.108		1000000031	48.8755	136.527	-281.795
1000000964	141.013	172.762	213.489		1000000368	270.048	38.8419	-1114.55		1000000192	183.809	153.032	-578.686		1000000031	48.5906	137.034	-281.792
1000000964	140.891	172.375	213.347		1000000368	270.886	38.4304	-1114.89		1000000192	184.102	153.071	-582.21		1000000031	48.1498	137.401	-281.778
1000000964	140.66	172.133	212.688		1000000368	266.816	38.3859	-1110.78		1000000192	183.95	153.081	-582.21		1000000031	48.8713	137.523	-282.074
1000000964	141.378	172.469	214.427		1000000368	269.599	38.5591	-1114.83		1000000192	183.86	152.989	-582.21		1000000031	48.7007	137.235	-281.476
1000000964	141.185	172.349	213.333		1000000368	269.978	38.2587	-1114.08		1000000192	184.101	153.607	-579.609		1000000031	49.2017	137.268	-281.774
1000000964	141.234	172.232	212.768		1000000368	266.913	37.947	-1114.27		1000000192	184.143	153.949	-582.21		1000000031	49.0905	136.483	-281.715
1000000964	140.851	171.879	210.718		1000000368	268.689	38.3816	-1114.57		1000000192	184.531	153.254	-582.21		1000000031	48.546	137.354	-281.843
1000000964	141.206	171.63	214.222		1000000368	270.654	38.7994	-1113.87		1000000192	183.523	153.443	-582.21		1000000031	48.9988	137.579	-282.373
1000000964	141.676	171.542	213.849		1000000368	270.56	39.0686	-1114.84		1000000192	183.977	153.384	-578.559		1000000031	48.3352	137.455	-281.804
1000000964	141.247	171.235	216.292		1000000368	270.914	38.8332	-1114.83		1000000192	183.433	152.903	-582.21		1000000031	48.7733	137.176	-282.096
1000000964	141.627	171.302	211.674		1000000368	267.715	37.9	-1114.45		1000000192	183.353	153.502	-582.21		1000000031	48.7899	136.839	-282.272
1000000964	146.472	168.295	217.6		1000000368	269.386	37.3438	-1112.2		1000000192	183.583	153.201	-582.21		1000000031	49.2462	136.923	-282.126
1000000964	145.943	168.661	217.083		1000000368	270.447	38.1575	-1111.59		1000000192	183.64	153.545	-582.21		1000000031	48.7356	136.856	-282.203
1000000964	145.762	168.858	216.331		1000000368	271.552	38.4263	-1113.13		1000000192	183.849	153.616	-582.21		1000000031	48.0547	136.736	-282.454
1000000964	147.699	168.263	217.867		1000000368	269.966	38.1433	-1114.28		1000000192	183.26	153.654	-582.21		1000000031	48.7296	136.942	-282.698
1000000964	148.795	167.408	217.494		1000000368	269.954	38.322	-1114.2		1000000192	184.61	153.986	-582.21		1000000031	48.1529	137.073	-282.566
1000000964	150.139	167.139	217.03		1000000368	271.249	37.9215	-1114.18		1000000192	183.876	153.171	-582.21		1000000031	48.2297	137.278	-281.608
1000000964	150.8	166.931	216.735		1000000368	273.876	38.6258	-1113.15		1000000192	183.446	152.993	-582.21		1000000031	48.2507	137.134	-281.987
1000000964	150.787	167.202	215.73		1000000368	271.425	37.6693	-1113.41		1000000192	183.534	153.007	-582.21		1000000031	48.8112	136.545	-282.04
1000000964	151.619	166.784	216.238		1000000368	271.169	38.4031	-1114.01		1000000192	183.111	152.772	-582.21		1000000031	48.88	137.068	-282.143
1000000964	152.096	167.064	213.892		1000000368	272.585	38.2789	-1115.92		1000000192	182.945	153.287	-582.21		1000000031	48.7067	137.005	-282.24
1000000964	152.709	166.661	215.601		1000000368	270.169	38.2825	-1115.44		1000000192	183.171	154.006	-582.21		1000000031	48.7013	137.59	-282.334
1000000964	151.763	166.783	213.922		1000000368	270.625	38.0244	-1114.22		1000000192	183.247	153.802	-582.21		1000000031	48.4814	136.95	-283.171
1000000964	152.519	166.807	216.835		1000000368	270.615	38.1211	-1111.96		1000000192	184.081	153.793	-582.21		1000000031	48.4853	136.898	-282.594
1000000964	155.208	165.588	217.815		1000000368	271.398	38.1791	-1111.31		1000000192	184.078	153.309	-582.21		1000000038	41.673	48.1844	-277.902
1000000964	153.358	166.036	217.86		1000000368	271.438	38.0364	-1115.53		1000000192	183.418	154.217	-582.21		1000000038	42.2212	49.1778	-278
1000000964	153.733	166.985	217.085		1000000368	271.484	37.9222	-1115.99		1000000192	183.132	154.116	-582.21		1000000038	42.1126	48.3985	-279.347
1000000964	154.546	166.197	217.397		1000000368	272.238	37.7217	-1115.24		1000000192	183.438	154.178	-582.21		1000000038	39.848	45.0337	-278.408
1000000964	152.912	166.495	213.871		1000000368	273.24	38.0687	-1115.34		1000000192	183.667	154.107	-582.21		1000000038	39.3642	44.4641	-278.023
1000000964	153.061	166.154	213.176		1000000368	271.316	37.9196	-1110.59		1000000192	183.106	153.565	-582.21		1000000038	41.5505	46.1934	-280.747
1000000964	152.725	165.372	208.498		1000000368	271.966	37.3034	-1110.97		1000000192	182.859	153.62	-582.21		1000000038	40.5795	44.9694	-281.552
1000001037	175.521	208.656	205.13		1000000368	272.509	38.4773	-1113.42		1000000192	182.378	153.281	-582.21		1000000038	40.283	46.1379	-281.932
1000001037	175.71	209.135	208.167		1000000368	271.71	38.3875	-1113.8		1000000192	182.953	153.205	-582.21		1000000038	40.246	45.3134	-281.676
1000001037	175.854	208.78	208.492		1000000368	272.546	37.5843	-1113.31		1000000192	183.193	153.561	-582.21		1000000038	40.5965	45.6664	-281.905
1000001037	175.712	208.864	207.331		1000000368	271.024	37.2471	-1113.54		1000000192	183.401	154.123	-582.21		1000000038	40.0984	44.7088	-282.121
1000001037	175.323	208.936	207.927		1000000368	272.577	37.1975	-1111.54		1000000192	182.664	154.61	-582.21		1000000038	41.7502	45.1296	-282.046
1000001037	176.526	209.572	208.419		1000000368	271.336	38.4115	-1111		1000000192	182.897	154.498	-582.21		1000000038	40.9543	45.3372	-282.19
1000001037	175.344	208.442	207.024		1000000368	271.06	37.9324	-1111.35		1000000192	182.928	153.714	-582.21		1000000038	41.0493	44.3508	-282.278
1000001037	175.958	208.705	206.195		1000000368	271.977	38.1833	-1111.57		1000000192	182.924	153.567	-582.21		1000000038	40.6016	43.9228	-281.845
1000001037	175.545	208.855	208.254		1000000368	272.156	38.2016	-1113.65		1000000192	182.186	153.386	-582.21		1000000038	39.9274	44.5292	-282.111
1000001037	175.953	208.533	204.057		1000000368	272.513	37.2964	-1110.25		1000000192	182.356	153.781	-582.21		1000000038	40.9982	45.3664	-281.812
1000001037	175.548	209.236	205.972		1000000368	272.223	37.5117	-1110.2		1000000192	183.16	154.038	-582.21		1000000038	41.4994	44.554	-281.957
1000001037	175.42	208.61	207.09		1000000368	273.503	37.0849	-1111.02		1000000192	182.86	154.224	-582.21		1000000038	40.9104	44.6321	-282.107
1000001037	175.231	208.574	207.731		1000000368	271.967	37.2236	-1109.09		1000000192	182.742	154.378	-582.21		1000000038	41.2997	44.8277	-282.165
1000001037	175.426	208.482	207.345		1000000368	272.256	37.2637	-1110.59		1000000192	182.614	154.673	-582.21		1000000038	40.6286	45.5076	-281.876
1000001037	175.555	208.33	203.064		1000000368	272.157	37.667	-1110.93		1000000192	182.831	154.337	-582.21		1000000038	40.515	44.1073	-281.935
1000001037	174.916	208.621	206.132		1000000368	272.276	36.938	-1111.9		1000000192	182.654	154.248	-582.21		1000000038	40.4546	44.5152	-281.94
1000001037	175.247	208.939	206.099		1000000368	272.39	38.1464	-1113.58		1000000192	183.245	154.269	-582.21		1000000038	41.2072	44.9542	-281.772
1000001037	175.029	208.743	206.223		1000000368	273.373	38.0373	-1113.54		1000000192	182.841	153.786	-582.21		1000000038	41.2675	44.2229	-281.567
1000001037	175.563	209.045	207.561		1000000368	273.018	37.4212	-1114.29		1000000192	182.812	154.323	-582.21		1000000038	41.7804	44.445	-281.978
1000001037	176.021	209.179	207.152		1000000368	273.233	38.0659	-1113.75		1000000192	182.698	154.403	-582.21		1000000038	41.9029	45.0315	-281.921
1000001037	177.231	208.277	203.017		1000000368	273.337	37.6232	-1114.23		1000000192	183.004	154.306	-582.21		1000000038	41.083	44.0867	-281.638
1000001037	177.057	207.865	204.175		1000000368	272.877	37.551	-1113.96		1000000192	183.033	154.735	-582.21		1000000038	42.3254	44.533	-281.914
1000001037	175.987	208.779	203.257		1000000368	271.963	38.0082	-1113.59		1000000192	182.961	155.215	-582.21		1000000038	41.6006	44.2303	-281.695
1000001037	176.576	207.872	203.638		1000000368	273.388	38.3159	-1114.6		1000000192	182.991	154.675	-582.21		1000000038	41.6008	43.8367	-281.711
1000001037	175.841	208.123	203.619		1000000368	273.091	38.448	-1113.72		1000000192	183.234	154.687	-582.21		1000000038	41.1773	43.7471	-281.367
1000001037	175.822	208.616	206.013		1000000368	272.834	37.7903	-1114.35		1000000192	182.485	154.283	-582.21		1000000038	41.8785	44.6644	-281.792
1000001037	175.788	209.385	206.187		1000000368	273.327	37.8138	-1114.71		1000000192	181.872	154.941	-582.21		1000000038	42.0776	44.3491	-282.046
1000001037	176.363	208.367	204.049		1000000368	272.167	37.8255	-1112.22		1000000192	182.236	155.178	-582.21		1000000038	41.1427	43.6116	-282.023
1000001037	175.374	208.811	206.205		1000000368	272.768	37.8235	-1113.18		1000000192	182.13	154.85	-582.21		1000000038	41.5498	44.4864	-282.187
1000001037	177.522	207.764	203.892		1000000368	273.176	38.3929	-1114.18		1000000192	182.523	154.811	-582.21		1000000038	41.4316	43.3295	-282.122
1000001037	176.594	208.049	203.783		1000000368	271.858	38.3159	-1108.96		1000000192	182.299	154.664	-578.227		1000000038	40.8458	43.4193	-282.232
1000001037	175.847	208.5	205.13		1000000368	272.697	38.7691	-1109.31		1000000192	182.196	154.13	-579.173		1000000038	41.5517	44.3262	-282.028
1000001037	176.518	208.169	204.248		1000000368	272.536	37.6351	-1108.9		1000000192	182.725	154.669	-582.21		1000000038	40.8139	43.2456	-281.882
1000001037	176.222	208.965	205.733		1000000368	270.411	37.5695	-1111.88		1000000192	182.525	153.935	-579.29		1000000038	41.2535	43.7343	-282.295
1000001037	177.399	208.184	203.693		1000000368	272.758	38.624	-1114.25		1000000192	183.258	154.697	-578.853		1000000038	40.5508	43.3533	-282.328
1000001037	175.518	208.901	206.284		1000000368	271.495	37.3984	-1112.79		1000000192	183.468	154.689	-582.21		1000000038	40.8407	43.7904	-282.177
1000001037	177.122	207.667	204.063		1000000368	271.995	37.1325	-1109.22		1000000192	183.117	155.28	-582.21		1000000038	40.2299	44.4732	-282.166
1000001037	176.321	207.909	203.364		1000000368	271.92	37.7129	-1108.31		1000000192	182.337	154.638	-579.191		1000000038	39.9923	43.3207	-282.347
1000001037	176.887	208.075	203.405		1000000368	271.968	38.3893	-1109.54		1000000192	182.652	155.426	-579.159		1000000038	41.1984	43.5716	-282.588
1000001037	176.663	208.177	203.728		1000000368	272.398	37.7193	-1109.55		1000000192	182.683	155.257	-582.21		1000000038	41.2754	44.1398	-282.348
1000001037	175.971	208.007	205.416		1000000368	271.503	37.9342	-1109.19		1000000192	182.69	155.148	-582.21		1000000038	40.3738	43.4572	-281.815
1000001037	176.665	207.472	203.684		1000000368	271.337	37.7217	-1109.47		1000000192	182.954	154.75	-578.673		1000000038	40.9515	42.9566	-282.425
1000001037	175.626	208.455	206.617		1000000368	272.5	37.969	-1109.75		1000000192	182.17	155.002	-578.141		1000000038	40.6387	44.49	-282.401
1000001037	177.192	207.961	204.052		1000000399	330.644	0	-1086.58		1000000192	183.088	154.729	-578.06		1000000038	40.4914	43.5817	-282.618
1000001037	176.86	207.57	203.664		1000000399	330.503	0	-1087.09		1000000192	182.304	155.409	-577.595		1000000038	39.867	43.3749	-282.497
1000001037	176.794	208.253	203.466		1000000399	330.122	0	-1088.61		1000000192	182.59	155.129	-582.21		1000000038	39.4431	43.1808	-282.069
1000001037	176.348	207.36	203.377		1000000399	330.354	0	-1087.99		1000000192	181.797	154.867	-578.722		1000000038	40.075	43.5403	-281.691
1000001037	176.852	207.279	203.494		1000000399	330.037	0	-1086.47		1000000192	183.285	155.184	-579.149		1000000038	40.4134	43.6243	-282.146
1000001037	176.363	208.333	203.271		1000000399	330.681	0.622768	-1087.19		1000000192	182.411	155.037	-578.34		1000000038	40.8265	43.271	-281.879
1000001037	176.375	207.827	202.187		1000000399	329.424	0	-1084.53		1000000192	182.161	155.176	-577.64		1000000038	40.702	43.9796	-282.372
1000001037	177.371	208.155	203.286		1000000399	329.459	0	-1086.09		1000000192	182.798	155.929	-577.955		1000000038	40.2527	43.47	-282.216
1000001037	176.58	208.538	202.125		1000000399	329.85	0	-1088.5		1000000192	182.932	155.643	-577.271		1000000038	40.0431	43.4448	-282.355
1000001037	176.652	207.732	202.736		1000000399	330.192	1.10564	-1089.93		1000000192	183.154	155.42	-577.664		1000000038	40.5498	43.512	-282.346
1000001037	176.967	208.71	201.421		1000000399	329.61	0	-1090.03		1000000192	182.863	155.782	-577.319		1000000038	40.4946	42.9174	-282.829
1000001037	176.654	208.122	202.452		1000000399	330.828	1.62322	-1089.51		1000000192	182.973	155.294	-577.386		1000000038	41.4239	43.1912	-282.454
1000001037	176.531	208.412	203.549		1000000399	331.703	0	-1089.8		1000000192	182.479	155.7	-577.443		1000000038	40.1066	43.8678	-282.217
1000001037	176.519	208.162	203.308		1000000399	331.233	0	-1086.1		1000000192	183.387	155.735	-577.791		1000000038	39.8398	43.0811	-282.372
1000001037	177.077	207.953	203.654		1000000399	331.433	0	-1085.77		1000000192	182.806	155.827	-577.349		1000000038	40.3174	43.6589	-282.268
1000001037	176.318	209.111	203.414		1000000399	333.087	2.40923	-1090.69		1000000192	182.895	156.017	-576.273		1000000038	40.9183	43.4087	-282.449
1000001037	176.943	207.609	203.351		1000000399	331.12	3.39834	-1090.35		1000000192	183.008	155.593	-577.351		1000000038	40.6919	43.6059	-282.318
1000001037	176.358	207.935	203.497		1000000399	329.884	3.4423	-1087.14		1000000192	182.21	155.634	-576.456		1000000038	40.6705	43.5785	-282.456
1000001037	176.997	208.718	201.628		1000000399	329.896	2.60242	-1090.33		1000000192	182.461	156.375	-576.748		1000000038	40.5365	43.3747	-282.741
1000001037	176.956	207.993	202.286		1000000399	329.638	2.9952	-1089.54		1000000192	182.206	156.051	-576.874		1000000038	39.9102	42.8308	-283.037
1000001037	176.484	208.53	200.562		1000000399	327.392	3.47035	-1090.17		1000000192	182.369	155.458	-577.561		1000000038	40.8699	43.5073	-282.747
1000001037	176.351	208.601	202.155		1000000399	327.25	3.52754	-1090.67		1000000192	182.479	155.794	-576.923		1000000038	40.6614	43.6158	-284.038
1000001037	176.864	208.786	201.136		1000000399	326.72	0	-1090.48		1000000192	182.527	156.038	-576.986		1000000038	41.1567	43.9131	-285.761
1000001037	176.381	207.999	201.609		1000000399	325.362	2.73726	-1091.21		1000000192	183.133	155.508	-576.218		1000000038	39.7431	43.1673	-283.747
1000001037	176.515	207.965	202.265		1000000399	324.098	1.46098	-1093.34		1000000192	182.843	155.244	-574.676		1000000038	41.4149	44.3303	-286.013
1000001037	176.361	207.977	201.191		1000000399	325.496	3.03895	-1093.64		1000000192	182.562	155.166	-575.799		1000000038	39.8682	43.0325	-283.529
1000001037	176.342	208.064	202.723		1000000399	325.118	0	-1094.84		1000000192	182.502	155.132	-575.795		1000000038	40.247	43.6998	-283.364
1000001039	217.56	222.684	204.949		1000000399	322.503	3.51045	-1094.33		1000000192	182.056	155.196	-575.643		1000000038	40.7739	43.4539	-282.646
1000001039	218.874	222.389	203.48		1000000399	318.617	4.52848	-1095		1000000192	182.257	155.506	-576.542		1000000038	39.8923	42.9133	-282.467
1000001039	218.236	222.875	205.348		1000000399	317.878	3.6726	-1094.9		1000000192	181.778	155.249	-575.855		1000000038	40.7668	43.1086	-282.454
1000001039	218.305	222.486	203.254		1000000399	320.401	3.34181	-1094.22		1000000192	181.733	156.065	-573.006		1000000038	40.5021	44.1122	-282.561
1000001039	218.572	222.991	203.056		1000000399	323.243	0	-1092.5		1000000192	182.092	156.306	-572.805		1000000038	40.9457	43.9014	-282.746
1000001039	218.911	222.891	203.906		1000000399	321.518	1.03038	-1094.75		1000000192	182.415	156.13	-572.715		1000000038	41.0127	43.548	-283.964
1000001039	218.317	223.122	202.917		1000000399	324.389	1.08245	-1095.87		1000000192	181.624	156.099	-572.554		1000000038	40.9181	43.5773	-282.989
1000001039	218.208	222.917	202.587		1000000399	325.711	3.06247	-1095.2		1000000192	182.832	155.927	-573.595		1000000038	41.1692	43.6604	-282.666
1000001039	218.352	222.822	203.787		1000000399	325.216	3.43159	-1090.34		1000000192	181.97	156.033	-575.32		1000000038	40.6451	44.0355	-283.501
1000001039	216.87	222.85	203.987		1000000399	326.862	3.25482	-1094.73		1000000192	182.738	156.126	-575.59		1000000038	40.2703	43.7575	-284.068
1000001039	217.863	223.253	203.136		1000000399	325.159	2.52831	-1091.65		1000000192	182.861	155.915	-572.634		1000000038	41.3301	44.3483	-281.24
1000001039	217.446	223.334	203.588		1000000399	325.054	2.65158	-1095.41		1000000192	183.151	156.381	-572.467		1000000038	42.5393	44.7405	-281.402
1000001039	218.006	223.221	203.702		1000000399	323.895	3.09351	-1095.74		1000000192	182.399	155.883	-571.865		1000000038	41.4525	43.9331	-281.374
1000001039	217.919	222.852	202.381		1000000399	322.78	2.08735	-1094.89		1000000192	183.732	156.131	-572.737		1000000038	41.475	43.9411	-281.62
1000001039	217.021	223.392	201.1		1000000399	323.321	0	-1093.99		1000000192	182.551	156.279	-573.023		1000000038	41.9408	44.2889	-281.688
1000001039	217.374	223.331	202.156		1000000399	322.163	3.19974	-1093.96		1000000192	182.843	155.278	-573.275		1000000038	41.9188	43.9092	-282.103
1000001039	217.12	223.441	202.258		1000000399	324.316	3.29754	-1094.92		1000000192	182.633	155.699	-573.024		1000000038	41.4749	44.3491	-280.495
1000001039	217.547	223.388	201.924		1000000399	324.567	3.43737	-1088.8		1000000192	182.523	155.675	-572.786		1000000038	41.7251	43.8358	-281.455
1000001039	217.577	223.229	202.849		1000000399	324.742	3.25614	-1096.76		1000000192	181.641	156.005	-572.693		1000000038	42.2052	44.1189	-282.241
1000001039	217.662	222.89	202.067		1000000399	322.446	2.96492	-1096.97		1000000192	182.031	156.468	-572.341		1000000038	42.5946	43.6942	-281.886
1000001039	216.927	223.081	202.805		1000000399	321.642	4.0136	-1092.76		1000000192	182.196	156.148	-572.211		1000000038	42.5209	44.3261	-282.107
1000001039	217.205	222.725	202.004		1000000399	321.771	0	-1091.99		1000000192	182.049	156.035	-572.453		1000000038	42.3421	43.9838	-281.749
1000001039	218.378	222.797	198.224		1000000399	321.659	3.15469	-1094.78		1000000192	181.796	155.496	-574.26		1000000038	40.936	43.1359	-281.243
1000001039	217.18	222.92	201.38		1000000399	322.366	3.61451	-1093.91		1000000192	181.809	155.2	-573.404		1000000038	41.4383	43.4321	-281.677
1000001039	216.526	222.834	202.412		1000000399	323.055	4.19709	-1094.49		1000000192	182.229	155.785	-572.363		1000000038	41.6453	44.2122	-281.853
1000001039	217.285	222.998	201.885		1000000399	322.825	3.75005	-1094.51		1000000192	182.443	156.014	-572.173		1000000038	39.0845	42.3567	-279.322
1000001039	217.49	222.692	201.966		1000000399	322.913	3.65789	-1095.94		1000000192	181.691	156.673	-572.482		1000000038	40.3122	43.1247	-281.378
1000001039	216.812	222.664	202.181		1000000399	323.643	3.30268	-1095.81		1000000192	182.09	156.512	-572.389		1000000038	40.6398	43.5327	-280.913
1000001039	217.107	223.163	202.464		1000000399	324.171	4.06915	-1099.13		1000000192	183.266	156.586	-571.863		1000000038	40.4218	43.1134	-280.468
1000001039	217.128	222.634	201.342		1000000399	324.52	3.8671	-1097.52		1000000192	182.3	156.432	-572.613		1000000038	40.4694	43.3512	-281.632
1000001039	216.797	222.556	202.217		1000000399	325.582	4.30881	-1100.01		1000000192	182.683	155.772	-573.213		1000000038	40.3082	43.2888	-281.161
1000001039	216.635	222.841	202.812		1000000399	324.257	4.18956	-1097.23		1000000192	182.69	155.425	-573.283		1000000038	40.6185	43.6768	-281.087
1000001039	216.957	222.946	200.891		1000000399	324.588	4.16016	-1096.63		1000000192	182.209	155.948	-573.422		1000000038	40.493	41.4581	-279.324
1000001039	217.082	222.174	202.57		1000000399	324.055	4.46326	-1099.63		1000000192	182.178	155.771	-572.784		1000000038	39.4388	41.2064	-279.283
1000001039	216.728	221.427	202.314		1000000399	325.057	4.81223	-1100.25		1000000192	182.932	155.663	-574.231		1000000038	40.5105	42.1933	-280.735
1000001039	216.981	221.168	202.284		1000000399	325.267	4.98699	-1099.85		1000000192	182.067	156.377	-572.365		1000000038	39.4888	40.6468	-279.056
1000001039	216.673	220.665	202.604		1000000399	325.624	5.00844	-1101.33		1000000192	182.908	155.896	-572.159		1000000038	39.6685	42.5742	-280.796
1000001039	216.379	218.402	201.555		1000000399	326.491	5.99107	-1104.57		1000000192	183.356	155.588	-572.265		1000000038	39.1209	43.0754	-281.13
1000001039	216.577	219.807	202.331		1000000399	327.717	6.21283	-1108.15		1000000192	183.313	154.974	-572.406		1000000038	39.5654	42.7202	-281.333
1000001039	216.451	221.033	202.182		1000000399	327.716	6.30255	-1105.9		1000000192	183.039	155.099	-571.795		1000000038	40.1724	43.3141	-280.882
1000001039	216.329	221.507	203.333		1000000399	328.165	5.41763	-1106.34		1000000192	183.034	154.763	-572.05		1000000038	38.7887	42.1653	-278.986
1000001039	216.344	219.283	202.887		1000000399	327.824	6.02426	-1105.66		1000000192	182.997	154.62	-572.159		1000000038	40.2556	41.9763	-279.903
1000001039	216.712	220.929	203.118		1000000399	328.288	6.39001	-1106.98		1000000192	183.382	155.355	-571.705		1000000038	39.0162	42.6296	-279.604
1000001039	216.338	221.569	202.065		1000000399	328.13	7.06543	-1109.09		1000000192	183.712	155.033	-571.209		1000000038	38.9616	42.4135	-278.711
1000001039	216.526	221.009	201.999		1000000399	328.262	7.20104	-1109		1000000192	182.982	155.759	-575.79		1000000038	39.0797	41.949	-278.651
1000001039	216.197	220.319	201.696		1000000399	327.555	7.76474	-1105.09		1000000192	182.282	155.326	-573.913		1000000038	40.032	41.1166	-279.527
1000001039	216.355	217.828	202.52		1000000399	328.075	6.96551	-1105.34		1000000192	182.216	156.533	-571.685		1000000038	38.4148	41.0108	-277.8
1000001039	215.994	221.056	202.384		1000000399	327.802	7.20103	-1109.68		1000000192	182.566	155.738	-576.013		1000000038	39.1044	42.0037	-277.549
1000001039	215.285	222.376	201.656		1000000399	327.793	7.37151	-1110.48		1000000192	182.464	155.927	-576.118		1000000038	39.5787	41.7907	-278.385
1000001039	216.26	220.694	198.867		1000000399	328.002	7.10503	-1110.61		1000000192	182.492	155.79	-576.664		1000000038	38.9143	42.634	-278.471
1000001039	216.03	219.765	201.778		1000000399	327.947	7.43593	-1110.06		1000000192	183.07	155.995	-576.02		1000000038	39.7732	42.5348	-279.684
1000001039	215.396	220.716	201.382		1000000399	327.261	6.60006	-1105.37		1000000192	181.347	154.749	-573.403		1000000038	40.3921	42.3451	-280.103
1000001039	215.365	220.494	201.914		1000000399	327.112	6.77246	-1105.29		1000000192	182.295	156.057	-573.663		1000000038	39.2485	41.7485	-278.604
1000001039	216.247	220.568	197.531		1000000399	326.611	6.92736	-1106.8		1000000192	182.04	155.425	-574.283		1000000038	39.2598	42.4852	-279.146
1000001039	215.632	220.878	202.173		1000000399	327.132	7.24243	-1108.13		1000000192	182.428	155.343	-574.34		1000000038	39.4142	42.197	-277.592
1000001039	215.331	219.634	202.207		1000000399	327.176	6.51742	-1105.63		1000000192	182.431	155.858	-573.318		1000000038	38.8731	43.3039	-278.008
1000001039	215.908	219.886	201.271		1000000399	327.212	6.32654	-1105.87		1000000192	182.564	155.373	-573.926		1000000038	39.0703	43.831	-278.87
1000001039	215.727	220.926	202.49		1000000399	328.245	6.17127	-1104.86		1000000192	182.269	155.496	-572.11		1000000038	39.7066	44.0803	-278.061
1000001039	215.82	221.035	201.899		1000000399	327.975	6.17734	-1105.46		1000000192	182.492	155.501	-572.544		1000000038	39.1275	43.0394	-277.85
1000001039	213.233	221.305	205.79		1000000399	327.43	6.85681	-1105.29		1000000192	182.741	156.081	-572.737		1000000038	38.9617	41.6626	-278.982
1000001039	215.586	220.356	201.331		1000000399	326.927	7.92931	-1105.71		1000000192	182.45	156.08	-572.777		1000000038	39.7554	43.3538	-279.863
1000001039	216.651	221.449	198.705		1000000399	326.813	7.23454	-1106.76		1000000192	182.394	156.377	-572.945		1000000038	40.0478	43.3946	-280.43
1000001039	216.688	220.924	198.51		1000000399	326.233	7.6912	-1105.64		1000000192	182.8	155.911	-572.23		1000000038	39.639	42.0449	-278.246
1000001039	214.477	222.316	201.565		1000000399	327.264	7.48053	-1108.06		1000000192	182.449	155.986	-573.361		1000000038	40.051	43.0335	-280.22
1000001039	215.22	221.044	200.832		1000000399	326.96	6.98136	-1107.14		1000000192	183.142	156.524	-575.512		1000000038	40.7501	44.5756	-280.828
1000001039	216.305	220.978	197.93		1000000399	325.999	7.81118	-1106.17		1000000192	183.456	156.164	-575.846		1000000038	39.9872	42.5875	-277.895
1000001039	215.486	221.246	200.46		1000000399	326.157	8.07056	-1106.66		1000000192	182.365	155.781	-575.834		1000000038	39.7745	40.879	-277.614
1000001039	216.744	220.598	198.057		1000000399	325.966	8.01019	-1107.06		1000000192	183.847	156.499	-576.552		1000000038	38.9663	41.5947	-277.676
1000001039	216.467	221.287	198.346		1000000399	323.889	7.65794	-1107.56		1000000192	182.872	155.801	-573.686		1000000038	38.3741	40.7755	-276.553
1000001039	215.248	220.503	202.234		1000000399	324.552	8.26279	-1109.07		1000000192	182.57	155.128	-572.606		1000000038	39.3488	41.6481	-275.235
1000001039	215.964	221.188	199.099		1000000399	323.978	8.53449	-1109.04		1000000192	183.202	155.445	-572.977		1000000038	40.2043	42.4117	-277.423
1000001039	216.491	220.995	197.587		1000000399	323.827	8.2893	-1110.31		1000000192	182.947	155.275	-573.147		1000000038	39.8417	42.1878	-277.854
1000001039	215.012	219.769	202.065		1000000399	323.664	8.07315	-1108.6		1000000192	183.504	155.442	-576.158		1000000038	39.5284	41.4012	-277.522
1000001039	215.323	219.833	201.658		1000000399	323.386	7.87519	-1109.97		1000000192	182.741	155.384	-572.981		1000000038	39.3832	41.9371	-278.525
1000001039	216.28	220.446	197.543		1000000399	323.71	7.98368	-1110.03		1000000192	182.916	155.119	-572.127		1000000038	39.5886	42.4788	-279.215
1000001039	215.934	221.072	197.806		1000000399	323.87	7.46349	-1109.47		1000000192	183.082	157.13	-572.099		1000000038	39.4423	43.1713	-278.353
1000001039	215.901	220.245	198.969		1000000399	324.035	8.14026	-1110.85		1000000192	183.202	156.368	-572.237		1000000038	39.8098	42.0987	-280.151
1000001039	216.154	221.727	198.906		1000000399	323.717	8.0631	-1109.84		1000000192	182.722	156.738	-571.193		1000000038	39.7355	43.3049	-278.125
1000001039	214.805	220.588	201.003		1000000399	323.677	7.48528	-1110.33		1000000192	182.744	156.426	-571.444		1000000038	39.7279	42.3174	-278.243
1000001039	215.719	220.458	197.514		1000000399	324.181	7.43265	-1109.86		1000000192	183.277	155.566	-572.149		1000000038	39.1454	42.2362	-278.151
1000001039	215.934	220.664	196.048		1000000399	324.178	7.94801	-1109.84		1000000192	182.774	155.036	-573.26		1000000038	39.4424	41.4153	-277.99
1000001039	214.946	219.593	201.515		1000000399	323.433	7.51297	-1109.86		1000000192	182.607	155.114	-571.832		1000000038	39.3823	40.966	-278.336
1000001039	216.058	219.629	198.403		1000000399	323.765	7.09153	-1110.02		1000000192	183.418	156.823	-571.989		1000000038	39.1573	42.0873	-277.701
1000001039	215.874	220.355	199.24		1000000399	323.573	7.23954	-1105.78		1000000192	183.933	155.419	-572.206		1000000038	38.8264	42.1053	-276.789
1000001039	214.692	220.76	201.06		1000000399	322.938	7.53244	-1105.18		1000000192	183.332	155.751	-572.636		1000000038	38.0659	41.4701	-277.747
1000001039	214.866	220.411	200.722		1000000399	323.948	6.335	-1105.4		1000000192	183.57	155.748	-575.454		1000000038	39.0921	42.0473	-277.683
1000001039	215.481	220.939	198.729		1000000399	324.234	5.79436	-1110.3		1000000192	182.631	155.894	-575.68		1000000038	39.1789	43.0498	-277.811
1000001039	215.857	221.118	198.59		1000000399	324.282	6.09384	-1112.17		1000000192	182.848	155.207	-573.841		1000000038	39.2146	42.3988	-277.422
1000001039	216.33	221.433	197.401		1000000399	324.422	4.98131	-1110.45		1000000192	183.025	155.189	-572.739		1000000038	39.3448	43.3634	-277.633
1000001039	215.626	220.187	198.285		1000000399	323.569	4.36109	-1105.13		1000000192	182.998	155.68	-575.358		1000000038	39.0016	42.1763	-278.874
1000001039	214.626	220.882	201.065		1000000399	324.279	4.28979	-1106.68		1000000192	183.034	154.925	-572.825		1000000038	39.0992	41.9664	-277.668
1000001039	216.125	220.871	198.616		1000000482	78.0013	155.253	-1101.86		1000000192	182.6	155.551	-573.407		1000000066	300.373	103.832	-292.21
1000001039	215.732	221.025	197.713		1000000482	78.7972	155.403	-1104.24		1000000192	182.961	155.925	-576.999		1000000066	300.785	104.6	-292.21
1000001039	215.165	220.579	201.455		1000000482	78.5994	155.887	-1104.46		1000000192	183.117	154.436	-574.264		1000000066	301.828	103.885	-292.21
1000001039	215.777	220.564	198.044		1000000482	79.0682	155.001	-1104.65		1000000192	183.099	155.264	-575.724		1000000066	301.014	104.342	-292.21
1000001039	215.893	221.331	198.144		1000000482	80.0173	154.139	-1104.32		1000000192	182.708	156.14	-575.198		1000000066	302.991	103.767	-292.21
1000001039	215.834	220.492	196.755		1000000482	81.0239	154.005	-1104.1		1000000192	182.367	155.531	-574.305		1000000066	303.566	103.008	-292.21
1000001039	216.42	220.944	198.964		1000000482	81.3805	153.932	-1104.64		1000000192	182.736	155.647	-575.356		1000000066	302.733	103.769	-292.21
1000001039	216.478	221.021	198.173		1000000482	81.099	153.443	-1104.13		1000000192	182.433	154.626	-573.167		1000000066	304.147	103.155	-292.21
1000001039	215.538	220.234	198.321		1000000482	81.1353	152.872	-1103.88		1000000192	182.82	155.885	-575.023		1000000066	304.254	103.814	-292.21
1000001039	216.568	220.922	197.488		1000000482	80.7472	153.862	-1104.45		1000000192	183.421	155.793	-576.09		1000000066	303.016	104.752	-292.21
1000001039	215.549	220.928	197.708		1000000482	80.5283	152.671	-1105.12		1000000192	182.758	155.527	-576.222		1000000066	302.987	104.509	-292.21
1000001039	216.6	221.035	198.687		1000000482	80.5157	151.996	-1105.62		1000000192	183.315	156.378	-571.636		1000000066	302.824	105.074	-292.21
1000001039	214.441	220.49	201.562		1000000482	81.5782	150.071	-1103.69		1000000192	182.305	155.512	-573.099		1000000066	301.792	105.402	-292.21
1000001039	216.546	220.201	198.766		1000000482	82.0158	150.759	-1104.04		1000000192	182.615	154.891	-572.723		1000000066	301.55	105.19	-292.21
1000001039	214.976	220.538	198.124		1000000482	81.9213	150.759	-1103.2		1000000192	183.182	156.53	-572.773		1000000066	301.817	105.189	-292.21
1000001039	214.785	220.134	201.695		1000000482	82.3275	151.095	-1104.24		1000000192	183.108	155.722	-572.563		1000000066	301.946	105.408	-292.21
1000001039	216.548	219.828	197.682		1000000482	82.3403	151.637	-1104.98		1000000192	182.878	155.768	-572.908		1000000066	301.433	107.431	-292.21
1000001039	214.905	220.184	201.466		1000000482	82.3734	152.124	-1104.76		1000000192	183.175	155.37	-573.748		1000000066	301.96	106.9	-292.21
1000001039	216.326	220.814	198.212		1000000482	82.3487	151.62	-1105.11		1000000192	183.127	156.328	-575.803		1000000066	301.3	108.363	-292.21
1000001039	216.618	219.835	197.315		1000000482	82.1636	150.458	-1104.92		1000000192	182.486	155.708	-573.872		1000000066	301.905	108.547	-292.21
1000001039	216.119	219.317	199.011		1000000482	80.1293	147.977	-1108.66		1000000192	182.921	155.561	-572.163		1000000066	301.96	108.51	-292.21
1000001039	215.643	218.705	198.738		1000000482	78.7348	147.768	-1109.18		1000000310	122.643	275.038	-570.332		1000000066	301.836	110.741	-292.21
1000001039	215.762	220.276	202.923		1000000482	79.2047	146.558	-1109.65		1000000310	121.853	275.521	-571.984		1000000066	301.138	109.982	-292.21
1000001039	213.487	220.793	201.626		1000000482	78.1808	146.685	-1110.4		1000000310	121.628	274.8	-571.792		1000000066	301.841	110.862	-292.21
1000001039	216.253	220.376	197.271		1000000482	78.2957	147.033	-1110.89		1000000310	121.859	275.135	-572.111		1000000066	300.945	110.512	-292.21
1000001039	216.059	219.247	198.646		1000000482	76.7651	147.119	-1112.99		1000000310	121.733	273.434	-572.25		1000000066	301.13	110.58	-292.21
1000001039	215.578	220.183	197.567		1000000482	76.9963	146.858	-1114.08		1000000310	122.172	273.971	-576.539		1000000066	300.992	110.465	-292.21
1000001039	215.55	220.013	198.423		1000000482	78.3487	147.294	-1114.42		1000000310	122.506	273.365	-576.411		1000000066	300.643	110.225	-292.21
1000001039	216.024	220.924	198.077		1000000482	80.2721	146.154	-1114.3		1000000310	121.782	273.733	-578.314		1000000066	299.929	111.106	-292.21
1000001039	214.032	220.605	201.697		1000000482	80.6358	145.475	-1115		1000000310	122.673	274.133	-574.371		1000000066	301.385	109.88	-292.21
1000001039	215.935	219.988	199.008		1000000482	81.3698	146.069	-1114.46		1000000310	121.205	274.537	-576.207		1000000066	301.434	109.908	-292.21
1000001039	214.907	220.172	202.689		1000000482	80.6611	147.087	-1114.59		1000000310	121.631	274.361	-575.983		1000000066	301.463	110.616	-292.21
1000001039	215.377	219.909	203.348		1000000482	80.2709	147.536	-1114.7		1000000310	121.867	273.741	-575.269		1000000066	302.019	110.101	-292.21
1000001039	215.898	219.616	202.535		1000000482	79.4321	147.682	-1115.56		1000000310	120.971	274.65	-576.739		1000000066	302.964	111.754	-292.21
1000001039	215.495	220.216	197.79		1000000482	79.6789	147.134	-1116.51		1000000310	121.647	275.064	-576.591		1000000066	302.714	111.892	-292.21
1000001039	215.017	219.768	203.343		1000000482	79.865	147.012	-1115.23		1000000310	122.764	274.032	-575.719		1000000066	304.631	113.176	-292.21
1000001039	215.138	220.593	198.998		1000000482	80.7167	147.06	-1114.59		1000000310	121.899	274.212	-576.923		1000000066	308.009	113.29	-292.21
1000001039	215.141	219.662	202.242		1000000482	81.5004	146.014	-1113.89		1000000310	122.112	275.586	-576.862		1000000066	305.36	113.434	-292.21
1000001039	213.895	219.668	200.524		1000000482	81.8872	145.702	-1114.92		1000000310	122.536	273.963	-575.993		1000000066	305.495	112.827	-292.21
1000001039	213.58	217.712	206.706		1000000482	81.745	145.96	-1115.16		1000000310	122.243	274.667	-575.8		1000000066	306.363	113.714	-292.21
1000001039	215.216	219.733	203.481		1000000482	80.3941	146.263	-1114.39		1000000310	122.416	274.694	-575.524		1000000066	304.631	112.685	-292.21
1000001039	215.199	218.156	203.506		1000000482	79.5031	146.974	-1115.1		1000000310	122.595	274.243	-576.912		1000000091	289.904	119.97	-286.574
1000001039	215.013	218.388	203.239		1000000482	79.1406	146.526	-1110.65		1000000310	122.501	274.478	-575.887		1000000091	289.562	119.967	-287.209
1000001039	213.218	220.577	201.054		1000000482	79.9552	146.973	-1114.46		1000000310	122.218	274.832	-576.876		1000000091	289.492	119.827	-288.334
1000001039	215.362	220.516	203.073		1000000482	80.146	146.863	-1109.31		1000000310	122.17	274.445	-576.818		1000000091	290.031	119.846	-287.6
1000001039	214.383	220.228	202.721		1000000482	80.1822	147.29	-1114.37		1000000310	121.382	274.429	-576.628		1000000091	290.996	119.793	-287.219
1000001039	213.131	219.769	205.806		1000000482	80.1318	146.809	-1114.21		1000000310	121.832	273.616	-576.423		1000000091	291.263	119.507	-286.995
1000001039	214.774	219.453	202.346		1000000482	80.0219	146.897	-1110.03		1000000310	122.212	273.58	-576.385		1000000091	291.185	119.701	-287.261
1000001039	213.812	219.256	202.19		1000000482	80.3376	146.296	-1110.12		1000000310	122.201	273.988	-576.981		1000000091	290.444	119.522	-287.548
1000001039	214.604	220.904	202.112		1000000482	79.9471	147.085	-1111.31		1000000310	123.011	274.29	-576.055		1000000091	290.432	120.405	-288.671
1000001039	214.499	218.251	203.832		1000000482	79.5574	146.559	-1110.35		1000000310	122.344	274.343	-576.446		1000000091	290.367	120.256	-289.184
1000001039	215.073	218.942	202.59		1000000482	80.2256	147.36	-1108.41		1000000310	121.783	274.185	-577.835		1000000091	289.53	120.247	-289.628
1000001039	215.043	218.44	203.479		1000000482	80.2506	147.04	-1110.18		1000000310	121.057	274.955	-577.093		1000000091	289.623	120.053	-292.21
1000001039	213.996	218.39	204.279		1000000482	79.7501	146.995	-1110.02		1000000310	122.284	275.227	-576.629		1000000091	289.157	119.904	-292.21
1000001039	214.566	217.955	202.188		1000000482	79.3631	146.776	-1111.33		1000000310	121.409	274.148	-576.106		1000000091	288.959	120.046	-292.21
1000001039	214.318	218.441	202.231		1000000482	79.406	147.112	-1112.38		1000000310	122.041	274.149	-576.702		1000000091	289.329	119.507	-292.21
1000001039	214.816	217.21	202.865		1000000482	79.6856	147.376	-1111.44		1000000310	121.616	274.586	-577.536		1000000091	289.165	120.151	-289.341
1000001039	214.068	220.304	202.795		1000000482	79.1741	147.551	-1110.91		1000000310	121.565	274.18	-576.604		1000000091	288.72	119.854	-292.21
1000001039	215.146	217.57	203.569		1000000482	80.0927	147.457	-1110.97		1000000310	121.912	273.793	-576.964		1000000091	289.236	120.522	-292.21
1000001039	215.96	216.433	202.556		1000000482	80.0839	147.475	-1108.65		1000000310	121.735	273.793	-577.034		1000000091	289.479	120.154	-288.63
1000001039	214.377	215.368	205.669		1000000482	79.4307	146.727	-1109.64		1000000310	122.378	273.335	-576.933		1000000091	290.758	119.361	-287.674
1000001039	216.164	214.017	203.161		1000000482	79.0652	146.882	-1109.28		1000000310	121.588	273.601	-577.03		1000000091	291.414	119.74	-287.657
1000001039	214.986	215.587	202.826		1000000482	79.0582	146.998	-1108.91		1000000310	121.817	273.707	-577.047		1000000091	290.884	120.063	-288.365
1000001039	215.161	217.4	204.113		1000000482	78.8508	146.651	-1108.82		1000000310	122.53	273.449	-577.418		1000000091	290.573	119.571	-288.15
1000001039	215.742	215.08	202.114		1000000482	78.7176	147.154	-1109.79		1000000310	122.514	273.697	-577.282		1000000091	290.737	120.351	-287.746
1000001039	214.205	215.789	202.102		1000000482	78.5478	146.827	-1111.48		1000000310	121.793	273.545	-576.911		1000000091	290.294	119.67	-286.968
1000001039	214.482	216.51	203.059		1000000482	78.7762	147.465	-1109.83		1000000310	122.528	273.083	-576.923		1000000091	290.342	119.178	-287.074
1000001039	215.566	214.864	202.489		1000000482	78.5269	146.823	-1110.15		1000000310	122.527	273.514	-576.77		1000000091	290.484	119.134	-287.123
1000001039	215.294	214.705	202.296		1000000482	78.8865	147.453	-1108.88		1000000310	121.709	273.19	-576.909		1000000091	290.425	119.786	-287.078
1000001039	214.969	215.714	201.544		1000000482	78.6376	148.059	-1109.83		1000000310	121.442	274.077	-576.288		1000000091	290.545	119.366	-286.93
1000001039	214.707	217.229	201.704		1000000482	78.227	147.325	-1110.45		1000000310	121.43	273.815	-576.168		1000000091	291.393	119.146	-286.877
1000001039	214.016	214.92	202.331		1000000482	78.1782	147.756	-1109.96		1000000310	121.77	273.166	-579.299		1000000091	290.911	119.027	-287.066
1000001039	214.42	215.961	201.963		1000000482	78.0814	147.511	-1105.82		1000000310	121.493	273.262	-582.21		1000000091	290.318	118.775	-286.966
1000001039	214.922	215.238	202.352		1000000482	77.9151	147.465	-1105.85		1000000310	122.223	273.324	-577.273		1000000091	290.343	118.752	-286.396
1000001039	214.288	215.738	201.284		1000000482	78.8528	148.121	-1110.95		1000000310	121.868	273.065	-577.383		1000000091	290.619	119.248	-286.835
1000001039	214.474	215.585	206.458		1000000482	78.9549	147.891	-1112		1000000310	121.384	273.867	-576.797		1000000091	291.033	119.155	-286.77
1000001039	214.437	216.103	202.579		1000000486	44.7678	155.578	-1095.08		1000000310	122.009	274.121	-577.11		1000000091	291.597	118.633	-288.221
1000001039	214.553	216.428	204.678		1000000486	44.8485	155.96	-1096.43		1000000310	122.303	273.187	-577.223		1000000091	290.704	118.91	-287.993
1000001039	214.677	216.654	205.232		1000000486	44.9123	155.129	-1099.16		1000000310	121.507	273.489	-577.377		1000000091	290.965	118.399	-287.784
1000001039	213.639	216.113	205.211		1000000486	45.2738	154.134	-1098.84		1000000310	122.541	272.866	-577.062		1000000091	290.397	118.278	-288.268
1000001039	214.554	214.812	203.977		1000000486	45.6509	153.492	-1100.41		1000000310	122.549	273.042	-577.225		1000000091	290.639	118.42	-287.829
1000001039	213.106	216.905	206.662		1000000486	46.7702	152.611	-1100.76		1000000310	122.2	272.816	-576.466		1000000091	290.779	118.691	-287.756
1000001039	213.211	216.066	204.737		1000000486	48.2137	151.429	-1103.51		1000000310	121.611	272.837	-576.779		1000000091	291.106	119.104	-288.205
1000001039	214.166	216.501	203.478		1000000486	46.193	150.857	-1101.67		1000000310	121.507	273.056	-576.51		1000000091	290.86	119.248	-292.21
1000001039	213.452	215.842	204.27		1000000486	47.8014	150.664	-1102.54		1000000310	121.238	273.09	-576.898		1000000091	290.933	119.155	-292.21
1000001039	213.033	217.654	203.68		1000000486	49.0123	150.77	-1104.04		1000000310	121.411	273.417	-576.862		1000000091	290.4	118.786	-292.21
1000001039	214.15	216.6	203.75		1000000486	49.9376	152.269	-1104.79		1000000310	121.838	272.768	-576.753		1000000091	291.043	118.459	-292.21
1000001039	213.952	216.235	203.714		1000000486	52.1222	153.547	-1104.84		1000000310	121.143	272.286	-576.131		1000000091	291.063	118.597	-292.21
1000001039	212.341	216.444	208.805		1000000486	52.0251	153.43	-1104.08		1000000310	121.514	272.049	-576.69		1000000091	291.376	118.437	-289.516
1000001039	213.819	215.707	203.704		1000000486	55.6366	155.334	-1103.62		1000000310	122.475	273.57	-576.878		1000000091	291.459	118.287	-289.452
1000001039	212.586	215.72	203.923		1000000486	55.3179	156.454	-1100.11		1000000310	121.339	273.936	-576.559		1000000091	292.269	118.66	-292.21
1000001039	212.687	215.701	203.333		1000000486	57.3325	156.919	-1100.11		1000000310	121.397	273.235	-574.278		1000000091	291.675	118.725	-292.21
1000001039	212.704	214.62	208.448		1000000486	60.164	157.495	-1099.4		1000000310	122.28	273.905	-575.15		1000000091	291.45	118.92	-292.21
1000001039	212.395	215.09	208.253		1000000486	60.5271	158.242	-1099.66		1000000310	121.109	273.739	-576.678		1000000091	291.491	118.714	-292.21
1000001043	252.347	169.521	218.789		1000000486	61.0785	158.264	-1099.22		1000000310	121.481	273.273	-576.643		1000000091	291.21	118.318	-292.21
1000001043	251.885	169.349	218.86		1000000486	62.0841	157.042	-1099.39		1000000310	121.656	272.778	-576.196		1000000091	291.89	117.885	-292.21
1000001043	251.158	168.16	220.805		1000000486	60.573	157.81	-1099.17		1000000310	121.356	272.426	-576.851		1000000091	292.473	117.937	-289.452
1000001043	252.484	168.624	218.483		1000000486	61.2896	157.9	-1099.14		1000000310	121.839	273.101	-576.763		1000000091	292.604	117.637	-288.606
1000001043	252.191	168.159	218.975		1000000486	62.0821	157.803	-1099.36		1000000310	122.614	272.787	-575.736		1000000091	292.535	117.348	-288.428
1000001043	250.736	167.829	221.275		1000000486	61.8101	158.054	-1101.72		1000000310	122.186	273.12	-575.008		1000000091	293.068	118.017	-292.21
1000001043	251.436	168.121	218.431		1000000486	61.5414	158.695	-1101.07		1000000310	121.902	273.25	-573.495		1000000091	291.902	118.367	-289.524
1000001043	250.988	168.091	219.814		1000000486	61.0352	159.482	-1101.32		1000000310	122.004	273.645	-573.699		1000000091	292.213	117.651	-289.31
1000001043	252.41	168.113	219.505		1000000486	60.6255	159.752	-1102.59		1000000310	121.43	273.112	-575.355		1000000091	292.019	118.202	-292.21
1000001043	251.623	168.13	217.704		1000000486	60.2822	160.002	-1104.3		1000000310	120.735	272.956	-576.707		1000000091	292.262	118.32	-292.21
1000001043	251.546	168.583	218.218		1000000486	63.3957	155.618	-1100.58		1000000310	121.905	273.023	-576.529		1000000091	291.502	117.83	-292.21
1000001043	250.81	168.196	221.201		1000000486	61.0635	159.084	-1104.76		1000000310	121.688	272.61	-576.59		1000000091	292.039	117.758	-292.21
1000001043	251.525	168.37	218.146		1000000486	60.165	159.899	-1106.02		1000000310	121.998	271.925	-575.379		1000000091	291.742	118.554	-292.21
1000001043	251.417	168.399	217.914		1000000486	59.5137	159.574	-1105.39		1000000310	122.707	272.21	-575.536		1000000091	292.151	117.561	-288.716
1000001043	251.174	168.278	216.767		1000000486	58.0404	157.692	-1105.59		1000000310	123.136	271.227	-576.293		1000000091	293.335	117.262	-292.21
1000001043	251.446	169.061	217.364		1000000486	57.8861	158.343	-1106.29		1000000310	122.526	273.198	-573.609		1000000091	291.871	116.72	-288.4
1000001043	251.24	168.91	218.014		1000000486	57.699	157.89	-1106.65		1000000310	122.284	272.694	-573.397		1000000091	291.207	118.284	-292.21
1000001043	251.386	169.08	217.833		1000000486	55.7371	156.752	-1103.2		1000000310	122.299	273.307	-573.768		1000000091	291.743	118.398	-292.21
1000001043	251.035	168.971	218.039		1000000486	53.6423	156.191	-1101.38		1000000310	122.142	272.447	-573.396		1000000091	291.618	118.08	-292.21
1000001043	251.536	169.007	217.789		1000000486	53.7224	156.359	-1101.48		1000000310	123.112	271.591	-576.472		1000000091	292.548	118.435	-292.21
1000001043	251.413	169.439	217.578		1000000486	51.6878	155.465	-1099.59		1000000310	122.879	273.526	-573.718		1000000091	292.01	118.246	-292.21
1000001043	251.455	169.616	217.139		1000000486	49.8583	154.639	-1097.89		1000000310	122.675	273.324	-572.683		1000000091	291.973	117.866	-292.21
1000001043	251.057	169.615	215.347		1000000486	48.6461	153.735	-1098.65		1000000310	122.157	273.498	-572.722		1000000091	291.035	117.267	-292.21
1000001043	251.648	169.737	217.229		1000000486	48.224	153.338	-1099.81		1000000310	122.093	273.379	-572.833		1000000091	291.69	117.078	-292.21
1000001043	251.32	169.615	217.575		1000000486	46.7446	154.424	-1092.29		1000000310	122.589	273.61	-572.676		1000000091	291.834	117.778	-292.21
1000001043	252.234	169.83	217.989		1000000486	46.7618	154.092	-1096.29		1000000310	121.714	272.452	-575.45		1000000091	292.372	117.219	-292.21
1000001043	250.117	169.665	221.85		1000000486	46.3794	155.565	-1096.39		1000000310	121.71	273.527	-575.869		1000000091	292.397	116.939	-292.21
1000001043	251.607	169.01	217.646		1000000486	46.1752	155.444	-1102.68		1000000310	122.354	273.505	-572.709		1000000091	291.915	117.206	-292.21
1000001043	251.966	169.527	217.312		1000000486	46.5028	154.874	-1101.92		1000000310	121.726	273.205	-574.447		1000000091	291.198	117.623	-292.21
1000001043	251.842	169.628	216.954		1000000486	45.0721	155.721	-1096.92		1000000310	122.208	274.008	-572.219		1000000091	291.66	118.009	-292.21
1000001043	252.653	169.623	217.383		1000000486	45.7884	154.522	-1099.42		1000000310	122.77	273.53	-571.875		1000000091	292.257	118.335	-292.21
1000001043	251.942	169.665	217.347		1000000486	46.3293	154.962	-1103.73		1000000310	121.796	274.007	-572.257		1000000091	292.387	117.834	-292.21
1000001043	252.09	169.816	217.456		1000000486	47.4678	155.027	-1102.4		1000000310	122.219	273.622	-572.054		1000000091	292.181	118.627	-292.21
1000001043	252.27	170.318	217.098		1000000486	47.6188	154.713	-1101.47		1000000310	122.034	273.06	-572.601		1000000091	291.762	119.263	-292.21
1000001043	252.047	170.485	216.022		1000000486	48.8032	152.509	-1104.81		1000000310	123.26	272.852	-575.434		1000000091	290.599	119.532	-292.21
1000001043	251.984	169.89	217.415		1000000486	50.2305	153.535	-1104.42		1000000310	121.319	273.515	-573.525		1000000091	290.422	119.647	-286.463
1000001043	251.638	170.093	217.332		1000000486	51.0693	153.615	-1106.35		1000000310	121.16	273.842	-571.872		1000000091	291.704	119.317	-286.351
1000001043	251.076	170.095	216.684		1000000486	52.0439	153.535	-1108.02		1000000310	121.627	274.104	-571.971		1000000091	291.46	119.71	-286.755
1000001043	252.807	169.797	214.118		1000000486	51.6124	152.613	-1105.66		1000000310	121.482	274.085	-571.627		1000000091	290.672	120.021	-286.61
1000001043	252.149	169.884	217.192		1000000486	51.5562	152.655	-1107.32		1000000310	121.988	273.566	-571.604		1000000091	291.109	119.756	-286.592
1000001043	253.861	168.461	213.691		1000000486	51.8939	152.647	-1106.27		1000000310	121.83	274.646	-571.993		1000000091	290.551	120.73	-286.571
1000001043	252.121	170.092	217.325		1000000486	51.6903	153.077	-1105.32		1000000310	121.229	273.934	-572.004		1000000091	290.892	121.265	-286.67
1000001043	252.028	170.326	217.252		1000000486	51.8319	152.587	-1106.68		1000000310	122.151	273.33	-571.913		1000000091	291.399	120.698	-286.646
1000001043	251.828	170.328	216.864		1000000486	53.3393	152.19	-1108.27		1000000310	121.304	273.857	-571.142		1000000091	291.736	119.792	-286.607
1000001043	251.874	170.018	217.017		1000000486	51.7513	152.32	-1106.11		1000000310	122.333	274.237	-571.425		1000000091	290.998	118.727	-286.396
1000001043	251.91	170.343	215.444		1000000486	52.3098	150.258	-1108.13		1000000310	122.404	274.227	-570.95		1000000091	291.216	117.643	-285.998
1000001043	252.172	169.873	216.181		1000000486	53.1639	149.718	-1109.79		1000000310	122.339	273.929	-571.216		1000000091	292.404	118.397	-286.285
1000001043	252.104	169.89	216.991		1000000486	52.6488	148.583	-1110.5		1000000310	122.109	273.42	-572.283		1000000091	292.865	118.511	-286.408
1000001043	252.755	170.163	214.325		1000000486	52.7148	147.369	-1110.05		1000000310	122.127	273.417	-572.138		1000000091	293.963	119.97	-286.213
1000001043	252.887	170.289	213.329		1000000486	51.5303	145.202	-1109.31		1000000310	121.82	273.706	-571.52		1000000091	294.262	120.315	-286.489
1000001043	252.283	170.571	216.749		1000000486	51.2185	144.645	-1108.37		1000000310	122.085	274.051	-570.112		1000000091	293.663	120.378	-286.551
1000001043	252.595	170.717	213.776		1000000486	50.3914	144.06	-1110.55		1000000310	122.001	273.343	-571.174		1000000091	294.086	120.343	-286.631
1000001043	252.366	170.67	213.271		1000000486	49.765	142.543	-1110.58		1000000310	122.235	273.95	-571.911		1000000091	295.854	120.117	-286.528
1000001043	252.707	171.253	212.873		1000000486	49.0425	142.309	-1109.67		1000000310	122.016	274.172	-571.703		1000000091	296.16	119.982	-286.27
1000001043	252.756	170.69	213.416		1000000486	48.4225	142.737	-1105.93		1000000310	123.236	273.555	-568.778		1000000091	296.03	120.34	-286.526
1000001043	252.785	170.695	213.485		1000000486	48.176	141.109	-1104.38		1000000310	121.66	273.362	-572.613		1000000091	297.46	120.72	-286.722
1000001043	253.079	170.828	213.462		1000000486	48.1463	140.657	-1109.32		1000000310	122.921	273.363	-572.182		1000000091	298.673	120.776	-286.132
1000001043	252.867	171.228	214.437		1000000486	48.1762	140.721	-1109.69		1000000310	123.105	273.225	-571.489		1000000091	298.967	120.322	-286.474
1000001043	252.797	171.333	214.681		1000000486	47.763	139.706	-1108.55		1000000310	122.067	273.427	-571.647		1000000091	299.221	119.687	-286.471
1000001043	253.147	170.559	213.653		1000000486	46.8935	139.904	-1108.73		1000000310	122.523	273.753	-570.919		1000000091	300.136	121.007	-286.452
1000001043	253.725	170.43	212.894		1000000537	121.9	140.525	-1120.07		1000000310	122.374	272.708	-571.146		1000000091	299.272	119.441	-286.274
1000001043	252.882	171.21	211.248		1000000537	121.687	142.238	-1120		1000000310	121.91	273.608	-571.208		1000000091	298.154	119.512	-286.517
1000001043	252.019	171.087	212.779		1000000537	121.592	142.013	-1120.48		1000000310	121.966	273.419	-571.611		1000000091	298.22	119.258	-285.824
1000001043	252.413	171.218	213.05		1000000537	121.143	140.784	-1121.48		1000000310	121.93	273.754	-571.643		1000000091	299.593	119.884	-286.285
1000001043	252.844	171.254	212.706		1000000537	121.139	140.666	-1120.86		1000000310	121.604	273.101	-571.569		1000000091	300.064	119.969	-285.961
1000001043	252.556	171.424	212.374		1000000537	122.097	140.962	-1118.54		1000000310	121.789	273.947	-571.726		1000000091	302.747	121.161	-285.971
1000001043	252.936	171.147	212.78		1000000537	122.665	139.801	-1120.51		1000000310	121.876	274.362	-571.103		1000000091	300.865	121.328	-286.542
1000001043	252.408	171.105	212.762		1000000537	121.79	140.74	-1119.86		1000000310	121.713	273.362	-572.313		1000000091	300.58	119.348	-286.426
1000001043	252.693	171.002	212.297		1000000537	121.668	140.608	-1120.22		1000000310	121.448	274.367	-571.775		1000000091	300.234	121.044	-286.847
1000001043	252.67	170.825	213.614		1000000537	121.851	140.607	-1125.22		1000000310	122.024	274.1	-571.426		1000000091	298.229	120.45	-286.512
1000001043	253.377	171.521	209.608		1000000537	121.235	141.28	-1125.22		1000000310	122.844	272.864	-571.382		1000000091	299.591	120.703	-286.596
1000001043	252.329	171.556	212.661		1000000537	122.034	140.566	-1125.22		1000000310	122.047	273.7	-571.545		1000000091	300.303	119.674	-286.206
1000001043	252.407	171.258	212.651		1000000537	121.212	139.568	-1121.44		1000000310	122.656	273.29	-568.904		1000000091	300.717	120.445	-286.061
1000001043	252.567	172.437	212.581		1000000537	122.286	140.54	-1120.74		1000000310	123.014	273.248	-571.328		1000000091	299.252	119.377	-286.166
1000001043	252.889	172.076	211.902		1000000537	121.603	140.018	-1121.72		1000000310	122.747	273.041	-571.607		1000000091	299.462	119.654	-286.292
1000001043	252.255	171.835	212.762		1000000537	122.721	140.205	-1125.22		1000000310	122.928	273.09	-571.463		1000000091	300.715	121.352	-286.606
1000001043	252.291	172.212	212.795		1000000537	122.492	140.207	-1125.22		1000000310	122.603	274.188	-571.193		1000000091	301.299	120.638	-286.341
1000001043	252.316	172.426	212.789		1000000537	122.566	141.105	-1125.22		1000000310	122.116	273.836	-573.135		1000000091	300.008	119.935	-286.333
1000001043	252.219	171.896	211.758		1000000537	121.921	141.604	-1125.22		1000000310	123.369	272.559	-574.88		1000000091	299.526	120.774	-286.467
1000001043	252.162	171.756	211.708		1000000537	122.263	139.463	-1125.22		1000000310	122.85	274.142	-571.479		1000000091	299.239	118.653	-286.39
1000001043	253.016	171.542	212.12		1000000537	122.23	140.244	-1125.22		1000000310	122.702	273.087	-575.446		1000000091	297.616	117.943	-286.337
1000001043	253.808	170.328	213.994		1000000537	121.713	140.561	-1125.22		1000000310	122.526	273.661	-573.346		1000000091	299.015	120.292	-286.511
1000001043	253.993	170.121	212.986		1000000537	122.243	139.948	-1125.22		1000000310	122.221	273.69	-573.826		1000000091	299.222	120.577	-286.714
1000001043	253.994	170.762	210.674		1000000537	122.016	140.243	-1125.22		1000000310	122.768	274.056	-572.131		1000000091	300.44	120.191	-286.522
1000001043	254.703	170.227	212.423		1000000537	122.244	140.333	-1125.22		1000000310	122.755	273.713	-571.942		1000000091	300.741	120.087	-286.279
1000001043	254.054	167.311	212.249		1000000537	122.138	140.497	-1125.22		1000000310	122.595	273.769	-572.087		1000000091	300.149	120.663	-286.623
1000001043	254.684	168.779	209.478		1000000537	121.595	140.833	-1125.22		1000000310	122.139	274.337	-575.217		1000000091	299.593	120.756	-286.548
1000001043	254.314	169.039	212.372		1000000537	121.834	140	-1125.22		1000000310	122.103	274.334	-571.914		1000000091	299.429	119.77	-286.311
1000001043	254.238	170.511	212.297		1000000537	121.425	141.395	-1125.22		1000000310	122.112	274.886	-572.318		1000000091	297.773	119.518	-286.398
1000001043	254.396	170.41	212.993		1000000537	121.092	140.705	-1125.22		1000000310	122.819	274.248	-572.82		1000000091	299.019	119.827	-286.431
1000001043	253.393	168.822	213.857		1000000537	121.776	140.14	-1125.22		1000000310	121.687	274.854	-572.086		1000000091	296.37	118.819	-286.418
1000001043	254.276	168.953	213.118		1000000537	121.613	140.911	-1125.22		1000000310	121.687	273.804	-571.917		1000000091	296.944	118.782	-286.436
1000001043	254.637	168.141	209.689		1000000537	121.823	140.811	-1125.22		1000000310	122.512	274.66	-571.909		1000000091	297.788	119.392	-286.593
1000001043	255.118	168.645	212.77		1000000537	121.841	141.287	-1125.22		1000000310	122.187	274.219	-572.252		1000000091	297.586	119.721	-286.504
1000001043	254.781	167.07	207.895		1000000537	121.504	142.555	-1125.22		1000000310	121.532	273.993	-571.736		1000000091	296.595	119.076	-286.523
1000001043	254.425	168.587	211.404		1000000537	122.515	140.987	-1125.22		1000000310	122.109	273.659	-571.029		1000000091	297.608	119.192	-286.523
1000001043	254.567	168.113	210.827		1000000537	121.728	140.146	-1125.22		1000000310	121.976	274.395	-572.032		1000000091	297.573	119.701	-286.528
1000001043	254.714	169.014	211.981		1000000537	121.914	140.395	-1125.22		1000000310	122.298	273.87	-572.559		1000000105	310.553	123.109	-282.571
1000001043	253.685	166.883	211.326		1000000537	121.805	140.288	-1125.22		1000000310	121.788	273.962	-572.32		1000000105	309.542	122.751	-283.509
1000001043	253.226	166.97	211.989		1000000537	121.188	141.056	-1125.22		1000000310	121.39	273.54	-574.354		1000000105	308.714	122.908	-285.71
1000001043	253.703	167.264	211.244		1000000537	122.047	141.532	-1125.22		1000000310	122.308	274.488	-575.086		1000000105	309.724	122.116	-283.069
1000001043	252.952	167.575	211.39		1000000537	121.309	140.466	-1125.22		1000000310	121.531	274.169	-571.962		1000000105	309.298	122.457	-282.733
1000001043	253.743	167.584	211.856		1000000537	120.938	141.048	-1119.26		1000000310	121.227	274.493	-571.96		1000000105	308.914	122.794	-282.756
1000001043	252.802	166.716	212.417		1000000537	121.512	141.838	-1125.22		1000000310	121.571	274.212	-572.005		1000000105	309.255	123.139	-283.629
1000001043	252.946	166.521	210.871		1000000537	122.263	141.585	-1119.09		1000000310	121.595	273.966	-571.829		1000000105	308.736	122.589	-285.504
1000001043	253.016	166.97	211.51		1000000537	121.9	141.314	-1125.22		1000000310	121.954	272.811	-574.309		1000000105	308.742	122.735	-286.796
1000001043	253.341	166.813	211.915		1000000537	120.805	141.427	-1125.22		1000000310	120.937	273.948	-571.753		1000000105	308.29	122.616	-287.151
1000001043	252.869	166.553	212.269		1000000537	120.567	141.727	-1118.76		1000000310	121.09	273.128	-572.108		1000000105	307.679	122.386	-287.245
1000001043	253.238	166.666	211.74		1000000537	119.078	140.931	-1117.35		1000000310	121.504	274.048	-571.901		1000000105	307.62	122.332	-287.205
1000001043	252.459	166.485	211.807		1000000537	120.479	141.412	-1118.83		1000000310	121.471	273.89	-570.835		1000000105	307.576	122.859	-287.277
1000001043	253.72	166.466	210.49		1000000549	99.5977	105.115	-1109.92		1000000310	122.067	274.467	-570.787		1000000105	307.115	122.649	-287.385
1000001043	252.888	166.682	208.916		1000000549	100.016	105.475	-1110.01		1000000310	121.65	273.892	-571.962		1000000105	306.887	121.676	-287.388
1000001043	252.006	166.286	211.501		1000000549	99.5257	104.88	-1110.45		1000000310	122.282	274.096	-571.963		1000000105	306.831	122.623	-286.771
1000001043	252.535	166.18	213.082		1000000549	99.5277	104.827	-1113.24		1000000310	121.675	272.978	-572.748		1000000105	306.811	123.088	-287.614
1000001043	253.21	166.038	208.305		1000000549	98.9298	102.817	-1110.41		1000000310	121.427	273.07	-572.467		1000000105	307.064	123.113	-286.977
1000001043	253.398	166.294	209.257		1000000549	99.9338	103.987	-1109.62		1000000310	122.403	273.586	-571.085		1000000105	307.344	123.114	-287.365
1000001043	253.234	166.394	208.744		1000000549	99.9896	103.457	-1110.59		1000000310	122.085	273.791	-570.546		1000000105	307.214	122.733	-287.705
1000001043	253.111	166.237	208.194		1000000549	99.5492	104.463	-1110.58		1000000310	121.389	274.143	-571.884		1000000105	307.211	123.087	-287.285
1000001043	253.287	166.063	209.414		1000000549	99.2633	104.248	-1110.09		1000000310	121.422	273.976	-572.228		1000000105	308.103	123.955	-287.182
1000001043	253.417	165.928	208.054		1000000549	99.7847	104.264	-1111.59		1000000310	121.927	274.14	-573.089		1000000105	310.061	125.46	-286.98
1000001043	252.761	166.186	210.628		1000000549	99.2318	102.92	-1110.07		1000000310	122.158	273.093	-572.169		1000000105	311.372	126.426	-286.253
1000001043	252.996	166.116	208.21		1000000549	99.0197	103.388	-1113.43		1000000310	122.07	272.64	-572.221		1000000105	312.097	128.91	-282.332
1000001043	252.983	166.239	212.328		1000000549	100.256	103.505	-1111.18		1000000310	121.86	272.43	-572.899		1000000105	312.057	128.747	-282.909
1000001043	252.765	166.095	212.837		1000000549	99.685	104.132	-1109.78		1000000310	121.681	273.208	-573.702		1000000105	312.812	128.161	-282.054
1000001043	252.888	166.706	212.589		1000000549	99.8864	104.659	-1110.08		1000000310	121.564	273.483	-572.359		1000000105	312.308	128.537	-282.014
1000001043	252.988	166.067	208.219		1000000549	99.7375	103.834	-1110.45		1000000310	120.866	274.185	-576.243		1000000105	312.461	126.177	-282.448
1000001043	252.936	166.33	212.801		1000000549	100.096	104.524	-1110.76		1000000310	121.931	272.396	-571.858		1000000105	313.534	126.307	-282.914
1000001043	252.616	166.431	207.672		1000000549	99.4753	104.121	-1113.96		1000000310	121.904	271.694	-575.151		1000000105	312.795	126.992	-282.192
1000001043	252.371	166.317	212.726		1000000549	99.9363	105.139	-1110.56		1000000310	121.789	273.203	-573.863		1000000105	311.714	127.87	-281.945
1000001043	252.438	166.952	208.057		1000000549	99.0085	103.876	-1111.52		1000000310	121.266	272.791	-572.005		1000000105	310.989	129.523	-280.364
1000001043	253.027	167.012	213.157		1000000549	98.3863	103.442	-1114.07		1000000310	120.945	272.828	-572.565		1000000105	311.093	131.155	-278.327
1000001043	252.848	167.165	212.781		1000000549	100.311	103.959	-1114.3		1000000310	121.551	272.328	-572.463		1000000105	310.478	131.961	-278.493
1000001043	252.922	167.375	212.255		1000000549	99.888	104.16	-1114.42		1000000310	121.41	273.021	-571.929		1000000105	311.683	131.236	-281.831
1000001043	252.479	166.463	212.513		1000000549	100.363	104.666	-1114.51		1000000310	121.454	272.714	-573.914		1000000105	311.208	132.075	-281.032
1000001043	253.125	168.433	208.63		1000000549	100.284	104.698	-1114.83		1000000310	122.683	272.01	-576.112		1000000105	311.355	130.997	-281.496
1000001043	252.704	167.741	212.457		1000000549	100.33	104.757	-1114.57		1000000310	121.174	272.227	-569.075		1000000105	311.232	131.469	-281.452
1000001043	252.437	167.857	212.539		1000000549	99.6217	103.298	-1114.83		1000000310	121.35	272.328	-574.257		1000000105	311.28	131.517	-282.221
1000001043	253.635	166.872	209.396		1000000549	100.153	104.839	-1115.04		1000000310	120.319	271.958	-572.289		1000000105	310.648	132.194	-282.155
1000001043	252.18	166.558	211.812		1000000549	99.5292	103.28	-1114.59		1000000310	121.331	272.855	-571.682		1000000105	310.257	132.699	-282.099
1000001109	311.972	191.527	212.34		1000000549	100.23	103.778	-1114.77		1000000310	121.68	271.557	-572.401		1000000105	310.471	131.983	-282.95
1000001109	311.459	191.376	212.663		1000000549	98.695	104.342	-1114.05		1000000310	121.275	271.811	-572.34		1000000105	310.822	131.798	-282.751
1000001109	311.635	191.292	214.369		1000000549	100.684	104.006	-1113.45		1000000310	121.689	272.075	-573.493		1000000105	311.681	128.168	-286.369
1000001109	312.155	191.091	213.291		1000000549	100.873	104.545	-1112.25		1000000310	121.94	271.891	-574.47		1000000105	310.959	131.342	-282.464
1000001109	311.809	191.737	211.817		1000000549	101.097	104.128	-1114.66		1000000310	121.215	272.034	-574.82		1000000105	312.568	128.165	-286.273
1000001109	312.025	191.024	213.908		1000000549	100.851	105.226	-1115.97		1000000310	121.111	271.887	-572.343		1000000105	310.594	132.369	-282.119
1000001109	311.832	191.204	211.976		1000000549	101.322	104.662	-1114.86		1000000404	262.657	183.022	-575.557		1000000105	310.605	131.668	-282.555
1000001109	311.436	191.398	212.206		1000000549	101.262	104.37	-1114.96		1000000404	262.953	183.442	-576.696		1000000105	310.133	131.916	-283.284
1000001109	312.066	191.163	213.259		1000000549	100.824	103.738	-1114.5		1000000404	262.256	183.844	-576.868		1000000105	311.793	129.021	-285.958
1000001109	311.984	191.763	211.327		1000000549	100.364	104.77	-1114.03		1000000404	260.992	183.777	-577.379		1000000105	312.82	126.313	-287.995
1000001109	312.445	191.523	213.858		1000000549	100.464	105.405	-1114.67		1000000404	259.579	183.793	-577.031		1000000105	312.344	126.67	-287.46
1000001109	311.733	191.07	212.09		1000000549	101.04	104.7	-1115.68		1000000404	258.872	183.849	-579.507		1000000105	312.144	126.158	-287.648
1000001109	311.952	191.838	212.852		1000000549	100.809	104.194	-1114.83		1000000404	259.691	184.484	-582.21		1000000166	0	184.745	-281.692
1000001109	311.738	191.669	212.383		1000000549	99.9288	104.114	-1110.64		1000000404	259.273	184.528	-582.21		1000000166	0	182.92	-282.205
1000001109	311.787	191.457	208.35		1000000549	100.542	103.986	-1114.3		1000000404	259.647	185.246	-582.21		1000000166	0	182.152	-283.737
1000001109	311.915	191.446	212.085		1000000549	101.047	103.956	-1110.4		1000000404	260.352	185.138	-582.21		1000000166	0	180.534	-284.856
1000001109	311.779	191.141	212.427		1000000549	101.075	105.192	-1116.31		1000000404	259.339	185.149	-582.21		1000000166	0	179.888	-286.004
1000001109	311.275	191.951	211.725		1000000549	101.372	104.337	-1115.81		1000000404	258.56	184.569	-582.21		1000000166	0.349127	178.825	-287.156
1000001109	311.555	191.8	212.314		1000000549	100.791	104.75	-1113.76		1000000404	257.852	184.057	-582.21		1000000166	2.78273	174.857	-292.21
1000001109	312.078	191.338	211.777		1000000549	101.618	104.291	-1111.28		1000000404	258.93	184.659	-582.21		1000000166	3.50005	172.014	-292.21
1000001109	311.454	191.795	212.284		1000000549	100.184	104.641	-1113.87		1000000404	259.481	185.621	-582.21		1000000166	3.85162	170.098	-292.21
1000001109	312.331	191.517	210.828		1000000549	100.771	104.61	-1114.05		1000000404	259.087	185.11	-582.21		1000000166	4.72313	168.31	-292.21
1000001109	311.356	190.886	210.562		1000000549	100.854	105.7	-1112.58		1000000404	258.839	185.219	-582.21		1000000166	5.90817	167.37	-292.21
1000001109	311.772	191.394	212.366		1000000549	100.392	104.257	-1111.8		1000000404	258.573	184.954	-582.21		1000000166	6.61084	166.642	-292.21
1000001109	311.274	191.274	211.739		1000000549	101.109	104.583	-1113.42		1000000404	259.03	185.809	-582.21		1000000166	6.75741	166.327	-292.21
1000001109	311.602	191.193	213.145		1000000549	101.432	104.31	-1113.65		1000000404	258.316	185.777	-582.21		1000000166	7.98751	167.073	-292.21
1000001109	311.352	191.303	211.658		1000000549	101.558	104.32	-1113.78		1000000404	259.056	185.544	-582.21		1000000166	8.43785	167.009	-292.21
1000001109	311.789	191.521	209.21		1000000549	100.632	104.707	-1113.46		1000000404	258.932	185.736	-582.21		1000000166	8.38374	167.484	-292.21
1000001109	311.341	192.039	209.38		1000000549	101.48	105.497	-1114.5		1000000404	258.582	185.797	-582.21		1000000166	8.36942	167.137	-292.21
1000001109	311.551	192.085	211.159		1000000549	101.429	105.568	-1113.37		1000000404	259.363	186.335	-582.21		1000000166	8.81775	167.92	-292.21
1000001109	311.988	191.325	212.307		1000000549	102.044	104.631	-1114.24		1000000404	258.927	186.758	-582.21		1000000166	9.11828	167.561	-292.21
1000001109	312.208	191.283	212.285		1000000549	101.36	104.096	-1113.9		1000000404	258.392	186.884	-582.21		1000000166	9.69001	167.905	-292.21
1000001109	311.648	192.004	211.07		1000000549	101.376	105.473	-1112.16		1000000404	257.822	186.412	-582.21		1000000166	9.79034	168.675	-292.21
1000001109	311.84	191.471	212.369		1000000549	101.222	104.824	-1112.47		1000000404	257.621	185.964	-582.21		1000000166	9.57268	168.589	-292.21
1000001109	311.708	191.594	210.606		1000000549	100.181	103.807	-1111.8		1000000404	258.678	185.881	-582.21		1000000166	10.0519	168.361	-292.21
1000001109	311.922	192.14	212.195		1000000549	101.449	104.784	-1114.57		1000000404	258.976	186.535	-582.21		1000000166	10.4018	168.582	-292.21
1000001109	311.641	191.612	212.574		1000000549	100.757	104.734	-1115.33		1000000404	258.637	187.363	-582.21		1000000166	10.6742	169.007	-292.21
1000001109	311.342	192.069	212.293		1000000549	101.389	105.712	-1114.95		1000000404	258.026	187.985	-582.21		1000000166	10.6554	169.021	-292.21
1000001109	311.938	191.89	210.717		1000000549	100.806	104.666	-1115.23		1000000404	258.865	187.981	-582.21		1000000166	10.9867	168.495	-292.21
1000001109	311.696	192.089	212.857		1000000549	100.896	104.991	-1114.35		1000000404	258.801	187.395	-582.21		1000000166	10.7577	169.266	-292.21
1000001109	312.801	190.765	212.566		1000000549	100.789	105.378	-1114.51		1000000404	258.185	187.215	-582.21		1000000166	11.1802	168.665	-292.21
1000001109	311.912	191.928	212.3		1000000549	100.787	105.247	-1115.15		1000000404	258.272	185.572	-582.21		1000000166	12.8696	169.519	-288.241
1000001109	312.19	192.071	212.454		1000000549	99.3179	105.236	-1115.59		1000000404	258.329	185.806	-582.21		1000000166	13.0306	169.604	-288.861
1000001109	312.577	193.43	211.304		1000000549	99.9458	104.804	-1111.26		1000000404	258.756	187.588	-582.21		1000000166	12.0255	170.274	-292.21
1000001109	312.092	192.619	211.624		1000000549	100.25	105.39	-1113.16		1000000404	259.84	189.925	-582.21		1000000166	12.5125	170.017	-288.509
1000001109	312.127	192.646	212.175		1000000549	99.3711	104.659	-1115.12		1000000404	260.511	192.454	-582.21		1000000166	12.1835	170.996	-287.759
1000001109	311.661	192.305	210.901		1000000549	99.1498	105.475	-1115.3		1000000404	260.102	190.904	-582.21		1000000166	12.4662	170.788	-289.246
1000001109	311.868	192.419	212.528		1000000549	99.8889	104.759	-1116.12		1000000404	260.323	191.158	-582.21		1000000166	13.322	171.35	-292.21
1000001109	313.265	192.734	209.193		1000000549	100.606	104.422	-1114.98		1000000404	260.412	190.24	-582.21		1000000166	13.1891	171.281	-292.21
1000001109	312.07	192.673	208.008		1000000549	100.833	104.185	-1111.23		1000000404	259.258	187.461	-582.21		1000000166	12.9074	171.098	-292.21
1000001109	311.908	193.077	211.837		1000000549	101.272	104.185	-1111.43		1000000404	258.514	187.473	-582.21		1000000166	13.0643	171.546	-292.21
1000001109	312.028	192.113	211.944		1000000549	101.666	105.634	-1113.89		1000000404	259.031	187.432	-582.21		1000000166	13.1389	171.659	-292.21
1000001109	312.288	192.692	207.966		1000000549	100.891	105.743	-1113.2		1000000404	260.658	189.654	-582.21		1000000166	13.1067	171.886	-292.21
1000001109	312.986	193.406	208.784		1000000549	102.248	104.602	-1114.16		1000000404	259.903	190.056	-582.21		1000000166	13.2851	172.791	-292.21
1000001109	313.462	193.084	209.216		1000000549	101.233	104.239	-1114.08		1000000404	260.935	191.286	-582.21		1000000166	12.6663	173.186	-292.21
1000001109	312.588	192.652	211.385		1000000549	102.013	105.189	-1114.07		1000000404	260.969	190.61	-582.21		1000000166	11.6503	172.981	-292.21
1000001109	311.926	193.47	212.17		1000000549	101.298	105.144	-1113.17		1000000404	260.452	191.153	-582.21		1000000166	11.5998	173.378	-292.21
1000001109	312.942	193.12	209.767		1000000549	102.164	103.856	-1113.89		1000000404	260.809	190.382	-582.21		1000000166	12.9015	173.506	-292.21
1000001109	311.738	193.295	210.961		1000000549	102.836	104.618	-1113.18		1000000404	260.539	190.868	-582.21		1000000166	12.3568	173.376	-292.21
1000001109	311.527	193.464	210.116		1000000549	102.95	103.4	-1113.42		1000000404	260.098	191.27	-582.21		1000000166	12.006	173.449	-292.21
1000001109	312.156	193.375	208.349		1000000549	102.814	103.603	-1113.22		1000000404	260.229	191.87	-582.21		1000000166	12.1002	172.349	-292.21
1000001109	312.045	194.137	208.607		1000000549	103.151	103.833	-1113.44		1000000404	259.896	192.916	-582.21		1000000166	12.2398	171.874	-292.21
1000001109	312.213	193.539	208.606		1000000549	103.599	104.222	-1113.88		1000000404	260.488	193.523	-582.21		1000000166	12.5166	172.831	-292.21
1000001109	312.254	194.967	207.086		1000000549	102.56	103.055	-1111.91		1000000404	260.344	193.513	-582.21		1000000166	12.9099	171.863	-292.21
1000001109	312.582	193.803	208.239		1000000549	102.594	104.298	-1111.77		1000000404	260.084	193.318	-582.21		1000000166	13.0597	170.838	-292.21
1000001109	311.698	194.208	208.242		1000000549	101.972	104.547	-1111.73		1000000404	260.557	192.258	-582.21		1000000166	12.8474	171.287	-292.21
1000001109	312.847	193.515	208.386		1000000549	103.008	103.325	-1114.03		1000000404	260.323	192.987	-582.21		1000000166	12.7747	171.242	-292.21
1000001109	311.719	193.758	208.407		1000000549	103.416	103.38	-1114.07		1000000404	260.071	193.391	-582.21		1000000166	12.7771	171.289	-292.21
1000001109	312.659	194.154	207.928		1000000549	102.934	104.688	-1112.13		1000000404	260.17	194.427	-582.21		1000000166	12.7851	170.995	-292.21
1000001109	311.328	194.625	210.254		1000000549	103.519	104.091	-1114.11		1000000404	260.018	194.474	-582.21		1000000166	12.9018	170.626	-292.21
1000001109	311.451	194.803	207.058		1000000549	107.702	105.806	-1114.42		1000000404	260.259	194.816	-582.21		1000000166	12.8749	171.356	-292.21
1000001109	311.266	195.054	206.742		1000000549	106.11	105.124	-1114.41		1000000404	260.942	194.906	-582.21		1000000166	12.8091	171.206	-292.21
1000001109	312.09	194.359	207.638		1000000549	106.126	105.55	-1114.59		1000000404	261.147	195.966	-577.534		1000000166	13.8561	170.688	-292.21
1000001109	310.978	195.8	207.363		1000000549	105.587	105.522	-1114.58		1000000404	261.273	196.393	-578.356		1000000166	13.0739	170.7	-292.21
1000001109	311.504	195.389	207.381		1000000549	104.162	105.451	-1114.39		1000000404	260.95	196.84	-582.21		1000000166	13.2329	171.044	-292.21
1000001109	310.285	195.633	205.925		1000000549	103.352	105.371	-1114.28		1000000404	261.735	197.263	-577.739		1000000166	12.63	171.129	-292.21
1000001109	311.469	195.577	207.983		1000000549	102.785	104.128	-1113.84		1000000404	262.097	197.277	-577.384		1000000166	12.743	170.889	-292.21
1000001109	311.487	195.531	207.123		1000000549	106.262	106.201	-1114.32		1000000404	262.228	197.655	-577.689		1000000166	12.5295	171.481	-292.21
1000001109	311.417	195.984	206.962		1000000549	108.239	105.755	-1114.6		1000000404	262.396	198.386	-578.042		1000000166	13.176	171.114	-292.21
1000001109	311.464	195.47	205.349		1000000549	103.695	105.383	-1114.03		1000000404	262.095	197.991	-576.868		1000000166	12.8706	171.001	-292.21
1000001109	310.555	195.71	207.673		1000000549	103.469	105.444	-1114.27		1000000404	262.074	197.713	-577.194		1000000166	12.5478	169.907	-292.21
1000001109	311.512	194.669	209.94		1000000549	102.512	104.593	-1109.4		1000000404	261.771	197.052	-578.795		1000000166	13.0992	170.256	-292.21
1000001109	311.145	195.342	205.608		1000000549	103.228	104.775	-1108.69		1000000404	261.784	197.778	-577.944		1000000166	12.6345	170.56	-292.21
1000001109	311.03	195.435	206.592		1000000549	103.08	103.744	-1109.34		1000000404	262.037	197.035	-576.791		1000000166	12.6933	170.308	-292.21
1000001109	311.415	195.47	207.584		1000000549	103.917	106.31	-1114.05		1000000404	262.293	197.1	-576.5		1000000166	13.2025	170.611	-292.21
1000001109	311.231	195.753	209.174		1000000549	103.379	106.067	-1114.37		1000000404	262.582	198.267	-576.532		1000000166	12.7273	170.432	-292.21
1000001109	310.767	195.871	206.921		1000000549	103.474	104.983	-1113.9		1000000404	261.657	197.689	-576.63		1000000166	12.5929	170.345	-292.21
1000001109	311.01	195.566	208.658		1000000549	103.891	104.351	-1109.8		1000000404	261.983	197.81	-576.583		1000000166	12.5518	170.498	-292.21
1000001109	311.513	195.075	206.475		1000000549	104.085	104.416	-1109.45		1000000404	261.151	197.846	-577.716		1000000166	12.6335	169.321	-292.21
1000001109	311.07	195.584	206.216		1000000549	102.509	106.196	-1109.41		1000000404	262.216	197.437	-577.71		1000000166	12.1571	169.526	-292.21
1000001109	311.347	195.507	207.412		1000000549	102.271	106.984	-1109.09		1000000404	261.843	197.084	-577.307		1000000166	12.3625	169.634	-292.21
1000001109	311.527	195.301	206.698		1000000549	102.637	105.547	-1109.19		1000000404	262.105	197.384	-577.085		1000000166	12.0201	169.513	-292.21
1000001109	311.375	195.346	207.327		1000000549	102.193	104.872	-1109.39		1000000404	261.979	197.885	-576.026		1000000166	12.3732	170.059	-292.21
1000001109	311.761	195.844	208.848		1000000549	103.758	106.061	-1109.28		1000000404	262.903	197.944	-576.66		1000000166	12.5139	170.061	-292.21
1000001109	312.22	195.346	205.475		1000000567	165.563	154.793	-1099.58		1000000404	262.742	197.928	-575.804		1000000166	13.0344	170.331	-292.21
1000001109	312.092	195.382	205.205		1000000567	164.961	154.843	-1100.55		1000000404	262.551	197.663	-576.18		1000000166	12.7858	170.267	-292.21
1000001109	312.195	195.119	207.812		1000000567	164.084	154.238	-1099.79		1000000404	262.841	197.292	-576.007		1000000166	12.6148	170.123	-292.21
1000001109	312.539	195.822	209.046		1000000567	165.259	154.173	-1100.59		1000000404	262.436	197.026	-575.931		1000000166	12.622	170.018	-292.21
1000001109	311.998	195.583	207.955		1000000567	165.223	153.65	-1099.04		1000000404	263.698	197.617	-574.609		1000000166	13.0161	170.394	-292.21
1000001109	311.943	194.922	207.178		1000000567	165.72	153.123	-1099.27		1000000404	264.028	197.455	-572.146		1000000166	12.1781	170.146	-292.21
1000001109	312.204	195.691	206.134		1000000567	162.821	153.166	-1099.84		1000000404	263.551	197.984	-571.101		1000000166	12.5622	170.761	-286.83
1000001109	311.649	195.087	207.024		1000000567	163.741	153.865	-1099.99		1000000404	263.611	197.834	-568.429		1000000166	13.1838	170.238	-286.675
1000001109	311.966	195.788	208.337		1000000567	165.06	153.469	-1099.93		1000000404	263.251	198.707	-567.485		1000000166	13.4139	170.903	-286.225
1000001109	311.438	195.792	210.226		1000000567	165.116	153.661	-1099.76		1000000404	263.435	198.352	-569.211		1000000166	13.1596	171.182	-286.889
1000001109	312.18	195.169	207.183		1000000567	164.841	153.773	-1101.58		1000000404	263.112	199.544	-567.803		1000000166	12.8987	171.156	-286.68
1000001109	311.067	195.658	208.146		1000000567	162.405	153.061	-1100.54		1000000404	263.217	199.003	-571.271		1000000166	13.2458	170.867	-286.798
1000001109	312.007	195.25	207.028		1000000567	162.661	152.563	-1100.04		1000000404	263.462	199.586	-567.751		1000000166	13.1844	170.81	-286.788
1000001109	311.156	195.416	207.173		1000000567	164.39	152.916	-1099.83		1000000404	263.614	199.493	-568.316		1000000166	13.2769	170.654	-286.467
1000001109	312.185	195.364	208.457		1000000567	164.696	154.34	-1099.15		1000000404	263.251	200.787	-571.056		1000000166	12.7811	171.513	-286.545
1000001109	311.138	195.163	207.833		1000000567	162.353	153.619	-1099.5		1000000404	263.651	200.805	-567.81		1000000166	12.31	174.368	-286.198
1000001109	311.915	194.589	201.528		1000000567	158.315	153.083	-1100.66		1000000404	263.895	200.253	-567.069		1000000166	12.1569	174.219	-286.576
1000001109	311.625	195.08	204.022		1000000567	162.017	154.534	-1100.7		1000000404	263.9	199.31	-566.897		1000000166	11.8645	175.412	-286.594
1000001109	311.253	194.938	207.781		1000000567	157.737	153.098	-1102.48		1000000404	263.63	198.836	-566.132		1000000166	11.9522	172.674	-286.697
1000001109	311.458	194.214	209.212		1000000567	157.245	151.851	-1101.6		1000000404	264.069	199.839	-566.886		1000000166	11.9752	174.713	-286.765
1000001109	312.053	194.171	204.282		1000000567	155.048	152.403	-1103.69		1000000404	263.483	199.555	-566.839		1000000166	11.3793	172.689	-286.856
1000001109	311.533	195.09	206.803		1000000567	156.209	152.672	-1103.24		1000000404	263.373	199.998	-566.706		1000000166	12.6128	172.966	-286.726
1000001109	311.602	194.286	206.256		1000000567	157.378	152.301	-1102.91		1000000404	263.542	199.335	-565.209		1000000166	12.1776	172.776	-286.759
1000001109	311.529	195.042	204.535		1000000567	155.469	152.855	-1102.46		1000000404	263.336	199.299	-565.969		1000000166	13.4254	172.917	-286.752
1000001109	311.683	195.038	206.682		1000000567	156.544	152.629	-1104.02		1000000404	263.363	199.57	-565.076		1000000166	13.4878	172.465	-286.737
1000001109	311.41	195.349	206.111		1000000567	155.899	151.571	-1103.76		1000000404	262.783	198.559	-564.769		1000000166	13.4905	173.052	-286.395
1000001109	311.531	194.905	205.225		1000000567	155.413	152.611	-1102.63		1000000404	262.983	198.262	-566.905		1000000166	13.1797	172.483	-286.616
1000001109	311.599	195.054	206.225		1000000567	156.262	151.315	-1101.88		1000000404	263.431	198.676	-567.412		1000000166	13.192	172.1	-286.603
1000001109	311.25	194.988	208.383		1000000567	155.115	151.959	-1101.59		1000000404	263.644	198.405	-566.666		1000000166	13.2535	172.029	-286.575
1000001109	311.496	195.247	208.592		1000000567	155.355	151.313	-1102.18		1000000404	263.249	199.343	-565.903		1000000166	13.4506	172.435	-286.647
1000001109	311.131	196.432	211.32		1000000567	155.685	151.255	-1102.27		1000000404	263.513	199.816	-564.645		1000000166	13.2514	172.339	-286.66
1000001109	311.46	195.867	206.211		1000000567	156.638	150.459	-1104.1		1000000404	264.117	199.487	-565.858		1000000166	13.1588	171.032	-286.649
1000001109	311.355	195.398	209.022		1000000567	154.282	150.752	-1104.3		1000000404	263.806	199.1	-567.15		1000000166	12.8214	171.626	-286.593
1000001109	311.373	196.278	205.599		1000000567	155.081	150.705	-1104.02		1000000404	264.193	197.751	-567.396		1000000166	12.7137	172.018	-286.57
1000001109	311.756	196.244	208.663		1000000567	154.529	150.872	-1104.36		1000000404	264.441	196.606	-566.815		1000000166	13.0372	172.223	-286.735
1000001109	311.696	195.933	202.472		1000000567	152.432	151.644	-1101.78		1000000404	264.577	198.042	-566.355		1000000166	13.3058	172.806	-286.14
1000001109	311.419	195.825	208.817		1000000567	152.594	151.74	-1101.77		1000000404	264.905	198.239	-566.494		1000000166	12.788	172.837	-286.54
1000001109	312.699	195	209.371		1000000567	153.768	150.956	-1102.87		1000000404	264.704	198.839	-565.099		1000000166	13.7059	172.558	-286.42
1000001109	312.153	195.211	207.932		1000000567	152.306	151.374	-1101.63		1000000404	263.896	198.034	-565.031		1000000166	12.9772	172.826	-286.243
1000001109	311.343	195.85	210.148		1000000567	152.083	151.113	-1104.11		1000000404	264.045	198.194	-564.408		1000000166	12.8371	172.308	-286.724
1000001109	311.86	194.93	203.732		1000000567	150.999	151.788	-1100.93		1000000404	263.12	198.817	-565.851		1000000166	12.7364	171.81	-286.442
1000001109	311.993	194.983	207.636		1000000567	151.174	152.025	-1104.7		1000000404	264.972	198.483	-566.609		1000000166	13.6974	172.526	-286.327
1000001109	312.053	194.901	208.401		1000000567	150.894	152.21	-1100.25		1000000404	265.155	199.173	-564.409		1000000166	13.044	172.692	-286.473
1000001109	312.048	194.805	208.659		1000000567	147.353	153.387	-1100.74		1000000404	264.472	200.619	-562.2		1000000166	12.708	173.185	-286.702
1000001109	311.552	195.173	207.989		1000000567	148.974	153.817	-1100.54		1000000404	265.192	200.421	-562.808		1000000166	13.1509	173.278	-286.624
1000001109	311.473	195.978	206.124		1000000567	147.718	154.56	-1103.52		1000000404	264.639	199.378	-563.598		1000000166	12.9656	173.483	-286.613
1000001109	311.81	194.736	206.778		1000000567	148.176	154.434	-1104.61		1000000404	265.765	198.15	-565.752		1000000166	14.0633	173.675	-286.617
1000001109	312.206	195.509	207.09		1000000584	114.941	102.038	-1085.57		1000000404	265.362	199	-566.398		1000000166	13.5597	173.702	-286.728
1000001109	311.437	195.181	206.673		1000000584	114.809	100.609	-1085.62		1000000404	265.752	197.959	-566.186		1000000166	13.5445	173.422	-286.7
1000001109	312.413	196.031	206.697		1000000584	114.592	99.7953	-1086.51		1000000404	265.758	197.097	-566.737		1000000166	13.8579	173.379	-286.704
1000001109	312.352	195.985	207.65		1000000584	113.286	97.8856	-1086.13		1000000404	266.012	196.282	-566.526		1000000166	13.9453	173.229	-286.733
1000001109	312.195	195.296	204.698		1000000584	114.035	97.4952	-1086.08		1000000404	266.166	195.872	-565.921		1000000166	13.8182	173.539	-286.587
1000001109	312.049	195.936	205.77		1000000584	113.28	97.1569	-1086.16		1000000404	265.451	196.809	-566.083		1000000166	13.6698	174.228	-286.458
1000001109	311.718	195.693	206.168		1000000584	112.266	97.6213	-1084.92		1000000404	264.124	197.568	-566.728		1000000166	13.9021	174.034	-286.377
1000001109	312.809	196.978	207.394		1000000584	112.185	97.8543	-1086.14		1000000404	264.254	197.221	-566.288		1000000166	13.258	173.917	-286.631
1000001109	312.472	196.176	208.647		1000000584	111.584	97.5641	-1085.62		1000000404	264.681	197.199	-565.505		1000000166	13.3312	172.914	-286.42
1000001109	311.538	196.841	207.551		1000000584	111.173	97.0514	-1086.03		1000000404	263.403	197.062	-564.448		1000000166	13.0286	173.391	-286.617
1000001109	311.884	196	207.911		1000000584	110.086	96.4248	-1088.3		1000000404	263.74	196.451	-565.92		1000000166	12.4127	172.551	-286.475
1000001109	312.134	197.061	207.698		1000000584	109.326	96.3635	-1084.98		1000000404	263.257	195.97	-566.519		1000000166	13.1793	172.781	-286.631
1000001109	311.805	197.192	208.406		1000000584	108.599	95.9746	-1085.74		1000000404	263.076	196.218	-566.045		1000000166	12.8732	171.994	-286.496
1000001109	311.586	197.165	208.094		1000000584	107.709	95.4803	-1085.79		1000000404	263.469	195.772	-565.001		1000000166	12.9494	172.48	-286.632
1000001109	312.026	197.034	206.353		1000000584	108.456	95.4234	-1085.64		1000000404	262.706	195.796	-563.021		1000000166	12.586	171.647	-286.675
1000001109	311.917	196.788	207.388		1000000584	106.795	95.1303	-1085.69		1000000404	262.595	195.595	-567.225		1000000166	12.3771	170.969	-286.705
1000001109	311.642	196.548	206.852		1000000584	107.617	95.3472	-1089.43		1000000404	265.968	197.125	-566.582		1000000166	11.8821	171.419	-286.691
1000001109	311.334	196.428	208.438		1000000584	107.297	96.5776	-1085.34		1000000404	265.492	196.82	-561.906		1000000166	12.1594	171.739	-286.811
1000001109	311.21	197.032	207.628		1000000584	108.219	95.9821	-1088.54		1000000404	266.198	197.114	-566.684		1000000166	12.7666	171.652	-286.641
1000001109	311.131	197.41	207.785		1000000584	107.77	96.2565	-1086.25		1000000404	264.847	196.599	-566.609		1000000166	12.4249	170.835	-286.653
1000001109	311.041	197.842	206.898		1000000584	108.365	97.5036	-1088.74		1000000404	264.441	195.142	-567.491		1000000166	12.9067	171.513	-286.548
1000001109	311.744	196.212	204.376		1000000584	107.648	97.7184	-1086.32		1000000404	263.869	194.347	-566.608		1000000166	12.336	170.344	-286.516
1000001109	311.895	196.438	204.063		1000000584	108.655	97.3738	-1088.62		1000000404	267.315	194.411	-566.866		1000000166	12.5387	170.972	-286.703
1000001109	311.426	195.577	204.061		1000000584	108.785	96.7216	-1089.47		1000000404	265.625	195.831	-566.856		1000000166	12.8643	171.294	-286.452
1000001109	311.597	196.408	203.384		1000000584	106.649	97.7875	-1089.65		1000000404	264.337	195.205	-570.465		1000000166	13.9674	172.42	-286.555
1000001109	311.808	196.645	208.446		1000000584	106.366	99.4455	-1088.05		1000000404	262.963	195.148	-566.859		1000000166	13.0422	173.341	-286.235
1000001109	311.9	196.318	204.862		1000000584	104.688	98.071	-1089.22		1000000404	262.501	194.728	-568.404		1000000166	13.1287	173.287	-285.948
1000001109	311.613	196.52	208.777		1000000584	103.531	98.3558	-1085.9		1000000404	261.94	194.608	-568.239		1000000166	13.0132	174.028	-286.54
1000001109	311.022	196.285	207.946		1000000584	102.462	98.1001	-1088.58		1000000404	260.709	194.781	-566.041		1000000166	13.0503	173.944	-286.471
1000001109	311.846	196.469	209.015		1000000631	184.898	157.844	-1121.17		1000000404	262.687	194.76	-565.878		1000000166	12.2694	173.332	-286.656
1000001109	311.638	196.144	208.701		1000000631	185.034	160.467	-1125.22		1000000404	262.645	197.188	-566.826		1000000166	11.6667	173.623	-286.823
1000001109	310.994	196.789	209.236		1000000631	184.102	163.646	-1125.22		1000000404	262.221	196.803	-566.83		1000000166	12.1417	173.821	-286.546
1000001109	310.72	197.721	208.057		1000000631	183.302	165.037	-1125.22		1000000404	260.774	197.02	-567.017		1000000166	11.6637	174.067	-286.616
1000001109	311.512	196.56	206.082		1000000631	184.383	164.899	-1125.22		1000000404	261.129	195.963	-566.628		1000000166	11.0318	173.451	-286.656
1000001109	310.795	196.436	208.248		1000000631	183.901	165.31	-1125.22		1000000404	260.48	195.694	-565.89		1000000166	10.9553	173.226	-286.812
1000001109	310.985	197.024	208.56		1000000631	184.235	165.59	-1125.22		1000000404	260.786	196.107	-566.609		1000000166	11.6459	172.994	-286.826
1000001109	310.952	196.572	207.514		1000000631	184.059	165.386	-1125.22		1000000404	260.201	197.219	-568.269		1000000166	11.4223	173.118	-286.828
1000001109	312.257	197.768	206.208		1000000631	182.947	165.838	-1125.22		1000000404	258.618	196.399	-568.389		1000000166	11.2249	173.811	-286.769
1000001109	311.799	196.145	209.729		1000000631	182.82	165.71	-1125.22		1000000404	259.543	196.871	-571.437		1000000166	11.8976	173.424	-286.829
1000001109	311.193	197.931	206.659		1000000631	184.453	165.294	-1125.22		1000000404	258.637	196.057	-567.24		1000000166	11.1877	173.044	-286.494
1000001109	311.312	196.347	205.349		1000000631	183.026	166.802	-1125.22		1000000404	259.29	195.463	-566.665		1000000166	10.9547	173.455	-286.532
1000001109	311.13	197.855	206.49		1000000631	183.523	165.202	-1125.22		1000000404	258.563	195.063	-567.083		1000000180	119.846	230.601	-275.323
1000001109	311.783	195.828	209.316		1000000631	185.429	166.146	-1125.22		1000000404	259.143	194.579	-566.078		1000000180	121.039	230.417	-277.66
1000001109	311.305	196.335	209.674		1000000631	185.767	166.111	-1125.22		1000000404	259.15	194.363	-570.302		1000000180	120.64	230.622	-281.082
1000001373	221.743	262.795	220.894		1000000631	186.129	166.152	-1125.22		1000000404	257.812	193.253	-566.753		1000000180	120.557	231.282	-282.875
1000001373	222.449	265.01	221.591		1000000631	186.167	166.754	-1125.22		1000000404	258.692	192.99	-566.763		1000000180	120.572	231.145	-285.373
1000001373	222.504	263.649	221.663		1000000631	185.412	167.811	-1125.22		1000000404	257.595	193.493	-566.74		1000000180	120.266	230.85	-286.029
1000001373	222.784	263.664	219.129		1000000631	185.015	166.261	-1125.22		1000000404	256.837	192.846	-566.367		1000000180	119.733	229.908	-286.565
1000001373	221.672	264.356	222.464		1000000631	185.526	164.911	-1125.22		1000000404	257.623	192.842	-566.454		1000000180	119.427	228.119	-286.825
1000001373	221.306	264.989	226.362		1000000631	181.755	164.178	-1125.22		1000000404	257.836	193.174	-567.029		1000000180	119.589	228.864	-287.092
1000001373	222.101	265.498	222.009		1000000631	182.361	164.029	-1125.22		1000000404	258.366	192.314	-567.433		1000000180	119.184	227.481	-287.158
1000001373	221.833	264.917	222.75		1000000631	184.564	165.402	-1125.22		1000000404	257.917	191.455	-567.234		1000000180	119.174	227.016	-287.226
1000001373	221.147	264.469	224.202		1000000631	182.657	166.108	-1125.22		1000000404	258.305	192.122	-566.491		1000000180	119.162	227.101	-287.421
1000001373	223.499	265.296	218.738		1000000631	183.572	165.914	-1125.22		1000000404	258.52	190.149	-566.604		1000000180	119.426	227.97	-287.438
1000001373	220.778	265.77	225.506		1000000639	245.076	121.085	-1113.81		1000000404	257.817	191.307	-566.122		1000000180	119.311	228.935	-287.586
1000001373	221.895	265.26	223.046		1000000639	245.617	122.534	-1113.26		1000000404	258.104	191.167	-566.545		1000000180	119.127	229.478	-287.744
1000001373	220.452	262.44	222.012		1000000639	244.896	122.613	-1114.62		1000000404	259.12	191.658	-567.936		1000000180	119.81	231.507	-286.997
1000001373	220.398	261.098	218.505		1000000639	245.659	121.253	-1115.25		1000000404	258.224	191.21	-567.22		1000000180	119.872	232.677	-286.898
1000001373	218.295	259.594	217.174		1000000639	246.087	120.759	-1115.09		1000000404	258.488	190.075	-566.537		1000000180	120.048	233.292	-286.983
1000001373	219.745	259.424	217.599		1000000639	245.83	120.955	-1113.99		1000000404	258.152	190.208	-566.578		1000000180	119.627	233.767	-286.816
1000001373	221.103	264.177	221.154		1000000639	245.813	121.156	-1114.5		1000000404	257.246	191.085	-568.082		1000000180	119.756	233.92	-286.953
1000001373	222.661	264.519	219.443		1000000639	244.223	121.012	-1114.65		1000000404	258.553	191.62	-566.667		1000000180	119.228	234.09	-286.751
1000001373	219.711	262.384	220.228		1000000639	240.919	120.865	-1113.41		1000000404	257.635	191.319	-566.598		1000000180	118.882	234.448	-286.548
1000001373	221.246	263.079	218.981		1000000639	240.933	120.773	-1114.47		1000000404	257.511	191.79	-568.328		1000000180	118.662	234.093	-286.333
1000001373	221.904	263.752	219.337		1000000639	239.851	120.51	-1114.78		1000000404	258.357	190.608	-566.821		1000000180	119.858	234.401	-286.635
1000001373	221.658	264.506	216.002		1000000639	238.648	120.11	-1114.16		1000000404	258.198	190.734	-567.963		1000000180	121.211	235.034	-285.817
1000001373	222.204	265.619	218.305		1000000639	238.693	119.809	-1114.75		1000000404	257.901	191.12	-567.593		1000000180	121.938	234.871	-285.708
1000001373	220.847	265.747	221.481		1000000639	238.927	120.114	-1112.3		1000000404	256.937	188.882	-567.631		1000000180	122.087	233.846	-285.488
1000001373	221.769	265.011	218.132		1000000639	238.696	118.779	-1112.14		1000000404	256.788	188.431	-568.794		1000000180	122.827	234.082	-284.428
1000001373	221.889	264.482	219.018		1000000639	238.369	118.716	-1112.3		1000000404	256.124	188.161	-567.315		1000000180	122.771	233.009	-285.975
1000001373	222.654	266.062	217.777		1000000639	237.807	118.939	-1111.74		1000000404	256.024	189.23	-566.702		1000000180	121.552	234.504	-285.196
1000001373	221.561	264.299	218.58		1000000639	237.491	118.662	-1111.62		1000000404	257.859	189.79	-567.954		1000000180	120.298	234.505	-286.516
1000001373	221.045	266.281	219.663		1000000639	237.694	118.605	-1112.03		1000000404	259.32	192.186	-567.659		1000000180	119.083	235.101	-286.692
1000001373	221.772	264.877	218.223		1000000639	237.915	118.499	-1111.67		1000000404	259.181	192.126	-566.284		1000000180	119.858	236.014	-286.294
1000001373	220.657	264.656	221.118		1000000639	238.565	117.562	-1114.3		1000000404	260.731	192.212	-570.364		1000000180	120.362	236.606	-286.54
1000001373	221.594	264.261	218.049		1000000639	238.681	117.013	-1115.01		1000000404	259.274	191.864	-567.963		1000000180	120.496	236.577	-286.914
1000001373	221.309	263.954	218.932		1000000639	239.884	116.461	-1115.39		1000000404	257.638	191.554	-566.446		1000000180	120.69	236.713	-287.86
1000001373	220.629	264.958	221.671		1000000639	239.915	117.588	-1115.99		1000000404	257.31	192.405	-567.92		1000000180	119.717	237.317	-287.851
1000001373	221.897	264.915	218.206		1000000639	239.739	117.768	-1115.89		1000000404	257.442	193.256	-567.648		1000000180	119.113	237.2	-287.796
1000001373	222.396	265.117	218.889		1000000639	240.779	118.298	-1116.41		1000000404	257.599	193.615	-568.976		1000000180	118.693	237.388	-287.888
1000001373	221.516	264.322	218.034		1000000639	240.579	118.515	-1116.24		1000000404	256.541	192.582	-568.554		1000000180	119.172	237.286	-287.246
1000001373	221.89	265.341	218.307		1000000639	244.814	119.621	-1119.35		1000000404	256.657	193.554	-569.107		1000000180	118.816	237.053	-287.335
1000001373	221.732	265.299	217.457		1000000639	241.329	119.124	-1116.71		1000000404	256.981	193.021	-567.42		1000000180	118.266	237.769	-287.436
1000001373	220.492	265.517	220.967		1000000639	241.816	119.77	-1116.48		1000000495	37.6546	163.973	-563.073		1000000180	118.403	237.455	-288.522
1000001373	222.305	266.031	219.598		1000000639	244.255	120.726	-1115.71		1000000495	38.6605	163.966	-563.293		1000000180	117.86	237.549	-288.363
1000001373	221.13	264.342	220.566		1000000639	244.691	120.536	-1118.25		1000000495	37.9791	164.734	-568.371		1000000180	117.284	237.381	-288.724
1000001373	220.232	264.857	220.869		1000000639	245.009	122.102	-1119.11		1000000495	39.4965	163.538	-565.345		1000000180	118.09	236.736	-288.221
1000001373	221.02	266.716	220.405		1000000639	245.065	123.141	-1119.46		1000000495	38.0254	163.837	-566.601		1000000180	118.424	236.811	-288.314
1000001373	221.951	265.964	218.314		1000000639	244.902	123.141	-1120.22		1000000495	39.6041	163.564	-566.636		1000000180	117.848	236.817	-286.604
1000001373	222.268	265.36	217.466		1000000639	245.014	123.277	-1119.58		1000000495	41.531	163.813	-566.94		1000000180	117.511	237.127	-286.942
1000001373	221.323	263.285	219.509		1000000639	246.321	121.429	-1119.15		1000000495	41.9834	164.182	-566.431		1000000180	116.977	237.379	-287.23
1000001373	220.524	264.176	220.653		1000000639	246.405	121.113	-1118.22		1000000495	42.8546	163.674	-565.828		1000000180	117.266	237.687	-286.886
1000001373	223.028	265.666	213.737		1000000639	245.812	121.743	-1119.13		1000000495	41.8532	164.517	-566.466		1000000180	117.403	237.647	-287.001
1000001373	221.726	263.851	215.63		1000000639	246.603	121.998	-1120.12		1000000495	43.1513	164.844	-566.491		1000000180	116.888	237.14	-287.588
1000001373	220.458	263.429	217.355		1000000639	246.083	121.983	-1120.37		1000000495	42.8014	164.932	-566.307		1000000180	116.215	236.965	-287.132
1000001373	220.447	263.309	217.104		1000000639	246.334	120.809	-1121.63		1000000495	43.3421	165.951	-566.467		1000000180	116.261	236.818	-286.756
1000001373	220.977	264.154	217.071		1000000639	246.53	121.087	-1115.88		1000000495	42.8402	165.607	-567.142		1000000180	115.633	237.42	-287.148
1000001373	222.41	265.27	214.46		1000000639	247.028	120.666	-1120.04		1000000495	43.1613	165.212	-566.293		1000000180	114.717	237.412	-287.299
1000001373	221.134	264.285	215.968		1000000639	247.593	120.944	-1115.3		1000000495	42.5578	165.364	-566.879		1000000180	113.297	237.601	-287.479
1000001373	223.129	264.656	213.604		1000000639	247.8	120.79	-1120.45		1000000495	41.9604	165.221	-566.486		1000000180	112.006	238.282	-288.55
1000001373	221.922	264.824	216.931		1000000639	246.436	121.288	-1120.13		1000000495	42.5109	165.253	-565.915		1000000180	111.602	238.043	-287.831
1000001373	221.468	264.288	216.035		1000000639	245.912	121.788	-1115.46		1000000495	42.1	164.698	-565.842		1000000180	112.334	237.694	-287.136
1000001373	221.677	265.412	217.072		1000000639	245.76	119.486	-1116.67		1000000495	42.7866	165.348	-565.873		1000000180	111.588	237.648	-287.824
1000001373	222.9	264.24	214.121		1000000639	246.573	121.029	-1118.29		1000000495	42.1613	167.002	-566.803		1000000180	111.123	237.584	-287.055
1000001373	220.958	263.492	215.828		1000000639	244.904	119.598	-1116.95		1000000495	42.1614	166.148	-564.957		1000000180	109.649	237.486	-286.882
1000001373	222.772	266.398	211.396		1000000639	245.8	118.477	-1115.28		1000000495	42.3926	166.282	-564.472		1000000180	109.023	237.383	-287.12
1000001373	222.976	264.462	212.866		1000000639	245.3	116.219	-1115.6		1000000495	43.0259	167.12	-565.503		1000000180	108.855	238.019	-287.212
1000001373	222.137	264.742	213.351		1000000639	245.734	115.56	-1115.68		1000000495	42.4414	166.615	-561.744		1000000180	109.478	237.819	-287.337
1000001373	222.895	265.295	212.334		1000000639	244.385	115.388	-1115.95		1000000495	40.7753	167.416	-558.756		1000000180	108.865	237.783	-287.401
1000001373	221.595	263.67	213.621		1000000639	243.692	115.168	-1117.08		1000000495	42.1553	166.454	-561.319		1000000180	109.691	238.222	-287.804
1000001373	219.757	258.873	212.943		1000000639	243.429	115.189	-1116.58		1000000495	40.0708	165.559	-560.7		1000000180	109.454	238.299	-288.474
1000001373	220.528	262.384	212.364		1000000639	242.199	114.075	-1117.58		1000000495	40.0966	167.38	-557.981		1000000180	109.212	238.1	-287.746
1000001373	220.516	262.755	213.681		1000000639	243.395	114.667	-1116.71		1000000495	39.6625	166.584	-557.522		1000000180	108.951	237.914	-287.66
1000001373	220.354	263.244	215.34		1000000639	244.729	115.33	-1116.06		1000000505	137.102	39.6659	-556.725		1000000180	108.863	238.357	-288.58
1000001373	220.969	264.071	211.765		1000000639	244.813	115.214	-1115.79		1000000505	136.544	39.6502	-557.641		1000000180	108.455	237.903	-287.54
1000001373	221.791	264.902	212.495		1000000639	246.512	115.275	-1115.94		1000000505	137.345	40.7464	-562.601		1000000180	108.163	237.618	-287.771
1000001373	220.379	264.513	215.995		1000000639	247.858	115.64	-1118.07		1000000505	136.814	39.1998	-559.543		1000000180	107.651	237.851	-287.633
1000001373	220.608	262.099	212.801		1000000639	249.391	113.496	-1118.48		1000000505	136.126	38.8103	-558.318		1000000180	108.611	237.66	-287.851
1000001373	220.072	261.203	211.179		1000000639	248.658	113.347	-1119.19		1000000505	135.946	38.8662	-560.694		1000000180	108.408	237.501	-287.387
1000001373	220.443	262.1	212.461		1000000639	248.328	114.038	-1119.23		1000000505	135.911	38.9054	-561.545		1000000180	108.72	237.695	-286.828
1000001373	220.443	261.882	212.31		1000000639	248.525	114.488	-1119.06		1000000505	135.601	39.2099	-561.316		1000000180	108.071	237.2	-286.903
1000001373	220.247	261.784	211.96		1000000639	249.11	113.379	-1119.16		1000000505	136.173	39.8387	-561.227		1000000180	107.902	237.22	-286.465
1000001373	220.801	261.371	209.349		1000000639	248.941	114.141	-1118.27		1000000505	135.911	39.956	-561.388		1000000180	107.942	237.553	-286.671
1000001373	219.52	261.016	211.646		1000000639	247.656	114.227	-1118.6		1000000505	137.038	40.2737	-561.481		1000000180	108.432	237.524	-286.989
1000001373	219.667	260.421	211.577		1000000639	246.2	114.718	-1119.39		1000000505	137.611	41.51	-561.885		1000000180	108.319	237.216	-287.074
1000001373	219.888	260.782	213.731		1000000639	244.622	115.357	-1119.13		1000000505	137.435	42.1277	-563.593		1000000180	108.008	236.97	-286.716
1000001373	219.285	261.683	212.6		1000000639	243.941	115.27	-1114.76		1000000505	137.771	41.8266	-563.828		1000000180	107.961	237.001	-287.083
1000001373	219.912	260.491	209.602		1000000639	242.523	114.529	-1114.6		1000000505	138.076	42.437	-562.212		1000000180	108.014	237.439	-287.329
1000001373	219.056	260.79	212.267		1000000639	243.728	115.004	-1119.26		1000000505	137.212	41.6898	-561.877		1000000180	107.093	236.993	-288.032
1000001373	219.67	261.546	211.24		1000000639	242.232	116.758	-1119.51		1000000505	136.841	41.1616	-561.011		1000000180	106.78	236.66	-283.061
1000001373	219.824	261.311	211.612		1000000639	242.062	116.653	-1119.12		1000000505	136.328	40.6867	-560.444		1000000180	107.185	236.523	-282.614
1000001373	219.844	261.871	212.082		1000000639	243.03	118.348	-1118.62		1000000505	135.75	40.118	-558.163		1000000180	107.141	236.574	-283.604
1000001373	219.532	261.752	211.325		1000000639	243.345	118.064	-1114.53		1000000505	136.186	40.4765	-557.577		1000000180	106.607	236.623	-283.26
1000001373	219.935	262.035	212.944		1000000639	244.635	120.173	-1114.75		1000000505	135.747	40.6337	-557.746		1000000180	106.551	235.781	-283.22
1000001373	220.591	262.509	211.307		1000000639	243.511	120.618	-1114.64		1000000505	136.053	41.1763	-556.008		1000000180	106.283	236.241	-282.841
1000001373	219.9	261.835	212.132		1000000639	243.516	119.657	-1114.46		1000000505	136.482	40.8087	-554.554		1000000180	106.696	237.229	-283.109
1000001373	219.857	261.604	212.232		1000000639	244.42	119.328	-1114.51		1000000505	138.047	41.3389	-556.112		1000000180	106.919	237.055	-283.132
1000001373	219.189	261.527	212.9		1000000639	243.145	119.313	-1114.7		1000000505	137.44	41.5935	-557.359		1000000180	107.011	236.759	-283.121
1000001373	218.35	260.324	211.655		1000000639	243.32	120.61	-1114.46		1000000505	138.058	41.4679	-556.955		1000000180	107.126	236.922	-283.463
1000001373	219.977	263.171	212.749		1000000639	242.267	122.084	-1114.46		1000000505	137.898	41.6709	-556.87		1000000180	107.402	236.99	-283.971
1000001373	219.009	261.844	212.166		1000000639	240.028	122.912	-1113.94		1000000505	137.839	41.637	-557.724		1000000180	107.042	237.114	-282.876
1000001373	219.94	262.553	212.619		1000000639	238.107	125.012	-1114.04		1000000505	138.132	41.5693	-560.15		1000000180	107.5	237.21	-282.724
1000001373	219.093	261.458	212.259		1000000639	241.671	121.89	-1114.42		1000000505	138.212	41.7106	-557.031		1000000180	107.546	237.545	-282.681
1000001373	218.801	261.675	212.854		1000000639	241.367	121.522	-1113.56		1000000505	138.402	41.9386	-557.55		1000000180	106.697	237.144	-282.705
1000001373	219.237	261.523	211.509		1000000639	243.172	120.359	-1114.49		1000000505	137.567	41.2309	-560.324		1000000180	106.418	236.819	-282.662
1000001373	217.826	260.034	212.493		1000000639	244.471	119.989	-1114.62		1000000505	137.84	41.8183	-559.106		1000000180	106.398	236.474	-283.51
1000001373	219.278	260.868	211.933		1000000639	244.7	119.307	-1114.56		1000000505	138.238	42.7675	-556.875		1000000180	107.236	236.71	-282.929
1000001373	218.558	260.782	212.737		1000000639	246.507	120.514	-1114.74		1000000505	137.896	42.676	-556.514		1000000180	106.697	236.547	-283.056
1000001373	218.243	259.428	210.664		1000000639	249.037	125.512	-1114.19		1000000505	137.257	42.3013	-556.868		1000000180	106.88	236.74	-283.932
1000001373	216.387	257.953	212.854		1000000639	248.874	126.339	-1114.27		1000000505	137.367	42.1222	-557.33		1000000180	106.942	237.567	-282.875
1000001373	218.338	259.481	212.302		1000000639	248.649	125.938	-1114.57		1000000505	137.25	42.3018	-557.814		1000000180	107.102	237.636	-283.148
1000001373	218.152	259.758	211.608		1000000639	248.914	128.634	-1114.78		1000000505	137.965	42.7746	-557.249		1000000180	107.106	237.449	-283.34
1000001373	219.825	261.361	212.583		1000000639	248.742	126.967	-1114.29		1000000505	138.264	42.3898	-556.877		1000000180	106.856	236.927	-283.171
1000001373	218.552	261.394	212.584		1000000644	241.107	99.3418	-1108.66		1000000505	137.916	42.8054	-556.446		1000000180	106.74	237.937	-283.646
1000001373	219.839	260.756	207.482		1000000644	241.37	100.295	-1108.97		1000000505	138.02	43.1005	-556.508		1000000180	106.781	237.364	-283.346
1000001373	220.489	262.042	209.481		1000000644	241.111	100.598	-1110.04		1000000505	138.811	43.5354	-556.148		1000000180	106.828	237.582	-284.259
1000001373	218.993	261.029	212.199		1000000644	241.456	99.1721	-1110.81		1000000505	138.448	43.1885	-557.351		1000000180	106.264	236.891	-285.101
1000001373	219.567	259.561	212.735		1000000644	241.52	98.4506	-1110.16		1000000505	138.181	43.7481	-557.341		1000000180	106.726	237.738	-283.557
1000001373	220.428	262.514	211.757		1000000644	241.7	98.6376	-1108.74		1000000505	137.887	43.7331	-557.705		1000000180	106.798	237.979	-283.625
1000001373	220.224	260.867	211.993		1000000644	241.607	98.7746	-1109.65		1000000505	138.084	43.7774	-557.3		1000000180	106.728	238.18	-283.189
1000001373	218.877	260	211.811		1000000644	241.012	98.874	-1110.58		1000000505	137.192	43.8068	-556.506		1000000180	106.261	237.87	-283.461
1000001373	217.825	257.441	207.763		1000000644	241.193	98.24	-1111.09		1000000505	137.909	43.7137	-556.417		1000000180	105.886	237.177	-285.097
1000001373	218.986	260.994	211.468		1000000644	240.705	98.5181	-1112.43		1000000505	137.772	43.4931	-556.446		1000000180	105.484	236.607	-285.404
1000001373	219.76	261.753	211.839		1000000644	240.844	98.6992	-1112.53		1000000505	137.76	44.0712	-556.446		1000000180	106.185	237.297	-284.615
1000001373	219.008	260.832	211.465		1000000644	240.463	97.9686	-1113.84		1000000505	138.401	44.7527	-558.159		1000000180	106.293	237.491	-283.679
1000001373	218.989	262.019	211.416		1000000644	240.973	98.1839	-1113.99		1000000505	138.292	45.8711	-557.369		1000000180	105.931	237.596	-283.265
1000001373	218.876	259.575	212.678		1000000644	241.836	98.6687	-1111.17		1000000505	137.876	45.5991	-557.802		1000000180	106.316	238.168	-283.771
1000001373	219.071	261.481	213.432		1000000644	241.524	98.7053	-1110.76		1000000505	138.489	46.9814	-556.413		1000000180	106.335	237.969	-284.629
1000001373	219.24	263.041	214.99		1000000644	241.337	98.5055	-1111.99		1000000505	138.871	48.8843	-555.929		1000000180	105.995	237.944	-284.547
1000001373	219.876	263.139	211.289		1000000644	241.587	98.6789	-1111.72		1000000505	138.838	48.3518	-555.619		1000000180	106.019	237.605	-285.178
1000001373	219.652	261.241	209.363		1000000644	241.882	98.9765	-1113.51		1000000505	139.171	47.9803	-556.044		1000000180	105.709	237.159	-285.236
1000001373	219.663	263.771	211.649		1000000644	242.176	98.2306	-1111.49		1000000505	139.289	47.5676	-557.165		1000000180	106.611	237.555	-283.33
1000001373	219.396	261.263	212.484		1000000644	241.459	97.5433	-1113.51		1000000505	138.799	47.0573	-558.345		1000000180	106.302	238.017	-283.498
1000001373	219.745	263.612	211.353		1000000644	240.664	98.2726	-1114.89		1000000505	138.516	46.8753	-557.705		1000000180	106.344	237.601	-283.08
1000001373	219.421	263.637	216.196		1000000644	241.042	98.1028	-1115.08		1000000505	137.74	46.3221	-558		1000000180	105.829	237.455	-283.578
1000001373	219.044	263.034	215.731		1000000644	241.277	97.675	-1113.12		1000000505	138.275	46.7437	-557.128		1000000180	105.786	238.192	-283.163
1000001373	219.079	263.169	215.305		1000000644	241.763	98.6014	-1113.54		1000000505	138.929	47.0532	-556.683		1000000180	105.892	238.428	-284.431
1000001373	219.762	264.402	215.996		1000000644	240.979	98.8548	-1114.19		1000000505	138.13	47.3831	-556.618		1000000180	106.043	238.55	-284.318
1000001373	220.652	264.199	211.142		1000000644	241.217	99.2347	-1114.89		1000000505	137.902	47.8497	-557.765		1000000180	105.627	237.743	-284.772
1000001373	220.696	264.158	212.991		1000000644	240.888	98.1929	-1115.63		1000000505	137.982	48.456	-557.554		1000000180	105.922	238.536	-283.851
1000001373	219.029	262.583	216.267		1000000644	240.869	98.3243	-1115.98		1000000505	138.184	47.4992	-556.751		1000000180	105.375	238.639	-283.769
1000001373	221.227	264.555	212.802		1000000644	240.612	98.0321	-1115.14		1000000505	138.186	46.9925	-557.87		1000000180	105.221	238.182	-283.473
1000001373	221.968	264.645	212.269		1000000644	240.885	97.8609	-1115.81		1000000505	137.754	46.9192	-557.195		1000000180	105.25	237.839	-284.933
1000001373	221.427	264.813	212.442		1000000644	241.039	98.2971	-1114.6		1000000505	137.906	46.9403	-556.996		1000000180	105.734	238.594	-284.076
1000001373	220.346	265.476	215.368		1000000644	241.254	98.0936	-1115.48		1000000505	138.479	47.0236	-556.402		1000000180	105.64	238.432	-284.024
1000001373	222.214	265.224	211.737		1000000644	240.892	98.5008	-1115.19		1000000505	138.583	47.2778	-555.609		1000000180	105.884	237.838	-283.793
1000001373	222.13	265.415	211.991		1000000644	240.937	98.1947	-1115.17		1000000505	138.43	47.3668	-557.455		1000000180	105.516	237.802	-283.829
1000001373	221.767	265.204	213.196		1000000644	240.893	98.3885	-1115.52		1000000505	138.893	47.4241	-556.624		1000000180	105.462	238.147	-283.244
1000001373	221.293	264.198	213.357		1000000644	240.809	97.915	-1115.11		1000000505	138.415	47.7936	-556.623		1000000180	106.112	238.061	-282.804
1000001373	219.654	265.008	215.786		1000000644	241.358	97.9295	-1114.7		1000000505	138.164	47.0735	-559.871		1000000180	106.479	237.926	-282.898
1000001373	219.968	265.233	216.209		1000000644	241.408	97.3457	-1114.41		1000000505	138.787	46.9776	-557.385		1000000180	106.544	237.96	-283.047
1000001373	219.541	265.529	216.709		1000000644	241.246	96.8249	-1114.53		1000000505	139.181	48.2285	-556.382		1000000180	106.537	238.653	-283.582
1000001373	219.369	264.776	215.653		1000000644	241.308	97.8375	-1115.17		1000000505	139.672	47.5435	-556.666		1000000180	106.003	238.239	-283.617
1000001373	218.451	263.952	216.591		1000000644	241.21	97.36	-1114.48		1000000505	138.926	47.4599	-556.839		1000000180	105.575	238.2	-285.004
1000001373	218.159	263.268	215.822		1000000644	240.994	97.4018	-1114.87		1000000505	139.147	47.6814	-556.619		1000000180	106.28	238.535	-285.311
1000001373	219.898	265.527	216.09		1000000644	241.006	97.441	-1110.42		1000000505	138.296	48.7914	-558.184		1000000180	106.145	238.391	-285.194
1000001373	221.578	264.646	213.772		1000000644	241.264	97.086	-1112.99		1000000505	139.719	48.6174	-557.168		1000000180	106.174	238.938	-284.208
1000001373	219.541	264.704	216.431		1000000644	241.566	97.5674	-1110.78		1000000505	139.052	48.8473	-559.16		1000000180	106.447	238.523	-283.892
1000001373	220.735	265.404	215.821		1000000644	240.974	97.044	-1115.97		1000000505	138.926	48.8491	-557.731		1000000180	106.802	238.393	-283.894
1000001373	221.07	265.451	215.876		1000000644	240.606	96.9393	-1115.46		1000000505	139.16	48.2566	-558.327		1000000180	105.988	238.408	-284.893
1000001373	219.098	264.623	216.575		1000000644	240.839	97.2155	-1110.7		1000000505	139.198	48.4172	-556.959		1000000180	106.055	238.15	-285.5
1000001373	222.487	265.208	214.254		1000000644	240.592	96.779	-1110.74		1000000505	139.137	48.973	-557.233		1000000180	106.467	238.493	-284.811
1000001373	220.19	268.03	217.18		1000000644	240.374	97.2097	-1112.14		1000000505	139.295	48.6858	-557.348		1000000180	105.584	238.466	-284.814
1000001373	220.066	266.226	217.166		1000000644	240.877	97.1172	-1111.6		1000000505	139.616	48.5584	-556.742		1000000180	106.255	238.517	-283.902
1000001373	218.972	267.162	216.839		1000000644	241.182	97.1358	-1110.99		1000000505	139.031	48.9383	-555.961		1000000180	106.044	238.139	-284.845
1000008358	218.114	196.053	218.682		1000000644	241.401	96.6486	-1111.72		1000000505	139.567	49.2578	-557.15		1000000180	106.522	238.195	-283.867
1000008358	214.729	195.644	213.251		1000000644	240.852	96.536	-1110.82		1000000505	139.895	49.3672	-556.027		1000000180	106.217	238.871	-284.929
1000008358	211.93	195.766	211.381		1000000644	240.909	96.1689	-1111.24		1000000505	139.272	50.0688	-555.296		1000000180	106.125	238.25	-284.865
1000008358	210.482	196.11	213.26		1000000644	240.53	96.0693	-1112.31		1000000505	139.42	49.1831	-554.376		1000000180	106.943	238.761	-284.054
1000008358	209.715	195.668	211.362		1000000644	240.007	96.6144	-1110.97		1000000505	139.388	48.9375	-555.886		1000000180	106.464	237.965	-285.344
1000008358	209.064	196.678	211.429		1000000644	239.895	96.3832	-1111.55		1000000505	139.398	49.0094	-554.384		1000000180	106.416	237.984	-284.967
1000008358	208.632	196.445	212.01		1000000644	240.643	96.967	-1110.91		1000000505	139.151	48.3377	-555.76		1000000193	214.267	191.506	-292.21
1000008358	208.548	196.66	211.777		1000000644	241.203	96.2682	-1110.85		1000000505	139.4	48.5711	-554.88		1000000193	214.01	193.372	-292.21
1000008358	208.003	197.489	210.915		1000000644	240.624	96.6782	-1111.5		1000000505	139.161	48.6386	-555.545		1000000193	213.702	192.926	-292.21
1000008358	206.68	198.273	207.486		1000000644	240.646	96.691	-1110.52		1000000505	139.305	49.3558	-556.102		1000000193	212.794	195.339	-292.21
1000008358	204.305	202.635	207.07		1000000644	240.389	96.5042	-1111.05		1000000505	139.537	48.7265	-555.854		1000000193	212.166	195.604	-292.21
1000008358	203.101	204.433	207.596		1000000644	240.818	96.4307	-1112.11		1000000505	139.175	48.4952	-556.14		1000000193	211.17	195.822	-292.21
1000008358	202.912	204.486	206.889		1000000644	240.868	96.8695	-1111.94		1000000505	139.621	48.8779	-554.466		1000000193	216.072	193.844	-292.21
1000008358	202.26	205.554	206.869		1000000644	240.585	96.4116	-1114.37		1000000505	139.703	48.2932	-553.978		1000000193	216.474	194.509	-292.21
1000008358	198.094	208.607	206.091		1000000644	240.631	97.3623	-1113.53		1000000505	139.483	48.7584	-552.908		1000000193	218.561	194.564	-292.21
1000008358	199.279	207.995	203.194		1000000644	241.111	96.8116	-1112.84		1000000505	139.066	48.4819	-553.447		1000000193	218.336	195.745	-292.21
1000008358	198.137	208.822	203.881		1000000644	240.645	97.0473	-1111.56		1000000505	138.507	48.0971	-555.721		1000000193	216.291	195.237	-292.21
1000008358	196.475	209.586	204.548		1000000644	240.853	97.5091	-1111.6		1000000505	138.907	48.6829	-555.16		1000000193	216.42	193.435	-292.21
1000008358	197.034	209.055	205.94		1000000644	241.381	97.9082	-1114.99		1000000505	138.753	48.4373	-554.783		1000000193	214.695	194.652	-292.21
1000008358	197.681	207.93	203.929		1000000644	240.819	97.5407	-1114.92		1000000505	139.061	48.2681	-553.076		1000000193	214.99	193.018	-292.21
1000008358	197.975	208.284	206.403		1000000644	240.71	97.7847	-1110.75		1000000505	139.477	48.0636	-552.613		1000000193	215.028	192.358	-292.21
1000008358	197.436	208.696	206.349		1000000644	240.512	97.5118	-1110.41		1000000505	139.835	48.3598	-552.38		1000000213	245.387	228.104	-286.732
1000008358	199.303	207.397	205.873		1000000644	241.016	97.1831	-1114.73		1000000505	139.09	48.4363	-554.075		1000000213	246.933	229.141	-286.938
1000008358	200.87	206.853	205.061		1000000644	241.348	97.0919	-1115.14		1000000505	140.181	48.1269	-555.218		1000000213	246.997	229.077	-287.476
1000008358	201.431	206.894	206.326		1000000644	240.704	95.9032	-1114.9		1000000505	139.383	48.257	-554.225		1000000213	247.181	229.34	-286.995
1000008358	202.477	205.268	205.618		1000000644	241.022	95.8801	-1113.33		1000000505	140.124	48.0241	-552.73		1000000213	247.356	229.372	-287.021
1000008358	202.551	205.253	206.863		1000000644	240.417	95.3659	-1109.98		1000000505	139.397	47.929	-552.663		1000000213	247.937	228.973	-286.635
1000008358	203.842	204.743	206.665		1000000644	240.384	96.0567	-1110.41		1000000505	141.017	48.1123	-552.241		1000000213	249.397	230.115	-286.444
1000008358	204.218	203.733	206.846		1000000644	240.753	96.6331	-1111.21		1000000505	140.539	48.4058	-552.727		1000000213	251.079	231.776	-286.497
1000008358	204.72	202.212	206.778		1000000644	240.685	96.5176	-1111.66		1000000505	140.356	48.0412	-554.855		1000000213	253.163	234.625	-287.37
1000008358	205.49	201.6	207.498		1000000644	240.364	96.1446	-1111.48		1000000505	140.352	47.9356	-555.571		1000000213	253.939	235.598	-289.294
1000008358	206.556	200.372	207.676		1000000644	240.75	95.6216	-1110.65		1000000505	140.033	47.975	-553.888		1000000213	253.775	235.564	-288.26
1000008358	206.875	199.769	206.973		1000000644	241.283	95.77	-1110.33		1000000505	139.749	48.0544	-552.475		1000000213	254.537	236.371	-292.21
1000008358	208.537	199.497	207.653		1000000644	240.883	95.9855	-1109.92		1000000505	139.563	47.5625	-552.115		1000000213	255.958	237.074	-292.21
1000008358	209.546	200.51	208.189		1000000644	240.26	95.4022	-1110.37		1000000505	140.076	47.3946	-552.291		1000000213	257.287	238.189	-292.21
1000008358	212.455	200.859	208.501		1000000644	240.543	95.278	-1110.7		1000000505	140.14	47.335	-552.288		1000000213	257.217	239.359	-292.21
1000008358	213.73	201.259	208.179		1000000644	239.988	94.6934	-1111.4		1000000505	139.801	47.4196	-552.453		1000000213	257.398	240.173	-292.21
1000008358	215.66	202.097	209.581		1000000644	240.61	95.1599	-1110.23		1000000505	140.238	47.1457	-555.161		1000000213	257.27	240.478	-292.21
1000008358	215.475	201.25	208.516		1000000644	240.521	95.013	-1111.34		1000000505	140.287	47.0462	-552.648		1000000213	257.988	241.432	-292.21
1000008358	217.165	201.652	208.993		1000000644	240.699	94.5402	-1111.93		1000000505	139.858	46.7727	-552.438		1000000213	257.713	241.324	-292.21
1000017485	321.364	219.437	202.314		1000000644	240.614	95.3079	-1110.87		1000000505	140.387	47.0507	-551.709		1000000213	258.54	241.374	-292.21
1000017485	319.616	219.314	205.08		1000000644	240.176	95.0974	-1110.25		1000000505	140.567	46.9745	-551.971		1000000213	258.611	241.906	-292.21
1000017485	319.541	218.468	203.546		1000000644	240.548	96.4748	-1111.49		1000000505	140.336	47.3483	-552.318		1000000213	257.541	241.644	-292.21
1000017485	317.733	217.495	202.825		1000000644	240.006	94.9925	-1111.44		1000000505	140.484	47.6524	-554.912		1000000213	259.014	241.415	-292.21
1000017485	314.197	215.862	207.785		1000000644	240.508	95.4377	-1113.72		1000000505	140.833	47.1393	-554.086		1000000213	258.809	241.047	-292.21
1000017485	311.324	214.036	209.276		1000000644	240.34	95.4301	-1111.77		1000000505	141.038	47.1188	-554.105		1000000213	258.369	240.604	-292.21
1000017485	309.126	213.565	208.959		1000000644	240.58	94.9187	-1114		1000000505	140.44	47.0828	-553.698		1000000213	260.077	240.822	-289.004
1000017485	309.545	213.106	207.965		1000000644	240.767	95.1896	-1112.67		1000000505	140.922	47.6044	-553.102		1000000213	260.067	240.848	-292.21
1000017485	308.486	212.589	207.362		1000000644	241.037	95.3122	-1113.69		1000000505	142.327	48.093	-552.234		1000000213	260.549	242.013	-288.245
1000017485	308.694	211.702	203.586		1000000644	240.498	96.7697	-1113.61		1000000505	141.322	48.1065	-552.471		1000000213	261.768	241.723	-288.43
1000017485	311.134	209.576	204.256		1000000644	240.259	96.0447	-1113.8		1000000505	141.401	47.6588	-552.524		1000000213	262.191	241.684	-287.306
1000017485	309.387	210.502	203.515		1000000644	240.877	96.6667	-1114.74		1000000505	141.262	47.3057	-551.988		1000000213	262.585	241.604	-286.951
1000017485	311.3	209.342	204.495		1000000644	240.117	96.8129	-1113.74		1000000505	141.225	46.5237	-552.518		1000000213	262.912	242.595	-286.825
1000017485	311.158	209.812	205.047		1000000644	240.99	96.184	-1113.96		1000000505	140.867	46.5885	-555.391		1000000213	265.374	244.743	-285.115
1000017485	313.087	209.894	207.671		1000000644	240.818	95.8741	-1114.51		1000000505	141.248	46.9233	-552.454		1000000213	266.679	246.571	-285.618
1000017485	314.854	209.108	208.554		1000000644	241.197	96.1984	-1113.24		1000000505	141.155	46.9193	-551.871		1000000213	266.587	246.033	-285.8
1000017485	320.394	207.629	209.335		1000000644	240.41	95.8098	-1114.05		1000000505	141.324	46.9571	-552.146		1000000213	267.538	246.694	-286.828
1000017485	325.035	207.797	211.091		1000000644	240.298	96.5148	-1114.54		1000000505	141.806	46.7467	-551.831		1000000213	268.283	247.83	-286.176
1000017485	328.922	206.082	211.38		1000000644	240.514	96.0234	-1109.67		1000000505	141.518	46.9229	-556.542		1000000213	268.643	248.179	-285.981
1000017485	332.445	207.226	207.517		1000000644	240.823	96.4597	-1109.7		1000000505	141.521	46.1456	-555.712		1000000213	268.505	248.877	-286.762
1000017485	333.954	210.538	208.096		1000000644	240.862	95.6804	-1109.73		1000000505	141.088	45.5054	-550.583		1000000213	269.044	249.078	-286.502
1000017485	333.603	210.112	206.773		1000000644	240.609	95.6006	-1114.42		1000000505	140.807	45.3561	-556.36		1000000213	269.71	249.11	-287.009
1000017485	334.369	211.58	206.396		1000000644	240.792	96.4801	-1114.6		1000000505	140.447	45.0954	-555.754		1000000213	270.551	250.316	-286.435
1000017485	335.155	213.692	202.68		1000000644	240.749	95.8354	-1114.58		1000000505	141.585	46.2082	-556.029		1000000213	270.557	250.508	-287.021
1000017485	334.577	216.533	204.069		1000000644	240.645	95.3927	-1109.48		1000000505	141.896	47.0569	-556.067		1000000213	271.398	250.737	-286.663
1000017485	335.17	218.715	199.212		1000000644	239.597	95.2638	-1109.77		1000000505	141.548	46.0901	-553.704		1000000213	271.765	251.125	-286.753
1000020503	23.0762	303.575	192.4		1000000644	240.233	96.4207	-1109.99		1000000505	142.476	46.7632	-555.403		1000000213	272.289	250.092	-287.259
1000020503	18.3455	299.288	192.4		1000000644	240.857	96.2671	-1109.94		1000000505	142.112	46.6341	-555.801		1000000213	272.294	250.469	-286.967
1000020503	19.1946	300.99	192.4		1000000644	240.326	96.0296	-1109.49		1000000505	141.733	46.8967	-553.292		1000000213	271.59	250.149	-286.893
1000020503	19.0059	297.533	192.4		1000000644	240.4	96.4228	-1109.63		1000000505	142.116	47.2227	-553.175		1000000213	272.395	249.786	-286.745
1000020503	18.5278	298.153	192.4		1000000644	241.089	96.1357	-1109.71		1000000505	142.949	46.7938	-553.179		1000000213	271.88	248.767	-287.425
1000020503	14.7775	295.583	192.4		1000000812	38.5749	172.466	-1116.39		1000000505	142.005	46.1912	-553.173		1000000213	273.194	249.787	-287.292
1000020503	8.30155	293.277	192.4		1000000812	38.5057	172.985	-1115.91		1000000505	142.278	46.302	-551.422		1000000213	273.123	248.934	-287.588
1000020503	6.74875	293.369	192.4		1000000812	38.3894	173.282	-1116.04		1000000505	142.298	46.8489	-549.072		1000000213	273.328	248.945	-287.461
1000020503	4.47055	293.879	192.4		1000000812	39.1026	172.563	-1118.81		1000000505	143.141	46.6488	-550.274		1000000213	274.212	248.155	-287.293
1000020503	0	290.292	192.4		1000000812	38.2717	171.9	-1116.61		1000000505	141.966	45.9493	-550.663		1000000213	274.179	247.357	-287.842
1000020503	0	292.194	192.4		1000000812	38.7922	171.88	-1115.1		1000000505	142.145	45.9357	-550.672		1000000213	273.988	245.304	-288.245
1000020503	0	288.2	196.781		1000000812	38.4859	172.473	-1115.06		1000000505	142.489	46.7957	-547.113		1000000213	274.201	244.429	-292.21
1000020503	0	288.313	196.933		1000000812	37.8961	172.767	-1115.63		1000000505	142.444	46.2213	-549.311		1000000213	273.722	244.759	-292.21
1000020503	0	290.449	195.511		1000000812	37.7073	172.824	-1115.24		1000000505	142.899	46.3854	-550.921		1000000213	273.91	245.427	-292.21
1000020503	4.52436	286.261	196.501		1000000812	37.0931	173.342	-1116.84		1000000505	143.06	46.9293	-550.145		1000000213	272.986	246.179	-287.829
1000020503	7.35777	285.062	200.872		1000000812	36.369	173.404	-1117.52		1000000505	143.337	47.2649	-550.841		1000000213	273.373	246.19	-287.665
1000020503	8.87466	284.897	201.756		1000000812	36.9047	173.41	-1117.44		1000000505	143.047	47.5966	-549.382		1000000213	273.569	246.712	-292.21
1000020503	8.99578	284.718	202.579		1000000812	36.4578	173.314	-1117.89		1000000505	142.566	46.9041	-549.906		1000000213	274.447	246.629	-287.695
1000020503	10.5914	283.694	203.729		1000000812	36.2463	174.23	-1116.18		1000000505	142.488	46.7925	-548.227		1000000213	273.901	247.358	-287.074
1000020503	13.3341	284.641	206.462		1000000812	35.918	174.539	-1113.79		1000000505	142.933	46.1813	-547.001		1000000213	274.569	246.742	-287.38
1000020503	12.9795	284.8	207.402		1000000812	35.7255	175.36	-1115.53		1000000505	143.391	46.4166	-546.97		1000000213	274.928	246.676	-287.273
1000020503	12.4047	285.282	205.088		1000000812	35.655	176.473	-1115.51		1000000505	142.73	45.6922	-546.53		1000000213	276.052	246.167	-287.719
1000020503	13.5041	286.105	208.278		1000000812	35.1077	178.519	-1115.32		1000000505	142.963	46.1665	-547.116		1000000213	277.401	245.097	-287.44
1000020503	14.1421	285.731	207.765		1000000812	35.3977	179.422	-1115.36		1000000505	143.346	46.3271	-544.25		1000000213	277.834	243.607	-287.829
1000020503	14.8234	284.614	207.386		1000000812	35.6433	179.183	-1114.11		1000000505	142.632	46.5242	-545.574		1000000213	277.704	243.801	-287.821
1000020503	15.685	285.356	206.966		1000000812	35.16	179.394	-1114.83		1000000505	142.634	45.8058	-547.577		1000000213	279.323	243.251	-292.21
1000020503	14.4517	285.066	207.001		1000000812	35.0298	180.239	-1113.83		1000000505	142.554	46.134	-546.564		1000000213	280.797	243.009	-288.212
1000020503	15.6123	284.8	206.597		1000000812	35.6544	179.977	-1114.12		1000000505	143.917	46.7408	-547.665		1000000213	280.914	243.457	-292.21
1000020503	14.6706	285.623	206.694		1000000812	35.7088	180.285	-1113.48		1000000505	143.533	46.3247	-546.941		1000000213	282.28	242.37	-287.349
1000020503	15.6599	285.042	204.361		1000000812	35.2138	180.921	-1112.33		1000000505	142.355	45.7306	-544.793		1000000213	282.09	241.876	-289.482
1000020503	13.9405	285.538	201.852		1000000812	35.909	180.927	-1112.39		1000000505	142.703	45.4441	-550.664		1000000213	282.354	241.396	-292.21
1000020503	13.4669	284.92	202.182		1000000812	35.7505	180.918	-1113.76		1000000505	141.677	42.6725	-548.05		1000000213	283.096	241.415	-287.983
1000020503	13.5858	285.092	201.56		1000000812	35.5067	181.811	-1114.44		1000000505	140.797	40.2424	-546.967		1000000213	282.989	240.385	-287.375
1000020503	12.503	284.807	200.839		1000000812	35.5418	181.162	-1114.83		1000000505	140.755	39.5661	-546.788		1000000213	286.046	239.823	-287.051
1000020503	11.6769	284.791	199.703		1000000812	33.8831	182.038	-1112.44		1000000505	139.955	38.4153	-546.531		1000000213	289.03	239.578	-286.467
1000020503	10.8267	285.828	200.296		1000000812	35.6218	181.769	-1111.64		1000000505	140.161	36.8736	-546.302		1000000213	290.682	239.322	-288.348
1000020503	10.0381	283.585	196.442		1000000812	36.056	180.933	-1112.42		1000000505	140.278	37.7696	-547.165		1000000213	291.533	240.152	-292.21
1000020503	10.9831	284.961	197.857		1000000812	35.8892	181.901	-1113.07		1000000505	139.797	37.4731	-545.463		1000000213	294.51	240.358	-292.21
1000020503	10.2541	284.742	197.376		1000000812	35.5711	182.063	-1112.25		1000000505	139.652	38.7141	-546.237		1000000213	296.772	240.973	-292.21
1000020503	10.1122	283.785	197.102		1000000812	36.5612	181.214	-1112.13		1000000505	139.239	38.3271	-544.428		1000000213	297.332	240.841	-292.21
1000020503	10.4261	285.624	200.481		1000000812	37.8478	180.918	-1113.71		1000000505	140.087	38.2182	-545.977		1000000213	299.779	240.983	-292.21
1000020503	10.7652	283.881	194.947		1000000812	38.0817	180.649	-1110.33		1000000505	140.247	37.8911	-545.119		1000000213	300.644	241.22	-286.168
1000020503	10.904	284.192	197.398		1000000812	38.5627	180.445	-1110.06		1000000505	139.459	38.5233	-544.99		1000000213	301.912	242.135	-286.257
1000020503	10.8165	284.6	198.851		1000000812	38.3853	180.01	-1113.5		1000000505	139.514	37.7271	-547.479		1000000213	306.154	240.592	-285.407
1000020503	11.689	283.223	198.278		1000000812	38.1977	181.123	-1111.39		1000000541	138.45	68.2226	-552.269		1000000213	307.915	242.454	-283.686
1000020503	11.3994	284.498	198.63		1000000812	38.9374	180.962	-1111.81		1000000541	138.542	68.0143	-554.467		1000000213	309.869	239.812	-286.395
1000020503	11.3484	284.058	198.338		1000000812	37.9665	181.079	-1110.6		1000000541	138.206	68.7997	-556.007		1000000213	311.923	238.071	-285.721
1000020503	11.3495	283.695	197.978		1000000812	37.8616	180.629	-1108.71		1000000541	138.099	68.716	-557.489		1000000213	311.06	238.728	-286.168
1000020503	10.8302	284.869	196.403		1000000812	38.4922	181.198	-1110.46		1000000541	138.624	68.2799	-555.537		1000000225	248.78	187.793	-281.46
1000020503	10.7013	284.319	197.965		1000000812	38.8737	181.279	-1106.57		1000000541	138.125	68.3605	-557.12		1000000225	248.592	187.345	-278.711
1000020503	11.4768	285.269	196.787		1000000812	38.8647	181.548	-1110.58		1000000541	138.363	67.3913	-557.352		1000000225	247.69	186.48	-280.085
1000020503	11.4315	284.944	196.537		1000000812	38.5144	181.566	-1110.89		1000000541	139.097	67.353	-557.205		1000000225	247.137	187.72	-282.215
1000020503	11.2895	284.328	196.337		1000000812	38.2809	181.608	-1106.44		1000000541	138.885	67.1035	-556.907		1000000225	247.286	190.986	-283.043
1000020503	10.715	283.994	197.916		1000000812	38.0914	181.796	-1105.67		1000000541	138.744	67.9014	-557.093		1000000225	246.775	190.154	-282.361
1000020503	11.665	283.929	197.162		1000000812	37.1433	181.998	-1106.41		1000000541	138.379	67.6897	-557.389		1000000225	246.607	189.322	-282.478
1000020503	11.8021	284.199	197.115		1000000812	37.4406	182.207	-1106.22		1000000541	138.392	68.4718	-556.845		1000000225	246.256	189.996	-281.54
1000020503	11.4549	283.047	192.4		1000000812	37.8567	181.82	-1103.59		1000000541	137.924	68.8854	-560.592		1000000225	247.003	187.49	-281.355
1000020503	11.4217	285.234	196.768		1000000812	38.7699	181.637	-1105.64		1000000541	138.565	68.7565	-560.794		1000000225	248.06	186.188	-278.356
1000020503	11.3357	285.16	195.801		1000000812	37.7976	181.702	-1105.19		1000000541	138.517	69.5077	-557.776		1000000225	249.075	181.784	-280.943
1000020503	11.0424	284	197.799		1000000812	37.6915	181.442	-1105.65		1000000541	138.786	68.3043	-557.787		1000000225	247.409	182.691	-281.953
1000020503	12.0381	285.083	196.306		1000000812	37.6868	181.166	-1105.75		1000000541	138.505	68.6015	-557.674		1000000225	247.486	179.572	-283.311
1000020503	11.6044	283.964	192.4		1000000812	37.1471	181.493	-1106.69		1000000541	138.35	68.8976	-558.83		1000000225	247.847	176.002	-282.674
1000020503	12.1137	285.389	195.964		1000000812	37.8663	181.961	-1107.73		1000000541	138.96	68.6694	-557.685		1000000225	249.147	174.373	-282.37
1000020503	10.9152	283.69	192.4		1000000812	36.3969	181.26	-1104.6		1000000541	138.637	69.4694	-557.104		1000000225	249.631	173.496	-282.03
1000020503	11.9609	284.623	196.56		1000000812	37.1059	181.362	-1104.66		1000000541	139.464	69.3626	-560.328		1000000225	252.584	171.529	-282.171
1000020503	12.3914	284.81	197.253		1000000812	35.3785	179.89	-1103.99		1000000541	139.545	69.351	-560.435		1000000225	252.593	170.008	-282.02
1000020503	11.4089	284.281	192.4		1000000812	36.4418	180.33	-1104.6		1000000541	138.833	69.4639	-558.021		1000000225	252.462	169.574	-281.937
1000020503	10.9637	283.442	192.4		1000000812	36.0079	180.879	-1104.3		1000000541	139.421	70.8235	-557.88		1000000225	254.843	168.029	-282.095
1000020503	11.5605	283.983	197.539		1000000812	34.2915	176.114	-1099.88		1000000541	139.048	70.0095	-557.294		1000000225	254.747	168.863	-281.758
1000020503	11.151	285.347	196.664		1000000812	35.1775	178.95	-1104.15		1000000541	138.918	70.2062	-557.781		1000000225	255.809	168.68	-281.783
1000020503	11.2969	285.347	196.748		1000000812	34.7537	178.217	-1104.64		1000000541	138.903	70.7894	-557.262		1000000225	257.247	168.835	-281.86
1000020503	10.8563	283.962	192.4		1000000812	33.0763	176.55	-1101.8		1000000541	138.319	70.8862	-558.913		1000000225	252.525	169.077	-282.172
1000020503	9.66302	284.177	196.559		1000000812	33.3329	176.97	-1101.54		1000000541	138.694	70.7807	-561.395		1000000225	257.528	169.07	-280.761
1000020503	10.1947	284.782	192.4		1000000812	34.3672	178.775	-1103.86		1000000541	139.257	69.9309	-558.357		1000000225	252.505	169.736	-281.714
1000020503	8.197	285.441	192.4		1000000812	33.9233	179.039	-1104.86		1000000541	139.4	69.4405	-557.869		1000000225	250.428	169.352	-282.365
1000020503	8.42251	284.748	192.4		1000000812	33.9276	179.169	-1105.81		1000000541	138.865	69.6883	-558.28		1000000225	250.485	168.971	-282.279
1000020503	6.87172	284.706	192.4		1000000812	33.8374	179.375	-1107.41		1000000541	138.933	69.4988	-558.945		1000000225	248.899	168.89	-282.538
1000020503	8.12604	285.039	192.4		1000000812	34.3568	180.265	-1104.87		1000000541	139.3	69.0523	-557.295		1000000225	247.921	167.012	-284.292
1000020503	7.17951	283.609	192.4		1000000812	33.0663	180.172	-1100.93		1000000541	139.344	69.7543	-557.346		1000000225	246.893	166.96	-283.701
1000020503	9.01019	284.441	195.628		1000000812	33.7778	180.314	-1106.13		1000000541	138.844	69.9609	-558.934		1000000225	246.467	166.455	-284.382
1000020503	9.53761	284.531	196.935		1000000812	34.4292	179.835	-1107.15		1000000541	139.187	70.0478	-561.314		1000000225	245.171	163.805	-286.996
1000020503	9.02572	284.695	197.092		1000000812	34.752	179.392	-1106.55		1000000541	138.654	71.2228	-561.703		1000000225	244.848	163.757	-288.009
1000020503	10.0497	283.871	192.4		1000000812	34.1391	179.116	-1107.38		1000000541	139.16	70.5745	-561.155		1000000225	244.424	164.017	-287.601
1000020503	10.9225	283.676	192.4		1000000812	34.1465	178.876	-1102.38		1000000541	139.188	71.1907	-558.476		1000000225	241.558	158.549	-292.21
1000020503	10.3859	284.058	196.234		1000000812	32.911	178.195	-1101.02		1000000541	138.553	69.8439	-557.511		1000000225	243.635	162.596	-289.202
1000020503	11.1373	284.706	196.859		1000000812	34.1275	180.174	-1105.17		1000000541	138.796	70.3855	-557.891		1000000225	244.189	163.215	-287.962
1000020503	9.85098	284.488	196.322		1000000812	32.9924	180.817	-1104.69		1000000541	139.304	70.2917	-559.902		1000000225	244.995	163.807	-287.029
1000020503	11.0259	283.249	192.4		1000000812	33.7541	180.149	-1104.67		1000000541	139.38	69.6335	-561.057		1000000225	245.959	163.317	-287.146
1000020503	11.6039	283.803	192.4		1000000812	33.3676	179.991	-1104.05		1000000541	139.22	69.1182	-560.05		1000000225	246.599	161.334	-287.265
1000020503	11.1093	283.803	195.952		1000000812	33.4989	179.323	-1104.19		1000000541	138.712	69.9479	-560.685		1000000225	246.752	161.559	-287.28
1000020503	10.3254	283.655	197.508		1000000812	33.8556	179.766	-1104		1000000541	138.859	69.6441	-558.43		1000000225	246.224	162.058	-287.375
1000020503	11.0683	283.201	197.004		1000000812	33.3154	179.386	-1103.47		1000000541	138.818	71.0886	-558.677		1000000225	247.309	160.459	-287.421
1000020503	9.79919	283.743	195.907		1000000812	32.9922	179.512	-1104.35		1000000541	139.1	75.445	-557.136		1000000225	247.138	161.722	-287.259
1000020503	11.4249	282.548	196.91		1000000812	33.1914	179.706	-1105.42		1000000541	139.737	75.9991	-557.756		1000000225	246.753	162.908	-286.836
1000020503	11.028	282.716	196.261		1000000812	31.7675	180.576	-1104.79		1000000541	138.902	75.9222	-557.139		1000000225	246.539	162.728	-287.048
1000020503	11.1992	283.623	200.114		1000000812	31.6518	181.439	-1107.53		1000000541	139.989	77.4305	-561.756		1000000225	246.046	165.144	-287.496
1000020503	11.2804	282.569	196.901		1000000812	32.3067	180.894	-1105.29		1000000541	140.441	77.3436	-561.433		1000000225	246.021	164.955	-287.449
1000020503	11.2104	281.448	192.4		1000000812	31.9753	181.404	-1105.61		1000000541	144.315	79.8454	-556.982		1000000225	246.617	163.2	-287.915
1000020503	11.1059	281.89	196.008		1000000812	32.0797	181.54	-1105.16		1000000541	144.893	81.275	-556.726		1000000225	246.38	161.159	-288.541
1000020503	10.8965	281.708	198.042		1000000812	32.4849	181.09	-1105.82		1000000541	144.822	81.0501	-554.383		1000000225	245.871	159.88	-287.787
1000020503	12.5938	282.297	201.546		1000000812	33.1041	179.952	-1104.85		1000000541	145.096	83.5309	-555.183		1000000225	245.781	159.928	-287.597
1000020503	11.8039	282.069	197.444		1000000812	33.8107	179.09	-1103.39		1000000541	144.638	84.465	-556.911		1000000225	246.286	159.85	-287.849
1000020503	11.4319	282.134	196.204		1000000812	34.5171	179.786	-1105.03		1000000541	144.733	84.5003	-560.674		1000000225	246.932	159.895	-288.738
1000020503	12.0701	281.667	192.4		1000000812	34.9541	178.735	-1104.92		1000000541	144.948	83.2656	-559.129		1000000225	246.809	159.618	-287.722
1000020503	11.4878	280.884	192.4		1000000812	34.693	179.418	-1104.65		1000000541	145.556	83.6288	-558.36		1000000225	246.884	160.119	-287.815
1000020503	11.3584	281.863	196.85		1000000812	34.7131	179.141	-1104.35		1000000541	147.677	82.7627	-556.781		1000000225	246.425	159.34	-287.239
1000020503	11.513	282.074	197.035		1000000812	34.9865	179.04	-1105.24		1000000541	147.007	82.7984	-557.762		1000000225	246.66	159.162	-287.151
1000020503	11.0778	282.642	197.255		1000000812	34.4218	179.259	-1105.13		1000000541	149.353	83.1123	-558.051		1000000225	246.741	159.248	-292.21
1000020503	10.0122	279.545	192.4		1000000812	33.9826	179.32	-1106.65		1000000541	150.196	83.2814	-560.037		1000000225	246.63	159.609	-287.628
1000020503	10.4759	281.654	199.001		1000000812	33.8276	178.699	-1105.91		1000000541	151.268	82.3676	-558.289		1000000225	246.585	159.327	-287.565
1000020503	7.52712	276.621	199.427		1000000812	33.048	178.596	-1105.78		1000000541	152.552	82.5998	-560.45		1000000225	246.364	158.969	-288.249
1000020503	7.80059	278.052	200.88		1000000812	33.1031	179.294	-1105.95		1000000541	153.797	82.6099	-560.455		1000000225	246.986	159.858	-288.923
1000020503	7.43768	276.768	192.4		1000000812	33.3647	178.041	-1105.79		1000000541	155.843	82.4722	-561.263		1000000225	248.305	160.128	-288.32
1000020503	7.49575	277.984	201.595		1000000812	33.367	178.899	-1106.2		1000000541	157.23	82.4517	-561.402		1000000225	248.366	160.313	-288.714
1000020503	8.00486	277.742	195.525		1000000812	31.8113	179.094	-1106.01		1000000541	157.839	82.823	-559.964		1000000225	247.542	159.934	-288.44
1000020503	8.10759	276.583	201.419		1000000812	31.4345	180.086	-1103.78		1000000541	160.287	84.034	-561.588		1000000225	247.343	160.249	-289.704
1000020503	8.23331	275.084	192.4		1000000812	31.3675	181.161	-1104.63		1000000541	161.551	84.9741	-564.117		1000000225	247.385	159.387	-292.21
1000020503	8.35497	276.069	199.058		1000000812	32.2004	180.228	-1104.02		1000000541	165.43	87.3928	-561.225		1000000225	246.707	159.555	-292.21
1000020503	8.03166	275.926	199.143		1000000812	31.3971	180.156	-1108.78		1000000541	168.773	88.3705	-560.818		1000000225	246.444	159.548	-292.21
1000020503	7.02069	275.936	201.19		1000000812	31.7237	180.17	-1108.64		1000000675	9.45146	183.832	-561.216		1000000225	246.77	158.889	-292.21
1000020503	8.01672	276.35	198.713		1000000812	31.3431	179.277	-1108.33		1000000675	9.34545	184.231	-562.155		1000000225	246.537	158.577	-292.21
1000020503	7.05617	274.899	192.4		1000000812	31.8259	178.326	-1103.89		1000000675	9.38967	183.58	-562.523		1000000225	246.493	159.936	-289.335
1000020503	6.59898	273.595	198.508		1000000812	32.3028	178.503	-1103.76		1000000675	9.30969	183.365	-563.136		1000000225	247.53	158.615	-289.526
1000020503	5.90176	273.037	198.218		1000000812	32.5117	178.666	-1104.67		1000000675	9.26669	183.32	-562.736		1000000225	247.731	159.072	-289.603
1000020503	6.36279	271.848	198.207		1000000812	33.5556	178.541	-1105.05		1000000675	9.36463	182.794	-564.138		1000000225	247.537	158.802	-292.21
1000020503	6.52956	274.097	198.584		1000000812	32.2186	178.923	-1101.93		1000000675	9.29975	182.624	-563.342		1000000225	246.915	159.488	-288.675
1000020503	6.81532	274.352	198.499		1000000812	33.4917	179.493	-1105.62		1000000675	9.11567	183.361	-566.19		1000000225	246.66	159.249	-288.325
1000020503	6.65393	275.292	199.21		1000000812	33.5519	179.756	-1104.57		1000000675	9.21671	183.431	-565.76		1000000225	246.786	159.838	-288.186
1000020503	7.90467	277.8	202.627		1000000813	60.9182	175.192	-1115.94		1000000675	9.13614	183.322	-566.085		1000000225	246.617	157.697	-292.21
1000020503	9.37387	279.118	198.851		1000000813	60.3642	175.665	-1116.93		1000000675	8.91316	183.319	-565.841		1000000225	246.486	158.888	-289.21
1000020503	8.44281	279.773	199.542		1000000813	61.5251	175.604	-1118.72		1000000675	9.22115	183.729	-564.932		1000000225	246.29	159.166	-288.199
1000020503	8.34761	278.184	199.074		1000000813	61.3582	175.029	-1119.46		1000000675	8.79359	183.375	-566.034		1000000225	246.185	160.425	-287.354
1000020503	10.2141	281.777	198.654		1000000813	61.3417	173.931	-1119.94		1000000675	9.39175	183.324	-566.744		1000000225	246.71	161.356	-287.679
1000020503	10.0279	279.877	198.766		1000000813	61.4944	174.013	-1115.46		1000000675	9.4198	183.4	-565.046		1000000225	246.582	161.062	-288.136
1000020503	9.87753	282.807	198.283		1000000813	61.1134	174.443	-1116.36		1000000675	8.97603	183.843	-566.684		1000000225	246.38	161.102	-282.915
1000026163	115.8	195.011	204.232		1000000813	61.8584	174.904	-1118.4		1000000675	8.95787	184.445	-565.922		1000000225	249.165	160.235	-283.415
1000026163	115.592	194.894	203.227		1000000813	61.7612	174.353	-1119.47		1000000675	9.11405	184.406	-565.786		1000000225	249.411	160.44	-284.787
1000026163	115.755	194.528	203.156		1000000813	61.6937	174.884	-1119.91		1000000675	8.96946	183.606	-564.338		1000000225	248.64	160.429	-284.975
1000026163	114.53	194.249	204.388		1000000813	61.8801	175.015	-1121.21		1000000675	9.03734	184.124	-565.852		1000000225	249.023	159.783	-285.681
1000026163	113.802	193.49	203.179		1000000813	62.1715	174.525	-1120.84		1000000675	9.59245	184.418	-567.136		1000000225	249.675	160.341	-283.778
1000026163	114.996	193.631	202.926		1000000813	61.7641	173.86	-1120.13		1000000675	9.52567	184.028	-566.713		1000000225	249.194	160.768	-283.656
1000026163	114.771	193.83	203.459		1000000813	62.6561	174.599	-1119.62		1000000675	8.79842	184.265	-566.531		1000000225	247.644	159.921	-285.102
1000026163	116.083	193.922	203.812		1000000813	62.7551	174.335	-1119.83		1000000675	9.40353	184.397	-566.811		1000000225	247.527	159.558	-285.002
1000026163	114.977	192.677	206.515		1000000813	62.11	174.601	-1119.67		1000000675	9.01472	184.437	-566.886		1000000225	247.126	159.625	-285.613
1000026163	114.24	192.789	205.659		1000000813	61.7858	174.651	-1119.68		1000000675	9.07239	184.474	-565.542		1000000225	247.66	159.916	-286.076
1000026163	114.816	193.213	203.95		1000000813	61.5546	174.803	-1120.19		1000000675	9.04262	184.392	-566.199		1000000225	247.507	159.814	-285.201
1000026163	115.489	194.672	201.669		1000000813	61.6236	173.974	-1119.78		1000000675	8.95901	184.267	-567.068		1000000225	247.332	159.116	-285.098
1000026163	114.889	194.019	204.372		1000000813	61.6697	172.98	-1120.04		1000000675	9.24382	184.254	-566.948		1000000225	247.631	160.752	-283.552
1000026163	114.588	194.159	204.517		1000000813	61.2405	173.108	-1120.12		1000000675	8.7418	184.486	-566.417		1000000225	247.404	159.59	-285.178
1000026163	114.098	193.813	207.186		1000000813	61.5905	173.295	-1120.11		1000000675	8.83829	184.473	-567.164		1000000225	247.582	160.217	-285.965
1000026163	115.226	194.589	203.628		1000000813	62.2721	173.197	-1120.61		1000000675	8.4059	185.006	-567.581		1000000225	247.04	159.694	-285.663
1000026163	114.871	194.706	206.444		1000000813	62.2506	173.161	-1120.99		1000000675	8.60022	185.072	-567.277		1000000225	247.362	159.504	-285.409
1000026163	115.033	193.962	205.047		1000000813	61.8812	172.648	-1120.12		1000000675	8.97575	184.92	-566.305		1000000225	247.457	159.395	-286.015
1000026163	114.468	195.578	206.413		1000000813	62.6796	173.324	-1125.22		1000000675	8.55668	184.63	-567.15		1000000225	247.81	160.225	-285.884
1000026163	115.103	195.38	204.116		1000000813	61.9779	172.956	-1125.22		1000000675	8.23997	184.844	-567.69		1000000225	247.592	160.215	-285.827
1000026163	114.174	195.807	204.292		1000000813	62.9122	173.293	-1125.22		1000000675	8.38632	184.723	-567.69		1000000225	248.465	159.66	-285.766
1000026163	115.831	195.234	203.495		1000000813	62.4609	173	-1125.22		1000000675	8.09465	184.604	-567.212		1000000225	247.794	159.27	-285.814
1000026163	115.754	194.867	204.327		1000000813	62.4118	171.19	-1121.35		1000000675	8.90265	184.942	-567.112		1000000225	248.078	159.017	-285.735
1000026163	114.359	194.269	206.962		1000000813	62.8658	171.487	-1120.33		1000000675	8.92662	185.094	-566.602		1000000225	248.1	159.847	-286.191
1000026163	116.494	194.318	204.441		1000000813	62.2695	171.175	-1120.18		1000000675	8.41047	184.746	-565.859		1000000225	247.501	159.658	-286.472
1000026163	116.548	195.468	204.31		1000000813	61.6236	170.532	-1121.84		1000000675	8.17836	184.394	-567.157		1000000225	247.478	159.454	-286.645
1000026163	117.081	195.398	203.931		1000000813	61.5183	170.437	-1120.8		1000000675	8.52039	184.765	-567.894		1000000225	246.691	159.489	-286.537
1000026163	114.616	194.966	206.502		1000000813	61.3227	170.484	-1121.38		1000000675	8.74566	184.823	-568.072		1000000225	246.677	158.957	-286.568
1000026163	116.048	194.96	203.245		1000000813	61.9785	170.529	-1120.75		1000000675	8.61301	184.766	-567.441		1000000225	247.365	158.773	-286.274
1000026163	116.01	194.51	203.428		1000000813	62.2692	170.788	-1119.57		1000000675	8.17589	185.105	-567.121		1000000225	246.356	160.336	-285.883
1000026163	116.176	193.073	203.584		1000000813	62.1558	170.528	-1120.12		1000000675	8.87658	185.147	-567.167		1000000225	247.126	159.723	-286.507
1000026163	116.956	195.103	203.203		1000000813	61.9236	170.293	-1120.5		1000000675	8.33273	185.028	-566.556		1000000225	246.925	160.002	-286.105
1000026163	116.015	193.48	203.147		1000000813	62.1439	170.403	-1119.94		1000000675	8.4135	184.404	-565.627		1000000225	246.382	159.954	-286.102
1000026163	116.663	193.377	203.755		1000000813	61.5757	169.681	-1121.26		1000000675	8.53436	184.905	-566.097		1000000225	246.369	159.14	-286.145
1000026163	116.842	194.467	201.791		1000000813	62.4568	170.432	-1125.22		1000000675	8.16009	184.944	-567.001		1000000225	246.673	159.413	-286.541
1000026163	115.332	193.122	206.781		1000000813	61.9618	170.115	-1116.49		1000000675	8.96816	184.737	-567.903		1000000225	245.747	160.526	-286.125
1000026163	116.647	193.988	202.835		1000000813	62.1286	170.436	-1121.07		1000000675	8.97042	184.996	-567.281		1000000225	246.119	160.623	-286.39
1000026163	117.189	194.522	203.517		1000000813	61.6721	171.64	-1115.74		1000000675	8.49468	184.895	-567.193		1000000225	246.414	160.843	-286.122
1000026163	117.442	194.062	203.275		1000000823	19.0281	213.345	-1111.17		1000000675	8.6493	185.405	-566.897		1000000225	246.502	159.942	-286.423
1000026163	117.009	193.532	203.853		1000000823	21.2684	213.228	-1113.97		1000000675	8.57421	185.367	-566.299		1000000225	247.021	160.091	-286.439
1000026163	117.11	193.635	204.389		1000000823	19.6299	213.994	-1114.46		1000000675	8.34494	185.75	-566.305		1000000225	245.961	160.188	-286.225
1000026163	116.821	194.07	203.991		1000000823	19.715	212.759	-1115.08		1000000675	8.51949	185.231	-566.424		1000000225	245.885	158.99	-286.109
1000026163	116.916	193.35	203.057		1000000823	18.8373	212.002	-1114.87		1000000675	8.28111	185.548	-567.339		1000000225	246.192	159.777	-285.582
1000026163	117.998	194.404	202.696		1000000823	20.6662	211.362	-1114.73		1000000675	8.7911	185.343	-567.162		1000000225	246.706	160.281	-286.076
1000026163	116.894	194.238	201.137		1000000823	19.8124	211.945	-1114.12		1000000675	8.49373	185.354	-567.084		1000000225	245.574	159.902	-286.103
1000026163	116.474	193.789	201.699		1000000823	18.4514	212.601	-1114.78		1000000675	8.2114	185.488	-566.606		1000000225	246.119	160.432	-286.492
1000026163	116.179	194.352	202.768		1000000823	18.5616	211.696	-1114.81		1000000675	8.2657	185.583	-566.191		1000000225	245.975	160.198	-286.134
1000026163	117.059	194.934	203.431		1000000823	18.6446	212.293	-1115.28		1000000675	8.09422	185.803	-564.96		1000000225	245.678	160.781	-286.142
1000026163	117.024	194.569	201.647		1000000823	18.1846	212.551	-1115.3		1000000675	8.29561	185.878	-565.379		1000000225	245.215	160.224	-286.285
1000026163	117.477	194.101	203.558		1000000823	18.4526	212.762	-1116.23		1000000675	8.12	185.787	-566.591		1000000225	245.424	159.755	-285.581
1000026163	117.319	194.052	203.259		1000000823	18.8777	211.757	-1116.41		1000000675	7.56637	186.093	-566.758		1000000225	245.032	159.898	-286.027
1000026163	116.653	193.773	200.618		1000000823	19.4048	211.474	-1116.19		1000000675	8.1445	185.267	-563.349		1000000225	244.869	159.767	-285.968
1000026163	117.485	193.375	203.695		1000000823	19.2297	212.201	-1115.39		1000000675	8.14553	185.611	-566.991		1000000225	245.65	159.946	-286.498
1000026163	117.567	194.21	200.301		1000000823	18.2553	211.683	-1114.41		1000000675	8.05461	186.133	-565.886		1000000225	245.433	160.859	-286.108
1000026163	117.959	194.275	201.322		1000000823	18.1772	211.826	-1115.64		1000000675	8.83185	185.99	-562.833		1000000225	244.866	160.406	-286.096
1000026163	117.538	192.889	203.131		1000000823	18.1848	212.337	-1115.89		1000000675	8.87911	185.763	-562.759		1000000225	244.873	159.913	-285.962
1000026163	117.728	194.328	202.304		1000000823	18.5984	212.348	-1116.41		1000000675	8.5801	185.932	-563.124		1000000225	244.6	160.312	-285.661
1000026163	118.724	194.129	201.51		1000000823	17.8176	211.025	-1116.66		1000000675	8.13785	185.451	-565.042		1000000225	243.981	160.508	-285.763
1000026163	118.615	193.572	201.416		1000000823	18.1851	211.267	-1119.51		1000000675	8.54953	185.625	-562.334		1000000225	244.363	160.467	-285.253
1000026163	117.629	193.228	202.015		1000000823	17.4394	211.351	-1118.31		1000000675	8.92365	185.391	-563.065		1000000225	244.336	160.975	-286.058
1000026163	117.809	193.691	202.082		1000000823	17.6704	211.191	-1117.38		1000000675	7.67507	185.683	-566.056		1000000225	244.288	161.294	-284.057
1000026163	118.54	193.077	201.241		1000000823	19.0713	211.381	-1118.71		1000000675	8.85551	186.114	-562.554		1000000225	244.707	161.23	-286.057
1000026163	117.783	193.274	201.219		1000000823	17.8511	212.264	-1115.79		1000000675	9.0953	185.741	-562.358		1000000225	244.109	160.422	-285.595
1000026163	117.941	193.32	200.567		1000000823	18.9783	211.925	-1119.27		1000000675	8.36592	186.22	-562.228		1000000225	244.375	160.829	-285.458
1000026163	119.29	192.614	204.167		1000000823	18.271	211.332	-1120.03		1000000675	9.12776	185.812	-562.094		1000000225	244.597	161.494	-286.345
1000026163	118.057	193.096	201.541		1000000823	18.7224	212.168	-1119.82		1000000675	8.46257	185.66	-562.306		1000000225	243.469	161.497	-286.293
1000026163	118.073	193.089	201.637		1000000823	17.3308	210.802	-1119.17		1000000675	8.10254	185.615	-562.942		1000000225	244.039	161.594	-285.563
1000026163	117.243	193.52	202.571		1000000823	18.1663	211.116	-1119.66		1000000675	8.84169	185.467	-562.552		1000000225	243.758	161.351	-285.806
1000026163	118.606	193.102	202.105		1000000823	18.4789	211.244	-1118.9		1000000675	9.08396	185.678	-562.933		1000000225	243.76	160.942	-286.211
1000026163	118.232	192.512	200.812		1000000823	18.2785	211.499	-1119.1		1000000675	8.84518	185.721	-562.855		1000000225	243.779	161.238	-286.085
1000026163	117.631	193.175	201.289		1000000823	18.5671	211.336	-1118.95		1000000675	8.64862	186.363	-562.189		1000000225	243.683	161.825	-286.219
1000026163	118.188	192.824	202.879		1000000823	18.6017	211.981	-1119.04		1000000675	9.34037	185.248	-561.993		1000000225	243.907	161.554	-285.882
1000026163	117.649	193.178	201.051		1000000823	17.5936	211.889	-1121.54		1000000675	8.73495	185.995	-562.319		1000000225	243.52	161.12	-285.892
1000026163	117.361	192.543	202.175		1000000823	18.1671	211.997	-1119.73		1000000675	8.9359	185.6	-561.782		1000000225	242.786	161.349	-285.833
1000026163	118.011	192.488	200.291		1000000823	18.3237	211.703	-1119.29		1000000675	8.71089	185.826	-561.933		1000000225	242.516	161.58	-286.076
1000026163	118.099	192.226	201.028		1000000823	18.8764	210.814	-1119.76		1000000675	8.7063	185.488	-561.559		1000000225	243.61	160.822	-285.963
1000026163	118.845	192.7	201.182		1000000823	18.43	211.587	-1119.94		1000000675	8.8651	185.344	-561.754		1000000225	243.624	161.342	-286.158
1000026163	118.803	192.57	198.429		1000000823	18.7788	212.127	-1119.3		1000000675	10.1161	185.733	-559.003		1000000225	243.502	161.497	-286.11
1000026163	119.322	192.963	199.03		1000000823	18.1492	210.745	-1120.07		1000000675	9.39845	185.734	-558.157		1000000225	243.763	161.145	-285.814
1000026163	119.145	192.576	199.142		1000000823	19.288	211.783	-1125.22		1000000675	9.19961	185.526	-558.351		1000000225	243.188	161.847	-286.358
1000026163	119.018	192.572	202.683		1000000823	17.8387	210.962	-1116.41		1000000675	9.50271	185.099	-559.211		1000000225	243.521	161.499	-285.962
1000026163	117.996	192.489	202.744		1000000823	17.4242	210.585	-1119.86		1000000675	8.6536	185.047	-559.974		1000000226	179.27	220.91	-280.484
1000026163	117.658	192.878	201.568		1000000823	17.4982	210.945	-1114.79		1000000675	9.49476	185.106	-559.162		1000000226	179.5	222.422	-280.708
1000026163	119.133	191.918	201.046		1000000823	17.7022	210.82	-1121.47		1000000675	9.47385	185.207	-561.087		1000000226	179.001	222.168	-281.662
1000026163	118.595	192.442	199.353		1000000823	17.8138	211.031	-1121.22		1000000675	9.46665	185.176	-558.271		1000000226	179.704	222.026	-282.418
1000026163	119.16	192.194	201.756		1000000823	17.6039	211.505	-1115.99		1000000675	8.81211	185.91	-560.404		1000000226	179.223	220.888	-282.05
1000026163	118.623	191.927	204.581		1000000823	16.702	210.153	-1116.43		1000000675	8.73475	185.851	-560.708		1000000226	179.587	221.107	-282.505
1000026163	118.173	192.126	201.366		1000000823	17.2824	211.346	-1118.13		1000000675	8.67939	185.495	-560.377		1000000226	179.385	219.804	-281.946
1000026163	118.282	192.163	200.369		1000000823	17.054	211.362	-1116.95		1000000675	9.97501	184.893	-557.806		1000000226	179.352	221.324	-282.678
1000026163	118.714	191.957	204.657		1000000823	17.9714	211.048	-1117.45		1000000675	9.42162	185.094	-558.07		1000000226	179.221	220.493	-282.553
1000026163	118.755	192.073	201.823		1000000823	17.4276	211.493	-1116.42		1000000675	9.39537	185.081	-557.722		1000000226	179.571	220.319	-282.266
1000026163	118.064	191.985	202.112		1000000823	18.4262	211.401	-1116.93		1000000675	9.48251	184.958	-558.703		1000000226	179.799	221.012	-283.292
1000026163	117.826	192.449	202.615		1000000823	17.5348	210.651	-1115.9		1000000675	8.37069	185.482	-561.092		1000000226	178.974	220.373	-284.232
1000026163	118.286	192.183	201.208		1000000823	17.9679	210.64	-1118.62		1000000675	9.02039	185.687	-558.946		1000000226	178.968	220.718	-283.24
1000026163	118.343	191.517	200.761		1000000823	17.6081	210.418	-1118.56		1000000675	8.47845	186.124	-559.929		1000000226	178.632	220.699	-281.804
1000026163	117.899	191.909	201.656		1000000825	61.0155	192.335	-1104.98		1000000675	8.8048	185.396	-557.48		1000000226	178.983	220.38	-281.991
1000026163	118.544	192.394	203.865		1000000825	60.7742	192.917	-1107.81		1000000675	8.88832	185.731	-557.072		1000000226	178.666	219.804	-282.211
1000026163	118.277	191.875	200.947		1000000825	60.7418	192.51	-1105.81		1000000675	8.53968	184.964	-557.299		1000000226	178.573	219.783	-282.095
1000026163	118.487	191.904	201.233		1000000825	60.9539	191.669	-1106.08		1000000675	8.25632	185.383	-557.978		1000000226	178.856	219.6	-282.903
1000026163	118.147	191.749	202.165		1000000825	61.7489	191.377	-1105.35		1000000675	9.23372	185.521	-559.247		1000000226	178.644	218.686	-282.589
1000026163	118.571	191.786	198.562		1000000825	61.6756	191.218	-1105.23		1000000675	9.05547	185.136	-557.672		1000000226	178.32	218.966	-282.223
1000026163	118.5	192.37	199.303		1000000825	61.6107	191.745	-1105.66		1000000675	9.257	185.64	-557.162		1000000226	178.088	219.056	-281.143
1000026163	118.045	191.549	200.317		1000000825	61.2598	192.117	-1106.14		1000000675	8.24177	185.546	-557.721		1000000226	178.319	218.467	-280.959
1000026163	117.739	191.928	201.988		1000000825	61.0082	191.656	-1106.56		1000000675	9.40882	185.168	-557.313		1000000226	177.935	218.723	-280.348
1000026163	118.263	192.286	200.46		1000000825	61.3886	191.661	-1106.42		1000000675	9.19546	185.34	-557.428		1000000226	177.901	218.52	-280.831
1000026163	118.759	191.647	202.153		1000000825	61.0108	190.836	-1106.16		1000000675	9.26592	185.293	-557.915		1000000226	175.285	217.735	-278.122
1000026163	118.332	191.477	203.181		1000000825	61.5029	191.534	-1108.31		1000000675	8.79472	185.063	-558.276		1000000226	175.18	217.446	-278.08
1000026163	118.045	192.275	203.748		1000000825	60.5798	190.646	-1105.6		1000000675	9.11591	185.034	-557.417		1000000226	172.586	217.127	-277.395
1000026163	118.038	191.569	198.354		1000000825	60.9064	190.254	-1105.43		1000000675	8.80827	185.179	-557.035		1000000226	172.228	216.5	-276.752
1000026163	116.588	191.65	203.481		1000000825	60.7289	190.333	-1104.59		1000000675	8.9216	185.709	-557		1000000226	173.049	216.477	-276.848
1000026163	118.466	191.415	197.241		1000000825	60.2189	186.734	-1101.75		1000000675	8.79762	185.757	-556.994		1000000226	171.292	215.96	-276.91
1000026163	116.466	191.349	205.721		1000000825	60.5136	184.744	-1100.76		1000000675	9.23052	185.69	-557.087		1000000226	169.631	215.722	-276.618
1000026163	118.547	191.23	198.789		1000000825	61.5331	184.283	-1103.47		1000000675	9.49419	185.367	-557.542		1000000226	167.765	216.058	-275.385
1000026163	117.538	191.785	202.447		1000000825	62.0024	181.753	-1103.25		1000000675	9.71802	185.735	-558.083		1000000226	169.821	216.463	-275.796
1000026163	117.06	191.258	205.528		1000000825	61.7464	180.448	-1101.82		1000000675	9.45364	184.813	-557.066		1000000226	169.866	216.306	-276.297
1000026163	117.905	191.359	204.215		1000000825	62.3475	180.729	-1104.7		1000000675	9.74082	185.498	-557.011		1000000226	169.405	216.205	-277.271
1000026163	117.728	191.628	204.231		1000000825	61.6256	180.351	-1105.06		1000000675	9.44768	185.797	-556.585		1000000226	169.227	216.643	-277.213
1000026163	116.186	192.016	200.088		1000000825	62.619	180.233	-1104.58		1000000675	9.42552	185.715	-556.583		1000000226	166.917	215.319	-276.704
1000026163	117.891	191.279	203.104		1000000825	62.1689	181.12	-1104.34		1000000675	9.85912	185.634	-556.909		1000000226	167.059	216.55	-276.874
1000026163	117.776	191.406	202.561		1000000825	61.4466	181.727	-1104.84		1000000675	9.28726	185.522	-557.392		1000000226	165.89	216.421	-276.664
1000026163	117.752	191.177	203.585		1000000825	60.6159	182.257	-1105.41		1000000675	9.12199	185.396	-557.091		1000000226	165.534	217.077	-276.853
1000026163	117.945	190.997	202.232		1000000825	60.6741	180.961	-1106.92		1000000675	9.15032	185.729	-557.062		1000000226	165.423	218.124	-277.139
1000026163	117.969	191.853	201.909		1000000825	60.7196	182.171	-1104.56		1000000675	9.06053	184.617	-556.906		1000000226	164.573	218.254	-277.636
1000026163	116.665	192.006	202.806		1000000825	60.6068	182.467	-1104.73		1000000675	9.02578	185.074	-556.151		1000000226	164.67	217.811	-276.729
1000026163	119.053	191.533	201.887		1000000825	60.3257	181.743	-1105.09		1000000675	9.57199	185.737	-555.958		1000000226	163.868	218.325	-277.52
1000026163	118.791	191.406	201.323		1000000825	60.0085	182.033	-1103.22		1000000675	8.98098	185.822	-556.872		1000000226	163.974	218.083	-277.918
1000026163	117.015	191.449	203.121		1000000825	59.7544	181.541	-1106.15		1000000675	8.90498	184.692	-556.863		1000000226	164.24	218.059	-277.171
1000026163	117.858	191.379	202.821		1000000825	59.5837	182.254	-1106.23		1000000675	8.72481	184.911	-556.067		1000000226	163.96	218.114	-277.578
1000026163	117.746	191.986	201.198		1000000825	58.5984	183.166	-1109.06		1000000675	8.81555	184.759	-556.335		1000000226	164.655	217.701	-277.63
1000026163	118.057	192.036	200.645		1000000825	58.6641	182.309	-1109.64		1000000675	8.54081	185.199	-557.061		1000000226	165.188	217.36	-278.35
1000026163	117.802	191.787	202.553		1000000825	59.6636	182.481	-1111.41		1000000675	9.28736	184.909	-556.828		1000000226	165.62	218.747	-276.731
1000026163	117.749	192.618	202.378		1000000825	60.2533	182.389	-1111.51		1000000675	9.15738	184.763	-555.472		1000000226	165.007	218.911	-277.674
1000026163	117.633	191.548	201.043		1000000825	60.9211	181.925	-1113.62		1000000675	9.2006	184.547	-553.547		1000000226	165.561	218.191	-277.815
1000029229	151.747	216.446	231.081		1000000825	60.5526	182.727	-1114.76		1000000675	9.04446	185.219	-555.771		1000000226	166.911	217.544	-280.246
1000029229	152.772	215.556	229.304		1000000825	60.3263	183.185	-1119.58		1000000675	8.276	185.253	-557.971		1000000226	168.154	217.423	-277.992
1000029229	152.069	214.604	224.369		1000000825	56.8988	183.144	-1119.87		1000000675	9.36821	185.196	-557.994		1000000226	170.457	217.126	-280.484
1000029229	150.75	215.097	226.343		1000000825	55.9162	183.138	-1120.4		1000000675	8.95898	184.837	-554.868		1000000226	169.595	217.194	-278.684
1000029229	151.294	214.293	226.855		1000000825	56.0152	183.306	-1115.53		1000000675	8.81028	184.91	-558.439		1000000226	170.362	215.727	-278.381
1000029229	150.937	213.237	226.324		1000000825	56.0314	183.803	-1121		1000000675	8.70888	184.987	-561.166		1000000226	172.104	215.189	-280.63
1000029229	151.204	213.231	228.451		1000000825	55.7177	184.193	-1114.49		1000000675	9.04163	185.711	-557.553		1000000226	172.093	215.253	-278.879
1000029229	148.584	212.729	231.396		1000000825	55.4395	184.199	-1120.58		1000000675	8.99036	185.124	-558.185		1000000226	173.319	215.493	-280.639
1000029229	149.85	213.591	230.273		1000000825	54.2567	184.338	-1120.92		1000000675	8.54372	184.767	-557.672		1000000226	172.187	214.56	-281.02
1000029229	149.371	214.583	230.881		1000000825	53.3594	185.168	-1114.86		1000000675	9.03331	185.842	-556.908		1000000226	173.655	215.757	-278.801
1000029229	151.393	214.874	225.245		1000000825	52.2798	184.782	-1114.76		1000000675	8.73868	184.211	-558.305		1000000226	172.247	214.583	-280.485
1000029229	150.774	214.534	228.58		1000000825	52.2453	185.008	-1115.9		1000000675	8.93593	185.065	-557.35		1000000226	174.358	215.533	-279.053
1000029229	150.373	214.364	228.664		1000000825	52.8057	185.14	-1116.05		1000000675	8.87018	185.099	-557.302		1000000226	170.679	214.055	-281.446
1000029229	149.914	212.127	228.737		1000000825	53.5751	184.955	-1115.18		1000000675	9.90403	185.192	-556.678		1000000226	169.646	212.786	-282.635
1000029229	149.166	213.858	232.515		1000000825	53.0804	185.077	-1114.76		1000000675	9.01741	183.781	-556.067		1000000226	167.688	213.651	-282.811
1000029229	150.956	214.319	229.669		1000000825	53.3438	184.855	-1115.24		1000000675	9.03167	184.58	-555.931		1000000226	169.033	212.37	-282.372
1000029229	149.014	214.141	231.468		1000000825	53.465	183.988	-1114.94		1000000675	9.02278	184.604	-554.42		1000000226	166.139	213.612	-282.484
1000030563	30.7497	190.085	237.193		1000000825	53.7054	185.354	-1116.19		1000000675	9.15491	185.118	-556.624		1000000226	165.105	213.341	-285.186
1000030563	30.3365	190.448	236.304		1000000825	54.9085	185.101	-1116.24		1000000675	8.32673	184.9	-556.559		1000000226	162.674	212.011	-283.666
1000030563	31.3191	190.235	234.213		1000000825	55.076	184.73	-1118.18		1000000675	9.01109	185.363	-556.623		1000000226	164.446	214.102	-284.974
1000030563	31.7723	190.199	232.285		1000000825	55.628	184.718	-1117.99		1000000675	9.09672	184.988	-555.222		1000000226	165.611	213.935	-283.24
1000030563	32.3539	189.662	232.421		1000000825	55.4684	184.869	-1114.55		1000000675	9.50561	185.884	-556.812		1000000226	162.798	214.242	-285.557
1000030563	33.2494	190.29	232.56		1000000825	54.5264	184.597	-1113.37		1000000675	9.83319	184.9	-557.535		1000000226	162.668	213.341	-286.984
1000030563	34.0661	191.293	231.149		1000000825	54.9625	185.579	-1110.93		1000000675	9.83123	185.042	-556.685		1000000226	160.848	214.265	-283.916
1000030563	37.0009	192.088	229.535		1000000825	56.7361	185.646	-1113.95		1000000675	9.5068	185.645	-557.162		1000000226	160.103	213.532	-285.185
1000030563	38.2014	192.679	228.349		1000000825	59.1714	183.667	-1114.85		1000000675	8.8855	184.798	-556.198		1000000226	159.196	213.701	-284.265
1000030563	41.7228	193.703	223.717		1000000825	59.3918	182.435	-1115.33		1000000675	8.95412	184.837	-556.523		1000000226	158.079	213.056	-283.215
1000030563	43.1858	195.618	224.12		1000000856	56.9555	198.254	-1085.39		1000000675	8.82342	184.436	-554.929		1000000226	158.356	213.875	-285.707
1000030563	44.0786	193.821	222.872		1000000856	56.8406	199.047	-1085.41		1000000675	9.48881	184.343	-555.997		1000000226	159.153	214.701	-285.731
1000030563	44.8025	192.688	223.283		1000000856	55.5438	199.531	-1085.66		1000000675	9.83529	184.324	-553.013		1000000226	158.539	214.342	-286.154
1000030563	45.224	191.001	222.206		1000000856	56.4582	199.722	-1084.33		1000000675	9.27629	184.832	-553.449		1000000226	158.744	214.564	-286.481
1000030563	45.0139	189.757	222.003		1000000856	56.9276	198.629	-1085.48		1000000675	9.09087	184.152	-553.389		1000000226	157.843	214.389	-286.221
1000030563	45.0045	189.217	222.285		1000000856	57.2208	199.379	-1086.12		1000000675	8.80522	184.001	-552.447		1000000226	159.03	214.942	-285.865
1000030563	45.8868	189.336	221.635		1000000856	56.5364	199.77	-1085.54		1000000675	9.05458	184.441	-553.348		1000000226	158.449	214.055	-287.24
1000030563	49.2177	188.163	225.962		1000000856	56.1878	201.362	-1084.8		1000000675	8.96692	185.308	-555.31		1000000226	158.612	214.437	-282.014
1000030563	49.753	187.25	227.073		1000000856	56.4234	201.209	-1084.31		1000000675	8.66135	184.8	-553.358		1000000226	159.85	214.423	-282.298
1000030563	49.3364	189.155	230.877		1000000856	56.3301	200.836	-1086.67		1000000675	9.62868	184.797	-552.648		1000000226	159.146	215.438	-283.459
1000030563	48.9115	190.772	231.717		1000000856	55.6429	200.84	-1085.28		1000000675	9.63917	184.694	-551.636		1000000226	159.831	214.371	-283.147
1000030563	48.7627	190.256	231.43		1000000856	56.438	201.225	-1085.23		1000000675	9.75463	184.803	-552.49		1000000226	158.816	214.281	-282.064
1000030563	48.7273	190.79	232.851		1000000856	56.3417	200.901	-1086.01		1000000703	49.3976	272.365	-558.672		1000000226	159.553	213.45	-281.366
1000030563	49.1519	191.171	232.43		1000000856	57.6366	199.48	-1089.39		1000000703	50.5913	271.917	-561.605		1000000226	159.043	215.028	-281.569
1000030563	49.3964	190.029	232.853		1000000856	56.9243	199.939	-1088.26		1000000703	50.1966	272.317	-561.984		1000000226	159.461	214.184	-282.219
1000030563	49.1805	190.278	232.787		1000000856	56.6588	201.741	-1084.72		1000000703	51.0996	271.65	-562.052		1000000226	161.311	213.357	-281.508
1000030563	50.1241	189.007	231.49		1000000856	55.2871	202.492	-1085.09		1000000703	51.4414	271.427	-562.289		1000000226	161.237	212.933	-281.866
1000030563	50.1398	188.606	234.57		1000000856	57.0438	201.722	-1088.09		1000000703	50.8275	271.041	-565.267		1000000226	162.595	212.161	-281.168
1000030563	50.4201	188.784	231.455		1000000856	56.0255	202.085	-1086.25		1000000703	51.4033	271.252	-566.242		1000000226	161.205	213.001	-281.44
1000030563	49.76	187.523	232.778		1000000856	56.4512	202.364	-1086.54		1000000703	49.4829	270.694	-565.951		1000000226	161.993	212.114	-280.17
1000030563	49.992	188.303	232.626		1000000856	56.7233	203.479	-1086.17		1000000703	50.2612	271.345	-565.734		1000000226	161.789	212.843	-281.654
1000030563	48.3082	188.004	232.565		1000000856	55.458	203.576	-1085.34		1000000703	50.9403	271.369	-566.853		1000000226	161.11	213.674	-281.568
1000030563	48.8424	187.806	231.295		1000000856	55.8969	202.566	-1086.7		1000000703	49.9303	271.391	-565.529		1000000226	161.604	211.706	-280.348
1000030563	48.7663	188.151	231.311		1000000856	56.8753	202.753	-1088.56		1000000703	48.1889	270.37	-565.832		1000000226	161.302	212.669	-281.192
1000030563	49.5226	186.888	228.004		1000000856	56.2614	200.889	-1089.7		1000000703	50.1387	271.581	-566.962		1000000226	162.256	211.546	-282.081
1000030563	47.7455	188.002	231.359		1000000856	56.4821	201.62	-1090.08		1000000703	49.1978	271.608	-567.057		1000000226	161.935	212.656	-280.568
1000035729	140.432	119.019	236.13		1000000885	127.867	191.121	-1125.22		1000000703	49.6118	271.689	-565.607		1000000226	160.466	211.849	-281.231
1000035729	140.952	119.243	236.74		1000000885	126.161	190.704	-1125.22		1000000703	49.8632	272.093	-566.614		1000000226	160.141	209.793	-280.309
1000035729	142.597	118.983	236.002		1000000885	127.921	191.417	-1125.22		1000000703	50.7339	272.949	-566.768		1000000226	161.085	211.071	-280.737
1000035729	140.951	119.335	236.406		1000000885	127.153	191.766	-1125.22		1000000703	51.1531	272.86	-566.791		1000000226	161.462	212.304	-281.681
1000035729	140.617	118.847	236.957		1000000885	126.621	189.432	-1125.22		1000000703	50.4911	272.934	-563.766		1000000226	162.065	211.467	-281.706
1000035729	141.207	119.468	236.69		1000000885	127.277	190.459	-1125.22		1000000703	50.7819	272.447	-567.941		1000000226	161.915	209.801	-281.354
1000035729	141.704	118.717	236.83		1000000885	127.737	191.579	-1125.22		1000000703	50.82	272.584	-567.928		1000000226	160.745	209.723	-280.644
1000035729	141.167	118.731	236.116		1000000885	127.587	191.843	-1125.22		1000000703	50.8986	272.509	-567.968		1000000226	161.235	210.933	-282.061
1000035729	139.961	118.411	236.459		1000000885	127.374	191.583	-1125.22		1000000703	50.739	272.677	-567.958		1000000226	162.262	208.466	-279.463
1000035729	139.079	118.18	236.179		1000000885	125.355	192.096	-1125.22		1000000703	51.3152	272.644	-567.978		1000000226	163.589	207.723	-281.508
1000035729	141.11	119.1	236.652		1000000885	126.487	192.555	-1125.22		1000000703	50.5867	273.316	-566.852		1000000226	164.385	206.114	-280.754
1000035729	139.336	119.086	236.96		1000000885	126.174	191.92	-1125.22		1000000703	50.8575	272.672	-565.047		1000000226	164.078	207.213	-280.187
1000035729	139.758	119.305	236.358		1000000885	126.823	191.422	-1125.22		1000000703	50.4388	272.677	-565.966		1000000226	165.857	204.488	-277.638
1000035729	140.021	119.369	236.721		1000000885	127.922	191.478	-1125.22		1000000703	49.3026	272.673	-566.797		1000000226	166.213	204.228	-278.429
1000035729	140.867	119.769	233.061		1000000885	126.992	192.379	-1125.22		1000000703	50.136	272.284	-567.011		1000000226	166.448	203.155	-277.981
1000035729	139.415	118.984	236.706		1000000885	127.636	190.543	-1125.22		1000000703	50.8834	272.359	-566.358		1000000226	166.425	200.986	-277.947
1000035729	138.246	118.747	236.846		1000000885	126.341	189.488	-1125.22		1000000703	50.5325	273.16	-566.739		1000000226	166.353	201.418	-277.01
1000035729	138.692	118.692	236.811		1000000885	126.457	189.822	-1125.22		1000000703	50.3724	273.344	-567.283		1000000226	166.593	201.603	-276.826
1000035729	138.056	119.609	236.774		1000000885	128.274	190.605	-1125.22		1000000703	50.1467	272.975	-566.819		1000000226	165.528	200.728	-277.101
1000035729	138.884	119.765	235.311		1000000885	128.086	189.158	-1125.22		1000000703	49.9412	273.309	-566.385		1000000226	165.202	200.755	-278.112
1000035729	137.425	119.433	236.584		1000000890	123.523	224.033	-1125.22		1000000703	49.3333	273.022	-566.345		1000000226	165.403	201.701	-277.968
1000035729	139.971	119.325	235.649		1000000890	124.827	224.389	-1125.22		1000000703	49.0502	272.413	-565.996		1000000226	165.676	201.475	-278.995
1000035729	137.558	119.452	236.272		1000000890	121.572	224.173	-1125.22		1000000703	48.8822	272.735	-566.24		1000000226	165.586	200.783	-277.864
1000035729	138.181	119.459	236.707		1000000890	120.519	222.946	-1125.22		1000000703	49.6004	272.708	-566.659		1000000226	165.32	201.396	-279.07
1000035729	139.114	119.578	233.843		1000000890	121.467	222.731	-1125.22		1000000703	50.3614	272.585	-566.565		1000000226	165.055	199.393	-277.564
1000035729	138.269	118.955	236.019		1000000890	121.932	222.508	-1125.22		1000000703	50.9207	272.801	-566.425		1000000226	164.45	199.781	-277.35
1000035729	136.493	119.882	236.169		1000000890	120.354	223.692	-1125.22		1000000703	50.7923	272.747	-566.208		1000000226	164.848	198.91	-277.287
1000035729	139.22	120.168	235.076		1000000890	121.379	222.832	-1125.22		1000000703	50.7852	273.089	-566.72		1000000226	165.148	199.854	-278.023
1000035729	137.263	119.131	233.811		1000000890	120.176	222.844	-1125.22		1000000703	50.2985	272.524	-567.271		1000000226	165.103	198.547	-278.856
1000035729	138.087	120.413	233.452		1000000890	120.272	223.29	-1125.22		1000000703	49.8159	272.909	-567.382		1000000226	164.862	198.717	-277.101
1000035729	139.757	119.409	234.075		1000000890	122.176	222.111	-1125.22		1000000703	48.4552	273.023	-566.908		1000000226	164.822	197.685	-276.761
1000035729	138.163	120.267	235.651		1000000890	121.177	222.903	-1125.22		1000000703	49.0485	272.827	-567.166		1000000226	165.662	197.571	-277.312
1000035729	137.857	119.662	236.666		1000000890	121.464	222.946	-1125.22		1000000703	49.4044	272.432	-566.968		1000000226	165.373	196.964	-275.875
1000040036	268.156	156.959	206.895		1000000890	121.881	223.551	-1125.22		1000000703	50.8406	272.506	-566.48		1000000226	164.888	196.7	-276.451
1000040036	269.363	157.185	206.789		1000000890	122.57	223.046	-1125.22		1000000703	49.2862	272.633	-564.434		1000000226	165.05	196.422	-276.44
1000040036	268.166	157.179	207.122		1000000890	121.633	223.851	-1125.22		1000000703	49.2448	272.448	-563.716		1000000226	165.814	197.667	-276.533
1000040036	269.522	159.86	203.623		1000000890	121.222	224.405	-1125.22		1000000703	49.3406	272.759	-565.997		1000000226	164.964	197.494	-274.33
1000040036	268.6	157.494	206.187		1000000890	121.966	225.351	-1125.22		1000000703	49.1001	272.803	-567.219		1000000226	164.825	197.14	-275.235
1000040036	268.994	158.878	206.165		1000000890	122.337	224.569	-1125.22		1000000703	49.6854	272.785	-567.633		1000000226	164.947	197.017	-275.91
1000040036	270.165	162.231	203.349		1000000890	122.662	224.457	-1125.22		1000000703	50.6723	272.447	-567.105		1000000226	164.135	196.819	-275.265
1000040036	270.442	162.917	202.476		1000000890	120.739	226.024	-1125.22		1000000703	50.9588	272.705	-566.88		1000000226	164.573	197.516	-272.563
1000040036	270.71	163.364	202.649		1000000890	120.607	226.445	-1125.22		1000000703	51.93	272.712	-566.274		1000000226	164.476	196.667	-274.137
1000040036	270.205	164.518	202.678		1000000890	119.552	226.381	-1125.22		1000000703	51.1205	272.932	-565.995		1000000226	163.843	195.34	-272.527
1000040036	270.43	163.718	201.943		1000000890	119.971	226.717	-1125.22		1000000703	51.0753	272.813	-566.541		1000000226	164.478	196.666	-273.552
1000040036	271.163	164.391	201.679		1000000895	146.107	201.065	-1121.45		1000000703	50.4556	273.092	-566.337		1000000226	164.173	195.542	-273.523
1000040036	271.695	164.688	201.611		1000000895	148.536	202.014	-1125.22		1000000703	49.2912	272.94	-566.925		1000000226	164.491	196.31	-272.753
1000040036	272.635	167.572	202.071		1000000895	149.536	203.447	-1125.22		1000000703	49.4913	272.594	-566.785		1000000242	186.549	200.062	-277.738
1000040036	273.277	168.224	198.949		1000000895	150.453	203.822	-1125.22		1000000703	50.4465	272.601	-566.482		1000000242	187.465	202.489	-281.053
1000040036	273.057	168.868	200.725		1000000895	150.491	203.415	-1125.22		1000000703	50.3988	272.737	-566.267		1000000242	187.597	202.314	-279.395
1000040036	275.236	170.89	198.984		1000000895	150.804	202.819	-1125.22		1000000703	50.5443	273.144	-565.488		1000000242	188.109	203.21	-278.806
1000040036	275.841	170.078	198.216		1000000895	150.459	203.525	-1125.22		1000000703	50.3426	272.958	-565.601		1000000242	187.972	202.871	-280.04
1000040036	275.278	170.9	198.158		1000000895	149.945	203.744	-1125.22		1000000703	49.9322	273.014	-566.481		1000000242	188.424	205.221	-281.326
1000040036	275.821	171.017	197.489		1000000895	148.886	203.589	-1125.22		1000000703	50.311	272.714	-566.872		1000000242	189.277	205.562	-281.722
1000040036	276.123	170.575	200.884		1000000895	148.902	203.274	-1125.22		1000000703	49.7004	272.981	-565.438		1000000242	190.379	205.971	-281.324
1000040036	276.085	171.011	198.077		1000000895	148.512	203.695	-1125.22		1000000703	50.5273	273.398	-566.588		1000000242	190.622	205.734	-280.521
1000040036	275.173	170.383	197.205		1000000895	149.691	203.508	-1125.22		1000000703	50.9425	273.37	-566.61		1000000242	191.378	206.093	-280.146
1000040036	275.841	171.713	197.571		1000000895	149.837	202.781	-1125.22		1000000703	51.2048	273.935	-565.156		1000000242	191.993	206.303	-280.283
1000040036	275.63	171.968	197.33		1000000895	150.318	201.472	-1125.22		1000000703	49.9082	273.867	-564.129		1000000242	191.682	205.841	-280.079
1000040036	282.11	171.832	198.099		1000000895	150.898	199.245	-1125.22		1000000703	50.6247	273.082	-563.958		1000000242	191.847	206.173	-278.18
1000040036	283.057	172.234	195.882		1000000895	150.965	200.038	-1125.22		1000000703	51.9346	273.232	-566.141		1000000242	192.165	205.243	-277.846
1000040036	283.335	171.11	197.851		1000000895	153.07	197.906	-1125.22		1000000703	50.5984	272.897	-564.873		1000000242	191.489	205.266	-277.312
1000040036	283.217	172.711	197.911		1000000895	154.034	197.142	-1125.22		1000000703	50.0723	272.545	-564.317		1000000242	191.956	205.083	-277.539
1000040036	283.782	172.003	199.238		1000000895	153.905	197.599	-1125.22		1000000703	50.7083	273.325	-567.062		1000000242	193.08	205.984	-276.795
1000040036	283.04	172.78	198.162		1000000895	154.53	196.124	-1125.22		1000000703	51.1675	273.138	-565.161		1000000242	192.983	205.996	-275.092
1000040036	283.258	172.842	198.575		1000000895	155.335	194.915	-1125.22		1000000703	50.9745	273.771	-563.878		1000000242	192.831	205.828	-275.361
1000040036	283.278	172.677	199.937		1000000895	155.562	195.149	-1125.22		1000000703	50.5547	273.672	-562.82		1000000242	193.907	206.239	-274.353
1000040036	283.079	173.052	198.37		1000000895	162.463	193.987	-1125.22		1000000703	50.227	273.761	-562.321		1000000242	193.113	206.483	-272.752
1000040036	282.549	172.837	197.358		1000000895	164.73	195.268	-1125.22		1000000703	49.7549	273.371	-562.744		1000000242	193.247	206.499	-272.837
1000040036	282.653	172.299	198.212		1000000895	166.125	196.052	-1125.22		1000000703	50.126	273.309	-565.546		1000000242	193.601	206.478	-270.714
1000040036	281.92	173.557	197.634		1000000895	166.419	197.388	-1125.22		1000000703	51.6384	273.444	-563.578		1000000242	194.589	207.029	-268.798
1000040036	281.916	173.536	197.798		1000000895	168.633	195.732	-1125.22		1000000703	50.774	273.411	-566.562		1000000242	194.203	207.833	-270.38
1000040036	283.11	173.032	196.988		1000000895	169.011	194.928	-1125.22		1000000703	50.8113	273.533	-565.107		1000000242	194.243	206.993	-270.521
1000040036	282.446	172.862	197.723		1000000895	169.323	195.215	-1125.22		1000000703	50.3519	274.415	-565.294		1000000242	194.346	209.749	-267.858
1000040036	282.486	172.854	197.807		1000000895	167.996	194.647	-1125.22		1000000703	50.3046	273.946	-562.502		1000000242	193.514	208.977	-267.672
1000040036	283.043	172.643	197.239		1000000895	168.044	194.362	-1125.22		1000000703	50.876	273.941	-563.415		1000000242	193.929	208.712	-267.687
1000040036	283.618	173.13	197.114		1000000895	167.59	194.566	-1125.22		1000000703	51.2856	274.02	-562.713		1000000242	194.319	209.939	-267.429
1000040036	283.27	173.64	196.499		1000000895	166.819	194.529	-1125.22		1000000703	50.8093	273.661	-562.558		1000000242	192.665	210.4	-267.23
1000040036	283.027	173.22	196.692		1000000895	166.944	195.121	-1125.22		1000000703	50.9522	273.501	-562.503		1000000242	192.689	211.447	-268.143
1000040036	283.549	172.797	196.974		1000000895	164.876	196.233	-1125.22		1000000703	50.8694	273.705	-562.671		1000000242	193.613	211.587	-267.99
1000040036	283.588	173.45	192.4		1000000895	166.566	197.236	-1125.22		1000000703	51.1499	273.833	-562.072		1000000242	191.09	211.548	-270.526
1000040036	283.152	173.919	192.4		1000000895	167.324	197.096	-1125.22		1000000703	50.8809	273.611	-562.087		1000000242	192.642	211.989	-271.758
1000040036	284.576	174.791	192.4		1000000895	165.079	196.82	-1121.68		1000000703	51.8827	273.659	-561.795		1000000242	190.772	212.998	-271.678
1000040036	282.694	173.185	198.16		1000000895	165.477	197.159	-1125.22		1000000703	50.9605	273.212	-562.076		1000000242	189.379	212.433	-272.261
1000040036	283.455	173.028	196.959		1000000895	164.546	197.525	-1125.22		1000000703	51.0358	273.179	-562.079		1000000242	187.611	213.572	-273.047
1000040036	283.054	173.112	196.88		1000000895	163.621	197.046	-1125.22		1000000703	51.4944	273.006	-562.304		1000000242	190.243	212.758	-273.161
1000040036	283.252	173.869	192.4		1000000895	162.519	196.552	-1125.22		1000000703	50.8706	273.784	-562.268		1000000260	204.158	338.282	-288.246
1000040036	282.708	173.191	196.567		1000000895	160.113	195.169	-1118.17		1000000703	51.1493	273.623	-561.966		1000000260	205.455	336.11	-292.21
1000040036	282.843	172.745	195.57		1000000895	159.142	193.65	-1125.22		1000000703	52.3707	274.309	-562.05		1000000260	205.281	335.906	-292.21
1000040036	282.542	173.253	197.257		1000000895	155.802	193.472	-1119.41		1000000703	51.5084	273.675	-561.996		1000000260	204.225	338.282	-292.21
1000040036	282.36	173.639	196.957		1000000895	152.98	193.427	-1125.22		1000000703	52.1797	273.59	-562.225		1000000260	204.844	337.449	-292.21
1000040036	282.348	173.469	197.024		1000000912	118.212	179.757	-1098.79		1000000703	52.5291	273.528	-561.969		1000000260	203.053	336.978	-292.21
1000040036	283.391	173.807	196.69		1000000912	118.324	180.856	-1095.29		1000000703	52.7784	273.38	-561.61		1000000260	204.068	334.497	-292.21
1000040036	283.349	172.679	197.234		1000000912	117.318	180.666	-1097.19		1000000703	52.4925	273.512	-561.744		1000000260	203.122	338.282	-292.21
1000040036	282.805	173.258	196.24		1000000912	118.702	179.902	-1102.9		1000000703	52.3167	273.798	-562.128		1000000260	201.936	338.282	-292.21
1000040036	282.738	173.797	195.903		1000000912	118.926	179.115	-1099.97		1000000703	51.7411	273.903	-562.061		1000000260	204.534	335.953	-292.21
1000040036	283.308	174.458	192.4		1000000912	119.366	179.828	-1099.03		1000000703	52.1363	274.081	-562.069		1000000260	204.145	338.282	-287.909
1000040036	282.796	174.156	197.141		1000000912	118.801	180.259	-1099.9		1000000703	52.2043	273.725	-561.828		1000000260	203.661	335.559	-292.21
1000040036	283.634	173.684	196.661		1000000912	118.841	180.817	-1098.91		1000000703	51.9222	273.488	-559.488		1000000260	203.055	338.282	-292.21
1000040036	281.699	173.578	197.072		1000000912	120.424	181.326	-1105.76		1000000703	52.6938	273.051	-559.048		1000000260	204.088	333.967	-292.21
1000040036	283.123	173.577	197.578		1000000912	119.616	182.052	-1106.11		1000000703	52.2474	273.889	-560.139		1000000260	205.619	334.498	-292.21
1000040036	284.157	173.587	192.4		1000000912	120.984	181.564	-1108.83		1000000703	52.2664	273.651	-561.645		1000000260	205.102	334.402	-292.21
1000040036	282.895	173.067	192.4		1000000912	120.778	182.047	-1109.81		1000000703	52.6725	273.782	-561.986		1000000260	204.253	338.282	-292.21
1000040036	283.175	173.879	192.4		1000000912	121.648	181.918	-1111.74		1000000703	51.5295	274.202	-561.536		1000000260	204.361	337.075	-292.21
1000040036	281.747	173.163	197.369		1000000912	122.915	181.674	-1110.16		1000000703	53.1657	274.078	-558.765		1000000260	205.222	336.892	-292.21
1000040036	282.245	173.432	197.879		1000000912	122.726	182.01	-1107.16		1000000703	52.3967	274.268	-559.142		1000000260	205.033	338.282	-292.21
1000040036	282.639	172.868	196.855		1000000912	123.932	180.83	-1110.94		1000000703	54.1876	274.173	-557.725		1000000260	204.464	336.515	-292.21
1000040036	282.089	173.192	196.477		1000000912	124.251	179.181	-1111.03		1000000703	52.2158	274.404	-559.03		1000000260	204.315	334.695	-292.21
1000040036	281.191	172.911	196.628		1000000912	123.78	178.24	-1109.86		1000000703	53.2943	274.485	-560.726		1000000260	204.457	335.126	-292.21
1000040036	282.883	173.17	197.128		1000000912	123.503	181.354	-1112.82		1000000703	53.0556	274.681	-561.7		1000000260	205.005	334.815	-292.21
1000040036	282.215	173.462	197.234		1000000912	123.843	182.312	-1113.34		1000000703	53.012	274.834	-559.059		1000000260	205.774	335.235	-292.21
1000040036	282.502	172.887	197.277		1000000912	124.781	184.468	-1118.59		1000000703	53.2373	275.144	-557.834		1000000260	205.766	335.212	-292.21
1000040036	280.554	172.496	196.183		1000000912	125.527	185.025	-1119.39		1000000703	53.8877	274.603	-557.319		1000000260	205.341	336.893	-292.21
1000040036	281.932	173.231	197.322		1000000912	126.408	186.019	-1118.74		1000000703	54.0646	274.06	-557.644		1000000260	205.982	334.802	-292.21
1000040036	282.659	172.619	196.815		1000000912	126.253	187.23	-1117.62		1000000703	53.9199	274.325	-558.763		1000000260	205.779	334.596	-292.21
1000040036	282.09	173.124	197.357		1000000912	127.402	189.179	-1119.26		1000000703	53.2145	274.282	-560.36		1000000260	205.707	334.899	-292.21
1000040036	280.713	172.888	196.607		1000000912	127.697	190.738	-1121.91		1000000703	53.9667	274.105	-561.519		1000000260	205.781	334.247	-292.21
1000040036	281.344	172.584	196.257		1000000912	127.498	195.619	-1122.29		1000000703	55.0741	274.038	-561.154		1000000260	205.592	334.929	-292.21
1000040036	282.176	173.097	195.176		1000000912	131.56	200.523	-1125.22		1000000703	53.8669	274.236	-557.957		1000000260	206.667	334.689	-292.21
1000040036	282.487	172.958	197.1		1000000912	134.023	201.794	-1125.22		1000000703	54.0764	274.442	-557.722		1000000260	205.556	335.255	-292.21
1000040036	281.642	172.643	200.472		1000000912	135.308	202.718	-1125.22		1000000703	54.847	274.119	-558.119		1000000260	205.676	334.686	-292.21
1000040036	281.463	172.531	192.4		1000000912	136.523	203.793	-1125.22		1000000703	53.927	274.117	-561.09		1000000260	205.445	335.409	-292.21
1000040036	280.806	172.795	192.4		1000000912	137.336	205.222	-1125.22		1000000703	55.4127	273.611	-561.923		1000000260	205.908	334.694	-292.21
1000040036	281.901	172.9	196.255		1000000912	139.134	212.069	-1125.22		1000000703	53.9583	274.454	-560.781		1000000260	206.685	335.384	-292.21
1000040036	283.235	172.905	192.4		1000000912	139.387	212.038	-1125.22		1000000703	53.5491	273.874	-561.216		1000000263	135.794	15.8246	-271.937
1000040036	281.681	172.619	192.4		1000000912	139.475	212.875	-1125.22		1000000703	53.6529	274.712	-558.727		1000000263	136.254	16.0743	-272.955
1000040036	281.025	172.856	196.949		1000000912	139.959	212.917	-1125.22		1000000703	53.0807	274.048	-560.563		1000000263	136.239	16.1306	-273.4
1000040036	281.879	172.569	197.242		1000000912	141.894	213.237	-1125.22		1000000703	54.3737	274.701	-558.31		1000000263	136.654	16.1177	-273.746
1000040036	281.672	173.153	197.256		1000000912	144.096	213.838	-1125.22		1000000703	53.8924	274.672	-558.949		1000000263	137.138	15.9367	-275.045
1000040036	281.434	173.077	198.684		1000000912	145.14	214.995	-1125.22		1000000703	53.8733	274.237	-557.79		1000000263	136.59	16.45	-274.253
1000040036	279.791	172.913	198.871		1000000912	148.117	216.294	-1125.22		1000000703	53.5093	274.023	-557.476		1000000263	136.754	16.2249	-275.599
1000040036	281.075	172.68	199.543		1000000912	149.299	218.74	-1125.22		1000000703	53.176	273.906	-557.909		1000000263	137.052	15.9689	-276.866
1000040036	280.443	173.334	192.4		1000000912	148.858	217.999	-1125.22		1000000703	54.0514	273.344	-559.661		1000000263	136.955	16.4827	-276.637
1000040036	280.815	172.997	199.536		1000000912	148.337	217.819	-1118.66		1000000703	54.6213	273.574	-558.624		1000000263	136.874	17.1471	-276.774
1000040036	282.028	172.486	195.813		1000000912	148.387	217.981	-1125.22		1000000703	55.1062	273.328	-559.619		1000000263	136.934	17.2219	-276.474
1000040036	280.105	173.081	199.355		1000000912	148.663	218.496	-1119.18		1000000703	54.746	273.303	-557.661		1000000263	136.709	17.2958	-276.606
1000040036	280.154	172.681	192.4		1000000912	150.819	220.476	-1125.22		1000000703	54.6885	273.166	-558.043		1000000263	137.103	17.099	-275.626
1000040036	280.246	172.273	197.836		1000000912	151.566	221.318	-1125.22		1000000703	54.8686	273.541	-562.716		1000000263	135.217	18.5699	-272.904
1000040036	281.755	173.085	199.229		1000000912	152.402	225.572	-1119.11		1000000703	55.9779	272.88	-563.045		1000000263	135.135	17.8445	-272.943
1000040036	281.938	173.007	199.342		1000000912	151.745	228.764	-1118.48		1000000703	56.1484	272.128	-558.223		1000000263	135.648	18.2506	-273.688
1000040036	281.718	173.148	198.631		1000000912	152.074	230.425	-1119.56		1000000703	55.1006	272.75	-562.952		1000000263	136.101	17.9214	-273.336
1000040036	281.686	173.201	192.4		1000000960	220.803	170.73	-1125.22		1000000703	55.5477	273.018	-562.563		1000000263	136.472	18.5832	-274.014
1000040036	281.605	172.641	200.558		1000000960	220.534	171.56	-1125.22		1000000703	54.8789	273.84	-562.11		1000000263	137.41	17.5877	-276.598
1000040036	281.27	172.498	198.285		1000000960	220.199	171.283	-1125.22		1000000703	55.1216	273.383	-562.559		1000000263	137.124	17.8162	-277.196
1000040036	281.736	172.78	199.189		1000000960	219.893	171.08	-1125.22		1000000703	54.457	273.292	-561.435		1000000263	136.87	17.692	-277.022
1000040036	282.177	172.699	198.341		1000000960	220.536	169.115	-1125.22		1000000703	54.4453	273.532	-561.595		1000000263	136.37	17.9939	-276.89
1000040036	280.853	173.239	198.088		1000000960	221.269	170.046	-1125.22		1000000703	55.1275	273.349	-562.114		1000000263	136.113	17.3404	-276.569
1000040036	280.244	172.487	198.307		1000000960	221.755	170.43	-1125.22		1000000703	54.2896	274.057	-562.139		1000000263	136.078	17.1827	-278.452
1000040036	281.084	172.238	198.401		1000000960	220.814	170.46	-1125.22		1000000703	53.9439	273.798	-562.384		1000000263	136.282	17.1999	-276.84
1000040036	280.118	171.978	198.027		1000000960	220.622	169.866	-1125.22		1000000703	54.5456	273.706	-561.905		1000000263	136.563	16.8861	-277.425
1000040036	280.904	172.548	198.22		1000000960	219.965	170.858	-1125.22		1000000703	53.2141	273.713	-562.07		1000000263	136.587	16.2969	-277.378
1000040036	280.76	172.457	197.9		1000000960	220.339	171.214	-1125.22		1000000703	54.4088	272.872	-559.879		1000000263	136.659	16.8617	-278.151
1000040036	281.292	171.956	198.273		1000000960	220.007	170.379	-1125.22		1000000703	54.46	273.725	-560.967		1000000263	136.464	16.059	-278.146
1000040036	280.364	172.837	198.361		1000000960	220.627	170.249	-1125.22		1000000703	53.7426	273.707	-561.709		1000000263	136.915	15.8287	-277.794
1000040036	279.116	171.788	198.717		1000000960	221.454	170.197	-1125.22		1000000703	53.4033	273.745	-562.333		1000000263	136.969	15.4137	-277.283
1000040036	280.281	172.089	198.971		1000000960	220.807	170.522	-1125.22		1000000703	54.7863	273.524	-562.504		1000000263	136.191	15.7234	-277.593
1000040036	279.902	172.204	198.834		1000000960	220.352	171.154	-1125.22		1000000703	53.2038	273.441	-561.458		1000000263	136.154	15.4625	-276.591
1000040036	281.934	173.031	198.51		1000000960	220.612	170.462	-1125.22		1000000703	55.3759	273.464	-560.513		1000000263	136.381	15.8274	-276.485
1000040036	282.174	172.577	198.688		1000000960	220.07	171.238	-1125.22		1000000703	54.5755	274.231	-562.867		1000000263	135.88	15.5341	-276.956
1000040036	279.687	172.124	198.486		1000000960	220.737	172.588	-1125.22		1000000703	54.3169	273.358	-562.439		1000000263	136.179	15.5093	-277.725
1000040036	280.163	171.534	198.21		1000000960	220.201	170.488	-1125.22		1000000703	53.9077	273.65	-562.357		1000000263	136.4	15.5917	-277.655
1000040036	281.442	171.985	198.259		1000000960	219.479	170.051	-1125.22		1000000703	54.4073	273.267	-562.302		1000000263	136.155	14.8819	-278.44
1000040036	281.552	171.843	198.473		1000000960	219.124	169.719	-1125.22		1000000703	54.1916	273.781	-562.201		1000000263	136.132	15.0683	-277.802
1000040036	280.919	173.208	197.825		1000000960	219.686	169.156	-1125.22		1000000703	52.7565	273.562	-561.445		1000000263	136.06	15.1608	-277.694
1000040036	281.131	172.092	198.039		1000000960	219.048	171.005	-1125.22		1000000703	53.7373	273.061	-560.24		1000000263	135.832	14.3864	-277.153
1000040036	280.484	172.488	198.577		1000000960	219.509	170.686	-1125.22		1000000703	54.0076	272.924	-561.535		1000000263	135.529	14.7196	-277.206
1000040036	280.409	172.372	198.868		1000000960	219.112	170.984	-1125.22		1000000703	53.062	273.432	-558.813		1000000263	135.528	14.522	-278.278
1000040036	279.884	173.065	198.276		1000000960	218.767	171.49	-1125.22		1000000703	53.1459	272.706	-560.17		1000000263	135.703	14.5154	-279.166
1000040036	278.951	171.723	198.387		1000000960	219.273	172.027	-1125.22		1000000703	53.7534	273.003	-558.014		1000000263	136.057	14.9318	-280.47
1000040036	281.771	172.857	198.61		1000000960	219.473	171.924	-1125.22		1000000703	53.6262	273.757	-558.558		1000000263	136.038	13.9156	-281.08
1000044301	160.029	253.431	196.125		1000000960	219.019	170.803	-1125.22		1000000703	54.2603	273.954	-559.097		1000000263	136.833	14.5973	-281.02
1000044301	159.6	252.54	192.4		1000000960	219.241	170.368	-1125.22		1000000703	55.5971	273.889	-558.035		1000000263	135.736	13.5871	-278.98
1000044301	159.413	253.652	196.963		1000000960	218.48	170.696	-1125.22		1000000703	54.113	274.551	-560.494		1000000263	135.693	13.498	-278.904
1000044301	159.5	253.64	198.427		1000000960	218.037	170.627	-1125.22		1000000703	54.1987	273.985	-558.941		1000000263	135.529	12.9847	-278.252
1000044301	161.159	254.251	197.699		1000000960	217.819	171.487	-1125.22		1000000703	53.3735	274.261	-560.614		1000000263	135.426	13.8766	-278.431
1000044301	161.202	253.571	197.025		1000000960	218.056	172.088	-1125.22		1000000703	53.2101	274.47	-561.417		1000000263	136.455	13.7476	-278.813
1000044301	165.573	255.641	198.107		1000000960	217.968	171.499	-1125.22		1000000703	54.0366	273.865	-561.756		1000000263	136.938	13.8011	-280.634
1000044301	168.433	254.58	192.4		1000000960	218.639	170.668	-1125.22		1000000703	54.4103	273.971	-561.859		1000000263	135.938	13.2925	-278.196
1000044301	167.92	255.53	192.4		1000000960	218.885	170.748	-1125.22		1000000703	53.7903	273.346	-562.589		1000000263	136.034	13.5338	-278.619
1000044301	168.3	255.344	192.4		1000000960	217.479	170.684	-1125.22		1000000703	54.0103	272.937	-562.626		1000000263	135.71	13.2627	-278.204
1000044301	169	254.084	192.4		1000000960	218.479	171.011	-1125.22		1000000703	53.5816	273.038	-562.162		1000000263	136.119	12.943	-279.534
1000044301	169.303	255.061	192.4		1000000960	217.338	170.251	-1125.22		1000000703	54.2877	273.405	-562.298		1000000263	135.8	12.7311	-278.842
1000044301	169.137	254.074	192.4		1000000960	217.111	171.32	-1125.22		1000000703	54.1018	274.322	-562.457		1000000263	135.835	13.5148	-279.808
1000044301	168.424	255.139	192.4		1000000967	188.369	199.217	-1125.22		1000000703	56.2896	274.119	-562.301		1000000263	135.807	13.8702	-280.038
1000044301	168.425	254.777	192.4		1000000967	187.989	199.495	-1125.22		1000000703	55.3362	273.877	-562.645		1000000263	136.14	12.7525	-278.587
1000044301	168.742	254.564	192.4		1000000967	187.191	200.329	-1121.93		1000000715	55.6101	180.87	-553.408		1000000263	136.1	13.6291	-280.605
1000044301	168.601	254.273	192.4		1000000967	187.155	199.682	-1121.73		1000000715	57.7752	181.264	-555.406		1000000263	135.953	12.9242	-278.674
1000044301	168.757	254.93	192.4		1000000967	188.352	198.12	-1125.22		1000000715	56.6101	181.363	-556.275		1000000263	135.285	12.8248	-278.376
1000044301	168.107	255.127	192.4		1000000967	189.259	198.495	-1125.22		1000000715	56.0717	180.85	-555.51		1000000263	135.197	12.6343	-278.611
1000044301	167.44	254.757	192.4		1000000967	189.017	199.007	-1125.22		1000000715	57.7563	180.895	-556.076		1000000263	135.51	13.9287	-280.363
1000044301	167.917	255.06	192.4		1000000967	190.016	200.19	-1125.22		1000000715	57.416	180.228	-555.386		1000000263	136.408	13.8552	-281.349
1000044301	168.203	255.487	192.4		1000000967	189.105	198.755	-1125.22		1000000715	57.4172	179.886	-558.831		1000000263	136.253	14.0514	-281.056
1000044301	167.285	255.406	192.4		1000000967	189.405	199.736	-1125.22		1000000715	57.4758	180.321	-556.756		1000000263	136	13.4173	-280.864
1000044301	168.089	255.343	192.4		1000000967	189.038	199.56	-1125.22		1000000715	57.4542	179.879	-556.905		1000000263	136.07	13.2247	-281.194
1000044301	167.342	255.449	192.4		1000000967	188.271	199.197	-1125.22		1000000715	56.3946	179.825	-557.373		1000000263	136.216	13.3489	-280.679
1000044301	168.227	254.501	192.4		1000000967	188.614	198.157	-1125.22		1000000715	57.245	179.691	-556.738		1000000263	136.08	13.3294	-280.72
1000044301	168.864	255.101	192.4		1000000967	189.86	198.823	-1125.22		1000000715	57.1272	179.507	-557.439		1000000263	135.848	13.4098	-281.723
1000044301	168.673	254.302	192.4		1000000967	189.147	198.633	-1125.22		1000000715	57.2311	178.763	-560.633		1000000263	135.818	12.525	-281.473
1000044301	168.155	255.242	192.4		1000000967	189.146	198.832	-1125.22		1000000715	54.7532	179.898	-558.413		1000000263	135.786	13.0687	-281.669
1000044301	169.044	254.29	192.4		1000000967	189.003	198.568	-1125.22		1000000715	53.6489	178.896	-557.066		1000000263	135.564	13.0483	-281.969
1000044301	168.504	254.532	192.4		1000000967	188.233	199.817	-1125.22		1000000715	54.9056	178.507	-557.336		1000000263	135.734	12.1595	-281.758
1000044301	168.587	256.688	192.4		1000000967	188.075	199.306	-1125.22		1000000715	54.7246	179.261	-556.395		1000000263	136.107	13.1516	-281.328
1000044301	167.624	255.25	192.4		1000000967	189.309	198.57	-1125.22		1000000715	55.8039	179.343	-558.141		1000000263	136.241	13.2034	-280.766
1000044301	167.827	256.432	192.4		1000000967	187.752	198.538	-1125.22		1000000715	56.2493	178.794	-556.83		1000000263	135.402	12.6379	-280.313
1000044301	168.158	256.299	192.4		1000000967	187.527	198.744	-1125.22		1000000715	55.8741	178.551	-557.084		1000000263	136.212	12.9227	-280.468
1000044301	166.708	256.463	192.4		1000000967	187.749	198.596	-1125.22		1000000715	55.3878	178.926	-558.158		1000000263	135.776	13.5199	-281.203
1000044301	167.468	255.901	192.4		1000000967	188.318	198.944	-1125.22		1000000715	53.123	179.356	-557.159		1000000263	136.202	12.9719	-280.909
1000044301	167.638	255.687	192.4		1000000967	188.017	198.419	-1125.22		1000000715	49.2495	178.882	-554.072		1000000263	135.76	13.1131	-281.368
1000044301	167	256.197	192.4		1000000967	187.827	198.394	-1125.22		1000000715	49.4516	179.571	-553.801		1000000263	135.914	12.9512	-280.525
1000044301	167.68	256.967	192.4		1000000967	187.464	198.324	-1121.72		1000000715	47.1239	178.256	-555.736		1000000263	135.791	13.0831	-280.215
1000044301	167.412	257.156	192.4		1000000967	187.714	199.361	-1125.22		1000000715	45.9787	177.939	-553.013		1000000263	136.136	13.9046	-281.181
1000049825	140.372	203.194	197.687		1000000967	187.404	199.088	-1125.22		1000000715	45.6604	178.476	-552.18		1000000263	135.313	13.5516	-281.523
1000049825	142.289	201.678	197.277		1000000967	187.527	198.308	-1125.22		1000000715	44.3236	178.552	-552.316		1000000263	135.279	13.5018	-277.002
1000049825	141.161	203.461	197.89		1000000967	188.487	198.986	-1125.22		1000000715	44.3294	177.874	-552.42		1000000263	136.045	13.2282	-276.855
1000049825	141.153	202.549	197.045		1000000967	187.842	198.498	-1125.22		1000000715	44.1292	177.803	-552.209		1000000263	135.941	13.1769	-277.324
1000049825	139.574	203.947	197.623		1000000967	186.677	198.719	-1125.22		1000000715	43.673	177.781	-551.997		1000000263	135.683	13.0694	-277.108
1000049825	139.06	204.938	197.156		1000000967	187.615	199.214	-1125.22		1000000715	44.2718	177.262	-552.356		1000000263	135.664	13.0037	-277.291
1000049825	141.1	202.196	196.798		1000000974	185.131	244.983	-1125.22		1000000715	44.4402	177.529	-553.224		1000000263	135.776	12.8917	-277.049
1000049825	140.295	203.17	197.556		1000000974	184.22	246.21	-1125.22		1000000715	44.4992	177.477	-552.202		1000000263	136.165	13.944	-276.904
1000049825	140.92	203.644	197.469		1000000974	184.766	245.873	-1125.22		1000000715	44.4607	177.163	-551.486		1000000263	136.195	14.0616	-277.183
1000049825	138.926	203.971	197.671		1000000974	183.575	246.641	-1121.87		1000000715	44.8364	177.786	-550.998		1000000263	135.905	13.6557	-276.388
1000049825	140.147	202.677	197.233		1000000974	184.792	244.423	-1125.22		1000000715	45.0632	177.693	-552.698		1000000263	135.903	13.9634	-277.024
1000049825	139.509	205.363	192.4		1000000974	185.462	244.587	-1125.22		1000000715	44.9172	177.577	-554.191		1000000263	136.285	14.2355	-276.822
1000049825	139.492	204.023	197.096		1000000974	184.615	245.441	-1125.22		1000000715	45.6096	177.223	-552.576		1000000263	136.249	14.299	-276.809
1000049825	139.001	203.193	197.954		1000000974	184.835	245.471	-1125.22		1000000715	44.1695	176.925	-551.994		1000000263	136.339	13.9544	-276.632
1000049825	139.571	204.672	197.423		1000000974	184.251	244.979	-1125.22		1000000715	44.2356	176.799	-552.284		1000000263	136.425	14.4183	-277.084
1000049825	138.188	204.392	195.428		1000000974	183.852	245.927	-1125.22		1000000715	46.1151	176.55	-548.463		1000000263	135.74	14.1983	-277.082
1000049825	139.171	205.026	197.029		1000000974	183.606	246.266	-1125.22		1000000715	45.6133	176.965	-553.025		1000000263	136.126	14.0418	-277.156
1000060486	161.067	161.028	212.276		1000000974	182.924	246.152	-1125.22		1000000715	44.211	176.599	-553.459		1000000263	136.062	13.9096	-277.2
1000060486	161.655	161.764	211.38		1000000974	183.86	244.418	-1125.22		1000000715	45.1889	177.284	-552.897		1000000263	136.651	13.6773	-276.948
1000060486	162.456	160.266	209.579		1000000974	185.668	245.975	-1125.22		1000000715	45.1286	176.314	-556.047		1000000263	136.715	14.5085	-277.217
1000060486	162.527	160.873	208.321		1000000974	184.794	245.31	-1125.22		1000000715	44.8244	177.651	-553.173		1000000263	136.626	14.3284	-277.267
1000060486	162.069	160.496	208.594		1000000974	184.87	245.542	-1125.22		1000000724	84.3845	258.936	-549.812		1000000263	136.713	14.5033	-277.479
1000060486	162.234	160.204	208.912		1000000974	184.813	245.871	-1125.22		1000000724	84.2193	258.816	-549.008		1000000263	136.863	14.1824	-277.094
1000060486	162.302	161.05	207.802		1000000974	184.337	246.261	-1125.22		1000000724	83.8574	259.499	-552.281		1000000263	136.716	14.2898	-277.469
1000060486	161.819	160.573	207.63		1000000974	183.457	247.114	-1122.33		1000000724	83.6714	259.125	-551.18		1000000263	136.58	14.4965	-277.373
1000060486	161.448	160.682	208.629		1000000974	183.743	245.423	-1125.22		1000000724	83.8623	258.983	-552.115		1000000263	136.314	14.7219	-277.461
1000060486	161.416	161.555	209.225		1000000974	182.952	245.751	-1125.22		1000000724	82.636	259.571	-552.301		1000000263	136.212	13.914	-277.614
1000060486	160.424	160.839	207.911		1000000974	183.29	246.274	-1125.22		1000000724	83.1826	259.418	-551.973		1000000263	136.13	14.2432	-277.493
1000060486	160.244	161.406	207.952		1000000974	183.499	246.032	-1125.22		1000000724	83.9056	259.838	-553.733		1000000263	135.961	14.4832	-277.591
1000060486	160.217	160.208	207.649		1000000974	183.318	246.579	-1125.22		1000000724	84.0921	260.275	-552.003		1000000263	136.071	14.1746	-277.409
1000060486	160.297	160.404	208.204		1000000974	183.316	246.308	-1125.22		1000000724	83.7947	259.899	-553.665		1000000263	136.249	15.1829	-277.617
1000060486	160.142	160.233	208.982		1000000974	182.331	246.382	-1125.22		1000000724	83.4029	259.532	-553.55		1000000263	136.279	15.203	-277.469
1000060486	159.536	161.196	210.377		1000000974	183.018	245.508	-1125.22		1000000724	83.0259	260.356	-551.9		1000000263	136.364	15.1191	-277.692
1000060486	159.92	160.796	208.15		1000000974	182.146	246.173	-1125.22		1000000724	82.8198	260.195	-553.31		1000000263	136.212	14.6839	-277.719
1000060486	159.002	160.306	211.112		1000000974	182.348	246.102	-1125.22		1000000724	83.4804	259.91	-552.673		1000000263	135.971	14.4829	-277.113
1000060486	160.315	160.33	208.451		1000000974	182.907	246.121	-1125.22		1000000724	82.9334	260.716	-554.193		1000000263	136.326	14.1945	-277.538
1000060486	158.904	161.694	209.485		1000000974	183.649	245.608	-1125.22		1000000724	82.6847	260.553	-553.218		1000000263	136.399	13.972	-277.45
1000060486	158.902	160.8	209.058		1000000974	182.775	245.125	-1125.22		1000000724	83.259	259.972	-552.815		1000000263	135.545	14.2174	-277.213
1000060486	159.231	161.632	207.411		1000000974	183.432	245.772	-1125.22		1000000724	83.1717	260.739	-553.239		1000000263	135.737	14.7993	-277.1
1000060486	159.263	161.383	208.116		1000000974	182.875	247.007	-1125.22		1000000724	83.8088	259.963	-552.211		1000000263	135.802	14.5059	-277.387
1000060486	159.811	161.264	208.26		1000000974	182.241	247.038	-1125.22		1000000724	83.3663	259.893	-551.111		1000000263	135.754	14.4147	-277.644
1000060486	160.227	160.429	207.616		1000000974	182.412	245.763	-1125.22		1000000724	83.3003	259.378	-552.364		1000000263	136.293	14.305	-277.557
1000060486	159.92	160.779	207.832		1000000974	183.355	245.988	-1125.22		1000000724	83.252	259.74	-553.893		1000000263	135.902	14.4784	-277.304
1000060486	159.73	160.255	207.744		1000000974	183.308	245.774	-1125.22		1000000724	83.268	259.971	-551.988		1000000263	136.15	14.5129	-277.296
1000060486	159.871	160.64	208.906		1000000974	182.297	245.533	-1125.22		1000000724	84.1162	260.089	-551.051		1000000263	136.113	14.3124	-277.066
1000060486	159.576	161.194	206.777		1000000974	182.127	245.901	-1125.22		1000000724	83.118	260.164	-553.252		1000000263	136.374	14.5403	-276.953
1000060486	159.941	161.564	207.769		1000000974	183.161	245.706	-1125.22		1000000724	83.2642	260.315	-552.979		1000000263	135.494	14.4341	-277.26
1000060486	159.715	160.598	207.981		1000000974	183.068	246.247	-1125.22		1000000724	83.0287	260.178	-553.363		1000000263	135.73	14.7532	-277.179
1000060486	159.579	160.96	207.821		1000000974	182.039	246.023	-1118.35		1000000724	83.2222	259.713	-552.166		1000000263	136.126	15.0353	-277.178
1000060486	158.919	161.191	207.402		1000000974	182.119	245.561	-1125.22		1000000724	83.615	259.864	-554.833		1000000263	135.843	14.8322	-277.127
1000060486	159.432	161.425	207.169		1000000974	181.324	247.408	-1116.06		1000000724	83.1299	259.476	-554.289		1000000263	135.786	14.0646	-276.924
1000060486	159.314	161.411	207.465		1000000974	182.089	246.214	-1125.22		1000000724	82.9993	259.226	-553.561		1000000263	135.55	14.7232	-276.983
1000060486	159.541	161.234	207.21		1000000974	182.337	245.667	-1125.22		1000000724	83.0632	259.809	-553.474		1000000263	135.678	14.3711	-276.768
1000060486	159.713	161.253	207.591		1000000974	181.964	245.368	-1118.91		1000000724	82.9209	260.402	-553.474		1000000263	135.475	13.8869	-276.954
1000060486	158.927	161.028	206.746		1000000974	182.205	245.116	-1118.66		1000000724	83.5585	260.135	-553.513		1000000263	135.679	14.0973	-276.972
1000060486	159.509	161.396	207.98		1000000974	181.061	246.008	-1119.17		1000000724	83.3607	259.88	-552.454		1000000263	135.662	14.6298	-276.879
1000060486	159.429	160.341	208.503		1000000974	181.897	246.587	-1118.64		1000000724	82.8647	259.279	-553.445		1000000263	135.785	14.7247	-276.733
1000060486	159.373	161.37	207.626		1000000974	182.632	245.941	-1118.92		1000000724	83.0103	259.473	-554.589		1000000263	135.411	13.6552	-276.52
1000060486	158.759	161.227	207.598		1000000974	182.58	245.647	-1118.78		1000000724	81.9892	259.484	-557.011		1000000263	135.308	14.3841	-276.303
1000060486	158.749	161.221	207.507		1000000974	182.736	246.172	-1118.58		1000000724	82.8805	258.94	-555.247		1000000263	135.306	14.5675	-275.963
1000060486	159.618	161.484	208.105		1000000974	182.911	244.751	-1118.62		1000000724	83.3916	259.348	-555.043		1000000263	135.489	14.8945	-275.72
1000060486	159.104	160.704	207.967		1000000974	183.52	245.419	-1118.63		1000000724	82.9053	259.71	-553.062		1000000263	135.807	14.693	-276.2
1000060486	159.513	160.783	207.89		1000000974	183.093	244.518	-1118		1000000724	82.8186	259.191	-553.081		1000000263	135.677	14.3869	-275.022
1000060486	158.873	160.508	207.356		1000000974	183.057	246.551	-1118.96		1000000724	82.9425	259.895	-554.464		1000000263	135.91	14.833	-276.679
1000060486	159.512	160.86	207.42		1000000974	182.935	247.087	-1118.02		1000000724	82.4527	259.355	-556.155		1000000263	135.603	13.7594	-276.717
1000060486	159.46	161.024	207.481		1000000974	181.91	245.126	-1118.39		1000000724	82.5916	258.595	-555.63		1000000263	135.301	14.3139	-276.665
1000060486	159.08	160.84	207.545		1000000974	179.837	246.064	-1118.86		1000000724	82.7652	258.829	-556.645		1000000263	135.791	14.4422	-277.128
1000060486	158.931	160.385	206.277		1000000974	182.549	246.423	-1118.94		1000000724	83.2745	258.914	-556.035		1000000263	135.262	14.2243	-276.655
1000060486	160.08	160.576	207.925		1000000974	182.324	247.122	-1119.23		1000000724	82.7571	259.205	-555.504		1000000263	135.087	14.565	-277.098
1000060486	159.57	160.69	207.071		1000000974	180.488	245.826	-1118.55		1000000724	83.1449	260.312	-554.538		1000000263	135.238	14.442	-276.438
1000060486	159.502	160.706	207.31		1000000974	181.241	246.39	-1119.08		1000000724	83.2259	259.765	-555.901		1000000263	135.137	14.1344	-276.693
1000060486	159.036	160.669	207.276		1000000974	180.046	246.472	-1118.52		1000000724	82.3074	259.883	-555.192		1000000263	135.094	14.2876	-276.728
1000060486	159.48	160.642	208.127		1000000974	179.422	248.012	-1117.04		1000000724	82.4857	259.426	-555.97		1000000263	134.808	14.2454	-277.002
1000060486	159.723	160.763	207.513		1000000974	180.911	246.576	-1119.21		1000000724	82.7786	259.35	-555.138		1000000263	135.061	14.0059	-276.923
1000060486	159.148	160.565	207.897		1000000974	181.351	245.844	-1118.98		1000000724	82.5609	259.857	-557.28		1000000263	134.382	14.3854	-276.739
1000060486	159.415	160.56	207.407		1000000974	180.861	247.04	-1118.79		1000000724	82.5597	259.471	-557.21		1000000263	134.306	14.4565	-276.46
1000060486	158.838	160.933	207.598		1000001046	321.228	204.318	-1120.99		1000000724	82.9141	261.002	-553.074		1000000263	134.65	14.4654	-276.763
1000060486	159.466	160.757	208.259		1000001046	319.755	204.773	-1120.1		1000000724	81.7276	260.324	-555.314		1000000263	134.946	13.8829	-277.009
1000060486	158.972	160.695	207.9		1000001046	319.343	204.651	-1121.94		1000000724	83.0851	260.375	-553.192		1000000263	134.681	14.5882	-276.894
1000060486	159.042	160.344	207.507		1000001046	319.577	203.696	-1121.92		1000000724	82.3024	260.829	-553.692		1000000263	134.491	14.7194	-277.111
1000060486	158.93	160.79	207.15		1000001046	319.674	203.086	-1121.8		1000000724	81.7817	260.266	-556.675		1000000263	134.891	14.8672	-277.004
1000060486	159.545	160.729	207.861		1000001046	319.779	202.959	-1120.27		1000000724	81.1758	260.439	-556.899		1000000263	134.258	14.2996	-277.33
1000060486	159.413	160.032	207.678		1000001046	320.209	203.001	-1120.41		1000000724	81.6556	260.939	-556.755		1000000263	134.369	14.9041	-277.022
1000060486	159.16	160.468	207.818		1000001046	321.414	202.835	-1125.22		1000000724	82.4738	260.395	-556.704		1000000266	65.8596	39.3333	-272.564
1000060486	158.593	160.548	207.829		1000001046	319.605	202.762	-1120.45		1000000724	81.9259	260.749	-553.792		1000000266	65.5517	39.4389	-272.444
1000060486	158.944	160.491	207.669		1000001046	319.232	203.737	-1121.18		1000000724	82.7073	259.928	-552.997		1000000266	66.2023	39.3391	-272.507
1000060486	159.538	160.258	204.43		1000001046	320.512	202.27	-1125.22		1000000724	83.5268	259.338	-555.829		1000000266	66.281	39.4164	-273.321
1000060486	158.613	160.247	208.084		1000001046	320.507	202.891	-1125.22		1000000724	83.4843	260.002	-553.552		1000000266	66.2048	39.3718	-274.082
1000060486	159.517	159.874	209.276		1000001046	319.211	201.691	-1125.22		1000000724	83.4454	260.607	-555.089		1000000266	65.1105	39.9283	-272.85
1000060486	159.094	160.107	206.531		1000001046	320.794	201.881	-1125.22		1000000724	83.7681	259.946	-553.09		1000000266	65.2634	39.7206	-274.384
1000060486	158.883	160.426	207.131		1000001046	320.575	201.791	-1125.22		1000000724	83.6532	260.843	-553.228		1000000266	64.8434	38.9231	-275.803
1000060486	158.869	160.332	207.586		1000001046	319.697	203.445	-1121.55		1000000724	83.6822	261.221	-552.561		1000000266	64.7876	39.8054	-274.486
1000060486	158.629	160.35	206.177		1000001046	320.773	203.514	-1125.22		1000000724	84.0113	261.499	-552.098		1000000266	65.1172	39.6518	-274.962
1000060486	158.786	160.23	207.314		1000001046	319.714	203.415	-1125.22		1000000724	84.1756	262.604	-550.94		1000000266	65.3533	38.9716	-275.739
1000060486	158.765	160.118	207.149		1000001046	320.829	202.747	-1125.22		1000000724	84.3223	263.366	-552.169		1000000266	65.7251	39.108	-276.199
1000060486	158.956	159.932	207.254		1000001046	321.052	203.089	-1125.22		1000000724	84.3305	262.943	-551.318		1000000266	65.0419	39.8202	-275.994
1000060486	159.323	160.092	206.539		1000001046	320.529	202.474	-1125.22		1000000724	83.2002	262.335	-553.268		1000000266	64.6669	40.1599	-274.91
1000060486	159.372	160.278	208.602		1000001046	320.23	202.43	-1125.22		1000000724	83.8	263.724	-550.859		1000000266	64.9298	39.8522	-275.498
1000060486	159.735	159.951	208.897		1000001046	321.327	202.854	-1125.22		1000000724	84.2874	262.981	-554.498		1000000266	65.6428	39.8815	-273.272
1000060486	159.583	159.618	209.476		1000001046	321.042	202.51	-1125.22		1000000724	84.5453	262.858	-550.96		1000000266	65.961	39.1817	-273.258
1000060486	159.037	160.546	206.559		1000001046	321.036	203.366	-1125.22		1000000724	84.5513	262.538	-551.038		1000000266	65.9678	39.9772	-273.717
1000060486	158.702	160.388	211.994		1000001046	320.583	203.165	-1125.22		1000000724	84.478	262.829	-549.988		1000000266	63.2898	40.8137	-271.572
1000060486	158.3	160.208	207.298		1000001046	321.924	203.692	-1125.22		1000000724	84.6952	262.922	-550.323		1000000266	65.032	39.434	-276.242
1000060486	158.502	159.961	212.039		1000001046	321.777	203.384	-1125.22		1000000724	84.2044	262.677	-549.609		1000000266	65.0895	39.6563	-275.708
1000060486	158.569	160.371	207.522		1000001046	320.986	203.598	-1125.22		1000000724	85.5492	262.582	-548.588		1000000266	64.4103	39.7573	-276.196
1000060486	158.277	160.331	212.48		1000001046	321.133	202.773	-1125.22		1000000724	84.4835	262.498	-550.791		1000000266	65.0838	38.988	-275.845
1000060486	158.385	160.247	211.219		1000001046	321.426	202.312	-1125.22		1000000724	84.8057	262.482	-551.798		1000000266	65.1582	39.7333	-276.412
1000060486	158.488	160.128	211.723		1000001046	321.113	202.26	-1125.22		1000000724	85.7219	263.067	-550.213		1000000266	64.7567	39.9246	-275.241
1000060486	159.293	159.774	208.51		1000001046	321.935	204.033	-1125.22		1000000724	85.0425	263.543	-549.816		1000000266	64.3785	39.6061	-276.225
1000060486	159.378	160.204	203.186		1000001046	320.874	203.708	-1125.22		1000000724	85.1617	263.581	-551.084		1000000266	64.5407	39.2023	-276.392
1000060486	158.332	160.129	210.813		1000001046	321.287	204.727	-1125.22		1000000724	84.617	262.905	-551.948		1000000266	63.4385	40.0006	-275.767
1000060486	158.902	159.942	209.481		1000001046	320.682	202.278	-1125.22		1000000724	84.8587	262.473	-551.754		1000000266	63.9798	39.3003	-275.918
1000060486	159.077	159.872	208.706		1000001046	320.243	202.096	-1125.22		1000000724	84.0438	262.779	-551.944		1000000266	63.9713	39.714	-273.985
1000060486	159.232	159.528	208.274		1000001046	320.093	202.686	-1125.22		1000000724	84.6689	262.379	-551.669		1000000266	63.5053	39.1034	-273.582
1000060486	159.357	159.917	208.101		1000001046	320.475	202.776	-1125.22		1000000724	85.0003	262.604	-550.671		1000000266	63.622	38.606	-275.255
1000060486	158.833	159.537	209.211		1000001046	320.71	203.166	-1125.22		1000000724	84.6273	262.685	-547.821		1000000266	64.8717	38.6982	-274.18
1000060486	158.726	160.037	208.253		1000001046	320.798	203.265	-1125.22		1000000724	84.9697	262.81	-548.61		1000000266	64.8694	39.7663	-272.598
1000060486	158.6	160.149	208.11		1000001046	320.037	202.651	-1125.22		1000000724	84.0554	262.776	-548.789		1000000266	65.0901	39.9388	-273.905
1000060486	159.105	160.009	209.29		1000001046	320.743	204.623	-1118.39		1000000724	84.3863	262.962	-547.732		1000000266	66.3224	40.2279	-272.523
1000060486	158.803	159.219	209.132		1000001046	320.442	203.1	-1125.22		1000000724	84.0639	262.647	-547.833		1000000266	65.844	39.9349	-273.186
1000060486	158.64	159.578	207.992		1000001046	321.339	203.705	-1118.09		1000000724	84.8606	263.053	-548.051		1000000266	66.4084	39.1075	-273.49
1000060486	158.869	159.659	209.38		1000001046	320.691	204.322	-1125.22		1000000724	84.8344	262.873	-548.226		1000000266	64.3665	38.5057	-275.435
1000060486	159.075	159.655	209.116		1000001046	319.845	203.644	-1125.22		1000000724	84.6978	263.088	-548.126		1000000266	64.4232	38.8789	-275.075
1000060486	158.531	159.808	208.593		1000001046	320.885	204.283	-1118.98		1000000724	84.4312	262.05	-548.461		1000000266	63.9727	39.5095	-273.953
1000060486	158.861	160.085	209.189		1000001046	321.209	205.33	-1118.46		1000000724	84.3975	262.18	-549.274		1000000266	64.6539	38.757	-276.497
1000060486	158.654	159.642	209.066		1000001046	319.185	205.82	-1118.93		1000000724	84.2736	262.175	-550.283		1000000266	65.8481	38.3463	-276.33
1000060486	159.41	159.745	209.288		1000001046	320.28	205.744	-1118.34		1000000724	84.4653	261.889	-548.057		1000000266	66.2903	38.1999	-274.088
1000060486	158.782	159.615	208.484		1000001046	320.239	204.485	-1118.34		1000000724	84.9561	262.204	-547.551		1000000266	66.4122	37.2384	-275.176
1000060486	159.651	159.573	208.681		1000001046	322.297	205.728	-1118.64		1000000724	84.535	261.822	-546.969		1000000266	66.2458	37.3108	-276.889
1000060486	159.715	159.688	209.445		1000001046	318.744	204.268	-1116.76		1000000724	84.2267	262.549	-547.416		1000000266	65.5381	37.8181	-277.2
1000060486	159.384	159.478	208.484		1000001051	306.357	169.618	-1117.29		1000000724	84.6061	262.154	-546.926		1000000266	65.6857	36.6038	-277.083
1000060486	158.797	159.96	208.954		1000001051	306.598	170.368	-1121.7		1000000724	83.9352	261.97	-547.22		1000000266	65.0372	36.9741	-277.116
1000060486	158.862	159.981	208.133		1000001051	306.097	169.722	-1120.2		1000000724	84.2736	261.793	-546.89		1000000266	64.985	37.4499	-277.356
1000060486	158.684	159.653	209.055		1000001051	305.377	169.502	-1120.45		1000000724	84.1499	261.21	-548.208		1000000266	64.7525	37.5046	-277.063
1000060486	158.924	159.652	208.572		1000001051	306.236	167.641	-1121.42		1000000724	83.8234	261.238	-546.474		1000000266	65.5853	37.3124	-277.872
1000060486	158.72	159.625	207.653		1000001051	306.286	167.479	-1119.31		1000000724	83.6761	261.839	-547.247		1000000266	66.2195	35.3602	-278.024
1000060486	158.822	159.972	207.725		1000001051	306.304	167.317	-1120.69		1000000724	84.5758	261.418	-547.441		1000000266	64.7422	38.0699	-277.089
1000060486	159.012	159.902	208.287		1000001051	308.038	166.003	-1125.22		1000000724	85.222	261.938	-548.034		1000000266	64.1943	37.886	-278.541
1000060486	158.278	160.584	208.434		1000001051	306.115	167.512	-1121.15		1000000724	85.1138	262.049	-546.617		1000000266	65.0958	38.3124	-277.321
1000060486	158.691	159.76	207.753		1000001051	307.151	165.387	-1125.22		1000000724	83.478	262.084	-545.359		1000000266	65.4178	38.075	-277.173
1000060486	158.763	160.175	207.57		1000001051	307.244	165.75	-1125.22		1000000724	84.1868	261.374	-545.744		1000000266	64.3915	38.5364	-275.906
1000060486	158.839	160.351	212.388		1000001051	306.537	166.32	-1125.22		1000000724	83.6683	261.36	-547.332		1000000266	64.2929	38.8016	-276.419
1000060486	159.246	159.598	207.447		1000001051	308.295	163.856	-1125.22		1000000724	84.8381	261.683	-544.319		1000000266	64.3318	38.4135	-277.023
1000060486	158.99	160.282	212.104		1000001051	309.393	163.2	-1125.22		1000000724	83.9633	261.371	-547.861		1000000266	64.7462	38.1287	-277.207
1000060486	157.492	160.18	212.556		1000001051	309.618	162.241	-1125.22		1000000724	83.8613	262.013	-549.032		1000000266	64.6244	38.4955	-276.328
1000060486	158.794	160.364	212.199		1000001051	309.655	162.049	-1125.22		1000000724	84.7174	261.957	-546.486		1000000266	64.6136	37.9505	-276.308
1000060486	159.859	161.688	212.473		1000001051	309.427	161.491	-1125.22		1000000724	84.56	262.523	-545.794		1000000266	64.4357	38.5591	-277.045
1000060486	161.605	161.407	213.313		1000001051	310.42	158.957	-1125.22		1000000724	83.662	262.254	-548.225		1000000266	64.2127	39.0604	-277.007
1000060486	162.057	162.834	212.321		1000001051	310.241	158.966	-1125.22		1000000724	83.5685	261.834	-548.224		1000000266	64.0982	39.6883	-276.508
1000060486	163.76	162.919	211.71		1000001051	310.337	158.457	-1125.22		1000000724	82.3319	262.097	-550.615		1000000266	64.7206	39.3619	-277.168
1000060486	162.983	162.64	212.403		1000001051	310.455	158.225	-1125.22		1000000724	83.7987	261.227	-547.398		1000000266	64.1411	39.469	-277.497
1000060486	163.698	164.783	211.13		1000001051	310.117	159.478	-1125.22		1000000724	83.5502	262.151	-547.596		1000000266	63.9155	39.2116	-275.696
1000060486	165.104	162.873	208.072		1000001051	310.942	158.613	-1125.22		1000000724	83.7624	261.471	-547.417		1000000266	64.2394	39.0619	-277.335
1000060486	167.069	164.421	209.718		1000001051	310.813	158.766	-1125.22		1000000724	83.2925	262.092	-546.291		1000000266	64.4599	38.9729	-277.456
1000060486	166.929	163.021	212.575		1000001051	310.784	158.115	-1125.22		1000000724	82.8201	262.658	-549.09		1000000266	64.5728	39.6975	-276.474
1000060486	171.337	164.434	206.976		1000001051	311.479	157.914	-1125.22		1000000724	82.9504	262.894	-551.337		1000000266	65.126	39.9795	-277.262
1000060486	170.765	163.553	206.731		1000001051	310.715	158.706	-1125.22		1000000724	82.7671	261.877	-552.082		1000000266	64.72	39.8875	-277.416
1000060486	171.318	164.096	205.264		1000001051	309.985	159.411	-1125.22		1000000724	82.2914	261.969	-554.356		1000000266	64.5873	40.1781	-277.963
1000060486	171.246	163.334	209.643		1000001051	309.949	158.45	-1125.22		1000000724	82.9681	261.794	-551.81		1000000266	64.5937	39.609	-277.739
1000060486	170.887	163.532	209.178		1000001051	309.818	159.191	-1125.22		1000000724	83.0374	261.691	-547.828		1000000266	65.0899	39.2805	-279.017
1000062452	46.1895	279.554	210.681		1000001051	311.002	157.769	-1125.22		1000000724	82.7878	261.519	-550.804		1000000266	65.2078	39.494	-277.932
1000062452	44.8319	278.652	208.759		1000001051	311.745	156.948	-1125.22		1000000724	83.7186	261.61	-547.765		1000000266	65.627	39.503	-278.119
1000062452	45.739	278.372	204.518		1000001051	311.603	157.549	-1125.22		1000000724	83.2812	261.998	-546.654		1000000266	64.0126	39.422	-276.653
1000062452	45.3997	278.158	202.052		1000001051	310.114	158.898	-1125.22		1000000724	83.1698	261.798	-548.533		1000000266	63.4725	39.261	-278.363
1000062452	45.162	278.691	202.317		1000001051	309.97	159.163	-1125.22		1000000724	83.4823	261.392	-548.023		1000000266	63.5329	40.0263	-278.002
1000062452	47.074	278.555	201.085		1000001051	309.576	158.967	-1125.22		1000000724	83.5304	261.39	-547.359		1000000266	63.7856	39.9926	-277.921
1000062452	49.306	276.99	198.148		1000001051	310.708	158.441	-1125.22		1000000724	82.6432	261.127	-548.401		1000000266	63.4789	40.0871	-279.018
1000062452	51.0387	277.083	197.791		1000001051	310.245	157.702	-1125.22		1000000724	82.4239	262.209	-549.929		1000000266	63.7049	39.4127	-277.83
1000062452	54.3326	275.697	192.4		1000001051	310.662	158.842	-1125.22		1000000724	82.1103	262.108	-550.723		1000000266	63.92	39.3579	-278.371
1000062452	54.0733	275.212	192.4		1000001051	310.125	158.809	-1125.22		1000000724	83.2295	261.359	-547.607		1000000266	63.4948	40.1246	-277.235
1000062452	54.4075	275.613	192.4		1000001051	309.644	158.285	-1125.22		1000000724	82.1511	261.877	-551.548		1000000266	62.4973	39.7097	-280.946
1000062452	54.2412	275.477	192.4		1000001051	309.727	158.385	-1125.22		1000000724	82.3556	261.528	-552.228		1000000266	62.8471	39.1398	-276.285
1000062452	54.4371	275.63	192.4		1000001051	309.127	159.488	-1119.12		1000000724	83.2517	261.425	-551.314		1000000266	63.5592	38.919	-275.713
1000062452	54.1246	275.664	192.4		1000001051	309.364	158.524	-1125.22		1000000724	80.939	261.205	-551.083		1000000266	62.8983	39.2075	-276.453
1000062452	52.7589	276.366	196.272		1000001051	309.016	158.59	-1118.81		1000000724	79.2431	261.097	-556.318		1000000266	63.0561	40.1616	-275.559
1000062452	54.3087	276.353	192.4		1000001051	309.619	158.838	-1125.22		1000000724	81.5583	261.527	-554.411		1000000266	62.761	39.7967	-275.919
1000062452	52.5623	276.261	196.421		1000001051	311.09	158.305	-1125.22		1000000724	80.8569	262.197	-556.496		1000000266	63.0142	39.2341	-276.418
1000062452	51.8414	276.53	197.864		1000001051	310.424	158.758	-1118.96		1000000724	79.513	262.136	-556.393		1000000266	63.8731	39.9781	-275.671
1000062452	53.3547	276.304	192.4		1000001051	309.63	158.295	-1118.91		1000000724	82.4132	261.183	-552.803		1000000266	63.7188	39.9201	-275.54
1000062452	53.0319	275.577	192.4		1000001051	309.356	159.818	-1119.37		1000000724	81.7851	262.082	-553.309		1000000266	63.9618	39.3155	-276.405
1000062452	53.6524	276.152	192.4		1000001051	307.729	161.413	-1116.79		1000000724	79.3319	262.459	-557.033		1000000266	63.6542	39.0143	-275.773
1000062452	53.7448	276.111	192.4		1000001051	310.039	159.615	-1118.93		1000000724	80.0545	262.674	-556.463		1000000266	63.4173	39.4352	-276.266
1000062452	53.3621	275.802	192.4		1000001051	310.203	158.506	-1119.53		1000000724	82.3216	262.094	-552.279		1000000266	64.2593	39.7124	-275.152
1000062452	51.6693	276.187	195.434		1000001051	309.139	159.002	-1118.66		1000000724	84.7545	262.402	-548.74		1000000266	64.3627	38.9923	-275.565
1000062452	51.3636	275.982	196.219		1000001051	309.347	158.224	-1118.92		1000000724	82.2994	261.627	-551.956		1000000266	64.1477	39.4672	-276.121
1000062452	51.2126	276.431	196.958		1000001051	308.813	159.044	-1118.78		1000000724	82.339	261.693	-550.959		1000000266	63.6287	39.5026	-274.611
1000062452	52.2868	276.353	192.4		1000001051	309.81	158.543	-1119.37		1000000724	81.5168	262.322	-551.74		1000000266	63.9845	39.565	-274.341
1000062452	50.8802	277.658	195.761		1000001051	308.856	159.049	-1119.56		1000000724	81.8254	261.973	-551.28		1000000266	63.4125	39.0014	-276.354
1000062452	49.7436	277.537	197.688		1000001051	308.987	158.63	-1119.12		1000000724	80.0969	260.836	-551.542		1000000266	64.3627	39.2188	-275.882
1000062452	47.7871	277.22	200.397		1000003299	196.4	42.423	-1081.22		1000000724	82.2239	261.105	-551.358		1000000266	64.0117	39.1582	-275.608
1000062452	47.5139	278.131	198.718		1000003299	196.526	41.3622	-1081.06		1000000724	81.4292	260.856	-551.492		1000000266	64.941	39.5436	-273.277
1000062452	48.1039	278.163	197.501		1000003299	196.779	40.9847	-1081.11		1000000724	83.5878	261.328	-548.97		1000000266	65.0095	39.7378	-273.552
1000062452	47.5925	277.701	197.54		1000003299	197.453	41.5159	-1080.68		1000000724	83.2776	262.503	-553.22		1000000266	65.0966	39.4933	-274.994
1000062452	47.5667	277.614	197.75		1000003299	196.401	41.5796	-1080.88		1000000724	83.7187	261.09	-553.192		1000000266	66.7265	39.3622	-272.786
1000062452	45.7199	278.457	201.983		1000003299	195.993	41.2128	-1080.73		1000000724	80.233	262.099	-555.668		1000000266	67.9549	39.6807	-272.425
1000062452	45.2508	278.403	201.609		1000003299	196.004	41.1977	-1081.18		1000000724	82.9832	261.574	-552.039		1000000266	67.1878	39.869	-272.217
1000062452	46.0387	278.184	198.207		1000003299	195.468	40.8268	-1081.03		1000000724	81.9677	261.682	-553.066		1000000266	68.0688	39.2908	-271.917
1000062452	45.013	278.151	200.334		1000003299	195.211	39.8498	-1080.93		1000000724	82.2903	261.313	-552.938		1000000266	67.7523	39.5469	-271.725
1000062452	45.7982	277.404	202.86		1000003299	196.303	40.4604	-1080.92		1000000724	84.0361	261.387	-548.847		1000000266	68.0813	39.9089	-271.658
1000062452	45.9633	278.677	203.543		1000003299	196.334	39.6149	-1081.32		1000000724	82.5402	261.842	-552.57		1000000266	68.0629	39.8819	-271.652
1000062452	45.5718	278.045	202.193		1000003299	197.099	40.1371	-1081.1		1000000724	83.4336	261.243	-548.348		1000000266	67.5548	39.6903	-271.735
1000062452	46.2751	278.865	202.527		1000003299	196.642	40.4075	-1080.63		1000000724	78.443	260.87	-552.191		1000000266	68.4567	40.3075	-271.66
1000062452	46.9013	278.395	203.027		1000003299	196.527	41.2053	-1081		1000000724	80.7829	261.697	-551.48		1000000266	68.1704	40.1605	-271.898
1000062452	47.6412	278.198	203.389		1000003299	196.449	41.7168	-1081.95		1000000724	80.6429	261.685	-552.444		1000000266	67.2276	39.9766	-272.077
1000062452	48.353	277.942	203.458		1000003299	196.353	42.1214	-1081.37		1000000724	80.2951	261.844	-552.801		1000000266	67.2838	40.007	-272.652
1000062452	49.1284	277.693	204.542		1000003299	196.414	40.932	-1081.29		1000000724	80.7687	262.49	-551.509		1000000266	67.4536	40.063	-272.939
1000062452	49.4493	277.448	201.462		1000003299	195.092	39.983	-1081.9		1000000724	80.4809	261.48	-553.1		1000000266	67.3574	39.4224	-272.813
1000062452	49.3331	276.987	202.673		1000003299	194.996	40.0811	-1082.46		1000000724	79.7398	260.993	-552.411		1000000266	66.2084	39.3271	-272.688
1000062452	49.688	276.655	202.598		1000003299	194.789	42.3533	-1083.83		1000000724	82.0624	262.002	-552.612		1000000266	63.7433	40.1458	-275.116
1000062452	49.7998	276.79	201.732		1000003299	195.787	42.2485	-1084.31		1000000724	82.0282	261.368	-553.709		1000000266	64.8076	40.0224	-276.447
1000062452	51.2689	276.705	202.612		1000003299	194.962	41.6368	-1084		1000000724	82.6413	261.157	-552.282		1000000266	65.54	39.1905	-275.494
1000063823	224.028	203.467	211.499		1000003299	195.518	41.6613	-1084.87		1000000724	82.2369	261.887	-552.577		1000000266	65.8598	38.5882	-276.261
1000063823	226.029	204.532	211.004		1000003299	195.041	41.0653	-1083.99		1000000724	80.4324	261.308	-553.162		1000000266	65.4519	38.9987	-275.496
1000063823	227.275	204.698	210.689		1000003299	195.11	40.3377	-1085.21		1000000724	81.0846	261.711	-553.631		1000000266	64.7073	39.0955	-276.446
1000063823	226.607	204.077	212.415		1000003299	196.068	41.3126	-1084.29		1000000724	82.5873	261.338	-553.699		1000000266	64.6894	39.7177	-275.476
1000063823	225.756	204.15	211.409		1000003299	195.264	41.9249	-1083.98		1000000724	83.1993	261	-551.294		1000000266	65.0788	39.6327	-275.182
1000063823	227.818	204.102	209.372		1000003299	195.14	41.4592	-1083.23		1000000724	81.6783	261.045	-553.181		1000000266	64.3892	39.6801	-274.924
1000063823	228.793	205.253	211.688		1000003299	195.31	42.4927	-1083.89		1000000724	81.4064	261.038	-553.627		1000000266	64.0529	39.9736	-275.09
1000063823	233.832	209.31	208.311		1000003299	194.751	41.0115	-1084.9		1000000724	79.4765	261.257	-556.591		1000000266	64.9982	39.8548	-275.991
1000063823	234.002	208.548	207.714		1000003299	194.359	40.6715	-1084.41		1000000724	80.3213	260.875	-555.991		1000000266	64.9177	39.9788	-275.124
1000063823	235.298	210.413	207.01		1000003299	194.082	41.2833	-1084.68		1000000724	80.975	261.451	-556.617		1000000266	63.7155	39.6399	-275.692
1000063823	236.011	211.701	207.145		1000003299	194.928	40.6338	-1083.84		1000000724	81.889	260.36	-553.086		1000000266	64.0498	40.0286	-276.162
1000063823	236.563	210.591	207.601		1000003299	195.215	41.8906	-1083.42		1000000724	77.7377	260.787	-556.864		1000000266	64.4266	39.7485	-274.721
1000063823	236.6	211.37	208.149		1000003299	195.383	42.4956	-1084.07		1000000724	79.6054	261.045	-557.451		1000000266	64.2661	38.8321	-272.652
1000063823	237.203	211.635	208.139		1000003299	195.171	41.1968	-1084.27		1000000724	78.5107	260.74	-554.48		1000000266	64.957	38.6493	-275.733
1000063823	237.608	212.5	207.365		1000003299	195.434	40.7613	-1084.34		1000000724	80.0177	260.63	-553.7		1000000266	64.8618	39.7094	-275.469
1000063823	237.147	212.055	206.616		1000003299	193.224	42.0838	-1084.2		1000000724	80.5559	260.975	-553.379		1000000266	64.7534	39.7084	-273.767
1000063823	237.581	212.399	206.802		1000003299	193.547	42.3233	-1084.75		1000000724	80.3489	261.643	-554.668		1000000266	65.0608	38.8083	-270.848
1000063823	237.946	214.494	203.811		1000003299	194.584	41.8214	-1088.2		1000000724	79.8353	260.95	-553.675		1000000266	65.0435	39.9461	-268.973
1000063823	237.124	215.107	206.642		1000004786	320.345	68.1187	-1104.22		1000000724	79.2034	260.907	-548.787		1000000266	65.3719	40.166	-267.586
1000063823	237.969	216.645	202.508		1000004786	320.856	67.5704	-1104.48		1000000724	80.1015	261.17	-553.523		1000000266	65.3304	40.8109	-267.054
1000063823	237.562	217.817	205.951		1000004786	320.514	67.136	-1102.18		1000000724	80.3526	261.884	-556.143		1000000266	65.6879	40.5294	-267.365
1000063823	237.696	218.386	202.108		1000004786	321.026	66.9736	-1105.18		1000000724	79.9545	262.023	-556.414		1000000266	66.455	40.8238	-267.019
1000063823	237.289	219.876	204.405		1000004786	321.159	66.0411	-1103.41		1000000724	80.1897	262.219	-555.242		1000000266	65.3242	41.2248	-268.272
1000063823	237.065	221.499	203.823		1000004786	320.97	65.9413	-1103.74		1000000724	80.7383	261.365	-552.871		1000000266	65.7007	41.1648	-267.154
1000063823	236.867	222.795	202.182		1000004786	320.027	65.9074	-1101.93		1000000724	80.113	260.518	-553.292		1000000266	65.9516	40.69	-267.772
1000063823	236.892	223.098	203.34		1000004786	320.535	65.3824	-1104.84		1000000724	80.3455	261.586	-555.548		1000000266	67.5386	42.2159	-267.557
1000063823	237.355	226.634	198.678		1000004786	321.174	64.7066	-1105.12		1000000724	80.6645	261.744	-553.299		1000000266	65.7243	41.3982	-267.497
1000063823	237.349	226.49	198.449		1000004786	321.183	64.1324	-1104.27		1000000724	79.0076	260.145	-552.644		1000000266	66.4352	41.9448	-267.219
1000063823	236.821	224.836	202.034		1000004786	322.894	63.7288	-1103.55		1000000725	38.4314	264.924	-554.382		1000000266	66.9698	42.5561	-266.78
1000063823	237.892	227.355	199.055		1000004786	322.793	63.5649	-1103.76		1000000725	38.3475	264.558	-557.29		1000000266	66.8855	42.4065	-266.606
1000063823	237.926	227.27	198.321		1000004786	321.173	63.8658	-1104.57		1000000725	38.2148	264.769	-556.813		1000000266	65.5335	41.3323	-267.278
1000063823	238.091	226.861	198.458		1000004786	321.486	64.2111	-1106.06		1000000725	38.2673	264.789	-556.861		1000000266	65.2288	41.128	-270.372
1000063823	238.524	227.044	198.909		1000004786	321.159	64.8427	-1105.51		1000000725	38.1126	263.517	-556.731		1000000266	65.8253	41.5795	-269.203
1000063823	239.036	227.11	198.516		1000004786	321.898	64.3126	-1105.32		1000000725	38.3029	263.539	-557.505		1000000266	65.0293	40.9197	-269.756
1000063823	239.013	227.727	197.704		1000004786	321.906	63.2859	-1105.39		1000000725	37.7588	263.851	-557.716		1000000266	65.5594	41.3292	-268.882
1000063823	239.451	228.352	195.734		1000004786	322.499	64.1352	-1104.91		1000000725	38.2235	264.412	-558.586		1000000266	64.1452	40.9245	-268.794
1000063823	239.738	228.653	195.205		1000004786	322.611	63.9215	-1105.34		1000000725	37.5353	263.78	-557.949		1000000266	63.6133	40.5983	-268.472
1000063823	239.577	228.662	197.703		1000004786	323.432	63.7161	-1105.68		1000000725	38.4644	263.353	-560.507		1000000266	64.9654	41.2172	-272.231
1000063823	239.727	229.38	196.328		1000004786	323.624	63.4661	-1105.2		1000000725	38.1084	263.789	-558.562		1000000266	64.7215	41.3092	-271.867
1000063823	239.833	230.193	192.4		1000004786	323.516	62.9194	-1106.17		1000000725	38.8028	264.109	-558.77		1000000266	65.0282	41.3469	-270.893
1000063823	239.294	230.22	192.4		1000004786	322.632	64.1262	-1105.09		1000000725	37.607	263.53	-558.085		1000000266	65.3381	41.0648	-271.641
1000063823	240.009	230.309	192.4		1000004786	323.06	63.0672	-1106.22		1000000725	39.1383	263.479	-560.156		1000000266	65.5954	40.9391	-270.829
1000063823	238.999	230.305	192.4		1000004786	323.624	63.2289	-1105.81		1000000725	38.7701	263.646	-559.277		1000000269	138.419	113.061	-272.557
1000063823	238.601	231.258	192.4		1000004786	323.639	63.1393	-1104.25		1000000725	38.3028	262.987	-559.202		1000000269	138.465	112.9	-272.52
1000063823	238.746	231.181	192.4		1000004786	323.518	63.0192	-1104.07		1000000725	37.9274	263.476	-558.416		1000000269	138.76	113.18	-272.884
1000063823	238.503	231.586	192.4		1000004786	323.09	63.3894	-1100.14		1000000725	37.4796	263.426	-559.619		1000000269	138.854	112.994	-273.206
1000063823	238.076	232.579	192.4		1000004786	324.15	62.973	-1104.64		1000000725	38.4351	263.133	-557.739		1000000269	139.675	112.868	-273.071
1000063823	238.263	232.467	192.4		1000004786	324.39	62.6247	-1106.13		1000000738	80.5495	244.687	-546.894		1000000269	139.614	112.873	-274.063
1000063823	237.947	232.697	192.4		1000004786	324.429	61.468	-1105.54		1000000738	79.9616	244.749	-544.077		1000000269	140.046	113.688	-273.184
1000063823	238.138	232.269	192.4		1000004786	326.008	60.4068	-1109.6		1000000738	80.0196	245.158	-547.152		1000000269	140.739	113.221	-273.312
1000063823	239.764	225.903	197.161		1000004786	325.891	60.2349	-1109.4		1000000738	78.975	244.847	-545.199		1000000269	141.623	113.757	-273.208
1000063823	239.982	227.416	192.4		1000004786	325.676	60.0672	-1108.32		1000000738	79.0652	244.15	-545.982		1000000269	141.4	112.679	-275.866
1000063823	239.79	225.613	196.083		1000004786	325.706	58.7462	-1106.32		1000000738	79.055	245.136	-543.941		1000000269	141.545	112.124	-276.391
1000063823	239.864	226.19	198.267		1000004786	325.687	58.5069	-1107.97		1000000738	79.1816	245.017	-545.597		1000000269	140.861	111.187	-277.237
1000063823	240.776	225.074	197.914		1000004786	326.494	58.1267	-1109.66		1000000738	78.8159	245.332	-545.666		1000000269	140.755	111.969	-277.034
1000063823	239.863	224.934	196.271		1000004786	329.3	57.5081	-1105.65		1000000738	79.3999	245.531	-542.641		1000000269	141.347	112.946	-276.592
1000063823	240.205	228.929	192.4		1000004786	329.54	57.2445	-1107.25		1000000738	79.2591	244.8	-543.708		1000000269	141.08	112.16	-276.934
1000063823	239.404	229.829	192.4		1000004786	329.007	56.5528	-1104.03		1000000738	78.9861	245.26	-546.011		1000000269	141.706	112.652	-276.656
1000063823	240.711	230.128	192.4		1000004786	328.787	56.6981	-1105.62		1000000738	79.6257	245.238	-545.421		1000000269	142.112	112.199	-276.87
1000063823	238.478	230.016	192.4		1000004786	328.034	56.5125	-1101.41		1000000738	80.1849	244.888	-547.08		1000000269	142.937	113.068	-276.884
1000063823	239.505	230.511	192.4		1000004786	328.018	57.149	-1106.77		1000000738	80.9281	244.382	-548.899		1000000269	142.154	112.898	-276.863
1000063823	239.587	230.307	192.4		1000004786	327.184	56.0694	-1106		1000000738	81.2949	244.806	-550.068		1000000269	141.929	113.026	-276.735
1000067991	333.686	232.251	192.4		1000004786	328.11	55.2462	-1104.6		1000000738	80.7718	245.24	-547.798		1000000269	142.641	113.36	-276.959
1000067991	333.125	232.771	192.4		1000004786	328.675	55.1912	-1104.3		1000000738	81.2197	245.033	-547.787		1000000269	142.976	113.861	-276.358
1000067991	332.944	232.032	192.4		1000004786	328.926	55.1343	-1104.16		1000000738	80.1424	245.283	-548.065		1000000269	143.271	113.076	-276.327
1000067991	332.315	231.47	192.4		1000004786	329.183	54.4853	-1101.3		1000000738	79.4973	244.87	-547.029		1000000269	143.523	113.512	-276.023
1000067991	333.133	231.385	192.4		1000004786	330.349	53.3239	-1098.93		1000000738	80.2246	246.109	-547.174		1000000269	143.639	113.192	-274.209
[truncated: 15,905 more rows]

## Sheet: 2F
(left panel)							(right panel)
Displacement Rate of pDCs							Displacement Rate of pDCs (Average/Mouse)
pTCRAGFP Cd169DTR/WT Infected - DT	pTCRAGFP Cd169DTR/WT Infected + DT	pTCRAGFP -> Cd169DTR/WT Infected -DT	pTCRAGFP -> Cd169DTR/WT Infected +DT	pTCRAGFP -> WT Naïve	pTCRAGFP -> WT Infected		pTCRAGFP Cd169DTR/WT Infected -DT	pTCRAGFP Cd169DTR/WT Infected + DT	pTCRAGFP -> Cd169DTR/WT Infected - DT	pTCRAGFP -> Cd169DTR/WT Infected + DT	pTCRAGFP -> WT Naïve	pTCRAGFP -> WT Infected
1.31135	1.31135	0.171492	0.362872	4.65601	0.021652		0.7232	1.514	0.7425	1.239	0.9468	0.6099
0.68805	0.68805	0.471954	0.289451	2.10185	0.442222		0.6315	1.052	0.8919	1.498	1.758	0.3899
0.41819	0.41819	0.041007	0.19987	3.18476	0.20404			1.135	0.7493	1.966	0.859	0.453
2.317	2.317	0.05951	7.30604	0.164859	0.056274					1.958	2.591	0.6383
1.57965	1.57965	0.207458	0.428468	3.20398	0.142471
1.26665	1.26665	0.665422	0.948938	0.161948	0.383384
0.215439	0.215439	0.155046	1.17834	0.776515	3.36042
0.892483	0.892483	1.61516	4.47637	0.510946	0.150138
0.240375	0.240375	0.150145	1.25634	4.19104	1.12054
0.146402	0.146402	0.114985	4.23399	3.50386	1.70755
0.129633	0.129633	0.765574	1.10699	3.08475	0.225792
0.205018	0.205018	0.091262	0.629841	0.537585	0.225468
0.258598	0.258598	0.675588	0.588148	1.59402	0.297006
0.703793	0.703793	0.117015	1.8416	1.18305	0.673779
0.785468	0.785468	0.136956	3.73234	1.09519	1.13081
0.166523	0.166523	1.4573	1.58584	0.106262	0.448151
0.176223	0.176223	0.377798	2.03781	0.649685	0.367822
0.138597	0.138597	0.273863	0.670479	2.66836	0.656284
0.996036	0.996036	0.310335	0.19218	1.13513	0.220547
0.513686	0.513686	0.883411	2.26926	0.571463	0.062257
0.176034	0.176034	1.06551	0.779544	0.099235	0.42804
1.60381	1.60381	0.540362	2.22921	5.95789	0.323487
0.774856	0.774856	0.265089	4.00398	0.759118	0.829789
0.105362	0.105362	5.79993	0.514817	0.130823	1.1766
1.56084	1.56084	0.370345	2.14906	0.404428	0.984374
0.276326	0.276326	1.43941	4.1669	0.223837	0.082872
0.384804	0.384804	0.061641	0.662786	2.10884	0.41238
2.86306	2.86306	1.22238	1.56668	2.19914	1.56001
0.381592	0.381592	0.973992	2.35673	0.098923	0.817597
0.873947	0.873947	0.641223	5.37604	1.46187	0.123467
0.685057	0.685057	8.21541	0.236997	0.583297	0.114821
0.584829	0.584829	0.330852	2.45912	2.04831	0.6879
1.05478	1.05478	2.3419	0.203801	0.592003	1.56697
0.777623	0.777623	1.21728	3.44841	0.09636	0.720621
0.625044	0.625044	0.537078	1.50614	1.48568	0.166104
0.923446	0.923446	1.3392	1.05994	0.459355	0.433743
1.70696	1.70696	0.559082	1.08691	0.188044	0.115995
1.27908	1.27908	0.226069	0.280876	0.729292	0.147655
0.507032	0.507032	1.22025	0.951787	1.28791	0.305804
1.02011	1.02011	0.763392	5.46743	1.10571	1.05719
1.18566	1.18566	1.18384	1.32325	4.49124	0.287641
3.74599	3.74599	1.19337	1.5669	0.494915	0.35285
0.578982	0.578982	2.94976	0.601956	5.48335	0.855899
0.261987	0.261987	0.680034	1.6736	1.24283	1.29573
0.57876	0.57876	2.28355	1.25731	3.56067	0.608012
0.546233	0.546233	1.06457	2.25197	4.55773	1.39312
0.412736	0.412736	0.507735	1.4392	3.44957	1.14074
0.82791	0.82791	0.129783	1.00298	0.450117	0.25787
1.80132	1.80132	0.408526	3.03588	1.71964	0.567505
1.5592	1.5592	0.319975	1.50307	1.01209	0.155789
2.61174	2.61174	1.1081	3.51828	2.04195	0.059321
0.453986	0.453986	0.50787	3.14805		0.201052
2.68192	2.68192	0.205754	0.191849		0.675804
1.02152	1.02152	0.240766	1.08939		0.03784
1.57957	1.57957	0.232485	4.93329		0.143671
4.65794	4.65794	0.117333	0.95785		0.758971
6.89684	6.89684	0.458838	2.34967		0.114207
1.60036	1.60036	0.278418	0.704977		0.096588
1.01175	1.01175	0.095406	1.39858		0.875449
1.13625	1.13625	0.439179	1.37766		0.229816
0.414162	0.414162	0.611458	0.981406		0.211202
2.42357	2.42357	0.098509	1.54001		0.475738
1.77566	1.77566	0.112886	0.374706		0.4997
4.06297	4.06297	0.226534	0.09123		0.55936
3.42168	3.42168	0.526585	0.398245
2.12557	2.12557	0.873301	3.7203
0.540334	0.540334	0.510034	2.79826
0.133386	0.133386	1.94533	5.9413
0.942413	0.942413	0.152187	2.33071
10.5892	10.5892	0.505065	1.38541
0.16197	0.16197	0.833945	1.39092
0.740363	0.740363	0.101313	0.128659
0.868021	0.868021	0.298187	0.727689
2.38861	2.38861	0.316284	1.8528
0.629454	0.629454	0.730997	1.91109
0.197055	0.197055	0.135107	1.04977
0.260263	0.260263	0.566876	0.20952
0.197256	0.197256	0.388013	0.943181
0.249641	0.249641	2.41597	1.24803
2.41932	2.41932	1.41123	1.66835
0.631911	0.631911	0.257793	1.12879
0.067124	0.067124	0.192018	1.64151
2.58123	2.58123	1.00414	0.548303
0.384786	0.384786	1.80852	0.136933
0.136287	0.136287	0.150648	0.951022
2.81579	2.81579	0.887711	0.191517
0.515386	0.515386	0.357937	0.324024
0.044728	0.044728	1.8123	0.211394
2.17891	2.17891	0.535809	1.4326
0.268782	0.268782	0.109356	0.214546
0.799385	0.799385	0.57846	0.129992
0.832511	0.832511	1.21629	0.648925
2.12342	2.12342	0.604049	0.516786
1.78332	1.78332	0.672347	0.132367
0.369602	0.369602	0.500955	1.24307
0.394172	0.394172	0.408092	1.01825
0.156158	0.156158	0.184762	0.426614
0.560871	0.560871	0.283325	0.70392
0.665727	0.665727	0.325091	3.88754
1.35727	1.35727	0.214212	2.54298
3.45463	3.45463	0.831807	0.619428
8.5045	8.5045	0.213746	1.62206
2.61129	2.61129	0.365978	1.22879
0.37206	0.37206	0.21085	2.26834
0.523447	0.523447	0.579412	0.545973
0.750741	0.750741	0.20688	0.813345
0.149511	0.149511	0.470891	3.45308
0.134147	0.134147	0.157078	0.50631
1.27987	1.27987	1.2794	0.531909
0.042948	0.042948	0.61992	0.264136
0.599465	0.599465	0.341172	0.720231
2.45992	2.45992	0.105754	0.59323
0.717144	0.717144	0.108395	3.30229
1.71454	1.71454	0.149525	0.18941
0.419587	0.419587	0.421819	0.392225
5.10946	5.10946	3.11937	0.354873
0.511381	0.511381	1.06996	0.34019
4.56928	4.56928	0.739691	1.34935
0.962854	0.962854	0.327653	0.75954
0.007537	0.007537	0.631144	1.80852
6.10787	6.10787	1.51496	1.36807
1.04469	1.04469	0.513051	1.90684
2.64336	2.64336	0.737403	0.757959
0.730687	0.730687	0.489552	1.30408
2.30126	2.30126	0.093755	2.98631
4.76789	4.76789	0.311443	0.507076
0.162221	0.162221	0.882552	0.610226
1.22344	1.22344	1.06346	1.05079
2.83513	2.83513	0.378223	1.14728
0.787409	0.787409	0.025438	0.94521
0.260176	0.260176	0.301365	0.553223
1.19143	1.19143	3.04593	0.983962
2.38858	2.38858	5.59514	1.07691
1.32083	1.32083	0.825728	0.357052
0.089315	0.089315	0.248084	2.07262
4.25298	4.25298	0.441157	0.790647
2.35076	2.35076	0.090837	1.90787
0.391631	0.391631	1.13762	1.92035
0.476576	0.476576	0.147678	2.38237
0.112646	0.112646	0.470188	1.00231
2.23042	2.23042	0.445813	0.168984
3.18205	3.18205	1.98278	0.122162
2.01542	2.01542	0.380246	0.586119
0.587659	0.587659	3.1664	0.82023
3.77702	3.77702	1.32732	0.737885
4.36517	4.36517	0.875507	1.67528
0.231567	0.231567	0.642976	0.418925
2.81681	2.81681	1.49007	0.220702
3.5389	3.5389	0.31863	1.88466
0.202289	0.202289	0.414073	0.396348
1.69544	1.69544	0.466542	0.262886
0.089373	0.089373	1.29792	1.51242
1.71187	1.71187	0.943099	0.337025
6.28792	6.28792	1.21536	1.19509
1.24924	1.24924	0.363623	1.1929
0.758	0.758	0.116469	2.75587
1.2615	1.2615	0.27372	0.222232
1.76288	1.76288	1.68382	0.968945
0.233956	0.233956	0.978418	1.54863
0.238069	0.238069	0.398893	1.56647
1.61994	1.61994	0.826471	1.39598
0.22147	0.22147	0.044217	1.36091
2.40207	2.40207	0.064228	0.910878
1.23988	1.23988	0.057167	0.781445
0.477889	0.477889	0.014683	0.426155
0.504282	0.504282	0.109511	0.779896
0.347667	0.347667	0.049032	0.413652
0.596747	0.596747	0.04824	2.74793
0.568537	0.568537	0.109734	1.56604
0.317225	0.317225	0.070743	1.84712
1.39075	1.39075	0.042881	0.229378
4.51729	4.51729	0.091859	0.451265
0.799276	0.799276	0.081476	0.40814
0.215081	0.215081	0.095982	2.30031
0.118946	0.118946	6.52455	1.93544
1.11591	1.11591	0.119001	0.405634
0.152533	0.152533	3.39211	1.08705
0.821416	0.821416	0.303206	1.01944
0.251433	0.251433	0.139428	1.73509
1.00609	1.00609	0.334369	1.0347
0.449829	0.449829	0.793574	0.660746
0.212369	0.212369	0.345597	2.50684
0.526208	0.526208	1.2674	4.27685
0.186849	0.186849	0.385527	2.43091
3.23147	3.23147	0.159693	0.493025
3.79189	3.79189	0.099003	0.116145
2.79072	2.79072	2.87485	5.91516
3.63331	3.63331	1.17689	0.645142
0.955445	0.955445	0.724885	2.59375
4.42813	4.42813	0.159638	0.425262
4.13874	4.13874	2.7999	4.71596
1.71153	1.71153		5.50473
4.3932	4.3932		1.84193
0.724851	0.724851		1.71017
8.48338	8.48338		1.8894
0.664758	0.664758		0.478279
2.29314	2.29314		0.662136
3.42356	3.42356		2.01469
4.06723	4.06723		1.75783
0.101591	0.101591		2.10335
0.124273	0.124273		0.261427
2.52839	2.52839		0.131244
0.182101	0.182101		0.127332
0.992945	0.992945		0.784842
11.0517	11.0517		0.164591
0.76573	0.76573		0.369733
1.53982	1.53982		0.311231
0.390337	0.390337		0.342415
0.352396	0.352396		0.228145
0.568628	0.568628		2.26184
0.91358	0.91358		0.51417
1.30877	1.30877		0.624877
1.25572	1.25572		1.14657
0.334714	0.334714		0.464418
1.09933	1.09933		0.101377
6.71202	6.71202		0.044986
0.698471	0.698471		0.284524
2.10749	2.10749		1.7756
0.883205	0.883205		0.83454
0.828602	0.828602		0.093574
0.154184	0.154184		3.63155
0.710539	0.710539		1.84631
0.422882	0.422882		1.0994
0.07396	0.07396		0.311158
0.246577	0.246577		0.415579
0.570871	0.570871		0.340729
0.520095	0.520095		0.188092
0.842463	0.842463		0.723269
0.132101	0.132101		0.112747
0.109823	0.109823		1.08127
1.22191	1.22191		1.22319
1.48891	1.48891		0.357329
1.18064	1.18064		0.907286
0.220134	0.220134		0.369301
0.085815	0.085815		0.771247
0.375846	0.375846		0.798908
0.256658	0.256658		1.81011
0.447908	0.447908		1.3645
0.699377	0.699377		0.904753
0.719484	0.719484		0.768173
0.322665	0.322665		0.778294
0.601038	0.601038		1.89859
0.75524	0.75524		5.69386
4.07956	4.07956		1.73955
0.28309	0.28309		1.05825
0.070931	0.070931		0.818037
0.359252	0.359252		0.647452
0.287349	0.287349		0.838213
0.612719	0.612719		1.30035
0.576783	0.576783		0.541876
1.36201	1.36201		0.364389
0.547688	0.547688		0.245499
0.522621	0.522621		0.439768
0.180766	0.180766		0.082845
0.089614	0.089614		0.221141
1.65377	1.65377		0.29185
1.57567	1.57567		0.232718
1.33214	1.33214		1.82089
1.36294	1.36294		0.288031
0.248765	0.248765		1.47963
2.3653	2.3653		0.250719
4.33528	4.33528		1.09217
1.27411	1.27411		2.07393
0.267467	0.267467		0.742034
4.57721	4.57721		1.37074
1.10587	1.10587		1.58828
1.04502	1.04502		0.116042
0.154538	0.154538		0.626982
1.23476	1.23476		1.08173
1.99853	1.99853		0.235341
0.393167	0.393167		1.74961
0.889297	0.889297		2.25926
1.33345	1.33345		6.57887
0.194177	0.194177		1.47236
1.03723	1.03723		1.05087
0.207749	0.207749		0.996424
0.699197	0.699197		2.52714
0.669978	0.669978		0.995303
0.549341	0.549341		0.654131
1.30782	1.30782		1.42707
2.12028	2.12028		0.115209
0.649793	0.649793		4.35783
0.612596	0.612596		3.75647
1.2577	1.2577		2.40284
0.433421	0.433421		1.61137
1.47354	1.47354		0.387393
0.860221	0.860221		0.47079
0.361621	0.361621		0.635254
0.570342	0.570342		2.51338
0.256922	0.256922		1.38354
4.30363	4.30363		0.466383
0.920555	0.920555		1.59622
0.534864	0.534864		0.329787
1.21328	1.21328		0.699233
0.552435	0.552435		0.639033
1.95783	1.95783		1.50655
6.45292	6.45292		0.104687
1.42591	1.42591		3.95493
0.11951	0.11951		0.34703
1.11529	1.11529		1.71235
3.64371	3.64371		0.67277
2.04129	2.04129		0.633454
0.569125	0.569125		1.1771
2.86558	2.86558		2.85111
0.590027	0.590027		2.62588
0.04135	0.04135		2.11783
0.627621	0.627621		0.1478
0.984038	0.984038		1.24371
0.212419	0.212419		0.928039
0.508472	0.508472		1.4456
0.327069	0.327069		5.00124
0.224128	0.224128		0.119807
0.087082	0.087082		3.0735
0.19852	0.19852		1.8146
0.421269	0.421269		2.8546
0.321841	0.321841		0.312582
0.443652	0.443652		3.92381
0.424063	0.424063		0.558546
0.725905	0.725905		3.63901
0.129629	0.129629		1.3542
0.640521	0.640521
1.07431	1.07431
1.6656	1.6656
4.40886	4.40886
0.06697	0.06697
0.088834	0.088834
0.544869	0.544869
0.315078	0.315078
0.197107	0.197107
0.712292	0.712292
7.50998	7.50998
0.347966	0.347966
0.403919	0.403919
2.93055	2.93055
0.488394	0.488394
4.75348	4.75348
1.45225	1.45225
0.764093	0.764093
0.480304	0.480304
0.207892	0.207892
0.329182	0.329182
1.38757	1.38757
7.60078	7.60078
2.09829	2.09829
0.198827	0.198827
0.057242	0.057242
2.77659	2.77659
0.134975	0.134975
0.218765	0.218765
2.71308	2.71308
0.426546	0.426546
0.420899	0.420899
0.390196	0.390196
2.14567	2.14567
0.669437	0.669437
6.72845	6.72845
0.762055	0.762055
0.126477	0.126477
2.31042	2.31042
0.132248	0.132248
1.47212	1.47212
0.295958	0.295958
3.56949	3.56949
0.913669	0.913669
0.19609	0.19609
0.983673	0.983673
0.213805	0.213805
0.620697	0.620697
0.313693	0.313693
0.207951	0.207951
1.08983	1.08983
0.520092	0.520092
0.319293	0.319293
1.58179	1.58179
0.434887	0.434887
0.326478	0.326478
0.732439	0.732439
0.468693	0.468693
0.08396	0.08396
0.917965	0.917965
1.13016	1.13016
1.46682	1.46682
4.33568	4.33568

## Sheet: 2G
(left panel)								(middle panel)									(right panel)
pTCRAGFP Cd169DTR/WT Infected -DT				pTCRAGFP Cd169DTR/WT Infected + DT				pTCRAGFP -> Cd169DTR/WT Infected - DT				pTCRAGFP -> Cd169DTR/WT Infected + DT					Slope of MSD (per mouse)
Time (seconds)	Mean	SD	N	Time (seconds)	Mean	SD	N	Time (seconds)	Mean	SD	N	Time (seconds)	Mean	SD	N		pTCRAGFP Cd169DTR/WT Infected - DT	pTCRAGFP Cd169DTR/WT Infected + DT	pTCRAGFP -> Cd169DTR/WT Infected - DT	pTCRAGFP -> Cd169DTR/WT Infected + DT
0	0	0	191	0	0	0	320	0	0	0	156	0	0	0	383		0.3087	0.797	0.1757	0.494
20	6.21927	9.56529	191	20	7.44577	11.1825	320	20	6.0316	9	156	20	7.69686	10.7998	383		0.3351	0.5874	0.4093	0.4865
40	10.831	16.7698	191	40	13.9055	18.9118	320	40	8.57699	15	156	40	13.7588	18.4946	383		0.4336	0.5678		0.8356
60	15.9967	28.577	191	60	22.2653	29.1057	320	60	11.7653	18	156	60	23.241	35.8422	383			0.7463
80	23.245	44.4942	191	80	30.781	43.0051	320	80	14.7549	22	156	80	31.3521	51.1147	383
100	31.3941	63.8108	191	100	42.0029	62.5554	320	100	18.8903	30	156	100	40.9076	72.3642	383
120	38.1916	95.7272	191	120	52.6407	78.8088	320	120	23.1663	41	156	120	54.1012	95.4563	383
140	46.394	118.88	191	140	63.7465	96.4251	320	140	25.7322	47	156	140	66.0859	123.37	383
160	55.5953	157.28	352	160	84.4922	129.372	583	160	32.4995	60	156	160	91.4285	177.776	601
180	64.0766	186.913	191	180	103.129	164.236	320	180	39.3712	82	156	180	105.733	218.867	383
200	70.5966	197.31	191	200	109.829	175.979	368	200	42.9959	87	156	200	119.393	250.525	383
220	79.6246	207.676	191	220	129.362	211.171	320	220	49.2226	101	156	220	133.75	286.024	383
240	81.9312	212.113	190	240	147.501	252.191	317	240	46.8005	92	277	240	149.696	320.906	383
260	89.1827	229.609	190	260	160.881	277.658	321	260	59.4848	116	156	260	166.71	359.315	383
280	93.7876	238.037	186	280	178.352	318.586	313	280	64.2302	123	156	280	167.355	368.192	548
300	98.1471	250.918	182	300	192.663	350.639	305	300	66.939	127	156	300	196.301	428.269	383
320	104.728	255.037	176	320	207.064	388.566	292
