# Supplementary material for: CD169+ macrophages orchestrate plasmacytoid dendritic cell arrest and retention for optimal priming in the bone marrow of malaria-infected mice
Source: eLife. 2022 Oct 24;11:e78873. doi: 10.7554/eLife.78873 (PMC9648966; doi:10.7554/eLife.78873)
Supplement: Figure 3—figure supplement 1—source data 1. [file elife-78873-fig3-figsupp1-data1.xlsx]

## Sheet: 3C
CCR9 MFI on pDCs				CXCR4 MFI on pDCs				CX3CR1 MFI on pDCs				CXCR3 MFI on pDCs				ICAM1 MFI on pDCs				CD11a MFI on pDCs				VCAM1 MFI on pDCs
WT Naive	WT PyYM	TLR7 Naive	TLR7 PyYM	WT Naive	WT PyYM	Tlr7-/y Naive	Tlr7-/y PyYM	WT Naive	WT PyYM	Tlr7-/y Naive	Tlr7-/y PyYM	WT Naive	WT PyYM	Tlr7-/y Naive	Tlr7-/y PyYM	WT Naive	WT PyYM	Tlr7-/y Naive	Tlr7-/y PyYM	Naive WT	PyYM WT	Tlr7-/y Naive	Tlr7-/y PyYM	WT Naive	WT PyYM	Tlr7-/y Naive	Tlr7-/y PyYM
1771	1797	1399	1042	31.9	32.5	30.9	13.8	43.2	50.4	48.8	64.8	142	15	153	88.8	654	1119	460	687	13202	10371	11369	9619	286	83	368	168
1529	1819	1238	1113	28.9	29.1	21.2	18.1	36.8	68.6	88.3	63.5	149	19.7	137	84.1	601	1286	391	564	13140	9984	12104	10648	201	82.1	257	178
1536	2164	1287	1617	22.3	6.86	25.3	19	67.2	76.8	53.8	54.8	158	46.32	159	92.3	620	1855	467	730	7971	5903	12484	12056	142	52.7	264	149
1167	2122	1413	1161	16.4	4.48	22.3	15.5	61.2	68.9	59.6	73.1	165	47.74	188	61.9	590	1571	490	545	8597	7082	8003	8825	94.7	40.9	136	111
		1447	1970	58.2	135	28.6	15.2	45.2	90.6	49.9	53.6	138	27	199	110.6	552	2452	620	873	8201	5659	7103	8431			193	136
			2240	59.8	72.9	44.7	4.22	46.6	89.1	64.8	53.7	134	20.6	128	110.3	627	2090	642	915	7702	7055	6551	10623				193
					73.9	53.4	61.5		106	63.2	56		16.2	107	56.7		2265	614	923		5495	9806	11459
							67				69.6				45.3				829
