# Supplementary material for: CD169+ macrophages orchestrate plasmacytoid dendritic cell arrest and retention for optimal priming in the bone marrow of malaria-infected mice
Source: eLife. 2022 Oct 24;11:e78873. doi: 10.7554/eLife.78873 (PMC9648966; doi:10.7554/eLife.78873)
Supplement: Figure 3—source data 1. [file elife-78873-fig3-data1.xlsx]

## Sheet: 3A
Uninfected WT PTCRA-EGFP					Py YM-infected, 36 hrs WT PTCRA-EGFP					Uninfected Tlr7y/- PTCRA-EGFP					Py YM-infected, 36 hrs Tlr7y/- PTCRA-EGFP
										170921_tlr7naive(1.5x)_movie_01 pdc tracks v5 xyz centroid					190313_Tlr736hr_actual 2x pDC tracks v3 (w msd) xyz centroid
Track ID	Centroid X (µm)	Centroid Y (µm)	Centroid Z (µm)		Track ID	Centroid X (µm)	Centroid Y (µm)	Centroid Z (µm)		Track ID	Centroid X (µm)	Centroid Y (µm)	Centroid Z (µm)		Track ID	Centroid X (µm)	Centroid Y (µm)	Centroid Z (µm)
158	26.87	206.84	6.22		126	0.827	11.79	16.67		171	219.81	39.63	20.6		291	81.51	1.48	7.87
158	25.78	206.27	5.77		126	1.14	12.26	15.89		171	220.31	39.45	20.69		291	80.64	1.68	9.69
158	24.53	209.43	6.02		126	1.53	12.45	16.1		171	220.24	39.48	20.78		291	78.47	5.46	7.83
158	25.69	205.77	6.46		126	1.59	12.36	15.47		171	220.03	38.79	19.73		291	80.1	2.97	13.87
158	25.06	205.99	6.74		126	1.55	13.03	17.75		171	219.5	39.2	19.67		291	80.39	2.34	15.2
158	24.7	206.16	6.39		126	1.61	13.43	16.4		171	219.22	39.68	19.22		291	80.17	2.74	14.82
158	24.65	204.65	6.48		126	1.73	13.13	16.3		171	219.05	39.96	19.64		291	80.23	2.27	15.1
158	24.5	203.8	6.82		126	1.7	13.52	17.61		171	219.52	40.19	20.26		291	78.36	2.98	15.37
158	23.6	207.87	7.49		126	2.31	14.18	16.99		171	219.38	39.99	20.67		291	78.28	3.24	16.6
158	25.65	203.75	8.2		126	2.18	14.48	16.68		171	219.45	40.58	21.07		291	78.87	4.05	16.32
158	25.56	203.11	7.27		126	2.72	14.64	17.45		171	219.16	40.11	22.61		291	78.38	4.47	15.24
158	25.88	202.17	7.24		126	2.36	14.76	16.6		171	218.89	40.05	21.69		291	77.47	4.04	16
158	26.76	199.55	7.26		126	1.88	14.39	17.42		171	219.34	41.13	23.04		291	74.55	3.19	17.85
158	26.8	199.21	8.66		126	2.13	15.59	16.46		171	219.09	41.04	22.12		291	75.6	4.72	15.61
158	26.23	199.82	7.63		126	1.87	14.98	16.48		171	218.98	41.27	23.42		291	75.01	4.63	16.31
158	26.33	200.55	7.02		126	2.15	16.42	16.87		171	218.9	41.5	22.15		291	74.46	4.53	17.01
158	26.22	200.77	6.91		126	1.88	15.6	16.57		171	218.39	42.46	21.93		291	71.21	4.39	17.55
158	26.21	200.19	6.47		126	2.58	15.33	16.83		171	218.03	42.52	21.9		291	70.88	4.72	17.59
158	26.11	200.34	5.92		126	1.58	15.18	16.78		171	217.79	43.04	22.3		291	70.14	5.08	15.96
158	26.13	199.65	6.46		126	1.93	14.87	15.82		171	217.79	43.36	21.68		291	69.07	4.82	16.46
158	25.87	200.16	5.72		126	1.73	15.46	16.43		171	217.5	43.59	21.19		291	68.73	5.71	16.65
158	25.65	200.05	6.76		126	2.17	16.1	14.3		171	217.53	44.37	22.91		291	67.6	5.28	16.63
158	25.14	200	7.11		126	2.61	16.57	14.85		171	216.97	43.97	23.88		291	67.16	4.69	15.55
158	24.94	200.34	6.89		126	3.32	16.99	14.95		171	217.05	44.52	24.43		291	66.56	4.6	14.18
158	24.52	201.13	8		126	4.09	17.36	14.79		171	217.05	44.49	22.78		291	66.02	5.31	15.52
158	24.18	201.05	7.05		126	4.03	18.01	13.56		171	217.23	44.86	23.12		291	64.34	6.85	13.34
158	24.14	201.08	7.24		126	3.98	17.99	13.64		171	217.25	44.9	22.72		291	62.88	6.99	11.5
158	23.53	201.87	7.15		126	3.85	18.83	13.93		171	217.33	44.34	23.57		291	61.44	7.09	13.56
158	22.95	202.41	7.59		126	4.43	19.39	13.82		171	216.54	45.37	23.21		291	61.24	6.87	11.23
158	22.47	202.56	8.48		126	4.61	19.39	13.47		171	216.6	44.92	23.54		291	61.14	6.95	12.02
158	23.03	201.07	7.89		126	4.6	20.15	13.14		171	216.98	44.21	25.09		291	60.69	7.02	11.92
158	23.38	200.44	9.18		126	4.47	19.97	13.64		171	217.14	45.26	24.34		291	60.44	6.82	11.19
158	23.63	200.92	8.64		126	4.44	20.12	12.8		171	216.93	44.69	25.06		291	59.49	7.14	11.77
158	23.04	201.59	9.68		126	4.74	21.21	12.42		171	217.17	45.54	23.66		291	59.36	6.59	12.21
158	23.32	201.23	8.58		126	5.49	20.93	13.04		171	216.84	45.5	24.97		291	59.56	6.52	11.13
158	23.14	200.96	8.27		126	5.32	21.56	12.61		171	216.37	46.16	24.67		291	59.17	6.34	10.89
158	22.61	201.61	8.48		126	6.32	22.38	9.21		171	216.11	46.6	24.93		291	58.98	7.15	11.22
158	22.84	201.66	8.1		126	5.89	22.59	10.17		171	216.51	46.14	25.94		291	58.98	6.59	11.42
158	22.36	201.2	8.02		126	5.95	22.78	8.27		171	215.7	46.88	25.28		291	59.28	7.04	10.68
158	21.83	201.8	7.39		126	6.18	22.83	6.25		171	216.51	46.55	26.01		291	59.27	6.8	10.81
158	22.02	201.75	7.67		126	5.76	22.53	6.3		171	216.07	46.52	27.1		291	59.21	6.94	11.01
158	20.6	203.15	6.62		126	7.27	23.18	5.26		171	215.9	46.36	23.98		291	59.46	7.48	10.9
158	20.56	202.62	5.92		126	6.95	22.69	5.22		171	214.92	46.55	22.54		291	59.03	7.33	10.5
158	18.78	204.02	5.7		126	7.12	23.06	5.39		171	214.17	46.53	22.58		291	58.34	6.9	11.19
158	18.77	203.89	6.56		126	6.77	23.56	4.79		171	213.93	46.34	23.23		291	58.59	6.29	10.29
158	19.18	203.04	6.88		126	7.02	23.47	4.6		171	214.74	45.81	25.15		291	59.22	6.47	11.35
158	19.69	202.61	5.05		126	6.77	23.82	4.65		171	214.82	46.11	26		291	58.36	5.05	10.34
158	19.2	203.07	7.4		126	7.22	23.93	4.73		171	215.23	45	25.92		291	58.59	6.16	9.77
158	19.22	202.88	6.39		126	7.66	23.44	4.73		171	214.86	46.06	27.47		291	58	3.43	9.03
158	17.81	204.49	6.11		126	8.29	23.71	4.36		171	214.69	46.32	26.5		291	58.72	3.91	8.35
158	18.11	203.64	7.01		126	7.93	23.67	4.46		171	214.32	46.94	27.34		291	59.22	4.06	8.05
158	19.44	202.12	7.64		126	8.48	24.05	4.7		171	214.72	46.76	26.62		291	59.45	4.3	8.89
158	19.54	201.63	6.4		175	57.01	2.58	17.53		171	214.79	47.12	27.47		291	58.87	2.8	7.5
158	19.25	201.59	7.37		175	58.04	2.55	18.98		171	214.36	47.26	25.71		291	59.47	4.39	7.53
158	18.49	202.92	7.53		175	56.69	3.02	16.77		171	214.28	46.89	24.85		291	58.88	1.62	7.87
158	17.35	203.78	7.65		175	58.37	2.13	20.45		171	214.28	47.09	25.93		291	59.55	3.69	7.57
158	19.34	202.37	7.51		175	59.33	1.48	18.67		171	214.35	46.75	25.54		291	59.94	3.76	7.64
158	19.27	202.57	8.45		175	58.51	1.49	18.5		171	214.9	46.27	27.07		291	59.62	4.34	6.99
158	19.73	201.73	7.89		175	58.2	1.65	18.55		171	214.76	46.37	26.42		291	59.8	4.37	7.09
158	19.31	201.47	7.36		175	58.25	1.78	17.61		171	215.34	45.89	27.53		291	60.54	5.25	8.06
158	18.71	201.94	6.71		175	59.47	1.17	18.55		171	214.71	45.45	28.77		291	59.88	5.14	7.77
158	18.73	202.1	6.43		175	57.14	2.42	16.63		171	214.68	44.72	30.79		291	60.24	5.69	6.92
158	19.25	201.96	6.2		175	59.35	2.04	17.76		171	214.4	44.18	32.94		291	59.88	4.67	5.7
158	19.66	201.62	6.77		175	60.54	1.79	19.5		171	213.93	45.28	33.01		291	59.91	3.98	6.05
158	19.52	201.8	6.41		175	57.8	2.05	14.41		171	214.4	45.3	32.53		291	59.17	2.39	5.92
158	18.94	202.04	5.15		175	58.65	2.51	17.36		171	214.76	45.4	30.71		291	59.4	2.27	6.12
158	17.42	203.33	6.69		175	58.77	3.35	16.13		171	214.68	45.5	31.1		291	59.95	3.09	6.28
158	17.13	202.82	5.56		175	58.55	5.38	16.53		171	214.63	44.13	33.14		291	60.65	6.33	6.29
158	16.42	203.51	5.4		175	58.91	3.66	15.45		171	215	47.09	30.69		291	60.34	6.3	7.43
158	16.43	203.96	6.29		175	58.22	3.72	13.57		171	214.79	47.5	29.47		291	60.33	5.38	6.86
158	16.69	203.27	6.06		175	59.49	3.48	15.02		171	214.99	47.34	31		291	60.16	3.3	7.39
158	16.37	203.88	6.14		175	59.71	4.47	15.7		171	215.58	47.77	29.55		291	59.63	2.92	7
158	14.34	205.47	6.69		175	61.07	3.01	14.22		171	215.59	47.08	31.47		291	60.02	4.56	6.77
158	14.11	204.95	6.4		175	60.03	5.01	15.13		171	215.47	47.34	30.4		291	60.12	4.94	6.3
158	15.72	203.76	6.55		175	60.24	4.4	15.71		171	215.47	47.38	30.34		291	59.46	2.92	5.53
158	16.88	202.82	7.67		175	59.65	5.49	15.55		171	215.57	47.66	28.48		291	59.96	4.37	6.71
158	17.41	202.17	7.64		175	61.08	4.9	16.69		171	215.92	48.31	29.25		291	60.41	4.89	5.92
158	18.65	202.07	7.6		175	59.88	5.28	14.56		171	215.6	47.55	27.13		291	60.67	5.5	5.18
158	18.79	202.32	7.9		175	60.58	4.36	15.23		171	215.35	47.49	29.23		291	60.66	5.02	4.22
158	17.43	204.02	7.22		175	59.93	5.37	14		171	214.95	46.86	29.3		291	60.13	2.36	4.78
158	15.59	204.54	7.81		175	60.8	4.45	14.27		171	215.41	47.31	28.5		291	60.42	2.23	4.59
158	15.04	205.17	7.58		175	60.23	6.13	13.9		171	215.04	47.2	28.28		291	60.16	3.37	5.48
158	16.39	203.29	8.11		175	60.12	6.49	13.94		171	215.43	46.95	28.29		291	60.24	3.43	4.53
158	17.67	202.23	8.82		175	61.23	5.72	13.71		171	215.31	46.63	27.99		291	60.27	2.58	4.53
158	17.39	202.3	8.76		175	61.23	5.62	11.66		171	215.8	46.49	27.63		291	60.06	3.06	5
158	19.31	200.74	9.84		175	61.12	6.08	11.69		171	215.67	46.62	27.9		291	60.41	3.67	3.76
158	18.56	202.42	7		175	61.33	5.28	9.01		171	215.95	46.76	27.32		291	60.18	2.78	4.24
158	17.87	202.95	8.53		175	62.74	4.51	12.05		171	216.42	46.74	26.56		291	60.11	4.44	4.7
158	16.13	203.6	8.6		175	62.58	4.06	9.72		171	216.16	47.13	27.32		291	60.33	3.27	4.29
158	15.67	204.6	6.15		175	61.66	5.76	9.4		171	216.07	47.27	28.97		291	60.73	3.06	3.17
158	16.41	203.22	6.22		175	61.89	6.72	8.13		171	216.71	46.76	27.46		291	60.03	3.08	4.97
158	16.57	203.32	6.12		175	63.02	5.06	10.65		171	217.11	46.75	27.37		291	59.98	3.24	4.35
158	18.3	203.12	7.37		175	61.93	5.65	9.23		171	216.49	47.04	28.15		291	59.61	2.9	4.01
158	18.31	203.58	7.14		175	61.63	7.17	7.1		171	216.55	46.78	27.96		291	60	4.08	5.53
158	17.91	203.16	7.4		175	62.95	4.79	9.58		171	216.5	46.57	27.61		291	60.12	3.57	4.56
158	18.24	202.76	6.64		175	63.04	5.4	8.98		171	216.56	46.73	27.52		291	60.15	4.29	4.32
158	18.5	203.27	7.58		175	62.95	4.88	9.17		171	216.54	47.39	27.85		291	60.42	4.26	5.22
158	16.65	204.26	7.54		175	61.56	5.87	8.06		171	216.66	47.55	26.24		291	60.62	6.31	4.15
158	17.12	203.51	7.41		175	62.58	4.69	9.65		171	216.73	47.56	26.29		291	60.15	6.39	3.8
158	18.72	202.87	7.36		175	62.51	6.64	8.71		171	216.75	46.61	30.05		291	60.55	6.97	4.34
158	19.7	202.23	7.93		186	150.35	245.73	17.29		171	216.58	48.04	26.04		291	60.47	7.33	4.66
158	19.95	202.37	9.07		186	147.57	246.18	17.85		171	215.86	48.66	26.88		291	60.19	7.82	3.47
158	18.84	203.16	7.9		186	144.81	244.33	16.72		171	215.07	48.81	27.56		291	60.91	8.01	5.84
158	19.46	203.46	7.33		186	143.85	243.65	18.6		171	215.71	48.36	28.05		291	61.59	8.98	5.13
158	17.22	203.38	5.61		186	142.39	242.34	18.35		171	216.71	48.29	23.8		291	62.31	9.43	4.13
158	16.06	203.68	6.38		186	141.16	242.05	19.22		171	216.99	48.28	24.14		291	61.73	6.61	6.13
158	15.14	203.91	6.35		186	140.89	241.41	19.09		171	216.63	47.89	23.96		291	61.56	5.56	5.7
158	14.82	204.18	5.61		186	140.3	240.8	18.77		171	217.18	47.57	24.46		291	62.39	6.69	6.07
158	13.61	204.53	5.49		186	139.03	237.96	19.52		171	217.55	48.12	23.53		291	61.33	5.5	5.42
158	13.51	204.47	5.39		186	139.1	238.13	22.06		171	217.42	47.93	25.45		291	61.41	6.35	5.09
158	13.45	204.03	6.96		191	83.84	211.63	3.47		171	217.65	47.89	25.91		291	60.62	6.29	6.48
158	12.65	203.95	5.48		191	82.4	210.9	3.3		171	218.1	47.71	27.16		291	61.18	6.39	4.62
158	13.67	203.31	5.63		191	81.62	211.05	2.58		171	218.08	47.75	27.3		291	61.04	5.27	9.74
158	14.19	203.04	6.09		191	83.68	211.25	3.29		171	217.71	48.28	27.86		291	60.98	6.4	9.83
158	14.21	203.26	7.31		196	104.77	192.48	3.7		171	217.95	47.66	25.59		291	60.7	7.21	11.25
158	14.29	202.69	5.79		196	105.76	188.02	3.73		171	218.17	47.42	25.17		291	60.83	7.06	11.99
158	14.48	203.3	6.08		196	107.23	188.47	2		171	218.12	47.53	24.91		291	61.32	8.27	11.79
158	15.52	203.16	7.09		196	103.85	188.31	2.81		171	218.03	48.06	22.88		291	60.83	9.45	12.36
158	15.92	203.14	6.31		199	239.07	177.82	4.95		171	218	47.87	24.6		291	60.22	9.52	9.71
158	14.37	203.74	6.37		199	238.35	177.62	5.45		171	217.83	47.94	24.89		291	60.2	10.03	10.22
158	13.23	203.54	6.92		202	10.71	49.3	17.07		171	217.46	47.86	25.09		291	60.51	10.08	11.31
158	11.55	204.45	6.43		202	9.54	48.29	16.37		171	217.93	48.3	23.67		291	60.24	9.72	10.91
158	12.36	204.49	7.87		205	138.66	227.95	16.49		171	218.29	48.56	23.28		291	61.11	9.78	12.17
158	11.59	205.09	8.1		205	139.21	227.9	18.83		171	217.89	48.23	22.15		291	61.76	9.02	10.41
158	12.38	204.63	6.3		208	140.3	128.83	10.56		171	217.87	47.78	22.74		291	62.04	8.5	11.27
158	13.38	204.2	6.28		208	139.18	128.04	11.8		171	217.39	47.61	22.81		291	62.79	8.63	13.35
158	13.34	204.29	5.63		212	110.86	229.77	10.43		171	217.45	47.61	23.37		291	61.87	7.37	10.23
158	12.75	204.65	5.17		212	111.39	229.76	9.91		171	216.98	47.4	23.89		291	62.43	6.41	7.6
158	11.8	204.76	6.74		212	112.31	229.78	7.76		171	216.52	47.26	23.85		291	61.95	6.14	8.91
158	12.62	204.21	6.81		215	174.5	197.7	18.07		171	217.04	47.15	24.05		291	61.18	5.38	7.21
158	11.97	204.74	5.28		215	175.29	197.9	17.74		171	217.08	47.22	23.52		291	61.21	5.14	7.47
158	13.05	204.38	6.64		218	48.13	111.04	2.28		171	217.03	47.3	23.41		291	61.21	5.28	7.91
158	12.82	204.52	6.33		218	48.24	110.76	1.27		171	217.07	47.36	24.84		291	61.75	4.71	7.87
158	13.15	204.38	5.79		223	36.52	146.31	13.98		171	217.52	47.17	23.22		291	61.99	5.65	8.28
158	14.12	204.06	5.71		223	34.94	146.54	13.21		171	217.12	47.13	25.12		291	62.14	5.62	9.27
158	15.26	203.49	5.14		223	36.42	147.6	13.52		171	217.13	47.03	23.13		291	60.52	6.54	6.78
158	14.61	203.42	5.78		223	34.65	145.79	14.88		171	217.21	47.52	24.61		291	60.14	6.71	7.13
158	14.19	203.53	5.6		226	161.17	208.8	32.31		171	216.85	47.78	22.97		291	59.89	6.26	7.43
158	14.41	203.36	5.96		226	159.36	208.27	31.16		171	216.14	47.21	25.27		291	59.83	6.89	7.34
158	14.79	203.67	6.49		266	70.78	201.2	9.25		171	216.49	47.67	23.78		291	59.82	6.83	6.84
158	15.57	203.59	5.85		266	73.73	202.61	7.4		171	216.32	47.99	25.53		291	60.12	7.28	10.2
158	16.64	203.05	6.81		266	73.26	202.38	8.17		171	216.6	48.84	23.95		291	59.78	8.99	15.35
158	15.45	203.09	7.58		266	73.38	203.3	8.45		171	216.38	48.85	25.6		291	59.49	9.41	16.3
158	13.89	203.39	7.22		266	73.35	203.51	7.85		171	216.54	48.76	24.66		291	59.83	9.6	15.22
158	13.82	203.5	6.83		266	73.49	202.24	8.67		171	216.32	48.66	25.47		291	59.81	9.47	15.35
158	13.48	203.33	7.28		266	73.07	201.75	9.29		171	216.72	48.72	25.14		291	59.69	9.91	14.89
158	13.07	203.71	6.85		266	72.76	201.73	9.5		171	216.13	48.66	25.96		291	59.85	9.42	16.05
158	12.27	204.34	6.55		266	72.05	201.81	8.92		171	216.07	48.67	24.34		291	59.16	9.65	16.31
158	11.8	203.96	6.5		266	72.49	201.61	7.87		171	216.26	48.28	25.39		291	58.65	9.38	15.06
158	11.02	204.12	5.91		266	72.52	201.19	10.2		171	215.87	48.15	24.7		291	58.37	9.47	15.89
158	10.38	204.24	4.55		266	73.15	202.52	6.57		171	216.5	48.53	22.48		291	59.35	9.61	15.04
158	11.61	203.42	6		266	74.02	202.85	7.73		171	215.69	48.27	24.2		291	59.19	10.06	14.53
158	12.62	203.5	4.89		266	74.51	202.14	8.53		171	216.19	48.38	24.66		291	60.22	8.42	15.85
158	14.3	203.21	5.88		266	75.52	202.85	8.87		171	216.29	48.53	23.56		291	59.09	7.51	13.46
158	15.55	203.18	6.13		266	75.27	202.88	7.74		171	216.16	48.54	23.2		291	58.4	8.18	14.43
158	14.61	203.35	5.45		266	75.16	204.51	7.1		171	216.55	48.26	25.56		291	58.46	8.46	15.18
158	14.66	203.29	6.16		266	75.17	203.13	8.86		171	216.56	48.42	23.91		291	58.14	8.26	15.3
316	231.49	211.71	11.62		266	75.17	203.34	9.39		171	216.57	48.07	23.03		291	58.02	8.09	14.35
316	229.95	211.32	11.25		266	74.68	203.71	9.25		171	217.03	47.9	23		291	59.59	7.42	14.5
316	230.05	211.49	10.24		266	74.98	204.68	8.4		171	215.88	47.82	16.05		291	59.84	7.87	13.18
316	228.86	211.18	11.93		266	74.13	204.11	8.97		171	216.07	46.73	22.81		291	59.8	7.62	12.71
316	228.64	210.51	14.74		266	72.91	204.78	8.3		171	216.54	47.26	25.25		291	60.19	7.55	13.58
316	228.32	209.85	14.64		266	72.87	204.94	8.45		171	216.69	47.83	28.78		291	59.72	7.72	14.51
316	228.55	209.05	12.59		266	73.11	205.91	9.05		171	217.2	47.54	27.03		291	60.1	7.56	13.03
316	228.1	209.45	16.25		266	73.61	206.61	8.75		171	217.09	47.7	26.98		291	60.14	7.7	13.08
316	228.23	209.89	15.25		266	73.95	206.67	7.89		171	216.76	47.44	27.14		291	60.16	8.06	13.97
316	228.3	210.26	14.1		266	75.04	208.13	7.98		171	217.45	47.71	26.06		291	60.23	7.37	12.29
316	228.64	210.11	13.89		266	74	209.66	5.26		171	217.35	48.15	26.36		291	60.21	7.3	12.56
316	228.71	211.61	13.73		266	74.69	209.28	4.78		171	217.31	47.65	26.51		291	61.02	7.35	12.72
316	228.29	210.97	14.17		266	74.82	209.11	2.29		171	217.07	47.65	25.55		291	60.74	7.19	13.05
316	227.55	210.63	14.05		266	74.91	208.97	3.09		327	149.05	51.05	15.47		291	60.66	7.83	14.81
316	228.19	211	12.53		266	75.43	210.24	2.43		327	148.31	49.86	15.85		291	60.79	7.74	15.46
316	227.57	211.73	14.13		266	76.41	210.7	2.3		327	148.38	49.17	16.15		291	60.92	7.89	15.44
316	226.74	211.23	14.92		266	76.83	210.31	3.38		327	147.99	49.77	16.22		291	60.89	7.8	14.55
316	227.06	210.63	14.02		266	77.31	210.03	2.36		327	148.03	48.83	16.56		291	61.67	7.73	15.02
316	226.64	209.77	13.16		266	77.99	210.06	3.51		327	147.67	47.54	15.93		291	61.65	7.7	15.04
316	225.21	210.18	12.76		266	77.17	209.64	2.2		327	147.26	46.42	16.53		291	62.59	7.93	15.3
316	225.36	210.92	13.27		266	79.13	209.67	3.38		327	147.53	44.75	17.88		291	63.33	8.28	13.82
316	226.37	210.73	13.39		269	10.97	49.1	16.52		327	147.74	40.82	18.36		291	63.36	8.2	13.71
316	226.01	209.6	13.06		269	11.36	48.98	16.26		327	148.44	40.1	17.8		291	63.12	8.78	15.81
316	226.95	209.46	13.31		272	137.92	227.28	16.49		327	149.29	39.23	17.48		291	63.26	8.9	14.84
316	226.5	209.58	15.44		272	137.88	228.76	16.77		327	150.78	35.34	18.01		291	62.99	8.91	15.7
316	225.66	208.15	14.21		275	104.47	119.21	5.15		327	152.23	30.41	18.51		291	64.53	8.15	13.39
316	226.24	209.38	13.73		275	105.1	118.25	4.95		327	152.75	28.4	19.16		291	64.37	8.49	13.41
316	226.08	208.71	15.08		278	239.31	177.94	4.21		327	153.75	28.27	18.29		291	60.38	8.97	13.12
316	225.21	207.48	14.1		278	236.52	176.75	6.22		327	154.76	27.7	20.1		291	59.81	9.47	12.67
316	225.06	206.99	14.67		283	109.97	163.5	19.35		327	154.37	29.12	20.21		291	58.86	10.1	12.35
316	225.37	207.37	13.97		283	109.38	162.94	18.07		327	154.67	29.03	20.55		291	59.03	10.1	12.56
316	225.17	207.09	15.49		283	110.22	163.41	16.71		327	153.9	30.17	18.25		291	58.67	10.54	14.81
316	225.24	208.02	14.17		283	110.05	163.29	16.36		327	153.2	32.29	20.71		291	59.37	10.97	13.28
316	224.7	207.49	15.47		286	161.27	210.07	31.79		327	153.18	35.18	20.57		291	59.3	11.01	13.9
316	224.01	205.9	15.36		286	162.44	208.48	29.64		327	152.3	37.63	21.38		291	59.45	11.01	14.35
316	223.52	205.27	15.17		293	11.88	48.76	15.8		327	151.65	40.41	21.42		291	59.61	11.11	15.03
316	222.96	204.44	12.63		293	12.5	49.33	16.02		327	151.38	42.47	21.76		291	59.36	10.86	14.04
316	224	204.53	11.35		293	12.31	49.27	16.68		327	149.56	45.06	22.23		291	59.31	10.87	13.65
316	224.94	205.25	9.87		293	11.68	48.4	15.3		327	148.55	46.18	22.37		291	59.5	11.42	13.97
316	224.74	205.63	9.81		293	13.5	49.67	16.43		327	147.24	46.8	21.61		291	59.03	11.08	13.64
316	225.15	205.55	10.53		293	11.92	48.12	14.37		327	147.32	46.75	17.94		291	59.53	10.95	12.83
316	225.77	205.77	10.08		298	135.67	226.27	18.38		327	147.89	47.33	19.38		291	59.46	10.61	14.28
316	226.39	206.62	7.74		298	137.4	227.57	17.18		327	147.82	46.06	20.06		291	59.07	11.48	12.5
316	227.13	206.44	8.42		298	136.94	226.33	16.59		327	148.96	45.28	21.28		291	59.9	11.47	11.72
316	227.09	206.39	7.83		298	137.28	225.57	15.81		327	149.97	44.01	22.15		291	60.22	11.12	12.43
316	227.03	206.14	8.37		303	104.36	193.8	5.59		327	150.04	42.84	21.38		291	60.19	10.5	12.14
316	228.15	206.39	8.03		303	105.44	192.43	3.83		327	150.29	42.43	22.76		291	60.49	10.36	11.62
316	228.38	206.74	7.75		303	104.23	188.43	3.97		327	150.28	43.23	22.51		291	61.5	9.82	12.09
316	228	206.57	7.84		303	107.07	188.34	2.57		327	149.66	42.23	25.03		291	61.03	9.67	13.46
316	229.77	207.02	8.07		310	28.98	145.4	14.49		327	148.96	43.01	22.56		291	60.49	10.19	12.55
316	229.71	206.55	7.85		310	30.52	145.96	14.18		327	148.89	42.69	23.73		291	60.67	10.61	11.88
316	230.61	205.98	8.58		310	30.96	146.41	11.41		327	149.18	42.69	21.51		291	59.77	10.99	12.51
316	231.06	205.69	7.99		310	34.33	145.72	11.98		327	148.68	43.2	21.42		291	60.31	10.28	12.96
316	232.15	205.82	9		310	32.35	146.19	12.39		327	148.99	42.51	21.14		291	60.13	10.26	11.95
316	233.41	206.48	8.72		310	35.86	146.74	12.46		327	149.28	43.99	22.31		291	60.64	10.31	12
316	234.18	206.92	9.05		315	137.77	128.4	13.31		327	150.07	44.57	23.43		291	61.45	9.92	12.82
316	235.25	206.92	9.57		315	137.34	129.59	11.91		327	150.15	44.75	22.66		291	61.3	10.13	12.35
316	235.11	206.68	9.07		315	139.53	130.4	12.07		327	150.06	44.75	23.39		291	61.87	9.98	13.2
316	234.92	206.62	9.3		315	137.12	129.54	11.33		327	150.75	45.04	22.57		291	61.99	9.6	12.45
316	234.51	205.96	9.2		318	160.49	210.46	33.29		327	150.5	44.06	24.47		291	61.81	9.99	11.6
316	234.51	205.3	8.42		318	159.05	210.83	33.76		327	150.94	42.6	24.57		291	61.35	9.78	12.04
316	235.03	205.04	8.35		326	149.48	251.29	22.95		327	149.61	41.35	26.28		291	61.79	9.68	13.33
316	235.38	205.24	8.06		326	149.23	250.97	21.93		327	149.32	40.33	26.44		291	61.62	9.88	12.27
316	235.16	205.36	7.36		326	149.55	251.21	18.5		327	149.87	40.12	25.24		291	61.55	9.98	11.36
316	234.94	205.79	7.22		326	148.82	250.93	19.93		327	149.21	40.28	25.47		291	60.96	9.85	11.01
316	234.8	205.18	6.36		326	149.18	250.4	17.63		327	148.93	40.87	25.81		291	62	9.62	11.98
316	234.84	204.24	6.81		326	149.08	250.51	17.29		327	149.5	40.22	26		291	62.93	9.17	12.03
316	234.58	203.79	8.27		326	148.43	251.08	17.87		327	149.71	40.22	26.29		291	62.13	9.6	11.87
316	234.94	202.86	6.99		329	58.91	9.11	7.99		327	149.23	40.96	27.78		291	62.36	9.59	10.9
316	235.41	203.35	9.07		329	58.69	6.74	5.98		327	149.19	40.58	26.41		291	61.95	9.86	14.66
316	234.73	201.56	7.86		346	135.27	225.27	25.1		327	149.14	40.2	27.85		291	61.76	9.75	11.5
316	233.87	201.64	7		346	135.04	225.4	25.99		327	149.56	40.02	26.82		291	62.39	9.48	10.29
316	233.9	200.65	8.44		346	133.94	224.91	26.63		327	150.7	39.51	27.88		291	61.53	9.72	11.21
316	233.84	200.4	7.55		346	135.84	224.94	26.47		327	151.14	39.04	25.61		291	62.38	9.75	11.95
316	233.74	201.13	8.01		346	135.31	224.79	25.98		327	152.23	38.25	25.05		291	62.56	10.09	12.08
316	233.4	201.45	9.23		346	135.54	225.92	25.16		327	153.52	38.13	25.15		291	62.48	9.81	11.78
316	233.22	201.65	8.46		346	135.65	225.81	25.66		327	153.42	38.6	26.67		291	62.35	8.99	11.7
316	233.04	202.14	10.03		346	135.33	225.46	25.15		327	153.42	37.86	27.63		291	63.37	8.37	11.24
316	231.73	202.31	11.1		346	135.35	224.92	24.95		327	153.46	38.03	27.49		291	63.25	8.11	13.54
316	232.47	201.94	9.96		346	135.71	225.3	24.67		327	153.63	37.56	27.82		291	62.75	8.59	11.3
316	231.06	203.24	10.33		346	135.85	225.91	24.11		327	153.81	37.66	26.54		291	61.78	8.69	11.13
316	234.04	203.2	9.04		346	135.56	226.06	22.73		327	153.16	38.08	25.41		291	62.01	8.23	11.63
316	234.18	202.5	8.56		346	135.67	226.6	21.95		327	153.04	39.26	24.47		291	61.84	8.27	12.13
316	234.46	202.27	7.95		346	135.55	226.88	21.81		327	153.25	38.59	25.4		291	61.77	7.91	12.59
316	234.96	203.26	7.28		346	136.41	227.11	19.15		327	153.15	38.36	24.57		291	61.28	8.36	12.73
316	235.57	203.87	9.04		346	135.8	226.13	17.44		327	152.51	40.34	24.22		291	60.58	8.88	12.1
316	235.15	204.12	8.62		349	105.86	193.07	8.04		327	152.34	41.1	24.54		291	61.04	8.48	11.81
316	234.14	202.72	8.44		349	104.92	192.45	4.25		327	153.24	41.03	24.85		291	60.71	8.92	11.02
316	233.17	201.84	8.1		353	137.41	128.36	18.6		327	153.28	40.95	23.97		291	60.58	9.3	11.79
316	233.21	201.69	8.16		353	137.57	128.28	17.71		327	153.32	40.31	23.7		291	61.05	9.22	13.08
316	232.63	200.96	8.22		353	137.72	129.5	14.73		327	152.78	40.1	24.01		291	60.6	8.96	11.02
316	231.74	201.01	8.7		358	13.23	47.32	22.64		327	152.74	40	24.5		291	60.73	9.1	11.9
316	231.43	200.95	8.55		358	12.24	47.33	20.81		327	153.06	40.47	23.31		291	61.22	8.38	11.66
316	231.84	201.31	7.72		358	12.74	48.41	21.03		327	153.2	41.03	23.26		291	60.81	8.95	11.44
316	232.16	201.9	8.44		358	12.18	47.3	19.93		327	152.86	41.15	23.71		291	60.83	8.41	11.62
316	232.57	201.93	8.57		363	90.67	83.09	11.69		327	152.6	40.95	21.48		291	60.97	8.38	12.01
316	230.91	200.98	8.65		363	90.75	84.38	11.2		327	152.71	40.48	22.01		291	61.07	8.63	13.59
316	231.29	200.53	9		363	89.82	83.77	11.62		327	153.17	40.68	20.34		291	60.9	8.06	11.19
316	231.23	199.81	10.23		363	91.41	83.6	10.29		327	153.08	40.43	19.92		291	60.73	8.36	11.94
316	231.49	200	9.85		366	130.1	155.22	11.3		327	152.38	40.21	18.25		291	60.51	8.48	11.58
316	231.8	200.27	10.71		366	131.41	154.26	12.96		327	152.34	39.66	19.62		291	60.57	8.46	11.88
316	232.85	201.18	10.37		405	83.99	138.21	5.16		327	152.4	39.58	20.5		291	60.24	8.49	10.7
316	232.27	201.29	8.57		405	83.84	138.55	4.27		327	152.32	40.82	19.55		291	60.36	7.91	11.26
316	232.38	201.16	8.27		405	84.48	140.21	4.25		327	152.27	41.21	21.04		291	60.99	7.3	11.73
316	231.57	200.55	7.74		405	84.43	141.06	2.73		327	152.15	40.53	19.89		291	60.3	7.97	11.68
316	231.89	199.8	7.3		405	84.15	142.16	3.7		327	152	40.58	20.23		291	60.57	7.05	9.98
316	232.16	200.21	8.08		405	85.14	143.98	2.83		327	152.08	40.47	19.09		291	61.19	6.55	10.26
316	231.88	200.44	6.85		405	85.14	144.67	2.74		327	151.97	40.86	20.48		291	60.6	7.27	11.91
316	233.07	199.81	7.25		405	84.65	145.44	3.46		327	151.99	40.42	21.22		291	61.25	7.19	9.54
316	233.61	199.83	7.49		405	85.26	145.75	2.01		327	152.17	39.84	21.35		291	60.73	6.65	12.95
316	233.24	200.4	6.73		405	85.81	146.42	1.62		327	152.59	40.3	22.46		291	60.62	7.44	11.67
316	232.17	200.23	7.4		405	85.32	145.96	2.16		327	152.69	40.5	22.12		291	60.79	6.93	10.89
316	232.02	200.33	7.29		405	85.27	146.07	2.47		327	152.33	39.98	22.25		291	60.62	7.61	11.46
316	232.88	200.35	7.2		405	85.47	145.92	2.73		327	152.51	39.98	21.81		291	61.21	7.01	10.85
316	233.74	200.48	7.57		405	85.67	146.36	2.7		327	152.45	40.08	21.06		291	61.46	8.08	13.26
316	233.86	201.48	8.38		405	84.81	146.66	2.7		327	152.28	39.42	20.5		291	62.76	8.29	14.14
316	235.03	200.91	9.61		405	85.69	146.51	2.5		327	151.95	39.46	20.58		291	61.78	8.73	13.52
316	234.59	198.66	9.04		405	85.14	146.62	3.29		327	151.78	40.1	20.98		291	63.28	8.31	11.14
316	234.26	196.81	9.35		405	85.84	147.3	3.56		327	151.39	39.57	20.34		291	60.28	9.33	15.11
316	233.22	194.09	9.54		405	86.41	148.69	4.06		327	152.11	40.01	21.01		291	59.78	9	11.76
316	233.8	193.6	9.7		405	86.37	148.39	3.12		327	151.45	39.49	18.55		291	60.39	9.87	12.92
316	233.21	194.22	10.17		405	86.17	148.59	3.73		327	151.5	39.78	17.47		291	58.98	9.62	13.67
316	232.88	193.97	10.2		405	86.07	149	3.24		327	150.99	38.93	18.8		291	59.31	9.29	12.29
316	232.28	194.06	9.5		405	85.7	148.53	3.37		327	151.02	39.41	18.88		291	57.19	8.79	12.42
316	232.2	193.91	9.47		405	85.36	148.8	4.13		327	151.59	40.01	20.07		291	56.73	6.52	13.85
316	231.62	192.45	7.99		405	85.3	149.11	4.81		327	151.64	40.39	19.45		291	55.99	7.53	13.25
316	232.42	193.69	8.18		405	85.12	149.19	3.18		327	151.82	40.73	19.38		291	56.84	7.52	13.2
316	233.56	196.12	8.38		405	85.78	149.78	4.1		327	152.13	40.8	19		291	56.6	7.3	13.08
316	234.34	199.15	8.17		405	85.58	150.34	4.71		327	151.95	41.02	19.25		291	56.65	6.86	12.2
316	234.18	200.24	7.9		405	85.71	151.32	4.86		327	152.37	41.03	18.63		291	56.87	6.87	12.41
316	234.02	199.72	10.01		405	84.82	150.97	3.51		327	152.1	41.07	19.67		291	57.38	6.58	12.9
316	234.24	200.23	9.01		405	85.7	151.25	5.25		327	152.84	41.4	18.35		291	56.36	6.94	14.44
316	234.18	202.62	8.49		405	86.07	152.23	3.59		327	152.18	41.76	18.94		291	56.08	6.48	11.57
316	233.57	201.45	7.91		405	85.8	152.56	3.54		327	152.66	41.76	19.37		376	67.68	39.61	8.5
316	233.32	199.77	7.2		405	86.42	151.85	3.12		327	152.5	41.76	20.48		376	69.06	39.6	8.18
316	232.94	198.97	8.57		405	86.81	151.83	3.39		327	152.26	42.35	18.49		376	67.47	40.94	8.14
316	232.92	200.61	8.58		405	87.08	151.66	3.63		327	152.69	42.47	19.57		376	68.36	40.26	8.08
316	233.54	199.79	8.97		405	87.93	153.34	2.2		327	152.99	42.69	19.35		376	66.93	40.64	6.6
316	233.67	199.2	8.71		405	87.32	150.93	2.28		327	152.95	42.75	20.42		376	66.18	41.38	7.19
316	233.54	200.13	7.81		465	23.08	137.44	33.24		327	152.76	42.69	19.72		376	64.04	42.03	7.39
316	233.89	200.85	7.77		465	23.01	137.02	33.03		327	153.39	43.28	18.53		376	61.74	41.19	4.95
316	233.75	199.35	8.81		465	22.49	137.32	31.14		327	152.75	43.11	20.62		376	61.89	42.41	5.73
316	232.9	196.97	10.01		465	22.06	137.92	30.77		327	152.91	42.93	19.35		376	62.37	42.13	5.33
316	232.51	193.43	10.82		465	21.9	137.18	27.12		327	153.18	42.94	19.84		376	65.54	41.19	6.82
316	231.58	190.55	10.72		465	22.55	137.56	25.93		327	153.2	42.99	19.04		376	63.06	41.99	5.46
316	231.34	190.39	11.66		465	21.86	137.82	26.38		327	153.17	43.34	19.88		376	64.2	42.04	7.67
316	231.25	189.93	9.25		465	21.72	137.89	26.75		327	153	43.49	20.47		376	62.23	42.65	5.39
316	231.84	190.65	8.86		465	21.67	138.22	24.53		327	152.67	43.33	19.78		376	62.24	42.15	5.7
316	232.83	192.23	7.6		465	22.27	138.4	23.74		327	152.64	43.8	17.73		376	61.72	42.33	6.01
316	233.65	195.39	7.55		465	21.35	138.22	24.14		327	151.99	43.58	18.8		376	60.46	42.64	5.64
316	232.81	196.38	7.71		465	21.47	138.46	23.35		327	153.08	44.29	19.9		376	60.51	41.79	5.91
316	232.94	197.31	7.31		465	21.37	138.25	24.08		327	153.51	43.45	18.7		376	62.04	42.27	6.08
316	232.46	198.94	7.76		465	21.15	138.46	22.75		327	153.21	44.22	18.08		376	62.57	42.41	6.35
316	232.93	201.06	6.29		465	22.17	138.34	23.79		327	153.11	43.92	20.04		376	62.37	42.6	6.39
316	232.69	201.47	7.2		465	22.43	138.68	23.55		327	153.22	44.11	18.64		376	62.5	42.45	6.09
316	232.96	202.31	6.18		465	22.16	139.2	23.79		327	153.27	43.72	19.02		376	63.75	42.49	5.91
316	232.51	201.69	6.93		465	22.09	138.88	22.65		327	152.84	44.36	18.11		376	64.3	42.04	7.62
376	92.26	18.69	29.58		465	21.91	139.04	22.95		327	151.96	44.61	11.63		376	63.07	43.19	6.94
376	92.71	19.12	27.87		465	22.05	139.44	23.37		327	152.52	43.99	18.12		376	65.55	42.97	10.28
376	92.56	16.19	31.36		465	22.62	139.51	22.69		327	152.89	43.38	21.03		376	63.08	41.45	5.84
376	92.49	14.6	31.41		465	22.15	139.41	22.4		327	153.3	43.85	21.75		376	63.39	41.15	6.85
376	93	14.07	31.82		465	22.91	140.32	22.46		327	153.01	44.07	22.57		376	64.53	41.27	7.86
376	93.14	13.05	30.72		465	22.3	139.36	21.61		327	152.83	43.85	22.04		376	65.37	39.98	6.45
376	93.43	12.47	31.88		465	22.8	139.86	22.03		327	153.73	43.61	21.35		376	62.76	42.78	6.53
376	94.62	11.26	31.3		465	22.82	140.46	21.12		327	153.07	43.99	22.23		376	64.04	41.1	7.54
376	94.55	11.72	30.71		465	23.41	140.25	22.55		327	153.38	44.43	21.21		376	64.99	40.99	6.84
376	95.16	12.47	30.77		465	23.75	140.5	22.27		327	153.04	44.51	21.69		376	64.69	40.01	6.83
376	94.63	13.83	32.1		465	23.78	141.04	22.85		327	153.49	43.95	21.21		376	65.38	40.25	8.71
376	91.36	15.14	32.69		465	24	140.19	23.1		472	31.55	262.69	3.41		376	64.63	40.74	6.54
376	90.68	13.09	34.29		465	24.05	140.95	22.54		472	31.71	262.3	3.19		376	63.9	40.17	7.41
376	91.03	12.53	32.06		465	24.23	140.98	22.35		472	31.79	262.83	3.19		376	64.14	40.01	6.69
376	91.1	14.75	34.3		465	24.11	140.47	23.27		472	31.62	262.31	4.52		376	64.51	40.28	7.44
376	91.16	14.43	31.73		465	24.18	140.63	21.81		472	31.5	261.99	4.75		376	63.38	39.92	6.94
376	92.29	15.02	34.39		465	24.68	141.73	21.95		472	31.34	261.89	4.21		376	62.56	40.28	5.61
376	95.09	17.2	33.79		465	24.8	141.44	22.45		472	31.21	261.22	5.77		376	63.47	39.34	7.55
376	92.61	19.69	34.47		465	24.95	141.7	20.98		472	30.75	260.81	3.67		376	63.12	40.29	6.61
376	92.05	22.25	31.58		465	25.47	141.1	20.8		472	31.36	260.98	6.11		376	62.94	39.68	5.85
376	91.18	20.31	31.93		465	24.91	141.68	20.37		472	30.92	260.89	5		376	63.19	40.1	6.64
376	91.55	20.77	34.77		465	25.31	141.24	22.76		472	31.08	260.58	5.79		376	63.18	39.11	6.43
376	92.06	22.61	31.3		465	25.47	141.69	21.51		472	31.29	260.33	5.36		376	63.39	39.08	7.55
376	96.37	21.37	33.72		465	25.53	142.37	21.53		472	31.17	259.55	4.7		376	63.65	39.17	7.34
376	96.32	22.81	33		465	25.3	142.42	18.83		472	31.47	258.88	6.43		376	62.7	39.89	6.76
376	94.7	25.63	32.09		465	25.79	142.62	19.2		472	30.9	258.38	7.27		376	63.72	39.77	7.25
376	95.23	26.86	31.07		465	25.47	142.54	20.17		472	30.44	258.78	5.94		376	63.76	39.54	8.11
376	95.11	28.71	27.37		465	25.93	142.38	20.26		472	29.66	257.99	4.07		376	62.94	40.5	5.98
376	95.35	29.02	27.15		465	26.76	143.1	19.43		472	29.38	258.57	4.94		376	63.77	40.17	8.37
376	95.6	31.87	20.2		465	27.11	142.99	20.32		472	28.55	258	5.89		376	63.73	39.76	6.96
376	94.69	33.35	27.72		465	26.27	143.58	20.44		472	29.44	258.27	4.73		376	62.79	40.05	5.77
376	94.69	34.52	23.14		465	27.56	143.51	21.03		472	28.75	258.63	7.1		376	63.34	39.1	7.34
376	94.22	35.14	24.25		465	27.71	144.3	19.7		472	28.65	259.03	9.15		376	62.81	39.77	5.96
376	94.55	34.7	19.16		465	27.7	144.32	18.6		472	28.68	259.86	8.87		376	63.27	38.99	6.17
376	94.8	34.97	24.93		465	27.84	144.38	19.38		472	29.62	260.54	7.8		376	62.64	39.82	6.35
376	96.72	33.83	19.17		465	28.45	144.53	18.03		472	29.18	260.4	8.5		376	63.06	39.22	5.64
376	98.15	36.54	17.72		465	27.68	144.87	19.68		472	29.22	260.9	8.52		376	62.74	39.6	6.13
376	96.39	39.37	16.4		465	28.96	145.5	19.39		472	28.63	260.51	8.62		376	63.1	38.52	6.2
376	94.49	42.81	20.95		465	27.78	145.53	18.35		472	28.75	261	8.4		376	63.54	39.52	6.62
376	94.05	42.48	17.78		465	29.44	145.68	17.09		472	26.41	260.95	8.51		376	63.39	39.46	5.63
376	93.62	45.15	22.1		465	28.7	146.11	18.79		472	26.06	260.75	8.86		376	64.49	39.3	7.38
376	93.09	45.14	23.78		482	157.2	245.76	29.95		472	24.85	260.56	9.67		376	63.7	39.24	6.67
376	93.06	46.2	23.2		482	154.18	246	26.86		472	25.91	260.61	11.2		376	64.96	39.41	6.79
376	93.61	46.28	26.3		482	155.02	247.58	26.32		472	24.74	259.96	8.82		376	65.03	39.98	8.16
376	94.03	44.96	25.68		482	149.4	246.49	26.44		472	24.34	260.51	9.88		376	65.3	39.07	6.91
376	93.98	46.71	26.17		482	148.1	247.47	27.32		472	24.1	260.88	9.26		376	65.09	39.28	6.92
376	93.84	47.04	25.4		482	150.34	249.01	26.72		472	24.24	260.66	10.25		376	64.9	39.85	6.33
376	94.21	48.47	25.72		482	151.41	250.17	26.72		472	24.83	261.58	11.43		376	67.41	38	9.2
376	97.24	52	22.41		482	150.06	249.86	24.16		472	24.47	260.89	11.04		376	64.73	39.12	5.12
376	97.95	53.43	20.21		482	151.01	250.56	23.52		472	23.84	261.5	10.9		376	66.11	38.57	6.16
376	97.26	53.7	20.58		482	151.34	251.34	23.35		472	23.27	260.99	10.21		376	66.41	38.48	6.19
376	96.64	51.84	19.65		482	151.3	250.71	23.67		472	22.53	261.12	10		376	67.01	38.4	7.29
376	95.64	52.09	18.05		482	151.3	250.81	23.22		472	21.39	261.49	11.51		376	66.11	38.68	6.71
376	97.88	54.94	18.32		482	152.01	251.39	23.54		472	21.39	261.87	11.53		376	67.33	38.12	6.54
376	99.15	55.71	17.79		482	152.53	251.6	23.04		472	21.43	262.29	12.18		376	67.35	38.03	6.75
376	99.03	54.36	17.2		482	153.23	251.62	23.13		472	21.31	262.13	12.65		376	67.77	37.45	6.77
376	99.4	54.89	15.61		482	153.85	251.53	20.89		472	21.12	261.65	12.4		376	67.73	38.11	7.84
376	99.99	54.77	16.69		489	105.4	192.75	9.71		472	20.78	261.75	12.33		376	67.23	37.66	6.98
376	98.95	54.6	17.3		489	103.55	192.01	8.29		472	21.1	260.61	13.2		376	67.8	37.02	6.79
427	24.96	13.48	11.66		489	104.45	191.37	9.24		472	20.91	260.93	13.73		376	68.13	38.44	6.71
427	24.55	13.52	10.84		489	104.15	189.16	8.41		472	20.97	260.9	10.78		401	43.14	201.51	3.16
427	24.57	14.37	13.55		489	106.77	192.33	8.47		472	20.81	261.19	10.84		401	39.41	205.23	3.58
427	24.11	13.48	12.18		489	105.92	190.72	7.95		472	20.1	261.56	9.44		401	38.6	204.53	3.57
427	24.62	13.87	10.2		492	244.83	240.68	4.09		472	18.1	262.97	10.85		401	38.33	203.98	3.08
427	23.59	13.88	13.05		492	246.42	240.23	3.87		472	16.3	262.86	10.59		401	38.19	203.69	4.08
427	24.29	14.13	11.57		511	108.63	107.91	7.12		472	16.79	263.91	10.22		401	38.3	203.85	3.77
427	24.68	12.63	10.75		511	109.05	108.16	7.64		472	16.58	264.08	9.91		401	35.56	207.39	4.02
427	24.53	15.01	12.69		511	108.46	108.15	9.26		472	16.47	264.46	9.5		401	35.71	207.17	4.01
427	24.42	14.2	13.63		511	109.65	108.85	5.98		472	16.14	264.09	9.53		401	37.81	203.3	3.77
427	25.45	14.66	10.77		511	108.47	108.91	7.56		472	15.83	264.03	9.6		401	37.8	203.37	3.3
427	24.47	14.98	13.8		511	110.14	109.04	7.5		472	15.63	263.78	8.67		401	35.41	207.28	3.13
427	24.21	15.42	16.13		511	108.99	109.3	7.07		472	15.28	263.34	9.09		401	37.59	203.4	3.48
427	24.23	14.21	14.27		511	107.92	111.64	7.6		472	15.67	263.55	8.67		401	37.58	203.85	3.83
427	25.32	13.33	11.21		511	107.39	112.56	7.2		472	15.06	262.5	9.06		401	35.64	208.8	2.6
427	24.13	14.75	12.38		511	104.49	113.77	9.53		472	15.09	263.26	9.41		401	35.28	208.8	3.08
427	24.57	13.75	15.08		511	104.05	114.91	10.23		472	14.27	263.01	8.17		401	35.95	209.39	2.39
427	23.84	15.06	13.78		511	103.99	114.72	8.19		472	14.16	263.22	9.07		401	35.66	209.88	3.03
427	25.04	14.2	10.55		511	104.57	115.17	6.88		472	15.23	262.77	8.07		401	35.69	209.54	3.06
427	23.98	14.35	11.68		511	103.95	116.12	8.03		472	16.82	257.23	7.06		401	36.07	210.51	2.54
427	24.42	14.47	12.87		511	103.35	116.4	9.61		472	16.71	257.61	7.87		401	36.1	209.93	2.41
427	24.08	14.36	13.28		511	103.05	116.64	8.17		472	16.9	257.54	7.51		401	35.88	210.53	2.7
427	24.12	14.36	11.63		511	102.58	116.72	8.81		472	16.01	257.81	7.55		401	36.03	209.85	2.81
427	24.62	14.7	14		511	103.52	117.2	9.25		472	15.54	257.87	7.34		401	36.04	209.75	2.39
427	24.43	15.25	12.99		518	84.91	122.9	10.54		472	15.17	258.03	7.11		401	36.52	209.83	2.42
427	24.85	14.81	13.47		518	84.8	122.89	9.76		472	14.35	257.72	6.47		422	80.32	154.39	13.93
427	25.05	14.92	10.24		518	85.24	122.05	8.52		472	14.49	257.31	6.41		422	81.56	153.97	12.99
427	23.7	15.39	12.84		518	83.47	123.88	9.43		472	13.67	257.33	4.73		422	83.81	153.87	10.17
427	24.32	14.84	12.69		518	85.22	123.52	7.5		472	13.08	257.09	6.07		422	83.96	153.85	10.22
427	24.57	14.34	10.07		518	84.52	125.11	7.99		472	13.62	257.43	5.33		422	83.36	153.5	8.27
427	24.62	14.87	12.61		530	45.24	213.06	3.4		472	14.57	256.87	3.84		422	83.88	153.58	9.88
427	24.33	15.41	14.01		530	44.37	213.1	2.82		472	14.98	255.6	4.27		422	82.31	154.24	9.8
427	24.32	14.21	13.62		530	44.57	213.91	2.02		472	15.4	255.47	3.83		422	83.03	153.83	10.19
427	24.35	15.8	13.73		530	44.79	213.81	3.52		472	14.52	254.54	4.27		422	83.27	153.98	11.36
427	24.39	14.38	14.07		530	44.67	214.15	2.77		472	14.62	254.43	4.18		422	83.25	154.45	8.4
427	24.34	15.42	13.38		530	44.91	213.95	2.45		472	15.5	254.43	4.54		422	81.61	154.63	11.11
427	23.45	15.85	15.72		530	44.54	214.34	2.35		472	16.39	254.05	5.13		422	83.46	153.62	11.65
427	23.8	14.21	15.12		530	45.09	214.99	1.97		472	15.28	254.21	6.27		422	83.53	154.3	10
427	24.57	13.71	13.61		530	44.61	213.99	2.35		472	15.12	253.29	6.07		422	82.54	154.4	10.67
427	24.4	13.53	13.47		530	44.75	215.49	0.733		472	15.22	252.67	6.65		422	83.41	154.02	8.46
427	23.66	14.02	13.67		530	44.49	215.12	2.07		472	14.86	253.43	6.07		422	81.5	154.95	11.59
427	23.41	14.73	14.82		544	8.26	43.31	25.44		472	14.9	251.68	4.73		422	83.42	153.85	12.58
427	23.85	14.43	11.97		544	9.49	43.22	25.04		472	12.79	255.08	6.75		422	82.13	154.47	11.28
427	24.11	14.41	11.62		544	9.07	42.99	26.42		472	15.65	252.34	4.18		422	83.07	154.74	8.98
427	23.95	14.86	9.27		544	9.61	44.8	25.09		472	17.77	251.5	4.39		422	81.21	154.09	13.7
427	22.98	14.56	14.94		544	9.14	44.18	26.64		472	16.81	255.27	5.08		440	48.56	252.39	7.12
427	23.68	14.3	11.87		544	8.33	44.41	26.94		472	18.4	255.66	4.45		440	49.18	252.29	4.91
427	24.13	14.73	11.04		544	8.95	44.11	25.27		472	17.69	255.17	4.06		440	49.08	252.17	4.06
427	24.13	14.14	11.46		544	9.25	44.85	25.26		472	16.5	254.48	4.17		440	49.69	252.08	4.8
427	24.76	14.39	11.4		544	8.84	45.49	25.86		472	16.64	254.69	3.41		440	49.22	251.92	5.3
472	22.67	174.36	8		544	10.65	46.15	23.35		472	16.74	254.78	3.41		440	50.11	252	4.09
472	22.27	174.51	7.76		544	11.63	46.01	23.09		472	16.57	254.14	3.82		440	50.36	252.05	5.55
472	22	174.48	8.74		544	11.88	45.86	22.57		472	16.26	254.14	3.27		440	50.56	252.05	4.7
472	22.98	174.55	8.82		544	11.77	46.02	22.05		472	16.74	253.97	4.41		440	49.41	251.68	4.11
472	22.92	175.13	8.42		553	236.67	174.92	8.97		472	16.66	253.38	3.82		440	48.92	251.18	4.37
472	23.15	174.26	9.4		553	237.48	175.52	11.41		472	17.03	253.93	3.6		440	49.76	251.4	5.13
472	23.28	174.05	8.33		553	238.39	174.64	9.6		472	17.84	253.45	2.66		440	49.47	251.31	5.3
472	23.02	174.27	9.73		553	237.93	175.72	10.44		472	18.24	253.7	3.12		440	50.5	251.51	3.55
472	23.25	174.21	9.55		553	236.71	175.4	8.64		472	18.71	256.23	3.09		440	50.6	251.85	4.14
472	22.36	175.19	10.83		553	237.62	175.55	10.49		472	19.05	256.93	2.83		440	49.82	251.82	4.91
472	22.58	175.83	10.22		553	236.12	175.33	8.91		472	19.2	255.95	3.46		440	48.57	251.12	5.15
472	22.61	175.43	9.56		553	236.87	175.6	6.92		472	19.12	254.71	3.13		440	49.11	251.38	5.11
472	22.61	175.29	7.29		565	242.49	238	5.47		472	19.35	254.19	3.05		456	89.62	171.87	2
472	22.36	174.45	8.28		565	245.43	239.56	7.25		472	19.59	254.45	2.69		456	88.43	168.23	4.71
472	22.39	173.99	8.87		565	244.69	238.48	6.05		472	19.52	254.94	3.46		456	88.17	167.3	4.51
472	22.41	173.75	7.55		565	244.8	237.83	6.48		472	19.72	255.2	3.24		456	89.15	167.5	8.43
472	22.57	174.05	8.74		565	245.44	236.89	7.82		472	20.36	255.62	3.42		456	90.55	166.79	4.02
472	22.77	174.17	8.59		565	244.46	239.09	5.89		472	20.12	253.07	3.37		456	90.16	167.38	5.39
472	22.96	173.88	8.34		565	243.89	239.54	4.9		472	21.05	256.11	3.13		456	89.48	167.13	4.86
472	22.94	174.63	8.27		565	245.86	236.51	6.65		472	21.49	254.73	3.21		456	89.88	167.87	6.96
472	21.91	175.32	8.45		565	245.45	239.31	4.62		472	22.12	255.43	2.75		456	89.5	167.38	6.77
472	22.21	175.55	9.19		565	244.33	239	5.3		472	22.09	255.21	3.45		456	89.33	166.85	6.62
472	22.4	174.77	8		565	243.66	240.55	4.49		472	21.96	254.96	4.71		456	89.15	166.91	5.71
472	22.36	175.17	8.71		568	132.07	141.63	11.91		472	21.88	253.23	4.29		456	88.4	165.21	6.44
472	22.97	174.23	8.09		568	129.81	142.63	10.47		472	21.47	252.47	5.37		456	89.94	167.04	4.95
472	22.58	175.26	9.19		572	75.31	252.13	29.18		472	20.75	251.85	6.5		456	90.41	167.32	6.04
472	22.55	175.85	9.92		572	74.74	252.63	29.11		472	22.05	252.61	7.15		456	90.25	167.59	5.21
472	22.12	175.76	10.33		572	73.19	252.77	26.4		472	22.45	252.95	6.43		471	85.57	33.18	11.14
472	21.82	176	10.54		575	142.36	55.07	12.89		472	22.09	254.32	8.09		471	86.47	33.32	10.82
472	22.01	174.83	9.08		575	143.23	54.78	13.24		472	22.81	255.2	9.02		471	86.33	32.28	14.7
472	21.94	174.69	10.57		578	89.91	81.83	12.91		472	24	255.52	8.2		471	85.77	30.47	12.96
472	21.61	175.36	10.36		578	91.25	82.29	12.94		472	22.61	255.87	7.83		471	85.77	29.05	12.64
472	21.59	175.81	10.8		582	134.22	130.86	22.96		472	25.3	254.89	7.94		471	85.79	33.29	12.84
472	21.86	175.26	10.26		582	135.34	128.46	22.14		472	28.1	252.73	9.62		471	86.28	32.15	11.98
472	21.92	175.6	9.62		582	132.24	131.01	20.77		472	30.35	252.99	6.05		471	84.82	32.42	10.61
472	21.56	176.44	8.82		585	141.61	172.83	16.44		472	31.14	252.52	3.02		471	85.38	31.75	11.04
472	21.14	175.74	7.9		585	143.71	175.83	19.57		472	33.26	252.28	7.33		471	85.14	32.32	10.51
472	22.62	174.38	7.25		594	76.37	251.5	26.27		472	36.05	252.85	9.26		471	87.31	33.01	11.79
472	21.7	174.4	7.85		594	76.28	251.64	26.58		472	37.95	251.53	9.91		471	86.75	32.17	12.23
472	21.94	175.26	7.39		594	75.62	251.65	29.38		472	38.85	251.19	9.68		471	87.79	31.91	10.91
472	21.62	175.76	7.77		594	77.28	251.82	27.35		472	38.8	249.09	8.53		471	87.24	31.83	11.69
472	21.97	175.68	7.58		594	76.23	251.49	27.87		472	38.66	247.43	8.55		485	208.48	75.51	38.57
472	21.37	175.88	8.19		594	75.55	251.37	30.02		472	38.32	246.12	8.24		485	207.47	75.77	34.91
472	22.14	175.28	7.62		594	76.4	251.95	27.73		472	39.02	245.5	6.39		485	206.37	74.83	35.05
515	119.89	59.66	21.98		594	75.2	252.19	27.72		472	38.52	243.8	6.65		485	206.95	74.51	34.89
515	119.94	59.99	21.75		597	125.46	138.26	12.47		472	36.98	243.48	7.32		485	205.54	74.45	34.55
515	120.31	60.51	20.7		597	126.88	138.98	12.99		569	262.28	122.36	53		485	202.82	73.12	30.45
515	120.08	58.88	22.44		601	66.02	174.16	11.51		569	262.11	122.57	52.48		485	202.48	73.45	31.22
515	120.92	58.41	21.52		601	67.17	176	11.62		569	262.66	120.37	52.36		485	202.79	73.27	31.28
515	120.98	57.79	23.06		601	67.15	174.97	10.26		569	265.77	121.39	50.06		485	201.84	72.19	34.75
515	122.01	57.57	23.19		604	132.75	128.09	19.41		569	264.7	122.19	51.9		485	203.76	72.51	32.73
515	122.26	58.31	23.69		604	134.11	128.68	22.01		569	269.06	120.57	50.23		485	204.3	69.62	32.4
515	122.67	58.35	22.75		607	89.1	82.08	13.55		569	266.92	120.69	50.38		485	206.57	66.71	34.65
515	122.58	58.1	22.81		607	89.5	81	12.76		569	267.43	121.03	48.6		485	204.94	64.73	37.29
515	122.56	57.8	20.44		610	105.27	189.26	11.14		569	263.86	122.45	47.7		499	49.37	143.84	22.65
515	122.7	57.61	19.62		610	104.59	191.67	9.67		569	267.64	120.98	48.67		499	51.44	147.1	23.3
515	122.44	56.47	19.75		613	153.14	196.66	18.45		569	268.63	122.67	46.82		499	52.36	144.21	21.28
515	121.92	55.85	18.06		613	154.65	197.23	17.97		569	267.52	122.2	45.39		499	52.38	143.81	21.35
515	122.19	55.01	17.37		617	140.79	51.8	9.9		569	266.22	120.96	48.24		499	54.65	142.75	18.58
515	122.15	54.97	17.2		617	142.54	54	12.15		569	269.06	120.25	48.3		499	54.3	143.59	11.52
515	122	55.38	17.25		617	142.91	54.74	12.21		569	270.22	120.54	50.81		499	55.11	142.88	15.58
515	122.14	54.89	16.07		626	236.22	171.78	12.11		569	271.31	120.53	48.99		499	54.58	141.43	19.36
515	122.11	55.14	16.56		626	237.05	173.15	12.37		569	272.53	119.74	46.35		499	51.26	143.37	19.53
515	122.4	54.74	16.03		626	235.41	173.1	11.52		569	273.52	119.35	45.77		499	51.56	144.58	19.3
515	122.08	54.2	17.21		626	237.02	173.44	13.87		569	273.61	119.95	44.96		499	50.96	143.2	19.56
515	122.29	53.76	16.56		626	235.82	173.41	10.91		569	273.9	119.98	43.11		499	51.9	142.7	14.85
515	121.77	54.91	16.33		626	236.74	174.14	13.06		569	273.61	120.17	39.37		499	50.55	143.91	19.06
515	120.98	55.11	14.07		626	236.51	174.06	10.79		569	273.44	120.48	39.31		511	40.32	197.35	3.72
515	121.08	55.47	14.28		626	238.05	175.18	11.04		569	274.42	120	41.3		511	39.81	197.26	4
515	116.72	56.36	14.76		642	42.71	210.01	6.14		569	276.35	120.36	38.93		511	39.26	196.74	3.3
515	120.85	56.76	8.67		642	43.04	210.5	5		569	278.82	120.02	41.05		511	39.12	196.71	3.9
515	121.27	56.97	8.62		642	43.01	209.61	6.64		569	279.13	118.93	37.22		511	38.69	197.27	4.47
515	120.92	56.52	9.52		642	43.16	210.15	6.47		569	280.27	119.69	35.15		511	39.33	197.36	3.62
515	120.72	56.55	5.85		642	42.98	210.68	5.91		569	281.04	119.62	34.22		511	39.15	196.34	3.12
515	121.47	56.71	6.97		642	42.92	210.22	6.41		569	283.1	119.06	34.54		511	38.11	195.86	4.55
515	120.96	56.62	5.64		642	43.2	210.37	6.25		569	283.03	119.39	35.31		511	38.62	196.09	4.13
515	120.68	56.18	11.02		642	43.55	210.26	6.83		569	282.71	120.55	36.7		511	38.51	196.03	2.64
515	121.23	55.54	11.69		642	43.06	210.96	6.06		569	279.76	122.36	36.49		511	38.48	196.13	4.09
515	121.09	58.18	8.2		642	42.98	211.07	4		569	278.82	123.2	35.36		519	83.01	250.43	5.05
515	120.81	56.29	7.57		642	43.54	211.33	4.84		569	278.57	124.29	34.82		519	83.54	251.1	4.94
515	120.32	56.64	5.86		642	43.43	212.43	3.26		569	277.57	125.22	34.34		519	83.76	250.32	5.85
515	120.04	57.23	6.99		642	43.48	212.25	3.68		569	277.23	126.28	34.49		519	83.12	250.74	4.93
515	120.58	55.9	7.21		642	44.04	212.4	3.04		569	275.51	126.55	31.79		519	83.95	250.15	4
515	120.91	56.59	6.61		642	44.03	212.98	2.2		569	275.35	126.46	29.61		519	83.24	250.85	3.89
515	120.61	57.41	5.56		647	119.3	135.29	9.32		569	276.35	125.41	31.48		519	84.68	250.54	5.56
515	119.81	56.27	5.31		647	120.06	135.69	10.86		569	276.98	126.06	28.86		527	80.39	193.67	30.62
557	61.47	233.4	22.32		647	121.04	136.08	9.21		569	277.16	128.05	26.99		527	82.34	191.57	27.15
557	62.2	233.02	20.61		647	121.6	136.27	9.4		569	276.72	129.06	24.04		527	82.61	191.52	26.49
557	62.34	231.35	20.66		650	157.49	249.05	31.49		569	274.98	128.99	23.02		527	82.04	191.68	26.52
557	66.99	229.11	17.96		650	155.62	249.44	28.8		569	272.73	126.68	20.56		527	83.22	191.24	28
557	61.47	229.29	19.28		664	134.11	218.05	29.53		569	273.91	124.88	21.26		527	84.7	189.94	28.66
557	66.07	228.57	18.75		664	135.04	219.1	29.68		569	274.63	123.24	21.51		527	84.43	190.16	27.59
557	61.85	230.02	19.8		664	134.8	218.88	28.49		569	275.41	122.41	21.9		534	209.07	235.76	0.974
557	65.87	228.82	18.49		664	135.3	219.06	28.89		569	275.77	122.69	21.54		534	209.73	235.88	1.72
557	62.4	229.32	20.42		664	135.6	218.81	28.42		569	275.47	123.95	19.87		534	209.28	235.56	1.69
557	61.57	230.37	18.65		664	136.12	220.07	28.44		569	275.67	124.7	18.78		534	209.62	236	2.21
557	61.91	229.65	16.29		664	136.33	220.45	28.53		569	274.58	127.93	20.31		534	210.08	235.81	2.66
557	61.44	229.72	19.72		664	136.32	221.58	28.63		569	274.67	129.19	21.04		534	210.33	236.18	2.33
557	61.13	229.13	17.81		664	135.87	221.46	28.38		569	274.97	128.7	21.63		539	99.18	99.92	6.22
557	60.04	230.39	17.99		664	135.13	220.27	26.36		569	274.34	128.94	22.06		539	98.58	100.5	8.09
557	60.72	229.19	19.03		664	135	222.6	26.9		569	273.91	128.88	20.82		539	100.43	99.14	6.99
557	60.68	228.37	17.44		664	134.13	223.56	27.2		569	273.74	129.32	22.1		539	99.57	99.46	6.53
557	60.96	228.82	17.66		664	135.22	223.34	26.79		569	273.87	128.57	21.17		543	91.7	94.48	32.05
557	60.46	227.43	14.89		667	103.91	195	13.7		569	274.3	129.08	20.33		543	90.95	92.48	30.54
557	59.49	227.57	16.48		667	103.81	195.1	11.28		569	274.26	129.83	21.35		543	89.5	91.43	31.8
557	57.82	227.22	17.85		677	243.75	235.55	6.37		569	272.88	129.58	20.46		546	246.59	104.78	8.47
557	57.45	226.65	15.94		677	243.96	235.31	6.05		569	271.47	129.73	22.25		546	248.94	107.05	9.25
557	58.44	227.39	17.24		677	243.72	237.08	5.74		569	270.01	128.85	22.49		549	122.91	180.99	30.05
557	57.26	227.84	19.6		677	243.8	237.15	7.45		569	269.63	129.12	22.45		549	122.38	182.03	28.66
557	58.19	229.77	20.61		677	243.52	236.21	7.44		569	267.83	128.71	21.73		552	151.39	207.19	12.32
557	56.84	231.91	20.16		677	243.94	238.16	7.27		569	266.58	128.66	22.08		552	152.57	206.96	10.52
557	57.62	231.88	22.08		677	244.07	236.68	6.94		569	264.11	128.77	21.59		557	136.45	97.33	4.71
557	57.68	233.1	22.57		677	243.84	236.7	6.07		569	263.44	128.93	24.11		557	135.15	98	6.29
557	55.87	234.73	25.18		677	242.98	236.27	7.65		569	261.62	129.45	23.6		557	137.27	96.2	6.21
557	55.59	235.99	24.66		682	163.12	68.27	6.65		569	260.14	129.84	24.95		557	136.38	97.43	5.17
557	54.87	236.25	26.89		682	162.07	68.26	5.42		569	260.3	129.53	24.49		561	39.27	39.22	8.49
557	54.39	237.1	22.85		682	162.88	69.91	7.08		569	259.02	129.78	23.97		561	38.45	41.96	13.24
557	54.89	238.33	23.25		682	163.01	70.68	5.86		569	257.62	129.69	23.8		561	38.17	37.81	6.96
557	56.21	238.85	23.48		699	115.17	133.81	15.23		569	256.32	130.85	23.98		564	26.6	126.09	5.76
557	57.34	239.96	24.51		699	116.53	133.92	13.81		569	254.75	131.39	24.31		564	27.3	128.54	2.37
557	58.55	241.03	27.88		699	116.85	133.01	11.29		569	253.11	134.31	24.64		567	118.18	246.2	1.88
557	61.63	242.47	29.44		699	116.9	133.49	12.96		569	253.72	135.68	21.27		567	119.15	248.31	6.67
557	60.38	242.23	29.69		699	117.57	133.86	12.84		569	254.29	137.03	18.21		575	79.58	2.05	24.79
557	60.65	242.46	30.84		699	117.77	134.24	13.02		569	254.75	136.82	18.85		575	81.24	4.59	23.37
557	61.72	242.79	33.22		699	119.67	133.41	12.84		569	257	136.02	20.12		575	81.25	3.34	23.85
557	62.66	243.11	30.13		699	118.42	133.86	12.87		569	257.82	135.05	18.7		575	81.91	4.18	24.09
557	61.28	243.19	32.99		699	121.69	134.6	13.95		569	257.71	135.22	18.4		575	81.39	3.21	23.18
597	102.74	83.63	5.44		699	120.55	134.2	10.21		569	256.79	135.84	20.66		575	80.11	2.94	21.46
597	105.8	83.97	6.67		699	120.04	135.32	13.09		569	256.37	137.23	19.98		575	82.26	4.45	24.45
597	106.37	82.97	4.83		699	119.14	134.87	8.98		569	255.49	137.03	17.3		578	246.85	106.4	7.66
597	106.53	82.85	7.12		699	120.03	135.08	12.01		569	254.61	136.48	15.8		578	246	105.63	9.57
597	106.84	82.56	5.34		699	120.55	135.34	12.05		569	252.53	135.52	8.16		583	231.21	203.63	3.77
597	107.25	82.98	6.78		699	121.18	135.77	11.08		569	254.37	134.45	14.82		583	231.07	203.4	3.27
597	108.13	83.48	5.8		699	122.83	135.49	11.27		569	253.61	134.67	18.33		583	229.14	202.92	3.58
597	109.2	83.6	4.4		707	75.05	250.95	29.25		569	254.1	133.75	19.93		583	229.62	203.11	3.91
597	110.06	84.64	4.83		707	74.96	250.48	32.76		569	256.49	132.86	21.39		588	4.6	163.98	21.05
597	109.38	83.02	7.31		707	74.37	251.17	29.01		569	259.25	132.89	21.18		588	3.75	164.49	15.34
597	108.24	82.57	6.27		707	74.82	250.91	29.43		569	261.69	132.41	21.81		588	3.56	164.36	14.71
597	109.37	83.48	3.89		707	73.37	251.95	28.72		569	263.84	133.31	20.9		588	3.41	166.41	14.96
597	109.67	83.2	4.55		707	74.74	251.58	30.83		569	269.28	134.34	21.26		591	214.77	100.87	9.95
597	108.79	83.44	3.87		707	76.02	251.61	31.18		569	273.81	134.48	19.35		591	216.54	98.52	8.74
597	108.82	83.51	4.76		711	88.2	81.12	13.07		569	274.36	132.2	19.92		597	99.27	99.57	8.41
597	108.86	83.03	6.69		711	88.46	80.68	14.57		658	217.16	116.37	39.1		597	98.75	99.72	7.4
597	109.28	82.9	5.36		711	88.26	81.29	14.59		658	216.32	112.38	38.76		597	99.02	100.22	14.61
597	110.24	82.22	5.57		715	250.66	207.02	1.11		658	215.7	110.23	39.03		597	99.37	100.14	15.25
597	109.38	82.88	7.18		715	251.04	207.1	0.756		658	214.66	105.64	40.22		597	98.31	100.39	16.52
597	109.22	83.32	5.02		715	251.1	206.76	0.375		658	212.81	103.54	41.38		618	242.14	161.94	7.75
597	109.87	82.94	4.86		738	103.13	196.95	18.61		658	208.2	99.35	40.05		618	242.6	163.2	3.8
597	110.04	83.97	3.47		738	105.7	199.1	20.06		658	205.64	96.59	39.2		618	242.93	161.98	3.94
597	110.68	83.24	5.93		738	107.46	200.45	19.42		658	201.28	93.8	37.53		618	243.29	161.61	4.53
597	109.61	83.31	6.61		738	107	198.58	18.38		658	198.02	91.05	35.47		618	241.52	161.02	2.57
597	108.89	84.3	5.85		738	107.5	199.89	17.38		658	197.03	88.4	35.06		618	240.62	161.59	2.12
597	109.57	83.54	4.54		738	107.6	200.14	19.03		658	195.57	87.73	33.63		618	239.58	159.6	3.52
597	109.18	83.21	6.24		738	104.83	199.56	19.51		658	192.54	87.27	36.22		618	239.66	158.65	2.7
597	108.64	83.13	5.8		738	104.98	200.16	18.4		658	189.38	86.37	35.98		618	239.32	156	2.17
597	108.17	82.91	5.47		738	104.1	201.13	21.29		658	185.54	84.65	36.36		618	238.61	154.03	0.409
597	108.62	82.61	7.32		738	104.17	200.77	20.44		658	181.74	84.32	37.13		618	236.73	153.08	0.424
597	110.11	84.04	5.96		738	103.06	200.43	19.62		658	179.26	84.52	34.92		618	232.44	152.4	1.55
597	109.37	83.57	4		738	103.97	200.98	20.02		658	177.21	82.91	34.41		618	230.45	151.95	4.68
597	108	83.13	3.43		738	104.38	200.79	19.66		658	173.21	79.86	33.18		618	228.73	151.39	2.87
597	107.73	82.65	4.48		738	103.64	201.58	19.76		658	168.74	78.3	31.21		618	228.89	150.73	3.15
597	106.24	81.49	8.13		738	102.95	202.18	17.53		658	165.64	75.56	28.52		618	228.56	150.33	4.39
597	107.28	83.2	5.64		738	103.16	201.24	18.42		658	164.85	74.43	30.41		618	229.62	151.62	1.72
597	104.35	81.94	3.01		738	103.78	201.03	19.86		658	165.73	76.06	30.76		618	229.81	152.07	1.59
597	106.55	81.61	5.6		738	104.7	201.05	19.09		658	165.03	75.29	28.05		618	230.38	152.18	0.897
597	104.57	82.24	5.82		738	103.18	199.38	18.61		658	165.04	75.6	29.42		618	229.13	151.96	2.07
635	6.48	173.32	35.64		738	103.83	198.98	17.23		658	163.89	75.29	30.17		623	17.36	248.82	7.01
635	6.11	171.82	37.38		738	106.43	199.19	17.38		658	163.7	75.13	28.81		623	18.23	246.99	7.89
635	5.99	175.7	36.74		738	103.64	197.54	16.7		658	163.6	75.83	29.61		623	19.77	248.14	8.36
635	6.07	176.16	38.25		741	117.78	201.18	16.39		658	163.89	74.95	30.78		623	20.15	247.32	11.41
635	4.83	178.14	36.08		741	118.96	205.78	19.94		658	164.45	74.61	31.36		638	4.7	103.6	18.4
635	5.77	177.39	34.24		745	153.42	197.9	31.3		658	164.07	73.87	32.62		638	2.33	107.3	18.05
635	6.26	178.71	34.17		745	154.72	200.16	34.89		658	163.03	72.11	33.1		638	3.87	106.17	14.97
635	6.31	179.62	35.87		745	154.53	199.62	39.56		658	161.9	71.25	33.01		638	2.45	107.62	12.5
635	6.03	178.09	34.72		748	164.12	7.19	5		658	163.25	72.3	30.61		638	1.84	107.94	11.64
635	6.04	180.01	36.85		748	164.36	6.36	4.45		658	164.33	74.26	30.85		638	1.64	109.13	11.38
635	5.45	182.75	35.93		752	62.63	163.58	4.92		658	164.57	74.02	29.84		638	1.71	108.85	11.28
635	5.46	181.51	37.33		752	63.81	163.02	2.65		658	164.93	75.23	30.62		638	1.54	109.03	11.08
635	5.26	181.76	35.08		752	62.36	164.03	4.63		658	165.32	75.87	32.48		638	0.984	109.02	10.98
635	5.79	181.48	36.36		756	108.99	107.72	9.17		658	165.67	75.69	31.2		638	1.42	110.11	13.61
635	5.25	182.64	36.68		756	109.77	107.21	8.56		658	166.27	77.82	30.45		638	2.85	110.12	12.18
635	7.07	181.5	37.18		756	110.36	107.78	9.94		658	168.22	78.75	28.21		638	2.16	110.93	9.57
635	5.71	178.91	36.07		781	232	167.09	17.34		658	168.16	78.45	28.02		638	1.08	110.45	12.59
635	5.75	178.01	36.9		781	232.65	167.6	13.99		658	168.22	78.13	27.18		638	4.53	111.97	11.01
635	5.75	177.55	38.75		781	232.49	167.15	18.24		658	166.8	78.42	28.61		732	75.53	208.5	19.88
635	5.42	179.31	37.6		781	232.75	168.06	15.52		658	166.03	79.62	30.04		732	76.81	207.37	18.68
635	5.69	180.27	38.09		781	232.36	168.11	15.91		658	166.31	78.36	29.15		732	77.06	207.41	19.29
635	5.62	179.66	37.26		781	232.96	168.67	16.2		658	166.23	78.63	29.03		732	75.8	206.9	18.83
635	6.44	175.08	36.35		781	232.43	168.31	16.75		658	166.33	78.05	29.23		732	75.99	207.15	19.86
635	4.65	178.73	37.53		781	232.67	168.97	14.92		658	165.89	78.25	29.94		732	77.03	206.73	19.49
635	5.05	178.72	36.17		781	233.17	169.41	13.8		658	165.87	78.51	29.57		732	76.58	208.52	19.57
635	4.46	179.8	37.73		781	233.73	168.92	15.03		658	165.64	78	30.07		732	73.98	208.34	21.83
635	4.58	180.68	37.49		781	233.07	168.97	15.9		658	166.36	78.75	29.68		732	76.49	207.32	19.16
635	5.1	181.47	37.75		781	233.91	169.68	13.66		658	166.3	78.68	28.75		732	75.83	206.9	20.21
635	6.08	181.2	33.48		781	233.31	169.3	14.15		658	165.85	78.81	31.52		732	76.29	207.57	20.02
635	4.37	181.44	34.94		781	235.84	170.71	16.11		658	166.05	79.19	30.22		732	75.68	207.49	19.33
635	5.12	181.57	35.85		781	233.83	170.2	14.75		658	166.6	78.79	30.55		732	75.39	207.23	19.45
635	4.97	180.76	34.64		781	234.71	170.54	15.49		658	166.16	79.34	30.53		732	76.63	207.02	18.42
635	5.47	182.25	36.24		781	234.02	170.53	15		658	165.26	78.35	31.41		732	76.32	207.83	18.5
635	6.58	181.24	35.21		781	235.01	172.27	14.16		658	166.77	79.23	31.19		732	76.53	206.35	19.77
635	6.62	181.41	34.81		781	235.87	171.23	13.26		658	166.16	78.95	30.76		732	76.89	207.74	20.71
635	6.79	182.05	32.87		781	235.69	171.71	15.08		658	166.16	78.99	31.68		732	75.25	205.94	17.89
635	6.92	181.57	34.37		781	236.13	171.93	12.55		658	166	78.13	31.91		732	76.13	207.24	17.11
670	101.77	18.19	36		781	236.19	171.11	14.29		658	166.28	78.39	32.38		732	76.74	208.28	17.76
670	101.66	17.28	35.83		781	235.88	171.87	13.24		658	166.7	79.5	30.66		732	75.88	207.54	17.43
670	101.4	18.52	33.36		781	236.68	172.62	12.95		658	166.24	79.05	31.94		732	76.49	207.2	19.24
670	101.46	18.15	34.18		790	44.64	176.86	7.24		658	166.94	78.84	31.43		732	75.68	207.03	18.13
670	99.97	18.84	35.31		790	47.41	174.25	5.38		658	166.11	77.74	30.85		732	75.85	208.05	18.44
670	100.15	17.04	35.65		790	50.26	172.42	4.88		658	165.85	77.18	30.29		732	76.81	208.24	19.4
670	99.24	18.31	35.66		790	56.65	168.14	2.81		658	165.23	77.29	30.26		732	77.07	208.02	19.51
670	99.99	19.11	36.23		790	59.45	166.29	3.78		658	165.06	77.87	29.74		732	77.29	209.45	19.18
670	101.16	19.13	32.91		790	59.01	166.47	2.16		658	166.05	76.95	29.82		732	76.01	207.42	20.78
670	101.94	19.23	34.01		790	59.77	167.12	3.72		658	166.13	77.45	30.92		732	76.72	207.25	19.94
670	102.55	19.92	34.42		790	58.97	168.08	2.32		658	165.4	77.71	31.84		732	76.38	206.57	18.01
670	102.11	19.59	33.22		794	88.36	79.26	16.36		658	166.21	78.81	30.89		732	77.32	207.57	20.54
670	102.41	19.11	32.24		794	87.71	80.67	15.3		658	166.22	78.49	31.66		732	76.68	206.64	19.13
670	102.09	17.87	34.03		794	88.26	80.64	15.95		658	166.77	78.77	29.74		732	76.31	206.63	18.85
670	101.96	18.83	32.74		797	65.14	172.16	12.62		658	167.01	78.58	32.62		732	76.36	205.96	19.69
670	98.69	19.53	34.66		797	64.3	171.43	13.71		658	167.97	77.94	30.98		732	76.57	207.15	18.88
670	98.73	18.64	37.11		800	6.3	42.3	32.02		658	167.28	77.85	26.72		732	76.64	208.34	18.22
670	98.83	19.42	36.6		800	7.58	45.32	33.99		658	167.58	77.92	29.83		732	76.3	208.67	17.96
670	97.99	17.8	36.88		810	72.62	247.43	28.48		658	168.88	77.54	32.09		732	76.23	208.2	18.11
670	97.4	17.3	36.81		810	72.65	247.66	28.65		658	167.74	77.32	35.64		732	75.06	208.42	19.61
670	95.82	16.65	37.9		810	73.65	248.12	31.01		658	169.55	77.05	36.11		732	76.33	207.1	18.81
670	93.74	17.33	39.39		810	73.77	247.59	33.28		658	168.91	77.64	36.95		732	76.77	207.58	17.82
670	96.94	18.16	37.24		810	73.59	249.11	30.48		658	168.88	77.69	35		732	76.62	208.15	18.29
670	98.3	18.31	37.85		810	73.48	249.85	33.74		658	169.68	76.54	35.49		732	77	207.92	19.28
670	98.29	17.51	35.45		810	74.46	250.08	29.82		658	170.15	76.71	34.86		732	77.34	206.14	18.12
670	97.2	17.59	35.75		810	74.36	250.26	28.97		658	169.39	77.2	32.91		732	76.97	206.26	20.06
670	95.77	18.18	34.11		810	72.31	249.32	27.11		658	169.51	78.18	36.96		732	78.03	205.29	20.32
670	95.89	17.37	35.07		813	126.34	130.56	21.96		722	191.59	175.67	9.95		732	77.45	204.71	21.79
670	96.25	17.5	33.39		813	127.23	130.4	25.19		722	192.28	176.27	8.71		732	78.3	202.42	20.56
670	96.49	17.07	33.38		828	71.84	201.66	6.57		722	191.25	175.94	11.34		732	77.44	202.4	22.72
670	96.96	17.79	33.27		828	71.13	202.5	6.57		722	191.88	175.85	11.31		732	77.6	201.94	21.14
670	96.73	16	35.22		828	71.09	202.67	6.91		722	190.6	175.13	12.64		732	77.73	201.22	21.61
670	97.94	17.42	33.66		828	72.22	202.6	8.4		722	191.66	174.82	13.1		732	77.64	200.01	20.13
670	99.47	17.97	29.43		828	72.61	202.7	6.23		722	190.63	174.82	13.15		732	78.53	200.85	20.33
697	205.16	252.23	28.22		828	75.06	201.94	6.18		722	191.78	175.55	12.11		732	77.81	200.02	19.88
697	204.96	250.8	27.36		828	78.31	201.63	3.9		722	192.27	175.7	11.83		732	77.91	199.9	20.64
697	204.96	250.67	30.78		828	78.8	201.97	3.1		722	190.43	174.7	12.38		732	76.81	200.2	20.97
697	204.51	249.63	29.38		828	78.84	202.41	3.42		722	191.59	175.18	10.87		732	76.93	199.67	20.67
697	204.33	248.46	30.24		828	78.68	202.78	4.03		722	191.79	175.42	10.66		732	75.17	199.61	17.76
697	202.9	247.48	30.7		828	75.55	202.98	6.38		722	190.9	174.3	10.75		732	75.69	199.54	19.73
697	201.61	245.17	31.42		828	78.03	203.58	3.68		722	190.78	174.08	11.76		732	75.1	199.78	20.31
697	198.83	243.6	30.33		828	75.57	203.32	6.01		722	190.44	173.56	10.56		732	73.98	199.44	19.69
697	196.48	242.3	28.63		828	76.62	203.91	4.97		722	191.23	175.02	8.7		732	73.36	198.88	19.34
697	195.07	242.95	32.1		832	134.9	222.14	30.4		722	191.14	174.52	9.14		732	73.36	198.76	19.01
697	193.77	243.15	30.71		832	135.7	220.34	29.59		722	190.77	174.92	8.82		732	74.84	198.35	19.78
697	193.01	243.87	31.24		832	134.54	221.9	29.61		722	190.99	174.47	9.07		732	74.59	197.56	21.47
697	191.92	244.93	31.12		835	242.71	235.78	6.7		722	191.92	175.75	9.19		732	74.3	197.49	24.36
697	191.38	244.43	29.19		835	244.11	236.39	5.3		722	191.03	175.02	9.7		732	75.22	197.81	23.55
697	190.97	244.87	31		842	88.95	82.96	14.4		722	191.33	174.81	10.22		732	74.19	198.59	21.77
697	190.21	245.79	29.76		842	88.59	83.45	13.79		722	190.86	174.81	10.54		732	75.65	196.33	26.13
697	189.74	246.21	29.01		842	88.22	80.47	17.83		722	190.41	174.57	8.82		732	75.61	196	25.84
697	189.56	246.15	26.56		842	88.4	81.67	15.38		722	190.25	174.62	9.44		732	76.39	194.55	27.71
697	191.16	246.09	27.53		842	88.39	80.05	17.98		722	190.35	174.6	10.74		732	76.11	195.8	25.23
697	190.23	246	28.15		842	88.4	80.46	16		722	190.73	175.32	9.89		732	74.99	194.34	27.68
697	189.46	247.34	28.2		845	151.87	198.64	38.84		722	190.87	175.71	10.03		732	75.86	192.41	33.81
697	188.82	248.98	29.26		845	151.34	199.87	41.07		722	190.17	174.22	8.68		732	76.01	194.73	27.92
697	189.43	249.19	30.94		848	152.68	193.91	23.22		722	190.83	174.58	10.14		732	76.12	194.46	30.78
697	191.17	248.58	29.6		848	154.89	195.17	21.28		722	190.17	174.77	8.65		732	76.14	193.82	29.88
697	191.16	248.53	29.75		853	70.73	202.55	9.2		722	190.52	174.35	10.83		732	76.54	194.03	29.51
697	191.23	248.94	28.99		853	71.33	203.13	6.46		722	190.79	173.65	9.77		732	76.37	195.47	28.12
723	215.39	143.1	12.41		853	70.86	202.85	8.07		722	191.18	174.41	9.98		732	76.27	195.05	28.19
723	216.88	145.6	12.03		853	70.9	202.4	11.77		722	190.65	173.19	10.28		732	75.34	194.29	28.49
723	217.14	146.9	13.12		867	241.07	234.06	7.44		722	189.92	173.4	11.77		732	76.07	194.08	30.29
723	217.68	146.57	10.37		867	241.24	234.7	5.34		722	190.57	173.4	10.89		732	76.03	193.54	30.5
723	218.07	147.45	9.88		867	241.21	234.65	8.2		722	190.35	173.18	9.86		732	76.28	195.48	25.84
723	218.38	146.73	8.91		867	241.12	234.07	6.77		722	191.41	174.11	10.33		732	76.64	194.32	28.68
723	218.02	148.49	11.16		867	242.09	234.08	5.95		722	190.72	173.55	11.21		732	76.43	194.88	27.69
723	217.38	148.08	12.25		867	241.76	234.84	6.47		722	192.07	174.31	10.09		732	77.68	195.21	24.73
723	218.23	148.05	11.46		867	241.81	234.15	7.04		722	191.65	174.14	11.52		732	76.34	196.32	26.3
723	219.08	148.14	10.66		867	242.34	235.25	6.37		722	191.16	173.88	10.43		732	76.88	195.51	26.67
723	218.52	148.2	11.89		867	243.03	233.63	6.76		722	191.78	174.88	8.99		732	76.03	195.03	26.35
723	218.2	148.52	12.39		867	242.5	234.05	8.93		722	191.04	173.94	9.17		732	79.51	193.39	28.67
723	219.01	148.17	10.4		867	241.86	237.06	7.03		722	190.48	173.86	9.82		732	80.67	193.39	27.29
723	220.03	147.37	11.17		867	242.03	234.17	5.51		722	190.54	173.08	9.82		732	82.07	191.98	32.52
723	219.86	148.65	12.32		867	242.73	236.85	7.87		722	191.39	175.01	9.1		738	214.35	100.65	8.9
723	219.4	148.7	9		870	134.27	222.01	30.06		722	191.56	173.77	10.96		738	217.05	100.12	9.39
723	219.56	149.06	9.55		870	134.45	220.25	28.97		722	190.77	174.11	10.77		738	214.59	100.95	9.85
723	218.15	148.52	9.32		873	151.8	196.84	35.97		722	191.58	174.55	10.04		738	220.74	99.7	9.82
723	218.91	148.85	10.3		873	151.58	198.42	41.1		722	191.31	174.05	8.94		738	222.49	99.78	10.2
723	217.96	147.98	10.87		876	160.28	17.57	8.97		722	190.43	174.27	2.55		741	12.68	166.19	13.87
723	218.7	147.85	8.58		876	159.82	16.56	8.27		722	192.32	174.85	8.11		741	10.4	163.96	13.95
723	218.18	147.57	10.87		886	78.97	243.03	37.55		722	190.77	174.64	11.72		745	245.07	107.42	8.91
723	218.18	147.59	9.73		886	77.55	244.84	38.63		722	192.42	173.96	12.85		745	245.4	108.58	6.49
723	218.61	148.75	9.99		886	78.39	244.32	40.89		722	190.92	174.02	12.22		745	246.43	108.76	9.43
723	217.45	148.12	11.05		886	77.99	246.91	38.77		722	192.64	174.14	12.54		748	140.52	204.32	33.19
747	252.6	225.72	16.41		886	78.04	248.74	37.18		722	191.86	174.13	11.69		748	142.09	200.54	33.07
747	251.74	225.14	14.33		886	77.87	245.45	37.4		722	192.31	174.53	12.2		752	101.94	161.36	3.2
747	251.58	225.03	17.24		886	79	248.53	38.36		722	192.88	174.08	11.64		752	102.29	161.25	4.3
747	250.92	223.71	14.66		886	79.22	248.31	35.75		722	191.04	174.05	11.67		752	102.14	160.29	3.18
747	249.96	223.06	15.96		886	80.73	248.73	39.93		722	191.45	173.71	12.39		756	230.93	201.75	3.61
747	248.58	221.61	16.92		913	40.25	206.6	16.07		748	127.13	18.52	24.5		756	232.16	202.41	4.73
747	248.24	220.66	16.35		913	40.88	206.68	14.05		748	127.54	18.96	24.72		756	227.63	203.39	3.19
747	247.84	219.1	15.18		913	40.87	207.27	14.97		748	126.68	18.74	24.91		848	114.6	102.43	7.19
747	246.5	218.57	13.23		913	40.98	207.51	13.56		748	127.93	18.82	23.65		848	114.79	103.1	9.72
747	245.24	216.54	15.94		913	40.91	207.58	9.96		748	127.7	18.61	22.83		848	114.32	104.17	8.41
747	243.73	213.62	17.49		913	41.26	208.06	6.88		748	127	17.91	23.49		848	116.8	101.91	8.38
747	242.82	211.66	17.58		913	40.48	208.05	7.03		748	125.92	18.97	23.36		848	114.81	103.15	7.28
747	242.38	212.09	14.59		913	41.36	208.15	6.57		748	127.33	18.56	24.39		848	114.54	104.02	7.37
747	242.9	210.77	11.14		913	40.61	208.26	6.96		748	127.14	18.3	23.97		848	115.62	102.89	6.05
747	242.83	211.32	10.99		913	40.61	208.01	6.02		748	127.29	18.29	21.66		848	116.32	102.79	8.69
747	243.14	212.38	9.43		913	40.65	207.76	6.31		748	126.97	18.89	24.52		848	115.67	103	7.8
747	243.22	210.8	9.45		913	40.81	206.99	5.81		748	127.07	18.99	23.82		848	114.84	102.78	7.31
747	244.71	210.01	5.79		913	40.34	208.47	4.6		748	127.36	19.48	22.16		848	114.93	102.95	7.55
747	245.59	210.02	6.69		913	39.96	207.66	5.04		748	127.01	18.87	22.18		848	114.91	103.82	7.75
747	245.47	210.12	6.48		913	40.73	209.5	3.87		748	125.91	18.96	15.93		848	114.87	103.14	8.1
747	245.02	209.79	9.74		913	40.36	208.55	4.1		748	126.62	18.79	23.06		848	114.4	103.53	7.17
747	244.92	210.21	9.21		913	41.01	208.95	3.38		748	126.51	18.79	27.04		848	114.87	103.89	6.51
747	244.04	210.02	10.69		913	40.85	208.13	5.51		748	127.06	18.61	28.21		848	115.35	102.97	7.64
770	152.19	31.77	27.6		913	40.73	209.79	3.37		748	127.41	18.76	27.5		848	117.09	102.96	6.76
770	146.59	33.76	22.83		913	41.11	209.45	3.25		748	127.82	18.51	27.14		848	114.6	102.17	6.64
770	148.16	32.54	23.79		913	41.23	209.19	3.93		748	127.78	18.14	24.12		848	113.74	103.98	5.87
770	149.67	31.69	25.88		913	41.79	209.18	5.47		748	128.26	19.71	25.35		848	112.55	105.18	5.81
770	147.99	33.44	21.54		913	41.27	208.83	4.64		748	127.2	18.82	25.42		848	113.87	103.61	8.75
770	148.15	34.43	21.72		913	41.31	208.94	5.04		748	127.84	18.59	25.04		848	113.56	104.18	4.95
770	149.21	34.09	19.66		913	41.77	209.11	4.58		748	127.28	19.03	26.96		848	113.61	104.73	6.02
770	146.76	34.68	23.57		913	41.41	209.8	4.88		773	67.56	27.68	21.67		848	113.69	103.95	5.98
770	146.06	33.29	23.49		918	152.39	197.16	23.27		773	69.35	27.63	23.56		848	113.46	103.45	7.5
770	144.32	33.6	21.92		918	153.17	195.1	28.79		773	67.41	27.34	22.22		848	114.38	103.95	6.27
770	143.32	34.78	19.42		918	153.94	195.23	21.42		773	67.44	27.91	22.5		848	113.78	103.58	6.91
770	143.56	35.53	18.66		918	153.96	195.96	23.64		773	67.37	27.9	20.17		848	114	105.18	6.44
770	142.94	37.38	14.86		921	159.86	15.7	8.54		773	67.52	27.96	21.77		848	113.83	103.41	5.88
770	144.84	37.27	10.75		921	158.82	16.54	8.43		773	67.27	27.56	21.78		848	112.37	105.18	6.65
770	145.42	36.89	9.65		930	55.02	2.06	14.76		773	67.16	28.02	21.73		848	113.22	104.64	6.18
770	145.81	34.53	8.5		930	56.34	1.46	16.32		773	67.02	27.86	22.15		848	115.89	102.45	8.51
770	146.04	31.33	6.86		930	57.47	1.49	17.57		773	67.47	28.03	23.15		848	113.38	104.57	5.87
770	146.56	28.36	6.33		930	57.09	1.61	17.48		773	68.98	27.72	24.14		848	113.7	105.27	7.46
770	145.86	28.61	6.07		930	56.54	2.26	16.93		773	67.86	27.3	21.44		848	113.5	105.1	5.96
770	146.43	25.41	7.26		930	57	2.84	17.5		773	67.8	27.86	21.89		848	112.69	105.39	5.49
770	145.53	24.16	6.36		930	57.69	1.36	18.32		773	67.31	27.6	16.77		848	113.94	104.47	5.84
770	144.46	25.61	6.35		930	56.93	2.91	17.73		773	67.89	27.28	20.84		848	114.46	104.38	5.73
792	80.54	222.02	22.45		935	37.61	176.67	8.6		773	66.7	27.09	24.71		848	114.05	103.9	6.3
792	80.2	223.44	19.62		935	40.71	177.83	7.07		773	68.73	26.9	27.29		848	113.94	104.51	6.35
792	82.86	224.51	23.99		935	44.07	176.04	6.19		773	68.25	27.25	24.78		848	113.86	103.74	6.52
792	84.19	224.94	21.32		935	42.77	176.44	6.31		773	68.87	27.68	26.09		848	115.23	103.31	4.78
792	85.89	225.56	21.61		939	126.84	129.71	24.86		773	66.3	28.02	22.67		848	113.33	104.28	6.84
792	84.7	219.96	18.01		939	126.82	130.27	25.69		773	68.1	27.22	27.07		848	114.56	104.28	6.83
792	85.22	219.62	17.68		939	126.94	129.77	24.16		773	69.39	28.02	24.21		848	113.94	104.84	5.07
792	86.27	219.55	19.31		944	172.09	248.69	33.15		773	67.51	27.25	25.18		848	113.47	103.62	7.27
792	86.15	221.46	20.5		944	172.29	247.74	33.02		773	69.4	27.54	24.13		848	113.78	103.62	5.31
792	84.6	223.51	19.91		944	174.58	248.97	35.81		795	177.22	60.76	28.61		848	113.6	105.44	8.44
792	82.85	224.63	17.16		944	171.95	249.02	34.88		795	177.17	61.49	27.02		848	112.41	103.7	5.87
792	80.41	226.38	17.54		949	152.49	195.62	30.73		795	176.9	61.19	26.44		848	111.89	104.61	5.48
792	81.34	227.29	13.76		949	151.47	197.05	36.07		795	177.13	60.82	28.83		848	112.02	104.72	6.22
792	80.93	229.38	12.37		949	151.86	196.89	34.12		795	177.36	61.48	27.75		848	111.64	104.44	6.41
792	81.2	229.6	12.13		949	151.55	196.62	40.94		795	177.01	60.1	28.49		848	111.39	103.37	5.89
792	81.24	229.49	11.65		957	162.3	2.96	4.32		795	177.04	61.1	29.26		848	112.84	104.29	7.11
792	82.2	229.48	10.97		957	162.71	4.15	4.18		795	177.03	60.47	28.82		848	112.25	104.38	6.19
792	82.12	230.46	11.1		957	162.34	4.2	4.95		795	177.17	61.08	27.39		848	112.74	105.22	5.7
792	80.06	232.92	11.36		957	162.68	4.16	5.04		795	177.09	61.06	28.46		848	112.02	104.71	6.14
792	79.78	232.36	11.66		957	162.05	4.93	5.48		795	176.46	60.36	23.46		848	111.65	103.78	4.4
792	78.89	232.73	13.52		957	163.12	3.47	4.26		795	179.35	53.45	23.76		848	112.92	105.6	7.54
805	6.21	94.63	12.89		957	162.45	3.13	3.45		795	180.48	51.83	24.08		848	112.42	105.09	6.58
805	7.4	90.64	11.19		970	91.36	121.43	15.15		795	180.73	51.54	25.73		848	112.48	104.74	5.99
805	5.61	91.73	10.32		970	92.46	121.75	13.67		795	180.48	51.69	25.54		848	110.78	105.46	3.52
805	5.41	91.76	8.33		970	93.87	123.32	11.92		795	181.2	51.36	25.16		848	111.96	106.17	4.78
805	4.92	91.74	8.6		970	92.49	123.56	12.15		795	181.09	51.55	24.86		848	110.88	104.69	4.05
805	5.39	91.54	9.11		970	91.36	124.32	11.65		795	180.86	51.01	25.25		848	111.93	104.98	5.78
805	5.8	91.12	8.84		970	91.23	123.09	11.79		795	181.17	51.54	24.19		848	112.3	105.23	5.69
805	5.64	93.63	11.94		970	90.53	123.07	11.5		795	181.46	51.71	24.86		848	112.43	104.78	7.55
805	5.34	91.6	8.88		970	89.74	123.9	11.66		795	180.64	51.24	24.78		848	110.57	103.55	6.06
805	4.89	92.29	9.13		970	90.44	123.47	14.1		811	122.94	216.13	13.29		848	112.12	104.06	6.62
805	4.55	92.69	9.14		970	87.94	123	12.36		811	122.25	216.69	11.32		848	111.19	102.77	8.1
805	4.67	92.07	7.97		970	88.12	123.17	12.53		811	121.22	215.32	9.39		848	109.35	101.77	8.17
816	44.15	209.43	26.39		970	84.93	124.11	11.37		811	120.65	215.2	8.77		848	109.58	101.02	6.31
816	44.56	209.31	28.29		978	89.87	88.56	18.67		811	118.06	216.2	5.39		848	108.73	100.31	8.99
816	46.05	207.23	25.51		978	89.23	88.44	18.16		811	119	215.25	8.11		848	109.24	100.35	6.71
816	44.9	206.9	31.45		978	89.92	87.43	16.59		811	118.96	215.62	8.16		848	108.27	100.08	9.13
816	43.72	204.7	32.79		978	89.68	89.51	21.5		811	115.94	216.29	10.15		848	109.07	100.97	6.81
816	41.76	202.47	31.73		978	90.01	88.94	17.5		811	116.06	215.94	8.06		848	107.93	99.93	9.72
816	39.97	202.08	33.2		978	90.59	86.96	14.7		811	113.71	217.63	9.3		848	107.24	99.41	11.57
816	39.06	201.32	33.48		978	90	85.29	13.97		811	110	220.87	8.38		848	106.92	98.49	10.99
816	38.78	198.67	32.61		985	87.85	128.49	6.14		811	110.04	221.65	9.22		848	107.38	98.96	12.04
816	38	196.33	32.82		985	86.74	130.49	6.39		811	109.56	221.75	8.45		848	106.53	98.68	11.78
825	90.07	211.97	14.38		985	85.35	131.61	7.46		811	110.06	223.22	7.52		848	106.19	98.64	9.71
825	89.52	208.76	18.23		985	85.7	132.01	5.42		811	110.61	225.45	7.39		848	106.74	99.21	11.66
825	88.56	205.49	17.7		985	84.32	135.35	4.6		826	109.64	79.77	25.91		848	104.59	98.63	10.04
825	88.87	204.96	16.48		985	84.54	132.97	5.45		826	110.06	79.79	26.92		848	104.03	98.99	10.13
825	89.28	201.36	15.7		1006	132.71	217.22	39.41		826	107.61	80.29	24.76		848	103.48	98.82	8.14
825	88.68	200.19	14.21		1006	131.22	217.95	36.02		826	106.89	80.9	18.72		848	100.96	99.38	7.76
825	88.8	199.17	13.56		1006	131.52	216.55	33.22		826	108.95	78.64	24.2		848	101.39	99.19	9.22
825	88.33	196.1	11.87		1006	132.17	217.68	32.25		826	108.72	77.55	27.51		848	99.76	99.82	7.64
834	4.83	239.01	35.05		1006	132.28	218.37	30.66		826	108.28	77.37	28.83		848	100.27	99.4	6.79
834	5.51	238.83	34.82		1006	131.88	218.9	32.1		826	107.19	72.32	30.78		848	98.83	99.53	7.51
834	5.94	238.1	36.12		1006	131.43	218.42	30.5		826	105.59	72.51	32.34		851	98.81	111.86	27.85
834	6.16	238.12	35.52		1006	132.04	219.02	32.51		826	106.79	72.87	28.09		851	99.58	111.69	25.51
834	6.11	237.96	36.92		1006	132.8	216.84	30.76		826	105.94	71.68	30.26		856	86.1	22.76	13.41
834	6.34	237.77	36.1		1006	131.55	220.69	29.44		826	105.86	71.61	30.66		856	85.77	21.58	16.35
834	6.74	238.5	35.56		1006	132.27	220.57	30.7		826	106.27	72.62	28.28		856	85.1	24.53	13.41
834	7.23	238.08	37.72		1006	132.71	219.82	29.77		826	105.32	72.27	32.42		856	84.02	21.5	16.19
842	4.41	136.5	15.46		1006	131.88	219.89	28.89		838	135.44	108.43	7.57		861	248.72	154.25	18.24
842	4.3	135.7	14.19		1006	132.95	219.62	30.11		838	136.81	107.04	14.83		861	249.39	155.67	16.83
842	4.38	136.23	15.75		1006	132.26	220.27	29.58		838	137.41	106.33	16.58		861	247.91	154.39	22.32
842	4.2	136.2	15.79		1006	131.53	219.06	30.35		838	137.33	106.79	18.37		861	249.97	154.22	17.21
842	3.78	137.24	14.32		1006	131.74	220.57	30.33		838	137.43	106.68	18.79		865	134.54	169.6	26.71
842	4.04	137.23	13.02		1006	132.62	222.43	27.29		838	137.41	107.94	16.87		865	134.51	168.35	27.19
842	4.13	136.67	14.5		1006	132.77	221.31	28.45		838	137.2	108.8	18.19		865	133.63	169.55	30.05
850	33.12	51.78	15.7		1006	132.36	221.29	28.8		838	136.49	108.29	16.47		869	65.83	91.76	32.42
850	35.71	52.11	16.67		1010	71.21	247.86	29.19		838	136.24	108.69	17.09		869	65.07	93.28	33.94
850	38.42	51.62	18.6		1010	72	248.17	28.2		838	135.92	109.81	16.23		869	66.15	92.99	34.31
850	40.39	51.37	20.54		1010	74.8	246.75	34.15		838	135.83	109.51	16.06		873	212.06	74.83	41.65
850	42.68	52.07	18.67		1025	44.64	171.42	6.81		849	124.6	2.17	22.39		873	210.15	75.24	37.99
850	46.88	54.71	20.54		1025	47.52	169.43	7.53		849	125.09	1.68	24.66		873	209.96	74.43	38.77
850	47.01	55.59	19.75		1025	44.02	173.3	10.63		849	124.79	1.46	25.83		877	15.92	109.96	6.36
856	12.4	224.42	28.98		1025	45.36	171.71	7.59		849	125.3	2.09	25.78		877	19.18	111.09	6.26
856	13.92	223.73	30.92		1025	44.14	172.84	7.91		849	125.11	2.46	24.64		877	17.51	112.14	4.59
856	16.96	222.57	30.76		1025	40.95	172.86	4.52		849	124.91	2.19	25.17		898	85.6	31.57	14.92
856	20.94	221.67	30.08		1025	42.2	173.8	5.98		849	125.1	2.3	24.76		898	87.05	32.17	14.8
856	22.97	221.29	28.17		1025	43.19	174.46	6.51		849	125.18	2.16	25.93		898	85.33	33.73	14.71
862	27.48	122.5	12.74		1025	41.54	175.49	7.32		849	125.38	2.48	24.71		898	86.4	30.66	14.87
862	25.89	124.75	12.4		1025	43.97	174.89	6.5		849	126.44	1.68	24.39		898	84.55	33.71	11.28
862	29.22	124.32	12.9		1025	41.79	177.33	7.15		860	248.49	161.57	20.26		898	85.05	32.65	12.1
862	30.67	125.02	9.64		1025	43.66	174.91	6.44		860	249.07	160.06	20.82		898	85.97	32.5	11.82
862	30.81	125.19	10.59		1025	42.82	176.07	7.49		860	249.7	160.76	23.21		898	85.8	31.85	13.61
866	15.98	128.69	12.82		1025	44.54	174.41	5.4		860	249.94	160.15	22.42		898	86.78	32.12	14.37
866	14.31	130.56	13.21		1044	83.03	193.17	5.46		860	248.7	160.38	21.86		898	84.82	33.82	13.98
866	13.49	131.67	12.91		1044	82.65	193.22	7.36		860	247.83	160.81	22.41		898	87.62	30.82	13.7
869	231.25	103.5	3.53		1044	82.2	193.14	5.47		860	247	162.45	22.25		898	83.92	32.9	10.35
869	232.59	100.84	10.68		1044	81.5	193.44	3.08		860	245.98	162.49	22.59		898	86.22	32.85	12.7
872	2.13	122.07	3.69		1044	82.52	193.24	1.72		860	246.03	163.92	23.52		898	86.36	33.49	11.34
872	1.95	121.18	5.61		1044	82.2	193.02	2.86		860	247.55	165.46	22.59		898	85.71	31.64	12.05
875	3.44	17.76	9.84		1044	82.25	192.97	2.57		871	135.09	243.57	13.8		898	84.63	32.9	16.35
875	4.41	16.35	8.15		1044	81.66	191.55	3.3		871	136.28	243.59	13.89		898	85.93	33.76	13.05
878	219.44	18.57	13.45		1044	81.21	190.94	2.23		871	138.04	244.18	13.41		898	87.4	33.08	13.67
878	218.86	18.38	11.85		1044	81.01	190.66	2.31		871	138.79	244.43	11.39		898	86.16	31.69	12.21
881	183.18	39.58	21.75		1044	81.04	191.19	2.4		871	137.94	244.79	11.41		898	85.09	31.69	11.01
881	183.17	40.12	20.66		1044	81.29	190.96	1.69		871	136.16	244.75	11.02		905	18.5	164.54	20.11
884	191.09	87.65	14.53		1044	81.65	191.27	2.01		871	135.02	245.58	9.88		905	18.47	164.3	20.79
884	194.62	84.54	13.5		1044	81.65	191.7	1.49		871	135.28	245.64	8.94		905	17.85	163.59	22.49
887	186.03	94.96	16.05		1044	81.48	190.57	1.67		871	135.25	245.25	8.27		905	17.69	164.36	19.9
887	184.34	89.27	15.57		1044	81.8	191.72	1.69		871	135.36	245.98	9.44		905	17.43	164.09	21.74
890	212.53	92.56	19.15		1044	81.87	192.05	1.73		881	309.02	173.31	20.35		905	15.22	162.66	23.33
890	209.12	87.87	15.7		1044	81.76	192.51	1.17		881	307.41	172.03	22.87		917	91.88	119	25.2
893	68.02	157.37	26.47		1048	1.17	11.28	16.61		881	306.8	171.16	21.65		917	92.24	118.9	25.79
893	65.56	160.03	30.15		1048	0.857	12.51	15.78		881	308.03	172.18	21.46		917	93.85	117.23	28.95
896	218.96	91.01	13.11		1048	0.741	12.29	15.67		881	310.37	172.55	19.54		917	93.3	118.5	27.07
896	219.11	85.75	14.49		1051	155.3	65.72	6.23		881	306.63	171.64	21.43		917	94.6	117.35	26.91
899	249.08	54.82	15.09		1051	157.96	66.57	9.84		881	306.59	172.02	20.39		917	93.81	118.64	25.78
899	247.52	55.26	18.18		1056	106.92	199.37	18.31		881	306.02	171.45	20.45		917	94.54	118.02	27.89
902	46.3	96.63	22.77		1056	106.76	199.17	18.91		881	306.81	172	18.61		917	94.58	117.68	25.57
902	47.96	96.62	22.56		1056	112.35	195.88	18.52		891	268.71	201.2	20.78		917	96.69	113.78	27.47
906	249.53	230.83	35.56		1056	113.67	193.8	14.89		891	265.25	204.2	19.22		917	97.82	113.02	28.44
906	250.2	229.33	34.82		1066	149.17	195.73	40.25		891	262.35	205.77	17.37		917	99.55	110.72	28.26
906	251.38	228.81	31.59		1066	149.98	195.65	40.99		891	263.82	204.56	19.36		920	157.42	131.62	2.08
909	200.51	137.03	20.04		1066	149.19	196.83	41.71		891	265.76	203.79	18.52		920	156.29	132.11	0.886
909	198.53	136.74	19.71		1066	150.23	195.54	42.15		891	266.14	203.23	19.16		923	41.43	198.66	2.95
916	103.87	6.08	12.37		1066	150.06	195.79	41.65		891	268.17	200.8	22.45		923	40.82	198.28	2.85
916	103.21	6.78	10.68		1066	150.48	196.77	39.48		891	268.21	200.85	22.39		926	18.35	247.88	6.95
916	103.06	5.09	10.48		1066	150.81	196.88	38.79		891	268.69	201.38	20.9		926	18.28	248	7.56
916	102.49	5.88	10.32		1066	150.86	196.22	36.45		899	223.7	134.06	28.63		929	163.59	230.51	11.79
916	102.96	5.96	9.85		1066	150.3	196.66	39.14		899	222.35	135.64	26.63		929	162.98	230.91	14.4
916	103.04	6.5	11.59		1069	63.05	164.24	14.75		899	221.47	136.49	26.01		933	135.23	95.8	6.45
921	200.44	199.96	5.23		1069	62.78	164.99	13.75		899	222.51	137.01	25.73		933	136.75	97.96	5
921	198.38	199.29	4.79		1075	113.1	195.33	18.49		899	220.57	140.8	23.99		933	136.72	96.32	6.04
921	194.87	199.93	5.13		1075	111.97	195.4	17.87		899	219.66	141.31	22.6		937	234.42	199.32	5.11
921	193.78	199.45	4.12		1075	112.24	194.46	18.71		899	218.59	141.22	21.73		937	234.92	199.2	4.94
930	70.68	46.72	14.63		1075	112.45	195.89	19.37		906	157.08	205.03	9.04		937	235.19	198.93	4.46
930	69.45	43.94	13		1075	113.52	192.71	14.84		906	157.47	205.95	7.08		979	83.06	179.81	3.01
930	70.7	45.24	10.59		1078	128.84	129.11	30.24		906	159.22	207.99	5.78		979	82.95	179.89	2.16
930	70.37	44.65	12.51		1078	126.21	129.49	27.76		906	158.29	205.84	6.86		979	83.28	180.08	1.93
930	69.81	43.87	11.63		1086	69.95	247.1	30.05		906	158.21	206.62	6.65		979	82.71	179.56	3.29
930	68.69	44.14	9.95		1086	70.44	246.77	31.5		906	159.42	207.69	5.62		979	82.35	179.34	2.26
930	68.59	45.42	10.22		1086	73.2	246.15	29.94		913	145.95	4.15	50.2		979	82.14	179.08	3.22
930	68.94	45.4	10.12		1086	71.95	247.24	28.31		913	147.56	5.63	48.32		979	82.82	178.29	2.66
941	186.92	103.76	22.03		1086	69.85	248.53	30.54		913	150.2	5.44	44.56		979	81.8	176.49	4.04
941	187.5	96.99	21.75		1086	70.22	248.67	28.14		913	150.53	5.85	40.71		979	82.76	177.42	2.96
941	188.57	95.45	20.1		1086	71.65	247.19	29.31		913	150.65	4.53	41.53		979	84.16	176.44	2.75
941	189.34	96.99	20.59		1101	55.69	1.55	27.67		913	151.91	6.7	39.41		979	82.93	177	2.99
941	190.2	99.13	21.65		1101	55.07	0.865	24.56		919	121.79	213.54	5.58		979	83	177.78	3.69
941	188.6	98.54	22.96		1101	54.47	1.07	24.34		919	121.71	212.02	6.41		979	82.59	177.45	4.54
941	189.5	96.96	21.37		1101	54.12	1.17	22.97		919	121.32	212.53	5.96		979	83.68	176.51	3.43
941	187.63	99.48	20.13		1101	53.32	1.38	21.07		919	120.63	213.18	5.47		979	84.13	174.3	5.11
941	187.29	100.87	22.29		1101	53.22	1.31	19.16		919	120.2	213.35	5.37		979	83.88	177.43	1.98
941	188.86	105.17	18.46		1101	55.09	1.79	18.58		925	248.39	221.11	15.6		979	82.82	175.95	2.84
944	199.41	75.03	11.22		1101	54.39	1.44	19.37		925	249.22	221.35	15.07		979	83.65	174.58	5.04
944	200.24	76.38	10.66		1101	55.11	2.01	18.71		925	249.88	220.44	16.12		979	84.54	172.97	4.46
947	148.34	237.71	18.17		1101	54.35	1.51	19.79		925	252.37	219.62	18.03		979	84.64	172.29	3.31
947	148.94	237.26	20.97		1101	55.3	1.52	17.55		925	249.86	219.18	19.46		979	85.13	172.52	4.06
950	154.58	95.15	27.03		1101	54.93	1.15	15		931	164.67	6.93	25.71		979	82.06	173.33	3.25
950	153.83	93.55	20.69		1101	54.65	1.63	17.76		931	165.67	7.97	23.85		979	79.9	172.47	3.9
953	88.79	5.55	37.86		1101	55.14	1.11	16.48		931	164.14	7.58	25.35		979	78.76	172.03	2.7
953	90.11	5.43	36.51		1104	159.87	16.08	9.82		931	166.81	8.07	23.05		979	79.3	172.82	2.56
1025	190.56	2.3	10.64		1104	158.92	17.29	9.96		931	166.29	7.47	23.1		979	78.72	171.89	3.33
1025	190.18	2.94	9.12		1109	242.08	232.73	7.98		936	305.49	247.24	35.32		979	79.6	173.27	2.78
1025	190.56	4.2	8.25		1109	242.35	232.62	7.3		936	305.57	248.07	37.87		979	79.33	173.77	2.64
1025	189.68	4.91	8.5		1109	242.1	232.61	7.33		936	304.95	247.66	38.13		979	77.57	172.99	2.99
1025	190.49	4.45	9.66		1109	240.69	232.5	8.54		936	305.16	247.94	35.83		979	80.17	174.61	3.11
1025	190.58	5.12	9.59		1112	90.05	88.27	19.83		940	134.6	66.77	23.9		979	80.14	174.37	3.53
1025	189.89	5.16	9.18		1112	90.89	87.85	20.05		940	133.62	68.02	24.09		979	79.65	175.87	3.11
1025	189.66	5.26	8.79		1115	60.76	163.05	14.72		940	134.9	66.44	24.71		979	80.11	176.18	3.66
1025	189.64	6.49	8.69		1115	61.3	164.09	16.9		944	169.53	93.12	39.15		979	79.43	176.02	2.8
1025	189.28	7.04	9.77		1118	152.06	242.7	32.19		944	170.73	92.4	35.27		979	80.41	177.28	3.17
1025	189.97	7.89	9.93		1118	151.67	241.92	31.38		944	169.64	93.02	38.94		979	81.57	177.28	4.38
1025	190.17	9.49	9.12		1123	94.6	121.45	14.84		948	191.32	161.7	51.16		979	82.83	176.93	3.28
1025	190.27	9.49	10.66		1123	94.21	125.63	13.11		948	188.14	162.06	47.43		979	82.85	178.21	2.76
1025	189.74	9.84	9.81		1123	96.61	128.9	11.43		948	189.91	162.01	45.25		979	84.75	176.86	5.54
1025	189.01	8.29	10.51		1123	96.48	127.41	9.74		951	211.04	74.32	26.18		979	86.15	174.65	3.24
1025	188.44	8.85	10.99		1126	152.98	67.88	5.67		951	211.24	76.23	24.26		979	88.9	169.33	6.67
1025	188.96	8.21	10.51		1126	154.79	68.1	6.99		954	39.11	81.63	25.75		982	96.76	239.15	4.82
1025	188.93	7.09	11.5		1131	232.15	166	23.33		954	40.06	80.18	25.89		982	97.3	238.8	2.07
1025	190.38	5.69	10.41		1131	232.6	166.2	22.81		963	177.49	59.57	31.14		987	133.87	162.12	26.39
1025	190.35	5.79	10.34		1131	233.16	166.6	23.02		963	176.9	60.19	31.25		987	133.88	163.28	28.21
1025	192.36	4.85	9.57		1131	233.16	166.98	17.74		963	178.06	61.14	29.73		987	134.88	166.13	26.41
1025	192.27	5.82	8.6		1142	108.43	185.54	21.2		963	176.75	60.65	31.1		987	134.08	164.24	25.43
1025	192.5	5.46	8.14		1142	109.33	188.1	22.22		963	177.97	60.25	31.59		992	67.12	88.25	34.69
1025	191.65	6.41	8.26		1142	109.47	189.54	24.6		963	176.94	60.56	31.38		992	67.44	89.13	33.48
1025	192.53	6.39	6.77		1142	112.04	191.23	24.06		963	177.59	60.16	31.15		992	66.37	86.56	38.35
1025	192.44	6.94	7.74		1142	110.68	190.02	18.77		963	177.49	60.99	30.75		992	66.84	89.22	35.18
1025	193.16	5.99	8.43		1142	112.58	191.79	19.68		966	102.79	213.62	30.54		996	218.73	100.13	9.68
1025	192.78	5.98	9.08		1142	114.18	192.48	20.06		966	105.27	214.97	24.38		996	215.53	99.39	10.77
1025	191.22	6.54	7.23		1142	114.99	193.48	21.41		970	321.43	301.68	28.99		996	215.22	101.14	9.72
1025	190.74	6.5	7.54		1142	113.32	192.97	19		970	321.86	298.25	30.69		1003	54.6	218.3	3.86
1025	191.02	6.62	6.84		1142	114.36	194.62	18.45		970	323.23	296.9	29.43		1003	54.44	218.01	3.13
1025	190.42	7.24	8.19		1146	160.18	15.72	11.38		978	125.64	229.51	14.04		1003	56.62	217.86	4.91
1025	186.68	10.85	8.8		1146	159.18	16.58	10.92		978	125.65	228.62	15.12		1003	55.13	219.07	1.63
1025	189.74	7.91	9.07		1146	158.28	15.42	10.71		978	126.05	229.77	16.01		1003	55.66	220.42	3.62
1025	189.28	7.73	9.23		1156	64.18	63.79	5.68		978	125.21	229.8	19.09		1003	56.39	220.09	4.21
1025	188.27	8.29	9.74		1156	63.23	64.21	4.42		978	125.12	228.52	17.24		1006	16.78	250.5	7.94
1025	188.5	9.34	10.08		1156	63.59	64.53	5.84		978	127.36	227.78	16.11		1006	17.94	248.85	8.74
1025	188.73	8.76	10.8		1156	63.48	63.86	4.21		978	126.35	227.59	17.69		1009	163.7	230.45	15
1025	N/A	N/A	N/A		1156	64.08	64.73	1.57		985	165.25	216.48	23.24		1009	165	235.25	15.28
1025	187.89	10.09	10.81		1156	63.94	64.93	1.06		985	161.99	216.64	23.95		1012	32.32	180.22	34.43
1025	187.09	10.19	10.39		1156	62.96	65.95	1.24		985	163.92	214.59	21.18		1012	30.97	177.9	32.65
1025	188.26	10.36	10.71		1156	64.11	65.01	1.47		985	161.94	213.86	26.03		1016	80.98	1.17	22.55
1025	188.69	10.04	8.54		1156	64.03	66.06	1.15		985	163.28	210.3	24.68		1016	82.24	4.6	29.29
1025	188.51	10.27	8.81		1166	182.67	48.67	5.75		985	163.17	210.25	24.43		1016	79.52	1.03	23.93
1025	187.68	10.03	8.69		1166	182.44	49.17	4.35		994	136.93	169.1	18.76		1055	79.8	154.82	11.42
1025	186.08	10.18	7.83		1166	182.49	48.82	4.81		994	136.82	168.18	24.94		1055	79.98	156.29	10.03
1025	187.01	10.87	9.41		1166	181.73	48.98	3.5		994	136.86	166.18	28.66		1055	80.31	154.82	10.97
1025	187.68	10.91	8.54		1166	179.93	51.07	1.31		994	135.85	162.98	26.97		1055	80.34	154.79	11.5
1025	188.17	10.79	8.53		1166	177.98	50.99	1.1		994	136.39	162.26	26.97		1055	81.11	154.78	8.98
1025	188.31	11.35	9.32		1166	179.22	51.66	0.987		994	136.68	158.17	26.45		1055	80.52	155.28	12.27
1025	187.46	11.17	9.91		1166	179.96	50.63	0.955		994	137.57	157.92	26.53		1055	80.38	155.09	12.91
1025	188.5	10.77	8.37		1166	185.14	48.53	1.18		994	138.84	155.85	26.17		1055	81.38	154.29	10.03
1025	188.06	9.64	9.39		1170	94.75	130.02	14.78		1003	162.27	27.13	32.27		1055	80.83	153.61	10.96
1025	187.7	10.55	9.03		1170	95.78	129.35	13.26		1003	161.63	27.64	37.22		1055	82.17	152.48	10.08
1025	189.19	9.73	9.15		1170	96.09	130.01	12.82		1003	161.61	27.92	37.85		1055	80.55	153.69	11.25
1025	188.99	10.65	9.82		1175	242.14	231.19	10.6		1003	162.84	27.09	36.68		1055	81.54	154.24	12.85
1025	191.63	10.63	10.15		1175	241.79	232.52	8.89		1003	161.59	27.26	36.72		1055	81.2	153.73	10.86
1025	193.38	11.18	10.89		1175	241.58	231.72	9.45		1003	162.37	27.03	35.95		1055	82.34	153.25	10.74
1025	195.9	12.29	10.98		1175	241.21	234.38	10.43		1003	162.05	28.32	36.82		1055	81.71	153.07	10.42
1025	197.13	14.28	9.73		1179	99.8	122.44	15.17		1003	161.79	28.52	37.34		1055	81.97	153.63	11
1025	198.36	16.21	9.57		1179	99.57	122.23	15.24		1006	217.49	3.71	53.98		1055	81.8	153.74	10.69
1025	201.9	17.5	9.78		1179	98.73	123.63	13.65		1006	215.54	6.07	57.14		1055	81.99	153.95	11.58
1025	203.3	18.9	9.82		1189	88.63	120.56	24.32		1013	77.86	241.21	3.89		1055	83.14	153.85	10.5
1025	204.4	18.92	9.49		1189	90.16	121.92	23.99		1013	78.13	241.54	3.09		1055	82.37	154.77	9.56
1025	206.56	18.77	8.92		1189	88.9	121.31	24.18		1013	78.84	240.49	3.07		1055	81.37	154.39	11.13
1025	210.35	19.62	8		1189	89.41	121.37	22.97		1013	78.65	241.47	2.86		1055	81.82	154.02	12.25
1025	212.68	18.76	8.15		1189	89.05	122.26	17.99		1013	78.79	241.15	2.75		1055	81.77	153.95	13.23
1025	211.75	19	7.39		1189	88.85	121.66	17.9		1013	77.76	241.82	3.15		1055	81.96	154.59	11.57
1025	208.65	18.53	6.61		1189	87.9	122.02	17.22		1017	149.95	204.4	32.63		1055	82.97	153.95	12.35
1025	211.51	18.26	8.26		1189	89.49	121.57	16.77		1017	150.7	204.93	31.02		1055	82.48	153.71	12.11
1025	212.61	19.32	5.86		1189	88.38	122.82	17.13		1017	149.99	205.34	32.57		1055	82.42	154.71	10.37
1032	216.98	29.3	10.03		1194	90.18	88.52	26.4		1020	109.76	81.56	26.43		1055	81.28	153.97	11.88
1032	214.78	29.86	4.82		1194	90.12	88.29	24.8		1020	110.61	81.67	25.85		1055	81.57	155.17	11.47
1032	217.8	29.61	12.17		1194	90.46	88.16	23.43		1032	178.43	152.51	55.11		1055	81.85	154.07	10.12
1032	216.91	29.37	8.03		1194	90.35	88.78	21.78		1032	185.04	155.15	55.8		1055	81.28	155.31	11.98
1032	215.86	29.32	5.67		1197	252.37	248.61	4.29		1032	187.43	155.9	54.48		1055	80.99	154.32	12.91
1032	216.66	29.37	6.01		1197	250.17	251.4	9.56		1032	185.8	157.63	54.08		1055	81.97	153.66	13.92
1035	2.77	119.33	9.12		1201	184.87	46.87	2.09		1032	183.02	158.5	51.01		1055	82.94	154.02	11.7
1035	2.15	119.17	4.2		1201	183.33	47.68	1.04		1032	182.31	157.51	53.82		1055	82.83	153.21	11.11
1038	185.22	190.96	4.88		1201	185.99	47.29	1.44		1032	184.26	157.89	56.16		1055	82.08	154.29	11.57
1038	183.39	193.82	4.96		1209	177.76	76.64	3.91		1032	185.9	157.77	57.8		1055	81.21	154.34	14.3
1044	6.29	16.55	8.5		1209	178.64	76.66	3.06		1032	187.46	157.2	55.44		1055	82.35	153.57	10.95
1044	5.78	16.12	10.22		1209	178.21	76.7	3.18		1032	192.13	157.96	52.85		1058	151.9	205.15	11.92
1044	2.25	19.8	7.83		1209	178.49	77.01	2.21		1032	192.01	158.3	50.81		1058	152.31	206.08	12.61
1044	5.8	16.05	7.23		1209	178.81	76.47	1.9		1039	193.17	19.3	39.25		1063	141.89	178.41	32.24
1044	4.1	17.95	10.17		1209	180.05	75.9	1.84		1039	194.01	20.29	45.47		1063	141.45	176.39	28.41
1047	185.19	43.47	21.25		1209	179.67	75.8	2.48		1039	194.73	20.72	47.67		1063	143.81	179.95	32.7
1047	182.43	41.4	20.19		1213	152.81	67.3	10.05		1039	195.56	21.7	48.76		1063	143.14	179.44	33.2
1050	69.98	192.02	13.4		1213	152.52	67.61	7.09		1039	196.25	23.2	50.93		1074	19.65	163.72	18.27
1050	70.62	193.17	10.71		1213	152.89	67.87	7.85		1039	198.37	23.05	53.64		1074	19.87	164.24	19.86
1053	244.09	35.45	28.62		1219	49.65	167.38	15.48		1050	111.87	88.28	48.91		1074	18.96	163.97	22.08
1053	243.31	36.88	25		1219	48.6	168.31	12.34		1050	111.84	89.92	49.06		1074	19.42	164.11	20.07
1056	243.53	73.35	13		1219	49.39	167.33	12.65		1050	111.56	91.93	49.88		1074	18.93	162.76	23.43
1056	239.94	72.4	18.75		1219	49.41	167.88	12.5		1050	111.19	93.79	46.82		1074	19.11	163.3	21.19
1076	68.78	157.02	26.76		1219	46.97	169.36	9.65		1050	112.37	94.35	52.81		1074	19.05	163.58	21.55
1076	69.91	158.18	28.4		1222	140.72	168.46	27.25		1050	112.49	94.08	56.59		1074	18.07	165.09	19.78
1076	67.72	159.8	29.62		1222	140.92	169.67	28.08		1050	113.68	93.92	58.14		1074	18.66	163.28	22.08
1076	68.58	158.27	24.42		1226	115.94	64.11	6.43		1050	114.13	93.85	54.86		1074	17.87	164.62	22.23
1076	69.87	155.53	24.61		1226	116.44	67.28	6.82		1050	112.97	93.12	55.74		1242	20.41	160.79	2.36
1076	69.9	155.48	24.46		1226	114.86	64.42	5.05		1050	111.45	95.3	57.74		1242	19.79	158.17	5.63
1076	70.29	153.13	22.46		1231	177.5	124.88	2.07		1053	120.68	110.45	25.07		1242	18.65	156.53	6.11
1076	69.67	152.43	24.69		1231	175.18	126.65	1.33		1053	120.94	110.52	27.23		1242	18.31	156.94	5.92
1076	71.31	150.76	25.13		1231	174.97	126.82	1.23		1061	304.55	245.23	36.95		1242	16.11	157.24	6.52
1076	71.16	151.5	23.54		1231	177.61	125.25	1.07		1061	304.55	246.51	32.05		1242	17.66	156.2	6.65
1076	70.6	152.44	24.33		1235	242.44	231.76	14.9		1061	304.34	245.49	37.02		1242	18.42	155.07	6.39
1076	69.6	152.39	26.68		1235	241.83	233.04	16.48		1061	305	246.79	39.07		1242	19.16	154.56	5.17
1076	70.13	152.34	23.86		1235	242.28	233.08	15.4		1061	305.3	246.25	40.19		1242	18.77	155.01	6.2
1076	70.29	152.23	22.31		1238	183.54	121.74	1.3		1061	305.97	246.79	37.93		1242	18.22	155.09	5.52
1076	69	155.29	23.17		1238	182.37	121.85	1.68		1061	306.24	247.34	36.92		1242	18.58	155.02	6.25
1076	68.48	156.06	25.51		1242	112.73	124.71	24.41		1067	222.57	142.83	20		1242	18.93	154.73	7.12
1076	67.94	157.37	25.02		1242	112.97	125.09	24.27		1067	222.65	143.03	24.21		1242	19.1	154.31	6.59
1076	66.78	158.42	30.89		1242	111.98	123.86	23.94		1067	217.6	147.28	27.39		1242	19.1	153.85	8
1076	67.27	158.5	25.05		1245	78.9	199.41	12.35		1067	218.41	146.17	26.89		1242	19.69	153.37	6.44
1079	189.63	87.39	12.38		1245	79.17	199.22	10.94		1067	215.57	151.23	25.65		1242	20.01	152.91	7.82
1079	191.44	88.22	16.03		1248	241.81	235.13	17.12		1102	230.55	118.53	20.85		1242	19.43	152.45	7.35
1083	232.89	66.13	12.75		1248	242.53	235.68	15.88		1102	229.57	119	21.09		1242	19.67	152	7.78
1083	234.03	65.71	9.53		1251	150.8	65.99	13.98		1102	230.37	119.47	20.27		1242	19.16	152.43	9.09
1083	236.54	64.44	12.95		1251	153.46	68.09	10.58		1102	230.83	118.68	19.73		1242	18.09	152.85	8.13
1088	205.32	97.22	8.51							1102	230.99	119.21	21.98		1242	18.31	152.65	9.22
1088	206.53	92.22	13.32							1102	231.41	120.45	19.94		1242	18.27	152.2	8.21
1088	210.04	89.64	13.26							1102	231.25	119.56	22.56		1242	18.88	152.16	8.95
1088	213.07	88.67	16.63							1102	231.33	119.47	21.24		1242	19.26	151.3	7.73
1094	238.35	57.47	15.72							1102	231.63	118.73	22.59		1242	19.22	150.79	9.41
1094	245.36	56.24	19.25							1102	231.94	118.77	21.65		1242	17.69	152.37	8.23
1094	243.03	52.15	22.61							1102	231.18	118.6	23.3		1242	17.56	152.33	7.97
1094	241.6	53.56	15.94							1102	231.72	118.31	20.9		1242	16.61	152.92	8.84
1094	241.34	50.05	16.89							1102	231.01	118.68	27.99		1242	16.91	153.15	8.72
1098	44.32	88.68	27.24							1102	231.02	118.87	29.21		1242	16.81	153.81	7.88
1098	45.3	89.03	26.44							1102	231.64	119.09	30.33		1242	16.63	154.63	7.74
1098	45	88.11	23.69							1102	231	119.63	29.15		1242	15.41	155.02	6.58
1101	99	117.63	22.12							1102	231	119.82	27.96		1242	15.43	156.41	5.98
1101	99.33	116.25	25.92							1102	231.02	120.04	29.29		1242	13.99	157.13	6.02
1104	244.43	236.32	35.45							1102	230.73	118.67	24.78		1242	13.65	158.17	6.15
1104	244.2	236.67	37.72							1102	230.7	118.95	23.32		1242	12.88	158.27	5.27
1107	212.52	79.72	13.05							1102	231.14	119.31	22.54		1242	12.37	158.94	4.28
1107	214.44	86.5	13.11							1102	230.1	123.21	28.66		1242	12.6	159.17	5.11
1126	2.42	237.18	36.53							1102	229.65	119.08	24.81		1242	13.33	158.67	5.38
1126	2.13	237.72	36.66							1102	229.1	121.13	26.06		1242	12.66	157.71	5.89
1126	3.37	237.55	36.01							1102	230.34	119.72	24.95		1242	11.97	158.03	7.3
1126	3.87	237.61	36.09							1102	230.57	119.34	25.47		1242	12.34	160.09	8.43
1126	3.86	237.5	36.78							1102	231.21	118.84	23.04		1242	12.99	160.84	6.04
1126	3.61	237.77	36.85							1102	230.47	120.33	24.45		1242	14.47	161.12	5.81
1126	4.13	237.77	37.72							1102	228.95	121.19	23.88		1242	16.15	160.94	6.37
1126	3.98	237.67	36.87							1102	227.16	123.16	17.64		1242	16.7	161.08	6.05
1126	7.23	233.7	36.85							1102	228.09	125.05	23.59		1242	18.14	162.07	3.98
1126	7.05	233.89	35.66							1102	227.04	127.13	26.4		1242	18.58	161.99	4.15
1126	7.42	233.1	36.07							1102	225.91	129.6	29.23		1242	19.63	163.33	3.12
1126	7.46	233.07	36.11							1102	227.41	125.93	26.58		1242	20.21	164.83	3.19
1126	6.43	234.47	37.2							1105	152.72	156.8	19.74		1242	19.9	166.05	2.5
1126	5.63	235.54	37.05							1105	153.54	156.72	22.64		1242	20.56	167.96	2.91
1126	6.08	234.28	34.44							1116	156.38	202.75	5.57		1242	21.64	169.25	2.64
1126	5.7	233.76	32.27							1116	158.38	204.01	9.65		1242	22.01	170.53	3.53
1126	7.17	229.39	31.26							1116	160.93	204.09	14.97		1242	21.51	172.11	4.26
1126	7.17	228.02	31.78							1116	158.88	206.3	11.62		1242	21.6	172.65	4.5
1130	198.92	193.13	9.13							1116	158.12	206.86	12.84		1242	21.98	173.6	5.18
1130	202.86	194.44	9.78							1116	155.11	209.27	12.92		1242	22.01	174.65	5.78
1130	203.61	194.68	7.4							1116	154.39	209.45	14.58		1242	22.12	175.38	6.15
1134	160.72	110.95	6.13							1116	154.33	204.57	18		1242	22.14	176.33	6.86
1134	160.04	112.19	7.72							1116	155.61	204.79	17.89		1242	22.04	176.82	7.39
1134	161.64	113.43	9.63							1116	153.68	205.36	21.19		1242	21.1	177.71	7.13
1137	249.86	48.82	17.29							1119	334.45	22.39	61.52		1242	21.38	177.69	7.49
1137	250.18	49.8	18.9							1119	331.82	20.95	59.92		1242	21.57	177.88	8.43
1140	239.97	65.28	29.1							1123	249.96	222.29	11.33		1242	21.43	178.2	8.98
1140	238.19	61.82	28.89							1123	247.56	219.76	14.86		1242	21.03	178.82	7.75
1143	2.36	119.7	6.94							1123	247.25	219.18	17.14		1242	20.2	179.72	8.57
1143	3.02	120.54	6.76							1128	139.93	270.65	13.52		1242	20.09	179.98	8.23
1147	188.27	85.36	12.16							1128	139.16	270.21	20.3		1242	19.52	180.9	8.99
1147	184.73	87.11	18.67							1128	138.82	269.77	24.84		1242	19.26	181.3	7.6
1147	188.75	82.1	22.94							1128	139.38	271.63	23.24		1242	19.25	181.74	7.85
1150	211.84	93.96	19.68							1133	211.37	76.35	16.83		1242	20.17	182.04	8.38
1150	210.65	90.33	14.47							1133	211.65	75.45	22.9		1242	20.74	182.4	7.98
1156	5.11	134.82	17.82							1133	209.99	75.7	25.66		1242	21.12	181.89	8.74
1156	5.09	135.04	16.78							1133	210.94	74.86	28.88		1242	21.39	182.67	7.59
1156	4.74	135.97	17.32							1154	121.22	195.46	21.99		1242	21.95	183.17	8.34
1156	4.22	136.87	16.55							1154	121.58	194.9	20.7		1242	21.69	183.48	8.37
1156	4.5	136.51	14.2							1154	123.28	197.31	14.08		1242	21.74	183.63	8.09
1164	31.72	53.22	27.81							1154	123.21	197.66	13.58		1242	21.96	184.04	8.62
1164	33.94	52.74	24.41							1154	120.62	197.76	15.08		1242	22.25	183.92	8.45
1164	33.46	51.95	21.18							1154	122.77	197.3	13.67		1242	22.18	184.28	7.87
1164	30.71	51.49	22.89							1154	121.64	196.71	14.41		1242	21.87	184.41	8.18
1164	33.82	51.43	20.12							1154	119.96	196.61	12.61		1242	22.03	184.81	7.32
1164	33.25	51.66	18.7							1154	120.73	195.97	9.96		1242	22.46	184.91	7.95
1164	32.38	51.73	17.3							1154	119.26	195.97	10.03		1242	23.34	185.49	7.57
1176	18.91	117.45	8.72							1154	120.23	196.15	9.58		1242	23.66	185.65	7.79
1176	19.28	117.81	8.93							1154	120.26	196.01	10		1242	24.43	186	7.67
1176	20.31	118	9.29							1154	118.41	197.01	10.68		1242	25.09	186.09	7.22
1176	20.7	118.08	8.98							1154	120.55	195.97	8.54		1242	26.93	185.54	8.53
1176	22.74	117.95	11.84							1154	119.66	196.08	7.75		1242	28.11	185.79	9.05
1176	24.31	117.73	11.51							1154	120.51	195.56	7.36		1242	28.79	186.16	7.27
1176	25.56	118.57	14.27							1154	119.6	197.03	7.56		1242	29.39	186.42	7.83
1176	25.69	118.55	14.28							1154	115.86	198.26	2.55		1242	29.92	186.77	6.55
1176	26.24	119.02	13.27							1154	116.89	196.71	8.09		1242	30.58	187.42	6.71
1176	26.71	119.74	11.49							1154	117.93	196.85	9.81		1242	30.79	187.8	6.6
1176	27.01	119.54	10.9							1160	122.34	232.5	9.04		1242	31.12	187.71	7.32
1179	225.64	91.75	9.92							1160	120.71	234.53	8.49		1242	30.61	187.71	5.01
1179	225.84	93.84	12							1160	121.25	234.14	3.86		1242	31.09	188.47	5.03
1191	13.06	129.26	16.32							1160	122.68	233.5	8.89		1242	31.83	189.05	6.46
1191	13.79	129.15	14.16							1160	121.88	236.78	10.23		1242	31.91	189.62	5.82
1191	11.07	130.84	15.13							1164	303.69	171.63	9.76		1242	32.86	190.09	6.49
1191	10.78	130.7	15.22							1164	303.99	170.72	16.54		1242	33.75	190.77	5.03
1191	11.16	130.87	17.65							1164	301.72	170.32	20.93		1242	34.73	191.23	5.84
1191	10.14	131.43	15							1168	160.52	218.44	12.07		1242	34.71	191.71	5.37
1191	15.47	129.27	15.93							1168	161.43	218.79	17.67		1242	35.3	192.27	5.39
1191	16.33	130.46	15.41							1168	164.58	217.53	14.49		1242	35.58	192.5	4.11
1191	16.28	127.91	14.74							1172	262.35	206.14	6.22		1242	35.99	192.81	5.27
1191	16.63	128.85	15.08							1172	263.42	205.84	13.84		1242	36.01	192.3	5.04
1191	16.71	128.13	13.89							1172	261	206.88	15.43		1242	35.73	192.35	4.79
1211	16.89	147.33	31.78							1175	105.39	216.28	15.93		1242	36.22	192.76	5.4
1211	16.93	147.02	31.79							1175	104.81	216.32	18.11		1242	36.39	193.5	5.34
1211	16.74	147.02	31.8							1178	120.1	110.97	24.68		1242	37.08	194.4	4.76
1211	16.63	146.53	31.7							1178	120.66	110.84	26.55		1242	37.48	194.5	5.19
1211	16.02	146.42	32.57							1181	163.76	8.02	12.91		1242	37.79	194.95	5.42
1211	14.69	145.55	33.39							1181	163.63	7.63	20.39		1242	37.59	195.33	5.94
1211	13.16	146.15	34.85							1185	170.88	92.71	34.33		1242	38.32	195.66	5
1211	12.85	147.05	35.15							1185	169.2	93.51	31.36		1242	38.55	196.06	5.55
1211	13.6	147.07	36.31							1185	166.73	93.33	36.52		1242	38.9	196.22	5.38
1211	14.45	146.5	36.86							1188	128.51	200.89	48.38		1242	39.43	196.74	5.64
1211	15.1	146.07	38.05							1188	130.72	199.96	53.14		1242	39.59	196.55	5.67
1211	15.17	145.41	37.16							1192	251.41	162.41	18.17		1242	39.57	196.89	6.25
1211	15.95	143.62	38.61							1192	249.47	164.33	15.09		1242	41.98	203.2	4.04
1211	16.71	143.54	38.62							1192	248.8	162.74	11.37		1242	39.87	198.18	6.65
1211	17.16	143.4	40.28							1204	103.12	213.7	27.79		1242	39.89	198.71	5.66
1211	17.93	143.04	39.85							1204	102.71	212.55	25.5		1242	39.65	198.6	5.03
1211	19.92	140.84	40.38							1204	103.43	210.91	23.28		1242	41.41	202.58	4.96
1211	21.97	137.74	38.33							1204	105.13	210.67	19.58		1242	41.58	202.65	6.06
1211	21.89	137.88	37.63							1204	104.21	212.11	17.96		1242	41.37	203.12	5.91
1215	172.95	7.39	30.6							1204	104.54	211.85	17.83		1242	39.57	200.26	5.67
1215	175.3	7.78	26.81							1204	105.97	212.48	16.51		1242	40.89	203.62	5.11
1215	171.75	6.14	25.21							1204	106	215.2	14.46		1242	39.81	203.71	4.89
1219	180.16	37.25	24.66							1204	105.6	215.42	14.41		1242	41.05	203.99	5.09
1219	180.57	37.76	23.87							1204	104.88	215.13	15.07		1242	39.78	203.49	6.08
1219	179.6	38.13	24.9							1204	104.24	215.4	7.78		1242	40.68	204.41	6.01
1222	206.33	88.92	17.88							1365	183.89	56.16	14.66		1242	40.48	203.9	5.46
1222	209.65	84.28	20.29							1365	184.07	56.11	16.6		1242	38.41	203.58	4.79
1225	250.15	64.47	13.03							1365	184.31	56.39	15.13		1242	38.61	203.97	5.35
1225	247.45	59.34	11.07							1365	183.08	55.87	13.98		1242	38.87	203.81	4.59
1228	222.3	97.52	14.28							1365	182.82	55.96	14.17		1242	37.38	204.94	4.14
1228	221.3	95.95	8.48							1365	183.5	56.26	14.45		1242	37.69	205.35	4.17
1243	50.67	136.55	8.51							1365	182.86	55.36	14.05		1242	37.11	205.86	3.97
1243	51.96	136.53	6.34							1365	183.39	55.43	15.58		1242	37.7	206.48	4.15
1243	51.89	136.19	6.54							1365	182.83	55.29	15.77		1242	37.32	206.93	4.12
1243	51.37	136.65	6.22							1365	183.02	55.86	17.73		1242	38.1	206.81	4.27
1243	51.46	136.95	6.83							1365	183.69	55.77	17.95		1242	37.67	207.27	4.57
1243	50.34	136.55	5.74							1365	183.05	55.45	17.21		1242	38.08	207.42	4.54
1243	51.36	137.64	8.93							1365	183.42	55.74	18.41		1242	38.39	207.66	3.88
1243	52.71	137.42	9.27							1365	183.13	55.82	19.75		1242	38.96	207.64	4.41
1243	51.28	136.18	7.12							1365	183.89	56.05	19.11		1242	38.72	208.13	4.17
1243	52.05	135.87	9.32							1365	183.12	55.49	18.41		1242	38.16	208.29	3.63
1243	52.23	136.58	8.99							1365	182.71	55.11	18.18		1242	37.91	208.61	3.62
1243	51.84	136.72	9.58							1365	182.44	55.56	19.21		1242	34.69	209.82	3.62
1243	52.09	136.65	10.5							1365	183.31	55.31	19.05		1242	34.56	209.9	3.25
1243	51.94	137.48	8.74							1365	183.04	55.59	19.38		1242	35.24	209.87	3.67
1249	102.13	8.17	19.53							1365	182.3	54.98	18.88		1242	38.36	208.64	3.43
1249	103.26	6.71	15.15							1365	181.84	53.9	22.6		1242	35.44	210.3	3.41
1249	102.74	7.27	18.01							1365	182.36	55.07	21.38		1242	35.8	210.53	3.73
1249	103.08	7.3	17.82							1365	182.3	54.56	22.59		1242	36.16	210.68	3.03
1249	102.25	8.22	16.75							1365	181.43	53.55	19.36		1242	36.57	211.34	2.39
1255	208.97	95.71	14.53							1365	182.54	55.15	20.84		1242	36.48	211.65	2.65
1255	205.32	90.83	12.63							1365	181.17	53.95	20.3		1242	39.71	207.82	2.76
1255	203.92	85.59	12.24							1365	182.32	54.13	21.42		1242	36.55	209.77	2.38
1255	204.26	92.83	12.22							1365	182.4	55.22	22.28		1242	38.83	207.07	3.7
1255	197.26	93.01	12.3							1365	182.66	55.1	21.67		1242	39.38	207.03	3.1
1349	154.38	115.67	7.84							1365	181.05	53.39	22.31		1242	37.53	208	3.32
1349	156.35	115.48	11.84							1365	182.22	54.63	22.45		1242	39.19	205.94	3.05
1349	155.6	116.01	17.16							1365	182.46	54.65	22.75		1242	36.4	209.73	2.54
1349	154.11	115.58	17.12							1365	182.43	55.26	20.44		1245	161.19	230.98	9.77
1349	154.91	114.84	19.95							1365	180.68	53.49	23.03		1245	161.73	231.53	14.39
1349	154.31	114.94	16.96							1365	181.64	53.95	23.12		1326	92.67	151.11	25.23
1349	153.65	114.8	12.63							1365	181.28	53.15	21.65		1326	90.92	152.01	29
1349	153.97	115	13.37							1365	181.98	54.81	24.52		1326	91.5	150.7	25.95
1349	153.28	115.6	18							1365	182.52	55.12	23.7		1326	91.97	149.35	25.27
1349	151.54	115.86	18.32							1365	181.32	53.6	24.09		1326	98.06	145.22	26.82
1349	151.95	115.89	14.36							1365	181.9	54.41	25.16		1326	99.05	142.9	26.35
1349	151.28	115.83	15.18							1365	181.33	54.46	22.62		1326	103.46	141.61	27.9
1349	150.73	115.97	16.11							1365	180.2	53.18	20.89		1326	104.25	140.35	29.31
1349	151.76	115.14	15.86							1365	181.46	54.34	21.88		1326	104.75	140.63	27.26
1349	151.34	115.13	16.87							1365	181.4	54.8	21.43		1326	109.21	142.11	27.47
1349	151.89	115.21	16.98							1365	181.23	54.4	23.62		1326	111.6	143.74	24.32
1349	152.37	116.26	13.82							1365	181.4	54.63	23.38		1326	113.03	143.36	25.36
1349	151.8	115.81	16.42							1365	181.33	54.27	24.25		1326	113.33	143.38	24.88
1349	151.46	116.03	16.59							1365	181.52	54.15	25.49		1326	113.47	144.17	25.02
1349	151.71	116.38	15.79							1365	181.79	54.37	25.37		1326	113.91	144.24	25.2
1349	149.3	116.68	18.3							1365	180.46	53.84	26.48		1326	114.32	144.87	22.79
1349	152.26	115.99	16.4							1365	180.9	53.71	25.1		1326	114.25	144.61	25.06
1349	150.37	118.46	16.6							1365	181.12	53.94	25.8		1326	113.77	144.46	24.72
1349	147.69	121.83	19.9							1365	180.59	53.79	24.33		1326	114.3	144.49	24.96
1349	143.97	122.29	21.96							1365	180.42	53.5	23.99		1326	113.34	144.23	26.74
1349	144.19	122.76	20.94							1365	180.72	53.32	23.84		1326	113.23	142.93	27.58
1349	141.14	121.59	21.87							1365	180.48	52.73	23.08		1326	115.58	144.77	25.78
1349	139.33	121.72	20.1							1365	180.32	53.08	26		1326	116.01	145.17	26.62
1349	136.44	119.42	19.81							1365	180.42	53.13	25.34		1326	117.89	145.5	26.84
1349	136.66	118.17	19.55							1365	180.59	52.62	25.71		1326	118.13	145.77	25.36
1349	136.36	117.87	18.24							1365	180.33	52.76	26.1		1326	118	144.85	26.68
1349	136.59	118.38	19.61							1365	180.46	52.95	26.52		1326	116.56	145.43	26.85
1349	136.11	118.56	18.03							1365	180.34	52.56	26.9		1326	117.28	144.41	25.37
1349	134.72	116.16	19.45							1365	180.59	53.67	27.12		1326	116.76	142.89	25.45
1349	132.63	115.08	18.5							1365	180.73	53.55	27.98		1326	117.07	141.92	27.16
1349	133.27	113.87	17.15							1365	180.36	53.48	28.31		1326	117.33	141.49	26.43
1349	132.91	113.29	17.45							1365	180.27	53.5	27.32		1326	117.29	141.92	25.19
1349	132.72	112.72	17.45							1365	180.72	53.44	28.37		1326	117.87	140.91	28.93
1349	132.41	113.17	17.49							1365	180.38	53.83	28.18		1326	117.63	141.34	28.43
1349	133.07	112.96	17.53							1365	180.35	53.77	27.91		1326	117.91	141.15	29.29
1349	133	113.18	16.8							1365	180.44	53.75	29.19		1326	119.42	141.54	29.11
1349	132.96	112.65	19.99							1365	181.12	54.17	27.68		1326	120.03	141.07	32.33
1349	131.72	112.67	17.6							1365	180.77	53.44	29.06		1326	120.29	140.73	32.15
1349	131.41	112.27	17.84							1365	181.01	53.52	29.08		1326	120.98	141.37	31.56
1349	132.35	111.07	20.15							1365	181.08	53.44	28.4		1326	121.01	142.26	33.72
1349	131.4	111.98	17.11							1365	180.9	52.99	27.63		1326	121.18	143.47	31.9
1349	130.15	113.18	19.95							1365	180.2	52.85	26.95		1326	121.46	146.83	34.1
1349	129.25	114.78	18.5							1365	180.58	53.09	25.83		1326	121.68	146.14	35.42
1349	126.27	115.22	17.1							1365	180.76	53.24	27.27		1326	121.68	146.84	36.05
1349	124.2	116.37	14.27							1365	180.78	53.36	26.96		1326	121.93	148.03	36.14
1349	119.96	117.27	15.33							1365	181.22	52.93	26.42		1326	121.52	148.94	36.22
1349	119.39	117.49	13.75							1365	181.08	53.23	27.39		1326	122.54	150.96	35.64
1349	118.73	121.21	14.82							1365	180.77	53.27	26.63		1326	122.22	149.81	35.34
1349	117.89	122.06	16.06							1365	180.64	53.12	26.3		1326	121.7	147.07	36.09
1349	117.98	121.4	13.85							1365	180.56	53.05	25.67		1326	121.93	146.2	34.5
1349	116.59	121.98	12.94							1365	180.94	53.05	25.64		1326	121.34	144.84	33.44
1349	115.01	122.46	13.11							1365	180.62	52.78	25.8		1326	121.85	144.78	31.97
1349	114.47	121.92	12.66							1365	180.79	52.98	25.08		1326	122.07	145.16	34.16
1349	114.84	120.31	11.57							1365	180.75	52.72	26.28		1326	121.83	144.22	31.96
1349	115.48	120.4	13.96							1365	181.04	52.93	26.41		1326	121.98	144.71	31.97
1349	115.49	120.14	11.98							1365	181.22	52.94	25.85		1326	122.64	145.49	31.42
1349	115.36	119.62	11.3							1365	181.02	52.94	26.99		1326	122.59	144.83	31.12
1349	115.39	119.39	12.44							1365	180.99	52.69	25.33		1326	122.03	144.14	30.1
1349	115.18	120.5	13.09							1365	180.89	53.02	24.73		1326	122.34	144.07	31.44
1349	114.88	120.3	12.9							1365	181.39	53.18	25.08		1326	122.16	143.95	30.66
1349	112.35	119.32	12.58							1365	181.46	53.74	25.88		1326	121.77	142.88	29.63
1349	111.48	118.94	13.14							1365	181.05	53.21	25.45		1326	121.57	141.8	29.55
1349	113.53	118.79	12.15							1365	181.64	53.97	24.26		1326	121.97	141.73	29.96
1349	113.06	119.93	14.28							1365	181.63	54.28	23.62		1326	122.23	140.64	29.54
1349	113.19	120.27	12.88							1365	181.9	54.02	22.82		1326	121.93	143.63	29.51
1349	111	120.72	12.57							1365	182.08	53.6	22.09		1326	121.84	145.68	26.77
1349	110.46	121.57	13.04							1365	181.5	53.77	21.03		1326	122.15	146.66	28.14
1349	110.09	121.07	14.08							1365	181.82	53.24	21.2		1326	122.49	148.08	26.21
1349	108.71	120.96	14.69							1365	181.28	52.92	23.46		1326	123.11	148.18	27.25
1349	108.35	119.85	16.75							1365	181.09	52.45	22.13		1326	123.47	150.02	25.81
1349	107.68	121.23	19.16							1365	181.23	51.49	22.03		1326	124.16	151.11	27.25
1349	106.88	121.44	19							1365	180.65	51.82	22.41		1326	125.02	154.5	25.56
1349	107.21	121.43	21.52							1365	180.84	52.1	22.37		1326	125.82	155.08	25.24
1349	105.8	121.34	22.73							1365	180.72	52.29	21.69		1326	128.05	158.7	28.53
1349	105.88	122.19	22.02							1365	181.35	52.67	22.46		1326	126.62	157.11	24.67
1349	105.92	121.53	21.43							1365	181.12	52.69	22.71		1326	128.51	158.77	29.49
1349	106.06	121.8	25.32							1365	180.7	52.76	24.68		1326	128.12	158.11	29.07
1349	106.54	123.42	26.02							1365	181.27	53.11	25.31		1326	128.05	158.22	27.47
1349	106.16	121.76	24.73							1365	181.32	53.25	25.51		1326	131.4	160.27	29.57
1349	106.98	123.22	26.15							1365	182.16	53.3	22.43		1326	131.63	162.62	30.21
1349	104.27	122.49	23.78							1365	181.84	53.88	24.76		1331	28.7	177.93	29.92
1349	105.9	121.98	26.53							1365	182.41	55.49	22.66		1331	31.03	179.04	34.32
1349	105.27	122.86	24.94							1365	181.29	53.9	23.18		1331	29.73	178.28	32.66
1349	105.73	122.43	26.52							1365	181.26	53.53	23.63		1331	30.38	178.5	35.21
1349	104.97	123.01	24.83							1365	181.56	53.51	23.18		1352	118.85	195.09	17.06
1349	105.92	122.69	25.87							1365	179.71	55.64	25.18		1352	118.93	194.74	17.56
1349	104.67	122.7	20.23							1365	180.76	52.49	22.07		1352	118.13	195.86	17.92
1349	103.65	122.66	27.14							1365	179.27	55.32	22.77		1352	115.46	195.75	16.19
1353	149.33	237.91	25.99							1365	179.16	55.32	22.5		1352	117.55	196.44	17.7
1353	147.73	236.98	27.36							1365	179.23	55.03	22.37		1352	118	196.16	17.59
1353	147.89	237.66	25.19							1365	178.84	54.83	22.69		1352	119.08	195.51	18.82
1356	247.68	69.14	12.98							1365	178.79	55.45	24.5		1352	118.88	195.61	19.03
1356	250.09	65.03	19.3							1365	180.19	51.44	22.89		1352	117.83	196.97	20.19
1359	2.98	20.67	10.38							1365	179.3	54.57	23.63		1352	118.7	198.33	20.56
1359	4.16	17.28	11.48							1365	180.18	51.34	22.3		1352	118.78	197.72	20.22
1363	226.01	98.96	25.31							1365	179.28	53.94	23.65		1352	117.65	196.91	19.93
1363	228.95	101.35	20.95							1365	180.13	50.96	22.59		1352	118.56	199.46	22.28
1363	231.14	95.8	18.93							1365	178.85	54.64	24.64		1352	118.38	197.35	21.67
1366	68.25	190.98	15.67							1365	180.07	51.55	21.41		1352	118.14	199.33	23.05
1366	70.3	192.14	13.88							1365	179.12	54.5	24.52		1352	117.85	198.41	22.01
1370	185.91	93.21	17.14							1365	178.77	54.45	24.37		1352	118.9	198.76	23.42
1370	184.98	89.55	18.78							1365	180.48	51.76	22.26		1352	117.21	200.09	23.19
1370	182.86	88.92	26.15							1365	180.22	51.72	21.14		1352	118.29	200.34	24.73
1373	205.33	74.54	19.82							1365	179.01	54.56	24.85		1352	118.39	201.18	27.39
1373	208.35	78.35	15.67							1365	179.43	54.68	24.15		1375	226.43	64.18	33.28
1376	203.6	79.59	12.94							1365	180.02	51.75	22.48		1375	227.17	64.07	34.13
1376	200.6	75.88	13.03							1365	179.35	55.15	24.95		1375	226.47	64.19	31.32
1379	250.19	251.81	34.26							1365	179.38	54.28	24.98		1375	226.07	64.83	33.03
1379	249.53	251.1	33.83							1365	178.81	54.8	26.27		1375	227.52	64.06	33.48
1382	247.38	35.25	22.83							1365	179.31	54.73	25.58		1375	226.71	64.38	33.69
1382	243.27	34.56	24.67							1365	179.47	54.02	25.5		1375	226.62	64.56	31.85
1392	80.05	198.07	35.99							1365	179.52	54.25	24.52		1375	227.06	65.14	33.49
1392	80.9	196.5	37.89							1365	179.64	54.19	24.84		1375	227.09	64.45	33.32
1392	82.69	195.06	39.03							1365	179.45	54.9	25.53		1375	226.84	64.07	32.94
1392	87.16	197.82	38.23							1365	180.6	51.54	23.25		1375	226.59	64.06	32.37
1392	87.65	197.8	35.07							1365	180.81	51.43	21.52		1375	226.5	64.9	32.67
1392	88.17	196.55	37.21							1365	180.27	51.64	20.59		1375	227.29	64.38	32.32
1392	93.44	193.22	39.77							1365	180.27	51.47	22.98		1375	226.53	64.16	32.14
1392	94.61	193.81	34.84							1365	180.48	51.75	21.67		1375	225.8	65.03	31.83
1392	97.9	198.96	38.78							1365	180.8	51.2	21.1		1375	225.45	65.3	32.14
1401	140.6	81.26	6.52							1365	180.84	51.74	22.28		1375	226.8	65.07	32.29
1401	140.62	81.5	7.61							1365	180.82	51.57	21.8		1375	226.19	65.77	32.87
1401	140.6	81.92	6.95							1365	180.68	51.5	20.58		1375	226.31	64.38	33.18
1401	141.56	82.74	10.14							1365	180.9	51.87	20.71		1375	226.65	65.56	31.7
1401	140.32	81.06	5.99							1365	179.64	51.57	13.74		1375	226.67	65.62	32.34
1401	141.05	81.8	6.39							1376	121.87	254.37	10.32		1375	226.49	65.3	33.27
1401	141.12	81.73	8.15							1376	122.69	255.63	13.27		1382	214.21	100.35	10.06
1401	140.66	80.11	11.97							1376	123.42	255.49	14.17		1382	214.96	101.65	10.32
1410	2.16	121.54	8.22							1376	124.66	256.42	15.07		1382	213.96	102.57	9.46
1410	2	120.43	5.11							1376	126.23	256.95	15.28		1382	214.1	101.62	11.49
1410	2.63	121.7	7.8							1376	127.89	256.51	16.63		1382	214.06	101.34	10.91
1410	2.24	120.63	6.71							1376	129.4	253.93	15.25		1382	217.23	99.88	9.47
1410	2.52	120.33	6.86							1376	131.13	250.19	13.57		1385	1.48	108.83	12.89
1410	2.42	120.94	5.04							1376	133.59	248.1	11.61		1385	1.84	107.35	16.85
1410	2.05	120.45	6.81							1376	132.49	246.45	6.32		1388	151.7	205.43	10.82
1410	1.99	120.25	5.83							1383	178.05	6.96	26.52		1388	153.63	205.97	11.52
1417	188.64	191.22	15.89							1383	184.63	5.39	28.35		1391	51.73	217.8	4.69
1417	189.87	192.31	17.6							1383	187.11	6.69	31.34		1391	53.12	217.35	6.43
1417	189.49	190.58	11.15							1383	192.93	12.02	31.18		1394	207.06	42.24	19.94
1417	189.99	190.81	9.31							1383	192.34	14.61	32.25		1394	206.71	42.96	12.34
1417	193.09	190.04	13.84							1383	192.51	17.44	30.41		1398	222.15	97.81	9.56
1417	194.01	192.3	13.72							1390	36.3	78.71	32.81		1398	224.46	99.94	12.15
1422	108.82	57.15	19.04							1390	36.81	79.15	32.5		1398	223.94	100.21	12.47
1422	105.14	56.19	19.21							1390	36.64	81.02	29.86		1401	140.83	175.53	24.35
1422	105.48	56.21	20.84							1390	36.96	79.69	29.61		1401	142.99	176.47	28.43
1422	102.98	55.79	21.18							1390	36.31	79.26	29.24		1407	137.53	93.46	6.79
1426	232.8	60.06	13.89							1390	34.69	80.64	25.58		1407	137.44	94.15	5
1426	237.36	60.81	19.26							1408	118.4	176.34	34.76		1407	134.33	95.27	6.42
1426	240.43	54.25	19.03							1408	118.63	174.84	37.24		1407	135.27	95.57	4.95
1429	1.07	102.38	29.2							1408	117.67	176.55	35.89		1407	136.97	95.97	5.22
1429	0.922	101.62	21.82							1408	116.99	176.94	35.86		1427	252.18	78.95	6.71
1433	211.24	88.24	24.2							1408	116.58	175.5	37.45		1427	252.3	81.75	6.84
1433	209.92	93.74	25.2							1408	118.03	176.88	34.14		1427	252.01	81.42	6.62
1433	217.6	93.05	27.18							1408	115.93	176.43	35.27		1427	252.23	83.25	5.98
1436	235.48	72.06	13.88							1408	114.7	176.71	32.55		1427	251.96	80.46	6.77
1436	240.12	73.79	17.38							1408	111.68	175.99	34.42		1427	251.78	80.44	6.57
1439	217.82	94.85	16.23							1408	114.5	176.78	31.8		1427	251.68	82.34	7.29
1439	214.62	91.88	18.29							1408	111.18	176.35	32.99		1427	251.53	81.59	6.84
1449	249.59	3.03	25.52							1408	110.76	178.54	34.2		1427	251.69	82.1	7.03
1449	247.29	3.66	26.88							1408	111.58	177.63	30.35		1427	251.22	81.77	7.37
1449	246.15	2.63	29.12							1408	108.91	178.55	31.37		1427	251.62	81.21	6.66
1449	244.01	4.31	26.53							1408	107.04	180.01	32.85		1427	251.74	81.37	6.52
1449	240.53	5.61	27.19							1408	105.21	182.1	35.18		1427	251.82	81.28	6.78
1449	238.59	6	25.27							1408	101.65	187.78	34.45		1427	252.09	81.63	6.82
1449	237.01	6.39	24.99							1411	20.44	261.87	2.38		1427	251.87	82.33	8.15
1449	234.35	8.98	22.77							1411	19.27	262.8	2.38		1427	251.94	82.12	6.84
1449	232.77	9.58	24.71							1416	3.92	2.47	13.8		1427	251.77	82.22	6.39
1452	236.84	40.17	24.21							1416	2.6	3.92	12.03		1427	252.26	82.87	6.69
1452	233.94	35.44	29.1							1416	2.4	3.66	11.25		1427	252.29	82.62	6.99
1457	7.89	74.52	25.35							1416	2.44	2.86	10.86		1433	229.13	140.22	29.74
1457	5.65	74.08	29.15							1532	121.02	114.17	25.44		1433	231.14	139.65	31.26
1457	3.2	72.73	32.25							1532	120.9	114.62	27.48		1433	227.11	141.65	27.56
1457	2.25	72.4	35.04							1532	120.44	114.99	28.76		1433	225.54	142.14	29.04
1460	193.55	81.75	12.04							1532	120.03	114.72	28.74		1433	225.9	141.37	30.07
1460	195.8	75	14.77							1532	120.77	114.64	28.22		1436	96.62	237.9	4.83
1463	163.05	112.08	6.62							1532	120.86	114.52	28.66		1436	95.16	238.65	4.17
1463	157.29	111.94	8.03							1532	121.04	114.74	29.81		1575	47.73	251.27	8.77
1472	250.7	90.15	26.13							1532	121.08	114.77	28.19		1575	48.47	250.9	6.42
1472	251.39	89.29	20.73							1532	121.07	114.44	29.86		1575	48.53	250.77	8.53
1472	251.13	88.57	24.97							1532	120.76	114.21	27.47		1575	48.74	250.7	7.8
1472	251.73	89.45	23.88							1532	120.48	114	26.94		1575	49.14	250.28	7.22
1472	251.19	89.21	20.94							1532	120.75	113.91	26.62		1575	49.07	250.4	8.01
1472	251.34	89.08	24.8							1532	120.91	113.61	28.04		1575	48.98	248.6	8.4
1472	251.46	88.92	23.85							1532	120.96	113.24	28.35		1575	48.91	248.45	6.75
1472	251.09	88.19	28.8							1532	121.45	113.79	27.9		1575	48.39	248.44	8.45
1476	198.24	92.33	15.74							1532	121.33	113.12	29.35		1575	49.5	247.19	11.68
1476	204.27	87.82	15.09							1532	120.98	112.22	28.38		1575	48.97	248.11	7.32
1476	199.4	85.8	15.77							1532	123.82	106.46	27.13		1575	49.43	248.24	7.53
1479	240.01	63.37	31.88							1532	127.69	100.73	25.81		1575	49.61	248.97	5.56
1479	240.94	64.96	26.42							1532	124.27	106.7	27.29		1575	49.24	246.89	5.08
1497	251.23	252.68	31.34							1532	130.04	104.89	24.9		1575	49.51	248.11	6.2
1497	251.25	252.38	30.11							1532	131.61	106.27	22.93		1575	49.17	247.34	6.27
1497	251.16	252.41	33.17							1532	132.96	105.26	23.32		1575	49.64	247.45	5.95
1497	251.53	252.26	31.99							1532	133.05	106.36	22.34		1575	46.29	247.05	8.53
1497	250.85	252.04	34.61							1532	135.13	104.03	22.9		1575	46.85	246.8	8.84
1497	251.55	252.34	33.93							1532	135.2	104.45	23.48		1575	46.89	246.72	6.37
1497	251.68	252.13	32.74							1532	135.94	104.14	23.9		1575	44.91	246.17	6.13
1497	250.81	251.95	33.02							1532	137.33	104.96	23.05		1575	44.25	245.67	7.31
1497	250.62	252.21	34.56							1532	136.53	104.06	24.67		1575	42.77	244.98	5.26
1497	250.17	251.8	33.01							1532	137.42	105.25	23.24		1575	42.88	244.61	5.97
1497	249.41	251.38	34.3							1532	137.3	104.59	24.3		1575	40.52	244.21	5.55
1497	249.13	251.04	34.68							1532	137.11	104.3	20.99		1575	41.36	244.44	5.36
1497	248.47	249.92	34.7							1532	137.1	103.95	21.11		1575	41.4	243.88	5.11
1497	248.82	250.98	35.33							1532	136.92	103.7	20.86		1575	41.53	244.47	5.06
1497	250.09	251.94	34.84							1532	136.66	102.89	21.44		1575	41.76	244.27	6.39
1497	249.6	250.34	35.43							1532	136.81	103.44	21.92		1575	42.44	244.73	5.08
1497	249.77	251.35	33.19							1532	136.91	103.43	20.72		1575	43.28	244.97	5.23
1523	27.61	54.55	30.67							1532	136.69	104.02	21.48		1575	43.53	245.67	6.3
1523	30.07	53.75	28.35							1532	136.56	103.17	21.82		1575	44.29	245.26	5.69
1523	29.51	52.93	23.74							1532	136.05	102.23	21.04		1575	42.84	245.23	4.52
1523	30.81	52.16	23.72							1532	136.36	102.58	21.6		1575	42.72	245.37	6.47
1523	31.9	51.13	21.06							1532	136.18	102.08	21.43		1575	41.8	244.97	7.95
1523	33.74	50.97	19.4							1532	136.52	103.37	21.54		1575	42.88	245.44	6.28
1523	33.83	51.45	20.76							1532	135.9	102.96	20.97		1575	42.46	244.88	4.48
1523	33.54	51.25	16.87							1532	135.9	103.39	21.3		1575	43.12	244.9	6.22
1523	34.28	50.98	15.43							1532	136.22	103.52	21.94		1575	43.55	244.55	4.53
1523	33.87	50.72	16.96							1532	136.04	103.34	20.61		1575	43.6	244.58	5.03
1523	33.29	50.43	18.98							1532	135.85	103.39	21.11		1575	43.6	245.39	8.33
1523	34.88	49.37	14.55							1532	135.74	103.6	20.42		1575	44.53	245.57	5.41
1523	32.9	50.22	18.19							1532	135.67	103.67	20.52		1575	45.4	246.01	5.01
1523	32.6	51.98	19.23							1532	135.89	103.51	20.53		1575	46.58	246.34	4.29
1523	30.36	51.76	21.67							1532	135.89	103.41	21.66		1575	44.84	245.71	6.89
1523	33.48	51.62	18.05							1532	136.17	104.12	19.68		1575	43.34	244.44	6.22
1523	36.62	51.42	16.37							1532	136.95	104.08	18.46		1575	41.56	244.66	5.09
1523	34.82	52.1	19.12							1532	136.58	104.62	19.14		1575	41.49	244.5	6.16
1523	37.53	51.5	17.74							1532	137.6	104.86	17.48		1575	41.47	244.7	6.84
1523	38.74	50.78	18.43							1532	137.49	105.72	16.98		1575	41.56	244.8	7.02
1523	34.9	51.85	19.44							1532	137.52	105.86	15.08		1575	41.5	244.87	5.87
1523	37.47	51.23	16							1532	137.73	106.15	16.42		1575	42.54	244.93	5.66
1523	35.64	52.02	20							1532	138.63	106.29	16.73		1575	41.59	245.5	5.89
1523	34.54	52.75	18.11							1532	138.5	105.1	16.93		1575	43.51	245.93	4.99
1523	37.01	51.44	20.45							1532	138.56	106.55	16.18		1575	43.89	245.95	5.65
1526	250.7	56.36	15.47							1532	138.74	105.9	17.15		1575	43.69	245.63	5.83
1526	248.65	59.05	17.55							1532	138.75	106.04	16.33		1575	45.25	246.84	7.31
1536	30.03	228.7	22.97							1532	138.21	106.01	14.73		1575	45.07	246.67	6.45
1536	33.29	228.65	17.64							1532	137.84	105.44	17.32		1575	43.66	246.12	6.51
1536	33.28	226.33	18.17							1532	137.89	106.61	17.34		1575	44.72	246.76	5.7
1536	34.57	225.24	17.53							1532	138.03	106.65	20.48		1575	46.48	246.83	4.52
1536	36.27	224.54	19.57							1532	138.04	106.08	19.94		1575	44.46	246.47	4.51
1536	37.61	223.11	21.29							1532	137.57	107.41	17.67		1575	44.34	246.39	5.6
1536	37.49	222.89	23.08							1532	137.4	107.88	17.16		1575	43.94	245.97	5.04
1536	37.45	222.77	22.58							1532	137.29	107.95	17.41		1575	43.75	245.68	6.39
1536	37.33	222.76	21.55							1532	137.5	107.42	15.62		1575	43.9	245.63	5.26
1539	247.73	72.95	18.35							1532	137.99	106.64	16.8		1575	43.1	245.15	5.43
1539	243.76	69.52	19.74							1532	137.71	107	17.21		1575	43.56	246.4	6.24
1543	148.72	240.17	28.49							1532	137.38	107.77	16.77		1575	44.25	245.65	5.35
1543	148.63	238.92	28.74							1532	138.04	107.71	17.6		1575	43.19	244.54	5.65
1543	148.42	239.28	27.16							1532	138.29	107.96	15.03		1575	43.78	247.38	5.59
1547	186.54	101.1	17.13							1532	137.29	107.71	13.41		1575	44.3	245.35	4.79
1547	186.86	102.54	22.79							1532	137.55	107.91	14.74		1575	43.71	248.04	6.99
1547	187.69	103.2	21.73							1532	137.85	107.63	15.11		1575	44.12	248.15	6.32
1551	79.15	11.56	36.03							1532	137.16	106.74	14.46		1575	43.9	248.17	5.32
1551	78.23	10.03	36.36							1532	137.7	107.16	16.23		1575	43.09	246.96	5.97
1551	76.79	8.91	35.74							1532	137.64	108.01	15.86		1575	43.3	246.29	6.63
1555	214.97	85.05	13.22							1532	137.47	108.81	14.72		1575	44.71	245.95	6.33
1555	211.95	81.39	13.31							1532	137.46	107.75	15.77		1575	43.23	245.77	6.65
1555	212.1	83.26	17.56							1532	137.12	108.09	15.86		1575	44.52	245.24	6.37
1596	2.35	74.17	19.54							1532	138.03	108.11	15.79		1575	44.02	244.37	6.67
1596	1.92	73.22	18.25							1532	138.68	107.79	15.62		1575	43.19	243.33	6.9
1596	2.31	72.82	14.13							1532	138.27	107.42	14.74		1575	42.4	243.69	6.09
1596	2.5	73.19	17.41							1532	138.43	108.14	15.44		1575	42.08	243.67	7.13
1596	2.68	73.69	16.82							1532	137.74	108.22	13.89		1575	40.62	242.29	6.02
1596	3.12	75.38	15.23							1532	138.36	108.52	15.71		1575	40.38	242.53	6.71
1596	2.47	74.85	15.19							1532	137.92	108.22	16.16		1575	40.35	242.9	6.04
1596	3.25	74.83	16.02							1532	138.01	107.12	15.92		1575	40.7	243.16	7.14
1596	2.5	74.91	12.87							1532	138.06	107.9	15.1		1575	40.12	242.45	6.23
1596	3.34	75.24	14.46							1532	137.13	108.2	16.15		1575	42.16	245.61	5.57
1596	2.65	75.7	12.19							1532	137.43	108.4	15.67		1575	42.84	245.6	6.39
1596	3.16	76.72	12.03							1532	137.46	108.81	15.53		1575	44.44	245.83	6.46
1596	2.97	77.68	11.29							1532	138.12	107.83	17.14		1575	44.8	245.87	5.43
1596	4.14	79.45	9.24							1532	137.85	107.61	16.67		1575	45.92	246.64	6.14
1596	4.54	80.16	8.04							1532	137.47	107.6	15.16		1575	45.22	246.14	5.33
1596	5.37	80.17	9.13							1532	137.16	108.52	15.85		1575	44.7	245.6	7.09
1596	6.64	82.26	8.12							1532	136.4	109.93	15.77		1575	45.03	244.72	5.89
1596	7.37	83.04	7.52							1532	136.94	108.47	15.7		1575	45.83	246.16	5.66
1596	8.21	83.13	10.71							1532	137.87	107.4	15.68		1575	46	246.34	6.41
1596	9.62	86.88	8.51							1532	138.1	107	14.55		1575	46.77	246.38	5.27
1596	9.45	89.61	7.95							1532	137.14	108.48	15.52		1575	46.4	246.05	5.08
1596	8.93	92.2	9.9							1532	137.66	107.42	14.96		1575	47.53	246.44	4.88
1596	9.32	92.82	10.52							1532	137.86	106.86	15.79		1575	47.23	245.5	5.29
1596	9.17	94.09	8.18							1532	137.34	108.12	15.34		1575	49.49	248.67	4.82
1596	8.23	94.26	11.05							1532	137.12	109.45	14.73		1575	47.27	246.98	5.34
1596	7.51	94.89	10.19							1532	136.57	108.74	15.71		1575	49.62	248.57	4.74
1596	8.59	93.62	9.71							1532	136.47	108.73	15.4		1575	50.42	249.37	5.4
1596	6.83	94.08	12.28							1532	137.01	109.71	15.32		1575	50.4	249.44	5.41
1596	6.73	94.45	14.21							1569	254.35	230.81	13.23		1575	50.51	249.47	7.47
1596	5.94	95.31	13.75							1569	251.72	231.09	12.88		1575	50.25	249.68	5.75
1596	6.18	95.69	13.06							1569	254.07	231.22	11.86		1575	50.01	250.11	5.58
1596	5.75	96.2	14.18							1569	252.9	232.63	13.55		1575	49.95	250.92	6.6
1596	7.5	93.86	8.82							1569	253.54	232.53	11.93		1575	50.2	250.81	6.78
1596	6.04	95.5	12.46							1569	252.86	228.51	11.54		1575	50.1	250.75	6.47
1596	5.79	95.86	11.17							1569	250.59	228.61	12.43		1575	49.74	250.68	6.78
1596	4.73	96.21	12.11							1569	250.49	227.85	12		1575	50.24	251.14	5.3
1596	6.18	93.54	10.57							1569	249.02	225.81	12.18		1575	49.35	251.14	6.59
1596	4.96	95.41	13.76							1569	248.95	220	13.33		1575	49.33	251.27	5.61
1596	6.04	94.7	12.73							1569	249.33	216.95	11.72		1575	49.64	251.56	5.8
1596	9.07	91.11	11.12							1569	250.56	214.07	12.66		1575	49.35	251.56	5.22
1602	3.46	17.62	9.55							1569	251.7	212.16	11.56		1575	49.14	251.74	5.39
1602	2.32	19.5	7.77							1569	253.07	209.83	13.33		1575	49.47	251.71	6.03
1602	3.73	18.39	13.44							1569	253.54	210.11	13.14		1575	49.87	251.13	6.17
1602	4.54	20.35	10.88							1569	255.46	208.31	12.12		1575	50.03	251.59	4.86
1602	2.21	19.39	10.08							1569	253.86	208.94	14.22		1575	50.07	251.68	5.77
1607	198.71	85.65	21.53							1569	260.68	205.93	14.35		1575	49.9	251.52	5.59
1607	197.44	84.5	15.26							1569	261.17	205.85	14.44		1575	50.44	251.6	4.62
1607	202.2	86.63	15.3							1569	254.9	208.22	13.57		1575	49.91	251.31	4.52
1607	200.92	80.11	16.47							1569	260.3	206.67	15.21		1575	49.83	251.56	5.9
1612	236.25	74.12	15.67							1569	259.67	206.72	14.72		1575	51.1	251.74	4.69
1612	240.42	77.5	11.05							1569	263.78	205.41	15.19		1575	49.76	251.43	8.2
1612	242.77	84.81	9.93							1569	262.75	207.01	15.22		1575	50	251.24	6.86
1612	236.4	87.82	10.39							1569	263.51	206.3	15.08		1575	50.25	251.23	5.19
1622	78.18	212.69	12.87							1569	264.6	206.53	15.46		1575	51.31	251.61	3.66
1622	81.66	214.95	10.16							1569	263.94	206.28	16.01		1575	50.45	251.78	4.34
1622	83.37	212.83	9.88							1569	265.87	205.57	14.38		1575	50.88	252.04	4.72
1622	80.62	216.2	13.56							1569	264.12	207.03	14.55		1575	51.38	252.44	5.04
1622	80.44	211.44	9.3							1569	264.51	206.94	15.46		1579	167.29	238.84	12.56
1622	82.37	212.39	10.97							1569	263.92	206.56	13.43		1579	167.16	237.78	14.77
1622	82.39	214	9.4							1569	263.91	206.78	13.57		1579	165.54	236.43	11.99
1622	83.92	214.97	13.74							1569	263.93	205.75	15.95		1582	139.43	175.39	28.77
1622	84.71	215.18	12.56							1569	263.2	207.24	13.52		1582	140.84	176.36	32.66
1625	164.34	128.07	30.67							1569	262.81	206.88	13.75		1587	102.44	160.07	2.03
1625	163.89	128.45	31.55							1569	264.31	206.16	14.47		1587	103.24	159.44	2.47
1628	236.56	68.29	18.29							1572	180.47	252.83	12.5		1587	101.81	158.23	3.54
1628	230.53	65.27	15.71							1572	183.21	255.86	11.84		1587	102.89	159.24	3.23
1652	11.62	57.47	6.82							1578	161.55	7.69	20.09		1590	80.38	1.82	23.46
1652	11.56	58.09	7.28							1578	162.82	5.21	20.31		1590	81.43	3.08	22.21
1652	9.91	59.03	9.41							1578	164.22	3.62	21.39		1593	160.99	132.86	3.83
1652	10.03	58.41	7.41							1578	165.09	4.8	20.74		1593	161.12	131.72	5.94
1652	9.3	58.15	5.54							1578	166.44	7.42	21.07		1599	44.66	204.29	3.9
1652	8.52	58.49	9.46							1612	121.4	144.44	21.91		1599	45.08	204.01	3.58
1652	8.17	58.23	7.56							1612	121.26	143.8	23.65		1599	45.08	202.98	3.1
1652	7.44	59.01	7.38							1612	121.46	144.08	23.49		1599	44.95	202.75	3.6
1652	7.43	59.66	8.26							1612	123.1	143.64	22.05		1599	44.86	202.74	3.75
1652	6.12	60.45	7.93							1612	124.27	144.65	23.17		1608	222.63	99.52	14.09
1652	5.6	61.62	6.22							1612	126.96	145.18	23.78		1608	223.18	98.12	10.74
1652	5.71	62.89	6.46							1612	128.17	145	24.92		1608	223.98	97.98	13.53
1652	5.69	64.43	9.24							1612	129.3	146.01	23.85		1608	220.02	98.83	11.57
1652	6.56	67.14	8.47							1612	130.53	145.43	23.76		1608	221.96	98.18	13.03
1652	5.54	70.38	13.65							1612	131.66	145.24	22.59		1608	217.01	100.34	10.8
1652	5.15	72.2	12.15							1612	133.31	144.71	24.57		1608	219.45	98.9	8.75
1652	5.59	72.41	9.69							1612	133.49	145.35	21.76		1608	222.73	99.04	12.28
1652	8.17	74.57	11							1612	134.99	146.21	20.39		1613	131.3	170.8	28.28
1652	10.02	78.93	7.91							1612	135.24	147.8	20.67		1613	133.6	173.5	28.29
1652	13.13	80.01	12.78							1612	134.53	148.99	23.6		1613	134.85	173.44	26.89
1652	13.7	80.25	15.16							1612	135.44	152.82	18.88		1613	132.49	171.17	24.58
1652	13.88	81.43	14.37							1612	135.73	155	20.11		1618	95.68	239.26	4.34
1652	13.23	81.75	14.85							1612	137.05	157.11	19.88		1618	95.42	238.96	4.81
1659	19.16	224.71	34.11							1612	137.3	159.23	19.63		1618	96.28	239.01	2.93
1659	16.56	226.24	34.15							1612	137.81	161.63	20.31		1618	96.43	238.14	2.55
1659	14.16	226.85	34.67							1612	138.35	163.17	19.7		1621	141.33	160.57	4.35
1659	14.77	226.5	33.84							1612	137.76	168.09	18.29		1621	140.89	160.34	3.03
1659	14.27	225.93	34.44							1612	136.38	168.97	17.84		1628	30.26	179.26	31.46
1659	10.96	227.96	34.03							1612	134.42	171.15	14.72		1628	28.81	178.25	28.7
1662	241.23	58.57	17.96							1612	134.44	172.54	13.89		1628	29.26	179.66	31.22
1662	246.29	58.55	11.84							1612	136.23	172.44	12.33		1628	29.14	178.25	31.61
1666	224.11	96.58	7.82							1612	135.94	173.39	14.26		1628	29.37	178.45	26.44
1666	223.88	100.3	6.07							1612	136.36	173.88	13.79		1628	28.89	177.61	31.48
1666	225.72	105.72	8.15							1612	137.1	173	13.54		1632	53.99	101.4	9.97
1669	250.98	61.32	22.8							1612	137.94	172.96	15.6		1632	53.82	102.39	9.18
1669	246.26	64.11	18.26							1612	139.05	171.69	15.62		1632	54.21	100.89	11.73
1672	166.51	115.02	7.41							1612	139.7	172.4	15.88		1638	160.75	241.22	10.06
1672	164.25	113.69	4.89							1612	138.97	171.76	18.88		1638	163.5	238.78	10.85
1675	57.17	234.85	24.41							1625	125.65	1.67	22.19		1638	161.47	240.79	11.1
1675	55.41	236.38	20.48							1625	125.51	1.56	25.33		1638	161.77	238.35	13.01
1678	236.38	36.58	10.14							1625	126.27	2.33	23.9		1638	163.7	237.09	13.15
1678	235.86	39.1	17.15							1625	126.03	1.7	21.81		1649	227.33	140.15	32.11
1683	24	238.76	11.84							1625	126.73	2.16	22.55		1649	227.42	142.15	30
1683	24.37	238.87	12.75							1625	126.17	2.25	24.33		1649	227.84	141.96	29.28
1683	24.41	238.71	12.04							1625	126.22	2.17	23.75		1649	227.48	141.47	30.74
1683	24.56	238.01	13.2							1625	125.87	2	23.26		1649	227	143.66	28.92
1687	188.9	100.97	15.12							1625	125.34	1.72	24.2		1649	227.51	142.57	25.51
1687	186.37	102.98	20.95							1625	124.97	1.95	24.12		1649	228.92	142.54	25.78
1687	185.39	102.99	26.23							1625	124.28	1.79	21.65		1649	228.21	143.03	25.97
1690	244.54	65.51	24.34							1625	123.91	1.59	21.67		1649	228.92	141.74	28.41
1690	244.97	61.74	18.79							1647	308.28	176.89	26.04		1649	226.91	142.22	28.12
1693	198.47	93.16	9.75							1647	307.61	176.6	19.29		1656	51.8	136.5	4.14
1693	195.85	96.83	13.54							1647	309.4	176.76	24.38		1656	52.61	136.32	3.16
1696	205.92	75.06	11.93							1647	310.27	176.27	18.83		1656	51.34	135.11	4.8
1696	202.8	73.98	8.32							1647	310.38	175.7	18.89		1656	51.46	134.53	1.63
1699	180.52	83.87	21.11							1647	310.25	175.7	20.02		1656	52.43	132.86	3.9
1699	183.47	79.48	17.2							1647	310.77	174.8	19.26		1656	51.4	133.84	3.16
1703	1.04	124.94	9.1							1647	310.32	174.37	19.33		1659	164.18	130.84	1.88
1703	1.06	126.62	8.35							1647	309.71	174.67	18.91		1659	162.66	132.55	1.99
1703	1.65	123.33	7.79							1647	308.66	173.19	18.76		1666	54.95	153.81	4.06
1707	16.6	73.32	36.04							1647	308.1	172.71	19.03		1666	54.89	153.97	6.47
1707	16.92	73.24	33.88							1647	307.8	172.55	19.02		1666	55.12	153.69	5.93
1707	16.89	73.35	32.46							1647	307.5	171.76	16.17		1666	54.31	153.24	4.41
1713	78.11	198.32	31.58							1647	306.54	172.48	17.91		1666	53.96	154.24	5.05
1713	77.3	202.09	32.54							1647	305.77	171.96	18.53		1666	53.18	154.24	4.07
1713	76.06	200.26	31.79							1647	304.43	171.11	17.83		1674	16.3	247.35	2.86
1713	76.29	198.04	34.3							1647	303.46	171.27	17.02		1674	16.46	248.38	4.33
1713	77.32	201.85	31.96							1647	303.45	172.23	18.68		1674	16.19	245.76	6.96
1716	188.08	89.52	15.28							1647	304.74	171.96	17.75		1674	16.23	249.06	6.67
1716	185.34	91.75	12.77							1647	304.63	172.01	18.3		1674	16.67	249.79	5.71
1727	15.54	127.52	12.9							1647	304.2	172.72	19.24		1674	18.3	250.26	5.16
1727	15.62	126.96	13.85							1650	107.73	48.9	45.38		1674	17.38	248.66	3.38
1727	17.52	123.06	13.22							1650	107.73	48.9	46.3		1677	213.67	104.03	16.05
1727	16.12	122.4	11.31							1659	114.31	240.74	8.66		1677	211.8	102.59	22.65
1727	16	122.32	13.91							1659	115.04	240.33	14.19		1696	123	157.87	38.61
1727	15.23	121.83	11.62							1659	113.9	240.38	14.83		1696	123.63	157.07	34.13
1727	15.72	122.89	12.45							1659	113.41	239.5	11.63		1696	124.71	159.53	34.09
1727	15.77	122.35	12.4							1659	113.19	240.31	14.68		1696	125.69	160.05	32.77
1727	15.53	122.25	12							1659	112.25	240.88	17.53		1696	124.87	159.17	32.94
1727	15.97	122.89	10.36							1659	113.21	240.07	13.48		1696	125.09	158.61	35.94
1732	51.81	37.55	29.28							1659	114.17	238.51	9.54		1696	125.61	158.99	32.3
1732	52.66	37.32	24.02							1668	150.98	272.53	12.83		1696	125.76	158.02	31.01
1732	53.35	38.32	21.15							1668	148.23	273.57	16.72		1696	126.26	159.79	31
1732	53.75	37.18	26.36							1668	145.83	272.25	18.57		1696	125.39	161.08	30.89
1735	235.49	60.41	11.38							1668	145.19	271.46	16.99		1696	125.27	159.4	33
1735	232.63	55.46	13.68							1668	144.31	271.39	18.54		1696	126.67	159.37	31.65
1738	60.84	77.9	10.1							1668	143.6	271.08	19.1		1696	126.43	161.32	32.1
1738	60.61	77.66	9.88							1668	143.76	272.29	18.93		1696	126.35	160.48	29.54
1741	141.23	80.82	5.41							1668	143.87	271.67	20.24		1696	126.66	161.93	33.12
1741	139.97	80.31	7.93							1674	151.96	211.65	22.82		1696	126.99	161.3	30.58
1747	180.4	205.83	6.04							1674	153.9	214.08	22.02		1696	127.71	163.93	28.35
1747	181.5	205.74	4.15							1674	155.07	215.05	20.1		1696	127.09	162.6	30.84
1747	181.54	203.27	5.29							1674	154.88	216.33	19.86		1719	85.59	29.84	15
1747	181.83	204.55	7.78							1674	155.68	217.81	20.73		1719	87.69	31.82	13.14
1747	182.99	200.56	3.73							1682	121.02	111.29	24.11		1719	86.88	29.63	11.34
1751	247.48	56.74	23.87							1682	120.92	110.67	24.81		1719	88.81	33.22	10.48
1751	247.94	53.44	17.29							1682	120.53	109.96	23.57		1719	87.77	31.83	13.67
1751	249.16	52.01	19.03							1682	120.86	111.06	25.29		1719	85.51	31.66	12.98
1755	114.3	205.92	35.1							1682	121.46	111.89	25.56		1719	84.55	32.79	14.76
1755	115.4	205.66	30.45							1682	120.48	110.71	24.62		1719	84.97	29.88	14.84
1755	115.35	205.11	32.1							1682	120.82	111	24.29		1719	83.5	34.32	13.96
1758	244.66	34.02	22.71							1726	286.78	161.52	20.85		1719	85.89	31.5	14.34
1758	244.76	36.84	27.33							1726	289.37	160.8	17.13		1719	83.26	31.39	10.46
1763	33.83	238.53	19.2							1726	287.62	161.61	18.95		1719	85.65	32.65	15.11
1763	33.3	237.87	18.13							1726	283.04	157.96	20.28		1719	86.29	31.56	14.78
1763	30.22	237.53	16.1							1726	284.84	159.5	19.48		1719	86.32	30.8	13.01
1763	31.85	234.53	17.05							1726	284.85	158.96	18.62		1719	86.52	32.51	15.49
1777	169.52	25.8	35.98							1726	283.34	160.55	17.84		1719	83.42	33.75	13.88
1777	169.85	26.07	36.48							1726	283.92	158.93	18.52		1719	87.24	29.34	13.31
1777	168.63	26.26	36.34							1726	285.56	159.17	17		1719	84.53	32.31	13.31
1777	167.84	26.42	35.51							1726	285.09	160.46	16.98		1719	84.58	32.87	14.09
1777	167.41	26.17	34.67							1726	282.52	157.71	16.84		1719	84.52	31.3	12.02
1777	167	28.42	31.56							1726	283.34	158.02	17.34		1719	85.19	33.2	12.45
1777	166.91	26.81	33.75							1726	284.08	158.14	16.93		1719	86.28	32.48	12.92
1777	165.88	27.98	33.23							1726	276.65	158.41	17.42		1723	45.08	206.87	3.17
1777	167.31	28.47	32.13							1726	273.05	158.04	17.06		1723	44.81	206.16	3.16
1777	162.2	30.21	29.25							1726	272.23	158.76	18.87		1723	44.81	205.35	3.47
1777	159.69	28.98	25.34							1726	271.21	158.05	18.71		1726	136.52	93.72	5.59
1777	156.87	30.75	25.23							1726	269.3	159.62	18.67		1726	137.79	94.76	5.16
1777	157.37	30.11	25.57							1726	266.42	159.53	18.38		1740	3.07	108.6	16.73
1781	203.2	192.08	15.75							1726	268.49	158.92	18.97		1740	2.86	110.19	13.1
1781	202.69	190.25	12.89							1726	266.63	159.27	19.22		1740	3.29	109.21	14.65
1781	202.35	190.87	17.47							1726	268.45	159.57	20.48		1740	3.19	110.27	12.88
1787	29.14	225.17	32.24							1726	268.36	159.56	19.65		1740	3.68	108.11	15.66
1787	26.67	223.3	35.01							1726	266.35	163.37	19.81		1740	3.75	107.51	16.18
1787	26.96	224.01	33.05							1726	263.82	167.47	20.4		1740	2.99	108.52	16.25
1787	24.75	224.76	35							1726	263.37	169.39	22.34		1740	2.65	109.22	14.29
1787	23.06	224.8	35.36							1726	263.57	168.49	20.02		1740	2.82	108.28	14.41
1790	186.11	106.42	23.99							1726	261.36	170.06	22.9		1740	3.26	106.66	15.12
1790	185.51	104.84	21.58							1726	258.63	170.55	22.51		1740	3.43	107.47	14.07
1793	2.94	124.53	10.59							1726	259.15	169.68	22.82		1740	2.57	104.85	18.87
1793	2.06	124.59	9.04							1726	258.33	168.83	22		1740	2.16	106.46	14.05
1805	241.34	87.7	26.16							1726	257.24	168.89	22.66		1745	203.36	105.17	34
1805	240.39	87.07	22.03							1726	256.14	168.65	21.64		1745	202	105.49	33.65
1805	242.12	88.58	22.24							1726	254.33	169.29	21.88		1745	204.01	104.96	32.23
1805	243.87	87.17	21.77							1726	253.97	169.97	20.44		1745	202.25	107.56	31.29
1805	242.87	87.91	19.79							1726	253.11	170.49	19.66		1749	80.32	1.78	23.39
1805	242.18	87.06	17.98							1726	252.37	170	18.61		1749	81.18	2.33	23.44
1805	242.58	87.75	20.65							1726	253.38	169.85	17.95		1749	82.51	2.56	24.95
1805	243.27	87.02	24.55							1726	254.25	170.36	17.61		1753	86.55	227.24	8.63
1805	243.84	87.46	23.85							1726	253.8	169.18	14.69		1753	87.8	224.91	11.09
1805	244.28	87.16	20.48							1726	253.49	169.97	18.62		1753	88.78	224.21	14.29
1805	244.54	88.14	16.79							1726	252.04	170.05	18.3		1756	26.71	178.71	27.01
1811	163.15	123.5	21.08							1726	251.7	168.98	17.36		1756	27.54	179.35	30.18
1811	166.86	123.17	21.26							1836	104.87	220.31	27.47		1766	137.97	95.18	4.72
1811	166.18	124.84	26.93							1836	105.3	220.18	27.13		1766	134.68	96.45	6.9
1811	167.12	124.3	23.9							1836	105.11	221.03	28.78		1766	136.35	95.04	6.75
1811	166.61	125.69	29.78							1836	105.08	221.33	28.09		1766	135.02	97.09	5.45
1815	241.34	57.3	18.32							1836	105.29	223.28	25.88		1766	135.52	95.23	6.48
1815	246.91	53.48	16.96							1836	102.85	223.76	21.74		1766	136.27	96.08	6.48
1815	251.14	56.34	15.4							1836	101.31	222.48	17.01		1766	135.81	95.31	5.49
1829	141.36	81.67	7.86							1836	99.44	222.1	16.79		1766	136.21	95.55	7.27
1829	141.73	81.46	7.84							1836	99.66	220.8	18.12		1766	136.64	94.37	4.26
1829	142.64	80.63	8.32							1836	98.79	218.3	17.65		1769	235.53	182.38	2
1829	141.16	81.31	7.13							1836	97.7	218.08	17.21		1769	236.68	180.73	2.3
1829	142.47	81.15	10.08							1836	97.64	217.94	17.78		1773	250.52	94.18	8.9
1829	141.43	82.8	8.08							1836	96.91	218.02	17.53		1773	249.76	94.8	8.37
1829	141.39	83.45	9.38							1836	96.37	218.38	18.65		1773	250.81	95.17	8.49
1829	140.29	82.61	10.38							1836	94.95	218.5	17.59		1776	216.08	102.18	10.45
1829	141.57	80.85	6.47							1836	96.19	218.58	17.12		1776	214.28	101.6	9.46
1829	141.14	79.72	8.97							1836	95.18	219.03	16.53		1782	68.18	92.6	9.53
1829	140.4	81.43	7.56							1836	95.25	220.25	17.42		1782	66.46	90.95	8.66
1829	141.57	81.05	6.4							1836	94.7	222.16	18.63		1782	59.8	91.27	11.07
1829	140.2	81.67	10.71							1836	92.39	223.07	20.04		1782	63.22	90.28	8.13
1931	59.05	119.81	5.99							1836	92.83	224.87	17.46		1782	56.34	93.07	6.76
1931	59.56	119.86	4.52							1836	91.81	225.48	20.64		1786	221.86	98.74	11.88
1931	58.87	119.71	6.05							1836	91.45	225.5	22.66		1786	221.27	97.28	12.32
1931	58.88	120.08	5.17							1836	91.97	226.02	21.56		1786	222.56	98.54	15.1
1931	58.6	120.15	4.84							1836	92.46	226.21	22.75		1792	201.97	99.84	38.68
1931	58.52	120.62	5.02							1836	91.7	226.52	23.84		1792	203.6	98.86	34.91
1931	58.54	119.82	5.38							1836	90.38	225.81	19.33		1792	202.55	100.65	35.36
1931	58.8	121.05	6.07							1836	90.65	225.98	17.92		1792	203.65	98.61	31.14
1931	58.19	120.08	4							1836	90.1	227.55	20.07		1792	201.98	102.54	34.57
1931	58.24	121.36	6.61							1836	89.65	231.26	22		1796	45.65	146.96	3.17
1931	57.88	121.07	4.68							1836	89.85	233.73	20.27		1796	45.76	147.24	4.21
1931	58.39	121.68	7.36							1836	90.42	235.57	18.78		1796	47.44	145.03	4.29
1931	58.1	120.33	5.79							1836	89.67	235.51	19.32		1799	104.6	160.71	2.07
1931	59.42	121.6	4.24							1836	90.01	235.69	19.65		1799	102.65	161.48	1.67
1931	58.39	120.71	7							1836	90.51	235.58	17.18		1802	95.88	238.65	3.58
1931	59.29	121.3	4.62							1836	89.53	235.62	17.19		1802	96.28	237.46	2.31
1931	59.05	121.41	6.84							1836	90.01	235.76	18.71		1805	41.12	169.04	15.65
1931	59.23	120.71	4.29							1836	89.98	236.12	17.34		1805	38.96	170.16	11.23
1931	59.08	121.01	5.41							1836	90.52	235.96	16.69		1808	22.11	181.08	34.71
1931	58.78	120.85	7.08							1836	89.73	235.84	18.81		1808	25.17	178.25	33.73
1931	58.34	121.25	6.46							1836	88.74	236.02	17.81		1811	3.91	134.03	3.98
1931	58.11	120.49	5.75							1836	87.7	235.52	18.61		1811	4.49	133.7	2.04
1931	58.96	120.16	6.2							1836	88.74	235.73	17.7		1869	148.46	230.65	4.36
1931	58.2	120.42	5.71							1836	89.75	236.65	17.98		1869	147.44	230.36	3.51
1931	59.22	120.54	8.1							1836	89.69	237.4	18.46		1869	149.17	231.14	3.14
1931	58.72	121.06	6.95							1836	88.08	236.16	17.08		1869	148.9	231.19	3.7
1931	58.21	121	5.86							1836	87.9	235.83	16.97		1869	150	232.22	3.38
1931	57.75	121.12	5.85							1836	86.87	235.63	18.08		1869	149.54	232.43	3.52
1931	57.76	121.33	6.6							1836	88.45	235.71	15.84		1869	151.88	233.46	5.45
1931	58.15	121	5.11							1836	88.18	235.91	14.37		1869	151.61	232.33	2.68
1931	58.21	120.77	4.79							1836	88.29	235.71	14.2		1869	151.4	232.65	4.13
1931	57.57	120.03	5.16							1836	88.14	235.72	13.01		1869	152.8	232.95	4.74
1931	58.02	120.65	5.13							1836	86.63	237.71	10.21		1869	153.38	233.48	2.17
1931	57.74	121.18	4.75							1836	85.44	238.72	14.79		1869	152.95	233.73	2
1931	57.38	121.6	6.72							1836	84.81	236.84	13.82		1869	152.64	232.76	1.06
1931	57	120.35	4.51							1836	81.26	237.56	14.77		1869	152.65	233.11	4.48
1931	57.6	121.05	5.31							1836	77.34	238.99	13.88		1869	153.45	234.02	4.42
1931	57.41	120.58	4.82							1836	76.16	239.27	14.97		1869	153.2	233.01	4.13
1931	57.26	120.37	6.86							1836	75.14	238.21	14.09		1869	152.57	233.57	4.14
1931	57.66	120.74	4.76							1836	74.61	237.33	12.99		1869	152.09	233.5	2.7
1931	58.18	121.59	5.69							1836	75.38	236.46	13.61		1869	151.18	233.18	4.12
1931	57.91	121.82	5.81							1836	74.82	235.19	14		1869	151.39	231.7	6.15
1931	58.22	122.33	6.95							1836	75.75	235.3	15.66		1869	149.61	233.14	5.69
1931	58.04	121.52	5.08							1836	75.49	235.25	17.62		1869	149.98	232.23	4.47
1931	57.23	120.96	5.62							1836	75.52	234.81	15.83		1869	151.71	232.13	3.77
1931	57.29	120.88	5.01							1836	75.38	234.16	14.6		1869	153.39	232.79	3.7
1931	58.33	121.38	6.67							1836	75.1	233.88	13.1		1869	153.96	233.17	5.63
1931	58.55	121.82	8.98							1836	75.64	234.02	12.28		1869	153.43	232.78	4.05
1931	58.9	121.58	6.45							1836	75.65	232.64	10.59		1869	155.24	233.58	6.65
1931	58.6	121.25	4.81							1836	75.97	231.94	10.32		1869	155.21	233.13	5.12
1931	59.66	121.84	5.89							1836	77.44	231.68	8.22		1869	155.23	233.95	5.78
1931	58.85	120.72	5.43							1836	76.75	232.04	7.84		1869	155.22	233.94	4.15
1931	59.23	121.88	5.64							1836	76.92	232.1	5.56		1869	155.46	233.74	5.14
1931	58.81	121.84	3.48							1836	76.29	231.76	5.13		1869	156.44	233.49	7
1931	59.75	122.91	6.18							1836	74.53	230.39	4.73		1869	155.97	233.53	4.96
1931	58.66	121.7	6.35							1836	74.33	229.14	4.01		1869	154.26	233.22	5.65
1931	59.8	122.71	7.61							1836	73.97	229.52	4.23		1869	154.66	233.83	5.66
1931	60	122.38	5.59							1836	73.93	229.59	6.33		1869	154.5	233.45	7.41
1931	59.75	123.14	6.09							1836	73.83	230.32	6.62		1869	155.31	233.27	6.36
1931	59.3	121.92	6.35							1836	72.55	231.4	7.64		1869	155.2	234.14	6.3
1931	59.58	122.17	5.55							1836	70.67	233.67	5.65		1869	155.49	234.26	4.95
1931	59.23	122.54	6.8							1836	67.42	237.01	4.8		1869	155.9	234.21	6.77
1931	59.53	122.66	6.3							1836	66.3	237.5	4.24		1869	155.81	233.91	6.1
1931	60.2	123.69	8.73							1836	65.85	237.39	6.03		1869	155.28	234.55	5.63
1931	60.04	123.19	6.24							1836	66.28	237.86	6.23		1869	155	234.16	5.85
1931	60.84	124.32	7.41							1836	65.78	238.05	6.94		1869	155.41	233.8	4.29
1931	60.62	124.88	11.22							1836	65.29	238.4	6.73		1869	154.51	234.09	8.27
1931	60.95	123.64	7.7							1836	63.81	238.82	7.18		1869	153.93	234.41	6.23
1931	60.7	122.82	9.18							1836	64.28	240.3	5.64		1869	155.51	234.43	4.42
1931	60.52	123.11	8.54							1836	65.95	241.83	7.33		1869	155.29	234.89	5.47
1931	60.67	123.47	5.59							1836	67.73	242.09	6.57		1869	155.73	234.55	5.06
1931	61.26	123.54	7.49							1836	69.46	243.63	7.59		1869	155.9	234.67	5.59
1931	61.01	123.74	6.11							1836	71.4	245.87	8.57		1869	156	234.05	4.23
1931	59.47	123.06	6.43							1836	73.61	244.65	9.19		1869	156.08	235.33	5.86
1931	60.28	123.12	7.24							1836	75.69	244.16	8.81		1869	156.16	234.56	7.98
1931	59.91	123.9	5.96							1836	76.77	242.95	8.02		1869	155.74	234.42	6.45
1931	60.95	124.28	5							1836	76.83	242.39	8.61		1869	156.28	234.68	3.7
1931	60.88	124.28	7.72							1836	78.86	242.67	8.06		1869	156.23	234.66	7.09
1931	60.5	123	6.07							1836	80.51	243.28	7.26		1869	157.77	237.25	6.25
1931	60.58	122.33	9.69							1836	80.9	243.08	7.73		1878	127.29	189.37	16.51
1931	59.32	123.49	6.73							1836	81.4	243.67	6.66		1878	128.37	189.34	16.3
1931	60.49	123.82	5.69							1836	81.36	243.33	3.99		1878	125.91	189.39	17.92
1931	61.29	123.84	6.56							1836	80.92	245.39	6.26		1878	126.94	188.94	16.74
1931	61.28	124.59	4.1							1836	80.45	245.51	7.42		1878	126.83	188.76	15.88
1931	61.49	124.93	5.54							1836	79.77	245.64	6.7		1878	126.54	189.09	16.03
1931	60.94	124.47	5.54							1836	81.16	243.42	4.93		1878	126.33	188.47	14.78
1931	60.42	124.11	7.14							1836	81.28	242.03	4.04		1878	126.52	188.04	16.75
1931	61.11	124.59	6.61							1836	80.91	241.86	9.2		1882	80.77	4	26
1931	61.47	124.27	6.56							1836	80.39	241.2	12.21		1882	79.57	2.6	24.36
1931	61.05	125.01	7.87							1841	314.35	311.99	30.15		1882	80.68	1.42	23.88
1931	60.98	124.17	4.41							1841	314.35	312.19	33.26		1893	217.97	98.91	8.56
1931	61.34	124.65	7.45							1841	314.22	312.42	32.39		1893	220.73	98.32	9.98
1931	62.2	125.24	9.69							1841	318.53	311.68	29.57		1893	223.35	99.51	13.55
1931	62.58	125.53	5.36							1844	169.99	206.14	31.52		1893	224.24	102.13	14.94
1931	62.58	125.93	5.02							1844	170.27	206.61	29.9		1893	223.97	98.54	14
1931	62.65	125.77	6.32							1853	112.51	210.46	48.12		1893	223.4	98.33	12.3
1931	61.19	125.65	3.95							1853	112.81	209.5	50		1893	223.32	97.65	12.63
1931	62.15	124.72	6.95							1853	116.75	208.47	48.27		1893	224.39	97.59	15.75
1931	60.54	124.53	7.73							1853	118.26	205.88	47.14		1893	223.82	97.2	10.77
1931	62.72	125.78	3.58							1853	119.44	204.76	48.75		1893	223.92	97.73	12.03
1931	63.07	125.98	3.17							1853	122.97	202.49	49.55		1897	250.04	98.96	11.6
1937	23.93	239.46	11.06							1853	126.54	202.7	53.86		1897	250.35	97.01	11.51
1937	23.62	239.16	11.39							1853	125.57	203.44	50.34		1897	250.16	95.21	7.9
1937	23.23	239.43	12.07							1856	152.66	165.85	12.96		1900	217.32	100.06	9.31
1937	23.21	239.59	12.6							1856	153.59	165.77	12.1		1900	214.67	102.49	8.43
1937	24.39	239.52	12.35							1891	173.34	94.34	34.97		2029	48.47	151.78	15.41
1942	237.68	34.56	35.24							1891	172.56	94.32	34.33		2029	49.04	152.62	16.67
1942	234.36	31.51	30.35							1891	172.84	93.7	34.49		2029	48.61	151.92	15.07
1942	238.48	32.35	31.3							1891	172.31	94.25	34.95		2029	50.54	151.21	19.27
1942	237.27	39.22	34.08							1891	171.82	92.91	35.29		2029	50.53	151.87	18.3
2038	72.4	204.84	6.01							1891	172.92	94.78	35.54		2029	51.53	151.74	20.98
2038	72.43	205.94	6.07							1891	172.87	94.89	34.52		2029	51.23	153.17	23.4
2038	72.58	204.54	5.25							1891	172.93	95.19	37.4		2029	50.47	153.39	27.1
2038	71.53	203.46	5.85							1891	172.22	94.94	36.47		2029	50.34	154.71	26.01
2038	72.04	203.17	6.89							1891	171.28	94.39	37.23		2029	51.17	154.65	29.03
2038	71.5	203.52	6.44							1891	171.31	93.89	34.74		2029	52.36	155.54	22.65
2038	72.1	202.67	4.38							1891	170.43	93.07	36.62		2029	50.98	157.09	26.31
2038	72.75	202.23	5.22							1891	172.13	93.3	34.95		2029	51.46	156.93	25.98
2038	71.95	202.57	4.68							1891	170.66	92.72	36.45		2029	52.48	158.58	25.41
2038	71.47	202.75	5.54							1891	169.58	93.52	37.56		2029	52.6	157.91	25.77
2038	72.32	204.06	7.58							1891	169.86	93.58	37.07		2029	52.39	158.23	25.27
2038	70.25	206.13	8.81							1891	169.33	92.95	36.49		2029	51.5	158.24	25.62
2038	70.44	206.27	9.21							1891	169.45	92.91	37.2		2029	49.52	157.73	24.94
2038	72.54	202.99	5.08							1891	169.93	92.94	37.56		2029	49.38	159.59	21.07
2038	72.04	203.15	6.68							1891	170.78	92.6	37.59		2029	47.69	159.62	21.2
2038	71.47	204.39	9.22							1891	173.78	92.63	35.85		2029	48.96	160.56	21.29
2038	73.29	202.38	5.95							1891	174.75	93.24	35.12		2029	49.62	161.27	20.14
2038	73.11	201.18	6.12							1891	175.73	92.99	36.37		2029	50.53	161.49	20.78
2038	72.44	203.91	8.85							1891	175.53	93.77	35.73		2029	51.62	164.36	22.84
2038	73.03	202.51	7.63							1891	175.35	93.67	35.98		2029	52.36	165.23	25.83
2038	72.76	201.93	7.45							1891	173.59	93.51	35.03		2029	51.77	165.38	26.27
2038	73.03	201.44	5.82							1891	173.9	94.1	36.82		2029	52.19	165.64	26.46
2038	72.06	203.87	9.14							1891	173.26	93.42	35.28		2029	52.99	165.17	27.2
2038	72.76	201.17	4.67							1891	172.18	93.02	33.6		2029	54.91	163.49	27.25
2038	73.18	201.47	5.13							1891	172.03	93.42	34.54		2029	56.33	162.78	30.74
2038	72.85	201.2	4.96							1891	170.83	92.88	35.21		2029	56.31	161.89	29.35
2038	72.69	202.03	4.11							1891	173.13	94.11	35.57		2029	53.46	160.13	22.88
2038	72.74	203.27	5.52							1891	172.18	92.65	36.33		2029	52.63	159.8	18.76
2038	72.42	201.89	4.46							1891	171.96	92.58	34.51		2029	53.17	158.45	18.91
2038	72	201.48	4.34							1894	161.64	28.8	35.19		2029	52.89	157.12	18.77
2038	72.51	200.81	5.22							1894	162.29	29.48	33.94		2029	52.82	157.32	19.32
2038	72.48	200.72	5.79							1898	224.53	128.64	34.19		2029	52.71	157.66	19.54
2038	72.9	200.93	5.4							1898	224.01	128.49	33.03		2029	53.46	157.82	19.17
2038	72.9	200.59	5.56							1898	224.72	130.17	32.69		2029	54.79	158.42	18.48
2038	72.71	201.45	5.3							1917	240.6	76.99	45.6		2029	56.5	158.82	18.52
2038	72.38	200.86	5.02							1917	240.77	75.92	47.2		2029	57.18	158.97	16.94
2038	72.86	200.8	5.43							1917	240.9	76.2	45.18		2029	57.93	159.34	17.56
2038	71.82	201.8	6.36							1917	240.45	76.33	46.29		2029	58.07	159.51	18.36
2038	71.7	201.04	5.86							1917	241.41	75.82	43.31		2029	57.92	160.24	19.51
2038	72.36	202.08	6.07							1917	241.91	75.98	40.26		2029	56.81	161.01	21.01
2038	72.91	201.09	6.54							1917	242.72	74.92	40.55		2029	56.9	160.66	20.88
2038	73.73	200.96	6.25							1917	245.4	73.31	40.23		2029	57.54	161.74	21.23
2038	73.52	201.55	5.71							1917	249.95	70.15	38.91		2029	57.86	161.77	23.64
2038	73.05	202.08	5.84							1917	253.76	71.6	40.02		2029	58.64	162.37	24.22
2038	73.67	201.54	5.18							1917	256.6	73.39	40.23		2029	58.44	161.95	23.21
2038	73.25	201.54	5.57							1917	255.52	77.2	42.98		2029	58.47	163.41	24.38
2038	68.88	201.11	11.04							1917	254.92	78.49	44.5		2029	58.65	164.57	23.89
2038	69.71	201	9.13							1917	253.71	80.37	49.33		2029	57.9	164.53	21.6
2038	71.3	201.23	10.24							1917	252.43	81.43	47.39		2029	57.13	164.41	21.92
2038	71.06	200.92	9.64							1917	251.79	83.34	48.56		2029	57.01	164.41	21.38
2038	71.92	201.06	9.15							1917	252.48	83.63	50.64		2029	55.86	165.13	22.51
2038	72.2	200.45	7.76							1917	252.95	85.56	50.64		2029	54.6	166.63	24.06
2038	72.63	200.26	8.18							1925	210.16	75.68	24.13		2029	53.86	165.94	24
2038	73.17	199.65	6.96							1925	210.12	74.48	21.86		2029	53.76	165.64	24.22
2038	73.47	199.78	8.04							1925	210.48	74.44	23.26		2029	53.85	166.21	23.71
2038	73.77	200.35	7.31							1925	209.26	74.65	24.89		2029	53.46	165.58	23.77
2038	73.63	200.63	8.01							1925	211.64	74.84	23.47		2029	52.77	166.45	24.75
2038	74.17	200.51	8.42							1925	211.78	75.42	24.55		2029	52.65	166.7	25.39
2038	74.79	199.5	8.47							1925	210.51	75.78	25		2029	52.42	166.1	25.01
2038	74.83	199.35	8.78							1928	326.44	126.85	22.01		2029	52.35	166.41	24.46
2038	75.06	199.42	9.26							1928	325.45	126.55	20.92		2029	52.26	166.42	25.92
2038	74.96	198.86	10.48							1933	164	202.35	23.02		2029	52.05	167	24.45
2038	77.14	199.77	14.69							1933	166.71	203.9	18.88		2029	51.39	167.03	25.96
2038	75.04	198.69	10.41							1933	164.53	201.67	24.71		2029	50.99	166.78	25.8
2038	75.08	199.01	11							1933	164.4	201.83	25.35		2029	50.77	167.42	28.32
2038	76.33	199.38	13.01							1937	97.2	46.48	42.88		2029	51.04	167.75	27.58
2038	75.03	198.42	10							1937	97.51	46.97	50		2029	50.34	167.88	27.05
2038	74.53	197.41	8.38							1937	101.48	48.01	47.39		2029	49.28	167.95	27.41
2038	74.65	198	8.3							1941	145.29	7	58.48		2029	48.01	168.32	26.03
2038	74.67	197.33	8.13							1941	144.77	6.48	62.05		2029	47.22	168.78	27.29
2038	74.46	198.02	8.54							1941	143.52	6.11	61.67		2029	46.57	170.58	25.72
2038	74.69	198.36	10.44							1946	110.99	84.46	38.71		2029	47.13	170.64	24.57
2038	74.65	198.33	11.4							1946	110.12	84.09	37.52		2029	48.68	169.67	25.81
2038	74.33	199.35	12.89							1946	110	83.4	36.74		2029	48.25	170.29	24.14
2038	74.37	200.64	16.33							1946	110.34	83.69	37.27		2029	49.14	169.71	25.66
2038	73.99	200.48	13.96							1966	124.43	212.41	4.91		2029	48.79	170	23.91
2038	73.4	199.29	13.12							1966	124.57	212.71	5.26		2029	48.68	170.94	24.61
2038	73.4	202.12	15.23							1966	123.83	212.53	5.32		2029	48.02	173.08	23.17
2038	74.56	204.09	17.39							1966	123.55	212.04	4.93		2029	48.42	175.14	23.6
2038	75.66	203.2	18.25							1966	125.19	208.52	6.25		2029	49.49	177.38	23.58
2038	75.86	203.19	19.59							1966	123.42	211.53	5.14		2029	52.33	180.86	25.05
2038	75.5	203.23	18.84							1966	122.85	212.23	4.95		2029	54.34	181.26	26.33
2038	75.78	202.5	21.04							1966	122.33	211.98	5.36		2029	53.74	182.43	25.63
2038	76.31	202.02	24.03							1966	122.95	211.83	5.19		2029	52.51	182.51	24.87
2038	75.16	202.43	21.88							1966	122.21	213.03	5		2029	52.39	182.25	23.35
2038	75.49	201.75	20.8							1966	121.73	212.31	5.09		2029	51.68	181.71	20.67
2038	76.15	201.61	20.18							1966	121.64	214.09	6.06		2029	51.39	180.15	19.46
2038	76.8	201.98	20.81							1966	121.89	212.87	5.41		2029	51.74	179.34	18.98
2038	76.96	203.04	21.36							1966	121.39	213.13	4.65		2029	51.49	179.57	15.9
2038	77.28	203.94	19.6							1966	120.83	213.26	4.53		2029	51.63	179.56	16.01
2038	78.25	204.64	20.16							1966	120.78	213.58	4.03		2029	51.88	177.57	13.75
2038	77.53	204.01	24.03							1966	121.06	212.74	4.21		2029	51.21	179.28	14.99
2038	77.52	204.45	20							1966	121.63	213.19	5.2		2029	50.77	179.89	16.66
2038	78.07	205.93	18.23							1966	121.55	214.23	4.62		2029	51.18	179.03	15.05
2038	77.77	206	20.3							1970	14.05	254.7	2.69		2029	51.33	177.17	15.26
2049	70.35	149.3	25.26							1970	13.49	254.84	2.54		2029	51.52	175.67	14.44
2049	69.84	149.12	28.3							1970	14.06	255.37	1.81		2029	51.29	176.07	12.66
2049	69.44	151.43	26.26							1974	301.68	156.22	22.47		2029	50.64	175.69	12.53
2049	69.78	152.22	24.67							1974	302.52	156.13	23.09		2029	49.56	175.72	12.97
2049	68.53	154.66	24.69							1974	301.4	157.28	22.74		2029	49.37	175.53	11.93
2049	68.6	156.4	27.17							1979	128.48	213.99	26.23		2029	48.66	176.29	14.86
2049	67.77	156.41	26.1							1979	127.52	218.66	27.46		2029	48.11	175.61	14.65
2049	67.52	157.68	27.17							1979	128.37	218.25	24.73		2029	47.6	175.09	14.99
2049	68.17	159.8	33.03							1979	126.85	220.26	21.06		2029	47.44	174.77	15.17
2049	68.1	159.67	26.98							1982	3.8	5.8	16.3		2029	47.03	173.7	18.33
2083	31.42	216.23	15.91							1982	5.62	7.73	13.3		2029	47.16	174.01	16.4
2083	32.8	221.1	15.96							2007	209.62	179.12	10.93		2029	46.74	173.95	16.78
2083	34.65	224.51	15.32							2007	209.36	177.92	10.19		2029	46.03	174.07	19.71
2083	35.46	225.07	15.59							2007	211.92	182.34	10.08		2029	46.79	174.43	16.31
2083	37.78	226.49	15.24							2007	210.83	181.34	10.22		2029	46.29	174.68	19.4
2083	38.97	227.79	16.76							2007	210.72	179.52	12.55		2029	46.73	175.19	18.2
2083	40.7	229	16.1							2007	211.86	180.72	9.81		2029	46.29	174.03	18.27
2083	40.68	228.89	17.9							2007	211.33	179.91	11.23		2029	46.64	174.03	18.73
2083	38.22	228.24	16.88							2007	211.62	180.61	10.46		2029	47.01	173.82	18.42
2083	37.07	228.4	18.22							2007	210.79	180.27	9.69		2029	46.45	173.79	17.62
2083	36.28	228.44	17.91							2007	212.05	181.13	11.06		2029	46.37	173.64	16.93
2083	35.06	228.54	16.56							2007	211.47	179.86	10.51		2029	45.28	173.21	17.76
2083	34.25	229.97	17.57							2007	210.72	179.42	11.59		2029	44.15	172.33	16.49
2083	33.82	230.33	18.36							2007	211.2	178.81	11.57		2029	43.01	171.39	16.22
2083	34.7	229.47	19.35							2007	212.03	179.94	11.81		2029	42.49	171.04	14.42
2083	35.23	229.08	17.27							2007	210.83	178.85	11.48		2029	42.31	169.91	14.67
2083	34.45	228.35	16.79							2007	209.83	178.93	10.74		2029	41.04	170.32	12.27
2083	34.34	229.38	19.15							2007	210.34	178.69	10.8		2029	39.64	169.22	12.86
2083	33.5	229.75	18.85							2007	212.62	180.64	12.03		2037	44.94	145.45	2.57
2083	34.36	230.31	20.98							2007	211.16	180.65	12.69		2037	44.61	145.2	3.2
2083	35	229.96	20.01							2007	209.3	178.95	10.92		2037	44.11	146.36	3.19
2083	34.73	230.43	19.99							2007	208.86	178.09	8		2037	44.48	145	2.74
2083	33.77	229.92	22.37							2007	209.4	179.22	9.97		2037	45.07	144.17	5.82
2083	34.35	230.16	24.42							2007	210.48	179.11	12.43		2037	43.29	147.98	2.75
2083	35.06	229.8	24.24							2007	209.38	179.22	11.2		2037	42.99	147.48	3.36
2083	34.3	229.38	21.4							2041	149.52	2.64	33.2		2040	3.67	134.3	2.1
2083	34.86	229.72	22.2							2041	149.39	3.07	32.46		2040	4.04	133.75	5.91
2083	35.63	230.58	23.57							2041	148.51	3.37	30.65		2066	211.17	74.3	34.54
2083	35.27	231.62	25.05							2041	148.78	3.62	30.56		2066	211.38	75.45	32.38
2083	35.58	232.9	26.17							2041	149.91	4.27	31.98		2066	212.63	74.94	32.53
2083	38.66	233.33	27.5							2041	151.33	4.87	32.88		2066	210.73	75.18	30.76
2083	42.33	229.97	33.17							2041	152.75	5.25	32.36		2066	211.46	74.76	32.72
2083	41.34	229.97	31.92							2041	153.3	5.66	32.96		2066	211.45	75.11	31.2
2092	12.83	73.95	31.13							2041	157.12	5.9	28.2		2066	210.92	74.71	33.3
2092	14.4	72.16	24.18							2041	156.65	6.75	29.9		2066	211.94	73.15	32.19
2092	10.31	74.79	28.61							2041	158.56	7.05	27.86		2066	211.41	75.84	31.31
2092	7.73	75.28	25.85							2041	159.29	7.77	27.69		2066	211.73	75.24	32.47
2092	5.97	75.87	28.66							2041	160.63	8.76	28.19		2066	212.51	74.6	31.02
2092	5.05	76.71	26.52							2041	161.11	7.98	28.7		2066	210.94	75.34	33.98
2092	3.54	75.73	25.96							2041	162.49	8.77	26.93		2066	210.39	75.97	33.24
2092	3.02	75.38	24.96							2041	162.46	9.7	28.38		2066	211.57	75.21	33.42
2097	213.13	139.67	12.61							2041	161.01	11.52	28.31		2066	211.09	74.55	31.65
2097	212.81	139.53	15.15							2041	166.41	9.82	27.79		2066	211.75	74.36	32.53
2097	214.61	139.92	12.66							2041	170.95	7.7	26.37		2066	212.44	74.09	31.82
2097	213.3	139.05	13.1							2041	167.99	7.23	25		2066	206.1	73.14	36.6
2105	72.02	226.72	16.04							2041	164.75	7.94	25.79		2066	207.02	73.27	35.11
2105	71.84	224.95	13.74							2041	166.59	7.51	25.74		2066	206.3	73.49	35.56
2105	71.7	225.31	13.38							2041	165.4	7.68	26.33		2066	206.99	73.57	34.82
2105	71.22	223.56	15.45							2041	164.6	7.58	25.34		2066	206.29	73.8	37.71
2105	71.07	222.45	13.61							2041	164.5	7.21	26.46		2066	207.77	73	38.39
2105	70.92	222.22	13.41							2041	163.22	7.28	25.72		2066	206.89	72.32	40
2105	71.09	220.25	14.09							2041	163.97	7.09	25.71		2066	207.35	72.64	39.06
2110	12.02	107.89	7.82							2041	164.3	7.15	25.7		2144	243.94	56.86	10.91
2110	12	107.97	6.01							2041	164.48	7.29	25.14		2144	241.45	55.04	11.77
2110	10.99	107.63	8.22							2041	165.47	7.16	24.86		2144	241.09	54.57	11.22
2110	11.63	108.67	7.85							2041	163.29	7.03	23.93		2144	241.25	54.75	11.46
2113	193.7	187.04	22.47							2041	163.63	6.89	24.85		2144	242.93	55.96	11.91
2113	196.14	187.97	19.44							2041	168.17	6.11	25.7		2144	241.77	55.16	10.25
2117	142.91	249.26	27.65							2046	160.77	29.18	35.14		2144	241.93	56.55	11.25
2117	142.64	249.33	26.87							2046	160.74	28.08	35.94		2144	243.34	58.14	11.44
2117	141.29	248.69	29.1							2046	162.15	27.48	35.73		2144	242.63	58.64	10.91
2120	235.06	73.07	15.67							2046	161.74	28.34	34		2144	242.4	59.57	11.64
2120	235.43	70.02	9.43							2062	171.69	215.79	17.51		2144	243.03	59.96	11.26
2164	45.35	88.86	34.22							2062	171.86	215.98	18.16		2144	243.24	61.21	10.61
2164	45.1	87.53	33.87							2062	172.63	215.49	20.26		2144	243.09	61.25	11.17
2164	45.79	87.09	32.82							2062	174.73	215.19	13.83		2144	242.89	62.14	10
2164	45.7	87.16	33.55							2062	172.78	214.33	19.08		2144	243.41	62.09	10.8
2164	43.19	85.99	33.56							2062	173.54	209.81	16.79		2144	244.05	62.89	12.56
2164	40.73	84.36	31.7							2062	172.93	209.55	19.1		2144	244.45	62.95	11.03
2164	41.52	84.95	31.99							2062	172.61	209.24	17.33		2144	244.52	64.1	12.03
2164	40.43	84.48	33							2062	172.73	208.56	15.55		2144	244.11	64.44	12.88
2164	38.88	83.28	32.66							2062	172.03	206.03	17.36		2144	243.76	63.5	11.43
2164	36.69	82.87	33.69							2062	172.8	208.75	17.44		2144	244.07	64.43	12.37
2164	35.4	81.19	34.52							2062	172.28	207.06	20.46		2144	243.92	63.94	13.54
2164	34.67	80.99	35.56							2062	172.73	207.25	14.7		2144	243.7	62.32	11.75
2164	35.75	81.68	31.26							2062	172.78	206.33	18.64		2144	244.41	64.52	10.96
2164	35.36	81.37	33.35							2062	172.91	205.8	22.41		2144	244.39	62.73	13.05
2164	34.64	81.84	30.95							2067	58.39	74.51	23.63		2144	244.89	63.58	14.34
2164	34.73	81.59	33.29							2067	63.3	77.68	21.23		2144	245.05	63.52	13.18
2164	35.23	81.7	32.31							2067	67.87	78.31	21.05		2144	244.64	63	12.79
2164	34.16	79.64	32.84							2067	72.81	82.84	24.8		2144	245.7	63.54	14.22
2164	35.88	81.67	28.48							2077	147.76	204.47	24.16		2144	244.9	63.79	13.38
2164	34.41	79.74	33.51							2077	150.45	202.53	19.58		2144	245.58	64.06	12.08
2164	37.28	82.14	29.24							2077	153.26	203.26	20.4		2144	246.64	65.45	10.46
2164	36.42	82.89	30.92							2077	154.9	203.64	19.16		2144	246.85	65.34	12.56
2164	37.68	83.67	30.08							2077	155.11	203.34	21.03		2144	246.04	63.99	11.86
2164	38.38	83.86	31.41							2077	157.11	203.52	19.98		2144	247.93	65.53	10.6
2164	38.31	83.18	30.93							2077	157.09	203.46	17.6		2144	247.94	66.78	10.94
2164	38.34	83.26	29.46							2077	158.39	203.29	16.03		2144	250.62	68.45	8.74
2164	37.65	82.73	28.58							2077	154.93	204.01	16.34		2144	251.12	68.33	8.14
2164	38.98	83.06	28.42							2080	36.24	78.68	32.75		2144	251.54	68.99	9.14
2164	38.6	83.19	30.85							2080	36.93	77.56	33.29		2144	251.84	70.17	9.22
2164	38.82	83.39	31.06							2194	99.82	144.11	61.29		2144	251.54	71.03	8.05
2164	40.62	84.68	32.42							2194	100.51	143.68	61.22		2144	251.51	70.92	8.57
2164	36.65	81.76	30.35							2194	98.22	143.39	56.05		2144	251.26	71.14	7.87
2164	35.99	81.9	31.01							2194	96.18	144.35	55.99		2144	251.52	71.79	8.66
2164	41.12	83.67	32.49							2194	97.53	144.05	55.81		2144	251.49	72.61	7.57
2164	40.37	83.33	32.96							2194	98.92	142.96	55.82		2144	251.55	72.37	8.72
2164	41.67	82.64	32.82							2194	101.03	141.46	53.54		2144	251.61	72.2	7.81
2164	40.5	83.35	31.98							2194	101.95	141.91	53.67		2144	251.13	72.48	7.6
2164	41.25	83.12	31.49							2194	102.73	140.55	53.53		2144	251.21	72.08	7.96
2164	42.54	81.6	32.59							2194	103.95	139.84	54.55		2144	251.55	72.18	7.59
2164	42.31	81.55	31.87							2194	104.59	140.17	53.57		2144	251.63	71.75	7.88
2164	41.32	81.87	31.82							2194	104.31	140.77	53.7		2144	251.34	71.49	8.22
2164	41.95	81.71	32.43							2194	105.14	140.98	54.68		2144	251.39	71.69	8.15
2164	44.34	81.11	31.94							2194	105.66	140.35	54.89		2144	251.43	71.12	8.43
2168	19.17	84.52	33.23							2194	106.14	140.07	51.81		2144	251.73	71.48	8.42
2168	20.55	85.04	35							2194	106.49	140.18	52.63		2144	251.67	71.66	8.15
2168	18.17	85.46	39.27							2194	106.35	137.6	51.18		2144	252	71.96	7.65
2171	50.55	136.54	7.67							2194	105.96	137.26	56.38		2144	251.62	72.49	6.71
2171	51.34	136.85	5.35							2194	109.02	133.23	56.96		2144	251.75	72.53	7.48
2183	216.25	30.65	7.13							2194	110.87	131.26	57.34		2144	251.74	73.27	7.51
2183	217.22	29.18	9.76							2194	112.57	129.28	58.01		2144	251.85	72.74	7.02
2183	217.27	29.1	9.45							2194	115.08	126.73	59.26		2144	251.56	72.89	6.79
2183	216.51	29.58	9.01							2194	116.49	123.74	56.9		2144	251.72	72.48	7.5
2183	216.19	30.12	6.53							2194	114.82	122.95	57.11		2144	251.24	72.47	7.27
2183	216.99	30.5	9.27							2194	114.54	121.6	56		2144	251.75	72.13	7.98
2183	216.57	30.25	8.36							2194	113.68	118.77	53.78		2144	251.86	72.52	8.48
2183	216.54	30.65	7.16							2194	113.1	118.02	53.44		2144	251.68	72.39	7.99
2183	216.07	30.18	5.55							2194	112.79	117.4	52.81		2144	251.69	72.83	7.03
2183	218.17	30.03	5.25							2194	111.25	117.1	57.67		2144	251.8	72.54	7.86
[truncated: 7,378 more rows]

## Sheet: 3B
All PTCRA-EGFP
pDC Track Velocity (μm/min)					pDC Displacement Rate (μm/min)
WT Naive	WT PyYM	Tlr7-/y naive	Tlr7-/y PyYM		WT Naive	WT PyYM	Tlr7-/y naive	Tlr7-/y PyYM
4.206	1.116	2.844	6.96		0.1914	0.0324	0.1308	0.666
4.152	1.518	3.216	5.064		0.261	0.102	0.1482	0.3654
6.18	1.62	3.21	10.08		0.3126	0.1608	0.3198	0.756
3.042	1.764	5.274	7.5		0.0852	0.2556	0.864	3.654
5.922	2.226	4.8	7.5		0.5016	0.2388	1.578	2.364
4.962	2.07	3.48	7.32		1.374	0.696	0.1134	3.408
5.874	1.32	4.422	6.6		0.636	0.3108	0.2364	2.628
9.12	2.148	5.394	6.72		3.558	0.1158	0.3012	2.076
6.42	1.968	3.816	8.64		1.56	0.1986	1.218	3.066
5.232	1.476	5.382	4.764		0.45	0.04842	2.658	0.5532
7.32	3.312	7.56	9		2.736	0.4524	1.872	4.548
8.16	1.782	4.542	9.36		2.118	0.1698	1.926	2.778
6.54	1.842	2.634	9.54		1.14	0.0834	0.69	1.734
7.38	2.262	3.696	8.82		0.4968	0.2922	1.158	1.764
5.484	2.238	3.246	6.3		1.626	0.2802	1.248	0.4326
4.326	1.05	7.98	4.368		1.14	0.327	3.456	0.714
3.342	2.406	6.9	6.66		0.4758	0.0936	2.82	1.296
8.04	1.932	6.18	8.88		1.422	0.147	0.672	4.02
7.68	1.92	8.34	6.9		1.206	0.972	4.014	1.152
5.802	2.892	5.724	6.72		2.298	0.702	1.506	2.388
10.26	2.364	5.976	10.62		0.96	0.696	4.524	2.076
6.06	2.094	3.384	10.14		1.566	0.549	0.0894	3.024
5.112		6.84	6.54		0.4194		3.456	0.564
8.46	6.42	7.2	7.02		1.866	0.1416	2.856	3.18
11.22	7.02	3.3	9.18		2.664	0.63	0.384	1.164
6.48	8.22	5.844	8.64		0.429	1.446	1.71	2.256
4.638	6.78	5.148	6.84		0.5862	0.2448	2.292	3.264
6.66	8.46	3.246	8.4		0.768	2.022	0.372	5.562
9.48	4.68	4.47	9.36		3.792	1.8	1.008	0.99
5.532	3.42	5.484	10.98		0.66	0.0642	1.932	1.41
8.58	4.674	4.452	9.12		5.352	0.1746	0.744	4.116
5.922	5.388	3.546	10.92		0.846	0.2112	0.156	2.4
3.456	5.19	6.66	10.8		0.858	0.864	2.1	3.816
5.532	5.868	2.898	6.84		0.2262	0.726	0.4278	3.684
8.22	6.18	4.542	5.802		0.918	0.084	0.03636	0.258
8.58	9	4.65	7.86		3.234	3.894	1.434	0.4032
6.06	3.402	7.98	9.24		0.768	0.1164	1.8	4.284
6.12	5.058	4.758	7.98		1.734	1.458	1.35	0.786
6.3	3.81	4.938	6.48		0.612	0.3468	0.4782	2.49
6.42	4.56	3.708	8.88		1.05	0.3234	0.5826	1.248
9.06	6.84	4.122	9.24		2.058	2.442	0.3192	1.038
6.9	7.38	4.122	9.72		2.808	0.5676	0.3684	1.608
7.98	4.236	2.85	6.9		1.056	0.744	0.1026	0.786
6.72	7.38	3.822	8.82		0.678	0.822	0.4536	1.2
6.48	5.28	3.234	7.8		2.25	0.05868	0.1548	1.05
7.02	5.808	5.49	10.26		1.194	2.208	2.268	1.44
3.672	6.6	3.048	6.9		0.1698	0.798	0.3234	2.286
6.96	4.458	6.72	9.9		1.212	0.1836	5.49	1.476
4.128		4.878	12.96		0.165		1.392	3.852
6.3	4.008	8.82	12.3		2.532	1.752	2.034	5.712
4.434	2.304	5.766	12.12		0.1896	0.774	2.592	4.986
6.36	8.4	8.52	5.97		0.4644	1.176	4.806	2.538
7.32	4.32	4.92	9.12		2.994	2.112	2.31	1.956
7.56	6.3	7.92	10.92		1.83	2.82	4.902	0.774
11.04	7.44	4.878	6.72		5.064	1.686	0.774	2.394
4.65	3.888	4.044	5.616		0.4602	0.4218	1.08	1.56
10.44	8.28	4.326	7.74		0.876	1.596	0.948	1.32
7.26	7.68	2.922	7.2		1.062	1.386	0.4764	1.968
6.96	4.656	4.698	6.72		0.576	2.844	1.296	2.184
6.06	3.738	5.538	5.262		2.766	0.69	1.386	1.398
3.324	4.092	4.848	5.424		1.224	0.966	1.602	1.692
4.596	6.84	3.21	8.82		0.972	1.404	0.2232	2.622
7.74	3.876	3.774	8.82		2.112	0.2802	0.81	2.538
3.81	3.51	7.92	8.22		0.282	0.2364	3.738	3.432
5.34	7.44	2.952	10.14		1.416	1.248	0.1188	2.154
5.082	3.846	6.42	7.56		0.642	0.1998	1.104	0.894
9.72	4.248	6.12	7.26		6.12	1.002	4.938	0.2094
5.97	1.41	4.794	7.56		1.482	0.2706	0.846	1.23
8.94	4.8	6.48	7.14		4.302	0.636	1.386	0.666
5.334	3.9	4.26	7.44		1.002	0.525	0.243	2.412
6.54	5.358	5.238	7.74		4.2	1.512	2.322	4.392
7.56	3.18	6.72	9.06		1.53	0.1518	5.394	2.052
4.932	3.174	7.74	9.6		1.602	0.372	5.568	1.842
13.62	3.876	3.864	6.36		1.836	0.1314	0.2928	0.234
4.542	4.764	4.734	9.9		0.5268	0.2538	1.356	0.708
10.02	5.454	4.662	7.86		0.774	1.29	1.296	1.854
4.53	8.4	2.856	6.66		0.3384	1.05	0.2466	1.638
9.54	5.826	6.72	7.98		2.7	0.4362	2.04	3.216
8.82	4.47	5.124	6.72		1.074	0.354	1.344	0.966
6.96	2.604	5.814	9.48		0.876	0.327	0.816	4.14
8.16	3.36	8.22	9.9		2.94	0.255	4.392	3.744
12.18	4.656	4.554	6.3		3.984	0.5562	0.684	1.146
6.36	8.4	5.61	8.34		0.852	0.6	2.664	0.3366
7.62	7.68	4.944			1.56	0.642	3.156
7.38	3.132	4.086	4.692		2.124	0.612	0.792	0.3318
6.9	3.69	9.06	4.392		1.614	0.1806	5.322	0.84
8.88	5.172	6	4.56		2.424	0.4566	1.074	0.1326
14.7	3.222	7.2	4.506		4.566	0.0756	0.744	0.3402
5.526	5.346	6.96	8.64		0.924	0.5172	1.74	1.266
5.928	7.62	4.398	8.88		2.22	0.3432	1.482	0.5244
9.18	4.782	5.148	7.74		3.654	0.3498	2.382	4.734
7.74	4.236	5.736	3.342		2.394	0.1266	2.43	0.618
14.88	4.938	5.532	7.68		2.4	0.1992	0.4368	0.2616
15.54	4.068	3.51	3.564		5.37	0.05196	0.2166	0.3816
7.92		3.888	9.18		1.608		2.274	3.39
7.14	3.192	5.196	6.06		0.2706	1.182	0.0972	0.4194
9.06	6.48	7.2	11.52		3.294	0.762	2.784	5.016
6.24	6.96	5.316	7.2		3.426	5.124	2.658	0.5076
4.44	4.602	5.532	5.796		0.5286	1.116	1.638	0.2652
6.48	3.666	4.644	6.66		2.844	1.65	0.138	0.5958
7.38	3.654	4.842	13.86		3.54	1.164	1.548	5.352
13.5	3.762	9.18	5.178		4.716	0.984	6	0.02268
7.26	6.24	4.284	5.802		2.4	2.406	0.636	0.3744
8.16	5.712	5.106	7.2		2.322	2.04	0.762	4.464
6.9	3.612	2.934	5.946		1.134	0.822	0.5106	0.252
7.02	4.428	4.074	3.66		3.294	1.488	0.3264	0.3396
4.014	7.44	4.632	6.66		1.092	0.954	1.452	1.158
5.556	3.384	3.504	6.54		1.752	1.17	1.824	0.309
7.02	3.936	5.436	13.86		1.158	1.62	0.507	0.2526
7.2	6.96	4.632	7.5		2.814	1.878	0.714	3.174
9.48	6.18	5.634	5.79		2.55	0.3138	1.098	0.4836
5.496	5.952	5.496	3.93		1.17	1.182	0.414	1.152
7.26	6.66	2.922	5.058		0.966	1.362	0.3882	1.428
12	6.9	2.688	4.23		5.616	0.876	0.321	1.062
7.98	4.434	6.18	5.424		1.344	1.5	2.088	0.3372
11.76	5.862	5.346	6.18		1.752	2.31	0.912	2.304
5.466	6.48	4.998	7.38		0.4716	1.92	1.2	0.78
2.838	9.66	3.372	5.772		0.447	0.816	0.1872	0.0606
6.6	3.582	5.82	5.1		2.85	0.852	2.682	0.3774
5.832	5.994	4.308	7.02		1.26	2.766	0.696	0.702
7.74	9.18	5.892	6.18		0.876	3.984	0.762	0.327
7.8		12.24	6.72		2.376		8.46	0.5556
10.98	3.75	4.014	6.6		3.756	0.1224	1.062	0.3186
5.916	2.382	4.446	6.72		1.254	0.1356	0.66	0.381
5.4	2.34	10.14	3.03		1.77	0.1266	7.44	0.2826
6.72	3.588	3.06	9.48		2.796	0.1902	0.339	0.4716
7.02	2.838	3.312	6.12		1.542	0.744	0.198	0.3858
4.014	4.626	5.238	3.978		0.99	0.4752	1.938	0.3312
4.5	2.658	4.938	6.42		0.471	0.138	1.356	1.296
5.85	1.986	5.316	3.744		1.35	0.05376	2.13	0.5076
7.32	4.65	3.93	5.316		2.484	0.2544	1.71	0.282
8.52	3.858	7.68	6.84		3.324	0.63	4.176	1.572
7.74	8.4	6.78	8.46		2.484	2.514	3.75	0.852
	4.32	7.68	6.6			0.756	0.942	0.978
4.134	4.908	3.042	5.13		0.05886	1.734	0.738	0.684
2.958	7.32	3.612	7.56		0.0828	0.4986	1.206	1.008
5.166	4.518	5.742	8.76		0.1776	0.0828	2.43	2.61
6.42	4.272	6.24	7.74		0.726	0.3078	2.25	0.612
8.1	5.79	4.158	7.14		0.816	1.194	0.75	1.62
3.576	5.358	4.446	3.48		0.3126	0.606	1.824	0.5862
2.73	5.388	3.024	5.178		0.762	0.4128	0.78	0.462
5.214	4.662	4.764	6.36		1.26	0.714	1.77	0.5442
10.26	4.362	6.78	5.592		4.23	0.2208	1.218	1.158
5.352	4.8	6.78	6.6		0.5154	0.078	3.156	4.716
6	4.11	3.318	5.844		1.974	0.465	1.05	0.378
7.38	3.756	7.02	3.96		0.828	0.279	1.092	0.1842
4.032	3.234	4.866	9.24		0.5442	0.246	0.918	4.746
5.298	4.128	6.6	5.856		0.9	0.4188	1.278	1.782
3.234	5.064	5.25	10.92		0.948	0.5358	0.5526	2.058
9.3	4.128	5.316	8.1		1.818	0.972	4.488	0.804
4.512	7.14	12.78	6.36		0.2652	0.93	9.84	0.2148
7.68	3.936	5.07	4.854		1.032	0.0654	1.62	1.572
7.08	5.574	4.98	6.06		3.15	3.072	2.544	0.411
5.538	4.068	3.162	4.224		1.53	0.774	0.4848	0.2556
4.326	4.92	3.714	8.16		1.242	1.116	0.66	3.114
8.76	5.196	10.56	7.08		1.158	1.488	7.26	0.672
8.28	3.306	5.664	3.978		1.314	0.684	1.056	0.0948
8.76	2.244	2.844	6.3		0.768	0.099	0.3624	0.1614
5.526	1.926	4.806	10.86		1.458	0.123	2.346	1.248
8.7	3.42	7.8	9.24		1.29	1.626	3.024	3.798
5.964	5.148	5.778	4.602		0.708	0.756	1.89	0.2238
7.92	4.068	7.2	6.12		1.26	0.912	5.172	0.3336
4.578	2.97	5.142	5.766		1.14	0.3654	0.4632	0.5232
9.3	4.218	10.08	8.04		0.648	0.4272	8.04	2.526
7.56	3.948	5.85	9.78		2.214	0.3486	2.7	5.364
8.4	5.868	3.384	5.16		4.482	0.3366	0.84	0.3378
5.922	4.464	7.5	10.74		0.162	0.588	2.226	3.576
2.238	6.6	4.392	4.68		0.1932	0.18	0.864	0.2412
7.38	3	6.96	6.78		1.41	0.321	2.838	1.224
8.4	3.222	8.22	7.62		3.312	0.804	4.062	0.774
5.106	7.44	3.06	4.86		0.996	0.846	0.5532	1.878
5.19	3.816	5.142	4.344		0.2988	0.3048	1.764	0.2214
9.84	2.808	3.474	6.9		1.992	0.555	0.702	3.564
6.6	3.18	7.86	7.44		0.666	0.132	1.326	3.084
9.9	2.856	7.92	3.864		1.968	0.1626	3.768	0.1524
1.812	2.544	4.41	6.9		0.1314	0.4632	0.597	0.3816
7.2	2.646	7.08	5.46		1.014	0.1644	1.878	0.4638
7.92	4.284	4.116	8.28		0.642	0.2724	1.296	0.618
3.63	2.73	5.682	8.4		0.138	0.246	0.534	3.78
5.49	6.54	3.504	10.08		0.45	0.4896	0.3144	2.826
11.4	3.378	7.02	6.96		3.342	0.2226	2.904	0.564
6.9	5.718	4.002	5.064		1.302	0.834	1.89	0.2934
5.718	4.944	2.322	5.466		1.032	0.834	0.51	0.912
11.52	4.038	5.52	4.602		4.896	0.678	3.252	1.104
6.18	3.24	5.046	8.88		2.16	0.3084	2.712	0.4218
6.24	3.306	7.5	6.66		1.23	0.5454	2.49	0.4854
6.18	4.278	4.206	7.74		0.762	0.654	1.476	0.906
6.54	5.802	2.178	6.18		3.582	0.996	0.702	0.5808
8.1	3.054	8.28	4.5		0.63	0.84	2.4	0.996
6.9	3.696	6.54	8.16		0.4266	0.399	0.93	5.754
6.06	3	4.722	5.28		0.774	0.252	2.58	0.3744
5.748	5.13	3.366	6.12		1.518	0.477	0.5412	0.3246
7.32	1.944	3.756	8.58		0.816	0.3744	0.69	4.11
5.886	3.606	9.42	6.72		2.112	0.714	5.136	2.292
6.66	3.084	7.02	5.058		5.31	0.294	1.302	0.714
9.6	4.434	3.792	6.18		0.3354	0.2076	1.632	0.5232
4.98	3.606	5.04	12.72		0.2784	0.4116	1.452	0.672
6.42	3.492	3.786	8.28		3.294	0.3306	1.026	0.606
6.72	3.216	5.754	8.52		0.66	0.612	3.798	3.024
8.46	2.52	10.02	9.78		0.822	0.72	6	2.448
4.05	6.3	8.34	5.292		0.846	1.878	7.02	0.5688
9.78		3.438	5.142		3.432		0.87	0.147
6.12	4.536	7.38	5.094		0.4008	0.0834	4.41	0.2664
7.14	4.776		7.32		2.16	0.1368		0.984
6.96	5.928	5.322	9.12		2.748	0.672	1.338	1.158
5.19	5.718	6.42	10.26		0.3312	2.112	2.202	2.106
2.742	4.524	10.68	21.6		0.1206	0.5592	4.17	1.104
4.824	5.1	7.98	4.536		0.72	2.286	4.44	0.123
11.1	5.988	5.658	5.802		3.414	0.3678	0.5724	0.5166
7.08	4.152	3.906	6.3		0.48	0.1572	2.166	0.612
9.72	6.42	7.44	4.488		0.3954	0.528	4.062	0.87
5.94	10.38	4.38	3.456		1.572	1.116	0.834	0.1506
8.7	5.13	8.82	4.44		0.4818	0.3372	2.778	0.636
5.892	9.36	6.12	7.56		1.956	1.152	2.898	0.744
7.26	5.226	4.848	5.778		1.596	0.3276	1.356	0.2058
10.08	4.62	12	7.68		0.5532	0.3618	4.62	0.2352
5.814	4.38	6.6	3.594		0.5976	1.098	1.788	0.2496
8.4	6	4.578	5.394		4.722	0.3888	1.38	0.3192
6.66	7.44	3.474	8.46		1.5	0.888	1.362	0.3288
6.48	5.946	11.46	7.62		0.648	0.2286	2.058	0.852
6.36	5.346	5.862			0.3306	1.416	0.936
7.44	5.178	10.44	4.332		0.165	0.852	3.42	0.2886
6.06	8.52	4.674	5.046		3.114	1.206	1.212	0.084
6.18	4.374	8.94	5.58		0.05322	0.1746	3.912	1.476
6.72	7.68	3.882	7.14		1.278	0.2862	0.3144	0.1614
4.608	3.888	6.66	3.618		0.1962	0.04908	1.62	0.4608
4.986	5.4	7.02	6.42		0.3138	0.618	2.532	1.224
6.78	5.538	10.86	6.12		2.49	0.894	3.06	0.5436
5.346	5.724	7.74	8.28		1.59	0.1188	2.016	3.036
10.98	5.304	2.976	11.46		5.184	1.134	1.656	1.002
5.856	4.182	7.14	3.456		0.762	1.428	1.908	0.714
5.19	5.232	9.78	6.84		0.5034	0.612	4.134	2.916
6.06	5.478	9.72	7.32		2.364	0.3594	4.65	2.736
7.38	6.6	7.14	5.922		0.762	1.308	0.822	0.756
11.64	6.12	7.98	5.892		7.14	1.164	1.116	0.5682
7.86	4.98	5.874	8.52		1.692	0.2226	1.368	0.66
3.942	5.7	5.19	7.86		1.686	1.122	1.128	3.732
6.84	4.314	7.56	5.976		0.5568	0.2016	1.338	1.002
6.24	5.022	8.76	5.394		2.466	0.84	0.654	0.2478
7.02	5.202	9.48	6.96		4.224	0.357	3.3	1.572
11.82	5.484	5.076	4.344		8.7	1.176	1.2	0.99
6.78	3.282	8.58	6.72		0.2682	0.1146	3.84	1.65
5.28	4.806	7.2	5.808		0.3426	1.506	1.53	2.016
4.968	5.826	6.48	3.936		1.776	0.726	4.728	0.1704
	6.54	6.78	3.396			3.312	1.872	0.654
5.46	6.12	5.076	4.764		0.4278	0.84	2.4	0.1248
6.12	5.388	6.48	6.78		0.33	0.732	2.688	1.596
3.174	4.932	8.82	8.28		0.0858	0.3198	1.374	1.872
6.6	4.698	7.38	10.2		0.3348	1.038	3.21	0.522
7.26	4.236	6.3	8.1		1.002	0.636	3.168	0.942
4.224	3.18	3.444	5.574		0.1638	0.2718	0.72	0.66
8.46	4.422	5.712	9.48		0.5982	1.41	1.086	2.472
5.748	4.728	6.9	5.79		1.224	0.5376	2.454	0.495
4.686	6.54	6.18	6.66		0.4158	0.852	3.228	0.816
7.02	7.32	3.78	4.074		0.678	1.38	1.326	1.086
5.886		7.56	7.08		0.1158		4.02	3.678
4.866	3.894	6.36	4.98		0.4902	0.2556	0.1572	0.447
5.274	5.316	13.32	7.92		0.522	0.708	3.996	1.782
5.496	5.388	5.112	4.122		0.306	0.1632	0.936	0.105
5.316	6.9	10.98	7.38		0.984	0.642	3.996	0.48
3.564	6.06	6	6.54		0.3744	0.726	2.142	0.1068
10.8	9.12	5.748	4.476		2.232	0.5988	2.13	0.666
12.96	10.2	5.226	10.02		1.602	0.5976	2.76	0.756
8.4	4.224	8.1	5.226		3	1.356	2.586	0.1326
8.04	5.958	6.06	4.404		1.074	3.294	2.13	1.17
8.16	5.838	5.7	6.48		0.5394	0.918	4.416	1.878
6.42	9.06	4.986	5.7		0.3336	0.936	2.814	4.38
8.7	6.36	4.914	6.18		0.3234	1.308	1.656	1.098
9.72	4.896	5.826	7.68		2.754	0.708	1.302	1.512
7.86	3.924	7.44	9.72		0.966	1.068	0.864	0.3708
10.68	5.652	5.106	8.1		0.9	1.062	1.848	3.972
5.232	6.84	4.404	6.12		0.606	1.302	2.946	0.786
7.68	6.42	2.448	9.24		0.5688	0.87	0.4884	2.934
8.52	4.512	3.486	6.48		1.32	0.1716	1.11	0.894
9.06	6.6	3.384	9.6		1.176	1.176	1.398	3.084
9.24	7.44	6.3	7.86		0.5046	1.038	4.272	0.477
5.112	6.9	3.936	11.58		0.33	1.296	0.3696	2.616
7.44	8.52	5.124	6.24		0.786	2.31	3.804	0.618
5.376	4.17	6.3	6.84		0.1938	0.3042	2.118	0.876
10.68	4.464	4.194	8.04		1.86	0.3984	0.4236	2.7
9.12	5.388	6	6.36		0.84	0.1602	1.578	0.63
8.28	8.1	6.3	7.62		1.398	2.76	0.912	1.458
5.748	6.72	7.74	6.78		1.02	0.972	1.806	1.044
6.3	6.3	9.12	6.84		0.936	0.225	4.23	1.146
6.66	6.96	9.6	6.06		0.1116	2.286	4.23	1.542
7.92	6.18	4.98	6.6		3.39	0.816	1.974	0.333
10.56	6.3	6.42	5.544		0.99	1.932	2.742	0.3
8.46	5.034	6.12	9.48		1.956	0.858	3.948	0.9
5.88	6.3	8.04	6.6		0.798	0.774	2.562	1.236
7.74	5.916	4.848	4.536		2.346	0.2886	1.992	1.086
5.952	5.076	3.942	3.642		0.4656	0.03048	1.332	1.158
6.72	6.06	4.362	7.26		0.636	1.782	0.936	1.11
8.04	6.78	6.84	5.64		3.696	2.298	3.162	2.7
8.1	7.02	6.84	4.338		0.4662	0.4596	1.014	0.786
11.52	4.098	2.484	4.95		2.1	1.134	1.284	0.5244
10.38	5.478	8.76	7.68		7.38	0.9	6.96	5.112
8.88	6.06	4.326	7.26		1.458	0.2574	0.2994	0.9
6.9	5.982	10.44	4.848		0.5472	0.612	3.972	0.708
7.68	8.7	7.86	4.452		4.878	0.5208	1.026	0.84
7.14	7.8	5.658	8.4		1.878	4.992	1.128	1.77
6.18	9.66	6.06	5.262		2.016	1.68	1.632	0.4854
9.78	7.56	7.5	5.748		1.17	0.492	3.678	1.698
6.9	5.784	4.548	7.02		2.184	0.4308	2.202	2.094
10.8	5.412	5.646	5.196		7.32	0.2994	0.2706	0.816
8.1	7.98	5.514	6.6		1.896	0.738	2.238	0.72
7.5	4.308	5.616	5.646		0.4398	0.3564	2.19	1.752
4.518	7.74	5.802	7.2		0.5184	3.162	1.812	0.996
6.9	8.28	6	3.036		0.918	0.102	2.418	0.624
5.742	6.3	11.1	9.3		1.734	0.786	1.896	4.938
7.26	4.758	7.32	6.3		3.99	0.1806	2.214	0.996
10.74	10.74	7.14	5.598		4.362	0.1116	1.86	2.076
7.92	5.544	5.718	8.1		2.196	0.4296	0.4272	2.694
6.6	3.762	5.352	4.806		1.29	0.4614	3.936	0.5952
4.566	7.32	5.85	6		0.2172	3.528	3.318	2.832
10.86	5.472	3.15	3.594		1.122	0.81	0.5292	1.944
7.92	5.814	5.556	3.648		1.518	1.782	2.298	1.506
6.84	8.7	5.802	8.88		0.666	1.014	0.96	5.514
4.704	5.112	5.208	4.728		1.59	0.1788	1.416	0.3606
9.06	5.334	4.656	3.768		2.79	0.3828	1.458	0.696
11.88	3.636	4.236	8.28		0.774	0.828	1.08	3.816
10.2	8.16	11.64	8.1		5.022	1.194	0.3612	0.5478
3.918	6.96	5.682	5.718		0.3918	2.01	1.056	3.246
7.8	3.63	2.982	3.51		1.938	1.356	1.434	0.1824
9.66	8.76	4.542	4.452		0.618	2.796	1.29	0.912
9.36	4.26	7.98	6.66		2.316	0.336	1.086	1.074
7.98	6.12	5.682	8.94		3.678	0.912	4.704	4.272
12.84	4.254	5.472	9.06		2.772	0.978	2.478	2.286
5.13	7.08	7.86	7.8		0.369	0.87	3.012	1.734
7.74	8.64	8.58	4.05		1.536	0.4692	2.268	1.71
9.96	5.784	3.762	8.16		2.004	1.572	0.654	3.948
9.18	7.44	6	8.52		0.3978	1.014	1.386	1.002
6.18	5.892	11.94	4.2		1.314	0.507	1.812	0.0876
12.18	5.334	6.24	8.04		1.17	0.984	4.32	1.434
6.48	6.06	6.66	4.278		0.888	0.888	2.82	0.3288
9.48	10.08	5.154	5.226		0.5856	1.584	2.172	0.4596
8.46	5.16	5.454	5.418		0.606	0.762	1.068	0.02388
10.92	5.028	10.5	5.94		1.152	1.056	0.3948	0.5478
8.64	7.08	7.62	5.598		4.458	1.398	1.608	0.996
6.84	6.66	6.48	4.722		2.226	1.566	0.4794	0.708
	7.26	6.24	6.66			1.458	3.636	0.666
	9.72	7.86	5.46			3.036	4.152	2.166
	9.66	7.68	5.976			4.434	1.53	0.63
	6.84	7.44	7.92			1.59	1.722	0.321
	5.73	2.316	4.836			1.782	0.666	1.134
	10.08	2.058	4.98			0.804	0.72	1.41
	7.2	3.684	7.86			2.064	0.4986	0.3306
	4.602	6.36	10.38			2.142	2.988	0.618
	9	4.566	4.176			1.386	0.672	0.6
		6.12	6.9				2.46	0.972
		5.562	6.18				2.958	0.162
		6.06	7.92				2.958	3.084
		4.836	4.53				1.422	0.03762
		9.3	6.12				2.016	0.684
		5.082	5.388				1.5	1.092
		5.646	6.48				2.226	0.882
		5.574	7.62				0.5166	1.914
		4.548	8.76				1.08	3.33
		5.232	4.662				3.174	0.3624
		11.28	7.68				2.19	1.614
		4.662	5.274				1.998	2.172
		6.18	3.738				0.888	0.3546
		6.84	5.136				3.984	0.453
		5.724	6.12				2.976	1.578
		4.038	4.11				1.158	1.584
		6.12	4.428				3.246	1.248
		3.648	8.28				1.11	4.278
		3.6	4.758				0.816	0.3846
		7.2	5.322				1.452	1.242
		5.748	5.196				1.458	0.714
		8.04	5.532				3.384	2.448
		5.214	6.78				0.438	2.832
		7.92	5.556				1.362	0.618
		8.88	7.92				3.168	4.674
		4.386	6.18				1.8	0.9
		4.95	5.922				0.876	0.642
		6.78	9				1.848	4.824
		7.38	4.266				1.272	0.3114
		6.66	9.54				3.162	3.876
		5.1	5.37				1.356	1.752
		4.062	7.86				2.262	2.064
		4.674	7.32				2.208	1.71
		5.226	6.54				1.98	0.4476
		6.18	8.4				1.236	3.894
		5.976	4.914				1.608	1.644
		3.456	7.2				1.398	1.884
		6	6				4.002	0.624
		10.02	6.18				3.6	0.4038
		4.752	6.66				2.94	1.746
		6.6	5.502				0.648	0.3534
		6.12	6.06				1.974	1.812
		4.152	7.14				0.0948	1.722
		6.36	7.26				3.552	0.4032
		7.02	9.3				1.812	1.608
		6.96	4.818				1.002	0.912
		6.6	3.174				3.102	0.5514
		2.238	8.22				0.351	3.84
		6.06	6.24				0.3876	1.02
		4.332	3.492				2.04	0.3798
		9.3	6.36				2.652	3.678
		6.3	6.06				2.55	0.2808
		7.08	3.948				2.508	0.312
		4.65	6.06				1.632	1.362
		5.202	5.562				1.83	0.756
		6.54	5.586				1.872	0.462
		6.48	5.298				0.696	0.738
		7.08	6.36				3.678	0.654
		4.11	6.12				1.2	2.214
		2.712	6.36				0.762	1.446
		3.462	6.48				0.624	3.156
		11.58	5.004				2.28	1.326
		5.118	6				1.428	0.5844
		3.696	6.36				1.242	0.3606
		6.96	4.392				1.026	0.918
		6.9	5.172				0.5526	0.996
		6.96	5.112				2.268	0.93
		3.93	6.9				1.632	1.878
		3.522	6.18				2.172	2.244
		3.084	6.84				0.2952	1.164
		5.808	4.32				2.568	1.434
		6.12	11.64				0.876	1.026
		5.712	6.78				1.65	0.477
		4.794	4.89				2.562	1.086
		5.454	7.02				3.75	1.14
		6.42	7.32				2.13	1.164
		5.088	6.6				1.182	1.458
		7.2	6.84				1.512	1.392
		6.24	7.68				3.648	2.916
		6.06	5.13				1.404	1.206
		9.12	6.9				4.83	1.26
		5.49	7.44				3.084	3.696
		6.12	4.668				0.858	1.074
		4.518	5.466				0.732	0.9
		4.248	5.01				1.368	1.224
		7.68	6.42				4.296	0.726
		4.842	4.8				1.152	0.4554
		4.938	4.17				2.01	1.176
		4.746	4.524				2.034	1.452
		8.58	8.1				2.622	2.25
		7.38					4.206
		4.794	5.718				0.906
		6.48	8.04				2.664	0.12
		5.472	8.94				2.502	0.18
		7.38	11.4				3.906	1.188
		5.736	7.5				1.716	1.494
		9.6	6.18				3.018	1.278
		5.394	9.6				0.606	0.804
		7.5	7.62				0.5028	5.694
		4.836	11.82				0.69	0.324
		5.976	8.82				4.524	1.302
		4.38	5.964				0.2478	0.1536
		8.1	6.42				4.062	0.834
		7.26	10.38				1.2	1.95
		7.14	7.74				1.188	1.518
		7.32	12.96				4.284	0.5778
		5.364	6.84				3.018	2.676
		9.66	9.54				1.134	1.254
		7.08	8.04				3.066	1.704
		9.18	6.48				5.316	0.714
		5.286	12				0.4164	1.722
		6.6	13.92				0.3672	0.3108
		5.424	15				2.598	4.56
		5.142	12				0.906	2.286
		5.544	9.24				0.5376	2.118
		5.868	8.34				0.996	0.561
		5.718	10.86				1.134	1.392
		6.84	11.82				3.438	0.918
		5.658	9.36				1.458	1.284
		5.364	5.79				0.5184	0.756
		5.892	13.68				0.4506	0.846
		8.28	8.64				2.412	0.846
		6.18	12.54				2.082	4.524
		5.028	6.84				2.07	1.458
		7.68	5.394				2.04	0.822
		7.14	8.34				0.816	0.66
		4.194	14.28				1.98	2.742
		6.54	5.472				0.918	2.238
		3.252	13.14				0.774	0.3096
		4.998	9.84				0.984	4.62
		5.334	9.12				1.116	1.224
		5.568	8.52				1.068	0.768
		9.06	8.52				2.208	0.876
		3.282	11.4				0.66	3.252
		5.142	9.6				0.2838	4.056
		6.06	9.3				2.628	2.298
		6.36	7.08				1.746	0.9
		7.38	11.94				1.2	0.5718
		9.12	6.84				4.44	0.5754
		6.3	8.22				1.89	0.465
		6.78	7.38				1.644	2.13
		9	9.66				0.72	0.678
		6.78	5.514				0.978	3.054
		6.96	11.16				0.858	0.0966
		6.36	5.286				0.2376	2.01
		6.24	8.64				2.478	0.3024
		6.66	8.82				3.036	2.268
		6.42	11.16				1.416	1.014
		5.364	8.16				2.766	3.93
		5.682	17.1				1.296	0.3924
		6.36	7.8				2.754	8.76
		6.18	8.7				1.344	0.1728
		5.352	8.7				0.2778	2.394
		6.72	8.16				0.3072	0.756
		6	10.14				0.912	1.398
		6	8.34				0.5586	1.2
		6.96	11.88				0.591	3.75
		6.54	5.79				0.612	0.5706
		5.778	11.64				1.026	0.2088
		5.202	13.8				1.722	2.292
		5.502	13.56				0.816	0.177
		5.976	9.3				1.746	2.766
		5.19	9.66				1.308	0.702
		4.008	7.68				0.732	3.594
		4.554	5.802				1.566	0.4368
		5.25	8.04				2.358	0.816
		5.232	9.54				2.148	2.628
		4.764	8.04				2.328	1.974
		6.06	8.52				1.566	3.654
		8.04	9.72				0.894	3.846
		6.24	10.8				0.2766	0.876
		3.654	9.96				0.297	1.908
		4.644	9.9				2.466	0.4542
		4.746	5.31				0.2382	3.12
		5.55	10.44				1.284	0.5112
		6.96	16.62				3.774	3.48
		6.84	9.24				1.248	3.366
		6.12	12.18				0.774	1.776
		3.678	8.76				1.488	0.618
		5.13	12.18				0.774	2.064
		7.44	10.8				2.598	3.192
		5.826	6.12				2.112	1.692
		4.32	15.54				0.828	0.84
		5.382	8.58				1.596	2.796
		5.076	6.78				0.6	0.306
		6.84	12.6				1.236	1.872
		5.604	8.22				1.578	1.08
		3.552	10.74				0.984	0.66
		4.566	9.72				1.122	0.57
		3.258	8.52				0.2148	4.944
		5.832	13.14				2.472	2.076
		6.66	11.94				1.308	0.678
		3.876	12.54				1.368	2.964
		5.478	12.84				2.58	2.598
		5.484					2.466	1.44
		4.068					1.23
		6.72					0.744
		5.382					0.3006
		5.898					1.038
		4.674					1.674
		4.734					1.296
		5.076					1.338
		5.97					0.762
		5.484					0.684
		4.74					1.152
		2.742					0.4422
		4.056					1.32
		5.34					2.016
		5.106					0.726
		4.482					1.302
		5.844					1.194
		5.238					0.453
		5.094					1.242
		3.546					0.1578
		6.48					0.246
		4.47					0.804
		6.12					0.3078
		4.494					0.81
		5.796					2.202
		3.384					0.3702
		3.354					0.1656
		3.936					0.606
		3.144					0.2832
		3.372					0.099
		6.42					0.726
		5.574					0.906
		6.78					0.852
		3.678					0.3816
		5.256					0.618
		6.9					3.258
		6.36					0.4494
		7.5					0.4818
		5.19					0.5568
		4.596					0.456
		9.12					2.118
		8.82					2.244
		7.44					0.624
		7.98					5.184
		7.44					2.478
		8.58					3.342
		11.7					7.92
		8.52					1.266
		8.4					2.34
		4.728					0.5574
		6.54					1.062
		9					2.088
		9.48					3.81
		5.334					2.856
		9.36					2.412
		7.32					5.622
		9.42					5.544
		11.82					3.786
		7.74					2.934
		8.94					7.32
		9.12					3.096
		6.9					4.038
		11.04					2.082
		10.26					3.204
		8.82					0.954
		9.66					6.18
		3.018					0.618
		7.86					2.586
		8.94					1.152
		5.532					2.766
		9.96					2.04
		8.94					1.596
		5.916					0.531
		5.598					1.14
		11.76					4.848
		8.16					0.5586
		7.86					2.226
		8.16					3.06
		6.9					1.422
		7.8					1.494
		10.8					4.206
		7.44					1.644
		9.84					0.5778
		6.06					0.4818
		6.06					0.924
		8.04					0.888
		7.62					0.672
		12.24					3.732
		7.68					0.708
		5.13					1.422
		6.36					0.2856
		5.616					1.842
		8.1					2.01
		9.18					2.1
		6.12					1.68
		8.28					1.926
		9.78					1.986
		5.886					2.196
		8.4					1.422
		6.12					1.29
		14.16					1.488
		7.26					1.632
		10.32					3.222
		9.54					3.246
		5.52					1.584
		7.26					3.384
		7.32					3.696
		11.34					0.624
		8.28					1.614
		6.36					0.2274
		6.36					1.722
		11.22					1.62
		6.84					1.746
		10.08					3.636
		5.448					3.012
		9.9					2.538
		7.5					3.966
		6.9					0.51
		9					2.316
		8.76					3.066
		4.344					0.348
		10.14					2.706
		7.56					0.642
		10.14					2.286
		11.64					3.198
		12.6					6.06
		10.26					2.046
		9.54					5.868
		8.52					1.116
		7.86					2.016
		7.38					2.526
		7.74					2.214
		5.274					1.89
		10.44					4.302
		8.76					2.028
		6.12					1.608
		4.698					0.5118
		7.44					5.316
		6.84					3.774
		4.482					0.1338
		3.75					1.524
		9.84					2.73
		6.96					3.192
		8.7					1.29
		8.4					2.544
		10.2					3.528
		7.98					4.146
		12.84					1.632
		8.28					1.758
		4.842					0.63
		7.32					2.694
		8.64					1.632
		9.9					6.06
		5.904					1.956
		6.9					2.604
		8.22					1.554
		5.034					2.778
		7.14					1.23
		4.236					0.3672
		6.06					0.2574
		7.92					2.436
		6.9					0.4686
		8.4					2.988
		8.28					4.05
		9.72					4.65
		11.64					5.574
		7.26					2.388
		7.32					0.2838
		7.62					3.48
		7.86					3.666
		4.734					0.828
		9.36					1.716
		4.296					0.3966
		7.8					2.268
		7.74					2.292
		5.838					1.038
		10.38					1.056
		7.14					2.586
		6.42					2.79
		8.04					4.566
		5.748					1.59
		10.08					1.428
		8.1					4.656
		5.37					0.5172
		8.34					0.762
		8.82					2.34
		9.42					3.936
		9.6					2.808
		7.2					6.06
		3.6					0.219
		6.42					3
		8.88					0.666
		7.8					3.708
		7.08					2.586
		11.1					5.172
		6.96					3.432
		2.796					0.99
		7.5					0.1992
		4.764					0.786
		9.6					2.484
		7.14					0.876
		5.796					2.766
		6.6					0.882
		7.62					0.411
		6.36					1.302
		6.48					1.518
		8.52					2.262
		8.7					0.2562
		7.14					1.338
		3.828					1.572
		6.9					0.738
		7.74					3.048
		9.06					1.572
		6.6					0.618
		6.24					1.644
		8.46					1.356
		8.22					1.644
		9.36					2.292
		7.44					1.332
		6.6					0.5706
		5.664					0.3948
		5.298					1.044
		10.02					5.46
		10.14					4.398
		5.97					0.252
		8.58					2.91
		2.988					1.068
		6.6					2.424
		9.24					1.872
		6.54					0.3246
		8.1					1.356
		5.394					1.992
		9.3					4.236
		9.48					1.608
		7.14					3.936
		9.72					2.142
		8.1					3.426
		10.56					2.814
		7.5					4.5
		6.9					4.374
		5.934					3.654
		8.34					1.746
		6.66					1.164
		6.66					0.984
		10.2					7.02
		5.544					0.4026
		8.88					3.414
		7.2					0.75
		4.92					0.984
		11.28					1.812
		7.5					0.834
		7.74					3.342
		7.14					3.756
		10.44					5.964
		5.586					2.34
		8.52					0.678
		5.91					2.454
		10.2					2.802
		8.82					3.774
		6.3					1.626
		4.71					1.314
		7.38					2.97
		5.904					1.2
		6.9					0.5418
		6					0.5826
		9.18					3.054
		6.36					0.501
		7.92					3.21
		11.58					1.59
		8.7					1.818
		6.6					0.666
		4.674					0.2856
		8.04					2.226
		5.436					0.732
		5.784					0.972
		7.62					0.582
		5.58					1.8
		5.682					1.86
		10.38					2.34
		7.02					1.596
		7.26					3.774
		11.64					1.902
		4.77					2.196
		8.82					1.23
		7.5					0.888
		7.14					2.166
		9.72					1.902
		7.26					0.4686
		5.58					1.41
		8.88					4.65
		5.832					0.489
		3.57					1.32
		5.172					0.2796
		7.14					1.092
		8.46					0.618
		8.28					2.166
		6.84					1.356
		13.5					5.28
		4.956					0.2328
		6.84					1.41
		6.96					0.792
		5.994					0.972
		6.54					1.632
		7.14					2.772
		8.16					3.516
		10.14					5.616
		7.92					2.568
		8.64					2.406
		9.96					2.064
		5.184					0.564
		6.9					0.5514
		4.23					0.2052
		5.064					0.2034
		6.36					1.134
		6.9					1.374
		4.176					0.81
		7.74					3.066
		10.08					0.5346
		8.34					0.483
		7.08					0.5862
		5.154					0.4428
		7.14					0.5904
		7.38					3.78
		6.6					1.89
		7.62					1.764
		6.18					0.3582
		8.1					4.83
		9.12					5.502
		9.06					6.96
		6.9					1.092
		7.38					3.654
		6.06					0.36
		8.28					2.484
		7.98					5.376
		7.5					2.358
		6.78					1.038
		10.68					5.286
		8.94					1.566
		7.5					2.634
		9.96					3.972
		9.18					3.438
		7.32					1.176
		7.8					2.586
		9.9					1.992
		8.22					3.84
		10.56					0.816
		5.25					0.798
		5.838					1.11
		8.1					1.782
		8.16					1.134
		7.98					2.34
		5.928					0.366
		8.58					2.058
		9.48					0.4002
		6.54					0.87
		4.194					0.63
		7.44					2.01
		8.82					1.092
		9.48					4.776
		9.42					3.792
		7.26					4.86
		7.32					0.942
		8.22					1.254
		9.9					5.016
		9.78					5.484
		7.74					0.4968
		7.68					0.684
		6.66					2.58
		9.06					7.32
		6.48					2.136
		7.68					1.734
		8.28					0.666
		5.472					2.724
		6.72					0.606
		8.28					5.868
		7.68					3.132
		6.96					0.2844
		10.38					5.022
		8.22					0.9
		7.98					5.334
		11.64					4.56
		11.76					5.52
		7.44					1.878
		5.37					1.188
		11.22					0.714
		9					0.906
		6.18					3.45
		6.9					1.02
		9.06					5.712
		8.04					1.962
		10.44					3.03
		7.38					3.162
		5.31					1.2
		3.39					0.606
		9.06					0.2088
		10.8					4.452
		7.86					2.256
		8.64					4.254
		4.044					1.116
		5.652					0.4908
		9.6					4.434
		4.938					2.106
		7.8					1.512
		5.604					1.032
		5.004					0.78
		10.8					4.884
		6.48					0.738
		3.57					0.4572
		5.61					0.5964
		6.54					2.004
		8.1					2.67
		5.724					1.824
		6.06					3.3
		10.08					2.07
		6.36					0.2592
		10.5					2.094
		6.12					0.93
		9.42					1.404
		7.44					2.37
		5.532					0.864
		5.04					2.832
		6.42					3.522
		5.622					1.182
		7.86					1.596
		6.36					0.918
		5.94					0.3348
		6.06					2.1
		6.66					0.63
		5.988					2.13
		10.08					3.36
		8.94					1.548
		6					2.262
		6.9					1.368
		9.96					2.364
		6.6					1.374
		13.32					5.13
		9.66					1.548
		9.24					2.814
		4.23					0.72
		8.7					3.756
		6.66					1.752
		7.8					2.904
		7.14					3.402
		8.64					3.168
		12.84					9.24
		4.584					3.294
		5.118					1.104
		5.838					0.3744
		5.988					2.226
		11.52					3.228
		9					4.926
		8.52					0.936
		7.32					0.5232
		8.46					2.574
		5.01					0.4896
		9.36					2.448
		9					1.362
		8.34					1.242
		6.96					0.2154
		5.526					1.056
		9.72					2.712
		7.44					2.25
		5.754					0.828
		5.322					0.6
		11.58					0.996
		10.44					1.308
		3.72					0.5538
		3.192					0.2562
		4.47					0.3258
		9.06					2.328
		9.72					3.198
		4.29					0.738
		7.14					0.2796
		4.14					1.47
		8.22					3.882
		6.18					0.612
		11.1					2.298
		11.04					5.562
		7.92					2.766
		6.42					0.4002
		3.288					0.4806
		7.74					3.384
		7.14					2.634
		9.06					2.988
		8.1					1.956
		7.08					3.198
		6.66					0.5964
		9.12					4.284
		10.8					4.674
		6.18					0.5208
		9					5.88
		6.54					1.686
		8.46					0.84
		9.12					3.894
		10.14					1.338
		5.268					0.708
		6.66					0.996
		9.96					4.128
		8.34					6.24
		6.18					1.188
		4.878					1.65
		10.98					2.4
		9.42					4.698
		11.52					5.394
		5.022					1.734
		7.44					1.296
		5.916					0.714
		4.884					0.582
		7.08					1.02
		9					2.154
		6.6					2.094
		6.66					3.108
		10.02					2.598
		6.6					2.43
		9.36					4.416
		9.96					2.52
		7.92					0.4836
		5.694					1.584
		5.964					1.95
		8.1					3.75
		7.02					4.32
		13.14					4.446
		4.818					1.326
		10.02					2.34
		5.682					1.764
		7.68					2.928
		6.96					3.876
		6.06					1.716
		4.41					0.2586
		6.18					1.908
		6.9					1.86
		6.06					1.938
		9.48					3.834
		6.84					1.026
		11.82					2.37
		9.72					3.042
		5.088					2.538
		6.06					1.038
		8.64					2.568
		4.83					2.34
		7.08					2.058
		7.98					4.032
		10.74					2.88
		5.712					2.262
		8.1					3.816
		11.34					1.464
		6.54					3.6
		5.172					1.884
		8.94					4.29
		13.68					4.806
		4.92					1.986
		4.356					0.576
		6.78					3.108
		10.02					5.664
		12.18					3.948
		8.4					3.108
		9.54					3.138
		7.08					0.864
		5.862					3.816
		5.67					1.254
		4.962					0.702
		9.06					5.172
		5.82					1.224
		5.832					2.52
		4.458					0.642
		5.79					2.604
		8.22					0.978
		7.38					3.438
		7.38					1.704
		9.36					5.976
		6.6					3.3
		8.1					2.262
		5.142					1.494
		6.24					1.878
		8.52					2.742
		5.25					1.812
		5.19					0.666
		7.26					0.3138
		10.8					5.97
		7.08					2.28
		4.026					1.302
		5.04					1.812
		5.334					1.314
		5.946					1.344
		9.06					2.418
		10.14					6.24
		5.568					0.72
		6.66					0.4404
		4.248					0.714
		7.62					3.522
		6.84					2.52
		10.26					2.346
		4.326					0.738
		4.566					0.3216
		4.824					1.242
		7.5					3.45
		7.74					1.404
		9					6.78
		5.088					1.95
		5.136					1.722
		11.04					2.52
		7.08					4.2
		6.72					0.282
		8.64					3.108
		5.016					0.2472
		7.56					4.356
		6.54					0.888
		5.688					2.742
		9.06					2.616
		8.46					3.048
		5.766					3.324
		7.86					3.072
		3.444					0.786
		5.322					0.1866
		7.62					4.236
		10.98					4.314
		8.28					1.752
		9.18					1.02
		5.886					1.734
		9					2.724
		4.248					0.828
		4.614					0.846
		6.54					0.942
		5.898					3.384
		4.95					0.678
		11.04					6.3
		9.12					1.32
		4.872					1.41
		11.7					2.472
		6.96					0.756
		4.23					0.129
		6.96					2.73
		8.94					2.184
		7.86					1.65
		5.262					1.962
		10.32					4.938
		6.24					4.008
		4.836					0.4644
		6.12					1.932
		4.662					0.519
		4.974					3.21
		6.3					1.722
		7.5					2.688
		6.96					0.201
		7.02					2.574
		7.62					0.864
		8.88					2.856
		7.74					3.486
		6.36					3.762
		3.948					0.648
		8.76					2.154
		6.96					4.236
		9					2.124
		6.78					2.844
		8.22					1.242
		5.292					2.574
		13.92					5.646
		6.3					3.762
		6.66					0.5622
		6.9					4.302
		6.6					2.532
		8.7					4.212
		6.84					1.41
		6.42					2.274
		11.76					2.64
		7.26					3.96
		8.28					1.686
		7.26					3.846
		7.26					1.446
		8.22					1.962
		3.102					0.5172
		6.48					5.184
		10.62					4.512
		4.644					0.732
		8.88					3.402
		9.36					2.58
		7.08					2.292
		7.8					2.592
		8.1					4.824
		7.14					1.5
		5.88					2.142
		9.48					2.97
		7.62					4.836
		4.83					1.926
		8.22					3.522
		9.24					4.164
		7.44					0.954
		5.766					3.324
		4.848					1.074
		5.808					0.531
		10.38					3.702
		9.06					2.694
		4.266					1.086
		5.688					3.498
		5.19					0.69

## Sheet: 3C
All PTCRA-EGFP
pDC Track Velocity Average/Mouse (μm/min)					pDC Dispacement Rate Average/Mouse (μm/min)
WT Naive	WT PyYM	Tlr7-/y naive	Tlr7-/y PyYM		WT Naive	WT PyYM	Tlr7-/y naive	Tlr7-/y PyYM
7.09	1.969	5.334	8.142		1.77	0.3147	1.834	2.084
6.677	5.844	6.054	6.717		1.499	0.8948	1.833	1.172
7.712	4.942	7.639	6.309		1.474	0.7749	2.21	1.399
	5.574	7.053	9.594			1.625	2.357	1.724
	4.14					0.5841
	5.527					0.7927
	6.485					1.152

## Sheet: 3D
All PTCRA-EGFP
(left panel)																		(right panel)
WT Naïve				WT PyYM				Tlr7-/y naïve				Tlr7-/y PyYM						Slope of MSD
Time (seconds)	Mean	SD	N	Time (seconds)	Mean	SD	N	Time (seconds)	Mean	SD	N	Time (seconds)	Mean	SD	N			WT Naive	WT PyYM	Tlr7-/y naive	Tlr7-/y PyYM
0	0	0	2636	0	0	0	2338	0	0	0	4992	0	0.0014669	0.077552	2795			0.2784	0.2191	0.7725	0.4649
60	28.0585	37.8272	1117	60	13.787	18.6615	476	60	23.3075	29.9216	2985	60	17.3861	26.9011	1650			0.4481	0.05659	0.7074	0.5016
80	31.6234	41.6986	873	80	25.3131	31.5119	1097	80	32.7841	42.0495	2473	80	23.4852	35.5515	922			0.3767	0.1419	0.172	0.2974
120	42.7726	64.1016	610	120	20.2282	27.7316	302	120	52.6873	63.4906	1525	120	32.7614	47.6637	684			0.3754	0.1063	0.4562	0.2673
160	63.0459	106.731	536	160	25.593	36.1664	319	160	78.7718	105.772	1515	160	47.4689	68.4431	743				0.05986
180	73.5535	112.257	507	180	29.8394	42.8256	342	180	92.8105	128.331	1364	180	56.3085	86.8379	629				0.1492
200	77.913	126.587	333	200	28.5572	43.8029	185	200	103.644	129.304	1014	200	68.0865	104.018	416
240	95.926	162.876	286	240	34.5317	47.4991	339	240	131.928	187.284	1304	240	82.6919	126.642	347
260	102.172	176.203	262	260	35.1875	57.1726	137	260	161.364	225.427	955	260	91.5262	142.462	439
280	108.257	186.773	247	280	37.8348	58.0493	241	280	184.233	243.321	1176	280	91.6729	145.707	244
300	113.576	206.943	226	300	36.4924	54.0638	117	300	198.769	287.8	794	300	105.76	164.379	379
320	120.469	223.397	214	320	43.3172	70.1541	242	320	213.714	307.993	743	320	112.941	181.695	255

## Sheet: 3E
Uninfected WT pTCRAGFP -> WT					Infected Py YM, 36 hrs WT pTCRAGFP -> WT					Uninfected Tlr7-/ypTCRAGF -> WT					Infected Py YM, 36 hrs Tlr7-/ypTCRAGF -> WT
Track ID	Centroid X	Centroid Y	Centroid Z		Track ID	Position X	Position Y	Position Z		Track ID	Position X	Position Y	Position Z		Track ID	Centroid X	Centroid Y	Centroid Z
1000000000	285.549	191.782	-81.7892		1000000000	246.212	66.9563	-1009.35		1000000000	6.09883	27.6592	942.134		1000000000	153.929	256.964	1172.55
1000000000	285.106	191.346	-82.3939		1000000000	246.204	65.9419	-1007.86		1000000000	5.76793	28.5462	939.45		1000000000	154.045	256.12	1171.12
1000000000	284.941	192.352	-82.451		1000000000	244.589	63.3554	-1006.38		1000000000	5.93544	28.8547	938.686		1000000000	153.346	257.068	1172.59
1000000000	282.342	193.401	-85.6799		1000000000	244.807	64.1427	-1006.15		1000000000	5.43216	28.4918	938.279		1000000000	153.787	256.779	1172.81
1000000000	281.234	193.507	-86.0307		1000000000	244.394	63.2559	-1009.55		1000000000	5.89092	29.6344	937.942		1000000000	154	256.502	1172.9
1000000000	279.791	194.518	-86.383		1000000000	245.052	63.8485	-1009.54		1000000000	5.6254	30.1543	938.022		1000000000	153.757	256.599	1171.56
1000000000	279.287	193.506	-86.842		1000000000	244.874	63.5977	-1009.34		1000000000	5.99986	29.6361	938.357		1000000000	153.657	256.372	1171.16
1000000000	278.364	193.825	-86.9147		1000000000	244.916	64.7964	-1009.56		1000000000	6.31101	29.6808	937.377		1000000000	153.431	256.99	1170.53
1000000000	276.723	194.293	-86.6853		1000000000	244.581	63.8345	-1009.4		1000000000	6.35014	29.6618	936.775		1000000000	153.382	256.162	1172.33
1000000000	275.957	194.542	-87.1938		1000000000	245.34	64.9903	-1009.65		1000000000	6.38963	30.8081	942.58		1000000000	153.93	255.926	1171.48
1000000000	276.694	194.546	-90.7269		1000000000	246.137	65.2143	-1009.39		1000000000	6.19917	30.9744	942.82		1000000000	153.061	257.463	1172.07
1000000000	276.198	194.973	-87.8816		1000000000	245.731	65.9849	-1009.27		1000000000	6.16814	31.4663	943.247		1000000000	152.368	258.905	1170.99
1000000000	277.571	196.108	-90.9948		1000000000	245.595	66.0184	-1009.27		1000000000	6.638	30.7236	943.611		1000000000	151.279	260.137	1170.29
1000000000	276.976	195.135	-86.6476		1000000000	245.639	65.5158	-1009.23		1000000000	7.11338	31.6686	944.086		1000000000	149.091	262.4	1171.83
1000000000	276.843	194.645	-85.2064		1000000000	246.564	65.99	-1009.25		1000000000	6.62201	31.1934	944.132		1000000000	149.917	262.609	1172.39
1000000000	277.037	195.205	-86.5919		1000000000	246.288	65.3852	-1009.22		1000000000	7.5246	32.1802	943.668		1000000000	150.738	261.69	1171.55
1000000000	277.11	195.168	-86.2741		1000000000	246.571	66.0435	-1009.18		1000000000	7.16209	32.6788	944.526		1000000000	149.671	262.533	1172.94
1000000000	277.572	196.735	-85.3478		1000000000	246.582	65.8644	-1009.23		1000000000	5.59176	32.7371	945.522		1000000000	149.887	262.126	1171.51
1000000000	276.24	196.31	-90.6578		1000000000	246.341	66.7353	-1009.27		1000000000	4.72595	32.9891	945.941		1000000000	150.357	262.485	1171.46
1000000000	275.367	198.047	-87.7284		1000000000	247.783	67.3268	-1009.36		1000000000	4.3154	33.9623	944.055		1000000000	149.7	263.398	1171.73
1000000000	276.061	198.16	-87.4372		1000000000	246.652	68.6916	-1009.31		1000000000	6.29616	33.6124	944.399		1000000000	150.824	262.178	1172.29
1000000000	276.438	196.841	-88.501		1000000000	247.151	67.5697	-1009.3		1000000000	7.48386	32.9191	949.099		1000000000	151.468	261.812	1171.7
1000000000	276.634	197.517	-87.2014		1000000000	247.46	67.7547	-1011.92		1000000000	9.92652	35.4988	950.659		1000000000	148.913	263.201	1172.67
1000000000	276.09	197.816	-87.4249		1000000000	247.305	69.4533	-1010.09		1000000000	10.0543	38.2572	951.636		1000000000	148.924	263.143	1174.26
1000000000	275.429	197.17	-86.898		1000000000	248.224	69.1029	-1008.59		1000000000	9.90143	38.3894	951.886		1000000000	148.821	262.965	1175.55
1000000000	275.907	197.538	-86.9035		1000000000	248.162	70.4268	-1008.73		1000000000	12.7527	40.6566	951.159		1000000000	149.008	263.962	1172.06
1000000000	275.231	197.632	-86.9734		1000000000	248.022	70.7196	-1008.04		1000000001	116.567	52.672	927.335		1000000000	150.536	262.865	1173.81
1000000000	275.095	197.424	-86.9722		1000000000	248.843	70.5996	-1010.09		1000000001	117.23	53.5153	924.524		1000000000	149.405	262.672	1175.82
1000000000	276.153	197.145	-86.5289		1000000000	248.143	71.2997	-1010.06		1000000001	116.86	54.3287	924.53		1000000000	149.48	263.289	1175.85
1000000000	276.077	197.103	-87.2553		1000000000	248.618	71.615	-1009.32		1000000001	117.474	54.3631	922.802		1000000000	150.185	261.967	1175.85
1000000000	276.979	196.746	-86.6775		1000000000	248.548	72.1778	-1009.24		1000000001	117.742	54.5462	924.185		1000000000	149.825	263.711	1171.65
1000000000	277.016	196.533	-86.5773		1000000000	248.766	71.9902	-1012.73		1000000001	117.314	54.9548	924.081		1000000000	150.395	263.533	1172.68
1000000000	277.541	196.144	-86.4606		1000000000	247.953	70.9048	-1012.77		1000000001	117.436	54.1636	923.132		1000000000	150.599	263.621	1172.65
1000000000	275.947	197.318	-87.9687		1000000000	247.297	72.431	-1009.23		1000000001	117.406	54.3118	924.209		1000000000	150.028	263.816	1172.77
1000000000	270.986	198.325	-81.992		1000000000	246.088	73.3122	-1010.19		1000000001	118.089	54.5124	923.625		1000000000	150.845	262.542	1172.18
1000000000	270.656	198.28	-80.717		1000000000	248.014	72.2809	-1011.94		1000000001	117.847	55.0724	928.712		1000000000	150.68	263.018	1171.51
1000000000	270.354	199.171	-81.5133		1000000000	246.345	72.3269	-1009.59		1000000001	118.054	54.8736	927.989		1000000000	150.324	263.768	1171.6
1000000000	269.868	199.571	-81.2534		1000000000	245.937	72.2688	-1009.19		1000000001	117.521	55.3104	928.162		1000000000	149.838	264.683	1175.12
1000000000	270.401	198.357	-80.8246		1000000000	247.219	70.8224	-1013.11		1000000001	118.369	56.5155	928.357		1000000000	149.837	263.523	1175.94
1000000000	270.546	198.458	-81.5586		1000000001	59.7627	206.158	-1023.27		1000000001	118.517	54.9858	928.826		1000000000	149.335	263.461	1173.52
1000000000	268.7	198.658	-82.9536		1000000001	59.7958	206.024	-1022.17		1000000001	117.827	55.679	928.151		1000000000	150.106	263.156	1172.37
1000000000	269.19	198.811	-83.6929		1000000001	59.745	208.531	-1021.11		1000000001	117.696	56.4949	928.543		1000000000	150.509	262.617	1172.6
1000000000	270.449	198.977	-83.1837		1000000001	59.9999	210.143	-1020.49		1000000001	118.21	55.8926	928.201		1000000000	149.985	262.668	1176.94
1000000000	269.56	198.604	-82.1177		1000000001	60.3862	210.721	-1023.62		1000000001	118.266	57.3855	928.7		1000000000	149.842	262.5	1175.98
1000000000	270.116	199.214	-84.6678		1000000001	60.5214	209.828	-1023.22		1000000001	117.538	56.6082	930.288		1000000000	149.798	263.595	1172.14
1000000000	269.134	199.221	-82.1391		1000000001	60.338	210.544	-1023.08		1000000001	117.637	56.9449	927.646		1000000000	150.031	263.318	1172.18
1000000000	268.987	199.51	-82.6268		1000000001	59.4811	210.141	-1023.33		1000000001	117.485	56.877	929.247		1000000000	149.518	263.134	1175.19
1000000000	269.067	198.768	-82.2755		1000000001	59.3644	208.958	-1023.02		1000000001	118.43	56.7823	934.162		1000000000	149.427	263.738	1177.11
1000000000	268.425	199.544	-83.1974		1000000001	59.4208	209.199	-1022.57		1000000001	118.463	57.2939	932.792		1000000000	149.626	263.945	1175.93
1000000000	269.258	199.643	-82.5512		1000000001	59.7651	209.32	-1022.12		1000000001	118.927	57.1488	933.362		1000000000	149.391	264.473	1175.89
1000000000	269.221	199.736	-84.0009		1000000001	58.4461	207.935	-1022.09		1000000001	118.735	56.883	934.31		1000000000	149.342	263.568	1171.79
1000000000	269.373	199.952	-82.2781		1000000001	58.4675	207.483	-1020.91		1000000001	117.656	57.7789	933.784		1000000000	148.977	263.788	1176.47
1000000000	269.469	199.461	-82.4628		1000000001	58.5095	206.982	-1022.19		1000000001	117.34	58.358	933.859		1000000000	149.486	263.753	1176.31
1000000000	270.371	199.208	-84.6136		1000000001	58.9504	206.756	-1021.32		1000000001	116.196	58.9133	933.653		1000000000	149.845	264.229	1172.61
1000000000	270.749	199.429	-82.5402		1000000001	58.0258	206.969	-1020.52		1000000001	117.079	59.5342	936.594		1000000000	149.351	263.876	1172.05
1000000000	269.878	199.165	-82.2308		1000000001	58.8043	206.286	-1020.32		1000000001	118.166	57.6815	934.012		1000000000	149.443	263.424	1176.53
1000000000	269.847	199.429	-82.6748		1000000001	58.3938	206.536	-1020.91		1000000001	118.798	57.858	934.472		1000000000	150.097	264.316	1176.44
1000000000	270.396	199.728	-81.0336		1000000001	58.0913	205.785	-1022.5		1000000001	117.749	58.2572	936.85		1000000000	149.854	263.941	1175.78
1000000000	270.201	200.511	-79.7501		1000000001	58.9919	206.098	-1020.79		1000000001	117.886	58.5627	936.276		1000000000	149.924	264.202	1175.55
1000000000	270.002	201.587	-81.0932		1000000001	58.4904	205.758	-1020.51		1000000001	117.373	58.8823	936.376		1000000000	150.177	263.833	1176.2
1000000000	269.777	200.582	-80.4486		1000000001	58.5675	205.644	-1022.14		1000000001	117.601	57.6203	935.52		1000000000	150.088	263.524	1176.55
1000000000	267.713	200.169	-81.5339		1000000001	58.8723	205.388	-1022.47		1000000001	117.652	58.2854	933.878		1000000000	149.044	263.591	1175.96
1000000000	268.907	198.003	-80.5043		1000000001	59.1959	205.35	-1022.29		1000000001	117.038	57.8263	935.383		1000000000	149.39	264.009	1176.02
1000000000	268.377	198.381	-77.7421		1000000001	59.9177	205.552	-1022.63		1000000001	117.238	59.0897	933.117		1000000000	149.07	264.409	1173.18
1000000000	268.875	198.357	-82.1411		1000000001	58.9163	205.521	-1023.29		1000000001	117.591	58.299	935.795		1000000000	149.333	264.67	1174.47
1000000000	268.902	198.12	-82.0507		1000000001	59.3852	206.193	-1020.36		1000000001	117.216	58.4922	934.631		1000000000	149.474	263.51	1176.05
1000000000	268.264	198.098	-77.7673		1000000001	59.2042	206.031	-1023.38		1000000001	117.341	58.5194	937.969		1000000000	149.361	264.1	1173.37
1000000000	268.548	197.359	-77.192		1000000001	58.8882	205.22	-1022.88		1000000001	119.133	57.8519	933.017		1000000000	148.867	264.06	1173.32
1000000000	268.046	197.345	-81.1691		1000000001	59.0778	204.482	-1022.87		1000000001	118.538	58.1731	933.116		1000000000	149.784	263.989	1173.96
1000000000	267.813	196.755	-81.7043		1000000001	59.0466	204.887	-1022.44		1000000001	119.218	58.4492	932.309		1000000000	149.766	263.757	1172.39
1000000000	270.154	196.68	-81.3613		1000000001	59.7019	205.963	-1023.59		1000000001	118.118	59.1691	934.614		1000000000	148.392	264.799	1172.08
1000000000	269.87	196.576	-81.9113		1000000001	59.397	206.107	-1023.55		1000000001	117.02	59.764	934.245		1000000000	149.726	264.497	1176.08
1000000000	268.962	196.088	-82.3476		1000000001	59.8124	206.092	-1019.86		1000000001	116.552	60.2697	937.528		1000000000	149.339	264.237	1174.85
1000000000	271.682	199.448	-85.7645		1000000001	58.6248	206.134	-1021.41		1000000001	115.064	60.8386	937.103		1000000000	148.536	264.411	1176.62
1000000000	270.747	198.704	-86.4332		1000000001	58.4356	206.499	-1025.99		1000000001	116.899	61.335	937.148		1000000000	149.431	264.593	1177.18
1000000000	269.868	198.151	-82.4694		1000000001	57.6158	206.548	-1023.98		1000000001	117.444	61.6607	936.03		1000000000	149.248	263.72	1176.57
1000000000	275.811	200.557	-86.836		1000000001	57.7695	205.89	-1022.21		1000000001	117.011	60.9453	934.375		1000000000	149.29	264.675	1176.96
1000000000	276.075	200.156	-86.7723		1000000001	56.7432	206.495	-1024		1000000001	116.833	59.6499	934.551		1000000000	149.597	264.325	1177.22
1000000000	276.182	200.961	-86.7535		1000000001	57.0924	206.239	-1022.75		1000000001	117.618	59.4265	937.752		1000000000	149.454	264.587	1176.69
1000000000	277.078	202.076	-86.9524		1000000001	57.1091	206.016	-1020.44		1000000001	118.094	58.7772	936.489		1000000000	149.161	264.369	1177.19
1000000000	279.981	202.882	-86.8481		1000000001	57.459	206.325	-1022.72		1000000001	118.044	58.9587	936.734		1000000000	150.099	265.415	1176.75
1000000000	280.419	204.509	-87.0101		1000000001	53.3908	205.15	-1020.16		1000000001	117.993	59.5645	938.304		1000000000	150.418	264.464	1176.3
1000000000	279.507	202.457	-88.6775		1000000001	50.127	205.523	-1019.27		1000000001	117.195	60.4147	937.276		1000000000	150.517	265.022	1176.03
1000000000	279.495	201.906	-86.5637		1000000001	52.3939	206.052	-1020.86		1000000001	117.202	61.9628	931.277		1000000000	150.843	265.072	1180.12
1000000000	279.158	202.407	-89.1546		1000000001	54.09	205.684	-1023.3		1000000001	117.832	62.4994	932.78		1000000000	150.501	265.346	1174
1000000000	278.953	202.273	-86.5797		1000000001	55.8579	205.878	-1023.27		1000000001	117.069	63.1967	929.491		1000000000	151.089	265.486	1175.17
1000000000	278.57	202.044	-87.0323		1000000001	55.9389	206.346	-1022.84		1000000001	118.078	63.4781	928.966		1000000000	151.233	265.018	1174.52
1000000000	278.281	201.247	-87.3911		1000000001	55.1666	205.306	-1020.65		1000000001	118.159	63.1686	933.068		1000000000	150.61	264.736	1176.83
1000000000	279.344	201.643	-87.0119		1000000001	55.0585	205.84	-1019.8		1000000001	117.895	63.5041	933.612		1000000000	149.673	264.224	1176.55
1000000000	278.018	200.96	-89.8789		1000000001	54.7879	205.315	-1019.84		1000000001	117.813	61.8977	934.89		1000000000	150.75	264.677	1176.16
1000000000	278.271	200.683	-87.3568		1000000001	55.5721	206.181	-1021.94		1000000001	117.709	60.1455	935.789		1000000000	150.377	264.95	1177.17
1000000000	277.749	201.773	-87.7164		1000000001	55.7271	205.514	-1020.01		1000000001	117.93	59.5943	936.426		1000000000	151.258	265.07	1174.03
1000000000	278.999	201.024	-87.0126		1000000001	55.7685	205.729	-1022.5		1000000001	116.495	60.7207	937.57		1000000000	149.616	264.008	1173
1000000000	278.308	201.267	-88.1575		1000000001	55.8017	205.634	-1023.07		1000000001	117.227	59.4805	936.192		1000000000	149.758	263.716	1177.83
1000000000	278.82	201.992	-87.3098		1000000001	55.1719	204.966	-1021.87		1000000001	117.686	59.7646	935.951		1000000000	150.162	264.84	1175.38
1000000000	278.469	201.711	-90.9994		1000000002	106.206	184.09	-1013.79		1000000001	118.46	59.6227	934.61		1000000000	149.163	264.363	1177.26
1000000000	278.005	201.1	-85.9933		1000000002	106.562	184.079	-1012.9		1000000001	118.206	60.1461	936.708		1000000000	150.256	264.411	1176.4
1000000000	278.397	201.485	-88.3483		1000000002	105.881	184.326	-1011.79		1000000001	118.216	60.7699	938.165		1000000000	150.073	264.332	1177.59
1000000000	278.362	200.837	-87.1412		1000000002	105.866	184.601	-1011.9		1000000001	119.218	61.5679	938.659		1000000000	150.212	265.196	1176.86
1000000000	276.739	200.798	-86.7797		1000000002	107.165	183.694	-1014.19		1000000001	120.736	63.2605	935.929		1000000000	150.306	264.902	1176.85
1000000000	277.348	200.59	-86.7687		1000000002	107.613	183.251	-1013.67		1000000001	119.997	63.3298	938.213		1000000000	150.44	264.475	1176.95
1000000000	277.638	200.609	-86.476		1000000002	107.847	182.572	-1012.14		1000000001	120.237	63.3788	939.96		1000000000	150.618	264.728	1177.3
1000000000	277.926	200.669	-87.1238		1000000002	107.62	183.209	-1012.85		1000000001	120.148	62.79	939.336		1000000000	151.151	265.469	1178.41
1000000000	277.611	199.741	-86.7663		1000000002	107.359	183.144	-1012.88		1000000001	120.558	62.6499	939.762		1000000000	150.924	264.837	1177.62
1000000000	276.659	198.906	-86.9048		1000000002	105.379	182.89	-1014.83		1000000001	119.005	61.6407	936.236		1000000000	149.875	263.979	1176.36
1000000000	276.346	199.411	-86.7607		1000000002	105.902	183.237	-1013.81		1000000001	119.635	62.204	934.351		1000000000	150.159	264.562	1176.35
1000000000	276.259	198.884	-86.4801		1000000002	105.538	183.056	-1013.06		1000000001	117.973	61.0207	935.672		1000000000	150.028	264.654	1177.15
1000000000	276.55	199.281	-85.9141		1000000002	106.145	182.485	-1012.88		1000000001	117.74	60.3297	936.816		1000000000	149.294	264.416	1178
1000000000	277.375	199.798	-86.2724		1000000002	105.632	182.83	-1014.19		1000000001	118.27	60.2471	936.972		1000000000	150.078	263.979	1176.56
1000000000	277.164	196.884	-83.103		1000000002	105.8	182.942	-1013.48		1000000001	117.424	60.1878	937.31		1000000000	149.359	263.773	1177.84
1000000000	276.675	197.785	-84.7702		1000000002	105.288	182.31	-1014.56		1000000002	18.6409	94.2969	923.324		1000000000	150.382	264.85	1177.56
1000000000	276.74	197.524	-85.679		1000000002	105.356	182.965	-1013.44		1000000002	19.1427	95.4526	922.102		1000000000	150.582	264.868	1179.49
1000000000	276.399	197.073	-85.7614		1000000002	105.493	183.248	-1012.8		1000000002	18.6666	94.7131	920.225		1000000000	149.971	264.758	1176.81
1000000000	277.113	197.085	-86.6731		1000000002	105.796	183.173	-1012.79		1000000002	17.7177	93.8564	922.176		1000000000	150.586	265.143	1176.08
1000000000	276.273	197.604	-85.4413		1000000002	106.131	183.275	-1013.22		1000000002	17.3075	92.9505	920.336		1000000000	150.567	264.367	1172.66
1000000000	275.983	198.29	-86.3321		1000000002	105.111	183.416	-1012.76		1000000002	17.7291	92.8091	920.287		1000000000	150.165	264.441	1173.22
1000000000	276.625	197.979	-85.9771		1000000002	105.02	183.323	-1012.73		1000000002	18.5486	93.5576	918.592		1000000000	150.968	265.589	1175.72
1000000000	276.06	197.68	-86.4708		1000000002	105.287	182.466	-1014.95		1000000002	18.5154	95.1408	918.388		1000000000	151.159	265.356	1179.41
1000000000	275.605	197.472	-85.0442		1000000002	105.57	183.9	-1012.19		1000000002	18.6628	93.9479	918.534		1000000000	151.24	265.63	1179.13
1000000000	276.157	197.455	-87.2439		1000000002	105.437	183.436	-1011.23		1000000002	19.1534	93.881	922.963		1000000000	150.777	264.708	1177.43
1000000000	276.301	198.034	-88.4707		1000000002	105.505	183.718	-1011.71		1000000002	19.5666	94.2597	923.114		1000000000	150.92	264.636	1177.82
1000000000	276.177	198.861	-87.1186		1000000002	105.84	184.161	-1010.28		1000000002	20.1625	95.0076	922.848		1000000000	150.931	264.925	1176.46
1000000000	276.394	199.568	-87.6463		1000000002	106.075	184.115	-1012.39		1000000002	20.6589	96.0806	922.864		1000000000	151.078	265.344	1175.78
1000000000	276.138	199.211	-88.8524		1000000002	105.414	184.194	-1012.18		1000000002	20.6817	97.1116	922.691		1000000000	152.068	265.824	1176.15
1000000000	276.883	199.375	-85.5819		1000000002	105.709	184.091	-1011.6		1000000002	19.974	96.332	924.227		1000000000	151.913	265.502	1177.16
1000000000	276.815	199.274	-86.2185		1000000002	105.352	185.106	-1011.6		1000000002	21.7771	97.1792	923.308		1000000000	151.16	265.944	1177.15
1000000000	276.947	199.717	-86.053		1000000002	103.968	186.971	-1015		1000000002	21.526	98.0117	921.913		1000000000	150.07	265.674	1177.68
1000000000	276.718	199.332	-85.7816		1000000002	104.261	186.767	-1015.26		1000000002	22.1863	99.0582	922.539		1000000000	151.14	266.556	1179.71
1000000000	277.19	199.693	-86.6229		1000000002	104.072	186.724	-1011.3		1000000002	21.8698	98.5918	922.74		1000000000	150.786	265.69	1180.08
1000000000	275.93	199.382	-87.6332		1000000002	103.334	187.58	-1013.67		1000000002	22.2734	98.5116	922.814		1000000000	150.848	265.941	1177.3
1000000000	276.001	198.916	-87.5957		1000000002	103.359	188.802	-1016.14		1000000002	21.9382	98.2058	922.88		1000000000	151.807	266.184	1180.09
1000000000	276.835	199.724	-88.0845		1000000002	102.447	189.181	-1015.45		1000000002	21.9486	98.3827	927.569		1000000000	151.231	265.21	1173.49
1000000000	275.833	199.288	-86.0075		1000000002	103.419	189.201	-1012.99		1000000002	21.8765	98.1442	926.638		1000000000	151.575	266.025	1176.71
1000000000	276.598	199.418	-85.5533		1000000002	103.829	191.818	-1014.79		1000000002	22.2949	99.7205	926.653		1000000000	151.761	266.12	1177.33
1000000000	276.729	199.334	-88.3746		1000000002	104.286	192.457	-1013.27		1000000002	21.766	100.782	927.881		1000000000	151.225	266.097	1178.17
1000000000	275.841	198.411	-88.1298		1000000002	105.337	194.312	-1012.78		1000000002	22.1877	100.257	927.959		1000000000	151.803	267.009	1178.81
1000000000	276.663	199.323	-86.8411		1000000002	106.51	194.664	-1012.83		1000000002	24.9373	102.708	927.798		1000000000	151.535	265.62	1176.72
1000000000	276.53	199.041	-87.1861		1000000002	106.599	194.876	-1012.91		1000000002	25.387	102.553	927.523		1000000000	151.443	266.228	1178.33
1000000000	275.899	200.194	-84.5878		1000000002	106.586	194.861	-1012.69		1000000002	25.451	102.188	927.847		1000000000	151.361	265.999	1176.75
1000000000	276.16	198.878	-86.3068		1000000002	107.164	194.746	-1016.25		1000000002	26.6357	102.842	927.685		1000000000	151.511	265.828	1177.63
1000000000	275.876	198.736	-88.7323		1000000002	106.031	194.965	-1016.3		1000000002	28.1845	102.765	927.368		1000000000	151.619	266.322	1177.8
1000000000	276.159	197.352	-82.7345		1000000002	106.481	194.868	-1016.29		1000000002	27.7604	103.884	926.971		1000000000	151.781	266.127	1176.81
1000000000	276.098	198.067	-87.2376		1000000002	105.499	194.832	-1016.28		1000000002	27.1593	104.357	927.877		1000000000	151.262	266.33	1179.62
1000000000	275.633	198.133	-87.509		1000000003	228.257	192.616	-1036.88		1000000002	25.668	105.108	927.441		1000000000	151.381	266.075	1176.62
1000000000	275.428	197	-89.1467		1000000003	228.763	192.476	-1036.98		1000000002	24.7186	106.76	927.445		1000000000	151.786	266.403	1176.04
1000000000	276.031	198.183	-86.7513		1000000003	229.582	190.901	-1036.57		1000000002	24.9619	106.833	927.182		1000000000	151.653	265.868	1176.02
1000000000	276.479	197.328	-86.5946		1000000003	229.54	189.706	-1034.51		1000000002	27.3254	107.867	924.926		1000000000	150.932	265.637	1176.22
1000000000	276.277	197.264	-87.3574		1000000003	230.508	189.962	-1038.16		1000000002	29.8191	108.874	923.518		1000000000	151.398	267.087	1177.1
1000000000	276.579	196.489	-86.1089		1000000003	230.462	188.5	-1037.55		1000000002	31.1065	110.295	924.307		1000000000	151.33	266.368	1176.08
1000000000	277.156	196.864	-85.7269		1000000003	230.404	187.587	-1037.74		1000000002	32.4416	111.821	923.125		1000000000	151.749	266.908	1179.87
1000000000	277.1	197.778	-89.3152		1000000003	230.121	187.214	-1037.4		1000000002	32.841	112.004	924.854		1000000000	151.481	266.299	1180.24
1000000000	276.928	197.079	-87.0657		1000000003	230.039	185.654	-1036.64		1000000003	225.95	127.063	902.468		1000000000	151.603	266.478	1177.04
1000000000	277.167	197.965	-86.7958		1000000003	230.01	182.264	-1036.58		1000000003	226.185	127.859	902.696		1000000000	151.693	266.268	1179.75
1000000000	277.14	198.447	-86.9087		1000000003	229.508	180.335	-1033.71		1000000003	224.797	127.896	897.67		1000000000	151.701	266.684	1180.73
1000000000	277.217	197.719	-86.6073		1000000003	229.027	180.091	-1033.65		1000000003	225.041	126.843	897.67		1000000000	151.182	267.157	1176.27
1000000000	277.467	199.544	-86.3698		1000000003	228.133	179.923	-1033.62		1000000003	225.85	127.122	897.67		1000000000	150.657	267.126	1177.36
1000000000	278.15	198.288	-88.1339		1000000003	227.965	180.089	-1033.71		1000000003	225.893	126.707	897.67		1000000000	151.58	267.204	1177.53
1000000000	277.739	199.294	-88.7786		1000000003	228.291	180.411	-1032.93		1000000003	226	126.837	897.67		1000000000	151.216	267.126	1176.89
1000000000	277.739	198.657	-89.2815		1000000003	226.224	179.853	-1032.08		1000000003	225.905	126.963	897.67		1000000000	152.098	267.359	1177.54
1000000000	277.554	199.305	-87.7391		1000000003	225.756	180.056	-1031.93		1000000003	226.048	126.634	897.67		1000000000	151.596	267.074	1177.18
1000000000	277.754	198.831	-86.1492		1000000003	227.07	179.48	-1032.86		1000000003	226.003	126.654	902.957		1000000000	152.001	267.054	1180.17
1000000000	276.774	199.035	-86.4636		1000000003	227.004	179.475	-1033.17		1000000003	226.769	126.749	902.923		1000000000	152.109	266.933	1180.62
1000000000	277.973	198.429	-86.7133		1000000003	228.282	179.787	-1032.75		1000000003	226.973	126.805	903.013		1000000000	151.816	266.876	1176.39
1000000000	277.613	198.622	-86.8099		1000000003	227.901	178.841	-1032.93		1000000003	226.49	126.334	903.138		1000000000	151.933	266.856	1179.82
1000000000	277.795	198.875	-87.0011		1000000003	228.241	178.829	-1032.51		1000000003	226.549	126.557	902.934		1000000000	152.139	266.81	1180.18
1000000000	277.765	199.802	-86.7254		1000000003	229.294	178.526	-1032.98		1000000003	226.699	126.396	902.985		1000000000	151.831	267.524	1175.3
1000000000	278.122	199.162	-87.3904		1000000003	230.07	179.186	-1030.85		1000000003	226.286	125.695	903.5		1000000000	151.511	266.688	1176.15
1000000000	277.441	199.971	-87.0726		1000000003	230.937	179.23	-1031.42		1000000003	226.114	126.928	903.262		1000000000	152.308	266.726	1175.21
1000000000	277.292	200.201	-87.6279		1000000003	232.065	179.226	-1032.88		1000000003	226.946	126.747	903.101		1000000000	151.83	266.872	1176.05
1000000000	278.275	199.979	-87.6592		1000000003	233.275	179.557	-1029.32		1000000003	226.48	126.116	903.74		1000000000	151.719	267.061	1176.9
1000000000	278.119	199.118	-86.9522		1000000003	234.072	180.357	-1031.94		1000000003	226.021	126.41	903.458		1000000000	151.429	266.587	1175.69
1000000000	277.763	200.096	-86.2105		1000000003	234.159	179.755	-1030.14		1000000003	225.062	126.823	903.406		1000000000	152.846	266.898	1180.13
1000000000	277.352	198.841	-85.7171		1000000003	234.436	179.983	-1029.93		1000000003	224.406	126.223	908.152		1000000000	151.782	266.632	1176.06
1000000000	276.925	198.069	-85.9217		1000000003	234.884	180.019	-1029.82		1000000003	225.47	125.466	909.456		1000000000	151.571	266.393	1175.89
1000000000	276.917	198.296	-86.7078		1000000003	235.209	179.59	-1030.1		1000000003	227.258	127.189	908.655		1000000000	151.687	266.354	1176.59
1000000000	276.799	198.818	-86.7187		1000000003	234.25	178.568	-1031.76		1000000003	223.768	126.587	910.806		1000000000	152.232	267.074	1180.72
1000000000	276.924	198.058	-86.73		1000000003	234.656	178.8	-1027.01		1000000003	224.822	128.402	908.477		1000000000	152.835	266.774	1181.34
1000000000	275.716	197.842	-86.6801		1000000003	235.137	178.896	-1027.46		1000000003	223.906	130.935	908.176		1000000000	151.417	266.623	1177.29
1000000000	276.047	197.577	-86.9061		1000000003	234.434	179.942	-1033.29		1000000003	224.232	130.384	908.835		1000000000	151.363	266.66	1178.94
1000000000	276.147	198.104	-86.1898		1000000003	237.536	178.982	-1029.82		1000000003	223.473	128.271	911.544		1000000000	151.158	266.25	1176.82
1000000000	276.748	197.673	-83.869		1000000003	239.031	178.814	-1029.24		1000000003	223.995	127.163	912.535		1000000000	151.088	266.824	1176.12
1000000000	277.247	198.398	-86.6604		1000000003	240.773	179.406	-1031.12		1000000003	224.486	126.934	912.5		1000000000	151.998	265.653	1177.27
1000000000	277.502	197.861	-86.5417		1000000003	244.449	181.526	-1028.85		1000000003	227.423	126.615	912.791		1000000000	152.435	266.795	1178.67
1000000000	276.928	198.222	-86.8245		1000000003	244.549	181.597	-1027.85		1000000003	229.734	126.163	912.334		1000000000	151.745	266.269	1177.64
1000000000	277.319	197.924	-86.4735		1000000003	245.335	182.268	-1027.32		1000000003	230.127	126.545	913.081		1000000000	151.538	266.563	1176.54
1000000000	277.261	198.662	-86.4482		1000000003	244.005	180.771	-1031.05		1000000003	231.407	125.787	914.229		1000000000	150.808	265.547	1177.39
1000000000	277.413	197.997	-86.0723		1000000004	201.877	198.107	-1036.14		1000000003	232.182	124.195	917.015		1000000000	152.134	266.754	1177.34
1000000000	277.311	198.872	-86.0794		1000000004	201.809	198.912	-1034.79		1000000003	233.977	123.065	916.203		1000000000	152.518	266.951	1181.24
1000000000	277.985	198.571	-83.4609		1000000004	200.585	198.806	-1034.18		1000000003	232.392	122.941	916.884		1000000000	151.78	266.121	1180.53
1000000000	277.423	198.072	-84.8866		1000000004	199.048	199.244	-1034.24		1000000003	231.888	123.781	913.625		1000000000	152.497	266.509	1180.26
1000000000	277.747	198.11	-84.6725		1000000004	198.701	199.503	-1037.45		1000000003	229.911	125.007	910.608		1000000000	151.702	266.616	1179.06
1000000000	277.156	197.926	-83.0934		1000000004	197.72	200.135	-1037.62		1000000003	230.49	125.413	912.481		1000000000	151.967	266.185	1179.27
1000000000	276.727	198.376	-86.1209		1000000004	195.877	200.386	-1037.5		1000000003	229.871	126.262	913.07		1000000000	152.404	266.197	1181.51
1000000000	277.107	198.583	-86.3562		1000000004	194.608	200.828	-1037.48		1000000003	229.948	125.64	912.938		1000000000	151.986	266.516	1181.09
1000000000	277.438	198.642	-85.8171		1000000004	193.978	201.158	-1037.47		1000000003	229.925	123.653	914.758		1000000000	152.039	265.676	1181.33
1000000000	277.006	198.685	-84.8591		1000000004	192.708	201.749	-1037.15		1000000003	231.653	124.104	914.487		1000000000	152.359	266.259	1180.81
1000000000	276.879	198.822	-84.9102		1000000004	192.418	201.881	-1035.92		1000000003	229.841	123.819	914.481		1000000000	151.763	265.882	1181.12
1000000000	277.117	198.758	-86.722		1000000004	190.642	202.641	-1035.43		1000000003	232.056	123.713	915.485		1000000000	152.391	265.953	1180.03
1000000000	276.372	197.752	-86.7236		1000000004	190.114	202.483	-1034.82		1000000003	234.124	123.696	913.238		1000000000	151.786	265.7	1178.27
1000000000	276.398	197.366	-87.2536		1000000004	188.612	202.891	-1034.34		1000000003	231.132	124.969	912.859		1000000000	151.267	265.967	1179.77
1000000000	277.095	196.929	-85.1155		1000000004	187.983	202.734	-1034.53		1000000003	231.999	124.074	912.793		1000000001	145.687	221.954	1179.69
1000000000	277.299	198.902	-86.789		1000000004	185.924	203.151	-1034.33		1000000003	232.118	124.869	912.869		1000000001	144.744	222.166	1178.42
1000000000	278.48	198.651	-87.667		1000000004	183.476	203.355	-1034.36		1000000004	215.087	95.9519	937.8		1000000001	144.818	221.768	1176.44
1000000000	278.858	198.475	-82.8465		1000000004	182.157	203.191	-1034.51		1000000004	214.854	96.0086	937.552		1000000001	145.032	221.348	1176.97
1000000000	278.636	199.516	-86.158		1000000004	181.242	203.408	-1034.45		1000000004	215.542	95.5413	936.16		1000000001	144.711	221.434	1175.94
1000000000	278.346	199.257	-85.2526		1000000004	180.98	203.329	-1034.33		1000000004	215.668	95.8051	938.058		1000000001	144.191	222.058	1175.02
1000000000	277.962	199.351	-85.7966		1000000004	179.254	204.06	-1033.89		1000000004	215.313	95.6582	935.053		1000000001	145.238	221.527	1176.19
1000000000	277.76	198.888	-84.9225		1000000004	178.697	204.387	-1033.68		1000000004	214.827	95.8908	938.728		1000000001	144.506	221.21	1175.43
1000000000	277.587	198.071	-83.5569		1000000004	178.85	204.216	-1034.68		1000000004	215.39	95.0945	938.904		1000000001	145.001	221.013	1176.21
1000000000	277.823	199.731	-87.2192		1000000004	179.071	204.974	-1033.48		1000000004	214.719	95.0855	938.075		1000000001	144.07	220.914	1176.51
1000000000	277.037	199.964	-87.5315		1000000004	178.849	205.409	-1033.64		1000000004	214.625	94.9468	937.991		1000000001	144.514	220.662	1175.77
1000000000	277.384	199.865	-85.2584		1000000004	178.869	206.469	-1034.25		1000000004	213.04	95.3802	943.428		1000000001	143.927	221.114	1176.12
1000000000	277.619	200.203	-83.7288		1000000004	178.681	206.524	-1033.07		1000000004	214.158	95.5156	943.81		1000000001	144.157	221.495	1176.04
1000000000	277.371	199.85	-83.9821		1000000004	179.211	206.329	-1036.08		1000000004	213.585	95.7711	946.288		1000000001	143.757	221.225	1176.68
1000000000	278.097	200.424	-87.8742		1000000004	178.533	207.553	-1034.41		1000000004	213.071	95.768	944.69		1000000001	144.668	221.225	1176.25
1000000000	278.443	199.927	-87.0188		1000000004	178.423	207.595	-1034.89		1000000004	213.382	95.1564	943.331		1000000001	145.057	221.282	1175.08
1000000000	278.609	200.445	-87.0028		1000000004	178.606	208.016	-1033.5		1000000004	213.176	96.0251	946.669		1000000001	144.821	221.275	1176.71
1000000000	278.312	201.4	-87.1113		1000000004	178.333	208.344	-1036.15		1000000004	213.109	96.1873	946.752		1000000001	143.904	220.818	1176.19
1000000000	279.167	199.635	-86.9972		1000000004	178.221	208.405	-1036.29		1000000004	213.466	95.4321	946.569		1000000001	144.346	220.96	1177.13
1000000000	279.101	200.624	-87.1903		1000000004	176.43	210.617	-1032.37		1000000004	212.996	95.7995	946.578		1000000001	144.666	221.216	1177.45
1000000000	278.662	199.412	-87.2444		1000000004	175.31	214.144	-1030.83		1000000004	212.179	96.0161	947.199		1000000001	144.691	220.779	1177.97
1000000000	279.176	199.213	-86.8053		1000000004	174.869	212.842	-1036.57		1000000004	213.534	96.2721	946.299		1000000001	144.932	221.209	1177.71
1000000000	278.455	199.214	-86.5106		1000000004	173.924	216.517	-1035.45		1000000004	212.612	96.5575	943.773		1000000001	143.437	220.709	1178.36
1000000000	277.836	198.956	-84.396		1000000004	174.096	218.341	-1033.79		1000000004	212.902	96.4192	950.752		1000000001	144.77	221.06	1177.16
1000000000	277.18	199.114	-85.4379		1000000004	173.917	219.917	-1034.42		1000000004	212.388	97.4451	951.427		1000000001	144.349	221.045	1180.64
1000000000	276.957	199.021	-84.0605		1000000004	173.219	222.317	-1032.88		1000000004	213.599	97.432	951.253		1000000001	143.551	221.446	1177.27
1000000000	276.292	198.184	-85.1085		1000000004	173.298	222.38	-1032.08		1000000004	212.458	97.5909	951.504		1000000001	144.048	221.816	1180.15
1000000001	162.462	262.893	-66.3076		1000000004	173.327	222.07	-1030.8		1000000004	212.846	97.9124	951.514		1000000001	144.42	221.326	1180.97
1000000001	159.276	261.495	-65.1764		1000000004	173.379	223.108	-1030.54		1000000004	213.116	98.2156	951.918		1000000001	144.618	221.892	1180.78
1000000001	157.437	261.045	-62.5139		1000000004	174.37	223.519	-1028.47		1000000004	212.468	98.2333	952.035		1000000001	144.093	221.257	1180.8
1000000001	155.854	261.422	-63.1271		1000000004	175.587	223.074	-1030.81		1000000004	213.464	99.7189	951.778		1000000001	143.448	221.086	1176.71
1000000001	152.969	261.801	-65.4965		1000000004	176.039	222.743	-1033.37		1000000005	33.0352	184.394	941.504		1000000001	144.784	221.5	1176.92
1000000001	151.794	261.615	-66.7154		1000000004	175.889	220.78	-1030.89		1000000005	31.8387	183.47	939.546		1000000001	143.984	221.654	1176.58
1000000001	149.669	261.718	-67.4819		1000000004	177.228	221.519	-1029.87		1000000005	31.5376	184.052	937.79		1000000001	144.484	220.934	1177.22
1000000001	146.201	260.906	-66.9112		1000000004	176.642	219.979	-1027.81		1000000005	30.7682	182.897	938.094		1000000001	144.064	220.418	1176.18
1000000001	145.655	260.618	-65.6505		1000000004	177.184	220.048	-1026.34		1000000005	30.2931	182.477	938.054		1000000001	143.559	220.526	1176.83
1000000001	143.895	259.066	-63.4637		1000000004	177.256	219.64	-1025.15		1000000005	29.279	182.112	937.69		1000000001	144.334	220.546	1176.68
1000000001	142.277	259.313	-67.6622		1000000004	176.92	219.663	-1025.97		1000000005	27.1228	182.79	936.891		1000000001	143.544	219.914	1176.45
1000000001	141.828	258.796	-66.9955		1000000004	177.136	219.531	-1024.7		1000000005	26.8545	181.598	934.547		1000000001	144.207	219.765	1180.28
1000000001	141.542	259.185	-66.906		1000000004	177.257	219.3	-1027.15		1000000005	25.4265	180.974	934.133		1000000001	144.27	220.108	1176.37
1000000001	141.544	258.76	-62.4206		1000000004	176.843	220.106	-1028.41		1000000005	24.6251	180.689	938.633		1000000001	143.771	220.406	1176.4
1000000001	141.014	259.393	-62.0666		1000000004	176.096	219.99	-1028.07		1000000005	24.7712	181.575	940.699		1000000001	144.306	220.191	1176.45
1000000001	139.433	260.294	-60.1857		1000000005	190.003	212.779	-1035.56		1000000005	23.9231	181.939	940.425		1000000001	144.095	219.869	1181.28
1000000001	137.566	260.855	-57.567		1000000005	190.903	213.047	-1034.31		1000000005	25.9082	183.715	939.856		1000000001	143.463	220.12	1181.08
1000000001	136.715	260.751	-56.6616		1000000005	190.103	212.691	-1033.9		1000000005	26.3085	187.163	941.498		1000000001	143.87	220.024	1175.99
1000000001	135.858	260.97	-60.8783		1000000005	188.721	213.862	-1033.7		1000000005	27.8842	189.173	939.09		1000000001	143.968	219.835	1176.07
1000000001	135.38	260.883	-58.326		1000000005	188.884	214.147	-1037		1000000005	29.1794	192.938	940.922		1000000001	144.141	220.292	1180.26
1000000001	135.447	260.887	-58.5671		1000000005	189.34	214.078	-1037.41		1000000005	31.6619	196.761	943.427		1000000001	143.933	219.977	1180.9
1000000001	135.378	260.868	-56.5985		1000000005	189.854	213.632	-1037.02		1000000006	270.094	241.559	924.126		1000000001	144.046	220.739	1179.07
1000000001	135.278	261.784	-56.5773		1000000005	190.541	213.766	-1037.13		1000000006	270.385	241.653	922.069		1000000001	143.668	220.703	1181.48
1000000001	133.775	263.7	-56.671		1000000005	189.424	214.586	-1037		1000000006	270.168	242.135	921.725		1000000001	143.637	220.353	1176.34
1000000001	132.807	264.998	-57.1629		1000000005	187.559	220.034	-1037.31		1000000006	270.806	241.318	922.113		1000000001	143.706	220.498	1180.93
1000000001	131.665	265.483	-56.5769		1000000005	188.071	219.946	-1037.44		1000000006	269.947	240.701	919.321		1000000001	143.929	220.09	1181.79
1000000001	130.903	266.373	-57.4976		1000000005	186.499	220.915	-1037.08		1000000006	270.904	241.378	919.092		1000000001	143.846	221.014	1176.78
1000000001	130.921	267.006	-56.7708		1000000005	186.7	221.356	-1037.48		1000000006	271.138	240.609	918.201		1000000001	143.613	220.417	1177.67
1000000001	129.098	268.449	-57.1689		1000000005	186.521	220.524	-1037.1		1000000006	271.883	240.78	919.674		1000000001	144.318	220.478	1180.14
1000000001	129.783	269.668	-57.6666		1000000005	186.285	221.662	-1037.3		1000000006	271.27	241.186	918.495		1000000001	143.754	220.457	1180.67
1000000001	130.602	270.125	-57.9982		1000000005	186.863	221.009	-1036.12		1000000006	271.826	240.437	922.032		1000000001	144.433	220.846	1180.35
1000000001	131.361	270.725	-57.1564		1000000005	187.036	221.706	-1036.83		1000000006	271.723	240.749	920.914		1000000001	143.137	219.734	1178.49
1000000001	130.278	269.996	-56.8356		1000000005	186.589	221.982	-1036.48		1000000006	271.18	240.474	921.593		1000000001	143.696	220.544	1180.21
1000000001	128.632	269.923	-58.7948		1000000005	185.897	219.974	-1036.18		1000000006	270.388	240.263	921.022		1000000001	142.936	219.759	1181.1
1000000001	129.028	269.379	-53.0193		1000000005	187.611	218.941	-1036.69		1000000006	271.01	240.182	919.763		1000000001	142.842	220.931	1181.24
1000000001	127.1	268.555	-54.18		1000000005	187.447	218.186	-1035.62		1000000006	270.576	240.204	917.796		1000000001	142.835	220.041	1180.34
1000000001	125.292	268.782	-52.9813		1000000005	187.348	219.045	-1036.39		1000000006	271.678	239.995	918.51		1000000001	143.307	219.292	1177.01
1000000001	122.748	268.154	-54.0255		1000000005	188.56	218.832	-1037.25		1000000006	270.873	240.252	919.069		1000000001	144.009	219.964	1179.35
1000000001	123.568	267.827	-53.183		1000000005	188.369	218.127	-1034.96		1000000006	271.312	240.399	917.458		1000000001	143.685	219.978	1179.64
1000000001	122.754	268.587	-57.3241		1000000005	187.724	219.814	-1036.62		1000000006	272.663	240.507	918.185		1000000001	143.435	220.621	1176.7
1000000001	122.252	266.995	-57.4726		1000000005	188.113	217.87	-1036.33		1000000006	273.139	239.872	923.148		1000000001	142.932	220.441	1178.72
1000000002	329.323	333.369	-81.7362		1000000005	188.859	217.962	-1037.64		1000000006	273.228	239.126	922.458		1000000001	143.936	219.492	1177.05
1000000002	329.296	333.081	-81.9773		1000000005	188.365	217.39	-1036.8		1000000006	273.893	239.295	923.704		1000000001	143.695	219.49	1177.67
1000000002	329.568	333.475	-81.0202		1000000005	189.202	216.449	-1037.24		1000000006	273.192	238.275	923.111		1000000001	143.79	220.924	1179.48
1000000002	328.925	333.41	-81.432		1000000005	187.544	219.416	-1036.89		1000000006	274.22	237.811	923.399		1000000001	143.369	219.818	1178.99
1000000002	329.182	333.398	-81.3658		1000000005	187.884	218.788	-1040.6		1000000006	274.464	237.607	923.207		1000000001	143.311	219.179	1177.23
1000000002	329.192	333.782	-81.392		1000000005	190.68	213.853	-1038.47		1000000006	273.902	237.168	923.087		1000000001	143.553	219.695	1181.17
1000000002	329.523	333.046	-81.6402		1000000005	189.474	216.124	-1035.75		1000000006	273.642	236.049	924.313		1000000001	144.34	220.389	1181.33
1000000002	328.357	333.148	-81.6427		1000000005	190.658	213.787	-1034.4		1000000006	273.281	235.172	923.336		1000000001	142.426	220.16	1181.21
1000000002	328.428	333.612	-80.5547		1000000005	189.551	216.049	-1039.07		1000000006	273.27	234.279	922.109		1000000001	142.764	220.182	1180.42
1000000002	327.179	333.365	-80.4191		1000000005	190.024	218.447	-1040.54		1000000006	272.827	232.549	923.036		1000000001	142.689	221.095	1181.38
1000000002	326.778	333.606	-82.947		1000000005	189.437	214.932	-1037.39		1000000055	33.0728	227.435	941.117		1000000001	142.981	220.603	1181
1000000002	327.412	333.536	-83.5183		1000000005	190.412	215.605	-1037.56		1000000055	31.3035	227.364	938.115		1000000001	143.995	220.886	1181.62
1000000002	326.422	334.273	-84.2442		1000000005	189.212	214.884	-1037.48		1000000055	29.9011	227.729	942.194		1000000001	143.868	220.006	1180.05
1000000002	327.003	333.656	-81.0093		1000000005	188.996	216.807	-1038.03		1000000055	26.8841	230.308	942.025		1000000001	143.585	220.587	1179.09
1000000002	319.912	334.828	-77.9751		1000000005	188.526	218.047	-1036.86		1000000055	25.823	231.864	938.583		1000000001	143.283	219.229	1177.19
1000000002	318.488	335.352	-77.9773		1000000005	187.741	219.609	-1040.3		1000000055	25.7447	233.059	937.908		1000000001	142.686	218.735	1181.07
1000000002	318.621	335.373	-77.416		1000000005	189.234	215.914	-1039.49		1000000055	23.7069	234.188	934.882		1000000001	143.029	219.296	1175.95
1000000002	318.334	335.58	-78.8606		1000000005	188.963	215.862	-1038.59		1000000055	24.8648	233.497	934.732		1000000001	143.502	219.286	1176.56
1000000002	317.91	335.787	-82.1312		1000000005	188.363	215.678	-1037.73		1000000055	23.1893	234.097	934.277		1000000001	143.646	220.048	1177.78
1000000002	317.677	335.583	-82.1488		1000000005	187.722	215.249	-1038		1000000055	19.4728	234.02	930.026		1000000001	142.989	219.433	1179.26
1000000002	317.871	334.95	-82.2578		1000000005	188	216.832	-1036.79		1000000055	17.64	235.632	928.494		1000000001	143.676	218.863	1178.84
1000000002	318.367	334.537	-81.9318		1000000005	187.387	216.683	-1035.25		1000000055	17.2962	234.49	928.345		1000000001	143.276	218.977	1177.21
1000000002	318.781	334.532	-81.7594		1000000005	188.424	217.206	-1036.77		1000000055	16.2759	235.319	926.911		1000000001	143.721	219.821	1181.19
1000000002	318.333	335.078	-81.8711		1000000005	188.476	216.259	-1038.87		1000000055	16.5424	235.041	927.24		1000000001	144.132	220.042	1177.4
1000000002	318.51	334.954	-81.2021		1000000005	186.992	217.088	-1038.11		1000000055	14.7771	238.024	928.744		1000000001	143.61	219.641	1176.52
1000000002	319.262	335.323	-81.4922		1000000005	187.708	218.025	-1039.55		1000000055	14.7187	238.201	927.749		1000000001	143.518	219.917	1181.49
1000000002	319.385	335.291	-81.4678		1000000006	227.606	216.247	-1027		1000000055	13.7842	238.727	927.745		1000000001	143.299	219.788	1177.21
1000000002	318.354	335.045	-81.4785		1000000006	227.48	215.479	-1026.28		1000000055	11.117	238.857	926.61		1000000001	142.762	219.51	1181.16
1000000002	318.757	334.988	-80.8225		1000000006	226.72	213.341	-1026.32		1000000055	8.06568	240.811	923.968		1000000001	142.598	219.712	1180.08
1000000002	318.94	334.827	-81.2933		1000000006	226.721	213.851	-1025.36		1000000055	7.03865	242.362	923.664		1000000001	142.944	219.03	1180.9
1000000002	319.519	334.565	-80.1779		1000000006	226.95	214.642	-1028.08		1000000055	3.42739	245.368	922.421		1000000001	142.658	219.299	1179.08
1000000002	320.358	333.898	-80.5288		1000000006	226.939	214.181	-1029.7		1000000055	2.24459	245.71	922.383		1000000001	142.744	219.338	1180.54
1000000002	321.893	334.443	-78.1331		1000000006	226.552	215.149	-1029.39		1000000055	1.54266	245.398	922.784		1000000001	142.736	219.342	1180.08
1000000002	322.309	334.624	-82.0776		1000000006	226.458	214.901	-1030.28		1000000055	1.83425	246.488	921.857		1000000001	142.714	219.123	1180.93
1000000002	322.584	334.519	-77.2357		1000000006	227.46	215.656	-1029.69		1000000055	1.34749	246.653	922.995		1000000001	142.914	219.527	1181
1000000002	323.087	333.842	-76.9344		1000000006	228.206	216.498	-1028.17		1000000141	53.7976	205.232	931.5		1000000001	142.946	218.988	1180.48
1000000002	323.092	334.181	-77.1384		1000000006	229.418	218.271	-1030.08		1000000141	55.3688	206.946	928.854		1000000001	143.2	219.697	1179.23
1000000002	323.138	334.486	-77.5449		1000000006	229.318	219.312	-1029.14		1000000141	57.9973	210.238	928.798		1000000001	142.472	218.663	1176.91
1000000002	321.67	334.525	-77.7654		1000000006	229.84	219.304	-1028.43		1000000141	59.3307	211.219	934.829		1000000001	142.889	219.45	1179.85
1000000002	321.796	334.794	-78.458		1000000006	230.038	220.373	-1029.54		1000000141	60.2665	211.123	934.999		1000000001	142.968	219.61	1181.56
1000000002	320.353	334.851	-81.6412		1000000006	230.378	220.762	-1029.18		1000000141	61.3391	212.088	934.062		1000000001	143.29	219.208	1179.55
1000000002	320.591	334.908	-82.1644		1000000006	230.737	222.184	-1029.88		1000000141	61.0563	212.441	933.035		1000000001	142.192	219.905	1179.41
1000000002	321.092	335.025	-81.6158		1000000006	231.031	222.001	-1029.8		1000000141	61.2132	213.746	933.792		1000000001	143.064	219.297	1180.99
1000000002	320.308	334.247	-81.3317		1000000006	231.339	221.628	-1028.24		1000000141	61.9677	213.686	933.426		1000000001	142.749	219.473	1181.62
1000000002	321.897	335.239	-81.8079		1000000006	231.172	220.686	-1030.76		1000000141	61.9793	213.534	933.175		1000000001	142.967	219.078	1180.49
1000000002	322.061	335.125	-79.8879		1000000006	232.769	220.759	-1030.44		1000000141	61.0935	213.773	934.892		1000000001	142.591	218.545	1177.36
1000000002	322.374	335.563	-81.1672		1000000006	232.956	220.622	-1030.45		1000000141	61.5514	213.551	932.618		1000000001	143.213	218.703	1176.83
1000000002	322.681	335.052	-80.3769		1000000006	232.587	220.652	-1030.85		1000000141	61.4379	214.231	934.281		1000000001	142.462	218.599	1176.28
1000000002	321.919	335.392	-81.2424		1000000006	234.112	220.318	-1033.08		1000000141	62.0515	214.538	933.806		1000000001	142.366	218.395	1176.25
1000000002	322.047	334.88	-80.7913		1000000006	234.194	220.213	-1029.29		1000000141	61.1848	214.04	933.054		1000000001	143.496	219.815	1181.94
1000000002	320.795	334.827	-81.4559		1000000006	232.798	221.069	-1029.93		1000000141	62.153	214.607	933.834		1000000001	143.187	219.465	1181.26
1000000002	320.088	335.068	-81.0795		1000000006	231.877	221.87	-1029.59		1000000141	60.8492	214.339	934.559		1000000001	143.491	218.759	1180.63
1000000002	319.675	334.339	-80.9112		1000000006	231.654	222.143	-1029.25		1000000141	61.5266	214.094	933.656		1000000001	143.423	219.108	1181.21
1000000002	319.797	334.361	-81.2206		1000000006	231.302	221.738	-1030.09		1000000141	60.8515	212.944	933.743		1000000001	142.723	218.663	1179.8
1000000002	319.623	334.222	-79.895		1000000006	231.13	221.109	-1028.8		1000000141	60.1287	212.56	932.186		1000000001	142.789	218.957	1177.19
1000000002	319.088	333.801	-79.7433		1000000006	231.639	221.438	-1028.2		1000000141	60.317	211.079	932.863		1000000001	143.277	219.603	1176.76
1000000002	319.058	333.314	-80.8832		1000000006	231.575	220.839	-1026.81		1000000141	59.1708	210.082	927.911		1000000001	142.706	219.019	1177.67
1000000002	318.986	333.422	-80.6274		1000000006	231.814	220.969	-1028.25		1000000141	59.4077	210.152	929.915		1000000001	142.336	218.472	1177.79
1000000002	318.65	334.257	-80.9777		1000000006	231.26	220.091	-1029.53		1000000141	59.3189	209.317	929.401		1000000001	142.548	218.516	1181.14
1000000002	319.47	333.399	-81.5914		1000000006	230.114	217.596	-1024.64		1000000141	59.3929	208.613	928.745		1000000001	142.009	218.291	1181.57
1000000002	319.94	333.21	-81.1302		1000000006	229.666	216.065	-1025.68		1000000141	59.2918	208.483	928.289		1000000001	142.712	218.739	1180.97
1000000002	319.388	333.248	-81.2233		1000000006	227.449	214.632	-1030.25		1000000141	59.3841	208.739	930.757		1000000001	142.728	219.183	1181.51
1000000002	321.088	333.235	-78.7341		1000000006	225.805	212.02	-1027.95		1000000141	57.5959	207.202	928.612		1000000001	142.38	219.092	1181.56
1000000002	321.117	333.272	-78.0883		1000000006	226.279	209.45	-1026.21		1000000141	57.2791	207.183	927.752		1000000001	142.444	218.274	1176.42
1000000002	320.901	333.376	-82.4863		1000000006	225.526	209.537	-1026.65		1000000141	58.1893	208.757	928.072		1000000001	142.898	218.971	1180.77
1000000002	321.387	332.942	-83.0858		1000000006	222.491	209.06	-1022.69		1000000141	57.4934	210.219	928.741		1000000001	142.45	218.092	1181.18
1000000002	320.355	334.071	-79.6914		1000000006	218.998	209.555	-1019.08		1000000189	329.692	292.474	923.549		1000000001	142.723	219.479	1180.57
1000000002	320.941	334.276	-77.3996		1000000007	31.9299	311.342	-1028.15		1000000189	327.548	293.03	922.68		1000000001	142.731	218.945	1179.86
1000000002	319.466	334.295	-82.1249		1000000007	31.5638	312.189	-1030.01		1000000189	325.575	293.412	921.494		1000000001	142.712	218.571	1179.85
1000000002	319.64	334.132	-81.9984		1000000007	30.3674	312.368	-1030.29		1000000189	323.492	295.776	920.607		1000000001	141.898	218.194	1181.09
1000000002	320.004	334.238	-81.9964		1000000007	30.2791	312.507	-1030.14		1000000189	320.463	296.43	918.77		1000000001	141.947	219.161	1181.2
1000000002	319.651	334.375	-81.9791		1000000007	29.1825	311.41	-1033.21		1000000189	320.049	297.462	919.466		1000000001	142.033	218.925	1180.82
1000000002	319.232	334.259	-81.9376		1000000007	28.6958	312.248	-1033.31		1000000189	320.102	298.173	918.986		1000000001	142.277	217.697	1180.55
1000000002	318.981	334.834	-83.031		1000000007	26.9699	313.595	-1034.15		1000000189	320.705	297.68	918.361		1000000001	142.263	217.104	1178.41
1000000002	318.933	334.239	-82.3224		1000000007	25.7843	313.556	-1035.17		1000000189	320.266	296.846	919.425		1000000001	142.137	216.83	1182.05
1000000002	319.184	334.875	-78.3036		1000000007	25.0325	313.064	-1034.52		1000000189	320.398	297.401	918.376		1000000001	141.713	217.423	1178.39
1000000002	318.878	334.718	-81.9571		1000000007	24.8899	313.135	-1034.59		1000000189	320.131	297.131	918.149		1000000001	142.136	216.457	1177.02
1000000002	318.501	334.428	-81.6847		1000000007	25.2802	313.104	-1034.39		1000000189	319.879	297.499	918.684		1000000001	142.013	217.466	1178.13
1000000002	319.031	333.966	-81.73		1000000007	23.5831	311.126	-1033.82		1000000189	321.064	295.543	918.589		1000000001	141.119	217.261	1178.43
1000000002	319.033	333.879	-81.3118		1000000007	22.8231	310.64	-1033.63		1000000189	320.666	293.658	918.44		1000000001	141.516	218.51	1179.17
1000000002	318.315	334.274	-81.5273		1000000007	22.555	310.168	-1033.81		1000000189	321.431	293.123	919.54		1000000001	141.788	216.986	1177.52
1000000002	318.971	333.614	-82.1577		1000000007	21.5602	309.937	-1033.67		1000000189	323.382	289.086	921.546		1000000001	141.453	217.192	1181.71
1000000002	319.533	333.038	-82.2343		1000000007	20.0094	310.585	-1032.75		1000000189	324.524	284.125	923.361		1000000001	141.443	217.06	1181.98
1000000002	318.917	333.461	-81.9503		1000000007	19.9275	311.326	-1031.61		1000000189	325.901	283.066	923.421		1000000001	141.761	217.699	1181.55
1000000002	319.439	332.839	-81.7795		1000000007	20.3335	311.458	-1031.24		1000000189	324.786	281.153	923.955		1000000001	141.56	216.708	1182.31
1000000002	320.51	333.132	-81.4412		1000000007	17.7386	311.876	-1030.3		1000000189	323.075	275.059	924.66		1000000001	142.17	217.192	1181.64
1000000002	320.175	333.498	-81.5929		1000000007	18.6398	311.807	-1030.19		1000000189	320.957	273.372	925.632		1000000001	142	217.794	1178.88
1000000002	321.025	332.606	-81.0011		1000000007	15.5938	310.019	-1028.1		1000000189	321.59	273.661	924.192		1000000001	142.253	218.004	1180.95
1000000002	321.555	332.327	-80.803		1000000007	14.7815	310.251	-1027.71		1000000189	320.258	269.117	926.924		1000000001	141.865	217.833	1180.71
1000000002	322.09	332.49	-81.495		1000000034	127.754	183.339	-1016.38		1000000189	318.855	268.805	927.361		1000000001	142.386	218.301	1180.74
1000000002	323.548	333.222	-80.6132		1000000034	127.122	183.437	-1016.22		1000000296	29.9168	109.888	924.387		1000000001	142.185	217.754	1178.95
1000000002	325.479	333.749	-81.2561		1000000034	127.046	184.466	-1016.02		1000000296	29.9601	110.647	926.887		1000000001	142.173	217.836	1178.23
1000000002	325.151	333.569	-80.1622		1000000034	125.934	184.872	-1016.39		1000000296	27.0609	107.347	925.643		1000000001	142.332	217.853	1181.49
1000000002	325.021	333.477	-80.7839		1000000034	126.129	185.326	-1016.13		1000000296	28.5222	108.711	924.062		1000000001	142.043	217.606	1181.48
1000000002	324.773	333.856	-79.2191		1000000034	126.663	184.483	-1015.81		1000000296	29.5268	109.45	923.268		1000000001	141.859	217.348	1180.89
1000000002	325.586	333.944	-81.3925		1000000034	126.494	184.777	-1015.48		1000000296	28.4728	108.158	923.563		1000000001	141.998	217.409	1182
1000000002	324.384	333.411	-76.5914		1000000034	126.237	184.205	-1014.34		1000000296	29.0628	111.138	926.12		1000000001	142.094	217.335	1181.22
1000000002	323.354	333.726	-81.4576		1000000034	126.298	184.672	-1013.74		1000000296	27.7469	109.3	926.768		1000000001	141.839	216.722	1177
1000000002	324.44	334.076	-77.8815		1000000034	125.599	185.072	-1013.93		1000000296	28.3704	108.92	926.575		1000000001	142.205	216.865	1177.81
1000000002	325.668	334.222	-77.9025		1000000034	125.237	185.138	-1013.1		1000000296	29.5773	110.523	927.011		1000000001	141.91	216.826	1176.42
1000000002	325.138	333.741	-77.9754		1000000034	125.066	185.614	-1012.88		1000000296	29.5265	111.397	927.478		1000000001	142.181	217.366	1177.5
1000000002	325.048	333.846	-77.9048		1000000034	124.808	186.26	-1012.74		1000000296	28.9678	111.059	927.1		1000000001	142.051	218.293	1180.16
1000000002	325.068	334.095	-77.7256		1000000034	124.901	185.894	-1012.28		1000000296	29.6988	111.063	927.022		1000000001	142.696	216.838	1178.04
1000000002	325.694	334.381	-77.9788		1000000034	124.657	185.708	-1013.78		1000000296	29.3503	110.878	925.476		1000000001	142.416	217.836	1181.54
1000000002	325.025	334.066	-77.8327		1000000034	125.379	185.382	-1013.96		1000000296	29.7352	111.512	927.186		1000000001	141.883	218.293	1180.5
1000000002	324.237	334.217	-79.2573		1000000034	124.872	184.995	-1013.33		1000000296	30.592	111.713	922.648		1000000001	142.463	218.227	1180.84
1000000002	325.199	333.638	-77.0796		1000000034	123.711	185.177	-1013.36		1000000296	29.7751	111.256	923.469		1000000001	142.51	217.866	1180.3
1000000002	325.284	333.804	-76.9414		1000000034	124.67	185.523	-1015.17		1000000296	30.0854	111.01	922.24		1000000001	142.227	217.595	1181.74
1000000002	324.958	333.733	-77.2597		1000000034	124.306	185.25	-1014.97		1000000296	30.1493	110.836	923.012		1000000001	142.17	217.323	1181.54
1000000002	324.025	332.901	-77.0994		1000000034	124.618	184.651	-1013.41		1000000296	30.3334	112.036	923.389		1000000001	142.042	217.895	1180.53
1000000002	325.463	333.497	-77.07		1000000034	125.105	185.329	-1014.58		1000000296	30.4496	113.171	926.195		1000000001	141.897	218.184	1181.18
1000000002	323.144	331.797	-78.4785		1000000034	124.809	185.951	-1012.88		1000000296	30.9379	111.915	924.52		1000000001	143.199	218.6	1185.48
1000000002	324.831	333.174	-77.3552		1000000034	123.499	186.624	-1015.31		1000000296	30.6894	111.744	923.978		1000000002	49.6348	83.1995	1210.89
1000000002	325.192	334.005	-77.7065		1000000034	122.643	187.522	-1013.99		1000000296	30.1776	112.514	925.38		1000000002	49.8434	83.214	1210.96
1000000002	324.846	333.945	-77.7295		1000000034	122.19	188.083	-1011.85		1000000296	29.6814	111.45	923.474		1000000002	48.7201	82.7512	1210.87
1000000002	324.982	334.215	-77.2862		1000000034	121.536	187.812	-1013.1		1000000296	29.9359	112.406	926.966		1000000002	48.7866	83.1624	1210.9
1000000002	323.869	333.095	-77.6075		1000000034	121.437	187.915	-1015.09		1000000296	30.5288	112.717	925.999		1000000002	48.883	82.8459	1210.85
1000000002	324.189	333.725	-77.4605		1000000034	122.208	187.784	-1015.98		1000000296	30.4069	110.907	923.458		1000000002	48.9415	82.6195	1210.87
1000000002	324.329	333.853	-76.8196		1000000034	119.898	189.663	-1015.18		1000000296	31.1046	111.329	924.098		1000000002	49.1187	83.5268	1210.83
1000000002	325.109	334.202	-81.3452		1000000159	103.468	158.05	-1016.27		1000000296	30.293	113.442	926.873		1000000002	49.2421	83.3669	1210.95
1000000002	324.091	334.518	-81.4273		1000000159	104.49	158.469	-1016.29		1000000296	30.1448	113.952	927.272		1000000002	48.8784	82.4441	1210.93
1000000002	323.556	333.459	-80.988		1000000159	104.017	158.722	-1015.88		1000000296	30.9675	112.99	926.902		1000000002	48.5395	82.7202	1210.98
1000000002	322.511	332.475	-81.1897		1000000159	103.809	158.562	-1016.28		1000000296	30.6385	112.832	927.192		1000000002	48.702	82.9889	1210.86
1000000002	322.404	332.332	-81.4996		1000000159	104.844	159.288	-1017.09		1000000296	31.4255	113.203	926.049		1000000002	48.0744	83.3188	1210.88
1000000002	322.114	331.695	-77.1217		1000000159	105.283	159.836	-1015.07		1000000296	31.2467	113.738	926.991		1000000002	46.565	82.1008	1210.9
1000000002	321.956	331.128	-77.7169		1000000159	105.228	160.456	-1013.83		1000000296	29.7459	113.783	927.502		1000000002	45.1867	81.8321	1210.51
1000000002	321.892	329.404	-78.164		1000000159	105.116	160.696	-1016.04		1000000296	30.3468	113.22	923.143		1000000002	46.7827	82.1747	1210.81
1000000002	321.838	329.244	-76.7651		1000000159	105.477	161.637	-1012.69		1000000296	31.3169	113.57	922.588		1000000002	47.6219	82.0742	1210.86
1000000002	322.391	329.301	-77.1968		1000000159	105.036	161.486	-1016.33		1000000296	30.6847	113.696	920.891		1000000002	48.1283	82.914	1210.96
1000000002	322.335	329.016	-80.961		1000000159	104.723	161.27	-1016.05		1000000296	31.0485	112.843	923.522		1000000002	46.9147	82.6974	1210.87
1000000002	321.601	327.542	-80.9946		1000000159	104.889	162.552	-1014.24		1000000296	30.5687	113.268	923.465		1000000002	46.7395	83.3952	1210.92
1000000002	321.303	328.286	-81.695		1000000159	104.897	163.168	-1014.12		1000000296	31.113	113.451	922.994		1000000002	43.5878	82.5875	1210.68
1000000002	321.323	327.882	-77.7588		1000000159	105.297	162.028	-1016.88		1000000296	31.182	113.129	922.745		1000000002	43.2651	82.1098	1210.85
1000000002	321.282	327.635	-77.1591		1000000159	104.231	163.821	-1016.48		1000000296	30.7722	113.805	926.235		1000000002	44.3457	82.2054	1210.57
1000000002	322.06	327.806	-80.9354		1000000159	103.557	163.553	-1013.7		1000000296	30.9898	112.857	923.408		1000000002	43.3437	82.0631	1210.85
1000000002	321.784	328.034	-81.489		1000000159	102.982	160.64	-1016.86		1000000296	31.3029	113.844	924.447		1000000002	42.3452	82.1479	1210.47
1000000002	321.594	327.992	-80.6246		1000000159	102.612	160.014	-1018.72		1000000296	30.5502	113.526	927.01		1000000002	43.238	81.3179	1210.64
1000000002	321.713	328.133	-81.1062		1000000159	103.66	159.795	-1019.91		1000000296	30.4544	113.933	925.711		1000000002	41.9698	81.3173	1210.8
1000000002	321.515	328.141	-77.1206		1000000269	281.119	239.787	-1037.55		1000000296	31.098	114.362	925.759		1000000002	42.3172	81.8883	1210.94
1000000002	321.226	327.342	-77.4607		1000000269	282.451	240.365	-1036.64		1000000296	31.3993	114.169	925.956		1000000003	278.16	164.724	1200.99
1000000002	321.045	326.809	-82.3382		1000000269	282.348	240.606	-1039.16		1000000296	30.5623	114.396	927.727		1000000003	277.943	164.423	1200.01
1000000002	320.858	326.259	-77.3038		1000000269	282.88	240.331	-1040.02		1000000296	30.6584	114.322	927.585		1000000003	277.88	164.679	1198.4
1000000002	320.481	326.152	-81.8691		1000000269	282.49	240.151	-1037.21		1000000296	31.0195	113.835	927.309		1000000003	277.732	164.389	1198.38
1000000002	320.127	326.816	-81.8964		1000000269	280.38	239.04	-1036.71		1000000296	30.8754	113.189	927.493		1000000003	278.087	164.338	1199.67
1000000002	320.018	327.334	-82.0573		1000000269	279.181	240.792	-1036.36		1000000296	31.2258	113.28	927.484		1000000003	277.444	163.938	1198.67
1000000002	319.988	327.41	-81.4076		1000000269	279.555	240.636	-1038.08		1000000296	31.7345	113.23	927.3		1000000003	277.614	163.92	1196.17
1000000002	319.822	326.923	-81.5295		1000000269	280.179	240.203	-1040.07		1000000296	31.9515	114.059	927.376		1000000003	277.798	164.535	1196.96
1000000002	319.925	326.681	-82.4277		1000000269	279.623	240.039	-1038.28		1000000296	30.4915	114.272	927.586		1000000003	277.862	163.477	1199.67
1000000002	319.962	325.961	-81.2695		1000000269	279.214	237.975	-1037.46		1000000296	30.5937	114.462	927.232		1000000003	277.902	163.767	1198.89
1000000002	320.286	326.534	-78.6889		1000000269	278.813	238.59	-1037.42		1000000296	31.2262	114.975	927.263		1000000003	277.386	163.99	1196.91
1000000002	320.407	326.529	-82.7616		1000000269	279.064	237.737	-1038.04		1000000296	30.8396	115.867	927.352		1000000003	277.452	164.169	1197.38
1000000002	320.827	325.487	-81.8484		1000000269	279.937	237.802	-1037		1000000296	31.4693	114.788	927.758		1000000003	277.523	164.069	1200.2
1000000002	321.051	324.948	-81.0195		1000000269	278.937	237.936	-1039.7		1000000296	31.1935	114.338	926.963		1000000003	277.88	164.376	1199.43
1000000002	320.587	324.814	-81.4533		1000000269	278.858	237.498	-1040.97		1000000296	31.1922	113.658	927.494		1000000003	277.642	163.552	1198.75
1000000002	319.825	324.054	-81.8163		1000000269	279.012	237.347	-1039.67		1000000296	31.5354	114.41	927.464		1000000003	276.968	163.322	1200.13
1000000002	319.276	323.95	-82.0306		1000000269	279.179	238.034	-1038.19		1000000296	30.9708	114.51	927.604		1000000003	277.525	163.858	1201.25
1000000002	318.477	323.324	-84.6699		1000000269	278.248	238.863	-1037.49		1000000296	31.1831	114.672	927.881		1000000003	277.175	163.825	1198.59
1000000002	316.139	320.414	-82.8055		1000000269	278.395	238.768	-1036.49		1000000296	31.0593	114.696	927.742		1000000003	277.547	164.247	1198.13
1000000002	316.138	319.551	-83.5008		1000000269	277.789	240.625	-1035.41		1000000296	30.8362	114.38	927.712		1000000003	277.988	164.107	1200.96
1000000002	316.883	320.194	-83.4424		1000000269	277.834	241.111	-1037.33		1000000296	30.8932	114.942	928.212		1000000003	277.74	163.976	1198.73
1000000002	318.354	323.112	-81.8589		1000000269	277.098	242.146	-1035.55		1000000296	31.3777	115.151	927.754		1000000003	277.602	164.122	1196.99
1000000002	317.808	322.387	-81.6085		1000000269	277.625	241.194	-1039.65		1000000296	31.3085	114.912	927.411		1000000003	277.309	164.131	1199.21
1000000002	318.96	323.13	-81.9198		1000000269	276.633	243.677	-1039.8		1000000296	30.9449	113.98	927.698		1000000003	277.114	164.129	1199.51
1000000002	318.934	323.592	-81.9855		1000000269	276.39	244.952	-1036.5		1000000296	31.4865	114.402	927.797		1000000003	276.745	164.058	1200.01
1000000002	319.581	323.505	-82.1897		1000000327	329.237	166.977	-1029.51		1000000296	30.9702	113.874	926.996		1000000003	277.34	164.833	1200.44
1000000002	318.67	322.778	-81.9847		1000000327	329.051	166.604	-1030.6		1000000296	31.5092	114.092	927.243		1000000003	276.905	164.762	1200.29
1000000002	320.538	323.663	-81.9572		1000000327	329.505	166.721	-1027.74		1000000296	31.2257	114.713	928.269		1000000003	277.459	164.528	1201.65
1000000002	320.348	324.692	-82.0119		1000000327	330	166.86	-1027.96		1000000296	31.0625	114.584	927.694		1000000003	276.683	164.865	1203.36
1000000002	320.878	325.252	-82.2194		1000000327	330.364	166.567	-1027.78		1000000296	31.1793	114.197	927.741		1000000003	277.642	164.979	1200.54
1000000002	321.295	325.669	-81.3101		1000000327	329.465	165.976	-1025.83		1000000296	31.2289	114.974	927.417		1000000003	277.329	164.435	1199.39
1000000002	321.92	325.372	-81.1331		1000000327	328.569	165.407	-1030.46		1000000296	31.2049	113.618	928.069		1000000003	277.659	164.567	1198.74
1000000002	321.466	325.433	-81.1755		1000000327	329.02	164.705	-1028.11		1000000296	31.513	114.042	927.753		1000000003	277.481	164.628	1196.85
1000000002	321.2	325.115	-80.6499		1000000327	327.643	165.031	-1028.34		1000000296	31.0578	113.793	928.484		1000000003	277.507	164.059	1198.3
1000000002	321.615	325.604	-80.8812		1000000327	327.615	164.003	-1029.89		1000000296	31.5334	114.42	927.995		1000000003	277.577	164.37	1199.47
1000000002	321.494	326.149	-81.6856		1000000327	325.122	164.106	-1027.21		1000000296	31.4843	114.219	928.032		1000000003	277.318	164.828	1197.41
1000000002	321.809	326.479	-81.5173		1000000327	318.919	159.306	-1022.62		1000000296	31.2404	114.049	928.344		1000000003	277.706	164.205	1199.64
1000000002	321.722	327.077	-81.5478		1000000327	313.909	158.843	-1024.92		1000000296	30.963	113.911	929.019		1000000003	276.846	163.949	1197.79
1000000002	320.881	329.989	-81.5368		1000000327	311.581	159.23	-1023.49		1000000296	31.4198	113.918	928.668		1000000003	276.938	163.569	1201.09
1000000002	320.547	330.601	-81.3638		1000000327	311.427	159.478	-1023.62		1000000296	31.4456	114.313	929.576		1000000003	276.696	163.425	1199.46
1000000002	320.253	331.84	-81.0478		1000010000	303.631	158.204	-927.15		1000000296	30.6931	114.104	928.38		1000000003	276.801	163.487	1200.96
1000000002	319.552	332.891	-78.908		1000010000	304.011	157.575	-924.819		1000000296	31.6035	113.652	929.149		1000000003	276.926	163.128	1200.58
1000000002	319.189	334.034	-81.4346		1000010000	303.931	157.925	-923.915		1000000296	31.5319	114.638	930.674		1000000003	276.974	163.267	1204.22
1000000002	318.987	333.411	-81.4947		1000010000	303.291	158.936	-923.915		1000000296	31.5991	114.522	929.518		1000000003	276.951	164.115	1202.34
1000000002	318.631	334.163	-81.3722		1000010000	303.307	159.652	-923.241		1000000296	31.8659	114.138	928.819		1000000003	277.129	163.916	1197.83
1000000002	318.002	334.724	-80.8115		1000010000	302.701	160.035	-923.318		1000000296	30.5138	113.973	930.901		1000000003	277.641	164.304	1198.16
1000000002	317.639	334.412	-80.3115		1000010000	302.857	159.942	-927.168		1000000296	30.5738	113.127	928.751		1000000003	277.265	163.441	1200.85
1000000002	318.485	334.621	-80.2457		1000010000	302.843	160.098	-927.093		1000000296	30.3486	113.988	931.436		1000000003	277.369	163.847	1202.06
1000000002	319.196	334.864	-78.4741		1000010000	303.75	158.808	-923.406		1000000296	30.0328	113.386	931.068		1000000003	277.154	164.025	1203.67
1000000002	318.844	334.775	-78.1081		1000010000	303.552	158.064	-925.492		1000000296	30.7212	114.529	929.806		1000000003	277.365	164.639	1203.4
1000000002	318.757	334.752	-78.1456		1000010000	303.367	158.649	-923.513		1000000296	30.4284	114.43	930.985		1000000003	277.601	163.818	1200.15
1000000002	318.776	334.982	-78.0082		1000010000	303.959	157.779	-925.238		1000000296	30.5642	114.953	930.203		1000000003	277.424	164.345	1202.47
1000000002	318.028	335.042	-77.5476		1000010000	302.451	159.506	-926.609		1000000296	30.8877	114.562	931.643		1000000003	277.385	164.348	1201.1
1000000002	318.087	335.53	-81.4151		1000010000	303.06	158.653	-923.822		1000000296	30.6282	114.147	930.97		1000000003	277.478	164.034	1197.92
1000000002	317.923	335.086	-80.9378		1000010000	303.029	159.238	-924.335		1000000296	30.2696	114.015	932.126		1000000003	277.645	164.214	1200.96
1000000002	318.623	335.422	-78.3523		1000010000	302.187	158.979	-923.876		1000000296	30.4731	114.531	932.215		1000000003	277.75	163.833	1201.44
1000000002	318.407	335.449	-77.3232		1000010000	302.711	158.868	-923.884		1000000296	30.2842	114.846	931.814		1000000003	277.776	164.329	1203.44
1000000002	318.948	335.605	-77.9104		1000010000	302.482	159.381	-923.341		1000000296	30.5524	113.822	932.592		1000000003	277.48	163.511	1203.66
1000000002	318.558	335.734	-81.9623		1000010000	301.922	159.589	-925.078		1000000296	30.5038	113.965	931.939		1000000003	277.831	163.661	1203.8
1000000002	318.831	335.435	-81.9036		1000010000	301.594	159.924	-925.621		1000000296	30.5628	114.65	931.79		1000000003	277.713	164.093	1202.75
1000000002	318.288	335.81	-81.7005		1000010000	301.085	161.658	-928.284		1000000296	29.7915	113.558	932.46		1000000003	277.832	163.545	1202.07
1000000002	318.762	335.301	-76.9386		1000010000	301.433	160.127	-923.548		1000000296	30.3728	114.725	931.807		1000000003	276.555	162.842	1204.6
1000000002	318.418	335.804	-81.4442		1000010000	300.921	160.791	-925.321		1000000296	30.2709	114.165	931.418		1000000003	276.854	162.153	1204.28
1000000002	317.977	335.927	-81.7211		1000010000	301.456	160.42	-927.328		1000000296	30.8814	114.721	932.204		1000000003	277.259	163.863	1201.23
1000000002	318.718	335.616	-77.4892		1000010000	300.787	159.436	-927.102		1000000296	30.0203	114.376	932.838		1000000003	277.101	163.841	1202.23
1000000002	318.005	336.066	-78.8951		1000010000	301.016	160.474	-925.224		1000000296	30.5715	115.253	932.761		1000000003	277.27	163.365	1202.94
1000000002	318.136	335.335	-80.977		1000010000	300.564	160.192	-924.323		1000000296	30.3375	114.389	932.563		1000000003	277.565	165.378	1197.7
1000000002	317.653	335.392	-77.9076		1000010000	300.322	160.079	-924.363		1000000296	30.2605	113.862	931.302		1000000003	277.767	164.119	1200.71
1000000002	317.628	335.453	-77.8279		1000010000	300.758	160.103	-924.391		1000000296	30.8996	114.944	932.776		1000000003	278.02	165.109	1198.14
1000000002	317.574	335.093	-77.0371		1000010000	300.772	160.334	-923.838		1000000296	30.3915	113.849	932.483		1000000003	277.346	163.833	1200.87
1000000002	317.73	335.422	-82.0406		1000010000	300.946	161.988	-923.66		1000000296	30.4058	114.874	932.626		1000000003	277.931	164.414	1199.3
1000000002	317.606	335.259	-81.6362		1000010000	300.886	161.464	-923.743		1000000296	30.1471	113.76	932.711		1000000003	277.692	163.603	1200.63
1000000002	318.081	335.823	-77.2618		1000010000	301.197	163.577	-928.641		1000000296	30.5326	114.253	931.981		1000000003	277.714	163.005	1204.22
1000000002	318.841	335.261	-77.1601		1000010000	300.968	162.078	-926.094		1000000296	29.6386	114.345	931.963		1000000003	277.063	163.103	1204.12
1000000002	318.514	335.069	-77.3015		1000010000	300.932	162.621	-922.965		1000000296	29.6688	114.743	932.619		1000000003	277.865	164.625	1202.4
1000000002	319.152	335.046	-82.0868		1000010000	301.654	162.926	-923.303		1000000296	30.4505	113.995	932.591		1000000003	277.12	163.767	1202.41
1000000002	317.902	334.827	-81.2446		1000010000	300.938	162.691	-928.193		1000000296	29.5393	113.981	932.52		1000000003	277.271	164.659	1203.2
1000000002	317.584	335.489	-81.5449		1000010000	301.269	162.274	-923.544		1000000296	30.2103	114.367	932.833		1000000003	277.539	164.528	1201.83
1000000002	318.109	335.576	-80.9385		1000010000	302.166	161.117	-925.738		1000000296	29.2872	113.592	933.031		1000000003	277.437	164.161	1202.53
1000000002	318.111	335.204	-81.0684		1000010000	299.971	162.028	-925.624		1000000296	29.6494	113.97	932.813		1000000003	276.983	163.218	1203.9
1000000002	318.289	335.413	-81.5648		1000010000	300.062	160.748	-925.37		1000000296	29.6251	115.01	932.848		1000000003	276.624	162.953	1204.56
1000000002	318.426	334.898	-81.6603		1000010000	300.614	161.048	-923.197		1000000296	30.4018	113.956	931.891		1000000003	276.085	162.712	1202.95
1000000002	318.294	335.477	-80.5395		1000010000	300.123	160.669	-926.552		1000000296	29.8827	114.117	931.832		1000000003	276.585	162.634	1204.6
1000000002	318.675	335.332	-78.8009		1000010000	300.099	161.053	-922.167		1000000296	29.9706	114.29	932.634		1000000003	277.621	163.73	1205.78
1000000002	318.209	335.411	-78.1971		1000010000	300.948	161.113	-922.887		1000000296	29.7765	113.776	931.223		1000000003	276.463	162.497	1203.89
1000000002	317.848	335.254	-77.8732		1000010000	300.558	161.568	-923.309		1000000296	30.2241	114.618	932.66		1000000003	275.927	162.113	1204.04
1000000002	318.143	335.444	-77.5175		1000010000	300.163	161.057	-924.762		1000000296	30.2637	114.661	932.409		1000000003	277.444	163.991	1203.07
1000000002	318.601	335.453	-78.0518		1000010000	300.106	159.813	-920.763		1000000296	30.7422	113.515	932.447		1000000003	278.04	163.784	1202.1
1000000039	61.5039	49.1036	-47.05		1000010000	299.773	159.45	-920.655		1000000296	30.9583	113.533	932.504		1000000003	277.547	163.023	1204.85
1000000039	61.2432	49.0439	-47.05		1000010000	299.977	160.043	-920.006		1000000296	30.2853	114.127	932.323		1000000003	277.284	162.561	1204.49
1000000039	61.2324	50.1847	-47.05		1000010000	299.299	159.081	-922.981		1000000296	30.7409	114.054	933.186		1000000003	277.072	163.104	1204.41
1000000039	62.1377	50.5168	-50.6212		1000010000	299.679	158.823	-920.133		1000000296	30.5392	114.23	932.961		1000000003	277.895	164.187	1198.8
1000000039	61.8683	50.7896	-51.2885		1000010000	299.411	158.954	-920.49		1000000296	30.7697	114.643	932.266		1000000003	276.177	162.874	1199.59
1000000039	62.8389	51.4948	-57.0271		1000010000	299.665	159.006	-924.799		1000000296	31.344	113.789	931.985		1000000003	276.813	163.135	1204.57
1000000039	63.2504	51.771	-56.6091		1000010000	299.543	159.044	-924.031		1000000296	30.8608	115.06	931.965		1000000003	276.548	162.8	1199.94
1000000039	62.8093	50.7822	-56.6716		1000010001	165.11	237.116	-938.55		1000000296	31.1537	114.009	932.594		1000000003	276.49	162.488	1204.2
1000000039	62.5386	50.3036	-56.6811		1000010001	166.972	237.924	-938.679		1000000296	30.0408	114.15	932.587		1000000003	276.261	162.045	1205.18
1000000039	65.0154	51.5219	-56.6551		1000010001	163.986	236.833	-935.415		1000000296	29.9679	113.927	932.895		1000000003	277.309	162.899	1204.87
1000000039	64.8791	51.3143	-55.9936		1000010001	167.822	238.313	-938.727		1000000296	30.6736	113.328	933.143		1000000003	277.651	163.319	1204.77
1000000039	63.011	51.7221	-56.1486		1000010001	165.384	237.134	-938.349		1000000296	29.9889	114.08	933.104		1000000003	276.33	162.212	1204.68
1000000039	63.2324	51.6264	-56.2817		1000010001	167.687	238.109	-938.102		1000000296	30.9958	113.489	932.894		1000000003	276.531	162.483	1204.44
1000000039	62.9224	51.7559	-56.0538		1000010001	169.372	239.036	-942.94		1000000296	31.0473	114.057	932.678		1000000003	277.806	163.369	1204.67
1000000039	61.2641	50.3128	-53.6138		1000010001	166.696	237.772	-939.022		1000000296	30.5952	115.046	932.792		1000000003	277.017	162.918	1204.4
1000000039	64.1169	51.8682	-54.8013		1000010001	164.475	236.682	-934.266		1000000296	29.9093	114.481	932.477		1000000003	277.778	163.696	1202.12
1000000039	64.9684	52.4461	-54.0318		1000010001	168.444	238.352	-939.937		1000000296	30.034	114.099	932.546		1000000003	277.816	163.552	1201.68
1000000039	64.7561	52.2217	-54.7427		1000010001	166.853	237.156	-938.93		1000000296	31.2038	113.621	932.805		1000000003	277.434	162.529	1204.05
1000000039	65.3046	51.6741	-53.0048		1000010001	167.553	237.954	-943.317		1000000296	30.0352	114.557	933.107		1000000003	278.122	163.607	1204.27
1000000039	65.2769	52.3144	-53.0282		1000010001	166.924	236.827	-939.031		1000000296	30.2791	113.821	932.788		1000000003	276.779	162.683	1204.59
1000000039	64.9421	51.6858	-57.5199		1000010001	168.028	237.895	-938.997		1000000296	30.2488	114.06	933.019		1000000003	276.788	161.606	1205.04
1000000039	64.877	51.4164	-53.7636		1000010001	168.297	237.692	-939.057		1000000296	30.0226	113.823	932.625		1000000003	276.328	161.528	1205.16
1000000039	65.1658	51.3946	-52.8624		1000010001	166.056	237.3	-938.282		1000000296	30.3161	113.813	932.622		1000000003	277.78	163.054	1204.66
1000000039	65.9255	51.9581	-52.6544		1000010001	164.198	236.25	-938.561		1000000296	30.4731	114.196	932.411		1000000003	277.345	162.638	1205.22
1000000039	65.0112	51.4114	-52.8461		1000010001	165.737	236.912	-939.259		1000000296	30.0542	114.087	933.098		1000000003	277.741	162.924	1204.15
1000000039	64.7507	51.2964	-52.8941		1000010001	166.765	238.236	-939.206		1000000296	30.4167	114.223	933.049		1000000003	277.953	164.544	1199.81
1000000039	66.5156	51.6648	-52.7299		1000010001	165.027	236.593	-939.021		1000000296	30.5803	113.934	928.508		1000000003	278.387	165.022	1197.41
1000000039	65.15	52.1788	-57.6309		1000010001	166.148	236.914	-938.886		1000000296	30.9634	114.655	928.004		1000000003	278.256	163.002	1200.12
1000000039	66.317	51.4455	-57.6248		1000010001	166.843	237.11	-939.042		1000000296	30.9294	114.958	933.106		1000000003	277.988	163.075	1199.81
1000000039	65.3189	51.6418	-57.4639		1000010001	164.688	236.935	-938.945		1000000296	30.8748	114.175	929.02		1000000003	277.795	163.829	1203.43
1000000039	65.788	51.6307	-57.61		1000010001	164.766	236.344	-939.109		1000000296	30.4821	114.092	933.316		1000000003	278.272	164.216	1200.42
1000000039	65.489	52.1689	-57.9164		1000010001	163.265	234.67	-935.939		1000000296	29.6236	113.139	934.64		1000000003	278.801	163.217	1202.59
1000000039	66.704	52.175	-57.233		1000010001	166.061	236.75	-939.388		1000000296	30.8966	112.7	928.156		1000000003	278.17	163.221	1204.03
1000000039	65.3685	52.4622	-57.3573		1000010001	165.229	237.545	-939.011		1000000296	30.5808	112.473	929.175		1000000003	278.289	163.185	1204.16
1000000039	66.9413	52.0654	-57.5159		1000010001	165.668	237.837	-938.994		1000000296	31.1052	113.433	928.233		1000000003	277.226	162.18	1204.72
1000000039	65.7758	51.9882	-57.3335		1000010001	168.586	239.034	-939.755		1000000296	30.2154	113.223	928.064		1000000003	278.371	164.126	1201.75
1000000039	67.3566	51.7325	-57.6196		1000010001	167.3	238.266	-938.808		1000000296	30.5381	114.083	933.796		1000000003	278.494	163.335	1201.95
1000000039	66.3341	51.1106	-57.5355		1000010001	167.136	238.319	-938.731		1000000296	29.5688	114.345	934.47		1000000003	277.34	162.718	1204.35
1000000039	66.673	52.5832	-57.4126		1000010001	169.766	239.699	-939.062		1000000329	287.495	247.32	925.667		1000000003	277.047	161.841	1204.41
1000000039	65.9042	51.763	-57.5324		1000010001	168.518	239.014	-939.2		1000000329	288.607	247.827	926.216		1000000003	276.698	161.903	1204.81
1000000039	66.1934	51.644	-57.3293		1000010001	171.135	240.562	-938.998		1000000329	290.46	250.939	923.474		1000000003	277.387	162.642	1204.19
1000000039	66.9883	51.7846	-57.6333		1000010001	170.079	239.768	-942.882		1000000329	290.541	251.914	923.543		1000000003	278.08	163.821	1202.51
1000000039	69.1121	51.6251	-57.5874		1000010001	170.783	240.258	-944.122		1000000329	290.531	252.136	923.431		1000000003	277.876	162.545	1203.86
1000000039	66.453	51.9494	-57.5589		1000010001	176.012	243.162	-943.451		1000000329	291.634	252.837	922.401		1000000003	278.565	163.666	1197.57
1000000039	70.6603	53.3363	-57.785		1000010001	179.828	244.251	-942.824		1000000329	291.804	253.035	922.643		1000000003	276.894	161.483	1205.35
1000000039	65.6928	50.6502	-57.716		1000010001	177.999	246.42	-939.053		1000000329	291.01	253.779	921.226		1000000003	276.807	161.67	1205
1000000039	65.5185	51.6461	-57.7843		1000010001	179.462	242.842	-942.994		1000000329	290.319	253.8	921.325		1000000003	277.824	163.022	1201.28
1000000198	257.971	275.988	-65.8979		1000010001	176.215	243.565	-938.863		1000000329	288.316	254.034	919.712		1000000003	278.007	162.469	1201.77
1000000198	259.907	277.894	-66.3242		1000010001	177.086	241.787	-944.123		1000000329	288.422	253.553	913.427		1000000003	278.107	162.615	1202.11
1000000198	261.614	280	-67.0804		1000010002	30.5541	284.56	-937.983		1000000329	288.253	253.356	910.674		1000000003	276.954	162.316	1204.85
1000000198	261.578	279.924	-67.8117		1000010002	30.001	284.285	-937.371		1000000329	287.601	253.274	909.789		1000000003	277.546	164.231	1203.17
1000000198	264.599	280.267	-70.6299		1000010002	29.941	284.169	-935.399		1000000329	287.326	251.983	909.378		1000000003	277.675	163.404	1200.81
1000000198	265.814	280.287	-71.4745		1000010002	30.2665	283.775	-934.288		1000000329	287.213	252.482	908.762		1000000003	277.791	163.6	1201.59
1000000198	266.982	280.375	-71.694		1000010002	30.1388	283.575	-933.538		1000000329	287.802	253.435	911.521		1000000003	277.147	163.77	1202.23
1000000198	267.319	280.586	-73.1255		1000010002	30.1856	283.687	-933.464		1000000329	287.19	253.618	911.058		1000000003	277.076	162.598	1204.47
1000000198	265.932	280.939	-79.2174		1000010002	30.1419	283.722	-939.407		1000000329	287.115	253.757	910.152		1000000003	277.504	163.306	1199.95
1000000198	265.379	280.35	-81.7637		1000010002	30.4558	284.128	-938.676		1000000329	287.52	254.248	912.534		1000000003	277.637	163.037	1203.2
1000000198	265.065	280.971	-77.7839		1000010002	30.7673	283.9	-934.107		1000000329	287.112	254.173	911.26		1000000003	277.601	162.789	1200.63
1000000198	265.303	281.186	-77.4797		1000010002	30.2608	283.898	-934.941		1000000329	287.03	254.032	910.22		1000000003	277.236	163.775	1200.62
1000000198	264.332	280.88	-81.8171		1000010002	29.9543	283.547	-933.668		1000000329	287.117	254.062	911.668		1000000003	277.122	163.598	1202.64
1000000198	264.094	280.398	-81.4675		1000010002	30.8937	283.792	-937.843		1000000329	286.803	254.207	909.968		1000000003	276.764	162.125	1203.22
1000000198	264.708	280.853	-81.3121		1000010002	30.746	282.777	-934.199		1000000329	287.52	254.871	912.597		1000000003	276.118	162.494	1204.87
1000000198	264.466	281.144	-81.6914		1000010002	30.6254	282.856	-933.626		1000000329	287.436	255.109	912.794		1000000003	276.768	162.371	1205.25
1000000198	264.082	280.765	-81.6907		1000010002	31.5736	283.311	-933.686		1000000329	288.211	255.659	913.236		1000000003	276.681	163.218	1204.72
1000000198	264.168	281.074	-82.4129		1000010002	31.7498	282.872	-934.251		1000000329	288.664	255.957	913.283		1000000003	276.955	162.763	1205.07
1000000198	261.748	279.851	-81.6465		1000010002	30.7959	282.891	-932.763		1000000329	288.152	255.804	914.37		1000000003	275.792	160.996	1205.41
1000000198	263.428	280.408	-78.226		1000010002	31.3051	282.696	-931.736		1000000329	288.638	255.216	913.492		1000000003	276.247	162.369	1205.1
1000000198	263.218	280.221	-81.9483		1000010002	31.2602	282.942	-932.378		1000000329	289.559	256.082	914.445		1000000003	276.245	163.096	1205.19
1000000198	263.406	280.3	-81.2741		1000010002	31.2791	282.908	-934.673		1000000329	288.699	255.826	913.459		1000000003	277.928	163.661	1202.8
1000000198	262.257	279.936	-81.3689		1000010002	31.6214	283.048	-934.605		1000000329	288.864	256.659	912.332		1000000003	276.145	162.814	1204.27
1000000198	261.481	280.031	-78.5349		1000010002	32.1401	282.576	-932.588		1000000329	287.658	259.703	917.403		1000000003	276.756	162.893	1202.32
1000000198	261.179	279.893	-77.5772		1000010002	31.8726	283.802	-934.611		1000000329	287.446	259.518	919.58		1000000003	276.693	162.995	1201.1
1000000198	259.816	279.472	-77.4373		1000010002	32.1514	282.823	-933.397		1000000329	288.344	260.664	922.074		1000000003	276.614	162.99	1207.79
1000000198	258.435	278.428	-76.2191		1000010002	32.1315	282.337	-933.491		1000000329	288.448	261.009	920.963		1000000003	277.291	163.31	1206.15
1000000198	258.101	278.556	-76.0318		1000010002	31.5418	282.57	-931.553		1000000329	289.485	261.804	922.286		1000000003	277.023	162.732	1206.39
1000000198	255.562	277.647	-77.3934		1000010002	31.4985	282.415	-931.761		1000000337	228.134	124.9	912.249		1000000003	276.784	161.686	1206.88
1000000198	255.24	277.993	-79.0179		1000010002	31.2534	282.43	-930.683		1000000337	227.414	124.613	912.764		1000000003	276.947	162.558	1208.78
1000000198	255.593	278.411	-77.5755		1000010002	31.5535	282.653	-929.386		1000000337	227.019	124.457	909.692		1000000003	277.953	163.517	1202.47
1000000198	254.681	277.992	-77.0664		1000010002	31.4909	282.529	-930.872		1000000337	228.155	125.442	911.797		1000000003	277.818	162.905	1202.31
1000000198	254.132	278.28	-77.9207		1000010002	31.6864	282.165	-930.775		1000000337	228.728	125.594	912.844		1000000003	277.944	163.07	1202.21
1000000198	256.265	277.448	-78.1384		1000010002	32.1086	282.091	-933.2		1000000337	228.625	125.871	913.094		1000000003	276.686	162.63	1204.24
1000000198	253.441	278.052	-79.9954		1000010002	32.3836	283.014	-936.748		1000000337	227.867	124.855	912.033		1000000003	276.437	161.979	1204.75
1000000198	252.335	278.73	-81.4542		1000010002	31.2835	282.266	-930.34		1000000337	229.182	125.62	908.31		1000000003	278.177	163.86	1203.01
1000000198	253.741	277.556	-80.7862		1000010002	32.4793	282.225	-931.791		1000000337	230.857	125.256	908.715		1000000003	278.384	164.059	1206.78
1000000198	252.604	278.209	-81.3164		1000010002	32.0092	282.792	-935.129		1000000337	230.627	125.14	910.496		1000000003	276.632	161.632	1205.28
1000000198	252.86	278.404	-78.9869		1000010002	32.1833	282.816	-933.116		1000000337	230.21	125.912	908.048		1000000003	278.127	163.502	1205.32
1000000198	253.787	279.209	-82.9009		1000010002	32.4612	282.657	-933.419		1000000337	229.503	127.092	908.058		1000000003	277.685	163.268	1204.86
1000000198	252.835	278.061	-77.0764		1000010002	31.648	282.964	-935.465		1000000337	229.092	127.972	908.06		1000000003	277.562	162.76	1204.98
1000000198	253.757	278.77	-84.5902		1000010002	32.6003	283.334	-932.906		1000000337	229.54	127.413	909.624		1000000003	276.822	161.955	1205.11
1000000198	252.835	278.691	-81.5573		1000010002	31.8981	282.677	-936.45		1000000337	228.648	126.195	909.376		1000000003	276.142	162.11	1204.66
1000000198	252.715	278.761	-80.9165		1000010002	32.1974	283.537	-930.573		1000000337	228.3	126.506	909.562		1000000003	276.712	161.767	1204.6
1000000198	253.907	278.644	-79.1099		1000010002	33.5386	283.291	-933.424		1000000337	227.995	125.704	909.106		1000000003	276.328	161.795	1204.74
1000000198	252.683	279.191	-80.3012		1000010002	32.2255	283.716	-933.333		1000000337	228.021	125.608	908.785		1000000003	276.291	162.788	1204.25
1000000198	253.207	279.318	-79.1535		1000010002	31.8646	283.266	-933.266		1000000337	227.471	125.825	908.512		1000000003	275.509	161.316	1205.05
1000000198	254.446	278.595	-78.5721		1000010002	31.6577	282.913	-932.952		1000000337	227.85	126.535	905.176		1000000003	275.839	162.253	1205.06
1000000198	253.634	279.04	-78.512		1000010002	31.5111	283.234	-934.111		1000000337	227.311	126.206	909.263		1000000003	275.671	162.288	1205.27
1000000198	253.911	277.523	-78.2771		1000010002	31.8859	283.179	-933.603		1000000337	228.814	125.956	908.73		1000000003	275.085	162.605	1204.86
1000000198	256.658	275.304	-77.1146		1000010002	31.781	282.472	-933.528		1000000337	230.664	125.561	911.71		1000000003	274.88	161.185	1204.86
1000000198	260.054	274.863	-77.819		1000010002	32.2295	283.16	-933.641		1000000337	231.971	124.07	912.652		1000000003	275.77	162.048	1204.01
1000000198	262.502	274.042	-80.9321		1000010002	32.105	283.188	-932.994		1000000337	232.632	124.208	912.74		1000000003	275.803	162.084	1208.9
1000000198	262.699	274.197	-81.7006		1000010002	31.6664	283.033	-937.168		1000000337	231.913	124.954	912.831		1000000003	277.315	162.965	1208.08
1000000198	263.326	274.213	-83.814		1000010002	31.7691	283.196	-937.102		1000000337	231.39	124.659	912.183		1000000003	277.124	163.349	1205.16
1000000198	265.652	273.607	-86.8498		1000010002	31.7021	283.49	-933.564		1000000337	229.949	125.868	912.38		1000000003	276.815	163.261	1207.43
1000000198	267.117	272.661	-86.9007		1000010002	31.7939	283.536	-932.792		1000000337	229.346	126.16	907.724		1000000003	276.161	162.425	1209.76
1000000198	266.87	269.664	-89.9508		1000010002	31.6859	283.659	-932.963		1000000337	231.237	125.357	907.859		1000000003	275.653	162.167	1209.45
1000000198	267.078	267.741	-86.9101		1000010002	31.1908	282.987	-931.992		1000000337	231.323	124.307	907.608		1000000003	275.55	161.968	1207.53
1000000198	267.411	266.488	-86.6571		1000010002	31.2209	282.879	-933.09		1000000337	232.187	124.431	908.345		1000000003	276.24	162.991	1209.3
1000000198	267.531	265.343	-86.5345		1000010002	31.4861	282.705	-932.071		1000000337	232.147	124.139	908.525		1000000003	275.602	162.073	1207.28
1000000198	267.688	265.382	-86.6112		1000010002	31.5947	283.487	-932.664		1000000337	231.852	123.263	908.365		1000000003	276.022	162.518	1207.63
1000000198	267.882	266.251	-86.3461		1000010002	31.9779	283.063	-932.034		1000000337	233.034	124.444	909.617		1000000003	276.138	162.495	1206.26
1000000198	267.421	268.229	-90.3793		1000010002	31.8743	282.845	-932.643		1000000337	231.143	123.452	908.799		1000000003	276.797	163.015	1206.39
1000000198	267.28	267.949	-90.8928		1000010002	31.4317	283.701	-932.343		1000000337	229.851	122.879	908.406		1000000003	276.112	162.249	1209.62
1000000198	266.354	273.144	-86.7573		1000010002	31.6012	282.824	-932.443		1000000337	230.864	122.132	908.327		1000000056	192.835	123.443	1209.87
1000000198	266.436	273.786	-87.0108		1000010003	303.117	255.509	-935.109		1000000337	230.977	124.715	908.84		1000000056	192.742	123.7	1209.42
1000000198	266.072	273.487	-87.6277		1000010003	303.149	255.634	-933.751		1000000337	230.36	126.196	908.312		1000000056	192.656	123.334	1209.44
1000000198	265.827	274.073	-82.7929		1000010003	303.574	255.862	-930.648		1000000337	231.679	123.221	912.256		1000000056	191.983	123.253	1207.49
1000000198	266.134	273.442	-85.5187		1000010003	304.013	254.829	-933.458		1000000337	233.018	123.715	912.522		1000000056	192.346	123.99	1207.53
1000000198	265.281	273.45	-85.5388		1000010003	304.025	255.315	-934.546		1000000337	233.837	122.563	912.575		1000000056	191.055	123.601	1209.64
1000000198	264.185	273.661	-82.0736		1000010003	304.196	255.07	-934.539		1000000337	233.474	122.623	913.073		1000000056	191.555	123.903	1209.73
1000000198	264.811	273.974	-83.2665		1000010003	304.483	255.085	-938.791		1000000337	232.863	123.25	913.008		1000000056	191.026	124.198	1208.8
1000000198	264.639	274.304	-87.0973		1000010003	304.832	255.255	-937.702		1000000337	233.206	123.426	913.117		1000000056	188.274	124.631	1208.99
1000000198	264.7	273.682	-87.387		1000010003	304.45	255.674	-936.601		1000000337	232.796	122.946	913.544		1000000056	189.514	124.976	1210.23
1000000198	265	273.942	-87.1287		1000010003	303.587	255.395	-938.449		1000000337	232.272	123.345	912.785		1000000056	189.012	124.325	1209.41
1000000198	266.016	271.749	-85.7085		1000010003	303.811	255.387	-937.818		1000000337	233.557	122.476	912.94		1000000056	189.509	124.88	1209.02
1000000198	264.755	273.725	-83.5721		1000010003	304.089	255.731	-941.914		1000000337	233.464	122.893	912.825		1000000056	187.178	124.381	1206.96
1000000198	265.503	273.831	-86.9911		1000010003	304.417	254.39	-938.407		1000000337	233.005	122.892	912.921		1000000056	186.765	125.626	1208.15
1000000198	265.514	273.423	-86.7517		1000010003	304.496	254.896	-938.481		1000000337	231.694	122.871	912.997		1000000056	186.752	125.253	1210.52
1000000198	265.096	274.098	-86.0401		1000010003	305.159	255.092	-938.473		1000000337	233.519	122.471	913.05		1000000056	186.459	127.298	1209.62
1000000198	265.344	274.026	-85.7446		1000010003	304.668	255.483	-936.737		1000000337	233.321	123.516	913.217		1000000056	186.921	127.128	1205.38
1000000198	264.522	274.353	-82.2031		1000010003	304.952	255.145	-938.031		1000000337	233.876	122.997	910.683		1000000056	186.948	127.025	1205.29
1000000198	264.757	274.28	-82.6753		1000010003	305.294	255.141	-939.09		1000000337	233.827	123.242	913.089		1000000056	187.972	128.496	1205.57
1000000198	265.878	274.548	-87.4943		1000010003	305.382	256.311	-939.318		1000000337	233.905	122.956	914.144		1000000056	188.312	129.101	1205.7
1000000198	266.324	274.083	-82.4134		1000010003	305.067	256.008	-938.754		1000000337	233.106	123.153	914.405		1000000056	187.504	128.802	1205.5
1000000198	265.841	274.153	-86.8827		1000010003	305.653	256.019	-938.761		1000000337	233.399	123.215	913.614		1000000056	188.244	129.443	1204.81
1000000198	265.975	274.699	-86.622		1000010003	305.875	256.032	-938.463		1000000337	233.742	123.569	913.783		1000000056	188.701	129.224	1205.82
1000000198	266.2	274.282	-87.5952		1000010003	305.629	256.515	-939.024		1000000337	233.755	123.954	913.223		1000000056	188.022	129.51	1205.46
1000000198	267.532	274.033	-87.5675		1000010003	305.783	255.66	-938.667		1000000337	233.571	123.789	913.662		1000000056	188.43	130.806	1205.25
1000000198	267.41	273.438	-86.8459		1000010003	304.912	255.816	-938.442		1000000337	234.33	122.665	913.479		1000000056	187.932	129.471	1205.15
1000000198	267.605	273.552	-88.2249		1000010003	305.422	255.501	-938.835		1000000337	235.155	122.883	913.247		1000000056	189.588	130.664	1205.46
1000000198	267.83	272.492	-86.0466		1000010003	305.242	256.434	-939.844		1000000337	235.558	122.191	913.674		1000000056	189.256	130.866	1205.49
1000000198	269.973	271.829	-86.3247		1000010003	305.581	256.2	-938.122		1000000337	235.818	122.084	909.878		1000000056	189.137	130.788	1210.02
1000000198	269.895	271.93	-90.478		1000010003	305.774	256.39	-938.013		1000000337	235.041	121.376	913.231		1000000056	189.373	131.051	1209.99
1000000198	269.014	271.889	-87.4749		1000010003	305.629	256.427	-937.202		1000000337	234.574	122.852	913.715		1000000056	190.564	131.253	1205.29
1000000198	270.858	271.662	-86.9513		1000010003	305.882	255.542	-937.828		1000000337	235.255	122.565	913.142		1000000056	190.209	132.193	1205.55
1000000198	268.957	272.593	-87.29		1000010003	305.131	256.215	-935.557		1000000337	234.973	121.965	913.545		1000000056	190.153	132.535	1209.7
1000000198	269.599	272.315	-87.645		1000010003	306.139	255.744	-939.133		1000000337	235.908	121.603	913.252		1000000056	189.295	132.215	1210.12
1000000198	268.611	272.724	-86.983		1000010003	305.721	255.758	-934.27		1000000337	235.699	122.142	914.345		1000000056	189.23	134.472	1209.45
1000000198	268.9	272.458	-87.8292		1000010003	305.451	254.989	-937.56		1000000337	236.699	122.15	913.624		1000000056	189.183	137.538	1210.21
1000000198	267.858	273.623	-88.6224		1000010003	305.367	255.26	-939.813		1000000337	234.935	121.781	913.475		1000000056	189.497	133.334	1205.35
1000000198	268.929	272.356	-90.3194		1000010003	305.915	254.76	-936.723		1000000337	235.207	122.223	913.662		1000000056	189.386	132.647	1210.12
1000000198	266.157	274.135	-87.2268		1000010003	306.149	255.449	-938.295		1000000337	234.297	121.913	914.191		1000000056	190.391	131.796	1210.03
1000000198	268.997	272.759	-86.4366		1000010003	305.391	255.279	-938.19		1000000337	234.104	123.083	913.202		1000000056	190.041	132.053	1205.51
1000000198	269.253	272.989	-86.9198		1000010003	304.701	254.827	-938.462		1000000337	233.763	122.641	914.589		1000000354	187.536	136.856	1205.15
1000000198	269.128	272.279	-86.7421		1000010003	304.031	254.377	-937.5		1000000337	233.268	122.502	914.518		1000000354	189.505	136.992	1205.29
1000000198	268.018	272.863	-87.2109		1000010003	303.358	255.035	-943.051		1000000337	233.558	122.82	914.365		1000000354	185.126	139.781	1204.7
1000000198	268.396	272.512	-87.1368		1000010003	303.755	254.514	-934.615		1000000337	232.956	122.114	914.951		1000000354	187.258	138.153	1204.93
1000000198	267.037	272.936	-86.5033		1000010003	303.64	254.263	-935.918		1000000337	234.298	122.835	913.797		1000000354	189.197	135.85	1205.67
1000000198	266.549	273.389	-86.9222		1000010003	302.6	254.546	-939.936		1000000337	234.633	122.476	916.099		1000000354	186.74	138.432	1205.14
1000000198	266.183	273.049	-86.8563		1000010003	302.399	254.354	-939.373		1000000337	233.712	122.993	916.404		1000000354	187.978	138.228	1204.56
1000000198	265.263	274.237	-85.8663		1000010003	302.668	254.442	-935.81		1000000337	234.896	123.203	913.516		1000000354	187.033	137.711	1204.61
1000000198	265.147	274.056	-85.9646		1000010003	302.6	253.812	-934.611		1000000337	233.871	122.414	917.178		1000000354	187.433	138.045	1202.85
1000000198	269.913	272.34	-87.3599		1000010003	301.913	253.055	-938.066		1000000337	234.73	121.527	917.102		1000000354	188.143	137.793	1203.96
1000000198	270.609	271.803	-86.8382		1000010003	300.531	252.476	-939.047		1000000337	234.412	122.759	916.661		1000000354	188.035	138.016	1204.08
1000000198	271.872	271.056	-86.7634		1000010003	299.672	251.454	-940.199		1000000337	235.547	123.103	913.922		1000000354	187.071	137.528	1204.88
1000000198	271.245	270.522	-86.7629		1000010003	299.925	251.383	-938.784		1000000337	236.264	122.47	917.536		1000000354	187.097	137.1	1204.93
1000000198	270.982	270.907	-87.1018		1000010003	300.067	249.7	-943.558		1000000337	236.708	123.62	916.73		1000000354	185.964	136.836	1202.07
1000000198	270.321	271.481	-86.9649		1000010003	299.942	250.939	-941.529		1000000337	236.414	122.676	916.87		1000000354	187.265	137.443	1204.4
1000000198	269.776	271.207	-87.0314		1000010003	299.326	251.875	-937.745		1000000337	236.794	122.733	917.463		1000000354	186.68	137.257	1204.27
1000000198	269.289	271.654	-86.7387		1000010003	299.782	252.554	-938.164		1000000337	236.649	121.955	917.279		1000000354	186.324	138.865	1203.22
1000000198	269.487	271.991	-87.2348		1000010003	299.123	253.027	-938.865		1000000337	235.624	122.102	917.814		1000000354	186.191	137.237	1204.89
1000000198	268.851	272.513	-86.5026		1000010003	299.043	252.154	-938.113		1000000337	233.735	122.19	918.678		1000000354	186.804	138.197	1199.97
1000000198	268.153	272.207	-85.3577		1000010003	298.718	252.568	-938.488		1000000337	234.37	122.144	917.952		1000000354	185.629	136.901	1200.06
1000000198	266.599	273.161	-85.7939		1000010003	298.597	251.866	-938.723		1000000337	233.377	122.391	917.104		1000000354	187.196	138.323	1198.91
1000000198	268.275	271.394	-87.5094		1000010003	297.835	252.491	-939.244		1000000337	233.608	122.598	917.928		1000000354	188.501	134.544	1204.8
1000000198	269.416	271.223	-87.6848		1000010003	297.579	252.093	-938.689		1000000337	233.594	121.956	918.051		1000000354	189.414	133.245	1205.24
1000000198	269.351	271.351	-87.3354		1000010003	298.244	252.003	-938.851		1000000337	233.607	123.283	917.49		1000000354	185.362	135.897	1202.25
1000000198	269.763	271.066	-86.7336		1000010003	297.926	252.734	-940.362		1000000337	233.383	123.177	917.677		1000000354	185.485	136.181	1203.05
1000000198	270.717	270.872	-86.7087		1000010003	297.982	252.204	-938.994		1000000337	233.561	122.495	917.223		1000000354	185.729	136.09	1201.37
1000000198	272.226	270.572	-86.6565		1000010004	52.8724	210.246	-914.409		1000000337	233.389	123.321	917.826		1000000354	186.78	136.131	1200.35
1000000198	272.491	270.132	-86.5659		1000010004	51.9022	210.389	-915.399		1000000337	233.402	122.978	917.861		1000000354	185.958	136.105	1201.35
1000000198	272.432	269.591	-87.4097		1000010004	52.4291	210.309	-915.567		1000000337	233.173	123.432	917.846		1000000354	186.035	136.142	1200.98
1000000198	272.737	269.626	-86.2783		1000010004	52.4793	210.432	-916.043		1000000337	232.726	122.513	917.21		1000000354	185.791	135.449	1202.55
1000000198	272.732	269.596	-86.3669		1000010004	52.9506	209.981	-912.82		1000000337	233.408	123.061	917.843		1000000354	185.657	135.593	1203.81
1000000198	272.524	270.336	-88.9454		1000010004	50.7568	210.476	-912.238		1000000337	233.526	122.932	917.839		1000000354	186.26	135.974	1202.81
1000000198	272.798	269.691	-87.9588		1000010004	51.7941	210.332	-916.78		1000000337	232.333	123.187	918.148		1000000354	187.026	136.205	1204.27
1000000198	272.279	270.04	-87.4731		1000010004	50.5601	211.407	-914.466		1000000337	231.845	123	917.119		1000000354	186.428	135.836	1202.48
1000000198	272.207	269.989	-87.4557		1000010004	51.4359	210.544	-912.798		1000000342	48.9266	211.989	927.24		1000000354	186.694	136.26	1202.23
1000000198	272.486	270.243	-86.1132		1000010004	48.1772	211.51	-913.261		1000000342	47.9089	212.753	926.724		1000000354	187.036	135.896	1199.16
1000000198	272.106	270.706	-88.8009		1000010004	48.8897	212.599	-914.387		1000000342	46.4594	212.504	925.71		1000000354	186.56	136.036	1203.37
1000000198	271.089	271.318	-88.2912		1000010004	48.3647	212.072	-915.271		1000000342	45.9937	211.982	926.402		1000000354	186.44	136.121	1202.51
1000000198	270.753	271.935	-87.3061		1000010004	49.3835	211.437	-915.806		1000000342	45.5537	212.058	926.584		1000000354	185.544	135.426	1201.35
1000000198	267.648	272.998	-84.9909		1000010004	47.0295	217.234	-915.133		1000000342	44.836	212.513	926.482		1000000354	186.162	135.805	1202.4
1000000198	264.919	274.195	-86.8712		1000010004	49.3135	211.111	-916.564		1000000342	44.8253	212.506	921.47		1000000354	186.445	135.037	1201.35
1000000198	265.521	274.52	-87.0941		1000010004	48.764	211.843	-914.782		1000000342	44.4934	212.715	921.978		1000000354	186.364	136.316	1202.47
1000000198	266.221	274.242	-82.4147		1000010004	50.3148	210.405	-911.842		1000000342	45.1303	212.702	922.764		1000000354	188.515	132.61	1205.02
1000000198	268.186	273.76	-85.5776		1000010004	51.8659	210.7	-914.956		1000000342	45.7454	212.258	923.126		1000000354	187.787	132.826	1204.81
1000000198	267.997	273.178	-86.4877		1000010004	52.2698	210.579	-912.864		1000000342	45.324	212.498	922.219		1000000354	185.979	135.137	1202.03
1000000198	267.921	273.118	-86.5404		1000010004	52.8674	210.406	-914.882		1000000342	45.3032	212.801	922.516		1000000354	185.866	135.622	1200.99
1000000198	268.429	272.972	-85.2129		1000010004	53.6279	209.734	-915.699		1000000342	45.4351	213.363	922.231		1000000354	187.09	134.813	1206.52
1000000198	268.49	272.672	-86.6258		1000010004	53.546	210.274	-916.115		1000000342	45.1769	213.152	923.561		1000000354	185.952	135.746	1200.15
1000000198	268.826	272.083	-90.6525		1000010004	53.5708	209.319	-915.668		1000000342	45.4914	212.898	923.03		1000000354	186.514	135.765	1203.64
1000000198	267.001	272.85	-87.5649		1000010004	52.5336	209.929	-914.971		1000000342	44.5476	212.41	922.468		1000000354	186.689	135.567	1203.01
1000000198	266.706	271.579	-83.2317		1000010004	53.0802	209.877	-915.037		1000000342	44.6449	212.561	922.741		1000000354	188.857	132.174	1205.18
1000000198	268.746	271.404	-85.5988		1000010004	52.6367	210.447	-916.674		1000000342	45.1775	212.676	923.145		1000000354	187.527	134.304	1204.76
1000000198	269.596	270.695	-85.5252		1000010004	52.2799	210.597	-914.489		1000000342	45.3937	212.952	923.461		1000000354	186.137	135.107	1202.23
1000000198	270.454	269.8	-90.8757		1000010004	53.4995	209.954	-914.514		1000000342	45.5688	213.129	923.423		1000000354	187.258	134.974	1204.12
1000000198	272.013	268.979	-91.4166		1000010004	52.7908	210.65	-914.284		1000000342	46.1033	213.184	922.632		1000000354	186.277	136.452	1202.68
1000000198	272.198	268.424	-91.2604		1000010004	53.0086	210.012	-915.059		1000000342	44.9806	212.745	924.172		1000000354	186.375	137.513	1200.75
1000000198	270.222	270.601	-87.6593		1000010004	51.638	211.35	-914.079		1000000342	44.6836	212.852	925.865		1000000354	185.523	136.771	1201.95
1000000198	273.304	267.996	-89.7824		1000010004	52.4579	210.168	-920.354		1000000342	45.29	212.561	921.749		1000000354	185.454	136.932	1202.35
1000000198	273.032	269.029	-90.5405		1000010004	51.3326	210.661	-914.194		1000000342	45.0926	213.044	925.586		1000000354	185.822	137.39	1202.97
1000000198	272.817	268.878	-91.0364		1000010004	52.0292	210.873	-914.285		1000000342	46.2432	213.448	926.62		1000000354	185.973	137.26	1202.67
1000000198	273.609	268.411	-91.0036		1000010004	52.2387	210.204	-919.283		1000000342	46.3678	213.585	926.768		1000000354	188.556	133.632	1204.81
1000000198	272.686	269.847	-87.8345		1000010004	52.0303	210.385	-919.194		1000000342	45.6066	213.766	921.874		1000000354	186.097	137.713	1202.58
1000000198	273.068	269.047	-87.5549		1000010004	49.4524	210.834	-924.067		1000000342	45.9423	213.45	922		1000000354	188.619	133.71	1205.17
1000000198	273.159	269.153	-88.2794		1000010025	276.747	190.218	-924.844		1000000342	46.0547	213.037	922.911		1000000354	188.785	134.839	1209.39
1000000198	272.643	269.628	-87.2278		1000010025	277.19	190.845	-925.102		1000000342	46.6578	213.441	922.363		1000000354	186.69	138.316	1205.25
1000000198	273.054	269.607	-87.8108		1000010025	277.15	190.482	-928.943		1000000342	45.5706	213.026	922.632		1000000354	187.105	137.943	1207.14
1000000212	207.951	257.209	-58.619		1000010025	276.975	189.329	-927.952		1000000342	45.2203	212.929	922.556		1000000354	187.223	138.252	1206.77
1000000212	206.036	257.487	-58.6848		1000010025	276.887	190.327	-924.871		1000000342	45.0486	213.264	923.026		1000000354	189.006	134.291	1209.85
1000000212	207.12	254.208	-61.1159		1000010025	276.054	189.12	-926.876		1000000342	44.2737	213.431	924.097		1000000354	188.344	133.397	1205.43
1000000212	205.885	253.078	-62.2975		1000010025	275.459	188.404	-924.179		1000000342	41.2378	213.574	924.694		1000000354	188.43	132.465	1205.39
1000000212	204.764	251.366	-67.7444		1000010025	276.054	188.689	-928.155		1000000342	41.5169	213.754	922.977		1000000354	188.164	137.469	1204.87
1000000212	205.502	248.111	-70.9373		1000010025	275.241	189.596	-928.939		1000000342	40.032	213.352	922.792		1000000354	186.169	139.765	1203.04
1000000212	207.422	248.38	-66.4617		1000010025	275.657	188.822	-924.196		1000000342	39.9795	213.542	923.249		1000000354	188.899	133.169	1205.22
1000000212	210.94	247.356	-66.2449		1000010025	275.331	187.94	-924.57		1000000342	39.0406	213.818	922.407		1000000354	190.107	132.4	1205.56
1000000212	215.66	247.341	-70.3371		1000010025	276.185	189.479	-924.255		1000000342	38.7248	213.646	922.831		1000000354	189.602	132.585	1210.06
1000000212	220.321	248.769	-68.247		1000010025	277.912	192.111	-924.465		1000000342	38.2165	213.127	922.804		1000000354	190.444	135.542	1205.46
1000000212	225.878	244.97	-71.3041		1000010025	277.345	190.723	-923.997		1000000342	38.0178	213.345	922.563		1000000354	187.29	141.755	1204.32
1000000212	229.788	243.745	-71.9037		1000010025	278.584	193.951	-927.495		1000000342	37.5498	213.402	922.748		1000000354	186.733	140.387	1204.37
1000000212	233.26	244.387	-73.0608		1000010025	277.977	192.838	-926.958		1000000342	36.7133	212.631	921.317		1000000354	186.015	141.039	1202.31
1000000212	236.163	242.318	-76.1707		1000010025	278.849	195.113	-928.642		1000000342	34.0097	212.576	921.183		1000000354	188.134	145.721	1204.94
1000000212	238.399	237.175	-76.7005		1000010158	190.676	213.604	-929.862		1000000342	31.2789	210.286	919.065		1000000354	187.134	143.627	1202.96
1000000212	242.602	236.088	-72.0484		1000010158	190.158	216.076	-930.469		1000000342	28.6847	209.641	919.154		1000000354	186.548	143.528	1204.35
1000000212	245.647	235.68	-75.9501		1000010158	191.089	215.063	-929.09		1000000342	23.5824	208.839	921.287		1000000354	185.743	141.915	1201.51
1000000212	247.296	232.334	-75.8891		1000010158	190.412	217.623	-928.624		1000000342	22.0937	209.365	922.062		1000000354	185.311	140.291	1202.38
1000000212	248.844	230.362	-76.9297		1000010158	191.586	215.684	-929.866		1000000342	19.9861	208.534	921.864		1000000354	186.177	142.153	1202.61
1000000212	249.615	227.472	-76.5576		1000010158	190.508	215.16	-933.829		1000000342	19.7521	208.203	922.413		1000000354	185.864	142.759	1202.42
1000000212	248.473	225.053	-77.1558		1000010158	191.085	216.76	-928.082		1000000342	17.884	208.927	922.206		1000000354	185.473	142.641	1202.88
1000000212	248.33	223.58	-78.0688		1000010158	191.152	215.895	-928.71		1000000342	15.2771	208.634	921.91		1000000354	187.583	147.48	1205.36
1000000212	247.769	224.404	-78.1827		1000010158	190.839	216.263	-933.525		1000000342	14.0545	208.207	922.446		1000000354	188.235	147.597	1210.3
1000000212	245.661	223.8	-77.6853		1000010158	190.15	216.786	-937.913		1000000342	10.857	208.708	922.493		1000000354	187.33	145.442	1210.13
1000000212	245.643	224.47	-77.6681		1000010158	191.02	216.025	-931.393		1000000342	10.4388	208.784	923.5		1000000354	187.751	147.764	1209.41
1000000212	245.631	220.389	-77.7218		1000010158	189.698	217.05	-932.816		1000000342	10.5936	209.627	922.7		1000000354	188.103	149.091	1210.03
1000000212	244.537	218.51	-80.6539		1000010158	190.425	217.413	-933.172		1000000342	10.5159	209.971	924.03		1000000354	188.362	147.03	1210.08
1000000212	244.966	218.213	-80.6159		1000010158	189.954	215.056	-928.943		1000000342	10.2978	210.762	925.453		1000000354	188.12	148.439	1209.96
1000000212	245.462	217.542	-81.0214		1000010158	189.291	217.516	-933.708		1000000342	9.22855	209.763	926.001		1000000354	187.973	147.25	1209.85
1000000212	244.895	217.236	-81.6081		1000010158	189.601	217.255	-930.906		1000000342	8.38968	208.17	927.254		1000000354	187.879	145.805	1209.38
1000000212	245.673	217.247	-81.2675		1000010158	189.323	216.321	-930.316		1000000342	7.94781	207.275	927.135		1000000354	188.48	147.345	1208.04
1000000212	245.515	218.509	-81.8721		1000010194	273.018	187.939	-923.58		1000000342	7.45242	206.373	927.214		1000000354	187.958	147.125	1209.72
1000000212	245.08	218.236	-81.0504		1000010194	272.73	187.518	-923.48		1000000342	6.9193	204.915	928.359		1000000354	186.848	143.593	1209.16
1000000212	245.281	217.66	-81.3549		1000010194	270.545	187.788	-929.981		1000000342	6.13042	203.798	928.298		1000000447	185.181	265.176	1205.25
1000000212	245.349	218.948	-78.0407		1000010194	270.109	187.526	-924.665		1000000342	6.54935	203.666	928.456		1000000447	184.67	265.841	1205.23
1000000212	243.91	219.874	-81.3906		1000010194	269.206	188.283	-928.354		1000000342	6.07762	203.617	928.316		1000000447	184.605	265.339	1204.53
1000000212	242.956	220.793	-75.2547		1000010194	267.686	188.772	-927.797		1000000342	6.2556	203.169	928.71		1000000447	183.266	265.006	1204.72
1000000212	242.641	222.932	-78.9175		1000010194	269.425	188.668	-928.846		1000000342	4.42389	203.4	928.532		1000000447	182.649	265.448	1202.04
1000000212	242.805	224.712	-76.8122		1000010194	269.624	189.481	-923.683		1000000342	4.00541	203.063	928.716		1000000447	181.439	265.836	1202.55
1000000212	242.664	223.537	-76.73		1000010194	269.09	188.805	-926.703		1000000342	3.57135	202.972	929.138		1000000447	181.092	265.295	1201.5
1000000212	243.995	226.174	-76.5378		1000010194	268.79	190.207	-921.438		1000000342	3.39178	202.997	931.216		1000000447	179.707	263.903	1202.41
1000000212	245.849	226.628	-76.6008		1000010194	268.857	190.284	-922.554		1000000342	2.53663	202.976	930.854		1000000447	180.54	265.534	1205.17
1000000212	249.686	228.797	-76.4928		1000010194	269.394	190.277	-925.391		1000000342	4.34507	204.723	929.356		1000000447	181.275	264.093	1201.42
1000000212	249.32	229.223	-76.0233		1000010194	268.72	191.388	-923.488		1000000342	3.25084	203.352	930.306		1000000447	180.966	264.72	1201.38
1000000212	250.227	232.972	-71.3493		1000010194	268.07	192.937	-922.196		1000000342	2.77294	202.817	931.212		1000000447	181.078	264.83	1202.18
1000000212	249.351	235.927	-70.3575		1000010194	266.342	193.811	-921.571		1000000342	2.18687	202.413	932.709		1000000447	180.427	263.647	1202.16
1000000212	249.742	236.659	-66.5321		1000010194	264.817	195.647	-922.238		1000000352	2.10526	245.559	922.355		1000000447	180.513	263.793	1198.95
1000000212	250.121	235.584	-64.9814		1000010194	264.219	194.429	-925.338		1000000352	1.84823	246.64	922.64		1000000447	180.763	264.555	1201.12
1000000212	249.863	237.812	-64.689		1000010194	263.244	195.127	-923.497		1000000352	2.02815	246.042	922.156		1000000447	181.37	265.035	1202.59
1000000212	247.752	242.294	-65.0985		1000010194	263.766	195.229	-923.738		1000000352	1.9383	245.982	922.933		1000000447	182.242	263.992	1198.37
1000000212	247.183	245.445	-66.8275		1000010194	263.8	194.471	-927.565		1000000352	2.59806	245.762	919.373		1000000447	182.574	263.754	1196.24
1000000212	247.684	244.321	-66.6436		1000010194	263.572	194.544	-925.526		1000000352	3.26661	245.143	918.995		1000000447	182.218	263.59	1196.97
1000000212	246.478	249.074	-64.6291		1000010194	262.939	195.122	-924.929		1000000352	4.20634	244.308	918.613		1000000540	185.868	268.67	1191.3
1000000212	246.871	252.374	-65.6929		1000010194	262.493	194.873	-925.568		1000000352	5.45979	243.871	918.491		1000000540	185.402	269.326	1191.17
1000000212	247.144	256.005	-67.9357		1000010194	262.434	194.712	-924.876		1000000352	6.71048	242.981	919.444		1000000540	185.834	269.882	1189.24
1000000212	248.102	259.434	-66.0886		1000010194	262.424	194.339	-924.401		1000000352	7.96077	242.084	919.277		1000000540	185.613	268.342	1187.82
1000000212	251.851	267.06	-64.8791		1000010194	262.055	195.686	-924.856		1000000352	10.3885	240.123	922.947		1000000540	185.569	270.002	1190.27
1000000212	257.168	271.208	-65.2905		1000010194	262.374	194.798	-924.521		1000000352	11.3389	239.908	922.958		1000000540	185.547	268.557	1191.06
1000000212	257.489	271.304	-70.346		1000010194	261.972	195.52	-925.114		1000000352	11.9969	237.782	923		1000000540	185.678	267.957	1186.88
1000000212	258.638	272.577	-71.3637		1000010194	261.478	195.446	-924.604		1000000352	13.0169	237.042	922.256		1000000540	185.567	269.365	1189.99
1000000212	260.424	275.471	-71.9432		1000010194	261.791	195.738	-925.246		1000000352	13.6398	236.634	921.62		1000000540	185.795	268.736	1189.88
1000000212	260.725	277.743	-76.3306		1000010194	262.345	196.222	-925.44		1000000352	15.5063	236.459	923.057		1000000540	184.967	268.475	1187.7
1000000212	261.094	278.537	-78.8298		1000010194	262.356	195.919	-926.469		1000000352	14.2151	235.439	922.171		1000000540	185.136	270.273	1189.83
1000000212	263.103	280.515	-76.4474		1000010223	231.907	277.931	-952.771		1000000352	16.1087	234.718	922.993		1000000540	184.667	268.313	1187.65
1000000212	264.459	282.111	-76.4528		1000010223	230.865	279.365	-956.676		1000000352	18.0244	235.357	926.364		1000000540	185.472	269.064	1189.29
1000000212	267.072	283.74	-75.4033		1000010223	231.519	279.488	-949.007		1000000517	298.45	203.665	917.048		1000000540	185.698	267.746	1187.54
1000000212	270.493	288.765	-71.1416		1000010223	231.26	279.206	-955.042		1000000517	296.675	204.846	914.25		1000000540	185.443	268.909	1187.2
1000000212	273.602	291.53	-71.5801		1000010223	230.813	279.056	-948.389		1000000517	296.35	205.825	913.549		1000000540	185.404	269.037	1190.41
1000000212	276.168	294.995	-74.7735		1000010223	231.396	278.311	-950.984		1000000517	297.618	203.743	913.471		1000000540	185.594	269.283	1190.56
1000000212	277.569	296.608	-73.6526		1000010223	231.143	279.405	-949.545		1000000517	300.437	200.744	909.328		1000000540	185.584	268.937	1188.16
1000000212	280.751	301.204	-73.4135		1000010223	231.548	278.854	-950.276		1000000517	302.111	199.077	908.06		1000000540	185.574	269.596	1188.17
1000000212	283.619	304.472	-67.3315		1000010223	231.156	278.22	-949.573		1000000517	302.901	197.737	908.816		1000000540	186	269.092	1188.35
1000000212	285.881	309.459	-66.5596		1000010223	230.525	278.637	-951.89		1000000517	304.434	196.457	907.915		1000000540	185.853	269.383	1187.17
1000000212	287.731	312.836	-69.6795		1000010223	230.548	278.968	-953.619		1000000517	304.593	196.587	906.956		1000000540	185.741	269.876	1187.41
1000000212	288.043	314.906	-70.1268		1000010223	230.135	278.76	-952.785		1000000517	304.571	196.527	907.03		1000000540	185.793	268.953	1185.88
1000000212	288.484	318.111	-68.6838		1000010223	230.588	278.898	-952.102		1000000517	305.138	196.275	907.847		1000000540	185.843	269.994	1188.85
1000000212	286.566	322.363	-68.0188		1000010223	230.588	278.034	-950.236		1000000517	305.456	195.411	907.567		1000000540	185.791	269.38	1189.14
1000000212	284.056	327.219	-64.1257		1000010223	230.615	278.446	-955.366		1000000517	305.037	196.203	907.828		1000000540	185.698	269.211	1188.19
1000000212	283.72	328.556	-65.1445		1000010223	229.664	282.028	-952.915		1000000517	306.31	195.047	907.087		1000000540	185.708	269.91	1189.95
1000000320	49.8308	229.483	-63.2579		1000010223	228.375	284.356	-949.556		1000000517	307.008	194.422	906.955		1000000540	185.859	270.454	1189.88
1000000320	49.4184	230.113	-63.0719		1000010223	228.476	284.56	-948.567		1000000517	308.584	193.792	904.295		1000000540	185.786	269.803	1185.66
1000000320	48.0443	229.357	-63.4124		1000010223	228.491	284.879	-948.424		1000000517	311.047	192.378	903.538		1000000540	185.922	270.229	1185.01
1000000320	48.5189	228.693	-62.9782		1000010223	227.991	284.873	-948.65		1000000517	310.392	192.383	904.758		1000000540	186.089	270.66	1186.17
1000000320	47.3237	229.174	-62.5897		1000010223	228.715	285.903	-948.903		1000000517	315.252	190.48	903.396		1000000540	186.131	269.88	1187.13
1000000320	45.0361	229.768	-62.6202		1000010223	228.768	285.128	-948.715		1000000517	315.534	190.393	904.122		1000000540	186.335	269.657	1187.31
1000000320	44.4034	229.964	-62.7635		1000010223	228.492	286.046	-948.897		1000000517	317.178	190.732	904.279		1000000540	186.55	269.884	1185.69
1000000320	42.7105	230.63	-62.6827		1000010223	228.848	285.222	-948.29		1000000517	317.527	190.57	904.432		1000000540	186.381	270.156	1189.34
1000000320	40.7801	229.121	-63.3689		1000010223	229.449	285.006	-949.006		1000000517	316.732	190.476	902.126		1000000540	186.262	270.214	1185.89
1000000320	38.433	226.612	-57.6819		1000010223	228.014	285.305	-948.829		1000000517	318.553	190.402	903.823		1000000540	186.147	269.894	1187.26
1000000320	37.1236	225.253	-62.557		1000010223	226.958	284.559	-948.394		1000000531	225.701	151.193	922.827		1000000540	185.84	270.857	1189.27
1000000320	35.6691	225.064	-62.4448		1000010252	168.139	239.095	-939.025		1000000531	226.3	150.925	922.59		1000000540	186.103	271.142	1191.64
1000000320	34.437	223.948	-62.614		1000010252	169.067	238.689	-939.085		1000000531	225.738	150.733	922.234		1000000540	185.84	269.711	1187.06
1000000320	33.2047	222.128	-62.5779		1000010252	167.056	238.859	-940.362		1000000531	226.307	151.548	922.133		1000000540	185.436	270.659	1187.22
1000000320	31.7263	221.883	-62.5045		1000010252	168.86	239.237	-939.742		1000000531	226.647	151.264	922.596		1000000540	185.521	272.753	1190.2
1000000320	32.75	221.936	-62.4287		1000010252	169.406	239.006	-939.385		1000000531	226.763	152.012	922.166		1000000540	185.536	271.749	1190.55
1000000320	32.5582	222.324	-62.6893		1000010252	169.491	238.863	-938.895		1000000531	226.23	151.793	922.139		1000000540	184.779	270.602	1187.48
1000000320	32.4689	221.684	-62.5028		1000010252	165.984	238.429	-939.004		1000000531	226.783	151.223	923.361		1000000540	185.348	270.836	1190.31
1000000320	32.7649	222.161	-62.4569		1000010252	165.101	237.952	-941.076		1000000531	226.628	151.753	922.844		1000000540	185.096	271.212	1190.79
1000000320	31.4638	220.23	-62.8069		1000010252	165.571	238.062	-940.493		1000000531	227.18	151.429	923.072		1000000540	185.124	271.346	1190.74
1000000320	29.8897	220.063	-62.3989		1000010252	165.198	237.798	-939.019		1000000531	226.699	151.503	922.928		1000000540	184.998	270.273	1187.43
1000000330	284.121	333.787	-72.0745		1000010252	169.685	238.659	-943.541		1000000531	226.815	151.407	922.784		1000000540	184.763	271.08	1190.3
1000000330	285.035	331.784	-71.6248		1000010252	165.521	237.411	-942.543		1000000531	226.995	151.47	922.768		1000000540	185.155	270.779	1187.24
1000000330	285.69	332.888	-72.1774		1000010252	165.791	238.452	-938.725		1000000531	225.138	151.129	923.215		1000000540	185.499	270.807	1191.73
1000000330	286.26	330.887	-70.1864		1000010252	168.278	238.675	-938.732		1000000531	227.027	150.941	922.494		1000000540	185.556	271.684	1194.69
1000000330	286.34	330.118	-70.1868		1000010252	167.37	238.105	-938.63		1000000531	226.604	151.93	922.617		1000000540	185.027	271.233	1192.06
1000000330	287.472	324.787	-70.8581		1000010252	168.213	238.332	-938.713		1000000531	226.064	151.203	923.296		1000000540	184.357	270.109	1191.09
1000000330	287.828	322.125	-71.445		1000010252	170.019	239.099	-938.879		1000000543	117.98	60.4609	938.31		1000000540	184.909	270.774	1191.51
1000000330	288.658	321.029	-72.238		1000010252	169.19	238.461	-938.934		1000000543	118.249	60.1405	938.112		1000000540	184.553	270.999	1194.49
1000000330	287.563	319.196	-68.0234		1000010252	165.027	237.317	-939.911		1000000543	119.391	60.6804	937.769		1000000540	184.619	270.613	1191.71
1000000330	287.825	318.756	-71.8809		1000010252	169.219	238.289	-938.828		1000000543	119.712	60.4744	936.369		1000000540	184.148	270.238	1192.75
1000000330	286.71	318.224	-71.6375		1000010252	168.826	237.675	-938.826		1000000543	119.517	61.0929	937.792		1000000540	184.943	270.823	1191.55
1000000330	284.137	316.326	-69.1782		1000010252	168.458	238.042	-938.801		1000000543	118.665	60.7536	938.802		1000000540	184.711	271.412	1191.82
1000000330	285.97	315.863	-71.9306		1000010252	168.565	237.417	-938.57		1000000543	119.201	61.4415	938.358		1000000747	141.545	217.121	1176.13
1000000330	287.26	316.686	-71.4532		1000010292	189.119	217.181	-930.47		1000000543	118.601	60.9722	939.205		1000000747	141.983	217.849	1177.39
1000000330	287.974	316.338	-71.961		1000010292	188.551	216.586	-932.927		1000000543	119.84	60.8879	937.92		1000000747	142.386	217.612	1179.74
1000000330	287.558	316.226	-72.2326		1000010292	188.511	214.165	-929.741		1000000543	119.849	60.1999	938.402		1000000747	142.634	218.011	1180.08
1000000330	287.531	315.697	-72.4517		1000010292	188.301	214.928	-929.679		1000000543	120.085	59.6976	938.148		1000000747	142.123	217.352	1181.07
1000000330	286.917	315.606	-72.8736		1000010292	189.443	215.022	-933.689		1000000543	119.949	60.4186	939.383		1000000747	142.952	218.763	1178.95
1000000330	288.367	315.78	-71.8506		1000010292	188.163	213.673	-933.033		1000000543	119.325	60.6821	938.07		1000000747	142.424	217.733	1178.9
1000000330	287.48	313.917	-71.6123		1000010292	188.535	216.922	-928.937		1000000543	119.552	58.8274	940.593		1000000747	142.508	218.159	1178.17
1000000330	287.2	314.028	-72.2953		1000010292	188.515	214.23	-928.574		1000000543	118.986	60.0876	936.652		1000000747	142.859	218.003	1181.46
1000000330	286.8	313.096	-72.4016		1000010292	187.995	214.509	-930.039		1000000543	119.361	60.2929	939.215		1000000747	143.029	217.957	1181.62
1000000330	286.932	313.192	-72.1594		1000010292	187.985	212.47	-929.069		1000000543	120	60.0628	938.631		1000000747	143.268	218.118	1181.43
1000000330	286.089	307.5	-75.1734		1000010292	186.864	216.584	-928.83		1000000543	119.096	60.3686	939.229		1000000747	143.178	218.353	1181.33
1000000330	285.77	307.469	-72.5107		1000010292	187.545	214.025	-928.811		1000000543	119.278	60.2179	938.413		1000000747	142.407	218.516	1182.01
1000000330	285.706	305.659	-75.9556		1000010292	187.458	214.528	-928.929		1000000543	119.366	60.0748	940.589		1000000747	142.574	218.627	1182.17
1000000330	284.476	304.477	-76.1052		1000010292	188.395	214.464	-929.389		1000000543	118.863	60.7065	937.516		1000000747	142.931	218.707	1181.75
1000000330	285.67	304.774	-75.4276		1000010292	187.909	215.196	-929.2		1000000543	119.23	60.0812	938.234		1000000747	142.757	218.432	1182.25
1000000330	286.17	305.688	-72.2378		1000010292	187.594	215.658	-928.127		1000000543	118.425	60.0304	938.33		1000000747	142.675	218.094	1182.19
1000000421	311.233	147.349	-65.1087		1000010292	188.443	214.986	-928.757		1000000543	112.289	59.3275	938.037		1000000747	142.842	218.458	1181.65
1000000421	311.899	146.062	-63.5031		1000001000	244.323	112.012	-1044.2		1000000651	22.6481	241.448	927.907		1000000747	142.744	218.531	1182.06
1000000421	313.794	144.68	-63.6489		1000001000	244.858	112.115	-1044.4		1000000651	22.1246	241.025	928.657		1000000747	142.991	218.991	1181.46
1000000421	313.929	143.911	-64.8721		1000001000	244.819	111.547	-1045.62		1000000651	22.2985	241.483	928.667		1000000747	144.167	218.801	1182.16
1000000421	313.616	143.294	-66.1118		1000001000	244.4	110.51	-1044.7		1000000651	21.6887	239.389	930.455		1000002016	170.783	225.518	-261.256
1000000421	312.988	144.794	-66.7207		1000001000	244.859	110.15	-1046.54		1000000651	20.0883	238.679	928.221		1000002016	170.839	225.195	-261.467
1000000421	313.441	144.803	-65.7743		1000001000	245.185	109.289	-1045.86		1000000651	20.1677	238.002	929.029		1000002016	170.332	224.842	-260.81
1000000421	313.595	143.689	-66.4765		1000001000	245.502	107.54	-1047.24		1000000651	18.0907	234.191	928.326		1000002016	170.631	226.033	-260.651
1000000421	313.136	143.881	-67.8933		1000001000	245.007	107.765	-1046.94		1000000651	19.2592	233.109	931.122		1000002016	170.251	224.617	-262.906
1000000421	313.345	141.391	-68.7605		1000001000	246.241	105.439	-1047.71		1000000651	17.1442	231.993	928.278		1000002016	171.117	226.173	-261.393
1000000421	313.972	140.255	-67.2325		1000001000	246.956	104.722	-1045.47		1000000651	15.4339	231.386	927.756		1000002016	170.916	225.224	-261.848
1000000421	313.306	136.387	-69.912		1000001000	246.875	104.228	-1042.89		1000000651	14.2952	231.502	927.606		1000002016	170.139	225.795	-261.809
1000000421	312.562	135.494	-73.4959		1000001000	246.458	105.169	-1046.42		1000000651	14.1837	231.265	927.41		1000002016	170.041	224.697	-265.154
1000000421	311.205	134.004	-75.1461		1000001000	245.038	108.877	-1046.42		1000000651	14.7263	230.335	927.977		1000002016	170.586	223.646	-266.038
1000000421	311.673	134.782	-73.6035		1000001000	245.202	109.146	-1046.66		1000000651	14.6846	230.489	925.783		1000002016	170.833	223.867	-264.753
1000000421	311.969	134.915	-72.0675		1000001000	245.015	109.802	-1047.4		1000000651	15.6405	229.775	928.771		1000002016	170.733	224.131	-265.779
1000000421	311.134	133.698	-75.6612		1000001000	244.857	110.595	-1048.95		1000000651	18.2685	228.797	931.955		1000002016	171.308	223.279	-266.772
1000000421	312.677	135.082	-70.0677		1000001000	244.869	109.277	-1049.92		1000000651	18.4399	227.643	932.302		1000002016	171.409	224.197	-266.584
1000000421	313.606	135.647	-68.7768		1000001000	245.03	109.023	-1048.14		1000000651	16.6229	228.773	930.818		1000002016	171.887	223.577	-267.938
1000000421	314.687	134.5	-67.0896		1000001000	245.071	110.128	-1050.46		1000000651	19.3146	227.268	932.753		1000002016	171.794	222.925	-270.572
1000000421	314.415	135.135	-66.2941		1000001000	245.607	109.974	-1051.76		1000000651	15.112	229.466	928.298		1000002016	172.046	222.307	-270.964
1000000421	316.715	135.756	-66.6014		1000001000	245.926	106.78	-1049.43		1000000651	18.3795	227.726	931.954		1000002016	171.41	223.465	-266.663
1000000421	317.673	136.235	-71.2736		1000001000	245.624	107.214	-1050.57		1000000651	21.4441	226.971	936.795		1000002016	171.515	223.726	-266.704
1000000421	316.658	135.666	-71.6297		1000001000	246.457	105.883	-1047.99		1000000651	19.9347	228.041	932.809		1000002016	171.889	223.195	-266.613
1000000421	317.356	135.957	-71.86		1000001000	246.239	107.736	-1051.34		1000000651	21.5665	227.631	934.655		1000002016	171.477	222.706	-269.678
1000000421	317.573	136.468	-66.3101		1000001000	246.01	106.44	-1047.72		1000000651	22.6812	225.771	936.596		1000002016	171.62	222.505	-269.643
1000000421	318.596	136.376	-66.2729		1000001000	246.418	108.791	-1050.9		1000000651	23.5745	225.685	937.609		1000002016	171.893	222.376	-270.038
1000000421	319.423	136.784	-70.9099		1000001000	246.828	104.042	-1049.8		1000000651	23.6875	226.218	937.754		1000002016	172.333	223.64	-267.95
1000000421	319.777	136.188	-70.8566		1000001000	246.518	103.091	-1047.26		1000000651	27.7654	224.302	940.778		1000002016	173.24	223.094	-266.399
1000000421	320.402	136.456	-69.1724		1000001000	247.179	105.158	-1050.09		1000000689	19.6061	148.544	941.72		1000002016	172.693	222.508	-266.038
1000000421	320.071	136.532	-70.8739		1000001000	247.669	106.956	-1050.56		1000000689	20.1675	148.253	941.386		1000002016	172.546	223.871	-266.223
1000000421	319.917	136.725	-67.0342		1000001000	247.424	106.438	-1050.67		1000000689	19.8785	145.812	941.772		1000002016	172.654	223.372	-266.598
1000000421	319.661	135.975	-66.2932		1000001000	246.813	105.32	-1049.51		1000000689	20.407	144.437	941.527		1000002016	172.578	223.519	-266.947
1000000421	319.416	135.629	-71.1327		1000001000	246.764	105.148	-1049.96		1000000689	20.6536	143.398	939.545		1000002016	171.65	223.576	-268.132
1000000421	319.693	134.517	-67.4112		1000001000	246.414	104.628	-1050.95		1000000689	21.0939	143.589	939.662		1000002016	171.198	223.261	-267.715
1000000421	319.147	135.447	-70.5889		1000001000	246.926	104.518	-1050.58		1000000689	21.4483	142.761	938.328		1000002016	171.583	223.195	-267.546
1000000421	319.634	134.641	-71.078		1000001000	245.739	104.735	-1051.09		1000000689	22.6468	142.327	937.698		1000002016	171.834	223.685	-267.232
1000000421	319.036	135.208	-70.2421		1000001000	245.009	102.493	-1048.26		1000000689	22.8208	141.976	937.824		1000002016	172.174	222.994	-266.74
1000000421	320.591	135.31	-68.5661		1000001000	245.304	102.664	-1049.89		1000000689	23.4506	142.109	936.641		1000002016	172.521	223.058	-265.218
1000000421	319.656	135.553	-70.9347		1000001000	245.396	103.273	-1050.11		1000000689	24.1118	141.79	936.294		1000002016	172.508	222.874	-265.818
1000000421	319.194	134.408	-69.5276		1000001000	245.207	101.82	-1045.03		1000000689	22.8739	143.395	934.127		1000002016	172.114	223.337	-267.607
1000000421	318.33	133.131	-67.9187		1000001000	244.793	103.453	-1049.3		1000000689	22.685	144.242	934.49		1000002016	173.336	224.798	-267.072
1000000421	319.87	133.85	-68.2254		1000001000	245.139	103.128	-1049.83		1000000689	21.1709	145.076	934.13		1000002016	172.499	224.416	-267.203
1000000421	320.478	135.803	-73.3071		1000001000	245.076	101.682	-1046.67		1000000689	20.8481	144.564	935.189		1000002016	171.768	224.056	-267.042
1000000421	320.791	135.056	-72.8921		1000001001	88.6719	268.283	-1050.32		1000000689	18.5652	144.664	933.638		1000002016	172.502	224.605	-263.484
1000000421	320.23	135.032	-73.395		1000001001	88.7868	268.047	-1049.98		1000000689	18.7348	145.223	935.099		1000002016	172.161	224.582	-262.438
1000000421	319.594	134.187	-73.2979		1000001001	88.5561	268.041	-1050.27		1000000689	18.6585	144.677	935.079		1000002016	172.627	224.921	-262.562
1000000421	317.974	134.344	-72.8625		1000001001	88.8663	268.098	-1050.3		1000000689	19.0945	144.993	934.825		1000002016	173.23	224.136	-262.601
1000000421	318.752	135.636	-72.9097		1000001001	88.3818	268.088	-1050.67		1000000689	17.4135	147.404	932.821		1000002016	172.674	223.339	-262.271
1000000421	319.606	135.788	-72.853		1000001001	88.3289	267.675	-1050.51		1000000689	16.3356	147.634	932.868		1000002016	173.28	223.325	-263.12
1000000421	318.622	135.426	-73.0493		1000001001	88.3392	267.372	-1051.89		1000000689	16.4276	147.51	933.333		1000002016	172.894	224.687	-262.354
1000000421	319.197	134.953	-72.937		1000001001	88.7384	267.448	-1050.34		1000000689	15.9914	147.932	932.648		1000002016	172.989	224.839	-263.369
1000000421	318.724	135.122	-73.0997		1000001001	88.1709	267.568	-1050.78		1000000689	15.7875	148.314	934.113		1000002016	172.883	224.702	-263.323
1000000421	319.528	134.829	-69.0052		1000001001	88.4704	267.757	-1052.4		1000000689	15.8276	147.683	932.324		1000002016	172.9	224.714	-262.947
1000000421	319.644	135.634	-68.2264		1000001001	88.611	267.339	-1051.16		1000000689	15.7768	148.67	931.702		1000002016	173.418	223.842	-261.902
1000000421	319.81	134.822	-68.7054		1000001001	88.108	267.13	-1050.66		1000000689	14.849	147.446	927.381		1000002016	174.575	223.847	-262.481
1000000421	321.232	134.935	-68.3196		1000001001	87.6858	267.426	-1050.67		1000000689	14.912	147.865	925.501		1000002016	173.307	225.106	-261.692
1000000421	321.094	134.577	-68.9112		1000001001	87.4253	267.183	-1051		1000000689	15.2412	147.58	927.266		1000002016	172.802	225.688	-261.418
1000000421	320.525	135.257	-68.8126		1000001001	86.6824	268.046	-1050.53		1000000689	15.2447	147.269	927.032		1000002016	172.342	227.679	-261.724
1000000421	320.284	134.325	-70.3227		1000001001	88.0206	267.947	-1050.75		1000000689	14.7415	147.08	924.488		1000002016	172.033	224.967	-262.401
1000000421	320.037	135.109	-69.2576		1000001001	88.1728	267.584	-1050.39		1000000689	15.4957	147.642	926.71		1000002016	171.8	225.034	-266.761
1000000421	321.365	135.965	-70.0458		1000001001	87.5591	267.614	-1050.48		1000000689	15.5245	146.599	926.878		1000002016	171.411	224.904	-266.424
1000000421	320.277	135.789	-68.3482		1000001001	87.2799	267.937	-1056.08		1000000689	16.2407	144.82	926.109		1000002016	171.394	226.054	-266.155
1000000421	321.529	135.174	-69.1189		1000001001	87.6222	267.691	-1051.83		1000000747	119.257	60.0779	940.574		1000002016	171.993	225.718	-266.545
1000000421	321.147	135.485	-67.9891		1000001001	87.968	267.704	-1056.08		1000000747	120.684	61.2235	940.569		1000002016	171.903	225.73	-265.524
1000000421	320.962	134.806	-67.7283		1000001001	87.701	267.829	-1056.08		1000000747	120.685	61.8229	940.336		1000002016	171.723	226.574	-263.087
1000000421	321.903	132.7	-67.9903		1000001001	86.9463	267.946	-1056.08		1000000747	120.021	60.7677	940.019		1000002016	171.93	225.259	-265.326
1000000421	321.041	133.556	-68.411		1000001001	87.1436	267.691	-1056.08		1000000747	120.595	59.9681	940.284		1000002016	171.713	226.661	-263.164
1000000421	322.396	133.22	-68.0468		1000001001	88.5831	267.64	-1056.08		1000000747	120.661	59.0216	938.397		1000002016	171.434	227.088	-262.062
1000000421	322.286	132.035	-67.7831		1000001001	88.0742	267.505	-1056.08		1000000747	120.337	60.5701	939.819		1000002016	171.874	228.023	-262.098
1000000421	321.419	133.182	-68.1576		1000001001	88.9747	267.154	-1056.08		1000000747	120.556	59.5912	941.559		1000002016	171.676	227.473	-261.88
1000000421	320.954	133.496	-68.2865		1000001001	87.6848	267.925	-1056.08		1000000747	119.109	59.5823	941.452		1000002016	171.967	227.699	-262.409
1000000421	320.728	133.825	-68.4144		1000001001	87.3969	267.976	-1056.08		1000000747	119.811	59.8665	940.666		1000002016	171.977	228.923	-261.974
1000000421	319.781	132.696	-68.4457		1000001001	88.2736	267.314	-1056.08		1000000747	120.719	61.1275	939.941		1000002016	172.889	229.319	-262.7
1000000421	317.329	133.608	-68.4618		1000001001	88.776	267.916	-1056.08		1000000747	119.572	60.5643	941.219		1000002016	172.413	229.969	-264.976
1000000421	317.809	133.063	-70.1207		1000001001	88.529	267.953	-1056.08		1000000747	120.712	60.3822	939.32		1000002016	172.481	228.712	-265.539
1000000421	314.294	135.607	-70.4643		1000001001	88.2175	267.771	-1056.08		1000000747	120.223	60.4745	940.992		1000002016	172.911	228.98	-261.934
1000000421	315.774	135.966	-70.1081		1000001001	88.0312	267.741	-1056.08		1000000747	119.861	59.4421	940.674		1000002016	172.026	228.613	-261.063
1000000421	315.665	135.206	-70.4298		1000001001	88.0724	267.48	-1056.08		1000000747	120.53	60.1647	941.26		1000002016	172.855	228.141	-262.403
1000000421	317.085	136.04	-69.3749		1000001001	87.87	267.75	-1056.08		1000000747	119.776	60.0525	941.68		1000002016	171.748	228.505	-262.283
1000000421	316.535	135.898	-68.24		1000001001	87.567	267.791	-1056.08		1000000747	120.315	59.5356	941.259		1000002016	172.16	228.587	-263.023
1000000421	316.579	135.313	-68.5962		1000001001	87.7063	267.656	-1056.08		1000000747	119.914	59.3636	941.892		1000002016	172.291	228.715	-263.64
1000000421	316.918	134.36	-67.9026		1000001001	87.4597	267.664	-1056.08		1000000747	119.956	59.0291	940.929		1000002016	172.42	229.097	-263.488
1000000421	316.935	135.04	-68.2363		1000001001	87.3725	267.871	-1056.08		1000000747	119.9	60.4704	940.677		1000002016	172.735	227.988	-261.889
1000000421	317.035	135.566	-67.7652		1000001001	88.3335	267.9	-1056.08		1000000747	120.009	60.1818	941.632		1000002016	172.244	228.467	-261.821
1000000421	316.602	136.013	-72.4986		1000001001	87.7204	267.727	-1056.08		1000000747	120.096	60.1349	941.439		1000002016	171.991	228.585	-261.67
1000000421	316.405	134.427	-72.9632		1000001001	88.5451	268.176	-1056.08		1000000747	119.695	59.2899	942.036		1000002016	171.888	227.466	-261.115
1000000421	315.129	134.648	-72.5716		1000001001	88.1158	267.94	-1056.08		1000000747	119.85	59.5695	941.152		1000002016	172.038	228.604	-261.004
1000000455	23.7213	214.037	-62.2311		1000001001	88.6522	267.971	-1056.08		1000000747	119.81	59.7612	940.652		1000002016	171.761	228.644	-260.165
1000000455	23.7134	214.295	-62.5326		1000001001	88.9722	267.837	-1050.56		1000000747	120.45	59.6462	941.249		1000002016	171.692	228.541	-259.562
1000000455	21.7086	211.724	-62.5193		1000001001	88.5711	267.612	-1056.08		1000000747	120.467	59.6307	941.271		1000002016	170.893	228.73	-260.789
1000000455	20.6009	210.418	-62.6652		1000001001	88.4913	267.774	-1056.08		1000000747	120.189	59.8482	941.127		1000002016	171.224	228.757	-265.167
1000000455	20.5312	210.388	-62.3428		1000001001	88.3564	267.805	-1056.08		1000000747	121.012	59.1596	941.373		1000002016	171.162	229.397	-264.752
1000000455	18.5898	208.751	-62.4094		1000001001	88.5337	267.653	-1056.08		1000000747	120.16	59.6968	940.838		1000002016	172.079	228.513	-263.47
1000000455	18.1859	208.036	-62.7516		1000001001	89.4127	267.949	-1056.08		1000000747	121.027	59.9432	941.184		1000002016	171.702	228.602	-263.887
1000000455	17.0407	208.265	-62.6432		1000001001	88.5661	268.184	-1056.08		1000000747	120.681	59.37	941.358		1000002016	171.619	229.74	-265.091
1000000455	15.1397	208.67	-62.7025		1000001001	88.6714	268.19	-1056.08		1000000747	120.699	59.3345	941.885		1000002016	171.155	229.686	-264.902
1000000455	13.9442	206.388	-67.7507		1000001001	88.3726	268.069	-1056.08		1000000747	120.89	58.8849	941.252		1000002016	171.055	230.397	-266.259
1000000455	13.5303	206.523	-68.383		1000001001	87.9205	268.062	-1056.08		1000000747	121.231	59.4962	941.114		1000002016	171.946	229.224	-261.106
1000000455	12.0757	204.61	-68.0514		1000001001	87.8536	268.133	-1050.49		1000000747	120.791	60.6152	941.485		1000002016	171.473	230.024	-261.021
1000000455	11.3834	203.708	-67.3272		1000001001	88.3493	268.076	-1050.54		1000000747	121.529	61.0722	939.726		1000002016	172.176	228.586	-261.184
1000000455	11.1543	202.996	-67.5002		1000001001	87.9726	268.158	-1050.63		1000000747	121.312	60.6715	940.224		1000002016	172.138	230.148	-265.147
1000000455	11.6382	203.342	-62.8203		1000001001	88.12	267.975	-1050.44		1000000747	120.638	61.1521	940.096		1000002016	171.687	228.934	-261.419
1000000455	11.4531	204.145	-62.674		1000001001	88.5618	268.134	-1050.68		1000000747	120.543	61.0702	940.942		1000002016	171.63	228.734	-260.916
1000000455	10.7703	202.968	-62.8645		1000001001	88.004	268.211	-1050.37		1000000747	121.29	60.1898	940.604		1000002016	171.213	228.644	-260.802
1000000455	9.86352	202.999	-62.9571		1000001001	87.904	268.337	-1050.47		1000000747	121.489	59.9769	941.574		1000002016	171.936	228.946	-261.695
1000000455	10.2921	203.499	-63.3248		1000001001	88.3301	267.969	-1050.44		1000000747	121.528	59.512	941.214		1000002016	172.152	229.459	-261.807
1000000455	9.30178	203.492	-67.6566		1000001001	88.1682	268.215	-1050.37		1000000747	120.859	60.2449	941.718		1000002016	172.254	228.934	-262.695
1000000455	8.61787	202.699	-67.9664		1000001001	87.9825	268.151	-1050.42		1000000747	120.828	59.065	941.404		1000002016	172.925	229.537	-262.578
1000000455	9.2648	202.948	-68.7673		1000001001	87.5359	268.046	-1050.65		1000000747	121.862	58.4399	942.103		1000002016	172.601	229.131	-262.982
1000000455	8.9049	200.575	-66.5553		1000001001	88.2918	268.458	-1050.06		1000000747	121.806	59.2196	942.008		1000002016	172.612	228.773	-262.368
1000000455	8.00479	200.337	-66.5724		1000001001	89.2817	268.247	-1050.51		1000000747	121.742	59.0423	941.847		1000002016	172.019	228.87	-261.88
1000000455	8.12405	199.365	-71.6605		1000001001	88.1392	267.895	-1050.46		1000000747	120.897	58.5511	941.388		1000002016	172.395	229.08	-261.094
1000000455	8.3463	200.066	-71.8982		1000001001	88.4635	267.984	-1050.42		1000000747	121.91	60.3141	941.247		1000002016	172.856	228.827	-261.056
1000000455	7.95668	199.199	-72.2876		1000001001	88.5472	267.849	-1050.69		1000000747	121.297	60.3965	941.633		1000002016	172.337	228.742	-261.295
1000000455	8.25583	199.879	-71.9425		1000001001	88.7099	268.264	-1050.22		1000000747	121.127	58.9619	941.179		1000002016	171.95	229.452	-260.429
1000000455	7.62749	198.369	-70.6355		1000001001	89.4204	268.009	-1050.6		1000000747	121.264	59.0319	941.808		1000002016	172.142	229.011	-264.285
1000000455	8.22823	196.327	-67.4314		1000001001	89.3129	268.063	-1050.71		1000000747	121.085	59.6542	941.801		1000002016	171.206	227.994	-266.054
1000000455	8.0643	198.277	-72.464		1000001001	89.3951	267.662	-1050.62		1000000747	121.919	59.2613	941.766		1000002016	172.143	227.992	-263.863
1000000455	8.08334	200.372	-68.2162		1000001001	89.277	268.095	-1049.84		1000000747	121.832	59.4832	942.01		1000002016	172.001	227.978	-263.579
1000000455	7.95801	199.223	-71.5891		1000001001	89.5495	268.116	-1050.5		1000000747	121.723	59.0745	942.358		1000002016	172.017	227.81	-263.243
1000000455	7.7651	199.692	-71.931		1000001001	89.2668	267.893	-1050.42		1000000747	120.803	59.1621	942.148		1000002016	171.934	227.146	-262.586
1000000455	7.76741	200.014	-72.2354		1000001001	89.0003	268.029	-1050.53		1000000747	121.229	59.4953	941.522		1000002016	172.146	227.196	-262.58
1000000455	8.73484	202.103	-68.776		1000001001	89.5079	268.11	-1050.42		1000000747	121.571	58.9099	942.023		1000002016	172.245	227.735	-263.635
1000000455	8.93612	202.071	-67.8584		1000001001	89.776	268.278	-1050.6		1000000747	121.628	59.2101	941.583		1000002016	172.83	228.477	-262.903
1000000455	8.92701	203.531	-67.4379		1000001001	89.512	267.838	-1050.32		1000000747	122.301	58.9272	941.919		1000002016	172.696	226.924	-263.181
1000000455	8.83853	202.384	-67.3371		1000001001	88.9245	268.22	-1050.64		1000000808	174.306	279.65	921.122		1000002016	172.824	227.981	-262.587
1000000607	274.681	298.999	-70.7675		1000001001	89.5758	268.122	-1050.47		1000000808	173.763	278.688	919.863		1000002016	173.022	228.035	-262.779
1000000607	274.627	296.893	-75.151		1000001001	89.919	268.131	-1050.79		1000000808	173.322	278.421	918.328		1000002016	173.062	227.272	-262.573
1000000607	274.559	296.323	-76.8068		1000001001	89.6546	268.191	-1050.07		1000000808	173.462	277.664	917.645		1000002016	172.613	227.567	-263.517
1000000607	273.481	294.876	-76.1309		1000001001	88.7788	267.701	-1050.48		1000000808	173.61	278.407	918.281		1000002016	171.741	227.646	-262.709
1000000607	274.135	295.972	-73.9572		1000001001	88.973	267.984	-1050.54		1000000808	173.094	278.008	918.479		1000002016	172.117	227.305	-262.773
1000000607	274.207	295.039	-73.7673		1000001001	88.7214	267.563	-1050.59		1000000808	173.416	278.812	919.098		1000002016	172.378	227.629	-262.572
1000000607	273.121	294.449	-76.9303		1000001001	88.751	266.902	-1050.51		1000000808	173.238	279.215	918.747		1000002016	173.447	227.544	-262.627
1000000607	272.901	294.128	-73.5308		1000001001	89.0531	267.913	-1050.58		1000000808	173.385	277.436	919.021		1000002016	171.807	227.82	-262.519
1000000607	273.477	294.294	-75.849		1000001001	88.6389	268.203	-1050.34		1000000808	173.22	278.197	918.915		1000002016	171.725	227.919	-262.594
1000000607	272.796	294.831	-76.0577		1000001001	89.4004	267.511	-1050.68		1000000808	173.277	278.55	917.9		1000002016	172.393	228.304	-262.36
1000000607	272.562	293.604	-75.8806		1000001001	88.619	267.874	-1050.17		1000000808	172.688	277.656	918.922		1000002016	172.023	227.904	-262.398
1000000607	272.305	294.352	-72.9122		1000001001	89.0446	268.467	-1050.13		1000000808	173.665	278.024	918.398		1000002016	172.408	228.202	-262.364
1000000607	271.915	293.025	-73.7929		1000001001	89.3351	267.843	-1050.66		1000000808	172.985	277.388	918.264		1000002016	172.276	227.735	-262.659
1000000607	272.791	294.938	-76.3837		1000001001	88.7509	268.334	-1050.45		1000000808	172.415	276.833	918.406		1000002016	172.341	227.714	-262.309
1000000607	272.161	293.625	-73.9274		1000001001	89.1358	267.954	-1050.69		1000000808	173.105	276.187	918.766		1000002016	172.666	227.928	-262.434
1000000607	272.695	293.898	-72.0886		1000001001	88.4647	267.989	-1050.64		1000000808	172.705	276.811	919.411		1000002016	171.953	228.421	-262.751
1000000607	271.829	293.119	-73.8468		1000001001	89.15	268.161	-1050.61		1000000808	173.103	276.93	918.362		1000002016	172.339	227.518	-262.243
1000000607	272	293.437	-74.0869		1000001001	88.4675	267.825	-1050.56		1000000808	172.879	278.019	917.884		1000002016	172.28	227.955	-262.62
1000000607	272.937	293.868	-73.8428		1000001001	89.45	268.05	-1050.43		1000000808	172.765	277.89	919.374		1000002016	171.328	228.678	-264.693
1000000607	273.74	294.36	-76.9984		1000001001	88.6303	267.914	-1050.49		1000000808	172.716	278.086	918.216		1000002016	172.763	227.273	-258.105
1000000652	87.4873	238.321	-67.1461		1000001001	88.0764	267.819	-1050.46		1000000808	173.443	277.455	919.732		1000002016	172.137	227.746	-258.376
1000000652	87.8725	238.404	-62.3683		1000001001	89.0278	267.983	-1050.6		1000000808	173.682	278.888	921.325		1000002016	172.207	227.237	-262.741
1000000652	90.7622	239.588	-67.4981		1000001001	88.9175	267.997	-1050.51		1000000808	172.865	278.145	918.344		1000002016	172.519	227.355	-262.138
1000000652	92.2754	239.625	-68.8283		1000001001	88.3121	268.375	-1050.47		1000000808	173.327	279.136	918.906		1000002016	171.771	227.507	-262.313
1000000652	94.0719	243.528	-71.6149		1000001001	88.4006	268.314	-1050.16		1000000808	173.351	279.478	918.462		1000002016	172.251	227.594	-262.156
1000000652	96.8285	244.894	-68.8156		1000001001	88.618	267.992	-1050.28		1000000826	319.171	246.792	922.663		1000002016	171.852	227.642	-262.215
1000000652	97.5178	243.921	-67.9894		1000001001	89.0355	267.931	-1050.29		1000000826	317.717	245.491	922.86		1000002016	171.959	227.648	-262.171
1000000652	96.0735	245.489	-70.6969		1000001001	88.1266	268.41	-1050.49		1000000826	313.437	249.749	919.175		1000002016	172.55	227.463	-262.219
1000000652	94.6754	249.253	-68.0826		1000001001	88.9667	268.324	-1050.5		1000000826	311.914	251.861	919.415		1000002016	171.861	227.623	-262.205
1000000652	94.9323	248.752	-67.5974		1000001001	88.5845	268.347	-1050.47		1000000826	310.771	253.072	918.033		1000002016	170.68	227.958	-262.072
1000000652	94.4558	247.309	-72.4131		1000001001	88.8622	268.193	-1050.31		1000000826	310.458	252.193	916.681		1000002016	172.254	227.361	-262.249
1000000652	95.3528	245.019	-72.7807		1000001001	89.1091	268.308	-1050.39		1000000826	307.768	254.643	913.873		1000002016	171.694	227.415	-262.41
1000000652	95.2119	244.87	-72.8076		1000001001	88.3848	267.637	-1050.58		1000000826	307.439	253.578	916.398		1000002016	171.136	227.572	-262.186
1000000652	94.6352	244.729	-73.8026		1000001001	88.6724	268.443	-1050.6		1000000826	307.757	254.835	913.889		1000002016	171.524	228.145	-262.328
1000000652	93.9173	247.63	-72.9083		1000001001	88.2455	268.665	-1050.47		1000000826	306.749	254.23	913.977		1000002016	171.983	227.588	-262.394
1000000652	93.934	246.574	-72.7535		1000001001	88.2741	268.737	-1049.98		1000000826	308.084	254.006	915.969		1000002016	172.05	226.915	-262.169
1000000652	93.7095	248.342	-72.8479		1000001001	88.0115	267.925	-1050.78		1000000826	307.799	254.739	914.396		1000002016	171.538	228.235	-262.199
1000000652	93.8396	248.6	-72.7596		1000001001	87.1327	268.111	-1050.54		1000000826	307.319	254.378	916.273		1000002016	172.311	227.311	-262.129
1000000652	93.9445	251.989	-72.3756		1000001001	88.1698	267.85	-1050.47		1000000826	307.256	254.211	914.355		1000002016	171.116	228.011	-262.137
1000000652	94.0383	252.111	-67.4856		1000001001	88.7448	268.093	-1050.31		1000000826	307.703	254.059	914.019		1000002016	171.86	227.823	-262.468
1000000652	93.9727	251.41	-67.511		1000001001	88.6628	268.049	-1050.36		1000000826	307.109	253.338	916.024		1000002016	172.103	227.032	-262.853
1000000652	93.9183	251.574	-67.4576		1000001001	87.7558	267.756	-1050.55		1000000826	308.015	253.061	915.82		1000002016	172.152	227.805	-262.631
1000000652	93.5377	252.813	-67.732		1000001001	89.3078	267.869	-1050.78		1000000826	307.33	253.732	916.281		1000002016	172.231	226.471	-262.38
1000000652	94.1479	251.832	-67.7225		1000001001	88.9538	267.677	-1049.85		1000000826	307.575	253.615	913.794		1000002016	173.491	226.857	-262.252
1000000652	93.7577	251.228	-67.5065		1000001001	89.4641	267.68	-1050.38		1000000826	307.39	254.377	913.171		1000002016	171.799	227.154	-262.258
1000000652	94.7423	252.207	-67.7105		1000001001	89.2355	267.48	-1050.82		1000000826	308.002	254.717	914.114		1000002016	172.561	227.623	-262.467
1000000652	94.0483	251.242	-68.3449		1000001001	89.632	267.088	-1050.44		1000000826	308.022	253.922	915.558		1000002016	172.041	227.817	-262.222
1000000652	94.4155	249.473	-70.8591		1000001002	158.863	158.434	-1035.69		1000000826	307.684	254.056	915.882		1000002016	172.196	227.628	-262.194
1000000652	94.2049	250.678	-68.3059		1000001002	158.673	158.136	-1035.59		1000000826	308.673	254.424	914.17		1000002016	172.775	227.459	-262.421
1000000652	94.9106	250.448	-68.4526		1000001002	158.732	158.185	-1035.96		1000000826	307.56	255.928	913.378		1000002016	172.876	226.965	-262.266
1000000652	95.0971	250.668	-67.7813		1000001002	158.492	157.81	-1035.66		1000000826	308.459	254.858	915.054		1000002016	173.331	228.333	-262.373
1000000652	95.2331	249.609	-68.0368		1000001002	157.675	156.688	-1037.03		1000000826	308.079	253.697	917.02		1000002016	172.012	228.703	-262.396
1000000652	94.7715	249.623	-68.232		1000001002	157.927	157.534	-1036.01		1000000826	307.04	254.652	913.56		1000002016	172.382	228.948	-262.362
1000000652	95.3186	249.658	-68.7484		1000001002	157.828	157.353	-1037.15		1000000826	308.052	254.363	913.882		1000002016	171.684	228.718	-267.439
1000000652	95.0203	248.99	-68.4446		1000001002	158.389	157.496	-1036.88		1000000826	307.772	253.499	915.569		1000002016	172.565	228.684	-262.284
1000000652	95.5269	247.648	-68.7942		1000001002	157.544	157.022	-1036.46		1000000826	308.815	254.937	916.724		1000002016	171.623	228.412	-267.147
1000000652	95.9494	248.702	-68.0892		1000001002	156.37	156.463	-1037.31		1000000826	308.222	253.35	916.733		1000002016	172.005	228.813	-267.357
1000000652	95.2698	249.362	-67.6894		1000001002	156.714	156.533	-1035.89		1000000826	308.049	254.593	916.06		1000002016	172.215	228.042	-262.514
1000000652	95.422	249.442	-68.4636		1000001002	156.059	155.487	-1036.02		1000000826	307.626	254.089	916.469		1000002016	171.735	227.007	-267.305
1000000652	95.254	249.519	-67.5077		1000001002	157.119	156.835	-1035.68		1000000826	308.239	252.926	916.566		1000002016	171.474	230.071	-262.441
1000000652	95.2909	250.109	-67.531		1000001002	156.477	155.768	-1035.59		1000000826	307.884	253.431	917.323		1000002016	171.487	228.712	-267.174
1000000748	8.41029	202.502	-72.9251		1000001002	156.384	156.035	-1036.34		1000000826	307.141	252.563	917.115		1000002016	171.293	229.752	-267.36
1000000748	8.33665	202.773	-72.2775		1000001002	156.415	156.066	-1036.21		1000000826	307.578	253.565	917.318		1000002016	170.706	230.064	-262.205
1000000748	8.59495	202.589	-72.404		1000001002	156.302	155.935	-1036.68		1000000826	307.805	252.592	917.76		1000002016	171.544	228.039	-262.25
1000000748	7.49927	201.354	-72.5586		1000001002	156.693	155.775	-1036.71		1000000826	307.62	252.023	917.239		1000002016	171.256	228.509	-267.355
1000000748	8.16002	200.699	-72.9979		1000001002	157.221	156.735	-1040.47		1000000826	307.415	252.336	917.719		1000002016	171.378	228.396	-267.406
1000000748	7.99245	200.667	-68.7992		1000001002	157.743	157.045	-1038.78		1000000826	306.779	251.013	917.271		1000002016	171.211	228.141	-267.454
1000000748	8.10057	200.272	-72.4234		1000001002	157.827	157.05	-1040.1		1000000826	307.364	251.066	917.332		1000002016	171.829	228.749	-267.54
1000000748	8.02009	199.769	-74.7268		1000001002	157.995	156.959	-1040.54		1000000826	307.588	251.07	917.657		1000002016	171.57	228.891	-267.327
1000000748	7.96966	201.247	-75.1409		1000001002	157.621	157.532	-1040.7		1000000826	307.558	250.047	918.103		1000002016	171.133	229.52	-267.319
1000000748	7.85297	201.152	-71.434		1000001002	157.356	156.726	-1040.72		1000000826	307.484	248.687	918.709		1000002016	171.296	228.932	-267.135
1000000748	8.2243	202.014	-68.2379		1000001002	157.918	156.662	-1042.26		1000000826	306.858	242.73	923.42		1000002016	171.622	229.763	-267.233
1000000748	9.0879	201.989	-68.0802		1000001002	157.979	157.613	-1040.98		1000000826	305.214	241.32	923.331		1000002016	171.844	228.906	-267.496
1000000748	8.77431	201.942	-68.3967		1000001002	157.423	156.169	-1040.39		1000000826	303.451	241.129	926.412		1000002016	172.12	229.362	-262.147
1000000748	9.45537	202.33	-67.4449		1000001002	157.51	156.98	-1041		1000000826	302.435	243.445	927.269		1000002016	171.614	229.54	-262.302
1000000748	9.58039	203.832	-67.9764		1000001002	156.883	156.685	-1041.4		1000000826	301.256	243.117	928.237		1000002483	142.444	252.72	-271.67
1000000748	10.195	203.198	-67.894		1000001002	157.553	156.594	-1040.32		1000000826	302.101	244.319	929.862		1000002483	141.112	247.477	-268.75
1000000748	9.83036	203.186	-67.5439		1000001002	157.615	156.955	-1041.01		1000000826	300.77	244.862	933.208		1000002483	140.728	245.738	-270.879
1000000748	9.1947	202.866	-67.4857		1000001002	158.377	157.121	-1040.55		1000000826	300.457	245.602	934.584		1000002483	141.593	245.341	-271.581
1000000748	9.25552	202.722	-67.6491		1000001002	157.975	157.222	-1040.71		1000000826	301.349	248.968	938.532		1000002483	141.626	243.601	-271.571
1000000748	8.90996	202.8	-67.5034		1000001002	158.071	156.637	-1040.25		1000000826	302.59	249.754	937.072		1000002483	141.466	243.776	-270.496
1000000748	9.02298	202.554	-67.5134		1000001002	157.992	156.673	-1040.7		1000000826	302.009	249.255	939.335		1000002483	141.272	243.029	-270.067
1000000748	9.37853	202.583	-67.5547		1000001002	157.878	156.619	-1040.88		1000000826	302.334	249.831	938.002		1000002483	140.481	242.876	-270.961
1000000748	8.99977	202.742	-67.5487		1000001002	157.166	156.4	-1040.83		1000000826	302.988	250.389	938.728		1000002483	139.525	243.387	-271.317
1000000748	9.57252	202.662	-67.6865		1000001002	157.445	156.424	-1040.93		1000000826	303.83	251.57	933.099		1000002483	137.75	244.819	-275.149
1000000748	9.38091	201.445	-67.3172		1000001002	157.512	156.161	-1040.97		1000000826	303.775	251.192	931.446		1000002483	136.941	245.373	-275.396
1000000748	9.22636	202.742	-67.446		1000001002	157.341	156.623	-1041.02		1000000826	304.012	251.246	937.75		1000002483	135.798	246.418	-276.207
1000000748	9.2001	202.863	-68.0108		1000001002	157.957	155.997	-1041.41		1000000826	303.585	249.605	930.656		1000002483	133.968	248.502	-275.579
1000000748	9.34839	203.061	-67.6471		1000001002	158.024	156.515	-1041.52		1000000826	303.476	248.591	933.185		1000002483	130.876	249.641	-276.234
1000000748	9.56664	203.389	-67.7174		1000001002	157.245	155.965	-1040.93		1000000826	304.361	248.917	934.744		1000002483	128.622	250.116	-276.337
1000000748	9.97945	203.143	-68.4152		1000001002	157.874	156.658	-1040.94		1000000826	303.387	247.615	927.617		1000002483	126.256	250.928	-275.821
1000000748	10.6992	203.459	-68.2471		1000001002	157.658	155.944	-1040.84		1000000826	303.812	247.325	928.105		1000002483	126.057	250.672	-273.035
1000000748	10.4827	203.298	-68.5497		1000001002	157.038	155.528	-1036.29		1000000826	303.372	248.857	927.544		1000002483	125.383	249.878	-273.36
1000000748	10.9203	203.079	-68.8168		1000001002	157.572	156.214	-1041.3		1000000826	303.086	248.732	928.65		1000002483	124.493	249.001	-276.946
1000000748	10.1216	201.843	-68.5959		1000001002	157.837	156.074	-1040.93		1000000826	302.625	249.98	932.997		1000002483	126.269	249.23	-276.784
1000000748	11.112	202.662	-68.2663		1000001002	157.71	156.279	-1041.5		1000000826	303.113	250.302	932.813		1000002483	126.4	248.497	-276.69
1000000748	10.8373	203.192	-67.5319		1000001002	158.007	155.751	-1041.23		1000000887	-0.662	203.996	932.92		1000002483	125.981	249.221	-276.571
1000000748	10.9158	203.27	-72.3255		1000001002	158.189	156.052	-1041.05		1000000887	-0.662	203.445	935.872		1000002483	126.268	248.818	-273.804
1000000748	10.8238	201.399	-72.6347		1000001002	157.32	156.322	-1041.91		1000000887	-0.662	204.32	934.933		1000002483	125.606	248.054	-272.139
1000000748	10.4437	201.293	-72.4247		1000001002	157.496	156.085	-1041.05		1000000887	-0.662	204.832	932.877		1000002483	125.969	248.03	-271.748
1000000748	9.77701	201.323	-72.9516		1000001002	158.013	155.966	-1042.64		1000000887	-0.662	203.226	933.757		1000002483	127.99	247.027	-271.782
1000000748	9.92677	201.289	-72.6459		1000001002	157.951	156.278	-1041.2		1000000887	-0.662	204.991	934.867		1000002483	127.838	247.143	-272.096
1000000748	9.57484	201.741	-72.7247		1000001002	157.346	155.537	-1036.69		1000000887	-0.662	204.027	935.977		1000002483	129.75	246.951	-271.834
1000000807	265.047	286.552	-70.2831		1000001002	157.602	156.029	-1036.67		1000000887	-0.662	204.592	933.214		1000002483	129.718	247.203	-272.234
1000000807	265.941	287.207	-70.8672		1000001002	155.973	155.673	-1036.75		1000000887	-0.662	203.88	935.338		1000002483	131.07	248.055	-272.471
1000000807	264.085	289.388	-70.1791		1000001002	157.003	156.186	-1037.28		1000000887	-0.662	205.363	933.079		1000002483	132.125	247.817	-271.782
1000000807	264.616	288.632	-70.4685		1000001002	155.915	155.073	-1035.67		1000000887	-0.662	204.854	932.598		1000002483	133.323	247.246	-271.757
1000000807	264.268	289.109	-70.9384		1000001002	156.855	155.548	-1036.28		1000000887	-0.662	204.273	934.176		1000002483	133.993	248.379	-268.091
1000000807	264.237	288.359	-71.2331		1000001002	156.341	155.709	-1036.73		1000000887	-0.662	205.1	935.206		1000002483	133.809	248.898	-267.469
1000000807	265.297	288.885	-70.2507		1000001002	156.303	155.569	-1036.46		1000000887	-0.662	206.14	934.217		1000002483	133.997	249.392	-267.466
1000000807	264.956	288.337	-70.7024		1000001002	156.856	155.37	-1037.7		1000000887	-0.662	204.509	933.346		1000002483	134.158	249.887	-268.149
1000000807	263.284	287.664	-69.1997		1000001002	157.16	155.827	-1037.09		1000000887	-0.203021	204.802	934.062		1000002483	133.378	250.952	-266.219
1000000807	263.72	287.566	-70.8514		1000001002	156.408	155.797	-1036.63		1000000887	-0.662	204.552	934.796		1000002483	131.24	252.042	-266.362
1000000807	265.726	287.838	-70.1139		1000001002	157.165	156.671	-1036.4		1000000887	-0.662	204.124	934.039		1000002483	132.245	251.804	-270.887
1000000807	264.216	286.645	-70.333		1000001002	158.128	156.061	-1039.18		1000000887	-0.662	200.568	935.386		1000002483	132.261	251.958	-271.003
1000000807	265.32	288.663	-68.3292		1000001002	157.15	155.599	-1036.91		1000000887	-0.662	200.782	936.913		1000002483	133.848	250.888	-270.082
1000000807	264.166	287.992	-69.3492		1000001002	156.849	155.844	-1037.22		1000000887	-0.662	198.182	935.705		1000002483	134.386	249.697	-270.12
1000000807	264.054	288.758	-69.7899		1000001002	157.561	155.138	-1037.58		1000000887	-0.662	199.034	937.654		1000002483	135.195	248.79	-269.809
1000000807	264.529	287.449	-70.4514		1000001002	158.228	155.403	-1039.31		1000000887	-0.662	198.197	937.158		1000002483	136.132	248.477	-270.775
1000000807	267.346	290.333	-69.4115		1000001002	158.761	155.045	-1039.2		1000000887	-0.662	198.924	937.275		1000002483	138.189	246.989	-270.733
1000000807	269.405	293.66	-70.6605		1000001002	157.461	154.966	-1036.7		1000000887	-0.662	198.834	937.669		1000002483	138.485	246.355	-271.219
1000000807	269.381	294.665	-70.5421		1000001002	158.519	154.977	-1039.94		1000000887	-0.662	198.233	937.526		1000002483	139.149	244.172	-271.486
1000000807	269.834	294.648	-70.0949		1000001002	157.526	154.312	-1037.88		1000000887	-0.662	198.637	937.835		1000002483	139.575	243.392	-271.76
1000000807	269.535	294.563	-70.0148		1000001002	157.43	154.786	-1037.71		1000000900	35.9376	191.766	941.612		1000002483	140.184	241.111	-272.991
1000000807	269.826	295.622	-68.7018		1000001002	158.816	154.177	-1037.05		1000000900	35.77	191.878	941.66		1000002483	139.886	238.897	-275.919
1000000807	269.586	296.42	-68.864		1000001002	159.572	155.855	-1040.03		1000000900	34.2178	190.864	941.958		1000002483	139.923	239.159	-275.964
1000000807	268.669	296.274	-73.3745		1000001002	158.698	155.674	-1039.93		1000000900	32.4142	189.747	941.966		1000002483	139.681	238.769	-275.951
1000000807	268.15	297.601	-72.445		1000001002	159.3	156.207	-1039.84		1000000900	31.727	188.24	942.062		1000002483	139.232	238.704	-276.06
1000000807	268.67	296.989	-72.2743		1000001002	158.464	156.305	-1040.63		1000000900	30.2811	188.529	942.237		1000002483	139.574	238.327	-276.446
1000000807	267.911	297.437	-72.3075		1000001002	158.518	156.727	-1039.95		1000000900	29.7814	187.477	941.431		1000002483	138.301	238.141	-277.257
1000000807	267.359	297.567	-72.2096		1000001002	158.315	156.824	-1040.81		1000000900	29.3366	187.11	941.56		1000002483	139.208	237.24	-276.74
1000000807	267.408	297.254	-73.391		1000001002	159.213	157.702	-1040.35		1000000900	29.0847	185.461	941.946		1000002483	138.603	237.813	-276.485
1000000807	267.27	297.49	-73.9494		1000001002	158.833	157.994	-1041.27		1000000900	28.5218	183.923	941.307		1000002483	139.563	236.835	-276.404
1000000807	266.46	297.872	-73.406		1000001002	159.447	156.719	-1040.7		1000000900	28.7078	184.45	941.866		1000002483	139.722	236.519	-277.222
1000000807	268.49	297.731	-68.4044		1000001002	160.034	158.891	-1041.71		1000000900	28.1474	182.831	941.155		1000002483	140.001	236.525	-277.687
1000000807	267.045	298.835	-73.1458		1000001002	159.727	158.294	-1041.51		1000000900	28.1118	182.819	941.028		1000002483	139.957	235.809	-276.177
1000000807	264.848	298.778	-75.1389		1000001002	159.348	156.608	-1041.26		1000000900	28.0241	181.985	941.336		1000002483	139.687	235.693	-275.883
1000000807	264.664	298.714	-70.8794		1000001002	159.826	157.806	-1041.01		1000000900	27.2896	180.95	940.798		1000002483	140.023	235.855	-275.565
1000000807	263.463	296.874	-71.7003		1000001002	159.923	157.701	-1041.48		1000000900	28.2841	181.762	940.756		1000002483	139.427	236.097	-274.607
1000000807	261.843	296.183	-74.8719		1000001002	160.378	158.423	-1041.57		1000000900	28.5924	181.308	941.957		1000002483	139.58	237.159	-275.38
1000000807	260.84	295.094	-72.4881		1000001002	160.335	158.12	-1041.29		1000000900	28.1452	180.856	941.565		1000002483	138.99	237.564	-276.219
1000000807	260.221	295.606	-72.1208		1000001002	160.102	157.449	-1041.91		1000000900	28.3614	180.65	941.644		1000002483	139.683	237.446	-275.687
1000000807	259.614	296.088	-72.755		1000001002	160.332	157.581	-1041.14		1000000900	27.7045	180.797	941.438		1000002483	139.284	237.449	-276.26
1000000807	259.862	294.364	-76.6378		1000001002	160.342	158.41	-1041.18		1000000900	28.0375	180.368	940.785		1000002483	139.208	236.75	-281.147
1000000807	259.908	294.689	-76.8124		1000001002	160.305	158.183	-1040.92		1000000900	28.3944	179.651	941.457		1000002483	139.285	237.231	-281.009
1000000807	259.978	295.156	-72.4285		1000001002	160.04	158.372	-1041.08		1000000900	28.1074	179.893	941.6		1000002483	139.073	237.257	-280.643
1000000807	259.686	294.587	-72.1653		1000001002	160.286	158.203	-1041.22		1000000900	28.0912	180.076	941.663		1000002483	139.037	236.834	-280.566
1000000807	260.423	293.941	-71.7886		1000001002	159.799	158.58	-1040.82		1000000900	28.0094	179.959	941.919		1000002483	138.476	237.474	-281.745
1000000807	259.571	295.942	-76.6632		1000001002	160.55	158.521	-1039.94		1000000900	28.4743	180.38	941.605		1000002483	138.72	237.496	-281.304
1000000807	259.39	294.533	-76.3307		1000001002	160.638	158.837	-1040.7		1000000900	28.3657	180.537	942.136		1000002483	138.427	237.784	-283.062
1000000807	259.817	293.87	-76.4359		1000001002	160.215	158.065	-1041.07		1000000900	28.1914	180.672	941.407		1000002483	135.956	238.775	-281.137
1000000807	259.345	295.324	-76.7133		1000001002	160.746	158.71	-1040.97		1000000900	27.4439	180.996	941.499		1000002483	135.689	239.102	-283.214
1000000807	260.203	294.408	-76.3697		1000001002	160.209	158.521	-1041.19		1000000900	27.297	180.541	941.318		1000002483	135.327	239.298	-282.525
1000000807	259.527	295.551	-76.6292		1000001002	160.394	158.153	-1042.16		1000000900	27.2369	180.703	941.071		1000002483	135.419	239.511	-287.64
1000000807	259.751	295.404	-76.5513		1000001002	160.733	158.345	-1040.92		1000000900	26.159	180.012	940.732		1000002483	136.414	239.816	-285.973
1000000807	258.512	296.624	-76.2065		1000001002	160.994	158.445	-1040.96		1000000900	24.0872	179.174	938.164		1000002483	137.245	239.336	-286.428
1000000807	259.889	295.924	-73.9024		1000001002	160.95	158.048	-1041.02		1000000900	23.428	178.86	938.81		1000002483	137.786	239.449	-285.889
1000000807	259.479	295.231	-73.8237		1000001002	161.127	158.905	-1041.6		1000000900	24.1604	179.756	938.412		1000002483	137.858	239.645	-286.82
1000000807	258.68	296.758	-74.1786		1000001002	161.492	158.269	-1039.76		1000000900	23.9467	178.584	939.034		1000002483	137.051	239.628	-287.455
1000000807	258.487	295.83	-74.1541		1000001002	161.165	159.037	-1041.69		1000000900	22.1201	178.09	936.666		1000002483	135.623	239.398	-287.165
1000000807	258.612	296.683	-74.3966		1000001002	160.972	158.684	-1041.93		1000000900	21.7855	177.99	937.653		1000002483	139.496	240.266	-291.226
1000000835	282.984	337.083	-70.5208		1000001002	161.339	158.958	-1040.86		1000000900	23.2776	178.521	938.145		1000002483	139.225	240.886	-291.285
1000000835	282.617	334.534	-68.7879		1000001002	161.169	159.006	-1041.59		1000000900	23.0765	179.426	939.429		1000002483	139.777	240.105	-291.509
1000000835	283.875	331.731	-67.6203		1000001002	161.612	158.096	-1042.01		1000000900	23.2334	179.475	939.08		1000002483	136.789	240.596	-287.692
1000000835	284.551	328.119	-67.3428		1000001002	161.167	157.928	-1042.3		1000000900	24.6011	180.721	941.19		1000002483	137.544	240.411	-287.239
1000000835	285.152	325.54	-67.2972		1000001002	161.181	158.453	-1041.58		1000000900	24.8928	180.309	941.106		1000002483	138.304	240.946	-287.013
1000000835	286.692	321.125	-67.2703		1000001002	161.199	158.485	-1041.2		1000000900	24.2628	179.429	938.667		1000002483	138.421	240.899	-286.585
1000000835	287.358	319.128	-67.9254		1000001002	160.995	158.527	-1041.6		1000000900	25.2124	180.607	940.895		1000002483	137.267	240.824	-286.403
1000000835	289.004	317.826	-67.9321		1000001002	161.067	158.471	-1042.29		1000000900	25.3816	180.211	941.126		1000002483	138.359	241.183	-291.646
1000000835	292.678	314.766	-69.9268		1000001002	160.784	157.907	-1042.84		1000000900	23.332	178.348	938.538		1000002483	138.343	241.194	-290.751
1000000835	294.144	314.883	-71.6212		1000001002	160.58	158.16	-1042.63		1000000900	23.6223	178.649	935.005		1000002483	138.158	241.181	-290.844
1000000835	295.46	316.703	-68.9848		1000001002	160.964	158.444	-1041.78		1000000900	24.3755	179.265	935.017		1000002483	137.313	240.73	-289.727
1000000835	295.887	316.382	-69.2249		1000001002	160.489	158.27	-1041.17		1000000900	24.165	178.525	939.702		1000002483	136.098	240.194	-288.009
1000000835	297.524	316.784	-67.6329		1000001002	159.534	158.104	-1041.48		1000000900	24.2271	178.967	934.402		1000002483	136.408	239.912	-287.585
1000000835	297.129	317.074	-70.278		1000001188	247.189	105.582	-1048.96		1000000900	25.7682	180.29	941.187		1000002483	136.763	239.87	-286.679
1000000835	297.807	316.97	-71.0764		1000001188	246.74	104.015	-1045.43		1000000900	25.777	180.313	941.623		1000002642	169.541	311.984	-296.479
1000000835	297.228	317.149	-71.3922		1000001188	245.576	104.049	-1045.89		1000000900	25.4654	179.793	936.651		1000002642	170.075	312.058	-296.359
1000000835	298.113	318.109	-70.296		1000001188	246.226	104.029	-1044.64		1000000900	26.4563	180.494	936.049		1000002642	170.182	312.106	-296.497
1000000835	299.903	319.136	-68.637		1000001188	245.989	103.809	-1046.49		1000000900	25.045	180.364	936.277		1000002642	170.361	312.521	-296.506
1000000835	300.061	320.494	-67.9854		1000001188	245.474	105.467	-1049.02		1000000900	24.7979	179.952	935.814		1000002642	170.33	312.516	-296.409
1000000835	301.382	322.365	-67.7826		1000001188	244.724	105.909	-1048.87		1000000900	25.6315	180.856	940.582		1000002642	170.41	312.222	-296.619
1000000835	302.475	324.595	-67.9442		1000001188	244.138	108.068	-1049.13		1000000900	26.4882	179.898	941.397		1000002642	170.027	311.236	-296.34
1000000835	302.849	325.18	-67.6657		1000001188	245.396	106.006	-1047.05		1000000943	232.677	123.354	915.01		1000002642	170.019	312	-296.1
1000000835	303.406	326.225	-67.569		1000001188	245.279	107.39	-1048.84		1000000943	232.434	123.782	917.761		1000002642	169.482	312.183	-296.48
1000000835	302.74	325.72	-67.6496		1000001188	245.965	106.667	-1046.6		1000000943	234.351	123.265	917.981		1000002642	170.348	312.146	-296.152
1000000835	301.699	326.507	-72.7705		1000001188	245.401	109.006	-1046.51		1000000943	233.288	123.869	917.562		1000002642	169.313	312.352	-296.472
1000000835	300.78	325.429	-72.467		1000001188	245.437	108.014	-1046.21		1000000943	234.606	124.312	917.651		1000002642	169.832	312.055	-296.535
1000000835	301.076	325.173	-73.4019		1000001219	39.7874	68.9267	-1006.34		1000000943	231.446	125.047	916.65		1000002642	170.19	311.87	-296.631
1000000873	318.589	275.906	-67.163		1000001219	39.9304	68.2962	-1006.34		1000000943	231.414	124.969	916.328		1000002642	170.034	311.655	-296.626
1000000873	318.707	278.104	-67.5475		1000001219	39.5864	67.9716	-1006.38		1000000943	235.435	123.811	916.376		1000002642	170.78	311.883	-296.211
1000000873	321.018	281.043	-71.066		1000001219	39.4044	68.9405	-1006.37		1000000943	235.43	122.508	916.813		1000002642	169.994	312.077	-296.402
1000000873	321.761	283.33	-71.3037		1000001219	39.1394	68.9523	-1006.27		1000000943	235.615	122.047	917.908		1000002642	169.126	311.242	-296.669
1000000873	323.002	285.342	-71.9158		1000001219	38.9889	68.9975	-1006.28		1000000943	236.6	120.446	918.026		1000002642	169.951	312.189	-296.578
1000000873	323.082	286.288	-71.6531		1000001219	38.7972	69.7187	-1006.35		1000000943	235.209	121.957	918.055		1000002642	169.195	311.981	-296.592
1000000873	324.847	289.345	-71.3213		1000001219	38.8579	69.4129	-1006.36		1000000943	234.675	122.5	917.976		1000002642	169.17	311.777	-296.38
1000000873	326.95	289.513	-71.4418		1000001219	39.0008	69.94	-1006.29		1000000943	233.094	122.85	918.032		1000002642	169.763	311.897	-296.54
1000000873	326.968	290.235	-72.3694		1000001219	39.0788	69.7785	-1006.37		1000000943	233.689	122.448	918.35		1000002642	169.464	311.565	-296.63
1000000873	326.51	291.079	-71.9137		1000001219	39.8061	69.5745	-1006.39		1000000943	233.795	122.818	917.926		1000002642	170.544	311.772	-296.507
1000000873	327.11	292.599	-72.3602		1000001219	39.5062	70.295	-1006.22		1000000943	233.702	123.113	918.253		1000002642	169.615	311.179	-296.608
1000000873	326.328	291.946	-71.6183		1000001219	39.1781	69.3069	-1006.27		1000000943	234.426	123.027	918.428		1000002642	170.309	312.24	-296.474
1000000873	326.231	289.288	-71.7155		1000001219	39.324	69.3776	-1006.38		1000000943	234.198	122.141	918.075		1000002642	170.397	312.09	-296.533
1000000873	327.181	288.577	-72.32		1000001281	39.4883	69.2095	-1006.22		1000000943	233.265	123.332	918.297		1000002642	170.56	312.144	-296.615
1000000873	327.088	288.913	-72.1004		1000001281	39.3588	69.0864	-1006.23		1000000943	233.611	123.414	918.381		1000002642	170.284	311.91	-296.583
1000000873	328.201	288.497	-71.9474		1000001281	39.2045	68.6581	-1006.47		1000000943	234.028	123.264	918.328		1000002642	170.408	311.92	-296.474
1000000873	328.717	288.475	-71.9545		1000001281	39.0024	68.7924	-1006.32		1000000943	234.036	122.842	917.888		1000002642	170.541	311.74	-296.321
1000000873	329.164	287.946	-71.8763		1000001281	40.1745	69.3227	-1006.3		1000000943	234.072	123.04	917.952		1000002642	170.546	311.788	-296.493
1000000873	327.962	287.161	-71.6372		1000001281	40.2635	69.8596	-1006.13		1000000943	233.945	123.029	918.771		1000002642	170.594	311.529	-296.612
1000000873	327.614	287.502	-73.9301		1000001281	40.0266	69.2212	-1006.21		1000000943	233.146	123.409	917.862		1000002642	169.461	311.814	-296.626
1000000873	326.623	287.472	-73.4982		1000001281	39.1118	68.5962	-1006.17		1000000943	234.624	123.794	918.65		1000002642	170.075	312.545	-301.525
1000000873	327.263	288.539	-73.0168		1000001281	40.151	69.6367	-1006.27		1000000943	234.322	123.632	918.015		1000002642	170.177	311.678	-300.655
1000000873	326.876	287.799	-72.4855		1000001281	39.7956	69.7035	-1006.37		1000000943	234.119	122.998	918.228		1000002642	170.048	311.752	-300.576
1000000873	328.236	290.722	-72.52		1000001281	39.5961	69.6759	-1006.33		1000000943	233.612	122.61	918.206		1000002642	169.818	312.126	-299.186
1000000873	327.643	289.868	-75.8823		1000001281	39.9451	69.1587	-1006.15		1000000943	233.667	123.222	918.585		1000002642	169.727	311.621	-299.835
1000000873	326.725	288.806	-76.1454		1000001281	39.8158	69.7065	-1006.24		1000000943	234.64	123.659	918.617		1000002642	169.922	312.003	-297.628
1000000873	326.406	290.988	-76.0895		1000001281	39.8406	69.2548	-1006.23		1000000943	232.752	123.251	919.337		1000002642	169.714	311.68	-298.26
1000000873	327.033	290.549	-69.4078		1000001281	40.0515	69.2497	-1006.35		1000000943	233.65	123.736	918.563		1000002642	170.109	311.401	-297.181
1000000873	325.78	291.805	-76.1459		1000000200	310.516	1.59197	-1090.05		1000000943	233.65	123.794	918.413		1000002642	169.894	311.581	-297.744
1000000873	326.379	292.62	-71.1153		1000000200	311.32	2.12965	-1089.21		1000000943	233.338	123.246	918.604		1000002642	169.428	311.804	-297.185
1000000873	326.817	292.185	-70.9216		1000000200	310.11	2.07148	-1086.95		1000000943	234.49	123.189	918.196		1000002642	169.993	312.005	-297.281
1000000873	327.301	292.059	-73.7446		1000000200	310.428	2.25344	-1087.15		1000000943	233.574	123.173	919.589		1000002642	169.289	311.829	-297.632
1000000873	327.843	293.308	-71.9128		1000000200	310.43	2.23112	-1089.44		1000000943	233.049	123.611	918.877		1000002642	169.5	311.943	-297.825
1000000873	327.356	293.722	-71.9865		1000000200	310.521	2.62102	-1090.11		1000000943	233.795	123.311	918.791		1000002642	169.236	312.007	-297.313
1000000873	327.038	292.542	-70.8562		1000000200	309.798	2.17779	-1090.76		1000000943	233.491	123.927	915.028		1000002642	170.301	312.113	-297.517
1000000873	327.105	291.764	-75.5076		1000000200	310.25	2.75015	-1091.3		1000000943	233.748	123.061	917.436		1000002642	169.772	311.755	-299.84
1000000873	326.805	293.1	-75.4346		1000000200	309.865	-0.662	-1090.19		1000000943	234.207	123.754	921.37		1000002642	169.51	311.942	-296.474
1000000873	327.124	292.625	-71.2153		1000000200	309.954	-0.662	-1091.81		1000000943	233.804	122.376	913.632		1000002642	170.042	312.035	-296.557
1000000873	326.677	290.946	-71.1456		1000000200	309.623	-0.662	-1090.75		1000000943	234.228	122.72	918.233		1000002642	169.548	312.011	-300.806
1000000873	326.738	292.052	-71.4499		1000000200	310.789	-0.662	-1090.79		1000000943	234.946	123.006	920.324		1000002642	170.07	311.77	-297.268
1000000873	326.194	291.054	-76.2532		1000000200	309.716	1.18226	-1090.39		1000000943	234.055	123.307	914.339		1000002642	170.343	311.697	-297.801
1000000873	326.369	291.18	-75.4662		1000000200	309.743	-0.662	-1092.06		1000000943	234.35	122.496	913.703		1000002642	170.465	311.497	-300.986
1000000873	326.365	292.368	-74.8874		1000000200	310.085	-0.662	-1092.19		1000000943	234.248	122.805	913.965		1000002642	170.688	312.238	-300.978
1000000873	326.775	292.58	-73.2868		1000000200	311.095	-0.662	-1091.38		1000000943	234.929	123.424	914.485		1000002642	170.041	311.798	-297.582
1000000873	327.42	292.743	-76.019		1000000200	310.945	-0.662	-1094.77		1000000943	234.5	122.713	919.461		1000002642	170.094	311.603	-296.89
1000000873	326.775	292.79	-73.9187		1000000200	310.937	-0.662	-1091.85		1000000943	234.743	122.3	918.803		1000002642	168.979	311.148	-296.716
1000000873	327.444	293.139	-72.7395		1000000200	309.902	-0.662	-1091.85		1000001057	300.333	176.542	927.088		1000002642	170.049	311.726	-296.706
1000000873	326.893	292.841	-72.7859		1000000200	311.149	-0.662	-1094.91		1000001057	300.55	178.181	927.57		1000002642	169.587	312.11	-296.698
1000000873	326.717	293.303	-72.5167		1000000200	310.866	-0.662	-1094.57		1000001057	300.172	179.105	925.92		1000002642	169.66	311.807	-296.662
1000000873	326.167	291.959	-72.8135		1000000200	311.076	-0.662	-1094.07		1000001057	300.483	181.242	921.824		1000002642	169.924	311.983	-296.581
1000000873	327.368	291.748	-72.7316		1000000200	311.137	-0.662	-1095.46		1000001057	300.058	181.522	924.251		1000002642	169.599	311.615	-296.704
1000000949	193.681	286.689	-86.2835		1000000200	311.321	-0.662	-1095.78		1000001057	299.198	183.509	923.293		1000002642	170.001	311.982	-301.436
1000000949	194.118	288.443	-86.7522		1000000200	311.063	-0.662	-1095.1		1000001057	298.56	185.028	922.617		1000002642	169.544	311.499	-301.601
1000000949	193.552	286.172	-83.2185		1000000200	311.3	-0.662	-1095.33		1000001057	298.945	186.229	918.128		1000002642	170.08	311.735	-301.172
1000000949	193.797	287.269	-83.5823		1000000200	310.641	-0.662	-1094.67		1000001057	299.15	185.696	919.438		1000002642	170.488	311.913	-300.7
1000000949	194.837	287.691	-82.7602		1000000200	310.623	-0.662	-1094.67		1000001057	299.299	185.801	918.938		1000002642	169.731	311.824	-301.438
1000000949	194.637	288.845	-82.1548		1000000200	312.012	-0.662	-1096.32		1000001057	298.838	186.11	918.34		1000002642	169.803	311.961	-300.263
1000000949	196.073	287.446	-84.6086		1000000200	311.419	-0.662	-1098.74		1000001057	299.05	186.243	917.599		1000002642	169.701	311.659	-301.03
1000000949	195.67	288.035	-82.5238		1000000201	276.195	21.8063	-1090.77		1000001057	299.353	186.627	918.06		1000002642	170.032	311.833	-296.655
1000000949	194.938	288.58	-81.8905		1000000201	276.305	21.4151	-1090.78		1000001057	299.202	186.491	917.173		1000002642	169.113	311.309	-296.46
1000000949	194.767	288.168	-85.7157		1000000201	275.841	20.9569	-1090.89		1000001057	297.862	186.574	918.893		1000002642	169.556	311.471	-296.631
1000000949	196.04	287.905	-83.2003		1000000201	275.334	20.8481	-1089.85		1000001057	298.166	186.643	921.038		1000002642	169.157	312.069	-301.59
1000000949	196.683	287.952	-82.5685		1000000201	275.264	21.6222	-1090.88		1000001057	299.301	186.186	919.861		1000002642	169.32	312.026	-296.282
1000000949	196.558	287.873	-81.8837		1000000201	275.061	21.2554	-1091.17		1000001057	298.063	187.635	918.748		1000002642	169.148	311.462	-296.209
1000000949	196.697	288.004	-81.2985		1000000201	274.331	21.4607	-1091.6		1000001057	297.871	186.739	921.26		1000002642	170.058	311.844	-296.516
1000000949	196.475	287.21	-87.4011		1000000201	274.761	21.3732	-1091.37		1000001057	298.107	186.859	922.034		1000002642	169.583	311.653	-296.548
1000000949	197.208	287.075	-86.2366		1000000201	274.009	20.9668	-1091.66		1000001057	298.369	186.697	922.369		1000002642	169.142	311.627	-296.953
1000000949	196.964	287.276	-85.1184		1000000201	273.99	22.0025	-1091.74		1000001057	298.124	186.862	918.254		1000002642	168.947	311.544	-297.037
1000000949	197.357	286.981	-82.8091		1000000201	274.301	21.1232	-1090.77		1000001057	298.55	186.7	918.969		1000002642	169.794	311.569	-297.113
1000000949	197.693	288.035	-83.8363		1000000201	273.599	21.5043	-1091.76		1000001057	299.131	186.285	923.212		1000002642	169.653	312.061	-300.397
1000000949	198.514	287.69	-86.6066		1000000201	273.548	21.4417	-1091.89		1000001057	298.974	185.85	918.978		1000002642	169.806	311.66	-297.861
1000000949	198.66	287.485	-80.9854		1000000201	274.371	21.5162	-1092.51		1000001057	298.47	186.012	923.169		1000002642	169.511	312.297	-297.112
1000000949	199.063	288.333	-81.7971		1000000201	274.416	21.6169	-1093.96		1000001057	299.221	184.223	921.655		1000002642	169.417	312.12	-296.746
1000000949	198.91	287.923	-83.9579		1000000201	273.994	21.5677	-1093.72		1000001057	299.039	182.896	917.23		1000002642	169.805	312.064	-296.761
1000000949	199.218	288.535	-82.4061		1000000201	274.548	21.4402	-1094.49		1000001057	299.733	182.399	916.836		1000002642	169.294	311.921	-296.685
1000000949	199.867	288.052	-82.6602		1000000201	274.99	20.9564	-1094.04		1000001057	300.378	181.74	917.129		1000002642	168.833	312.034	-296.548
1000000949	199.001	288.143	-82.6413		1000000201	274.245	21.6263	-1094.63		1000001057	300.67	180.708	916.85		1000002642	170.23	311.945	-301.512
1000000949	199.584	289.193	-82.8027		1000000201	274.121	21.3275	-1095.62		1000001057	300.391	180.39	921.286		1000002642	169.241	311.749	-301.3
1000000949	198.533	288.01	-85.9608		1000000201	275.046	21.2515	-1095.71		1000001057	300.45	176.85	918.158		1000002642	169.199	311.766	-300.967
1000001074	316.787	134.728	-73.133		1000000201	274.414	20.8827	-1096.04		1000001090	2.18336	133.954	927.396		1000002642	169.774	311.749	-301.01
1000001074	318.014	135.64	-73.1087		1000000201	274.377	21.8582	-1096.69		1000001090	-0.662	134.248	924.719		1000002642	168.816	311.585	-301.059
1000001074	316.703	135.391	-72.7858		1000000201	273.813	21.7984	-1097.91		1000001090	1.28707	135.479	925.973		1000002642	168.854	311.188	-299.716
1000001074	318.388	134.519	-68.4633		1000000201	274.101	21.7752	-1096.19		1000001090	1.56563	135.146	927.457		1000002642	169.196	311.635	-300.154
1000001074	317.518	135.593	-72.9392		1000000201	274.083	22.0568	-1096.16		1000001090	-0.662	135.777	927.729		1000002642	169.574	311.522	-301.276
1000001074	317.835	135.655	-73.1243		1000000201	274.61	21.5272	-1095.45		1000001090	-0.662	134.657	927.664		1000002642	168.938	311.644	-300.622
1000001074	318.043	135.976	-68.226		1000000201	274.144	21.8482	-1096.47		1000001090	-0.662	134.247	927.512		1000002642	168.96	311.596	-300.173
1000001074	318.278	135.593	-68.3137		1000000201	275.896	22.0654	-1096.36		1000001090	1.97551	134.774	927.701		1000002642	169.098	311.681	-300.782
1000001074	318.002	134.824	-70.0878		1000000201	274.809	22.2704	-1097.22		1000001090	2.23493	134.577	927.414		1000002642	168.733	311.313	-300.427
1000001074	318.094	135.53	-68.2402		1000000201	275.084	21.6685	-1097.53		1000001090	2.61809	134.996	927.678		1000002642	169.509	311.607	-300.327
1000001074	317.138	136.657	-68.2985		1000000201	274.696	22.0127	-1094.18		1000001090	2.12372	134.657	926.838		1000002642	169.312	311.372	-299.144
1000001074	318.258	135.547	-68.435		1000000201	274.067	21.5178	-1097.59		1000001090	-0.662	134.83	927.639		1000002642	168.707	311.201	-299.94
1000001074	318.296	135.338	-73.1341		1000000201	274.117	22.0236	-1097.87		1000001090	0.517272	134.816	927.824		1000002642	169.312	311.93	-300.098
1000001074	318.591	134.429	-73.0368		1000000201	274.456	21.9728	-1099.02		1000001090	-0.662	135.147	927.449		1000002642	168.596	311.819	-300.181
1000001074	318.007	134.42	-68.3622		1000000201	274.386	20.9263	-1099.41		1000001090	-0.662	134.875	922.211		1000002642	169.318	311.834	-300.239
1000001074	318.155	134.809	-67.9901		1000000201	274.089	21.4692	-1094.94		1000001090	-0.662	134.626	922.892		1000002642	169.146	311.463	-300.99
1000001074	318.257	134.183	-73.3156		1000000201	274.473	20.7322	-1093.66		1000001090	0.808999	135.333	928.407		1000002642	169.245	311.607	-299.665
1000001074	317.859	134.847	-72.9645		1000000201	274.684	21.1646	-1095.09		1000001090	0.437421	134.617	922.941		1000002642	168.98	311.98	-297.592
1000001074	317.568	135.755	-73.2299		1000000201	274.951	20.898	-1094.21		1000001090	-0.662	135.127	927.845		1000002642	168.956	311.508	-298.19
1000001074	317.561	135.358	-72.6061		1000000201	273.991	20.8045	-1095.6		1000001090	-0.662	134.386	927.651		1000002642	168.85	311.885	-298.942
1000001074	318.363	135.232	-72.9999		1000000201	273.508	20.0412	-1095.28		1000001090	1.84116	134.752	922.487		1000002642	169.123	311.839	-297.308
1000001074	318.059	134.314	-72.8507		1000000201	274.419	20.0992	-1093.83		1000001090	1.17166	134.221	922.96		1000002642	168.755	311.618	-297.278
1000001074	318.342	135.934	-73.1877		1000000201	274.055	19.6529	-1094.19		1000001090	1.84025	135.075	922.283		1000002642	169.173	311.751	-297.143
1000001074	317.301	135.312	-73.0625		1000000201	273.92	19.9243	-1094.21		1000001090	-0.662	134.151	922.667		1000002642	168.474	311.172	-298.444
1000001082	302.456	325.41	-72.4514		1000000201	273.853	20.5672	-1094.59		1000001090	1.50722	135.112	927.64		1000002642	168.941	311.559	-297.518
1000001082	302.196	324.216	-72.3738		1000000201	274.493	20.7725	-1093.35		1000001090	-0.094209	133.058	927.866		1000002642	168.507	311.63	-297.775
1000001082	302.068	323.782	-72.5335		1000000201	274.318	20.0817	-1093.25		1000001108	284.099	257.511	923.034		1000002642	168.63	311.664	-298.688
1000001082	300.647	322.234	-67.5269		1000000201	273.988	21.2325	-1092.32		1000001108	283.608	256.591	922.496		1000002642	168.423	311.07	-295.611
1000001082	299.993	320.74	-72.4827		1000000201	274.688	20.7188	-1094.5		1000001108	283.213	256.393	922.158		1000002642	168.244	311.607	-296.586
1000001082	299.513	318.449	-72.5338		1000000201	274.601	21.1174	-1095.58		1000001108	282.548	255.712	921.264		1000002642	169.66	312.153	-300.998
1000001082	297.347	316.148	-69.6842		1000000201	275.085	21.7909	-1094.52		1000001108	281.83	256.24	920.774		1000002642	168.838	311.793	-297.923
1000001082	296.928	313.456	-68.2069		1000000201	275.719	21.6098	-1094.69		1000001108	282.616	256.114	921.854		1000002642	169.168	311.849	-297.311
1000001082	294.133	309.291	-69.9779		1000000201	276.139	22.1086	-1095.17		1000001108	281.66	256.247	919.17		1000002642	168.98	312.155	-297.243
1000001082	292.447	307.352	-68.7971		1000000201	275.967	22.3608	-1095.31		1000001108	281.805	256.091	922.522		1000002642	169.1	311.751	-297.259
1000001082	289.891	305.026	-67.9084		1000000201	277.254	22.6369	-1099.26		1000001108	281.148	256.946	921.548		1000002642	169.141	311.807	-296.978
1000001082	285.963	303.106	-68.3395		1000000201	277.35	22.2562	-1099.64		1000001108	281.289	257.591	921.984		1000002642	169.843	311.641	-296.862
1000001082	283.772	301.034	-72.824		1000000201	277.129	23.09	-1099.11		1000001108	281.569	257.21	919.839		1000002642	169.568	311.498	-296.655
1000001082	280.364	299.274	-74.3186		1000000201	280.029	23.3709	-1100.25		1000001108	281.553	257.191	921.364		1000002642	169.099	311.831	-296.78
1000001082	278.072	296.939	-71.2664		1000000201	277.958	23.2149	-1097.45		1000001108	281.436	257.264	922.293		1000002642	169.892	312.039	-296.897
1000001082	277.241	295.811	-70.4847		1000000201	280.332	23.1523	-1099.16		1000001108	275.036	258.645	917.666		1000002642	169.496	312.006	-297.273
1000001082	275.869	292.716	-71.1674		1000000201	281.145	22.389	-1099.24		1000001108	273.232	260.031	921.812		1000002642	169.102	311.513	-296.89
1000001082	274.341	290.893	-75.2095		1000000201	281.57	22.3176	-1099.55		1000001108	272.086	259.734	914.3		1000002642	169.321	312.1	-296.856
1000001082	272.722	289.122	-75.6412		1000000201	281.239	23.1657	-1100.02		1000001108	270.732	259.76	918.557		1000002642	169.48	311.887	-297.022
1000001082	271.993	288.412	-75.0661		1000000201	284.023	21.9518	-1099.99		1000001108	270.317	258.844	919.178		1000002642	169.456	312.163	-296.852
1000001082	272.169	288.866	-75.7679		1000000201	283.525	21.426	-1100		1000001108	270.465	258.727	913.17		1000002642	169.413	312.275	-296.828
1000001082	271.066	286.393	-75.0788		1000000201	283.3	21.096	-1100.25		1000001108	269.964	257.001	913.903		1000002642	168.507	311.783	-296.769
1000001082	269.753	286.62	-76.1972		1000000201	283.171	21.7779	-1098.58		1000001108	270.118	257.567	913.271		1000002642	168.844	312.086	-296.66
1000001082	270.012	286.025	-75.9897		1000000201	282.54	22.0309	-1097.04		1000001108	268.584	258.809	912.244		1000002642	169.595	311.965	-296.989
1000001082	269.991	285.955	-75.7432		1000000201	283.477	21.4104	-1098.48		1000001108	269.09	259.128	918.071		1000002642	169.373	311.654	-297.357
1000001082	269.617	285.007	-76.1779		1000000201	283.497	21.706	-1095.86		1000001108	268.777	258.695	917.479		1000002642	168.969	312.417	-297.871
1000001082	268.751	284.275	-76.5045		1000000201	283.992	21.4058	-1096.12		1000001000	116.494	137.495	917.348		1000002642	169.638	311.556	-298.585
1000001082	269.535	285.025	-76.3254		1000000201	283.917	21.2113	-1095.95		1000001000	115.807	137.414	916.645		1000002642	170.006	311.978	-297.25
1000001082	268.426	283.473	-76.2523		1000000201	284.108	21.4179	-1095.04		1000001000	116.014	137.63	917.17		1000002642	168.885	311.833	-297.749
1000001082	268.235	283.366	-77.1901		1000000201	284.557	21.6129	-1096.04		1000001000	116.054	137.646	916.938		1000002642	168.975	311.931	-297
1000001108	11.6512	202.309	-72.8327		1000000201	284.798	20.8388	-1095.03		1000001000	116.097	137.449	915.927		1000002642	169.096	311.527	-296.461
1000001108	14.5758	201.621	-67.673		1000000201	284.954	20.9327	-1094.48		1000001000	116.071	136.737	916.246		1000002642	169.668	311.902	-296.717
1000001108	17.0287	200.8	-68.0151		1000000201	284.11	20.1377	-1091.88		1000001000	115.973	137.144	915.459		1000002642	169.559	311.389	-296.873
1000001108	16.5781	202.153	-67.6599		1000000201	284.584	20.4829	-1094.27		1000001000	115.777	137.841	914.867		1000002642	169.574	311.394	-296.683
1000001108	16.4997	203.722	-67.4925		1000000201	285.421	20.9047	-1093.98		1000001000	116.476	138.021	912.572		1000002642	169.661	311.824	-296.569
1000001108	15.6082	204.572	-67.6872		1000000201	283.526	19.9702	-1091.35		1000001000	116.634	137.817	913.175		1000002642	169.495	312.207	-296.333
1000001108	14.8179	203.815	-67.3784		1000000201	283.436	19.8847	-1090.67		1000001000	116.451	137.653	912.886		1000002642	169.636	312.713	-296.515
1000001108	15.3659	204.323	-72.5551		1000000201	284.451	20.5919	-1094.44		1000001000	116.814	137.849	912.739		1000002642	168.66	312.128	-300.845
1000001108	16.3043	203.85	-72.8389		1000000201	284.032	19.952	-1093.77		1000001000	116.502	137.947	912.395		1000002642	168.949	312.483	-295.975
1000001108	17.2387	204.278	-67.3894		1000000201	283.511	20.7846	-1091.02		1000001000	116.385	138.058	912.572		1000002642	168.332	312.499	-301.211
1000001108	18.3191	204.294	-67.4056		1000000201	283.201	19.7609	-1091.9		1000001000	116.356	137.888	913.229		1000002642	169.357	312.223	-300.786
1000001108	19.0686	203.922	-67.6694		1000000201	283.83	20.1199	-1091.02		1000001000	116.828	137.53	912.633		1000002642	168.906	312.237	-296.048
1000001108	17.456	203.882	-72.7534		1000000201	283.651	19.9784	-1091.4		1000001000	116.671	137.939	913.046		1000002642	169.637	311.565	-300.251
1000001108	15.7476	203.457	-72.8328		1000000201	284.283	20.2854	-1093.55		1000001000	116.962	138.119	912.453		1000002642	170.252	312.85	-295.367
1000001108	16.7249	204.078	-72.7088		1000000201	283.227	20.14	-1092.1		1000001000	116.61	138.076	912.484		1000002642	168.295	311.78	-300.426
1000001108	16.9564	204.151	-72.9532		1000000201	283.192	20.644	-1091.4		1000001000	116.314	138.237	912.772		1000002642	169.851	311.898	-300.268
1000001108	17.6422	204.629	-72.7581		1000000201	283.451	20.1994	-1091.42		1000001000	116.957	138.388	912.291		1000002642	170.074	312.221	-296.035
1000001108	16.9767	204.072	-72.6584		1000000201	282.893	20.3675	-1090.87		1000001000	116.466	138.336	912.517		1000002642	169.412	311.774	-295.905
1000001108	17.8218	204.175	-72.9235		1000000201	283.487	21.1286	-1091.75		1000001000	116.31	138.173	912.076		1000002642	169.714	312.191	-301.12
1000001108	16.705	203.686	-73.3112		1000000201	283.042	21.4386	-1091.54		1000001000	116.26	137.899	911.926		1000002642	170.136	311.666	-298.594
1000003000	181.951	223.799	-63.8918		1000000201	283.786	21.1334	-1093.78		1000001000	116.823	138.016	912.432		1000002642	168.469	311.747	-298.553
1000003000	182.267	224.454	-64.1846		1000000201	282.912	20.6489	-1091.16		1000001000	116.348	138.057	911.783		1000002642	168.79	311.884	-298.455
1000003000	181.377	224.463	-63.5671		1000000201	282.951	21.0657	-1091.32		1000001000	116.686	138.01	911.844		1000002642	168.463	311.699	-297.301
1000003000	181.949	223.592	-63.6536		1000000201	282.731	20.8361	-1090.71		1000001000	116.501	138.181	912.412		1000002642	168.692	311.857	-298.355
1000003000	181.999	224.198	-63.3538		1000000201	282.217	20.5855	-1090.67		1000001000	116.674	138.204	912.214		1000002642	169.017	312.215	-298.892
1000003000	181.839	225.38	-62.975		1000000201	282.099	20.8355	-1091.91		1000001000	116.583	138.222	912.357		1000002642	169.057	311.958	-297.894
1000003000	181.806	224.609	-63.5745		1000000201	282.108	20.6932	-1091.73		1000001000	116.867	138.741	912.417		1000002642	168.915	311.802	-299.118
1000003000	182.047	225.077	-63.6061		1000000201	281.341	20.6658	-1092.03		1000001000	116.683	138.087	912.467		1000002642	169.325	311.796	-300.776
1000003000	181.273	225.805	-62.2785		1000000201	282.629	20.5967	-1092.34		1000001000	116.508	137.664	912.499		1000002642	170.731	312.637	-300.627
[truncated: 5,565 more rows]

## Sheet: 3F
pDC Displacement Rate (μm/min)
[truncated: 280 more rows]

## Sheet: 3G
Individual pDC in contact with CD169+ MPs (Time (min))
[truncated: 265 more rows]
