# Supplementary material for: CD169+ macrophages orchestrate plasmacytoid dendritic cell arrest and retention for optimal priming in the bone marrow of malaria-infected mice
Source: eLife. 2022 Oct 24;11:e78873. doi: 10.7554/eLife.78873 (PMC9648966; doi:10.7554/eLife.78873)
Supplement: Figure 4—source data 1. [file elife-78873-fig4-data1.xlsx]

## Sheet: 4A
Py YM-infected, 36 hrs +PBS WT PTCRA-EGFP					Py YM-infected, 36 hrs + PT WT PTCRA-EGFP
171214 wt f1 ptcragfp 36h movie1_03 for XYZ flower					180313 36h pyym ptx xyz cent v1
Track ID	Rel. Centroid X (µm)	Rel. Centroid Y (µm)	Rel. Centroid Z (µm)		Track ID	Centroid X (µm)	Centroid Y (µm)	Centroid Z (µm)
100	0	0	0		311	130.64	17.88	32.02
100	10.23	170.6	3.25		311	130.95	18.84	29.47
100	0.596	-0.174	-0.317		311	131.1	18.22	30.21
100	-0.199	0.103	0.0119		311	131.53	18	29.56
100	-0.807	-0.255	0.0295		311	130.78	17.38	29.49
100	-0.349	-0.369	0.316		311	131.17	18.05	30.05
100	0.576	0.588	-0.73		311	131.7	17.98	29.36
100	0.196	-0.133	0.242		311	131.02	17.96	32.06
100	-0.21	-0.203	0.266		311	130.47	18.43	29.91
100	0.0199	0.0916	-0.123		311	131.06	16.86	30.13
100	1.24	0.185	1.28		311	130.75	17.66	28.06
100	0.371	0.201	0.273		311	131.29	17.97	27.69
100	-0.534	-0.487	-0.803		311	131.28	17.8	29.13
100	0.074	-0.141	0.112		311	130.08	17.9	30
100	0.247	-0.0893	1.16		311	130.65	18.23	28.59
100	1.69	0.473	1.88		311	129.55	18.61	28.12
100	0.99	0.171	1.06		311	130.38	17.17	25.87
100	-0.987	-0.759	-1.48		311	130.19	18.09	29.2
100	1.11	0.592	1.27		311	130.76	17.41	28.86
100	0.423	-0.119	0.545		311	130.63	17.24	27.94
100	1.56	0.217	2.3		311	129.62	17.68	27.64
100	-0.701	-0.172	-0.483		311	130.98	17.61	27.99
100	-0.724	-0.905	-1.44		311	130.55	18.13	26.65
100	1.06	1.21	1.98		311	130.56	17.46	27.98
100	-0.249	0.0336	0.127		311	130.73	16.22	27.95
100	0.371	0.512	0.229		311	130.85	17.18	26.87
100	0.435	0.905	0.655		311	129.98	17.83	28.13
100	0.854	0.952	1.46		311	130.6	17.21	27.85
100	-0.0612	-0.506	-0.78		311	130.5	16.8	28.1
100	0.224	0.81	0.548		311	129.5	18.22	25.48
100	0.815	1.02	1.03		311	130.68	16.41	26.49
100	-0.786	-0.281	-1.16		311	130.22	16.95	26.26
100	0.0745	0.2	0.911		311	130.73	16.51	26.72
100	0.0683	-0.231	0.0367		311	129.58	16.89	26.25
100	-0.102	0.0405	0.279		311	129.68	16.81	25.46
100	0.596	0.531	0.372		311	130.02	16.19	26.43
100	-0.0741	-0.779	0.123		311	130.29	17.04	27.61
100	-0.0937	-0.277	-0.373		311	130.04	16.75	24.51
100	0.0141	-0.189	0.752		311	129.92	16.33	25.55
100	-0.0451	0.172	-0.628		311	129.38	16.56	26.9
100	-0.914	-0.666	-1.81		311	129.24	16.8	27.28
100	0.268	0.0684	0.82		311	129.73	16.7	26.03
100	-0.217	-0.32	-0.0111		311	129.31	18.62	26.3
100	0.477	0.589	0.251		311	129.06	16.89	27.58
100	0.622	0.36	1.16		311	129.62	17.09	26.99
100	-0.128	0.0307	-0.226		311	129.53	16.92	26.63
100	0.148	-0.247	-0.339		311	129.9	16.18	25.9
100	0.395	0.511	1.5		311	129.98	16.96	25.24
100	-0.381	0.175	-0.171		311	129.93	16.84	25.93
100	-0.0745	-0.502	-0.867		311	130.05	17.4	25.69
100	-0.348	-0.149	-0.743		311	129.8	17.68	27.08
100	-0.597	-0.461	-0.519		311	130.71	17.21	26.85
100	0.318	0.238	-0.548		311	129.75	16.96	25.33
100	0.042	0.0503	0.735		311	129.99	16.71	25.02
100	0.0719	0.427	0.0354		311	129.31	17.6	27.48
100	-0.376	-0.46	-1.37		311	128.94	17.27	27.73
100	0.155	-0.15	0.117		311	129.67	17.22	26.9
100	0.0711	0.317	0.0142		311	129.99	16.7	26.24
100	0.462	0.258	0.717		311	129.34	17.35	25.67
100	0.446	0.288	1.56		311	129.22	17.93	28.12
100	-0.271	-0.258	0.0749		311	129.53	17.31	27.56
100	-0.208	0.0639	-0.869		311	129.15	16.54	26.94
100	0.957	0.596	0.468		311	129.94	16.25	25.95
100	-0.812	-0.648	-1.74		311	129.2	16.76	27.09
100	-0.746	-0.0683	0.00112		311	129.38	16.8	28.51
100	-0.0949	-0.0191	-0.102		311	129.46	17.11	26.59
100	1.67	1.53	1.86		311	129.41	16.82	26.19
100	-0.31	-0.831	0.149		311	128.91	17.54	25.65
100	-0.407	-0.212	-1.25		311	130.13	16.97	27.76
100	0.448	-0.137	0.654		311	129.47	17.53	27.47
100	-0.0643	-0.301	-0.339		311	129.48	17.46	27.46
100	-0.196	-0.0272	-0.113		311	128.91	17.77	25.48
100	-0.175	0.177	0.64		311	129.27	16.71	25.64
100	0.219	-0.0865	-0.0752		311	130.11	16.48	25.07
100	-0.0926	0.0482	-0.636		311	129.49	16.87	25.22
100	-0.122	0.0282	0.956		311	129.34	16.81	23.91
100	-0.199	-0.11	-1.11		311	129.14	16.23	24.68
100	-0.677	-0.764	-0.732		311	129.21	16.88	24.97
100	-0.383	-0.472	-0.808		311	129.08	16.93	23.7
100	0.22	0.15	-0.00908		311	129.16	16.05	24.08
100	-0.285	-0.447	-0.697		311	129.95	16.88	23.02
100	2.01	1.58	2.87		311	128.99	16.13	24.53
100	-0.235	0.175	-0.916		311	129.48	16.44	23.37
100	0.0997	0.163	0.999		311	129.05	15.89	23.82
100	0.0358	0.0428	-0.366		311	129.09	15.3	23.14
100	0.145	-0.164	-0.108		311	129.2	16.14	22.82
100	0.0835	-0.0234	-0.186		311	128.78	16.51	24
100	0.415	0.344	-0.0739		311	128.53	16.1	22.74
100	0.0834	-0.0177	0.963		311	129.08	16.16	22.26
100	0.501	0.378	-0.00175		311	128.74	15.86	25.15
100	0.428	0.444	0.263		311	128.66	15.53	23.74
100	-0.896	-0.847	-0.999		311	128.28	16.4	23.27
100	1.55	1.36	1.58		311	128.77	16.74	23.03
100	0.368	0.0904	0.951		311	128.47	16.13	22.03
100	0.186	-0.0321	0.253		311	128.83	15.71	21.94
100	0.154	0.391	-0.931		311	128.94	15.5	21.6
100	-0.533	-0.122	0.252		311	128.62	15.76	21.11
200	0	0	0		311	129.55	15.29	21.19
200	230.4	128.4	15.34		311	128.14	17.5	20.86
200	1.1	1.09	-0.395		311	128.45	15.55	21.74
200	-0.596	-0.864	-0.486		311	128.68	15.87	20.28
200	0.0664	0.407	0.0517		311	128.72	15.59	19.49
200	0.286	0.187	1.34		311	128.1	15.86	19.94
200	-0.481	-0.228	-1.41		311	128.47	15.99	17.32
200	-0.278	-0.196	0.801		311	129.28	14.78	20.74
200	0.303	0.206	-0.236		311	128.15	15.05	19.53
200	0.644	0.447	-0.565		311	128.62	14.96	19.14
200	-0.891	-0.377	-0.188		311	128.71	16.21	20.93
200	-0.555	-0.289	0.993		311	127.98	15.29	20.54
200	-0.466	0.171	-1.13		311	128.13	15.26	16.51
200	0.662	-0.0974	0.629		311	128.43	16.04	15.56
200	-0.539	0.279	0.0952		311	127.91	14.51	21.55
200	-0.261	-0.00999	-0.71		311	127.97	15.3	18.17
200	1.42	-0.101	0.842		311	127.81	15.29	17.39
200	0.0907	-0.413	1.24		311	127.75	15.21	16.12
200	0.69	-0.291	-0.232		311	127.9	15.43	16.87
200	-0.709	0.263	-0.92		311	127.71	15.74	16.53
200	0.794	-0.378	1.19		311	127.54	15.13	17.08
200	0.206	-0.0777	-0.311		311	127.88	14.81	15.54
200	-0.771	0.531	-0.185		311	127.36	14.93	17.46
200	-0.721	0.0322	-0.147		311	128.08	15.03	15.17
200	0.671	-0.403	-0.438		311	127.25	16.1	16.26
200	0.222	0.096	1.68		311	127.76	16.07	15.64
200	0.313	-0.0974	-0.0168		311	127.5	15.39	13.77
200	-0.243	-0.0731	-0.68		311	127.2	14.94	11.96
200	0.0753	0.132	0.207		311	127.75	14.98	14.09
200	-0.0906	-0.0382	-0.371		311	127.44	15.2	13.07
200	0.424	-0.144	-0.354		311	127.64	15.22	12.34
200	-0.0127	0.237	0.671		311	127.7	15.27	15.03
200	-0.678	-0.0247	-0.0995		311	127.48	14.87	14.3
200	-0.447	-0.0483	-0.037		311	127.29	14.59	12.74
200	-0.926	0.221	-1.9		311	127.55	15.31	12.14
200	-0.174	0.0634	-0.0297		311	127.5	15.2	11.07
200	1.34	-0.154	1.87		311	127.47	14.24	11.21
200	-0.258	0.357	-1.47		311	127.39	15.39	12.61
200	0.242	-0.324	0.874		311	127.31	14.39	11.66
200	-0.611	0.209	-1.34		311	128.07	15.36	12.37
200	-0.374	0.00704	0.356		311	127.25	14.89	10.31
200	0.59	-0.19	0.387		311	127.03	14.23	9.13
200	-0.772	0.171	-0.96		311	127.26	14.77	8.7
200	0.957	-0.37	1.73		311	126.96	14.6	8.97
200	0.157	0.391	-0.868		311	127.24	14.63	6.99
200	1.06	-0.193	2.66		311	126.84	14.44	7.57
200	0.662	-0.445	-1.49		311	126.86	14.79	9.37
200	0.135	0.0138	1.93		311	126.8	15.12	8.62
200	-0.569	0.193	-1.15		311	125.51	15.08	11.24
200	0.475	-0.243	0.599		311	126.69	14.27	7.13
200	-0.331	0.0343	-0.96		311	126.5	14.65	6.94
200	0.539	0.0983	0.271		311	126.68	14.4	9.08
200	-0.258	0.454	-0.275		311	126.59	14.16	8.16
200	-0.174	-0.238	-0.553		311	126.47	14.33	6.6
200	0.544	-0.185	-0.844		311	125.94	14.2	6.54
200	-0.101	0.128	0.321		311	126.05	15.37	6.18
200	0.459	0.13	-0.268		311	125.4	13.81	6.59
200	0.0346	0.189	1.29		311	125.07	14.21	5.76
200	-0.509	-0.461	0.313		385	152.4	58.37	27.12
200	-0.527	0.168	-1.56		385	155.02	58.18	27.76
200	0.69	-0.0877	1.42		385	156.22	58.42	28.62
200	0.474	-0.492	-0.251		385	155.74	58.43	28.31
200	-0.162	-0.0367	-0.638		385	156.49	58.41	27.02
200	-0.214	0.39	0.0981		385	156.02	58.37	26.02
200	-0.104	-0.666	0.339		385	155.75	58.28	27.16
200	-0.351	0.431	-0.096		385	155.95	58.15	25.73
200	0.491	0.109	-0.333		385	155.31	58.06	24.61
200	1.41	-0.186	1.98		385	155.85	57.67	25.22
200	-0.346	-0.148	-0.629		385	156.15	57.88	24.82
200	0.347	0.131	-0.416		385	154.36	58.31	25.33
200	-0.0122	-0.141	0.168		385	156.05	58.23	26.07
200	-0.541	0.0568	-0.638		385	157.91	57.61	24.95
200	0.4	0.124	-0.257		385	156.06	57.71	25.33
200	-0.0103	0.33	-0.774		385	155.08	57.81	25.49
200	0.235	0.177	0.569		385	156	57.62	24.63
200	0.215	0.0666	0.338		385	156.17	57.61	24.47
200	-0.0621	0.523	-1.04		385	155.48	57.78	24.62
200	0.4	0.193	1.78		385	155.66	57.93	24.42
200	0.413	-0.451	-0.877		385	156.05	57.17	23.64
200	0.202	-0.52	-0.0785		385	155.24	57.57	23.15
200	-0.487	0.0331	-0.834		385	155.06	57.65	25.44
200	0.849	-0.508	0.785		385	155.61	57.73	23.96
200	-0.332	-0.267	-0.155		385	155.41	57.62	22.08
200	-0.876	0.217	-1.3		385	155.85	57.51	23.23
200	0.0558	0.166	-0.00546		385	155.72	57.64	22.58
200	-0.617	-0.838	-0.941		385	154.94	57.71	22.15
200	0.721	-0.607	-0.18		385	155.01	57.63	20.76
200	0.726	-0.103	0.571		385	155.03	56.9	20.74
200	-0.203	0.0255	-1.44		385	154.87	57.44	23.43
200	-0.0135	0.293	0.744		385	154.85	57.22	21.04
200	0.322	-0.368	-0.528		385	155.31	57.48	17.83
200	-0.277	-0.343	0.347		385	154.64	57.64	21.08
200	0.182	-0.133	1.25		385	154.82	57.11	22.06
200	-0.143	0.138	-1.17		385	155.44	56.75	19.83
200	0.376	-0.226	-1.15		385	154.88	56.92	18.68
300	0	0	0		385	155.38	56.8	19.23
300	186.24	95.24	19.35		385	155.55	57.04	19.37
300	-0.354	-0.203	0.0807		385	154.46	57.71	18.72
300	0.275	1.1	0.259		385	154.34	57.12	19.45
300	0.214	-0.269	-0.826		385	155.41	57.42	17.44
300	-0.0144	-0.5	0.41		385	154.75	56.99	17.42
300	0.0332	0.438	-1.06		385	155.06	57.03	16.23
300	-0.0524	-0.811	0.654		385	154.96	56.47	18.33
300	-0.108	0.309	0.0703		385	155.03	56.79	18.9
300	0.249	0.393	0.34		385	155.11	56.9	18.01
300	0.0308	-0.366	0.741		385	154.66	57.22	17.44
300	0.023	0.557	-0.133		385	154.84	57.52	14.56
300	0.0665	-1.01	-0.378		385	156.16	57.01	15.68
300	0.617	0.667	-0.429		385	154.38	57.09	15.68
300	-0.88	0.243	0.835		385	156.24	56.4	14.57
300	0.421	-0.514	0.329		385	154.93	56.73	15.01
300	-0.159	0.0281	-1.76		385	154.93	56.6	13.92
300	-0.314	0.146	1.07		385	157.39	56.56	15.38
300	0.318	-0.168	0.395		385	154.12	57.12	14.04
300	-0.127	-0.157	0.449		385	154.85	56.66	13.22
300	0.127	-0.041	-0.53		385	154.3	56.84	14.24
300	0.2	0.715	-0.00568		385	154.01	56.34	12.38
300	-0.218	-0.247	0.381		385	154.25	56.56	11.1
300	0.487	-0.13	0.391		385	153.87	56.92	11.35
300	-0.269	0.146	-0.576		385	155.4	56.91	10.38
300	0.298	-0.107	-0.213		385	155.45	56.61	11.85
300	0.0227	0.155	0.357		385	153.97	56.54	9.8
300	-0.454	-0.192	0.0458		385	153.73	56.53	10.25
300	0.515	-0.245	-0.549		385	154.28	56.19	9.53
300	-0.471	0.112	0.584		385	153.46	56.32	9.4
300	-0.0795	0.217	-0.253		385	153.58	56.34	9.78
300	-0.0601	-0.299	-1.02		385	154.8	56.45	10.85
300	0.194	-0.183	1.05		385	154.24	56.59	8.46
300	0.257	0.417	-0.318		385	153.42	56.47	7.9
300	-0.0536	0.142	0.262		385	155.57	55.4	9.54
300	-0.196	-0.222	-0.000539		385	153.68	56.05	7.04
300	0.0869	0.0127	0.79		394	226.66	81.51	33.68
300	0.193	-0.282	-0.307		394	223.49	79.84	28.94
300	0.0465	0.423	-0.783		394	216.17	82.78	29.46
300	-0.0083	0.117	0.817		394	216.6	85.81	29.86
300	-0.432	-0.115	0.195		394	213.28	89.87	33.15
300	0.099	-0.0729	-1.4		394	211.03	93.13	33.24
300	0.0395	-0.375	-0.122		394	213.33	86.09	32.23
300	-0.206	0.572	0.89		394	217.1	89.01	31.52
300	0.319	0.108	0.464		402	243.27	77.48	17.47
300	-0.389	-0.062	-1.35		402	238.37	78.78	18.13
300	0.37	-0.427	0.563		402	239.71	73.59	22.62
300	0.417	0.274	0.439		402	242.66	70.01	21.1
300	-0.207	0.00146	0.204		402	243.45	75.21	17.35
300	0.0482	-0.243	0.114		402	240.17	80.44	15.48
300	-0.116	0.387	0.273		402	243.21	78.87	22.02
300	-0.0852	-0.123	-1.77		408	237.17	92.56	30.78
300	-0.213	-0.0701	0.604		408	239.82	93.74	28.54
300	0.493	-0.0826	0.342		408	246.17	92.28	30.34
300	0.141	0.255	-0.126		408	247.5	87.39	26.89
300	-0.364	0.00593	-0.558		408	249.38	91.17	27.68
300	-0.0138	-0.0983	0.104		413	196.88	79.54	17.69
300	0.209	-0.138	-0.137		413	202.3	74.71	17.44
300	-0.205	0.0791	-0.61		413	205.83	72.46	16.12
300	0.181	-0.106	1.58		413	212.62	72.29	16.68
300	-0.371	0.208	0.285		418	235.13	81.37	12.65
300	0.395	-0.456	-1.74		418	239	85.09	17.65
300	-0.0125	0.102	-0.156		418	236.16	85	21.05
300	-0.109	0.317	-0.264		418	234.32	86.85	27.5
300	0.329	0.134	0.0202		423	204.34	78.25	27.46
300	-0.395	-0.752	0.315		423	208.83	82.49	26.56
300	0.531	-0.00278	-0.922		423	207.71	83.09	21.99
300	-0.122	0.0319	1.31		423	209.16	79.47	16.89
300	-0.217	0.279	-0.17		428	214.38	82.99	20.38
300	0.0178	-0.153	-0.393		428	214.92	82.89	26.63
300	0.456	0.265	1.31		428	217.33	78	31.29
300	-0.451	0.358	-0.936		428	214.18	79.23	31.21
300	0.152	-0.749	-0.261		432	204.83	65.93	18.88
300	-0.373	-0.0279	-0.144		432	205.14	63.84	16.75
300	0.365	0.352	-0.678		432	204.1	59.49	19.65
300	0.103	-0.0481	1.7		436	227.13	80.74	32.13
300	-0.0434	-0.371	-1.66		436	226.22	76.32	30.5
300	-0.335	0.289	0.684		436	222.79	78.4	25.56
300	-0.0584	0.116	0.369		440	230.07	100.79	25.59
300	0.188	0.0459	-0.695		440	228.37	93.58	26.81
300	0.157	-0.573	0.382		440	228.59	86.3	28.06
300	0.19	0.018	-1.78		444	228.55	104.9	32.03
300	-0.364	0.529	1.07		444	226.32	100.69	26.18
300	-0.279	-0.0243	-0.338		444	228.9	104.84	26.72
300	0.456	-0.0316	0.61		448	233.77	53.47	32.47
300	-0.261	-0.0364	-0.579		448	232.52	53.09	35.86
300	-0.0616	0.318	-1.62		448	230.77	59.82	36.9
300	-0.02	-0.511	0.959		452	250.78	52.1	32.43
300	-0.0947	0.22	-0.588		452	249.18	50.79	36.93
300	-0.0859	-0.37	0.771		452	250.23	47.1	35.81
300	0.0695	0.796	-0.753		455	200.64	68.96	20.11
300	-0.294	0.039	-1.09		455	197.26	71.09	24.31
300	0.491	-0.953	3.63		458	211.94	74.86	27.31
300	-0.435	0.139	-2.19		458	213.35	72.18	33.95
300	0.718	0.457	-0.859		461	246.05	52.62	19.11
300	-0.487	-0.238	-0.0354		461	251.91	50.72	16.63
300	0.155	0.0794	-0.891		464	198.49	76.45	27.38
300	-0.861	0.127	-0.397		464	197.58	78.77	26.11
300	0.435	-0.267	0.554		467	230.06	49.01	26.64
400	0	0	0		467	227.99	49.82	29.63
400	13.68	203.9	24.39		470	184.89	74.27	29.44
400	1.04	-0.0153	0.57		470	189.36	78.25	26.21
400	0.461	0.0729	0.292		473	205.64	81.59	32.28
400	0.407	0.0329	0.358		473	203.78	84.28	34.23
400	0.881	0.105	-0.0842		476	199.12	66.49	35.97
400	0.943	-0.162	-0.0435		476	203.13	64.34	31.08
400	0.3	-0.0333	0.791		479	233.1	86.96	31.64
400	0.683	0.247	-0.201		479	233.49	91.87	33.72
400	-0.37	0.0399	0.245		482	228.12	117.24	29.2
400	-0.102	0.216	-0.891		482	223.66	118.33	24.81
400	-0.185	0.598	-0.591		485	7.2	3.58	22.77
400	-0.106	-0.191	0.677		485	6.34	8.52	19.77
400	0.669	-0.313	0.542		489	206.85	41.61	34.63
400	1.43	-0.578	1.98		489	211.69	42.12	31.11
400	0.606	0.336	-0.258		489	214.25	39.07	30.27
400	2.9	0.687	0.648		496	222.31	71.73	24.42
400	-0.568	-0.704	-0.563		496	227.74	70.86	27.17
400	3.02	-0.26	1.57		496	227.39	64.85	24.31
400	1.28	-0.524	0.939		496	228.41	65.89	21.57
400	0.88	-0.194	0.798		496	235.65	67.34	20.4
400	3.18	-0.656	0.0448		496	239.26	71.37	22.71
400	-0.355	0.79	-1.77		499	241.74	51.68	34.82
400	1.73	-0.341	0.91		499	244.19	50.62	29.93
400	-0.632	-0.0408	0.00146		505	232.62	58.23	29.19
400	-0.312	0.203	1.5		505	237.56	62.67	28.46
400	-0.253	0.0691	-0.692		505	241.27	65.2	32.65
400	0.812	-0.258	0.121		505	235.98	70.6	32.62
400	0.523	0.293	-1.78		505	230.78	70.69	31.32
400	0.529	0.731	-0.232		508	170.89	76.39	35.43
400	1.33	-0.576	-0.0385		508	172.55	74.65	30.62
400	0.0484	-0.8	1.99		511	250.66	112.14	35.41
400	0.839	-0.565	-0.452		511	248.1	105.91	33.93
400	0.801	-0.574	1.2		517	247.69	62	22.84
400	0.105	0.268	-0.75		517	243.46	65.69	27.01
400	1.09	-0.1	-0.0779		517	246.37	67.54	24.01
400	0.399	-0.213	0.03		517	247.91	71.37	29.51
400	0.656	-0.499	0.771		517	251.03	69.5	30.2
400	0.196	0.0211	-0.538		521	249.14	71.7	31.5
400	1.36	-0.53	-0.221		521	249.32	76.27	32
400	-0.6	-0.0471	0.6		521	250.45	77.25	30.88
400	0.19	0.0814	0.0104		524	236.72	59.73	17
400	0.875	-0.716	0.135		524	239.6	55.94	22.3
400	-0.176	-0.103	0.303		527	20.91	2.23	21.17
400	-0.225	0.174	0.182		527	21.55	4.81	27.19
400	0.918	0.156	-0.476		530	189.82	63.6	32.38
400	1.5	-0.283	-0.624		530	194.96	59.55	35.55
400	1.57	-0.92	0.707		537	215.84	53.35	26.36
400	0.513	-0.502	0.748		537	212.68	58.72	31.25
400	1.01	-0.339	-0.588		537	217.47	53.36	33.31
400	1.39	-0.663	-0.105		537	211.23	54.3	35.34
400	-0.0225	0.0194	0.239		537	207.36	59.77	32.33
400	1.27	-0.811	1.11		537	207.67	63.54	38.85
400	0.124	-0.123	-0.113		546	235.61	70.41	38.75
400	-0.171	-0.265	0.0453		546	239.36	70.21	33.3
400	0.548	-0.247	0.656		546	237.48	72.62	32.03
400	-0.614	0.0451	0.289		546	235.97	71.09	30.27
400	1.53	-0.553	0.763		546	235.9	76.49	29.75
400	-0.856	0.0317	0.367		546	237.85	74.16	26.98
400	-0.0265	-0.151	-0.243		546	238.33	75.45	34.68
400	-0.17	-0.0663	0.179		546	241.66	74.78	37.61
400	0.904	-0.386	0.159		554	231.27	73.29	27.52
400	0.079	-0.0148	-0.044		554	232.85	73.25	24.4
400	1.09	-0.424	0.373		554	227.59	75.96	27.06
400	0.519	-0.286	0.419		554	222.74	78.66	28.57
400	-0.16	-0.344	1.1		554	222.81	85.37	24.25
400	0.34	-0.5	0.414		554	224.88	88.47	29.19
400	1	-0.0496	-0.217		554	220.21	83.72	31.35
400	-0.862	0.354	0.116		558	211.4	70.68	18.76
400	-0.688	0.277	-0.288		558	210.62	63.35	20.28
400	0.162	-0.0901	-1.24		558	215.19	69.25	22.87
400	0.852	-0.657	0.382		561	221.89	82.98	32.15
400	0.376	-0.172	1.18		561	223.25	85.41	39.25
400	-0.265	0.0403	-1.18		564	190.14	72.42	21.38
400	0.842	-0.454	-0.199		564	186	76.53	17.54
400	0.937	-0.247	0.674		568	219.3	94.74	27.39
400	1.1	-0.115	1.27		568	223.57	94.72	21.71
400	0.845	-0.673	-0.608		568	221.41	97.83	18.31
400	1.11	-0.466	0.369		571	231.98	74.57	24.75
400	0.599	0.0399	-0.518		571	228.64	74.74	22.07
400	-0.393	0.0975	0.105		574	228.65	87.58	17.5
400	-0.614	-0.056	0.129		574	232.28	92.58	19.18
400	-0.496	0.0715	0.0737		577	226.52	74.03	17.88
400	1.04	-0.156	-0.129		577	226.71	76.99	17.8
400	0.516	-0.172	0.5		581	246.6	95.54	34
400	-0.094	0.16	-0.444		581	242.21	90.73	37.97
400	0.1	-0.176	0.196		581	242.29	89.76	34.03
400	0.109	0.456	-1.81		585	238.85	82.96	31.29
400	0.247	-0.0634	-0.238		585	236.15	79.05	30.45
400	-0.3	0.0673	-0.131		585	242.48	81.53	29.07
400	0.528	-0.356	0.477		588	198.71	95.05	26.28
400	0.625	-0.159	0.333		588	193.65	90.81	28.2
400	1.27	-0.164	0.187		591	205.36	100.69	29.76
400	-0.117	-0.0576	0.748		591	209.52	96.84	33.65
400	-0.159	-0.0148	-0.359		596	207.32	54.94	28.2
400	0.0708	0.12	-0.393		596	209.21	51.34	30
500	0	0	0		596	203.98	52.64	26.06
500	102.62	185.87	23.03		596	202.69	52.31	21.07
500	0.0392	0.117	-0.336		600	185.42	86.11	27.54
500	0.0606	0.0572	0.00803		600	189.03	79.86	28.63
500	0.129	-0.698	-1.91		600	194.17	81.65	32.96
500	0.332	-0.0865	0.19		603	206.53	87.38	31.02
500	0.0287	-0.283	0.106		603	207.61	91.4	31.55
500	-0.383	0.221	0.422		608	71.34	45.35	6.34
500	0.238	-0.00867	-1.23		608	72.31	45.83	7.47
500	0.411	-0.448	0.536		608	72.17	45.7	7.45
500	0.161	-0.189	-0.591		608	71.57	45.2	5.89
500	0.235	-0.212	-0.101		611	222.61	71.61	31.67
500	0.0847	-0.0234	0.395		611	226.8	70.14	32.04
500	0.0179	0.2	0.242		614	200.5	84.07	28.47
500	0.159	0.0278	-0.358		614	203.23	85.26	34.24
500	-0.142	0.116	-0.441		617	11.47	14.21	17.47
500	0.144	0.286	0.194		617	8.86	11.49	18.94
500	-0.0795	-0.114	0.324		620	241.65	54.27	18.04
500	0.0266	0.00866	-0.0197		620	246.33	54.35	22.11
500	0.15	0.159	-0.965		627	225.17	65.54	28.47
500	0.0139	0.0768	1.49		627	227.76	61.26	28.95
500	0.133	-0.0106	-0.91		627	223.02	57.46	30.36
500	0.0062	-0.0617	0.824		627	224.96	56.88	26.94
500	0.34	-0.203	0.00519		627	229.48	55.57	22.31
500	0.371	0.0677	-0.357		627	228.39	56.61	18.61
500	-0.00455	0.00752	0.207		631	211.18	75.26	29.86
500	0.169	-0.401	0.196		631	209.62	74.39	33.36
500	0.0495	0.0866	0.0344		631	214.7	77.7	32.89
500	0.287	0.0797	-0.581		634	196.88	99.66	32.77
500	-0.19	0.528	0.433		634	199.38	101.02	35.26
500	0.0947	0.432	-0.0494		637	249.69	64.65	29.09
500	0.164	0.0159	0.182		637	248.59	59.67	25.83
500	-0.0946	0.0489	-0.317		640	198.66	60.43	27.67
500	-0.0608	0.0315	-0.354		640	201.56	63.97	26.2
500	0.0867	0.236	0.0809		643	203.1	66.75	36.17
500	-0.144	-0.00516	-0.129		643	206.24	67.06	35.05
500	0.274	-0.00987	0.0639		646	28.78	6.22	34.35
500	-0.095	-0.121	0.534		646	30.38	5.52	35.73
500	-0.551	0.121	-0.0174		650	239.23	55.65	22.09
500	1.18	-0.0599	-0.252		650	234.09	54.73	20.98
500	0.538	-0.0187	-0.517		650	235.81	54.75	27.61
500	-0.0526	0.0904	-0.12		655	232.73	62.52	23.54
500	0.347	0.129	0.0813		655	231.41	55.15	23.07
500	0.407	0.116	-0.411		655	229.9	55.15	18.31
500	0.953	-0.0499	-0.0237		655	226.56	56.53	13.85
500	0.0657	0.0589	0.214		658	216.92	64.07	30.21
500	0.0434	0.00749	-0.188		658	217.32	71.63	30.96
500	0.29	-0.0592	0.576		661	175.22	90.13	32.72
500	0.258	-0.0139	-0.312		661	176.72	86.47	31.33
500	0.351	-0.0576	0.516		665	201.82	76.72	34.37
500	0.269	0.00425	-0.866		665	200.29	76.23	30.08
500	0.266	-0.0845	0.28		665	199	68.35	30.19
500	0.183	-0.121	0.309		669	225.73	75.22	32.48
500	0.000106	0.12	0.0377		669	229.44	81.2	35.44
500	-0.0512	0.343	-0.777		669	230.93	78.23	35
500	0.0972	0.107	-0.372		673	232.72	106.41	36.8
500	-0.146	-0.179	-0.227		673	228.67	111.21	33.33
500	0.239	-0.05	-0.111		673	227.59	106.37	37.38
500	0.189	-0.0259	0.362		683	216.85	76.77	30.25
500	0.658	0.0566	0.191		683	212.23	76.01	34.59
500	0.128	-0.128	0.291		683	215.23	75.19	29.77
500	0.13	0.423	-1.41		683	210.4	73.41	32.37
500	0.155	0.278	-0.742		683	215.56	68.83	34.76
500	0.278	0.287	-0.655		683	213.86	65.41	32.96
500	0.513	-0.00969	0.0453		683	216.85	68.89	32.33
500	0.426	0.0362	-0.851		683	214.62	68.03	27.92
500	0.17	-0.104	0.384		683	215.97	68.97	28.71
500	0.215	0.0785	0.23		834	154.55	191	21.47
500	0.551	0.28	-0.156		834	154.44	190.86	21.1
500	-0.387	-0.201	-0.257		834	154.23	190.89	20.54
500	0.434	-0.196	0.0858		834	154.23	190.59	21.13
500	0.0726	0.208	-0.527		834	154.36	190.83	21.01
500	0.268	0.164	-0.694		834	154.42	191.15	20.93
500	0.193	0.0642	0.565		834	154.4	191.09	20.95
500	0.399	0.237	-1.13		834	154.35	191	21.01
500	0.0668	-0.239	1.76		834	154.05	190.95	20.02
500	-0.278	-0.245	-1.1		834	154.08	190.84	19.83
500	0.162	0.0789	-0.274		834	154.02	190.6	19.36
500	0.553	0.26	-0.274		834	154.04	190.71	19.54
500	0.272	-0.158	0.682		834	154.27	190.65	20.49
500	0.264	-0.256	-0.283		834	154.16	190.8	20.06
500	0.261	0.0694	-0.416		834	154.1	190.72	19.63
500	0.0977	-0.253	-0.529		834	154.07	190.66	19.42
500	0.537	0.591	-0.0176		834	153.84	190.5	19.2
500	0.00377	0.21	0.185		834	153.87	190.36	18.5
500	0.225	0.207	-0.0476		834	153.95	190.28	19.21
500	0.443	0.564	0.532		834	153.84	190.69	18.51
500	0.265	0.151	-1.03		834	154.08	190.99	18.97
500	0.395	0.597	0.486		834	153.77	190.58	18.71
500	1.62	0.311	0.0476		834	153.88	190.54	18.74
500	0.699	0.719	0.41		834	153.78	190.48	17.68
500	0.327	0.655	-0.0511		834	153.87	190.34	17.95
500	-0.572	-0.312	-0.509		834	153.76	190.41	17.82
500	-0.0477	0.237	0.455		834	153.29	190.7	16.69
500	-0.271	0.688	-0.54		834	153.7	190.86	18.19
500	-0.633	0.681	-0.0487		834	153.54	190.7	18.36
500	-0.162	0.4	-0.0324		834	153.52	190.57	17.81
500	0.103	-0.58	0.034		834	153.5	190.07	17.4
500	0.299	-0.0393	-0.389		834	153.59	190.26	17.12
600	0	0	0		834	153.44	190.3	17.46
600	78.56	22.8	31.94		834	153.41	190.33	17.65
600	-0.839	0.608	0.299		834	153.4	190.44	18.33
600	-0.17	-0.24	-0.0875		834	153.48	190.48	17.52
600	1.29	-0.741	1.22		834	153.39	190.44	17.4
600	1.92	-0.875	-1.27		834	153.45	190.56	17.32
600	-0.349	0.0285	0.528		834	153.4	190.29	17.09
600	0.465	-0.153	-0.35		834	153.54	190.25	17.79
600	-0.0106	-0.171	-0.0505		834	153.53	190.53	18.09
600	0.33	-0.109	0.933		834	153.11	190.54	17.09
600	0.0786	0.264	-0.794		834	153.47	190.62	17.74
600	0.0934	0.0444	0.095		834	153.57	190.77	17.96
600	-0.203	-0.154	0.66		834	153.33	190.42	17.62
600	0.134	0.453	0.268		834	153.48	190.34	17.86
600	-0.0247	-0.295	-0.298		834	153.28	190.5	17.45
600	-0.0811	-0.116	-0.971		834	153.52	190.31	17.76
600	-0.289	0.296	0.464		834	153.65	190.52	18.3
600	0.146	-0.214	-0.343		834	153.47	190.55	16.7
600	0.00359	0.357	-0.195		834	153.5	190.55	18.26
600	0.288	-0.28	0.31		834	153.54	190.58	18
600	0.0285	-0.113	0.651		834	153.33	190.56	17.39
600	0.0197	-0.208	0.363		834	153.32	190.5	17.21
600	-0.14	0.118	-0.788		834	153.52	190.51	17.92
600	0.588	-0.792	0.716		834	153.49	190.61	18.15
600	-0.215	-0.0136	-0.296		834	153.55	190.77	17.83
600	0.329	0.248	0.807		834	153.4	190.75	18.09
600	0.501	-0.858	-0.658		834	153.43	190.64	16.7
600	0.452	-0.0326	-0.268		834	153.67	190.75	17.05
600	-0.192	0.46	0.0522		834	153.34	190.48	17.13
600	0.289	0.187	-0.706		834	153.6	190.48	17.27
600	-0.404	0.113	0.577		834	153.44	190.68	17.44
600	0.286	0.48	-0.787		834	153.6	190.6	18.2
600	-0.373	-0.0235	0.0161		834	153.38	190.77	17.72
600	0.391	0.0418	1.3		834	153.47	190.51	17.49
600	-0.502	-0.217	-0.422		834	153.53	190.69	17.67
600	-0.033	0.178	0.521		834	153.36	190.53	16.78
600	-0.181	-0.077	-0.259		834	153.31	190.57	17.15
600	0.217	-0.0289	-0.502		834	153.3	190.42	16.77
600	-0.109	-0.196	-0.718		834	153.33	190.66	16.96
600	0.44	0.00504	0.573		834	153.47	190.74	17.49
600	0.411	-0.467	0.545		834	153.35	190.5	16.78
600	-0.699	0.675	-1.18		834	153.2	190.63	16.42
600	0.135	-0.145	0.881		834	153.09	190.3	16.5
600	0.184	0.0391	0.981		834	152.94	190.32	15.67
600	0.415	-0.265	-0.465		834	152.9	190.23	15.66
600	0.255	0.0251	-0.48		834	153.23	190.53	15.41
600	-0.627	0.243	1.02		834	153.24	190.23	16.53
600	0.944	-0.621	-0.0931		834	153.18	190.27	15.91
600	0.333	0.314	-0.799		834	153.05	190.41	14.71
600	0.0648	-0.0402	0.164		834	152.87	190.07	14.93
600	0.55	-0.349	0.167		834	152.75	190.1	15.23
600	-0.286	0.465	0.886		834	152.91	190.37	14.55
600	0.058	-0.0631	-1.54		834	152.88	189.89	15.02
600	-0.991	0.637	0.387		834	152.73	190.19	14.38
600	-0.0571	0.0753	-1.14		834	152.9	190.23	15.06
600	-0.597	0.0558	1.5		834	152.78	190.25	13.95
600	-0.192	-0.0274	-0.858		834	152.83	190.08	14.46
600	0.0395	-0.318	-0.242		834	152.69	189.9	13.5
600	-0.118	0.0217	0.425		834	152.71	189.59	13.3
600	-0.27	0.158	0.342		834	152.82	189.88	14.11
600	-0.417	0.2	-0.927		834	152.8	190.09	13.89
600	-0.0405	0.0274	-0.56		834	152.64	189.93	12.94
600	0.32	0.289	0.943		834	152.65	189.98	12.64
600	0.0579	-0.115	-0.177		834	152.51	189.8	13.13
600	-0.0841	-0.305	-1.09		834	152.49	189.61	12.16
600	-0.0884	0.398	1.48		834	152.53	189.53	12.05
600	0.245	-0.254	-0.456		834	152.58	189.77	12.74
600	-0.306	0.381	0.23		834	152.3	189.96	12.11
600	0.206	0.442	-0.358		834	152.32	190.1	11.88
600	0.366	0.0212	0.206		834	152.59	189.77	12.51
600	0.203	-0.587	-1.55		834	152.34	189.54	10.88
600	-0.219	0.0362	1.06		834	152.18	189.71	10.78
600	0.307	-0.314	0.232		834	152.27	189.46	10.47
600	0.402	0.0629	-1.62		834	152.15	189.63	10.57
600	0.132	-0.18	2.42		834	152.08	189.73	10.14
600	-0.3	-0.0469	-1.93		834	152.11	189.53	10.36
600	0.26	-0.0135	0.314		834	152.11	189.59	10.58
600	-0.134	-0.165	0.0746		834	151.86	189.58	8.91
600	0.266	-0.282	1.62		834	151.96	189.66	8.61
600	0.0322	0.0484	-0.269		834	151.92	189.21	8.69
600	-0.408	0.291	-0.483		834	151.67	189.32	8.3
600	1.68	-2.47	-0.57		834	151.71	189.2	8.45
600	1.2	-1.17	-1.98		834	151.7	189.52	8.08
600	-0.324	0.536	-1.74		834	151.91	189.54	7.89
600	-0.155	-0.27	2.18		834	151.81	189.26	8.5
600	0.022	0.193	-0.176		834	151.69	189.24	7.29
600	-0.621	1.24	-1.17		834	151.66	189.17	7.09
600	0.453	-0.867	0.0596		834	151.55	189.21	6.93
600	2.03	-1.52	-0.0746		834	151.46	189.03	7.22
600	-0.0906	-0.154	-0.621		834	151.56	188.91	6.89
600	0.092	0.0729	0.294		834	151.39	189.51	6.11
600	2.23	-2.31	-0.26		834	151.44	189.33	4.72
600	-0.585	0.388	-0.986		834	151.29	189.13	5.25
600	0.121	0.209	1.58		834	151.46	188.83	5.23
649	0	0	0		834	151.29	188.89	5.14
649	92.54	212.84	12.72		834	151.29	189.08	4.74
649	-0.443	-1.13	-0.945		834	151.38	188.87	4.22
649	-0.529	0.28	0.319		834	151.42	189.08	4.69
649	-0.546	0.342	0.218		834	151.36	188.98	4.06
649	-0.484	0.455	0.678		834	151.21	189	4.11
649	-0.0959	0.0169	0.79		834	151.11	189.12	3.49
649	-0.0615	0.0422	0.252		834	151.06	188.93	3.38
649	-0.746	-0.759	-0.846		834	151.1	189	3.19
649	-0.307	-0.451	-0.208		834	150.99	189.18	3.49
649	-0.929	0.0862	-0.297		834	151.32	189.57	2.88
649	-0.263	-0.477	-0.147		834	151.21	189.3	2.65
649	-0.465	0.692	0.278		834	150.68	189.01	2.25
649	-0.174	0.101	0.668		834	151.03	188.65	1.86
649	-0.0739	0.276	0.0978		834	150.73	188.62	1.14
649	0.667	0.0868	0.279		834	150.72	188.83	1.56
649	1.09	-0.0344	-0.426		834	150.91	188.77	1.47
649	0.97	0.247	0.155		834	150.78	189.1	1.36
649	0.488	-2.09	-0.832		834	151.04	189	1.26
649	1.1	-1.01	-1.05		834	150.93	189	0.976
649	-0.278	-1.87	-0.827		834	150.75	188.88	0.915
649	0.829	-0.0192	-0.58		834	151.23	188.84	0.787
649	0.688	-0.553	0.202		834	150.61	188.69	0.575
649	0.106	0.119	-0.874		834	150.94	188.94	0.586
649	0.369	-0.0663	0.739		837	242.8	86.89	12.5
649	-0.0284	0.178	-0.644		837	241.29	83.29	16.67
649	-0.198	-0.279	-0.222		841	237.31	95.28	22.34
649	0.466	-0.562	-0.276		841	231.4	92.65	22.02
649	0.011	-0.361	-0.486		841	229.5	87.66	17.27
649	0.303	-0.108	-0.358		845	236.83	90.11	28.48
649	-0.31	0.181	0.183		845	239.08	88.44	25.52
649	0.107	-0.347	0.333		845	237.74	84.2	22.42
649	0.24	-0.119	-1.12		848	237.82	83.81	39.07
649	-0.393	-0.122	0.0615		848	237.55	76.28	37.8
649	-0.208	0.0784	-0.351		851	219.38	64.92	24.81
649	0.295	0.191	-0.383		851	219.49	61.45	25.73
649	0.109	-0.521	0.349		854	183.93	63.18	34.75
649	0.0659	0.465	-0.28		854	183.43	64.3	35.22
649	0.156	-0.242	-0.424		858	237.01	63.76	31.06
649	-0.192	0.612	0.485		858	238.1	64.11	32.1
649	0.194	-0.91	-0.497		858	231.35	61.06	34.83
649	0.202	-0.2	-0.597		861	200.29	67.61	29.24
649	-0.197	0.949	-0.081		861	205.49	65.5	25.07
649	0.495	0.84	0.974		864	210.92	81.73	25.2
649	-0.027	0.0319	-0.326		864	212.06	85.96	26.81
649	0.431	-1.46	-1.05		867	203.04	116.58	32
690	0	0	0		867	196.15	114.3	30.76
690	179.72	110.8	22.73		870	244.74	69.31	35.89
690	-0.478	0.248	0.0302		870	249.46	68.85	35.99
690	2.64	0.434	-0.298		876	247.18	65.7	28.77
690	-0.555	0.0382	0.81		876	243.55	67.53	24
690	0.787	0.00422	-0.0879		876	240.18	69.49	24.68
690	-0.684	-0.0135	-0.774		876	243.92	71.86	24.68
690	0.4	-0.134	0.378		876	244.71	72.47	21.78
690	0.317	0.324	0.976		879	240.17	57.73	31.36
690	-0.508	-0.234	0.344		879	242.23	59.44	36.75
690	0.504	0.0567	-0.584		883	233.19	56.18	19.22
690	-0.587	-0.0751	-0.67		883	228.79	53.77	23.06
690	0.381	0.0338	0.391		883	225.67	48.25	22.36
690	0.156	0.218	0.403		886	244.41	43.69	20
690	1.27	-0.134	0.454		886	249.4	47.04	23.62
690	-0.578	0.199	-0.693		892	226.53	50.29	31.54
690	-0.119	-0.166	-1.04		892	229.05	56.44	27.84
690	-0.561	0.0641	0.543		892	223.99	56.6	30.24
690	-0.0106	-0.117	0.141		892	224.94	53.28	34.39
690	0.446	0.213	-0.259		892	218.66	52.17	33.96
690	-0.0452	0.203	-0.261		895	207.88	67.6	35.04
690	0.314	-0.151	0.301		895	202.85	72.38	33
690	-0.54	-0.081	-0.874		898	229.9	66.25	24.2
690	0.577	-0.0166	0.72		898	229.08	62.39	22.84
690	-0.252	-0.12	-0.511		901	8.31	1.41	18.61
690	-0.554	-0.37	-0.75		901	8.41	2.9	21.82
690	0.155	0.148	0.392		906	244.77	70.13	34.49
690	0.414	0.0839	-0.649		906	247.58	72.11	27.58
690	0.0503	0.307	0.239		906	248.19	66.63	28.77
690	-0.514	-0.3	-0.695		906	242.78	63.03	26.94
690	-0.199	-0.129	-0.148		909	188.7	72.88	35.26
690	0.506	0.434	0.78		909	187.08	78.36	36.19
690	0.0595	-0.036	-0.309		912	206.6	76.16	41.21
690	-0.0115	-0.395	-1.87		912	210.83	80.79	40.34
690	0.0408	-0.0292	1.49		915	214.73	93.36	21.94
690	0.151	-0.328	-0.117		915	219.76	95.41	25.16
690	-0.0962	-0.186	-1.03		928	71.87	45.03	11.16
690	0.052	0.284	0.207		928	71.72	46.05	10.56
725	0	0	0		928	72.65	46.3	10.58
725	171.6	178.3	26.75		928	72.27	45.52	10.32
725	-0.455	0.525	-0.566		928	71.49	45.53	9.63
725	0.301	0.114	-0.242		928	72.56	46.84	10.75
725	-0.932	0.392	-0.21		928	72.34	45.69	9.93
725	-0.19	0.452	-0.227		928	72.11	45.05	9.12
725	0.115	-0.0474	-0.776		928	72.43	46.29	9.01
725	-0.43	0.408	-2.05		928	72	46.28	8.98
725	-0.548	0.336	-0.498		928	71.46	45.73	7.16
725	-0.369	-0.511	0.504		928	72.1	43.86	6.85
725	0.174	0.106	0.711		934	231.13	69.63	29.26
725	-0.436	0.412	-1.42		934	231.97	71.03	29.29
725	-0.228	0.372	-0.35		934	227.2	69.05	26.21
725	-0.268	0.611	-1.18		934	228.62	72.67	24.24
725	-0.0473	0.468	-0.212		934	232.72	75.48	19.86
725	0.00524	-0.0594	-0.603		937	200.81	82.25	20.76
725	-0.163	0.0525	-0.779		937	200.36	83.69	18.51
725	-0.0382	0.0389	-1.04		940	251.57	97.34	28.31
725	-0.03	-0.536	0.251		940	251.8	93.59	31.55
725	-0.221	-0.00445	-1.31		943	234.76	87.32	20.56
725	0.115	-0.318	0.0416		943	230.45	83.1	16.77
725	0.0714	-0.136	0.395		947	210.75	95.21	32.76
725	0.0911	-0.102	-0.249		947	210.69	93.11	30.4
725	0.385	-0.129	0.116		947	213.37	87.77	30.12
725	-0.0689	-0.266	0.97		951	234.35	58.37	39.72
725	0.341	-0.0317	-0.196		951	236.17	61.89	36.9
725	0.363	-0.588	0.621		951	231.49	63.24	38.61
725	0.108	-0.545	1.37		954	242.57	57.88	23.82
725	0.555	-0.424	0.175		954	243.9	53.97	24.68
725	0.104	-0.169	0.0105		960	234.14	62.65	28.19
725	0.443	-0.234	1.33		960	235.74	67.38	28.65
725	0.86	-0.438	0.925		960	235.26	67.06	26.31
725	0.561	-0.351	0.553		960	233.9	68.25	31.3
725	1.14	-0.854	2.36		960	234.21	68.71	27.99
753	0	0	0		965	251.59	54.99	31.38
753	51.27	179.89	26.28		965	249.87	51.69	27.53
753	0.315	0.37	-0.655		965	249.98	49.62	27.79
753	0.0969	-0.0223	-1.76		965	244.91	49.52	33.31
753	-0.0323	0.314	-0.511		969	239.45	64.4	36.5
753	0.0925	-0.707	-0.982		969	240.08	63.81	31.02
753	-0.115	-0.0444	0.302		969	240.07	63.17	31.83
753	-0.0493	-0.0117	-3.2		972	233.1	79.97	31.36
753	0.444	0.0695	4.69		972	230.07	75.27	30.43
753	-0.523	-0.308	-2.08		977	230.66	60.27	33.49
753	0.112	0.3	-1.93		977	229.26	57.01	28.6
753	-0.152	0.0747	2.83		977	234.63	55.63	26.56
753	0.143	-0.0993	-0.387		977	229.61	59.24	25.94
753	-0.615	0.302	-0.536		983	213.98	68.52	29.65
753	0.371	-0.345	-4.83		983	217.87	71.31	27.25
753	-0.0935	-0.386	0.863		983	218.58	77.91	30.16
753	3.37	-2.74	-1.49		983	225.5	75.59	29.86
753	0.189	1.44	0.199		983	221.55	73.88	34.37
753	0.0121	0.347	-0.425		987	240.59	85.32	33.04
753	-0.473	0.019	0.813		987	239.09	81.84	30.83
753	1.01	1.63	0.693		987	241.23	82.7	32.41
753	-0.18	-0.891	-1.38		991	226.86	102.04	31.15
772	0	0	0		991	222.7	102.82	34.8
772	68.72	132.78	42.46		991	220.97	95.6	35.16
772	0.23	0.234	-0.378		994	241.45	54.3	29.67
772	0.373	1.32	-0.513		994	235.89	50.07	31.75
772	0.403	1.61	-1.01		997	217.64	60.62	37.17
772	0.271	0.916	-0.519		997	216.66	60.18	35.74
772	-0.201	-0.725	-0.945		1000	198.57	75.26	39.54
772	-0.963	-0.241	-0.984		1000	194.83	77.92	33.99
772	-0.108	-0.228	0.582		1003	231.63	90.61	31.36
772	-0.212	0.595	2.17		1003	230.87	92.69	37.81
772	-0.718	0.209	-1.24		1008	211.09	103.62	25.58
782	0	0	0		1008	208.32	107.51	31.42
782	64.93	150.53	20.88		1008	209.68	101.18	32.79
782	1.7	-0.822	0.468		1008	208.84	105.36	32.99
782	0.831	-0.257	-1.11		1011	199.55	103.33	35.11
782	-0.237	0.623	-1.14		1011	199.51	103.64	32.61
782	0.725	-0.533	1.44		1014	91	229.2	0.256
782	1.98	-0.639	-0.4		1014	91.46	229.48	0.398
782	1.72	-0.302	-1.07		1018	235.99	102.57	25.37
782	0.494	-0.636	-1.32		1018	238.98	102.7	19.15
791	0	0	0		1018	236.34	104.86	16.32
791	166	126.16	26.14		1021	68.02	37.97	15.07
791	-0.843	0.846	-1.9		1021	66.38	37.79	20.42
791	1.17	1.43	-1.16		1025	233.8	97.14	31.25
791	-0.3	-0.456	0.403		1025	229.6	94.76	27.34
791	0.17	0.035	-0.726		1025	228.02	93.73	24.65
791	0.192	0.0214	-0.8		1028	194.74	78.08	28.31
791	-0.405	-0.899	1.04		1028	194.28	80.65	29.92
797	0	0	0		1031	226.8	83.15	30.54
797	25.37	182.68	15.86		1031	222.97	83.87	32.94
797	-0.585	0.384	1.12		1035	238.31	51.8	22.79
797	0.24	0.311	-1.09		1035	238.92	57.26	20.12
797	-0.221	0.223	-0.00874		1035	242.26	60.4	25.97
803	0	0	0		1038	247.95	112.73	26.19
803	186.24	36	52.08		1038	242.42	109	29.16
803	0.131	1.31	-2.03		1041	215.12	105.91	32.11
803	0.383	0.263	0.957		1041	217.2	102.25	33.75
803	-0.648	-0.824	-0.291		1047	246.11	51.34	20.63
806	0	0	0		1047	246.25	47.12	23.68
806	193.41	186.44	10.46		1047	244.36	49.48	20.37
809	0	0	0		1047	248.63	56.17	20.98
809	167.51	205.16	1.84		1047	243.26	53.7	24.21
812	0	0	0		1052	244.47	63.52	36.39
812	24.98	152.2	1.69		1052	245.98	68.66	36.07
816	0	0	0		1052	248.34	70.57	37.17
816	52.43	180.22	17.78		1052	244.67	69.93	33
816	-0.479	-0.0851	0.13		1056	224.58	78.17	35.08
825	0	0	0		1056	230.07	74.21	32.88
825	22.4	153.93	2.77		1056	234.26	77.13	32.45
825	0.467	1	-1.63		1062	243.84	72.75	23.28
825	0.35	-1.15	1.27		1062	244.48	77.05	25.62
825	0.0956	-0.253	-1.09		1062	248.51	78.92	31.07
825	-0.246	0.4	2.09		1062	248.39	78.54	33.98
825	0.864	-1.15	-0.808		1062	250.79	78.97	39.07
825	0.132	-0.326	-1.1		1070	208.82	58	26.13
875	0	0	0		1070	213.62	63.29	24.85
875	26.17	186.42	17.86		1070	211.43	62.65	30.23
875	0.0709	0.276	-1.21		1070	208.65	68.7	32.47
875	0.387	0.194	1.37		1070	212.68	73.48	37.23
875	-0.291	-0.235	-0.573		1070	208.09	74.74	36.11
875	0.0345	-0.363	1.09		1070	203.91	73.2	36.45
875	-0.446	-0.298	-0.951		1073	240.92	46.96	16.89
875	0.409	-0.00156	0.976		1073	236.56	45.34	17.11
875	0.13	0.897	-1.47		1076	225.97	66.47	24.52
875	0.0226	-1.03	1.05		1076	228.94	65.82	19.47
875	-0.213	0.22	-0.412		1219	95.46	231.99	19.62
875	0.238	-0.488	0.00292		1219	95.18	231.43	18.67
875	0.249	1.64	-2.12		1219	95.71	231.54	18.18
875	-0.422	-1.01	2.27		1219	95.29	231.84	18.85
875	-0.182	-0.169	0.539		1219	95.16	231.56	19.27
875	0.17	-0.098	0.824		1219	95.08	232.01	18.28
875	-0.378	-1.55	1.78		1219	95.25	231.7	18.8
875	0.476	1.35	-3.23		1219	95.04	232.94	19.15
875	-0.406	0.727	-0.659		1219	95.15	231.78	18.49
875	-0.504	-2.66	2.88		1219	94.76	231.33	18.09
875	0.0513	-1.22	1.4		1219	94.92	231.8	17.23
875	-0.346	0.403	-1.9		1219	95.05	231.55	17.36
875	0.596	0.344	0.683		1219	94.8	232.03	17.75
875	-0.25	0.0435	-0.594		1219	94.88	231.78	17.86
875	0.876	0.036	0.441		1219	95.17	231.69	17.89
875	-0.783	-1.26	0.747		1219	94.29	231.11	16.68
875	0.597	1.17	0.568		1219	95.07	230.99	16.94
875	-0.193	-0.29	-0.939		1219	94.75	231.1	17.17
875	0.0259	0.259	-0.787		1219	94.7	231.31	16.81
875	0.282	0.265	-0.0569		1219	94.62	231.41	16.99
875	-0.07	-0.851	0.0969		1219	94.46	231.37	16.54
875	0.144	0.677	1.6		1219	94.53	231.22	15.41
875	0.00448	0.137	-1.6		1219	94.63	231.22	16.1
875	0.274	0.345	-0.668		1219	94.32	231.12	15.97
875	-0.745	-0.478	1.06		1219	94.26	230.82	15.48
875	0.156	0.0792	0.291		1219	94.27	231.26	15.92
875	-0.262	-0.353	-0.231		1219	94.4	230.94	16.14
875	0.421	0.0989	-1.23		1219	94.32	231.17	15.39
875	0.215	0.00783	-0.117		1219	94.4	231.08	15.71
875	-0.566	0.139	0.167		1219	94.43	231.04	15.68
875	0.674	0.337	-0.628		1219	94.1	231.01	15.35
875	-0.11	0.0629	-0.254		1219	94.47	230.69	14.68
875	-0.751	-0.722	-0.11		1219	94.11	230.78	14.2
875	-0.322	0.227	0.128		1219	94.18	230.83	14.87
875	0.71	0.397	-0.157		1219	93.97	231.04	15.18
875	0.586	0.235	1.44		1219	94.11	231.08	14.21
875	-0.444	0.257	-1.51		1219	94.16	231.13	13.97
875	0.432	-0.864	0.479		1219	94.21	231.09	14.4
887	0	0	0		1219	93.58	230.7	13.97
887	191.4	188.42	16.07		1219	94.05	230.4	14.95
887	1.66	-0.909	0.352		1219	93.68	231.11	15.34
887	0.0108	-0.899	-1.08		1219	94.1	230.83	15.41
887	-0.326	0.945	-0.546		1219	94.15	231.18	14.79
887	0.0758	-0.0521	0.649		1219	94.28	231.37	14.94
887	2.56	-1.22	-2.51		1219	94.21	231.17	15.11
887	0.0271	0.257	-0.369		1219	93.93	230.7	14.74
887	0.535	0.195	-2.29		1219	93.91	230.96	14.92
981	0	0	0		1219	94.13	230.47	13.69
981	164.75	128.91	28.46		1219	94.04	230.86	14.88
981	0.258	-0.0751	-0.451		1219	94.41	231.3	15.62
981	0.0396	-0.0483	0.963		1219	94.08	231.1	15.87
981	0.116	0.00188	-0.466		1219	94.09	230.66	14.94
981	0.0625	0.0335	0.31		1219	94.16	231.02	14.78
981	0.192	-0.292	-0.386		1219	93.87	231.07	14.7
981	0.447	0.725	-0.235		1219	94.13	230.88	15.17
981	1.13	0.0222	-0.557		1219	94.08	231.1	15.83
981	-0.296	-0.326	0.586		1219	94.14	231.09	14.92
981	-0.0925	-0.164	-1.26		1219	93.93	230.87	15.52
981	-0.263	0.477	1.42		1219	94.17	230.95	15.05
981	-0.436	-0.278	0.244		1219	93.88	230.87	15.05
981	0.164	-0.243	-1		1219	93.96	230.71	14.68
981	0.219	0.238	0.406		1219	94.12	230.83	13.85
981	-0.289	-0.25	0.282		1219	94.05	230.65	13.86
981	0.403	0.194	0.242		1219	93.8	230.83	15.61
981	-0.251	-0.198	-0.176		1219	94.04	231.08	14.23
981	-0.109	0.0225	0.697		1219	94	230.84	14.25
981	0.182	-0.362	-0.47		1219	93.85	230.72	14.6
981	-0.609	0.0168	0.533		1219	93.86	230.84	13.25
981	0.482	0.267	-0.121		1219	93.9	230.46	14.19
981	0.213	-0.00739	-0.125		1219	93.85	230.73	14.82
981	-0.23	0.353	-0.128		1219	94.19	230.7	14.05
981	0.509	-0.242	-0.317		1219	93.82	230.72	13.53
981	0.986	0.928	0.803		1219	94.22	231.18	14.53
981	-0.816	-0.598	-1.27		1219	93.87	230.74	14.01
981	-0.263	-0.183	1.08		1219	93.81	230.72	13.29
981	-0.019	-0.504	-1.05		1219	93.89	230.4	12.65
981	0.331	0.252	0.179		1219	93.64	230.67	13.38
981	0.752	0.745	-0.843		1219	93.41	230.46	13.06
981	-0.292	-0.187	0.976		1219	93.75	230.36	13.3
981	0.334	-0.119	-1.53		1219	93.54	230.59	12.96
981	0.173	0.217	1.1		1219	93.74	230.75	13.01
981	-0.121	0.196	-0.374		1219	93.55	230.49	11.01
981	0.227	-0.12	0.0512		1219	93.39	230.19	10.75
981	0.0771	0.647	-1.36		1219	93.33	230.59	11.63
981	-0.177	-0.191	1.04		1219	93.56	230.4	11.46
981	0.395	0.365	-0.788		1219	93.32	230.18	11.93
981	-0.902	-0.44	1.18		1219	93.37	230.51	12.04
981	0.318	-0.112	-0.849		1219	93.23	230.07	11.38
981	0.312	0.215	0.167		1219	93.08	230.27	11.88
981	-0.285	-0.00766	-0.194		1219	93.26	230.42	11
981	-0.0575	0.137	0.169		1219	93.15	230.36	11.26
981	-0.0148	-0.117	0.846		1219	93.06	229.79	10.87
981	0.286	-0.176	0.291		1219	93.27	230.2	11.13
981	-0.529	0.206	-0.343		1219	93.31	230.45	10.88
981	0.266	-0.333	-0.384		1219	93.31	230.14	10.42
981	0.177	0.398	-0.589		1219	92.96	230.32	10.64
981	0.25	-0.242	-0.177		1219	92.7	229.94	9.37
981	-0.383	-0.235	0.807		1219	93.05	230.04	9.88
981	-0.123	0.0333	-0.00893		1219	92.93	229.9	9.72
981	0.328	-0.606	-0.344		1219	92.99	230	9.44
981	0.117	-0.451	-0.351		1219	92.78	229.97	9.72
981	-0.71	0.338	-0.15		1219	92.95	230.37	9.93
981	0.719	0.819	-0.34		1219	93.29	230.21	8.48
981	-0.307	-0.66	1.13		1219	92.74	230.08	8.53
981	0.381	0.647	-1.21		1219	92.47	229.73	7.89
981	0.308	-0.294	-1.05		1219	92.76	229.48	7.63
981	1.31	1.02	0.403		1219	92.54	230.03	8.33
981	-0.153	0.104	-0.797		1219	92.79	230.06	7.29
981	0.353	-0.413	0.793		1219	92.53	230.18	7.73
981	-0.328	-0.355	-0.682		1219	92.44	229.55	6.92
981	0.223	1.52	0.373		1219	92.47	229.8	6.79
981	0.62	-1.24	0.45		1219	92.49	229.37	6.08
981	-0.918	0.461	-0.818		1219	92.31	229.46	6.53
981	0.148	0.214	-0.109		1219	92.33	229.74	6.33
981	0.347	0.645	0.618		1219	92.21	229.76	5.98
981	-0.0447	-0.92	-0.426		1219	92.46	229.65	5.87
981	-0.986	-0.454	-0.00696		1219	91.94	229.45	5.65
981	0.51	0.477	-0.862		1219	92.07	228.96	5.27
981	0.01	0.3	1.35		1219	92	229.47	4.37
981	0.792	-0.445	0.652		1219	91.97	229.25	4.16
981	-0.603	-0.186	-1.31		1219	92.1	229.36	4.27
981	0.107	0.529	-1.03		1219	92.24	229.73	4.64
981	-0.405	-0.315	0.15		1219	92.06	229.76	3.85
981	-0.506	-0.492	1.37		1219	92.19	229.72	3.55
981	0.865	-0.0261	-0.183		1219	91.77	229.13	3.28
981	-0.214	0.135	-1.03		1219	91.64	228.96	2.81
981	0.503	0.228	-0.509		1219	92.07	229.05	3.22
981	0.449	0.395	0.924		1219	91.68	229.43	2.8
981	-0.563	-0.113	-0.095		1219	91.87	229.54	2.97
981	-0.384	-0.107	-0.944		1219	91.77	229.52	3.07
981	-0.148	-0.205	0.109		1219	91.68	229.96	2.2
981	0.491	0.26	-0.619		1219	91.83	229.97	2.23
981	-0.269	-0.177	-0.0693		1219	91.49	229.29	2.08
981	0.134	0.297	0.058		1219	91.47	229.28	1.74
981	0.561	-0.145	-1.53		1219	91.42	229.19	1.9
981	-0.195	0.00557	1.01		1219	91.61	229.65	1.7
985	0	0	0		1219	91.56	229.68	1.7
985	211.81	79.06	40.38		1219	91.49	229.67	1.29
985	-0.0457	-0.163	-0.935		1219	91.68	229.73	1.03
992	0	0	0		1219	91.26	228.99	0.855
992	186.08	36.61	51.55		1219	91.97	229.12	1.01
992	-0.352	0.163	-0.0455		1219	91.67	228.98	0.882
992	0.362	0.363	-0.672		1362	250.68	237.21	20.87
992	0.676	-0.308	1.08		1362	250.41	237.06	20.36
992	-0.695	0.0102	-1.16		1362	250.46	237.12	19.67
1078	0	0	0		1362	250.43	237.02	20.27
1078	35.78	232.86	0.809		1362	250.4	236.89	20.29
1078	-0.515	0.482	0.00639		1362	250.45	236.78	18.93
1078	1.9	-1.12	0.318		1362	250.54	236.94	19.59
1078	-0.117	1.43	0.117		1362	250.55	237.35	19.74
1078	-0.67	-0.16	0.353		1362	250.52	236.74	19.44
1078	0.893	-0.366	-0.449		1362	250.45	236.74	19.25
1078	0.219	-0.231	-0.00233		1362	250.34	236.77	18.48
1078	-0.619	0.201	0.0303		1362	250.31	236.73	19.01
1078	-0.229	0.0994	0.33		1362	250.47	236.87	18.61
1078	0.951	-0.316	-0.466		1362	250.3	236.91	19.29
1078	-0.308	0.28	0.847		1362	250.44	236.71	19.48
1078	0.0557	-0.286	-0.321		1362	250.3	236.55	17.88
1078	0.174	0.554	-0.578		1362	250.25	236.73	17.92
1078	0.527	-0.163	0.168		1362	249.92	236.36	18.43
1078	-0.165	0.463	-0.0799		1362	249.86	236.41	17.49
1078	-0.516	-0.00522	0.346		1362	250.14	236.17	17.81
1078	1.63	0.0148	-0.247		1362	249.79	236.69	18
1078	-0.38	0.316	0.571		1362	250.08	236.26	16.61
1078	-0.455	-0.476	-0.233		1362	250.04	236.51	17.46
1078	-0.933	0.276	-0.113		1362	250.11	236.07	17.12
1078	1.78	-0.128	0.336		1362	249.88	236.33	17.44
1078	-0.664	-0.072	0.826		1362	249.74	236.14	17.73
1078	1.46	0.301	-0.993		1362	249.84	236.42	17.1
1078	0.297	-0.597	-0.454		1362	249.97	236.24	17.17
1078	-0.842	0.368	1.01		1362	249.8	236.4	17.27
1078	-0.501	0.251	0.0546		1362	249.82	235.94	16.95
1078	0.565	-0.0397	-0.708		1362	249.94	235.98	16.61
1078	-0.0609	-0.404	0.867		1362	249.61	236.13	17.01
1078	0.384	0.305	-0.162		1362	249.9	235.63	15.66
1078	-0.103	-0.0383	-0.235		1362	249.69	235.95	16.26
1078	1.12	0.169	-0.363		1362	249.79	235.76	16.41
1078	-0.421	-0.0552	0.157		1362	249.84	236.35	16.69
1078	0.135	0.233	-0.0249		1362	249.87	235.76	14.7
1078	1.24	0.00745	-0.247		1362	249.72	235.95	15.99
1078	-0.556	-0.511	-0.25		1362	249.6	235.78	15.82
1078	0.976	0.157	0.295		1362	249.69	236.03	17.48
1078	-0.914	0.0165	0.275		1362	249.92	235.9	16.85
1078	-0.275	0.0663	-0.0804		1362	249.69	236.11	17.01
1078	0.136	0.0904	0.552		1362	249.78	236.19	17.13
1078	1.08	0.0609	-0.133		1362	249.47	236.32	16.8
1078	-0.899	-0.0615	-0.0317		1362	249.82	236.04	17.62
1078	1.28	-0.439	2.21		1362	249.6	235.82	16.34
1078	-0.34	0.119	-1.36		1362	249.89	235.64	16.46
1078	-0.339	-0.0485	0.338		1362	249.65	235.74	15.7
1078	-0.013	-0.247	0.0578		1362	249.71	236.01	16.69
1078	0.137	0.00636	-0.991		1362	249.92	236.27	17.57
1078	0.287	0.132	0.106		1362	249.74	236.29	17.48
1078	-0.157	0.125	0.165		1362	249.76	236.11	16.74
1078	-0.123	-0.21	0.168		1362	249.63	235.91	16.51
1078	-0.0619	0.212	-0.0855		1362	249.41	235.79	15.4
1078	-0.26	0.0204	0.842		1362	249.68	235.69	16.4
1078	-0.142	0.083	-0.706		1362	249.49	235.96	16.59
1078	0.292	0.237	0.599		1362	249.55	236.12	15.87
1078	0.23	-0.512	-1.43		1362	249.42	236.14	16.85
1078	0.145	-0.0435	0.117		1362	249.56	236.51	18
1078	-0.575	0.0652	0.131		1362	249.63	236.36	18.02
1078	0.241	-0.66	0.421		1362	249.29	235.88	16.67
1078	-0.162	0.625	-0.505		1362	249.84	235.83	15.61
1078	-0.678	-0.0218	0.213		1362	249.74	235.69	15.58
1078	0.154	0.0242	-0.0157		1362	249.53	236.32	17.86
1078	-0.0718	0.304	0.465		1362	249.62	236.17	17.01
1078	0.779	-0.232	-0.475		1362	249.53	236	16.24
1078	-0.819	-0.0787	0.969		1362	249.45	236.01	16.83
1078	0.496	-0.0108	-0.669		1362	249.25	236.01	16
1078	-0.205	-0.497	-0.144		1362	249.22	236.03	15.18
1078	-0.541	0.652	-0.0333		1362	249.33	235.8	16.31
1078	1.34	-0.774	-0.524		1362	249.33	236.01	15.92
1078	-0.758	0.353	0.51		1362	249.22	236.39	16.14
1078	-0.123	0.308	-0.462		1362	249.1	236.11	15.87
1078	0.211	0.00636	0.0314		1362	248.64	236.17	15.43
1078	1.17	-0.608	-0.13		1362	249.38	235.74	14.93
1078	-0.292	0.363	0.173		1362	249.21	235.66	14.22
1078	-0.121	-0.355	0		1362	249.4	235.69	16.08
1078	0.00216	-0.334	-0.32		1362	249.09	235.55	15.77
1078	0.0512	0.228	0.562		1362	249.1	235.95	15.02
1078	0.0248	-0.218	-0.415		1362	248.98	235.98	16.58
1078	0.505	-0.697	-0.472		1362	249.37	235.49	13
1078	1.01	0.384	-0.182		1362	249.09	235.79	13.33
1078	-0.166	-0.432	-0.563		1362	248.82	235.48	12.92
1082	0	0	0		1362	248.57	235.39	13.73
1082	169.44	166.96	25.74		1362	248.83	235.35	13.22
1082	-0.684	-0.817	0.389		1362	248.84	235.74	13.98
1085	0	0	0		1362	248.56	236.06	14.1
1085	60.42	149.88	24.54		1362	249.03	235.56	14.11
1109	0	0	0		1362	248.88	235.56	12.92
1109	211.01	78.87	44.22		1362	248.72	235.16	12.63
1109	0.133	0.0146	-2.47		1362	248.14	235.15	13.21
1109	0.868	-0.804	1.77		1362	248.61	235.1	12.88
1109	-0.99	1.07	-0.0212		1362	249.01	235.44	13.01
1109	1.19	-1.32	-0.214		1362	248.84	235.29	12.45
1109	-0.663	0.83	-0.615		1362	248.48	235.48	12.04
1109	0.352	0.179	0.779		1362	248.75	235.18	11.89
1109	-0.869	0.0838	-0.652		1362	248.84	235.32	11.95
1109	0.552	-0.123	0.926		1362	248.42	235	11.35
1109	1.97	-0.78	-0.724		1362	248.61	234.96	12.13
1109	1.01	-0.636	-0.0534		1362	248.53	235.64	13.28
1109	-0.635	0.294	0.918		1362	248.57	235.48	11.81
1109	0.391	-0.893	0.416		1362	248.78	235.26	10.93
1109	0.0294	0.718	-2.71		1362	248.46	235.38	11.71
1109	0.401	-0.634	1.56		1362	248.04	234.93	9.73
1109	-0.671	0.96	0.163		1362	248.16	234.93	10.05
1109	0.102	-0.573	-1.27		1362	247.89	235.12	9.23
1109	0.572	-0.119	1.02		1362	248.24	235.09	9.38
1109	-0.331	-0.154	-0.367		1362	248.14	235.22	9.17
1109	0.22	0.437	-0.448		1362	248.01	235.16	9.12
1109	0.517	-1.17	0.833		1362	247.88	234.78	9.44
1138	0	0	0		1362	247.97	234.8	7.68
1138	184.36	171.34	1.32		1362	247.7	234.65	7.75
1138	0.352	0.277	-0.103		1362	247.73	234.5	7.46
1138	0.187	0.172	-0.41		1362	247.97	234.58	8.07
1138	-0.0746	-0.206	0.31		1362	247.42	234.4	7.17
1138	0.262	0.391	-0.257		1362	247.45	234.79	7.79
1138	-0.265	-0.495	-0.133		1362	247.69	234.94	6.38
1138	0.532	0.188	0.163		1362	248.19	234.53	5.62
1138	-0.289	-0.329	0.151		1362	247.51	234.44	6.38
1138	-0.0564	0.399	0.148		1362	247.63	234.54	5.07
1138	0.267	-0.0621	0.0719		1362	247.98	234.47	4.79
1138	-0.554	0.0724	-0.363		1362	247.54	234.4	5.86
1138	0.107	-0.171	0.14		1362	247.95	234.04	4.96
1138	0.216	0.168	0.0901		1362	247.31	234.75	3.81
1138	-0.0485	-0.26	0.0153		1362	247.34	234.61	4.89
1138	-0.309	0.197	-0.126		1362	247.57	234.34	3.78
1138	0.512	-0.268	-0.256		1362	247.51	234.69	4.32
1138	0.0667	0.34	0.355		1362	246.8	234.57	4.61
1138	-0.919	-0.588	-0.3		1362	247.52	234.78	4.01
1138	0.0558	0.151	0.0876		1362	247.08	234.66	3.37
1138	0.858	0.681	-0.12		1362	247.33	234.46	3.61
1138	-0.467	-0.668	-0.0161		1362	247.11	234.64	2.85
1138	-0.159	2.47	0.368		1362	246.92	234.5	2.45
1138	0.203	-2.5	0.0592		1362	247.42	234.49	2.26
1138	0.271	3.15	-0.432		1362	247.31	234.02	2.54
1138	1.54	3.24	0.073		1362	247.5	234.1	1.54
1138	-0.852	2.26	0.611		1362	246.86	234.57	2.59
1146	0	0	0		1362	246.54	234.94	2.03
1146	60.88	160.29	19.26		1362	246.83	234.88	2.67
1146	-0.262	-0.353	-1.44		1362	246.8	234.54	2.47
1146	0.178	0.427	1.93		1362	246.7	234.08	1.51
1146	-0.897	0.101	-2.14		1362	246.3	234.17	1.96
1146	-0.673	0.0993	-0.643		1367	241.06	82.15	25.29
1155	0	0	0		1367	238.99	82.77	23.28
1155	46.79	176.96	15.67		1367	239.65	84.19	21.89
1155	0.532	0.407	-0.177		1367	244.59	86.53	18.85
1155	-0.475	-1.24	2.79		1370	213.96	91.46	23.47
1155	1.26	-0.946	-0.623		1370	214.62	87.18	19.85
1155	-0.894	0.788	0.276		1376	197.75	67.2	33.82
1155	-0.071	0.112	-0.0203		1376	203.42	62.34	34
1171	0	0	0		1376	209.04	58.07	35.73
1171	25.19	152.71	2.68		1376	202.53	59.22	34.8
1171	1.1	-0.706	0.13		1376	208.92	62.88	37.53
1171	-0.58	0.18	-0.0927		1381	237.32	72.74	25.53
1171	0.477	-1.14	0.78		1381	235.41	69.09	21.84
1171	0.837	0.656	-0.725		1381	236.68	72.02	21.07
1171	0.25	-0.449	-0.804		1381	241.06	68.67	20.14
1171	-0.315	0.672	-0.479		1384	252.09	63.2	32.26
1171	-0.815	-1.69	-0.0717		1384	245.98	64.07	34.64
1171	1.41	1.52	0.0999		1388	232.13	83.14	38.59
1171	0.0275	-0.248	-0.545		1388	233.64	83.51	35.23
1171	1.62	-1.41	0.032		1388	236.74	82.55	38.75
1174	0	0	0		1391	202.12	70.82	33.72
1174	102.43	53.91	5.8		1391	199.17	71.62	26.69
1193	0	0	0		1394	45.6	8.87	30.59
1193	186.28	38.59	52.01		1394	51.4	6.34	28.41
1193	0.763	-0.18	0.38		1400	250.72	60.37	32.01
1193	-0.169	-0.749	0.178		1400	245.32	61.55	31.27
1193	1.2	-0.76	0.0812		1400	243.64	55.59	31.57
1193	0.121	0.271	0.0781		1400	238.91	51.6	31.87
1193	0.387	-1.82	1.03		1400	241.46	56.1	34.6
1193	-0.704	0.0456	-0.462		1403	208.04	84.67	32.3
1193	0.297	0.611	-0.785		1403	210.91	82.58	26.13
1193	0.276	-1.26	1.29		1406	196.06	89.31	35.39
1193	-0.197	1.02	-1.2		1406	196.14	82.59	38.35
1193	0.375	-0.687	0.543		1409	194.89	70.93	34.14
1193	-0.159	0.0485	0.0379		1409	191.67	66.59	36.21
1193	-0.0725	-0.671	0.44		1417	246.85	50.91	15.42
1193	-0.41	0.145	-0.238		1417	251	53.84	19.07
1193	0.504	-0.574	0.102		1417	250.26	49.37	25.14
1196	0	0	0		1417	251.78	53.55	26.06
1196	182.03	161.74	23.67		1417	250.92	56.72	27.61
1201	0	0	0		1417	245.91	60.9	26.65
1201	170.82	167.13	25.22		1417	246.13	58.72	28.58
1201	1.6	0.647	-2.81		1420	210.89	76.14	35.48
1209	0	0	0		1420	216.5	78.07	33.11
1209	86.15	225.98	41.67		1425	216.64	94.24	36.28
1209	0.184	-0.114	-1.25		1425	213.13	96.94	33.13
1209	-0.225	0.0245	0.0817		1425	212.73	99.27	34.38
1209	-0.96	-0.0579	0.328		1425	213.82	96.48	33.44
1225	0	0	0		1428	210.46	78.97	16.8
1225	168.03	204.32	4.62		1428	207.85	77.08	18.37
1225	0.243	-0.205	-0.0517		1431	204.04	88.93	33.39
1225	0.614	-1.2	-0.397		1431	206.75	90.59	31.57
1225	-0.462	-0.975	0.48		1437	238.8	65.28	30.35
1225	-0.394	2.32	-0.689		1437	235.82	60.34	29.36
1225	-0.23	-0.107	-0.283		1437	238.31	60.03	23.43
1225	0.673	-1.22	1.84		1437	236.59	59.7	26.35
1225	-0.525	-0.104	0.627		1437	234.1	60.27	26.03
1225	-0.183	0.537	-1.3		1440	223.86	56.55	34.18
1225	0.714	-0.61	-0.384		1440	226.15	53.64	36.69
1225	0.0942	-0.0353	-0.727		1444	237.43	84.23	33.2
1225	-0.203	-0.882	-0.148		1444	238.36	88.53	30.19
1225	-0.477	0.631	0.777		1444	231.37	89.98	28.61
1225	0.508	0.203	-0.879		1447	215.65	81.82	23.4
1231	0	0	0		1447	222.7	84.95	24.38
1231	181.29	162.35	19.58		1450	219.39	87.49	36.31
1231	0.25	0.0854	1.43		1450	221.75	94.04	36.2
1231	0.424	-0.315	1.01		1453	235.74	92.39	22.6
1231	0.288	-0.541	-1.12		1453	237.53	91.16	23.37
1256	0	0	0		1459	224.55	59.09	23.69
1256	191.3	188.54	16.96		1459	222.6	63.04	25.08
1256	-0.126	0.198	0.796		1459	221.38	67.06	24.56
1256	1.01	-0.44	-1.55		1459	217.57	69.91	26.12
1256	1.28	0.172	0.018		1459	217.14	68.03	28.2
1256	-0.298	-0.314	-1.16		1462	246.42	57.56	35.24
1256	-0.21	0.174	0.898		1462	247.43	55.56	32.7
1256	0.85	-0.627	-1.14		1465	199.08	72.18	35.25
1256	0.308	-0.402	-0.202		1465	197.86	78.44	35.22
1256	0.159	0.201	0.557		1468	212.07	73.44	28.38
1256	0.644	-0.952	-0.809		1468	212.15	72.82	24.38
1256	3.17	-2.33	-3.02		1475	220.12	81.13	37.56
1256	-0.428	-0.227	0.737		1475	222.73	81.14	30.21
1256	2.17	-0.474	-2.31		1475	218.86	82.93	27.09
1256	0.467	-0.35	-1.25		1475	219.53	76.95	29.77
1256	-0.737	0.629	3.47		1475	220.87	77.3	35.05
1256	2.7	-1.57	-4.51		1475	217.45	76.61	29.43
1256	0.908	0.0314	-1.47		1478	213.88	107.8	30.48
1256	0.47	-1.2	0.542		1478	208.73	113.66	29.29
1256	0.532	0.182	-0.536		1481	202.77	45.49	33.86
1259	0	0	0		1481	208.26	41.46	31.15
1259	155.89	16.14	20.68		1484	227.62	78.32	22.94
1262	0	0	0		1484	225.97	79.34	27.84
1262	59.31	150.11	25.43		1487	208.24	82.93	32.66
1344	0	0	0		1487	208.98	88.16	33.23
1344	66.65	155.81	22.22		1490	203.52	78.82	31.27
1344	1.54	0.707	-0.16		1490	205.06	81.22	33.96
1344	-0.039	-0.325	-0.551		1494	247.65	67.21	31.15
1344	-0.311	-0.111	1.39		1494	246.14	67.91	35.9
1344	1.03	-0.0918	-0.251		1494	252.22	64.85	33.94
1344	0.0665	0.0594	-1.01		1497	203.69	111.16	22.71
1344	0.175	-0.466	-0.585		1497	200.72	106.95	26.7
1344	1.17	1.17	-0.417		1500	223.69	90.54	25.57
1344	0.146	-0.152	0.837		1500	224.68	88.56	28.88
1344	-0.715	-0.361	2.27		1503	226.64	91.45	17.23
1344	0.492	0.168	2.25		1503	232.07	94.24	17.82
1344	0.617	0.674	-0.735		1507	237.78	59.33	23.96
1344	-0.698	-1.11	0.612		1507	239.08	59.19	16.21
1344	0.812	0.602	-4.48		1507	236.06	54.34	17.5
1344	-0.242	0.31	0.237		1512	243.14	73.62	35
1344	-0.391	-1.02	-0.422		1512	244.31	76.59	31.88
1344	0.459	0.917	1.08		1512	241.35	77.17	25.24
1344	0.249	-0.0251	1.74		1512	240.23	79.69	19.48
1344	0.091	-0.704	-0.705		1515	210.5	75.21	23.83
1344	0.809	1.15	-0.677		1515	208.85	76.74	28.08
1344	-0.215	-0.458	-1.55		1518	224.06	56.65	30.68
1344	-0.662	-0.481	1.1		1518	230.03	52.38	30.75
1344	0.469	-0.0165	-0.808		1523	220.63	71.85	30.32
1344	-0.307	0.625	1.76		1523	223.74	73.82	29.43
1344	0.241	0.14	-1.09		1523	222	74.78	30.19
1344	0.25	-0.0429	0.398		1523	224.6	75.96	37.01
1344	-0.139	0.0853	-0.127		1526	239.08	66.79	20.22
1344	-0.63	-0.269	0.319		1526	238.55	68.96	27.88
1344	0.424	0.159	-0.0244		1531	235.29	89.76	37.83
1344	0.0724	0.316	-0.151		1531	242.15	88.6	37.79
1344	0.288	-0.263	0.328		1531	238.3	93.34	33.28
1344	0.094	-0.532	0.447		1531	234.79	96.67	36.04
1344	-0.51	1.03	-0.12		1536	251.89	71.57	19.53
1344	0.0825	-0.147	0.421		1536	249.33	65.98	20.89
1344	-0.0652	0.106	-0.183		1536	252	71.05	18.86
1344	-0.322	0.268	-0.979		1536	251.56	66.83	21.85
1344	0.398	-0.188	0.967		1539	245.9	52.86	25.4
1344	0.055	-0.321	-0.00868		1539	251.09	54.18	30.88
1344	0.368	-0.441	0.236		1545	212	77.21	25.65
1344	0.213	0.734	-0.903		1545	209.92	77.11	32.99
1344	-0.0841	0.506	-0.104		1545	214.08	76.85	32.47
1344	-0.089	-0.724	-0.0242		1545	215.7	75.11	29.64
1344	-0.7	0.00934	0.372		1545	213.18	68.35	29.18
1344	0.441	-0.264	0.107		1548	231.83	95.52	29.74
1344	0.312	0.33	0.81		1548	235.79	102.25	30.32
1344	-0.00497	-0.307	0.108		1551	228.08	68.31	37.98
1344	0.115	0.405	-0.539		1551	222.11	67.52	34.94
1344	-0.126	-0.384	-0.145		1555	210.27	72.8	33.29
1344	-0.0722	-0.447	0.263		1555	210.62	65.52	33.11
1344	0.54	0.289	-1.41		1555	205.44	70.89	30.6
1344	0.0979	0.458	-0.406		1558	194.99	81.03	37.11
1344	0.0322	0.0538	-0.646		1558	201.34	78.56	38.85
1344	-0.23	0.257	0.459		1562	249.28	83.3	27.5
1344	-0.382	-0.876	0.426		1562	245.28	80.35	23.87
1344	0.513	0.788	-0.565		1562	248.95	80.27	27.38
1344	0.0705	-0.0541	0.95		1580	73.52	43.83	15.56
1344	0.178	0.00823	-0.12		1580	72.94	45.6	15.34
1344	-0.0911	0.333	-0.9		1580	73.1	46.68	16.41
1344	-0.227	-0.0768	0.191		1580	73.11	45.95	15.89
1344	-0.439	-0.0793	0.592		1580	72.97	46.57	16.29
1344	-0.157	0.177	-0.034		1580	72.97	46.34	13.75
1344	-0.316	-0.328	0.239		1580	73.46	45.74	15.35
1344	0.728	0.14	-0.983		1580	72.7	45.42	14.22
1344	-0.448	0.0026	0.301		1580	72.83	45.15	13.45
1344	0.0123	-0.0981	0.886		1580	72.91	45.58	13.14
1344	-0.291	-0.0976	-1.52		1580	72.82	47.15	15
1344	0.237	0.156	0.503		1580	72.5	45.99	14.8
1344	0.405	0.222	0.202		1580	72.52	46.1	13.48
1344	0.385	0.189	-1.49		1580	72.16	44.71	13.58
1344	-0.763	-0.363	-0.0373		1580	73.47	45.29	12.77
1344	0.0318	-0.0491	0.893		1580	72.65	45.53	12.07
1344	0.211	-0.0328	-1.67		1580	72.15	45.08	12.66
1344	0.166	-0.18	1.76		1586	225.23	52.81	32.5
1344	-0.271	0.589	-1.38		1586	224.21	55.75	32.91
1344	-0.265	-0.328	0.652		1586	219.06	61.77	32.42
1344	-0.0489	0.0842	-0.178		1586	217.96	56.47	37.9
1344	0.187	0.105	0.166		1586	218.58	61.29	37
1344	0.594	0.348	-0.733		1589	203.62	86.12	30.9
1350	0	0	0		1589	199.29	88.74	32.8
1350	10.52	179.29	21.92		1593	203.96	77.92	39.31
1350	0.327	-0.0478	0.236		1593	208.02	84.55	38.37
1350	-0.0543	-0.963	-1.42		1593	205.68	89.59	34.26
1350	-0.0888	1.28	2.14		1597	243.25	48.42	33.26
1357	0	0	0		1597	244.28	48.29	35.51
1357	194.15	98.26	42.01		1597	238.22	43.53	35.9
1357	-0.242	0.639	-0.371		1601	217.71	91.56	32.33
1357	0.429	-0.14	0.563		1601	221.78	86.21	32.79
1357	-0.249	0.2	-0.689		1601	227.53	86.68	33.99
1357	0.194	-0.373	1.31		1608	251.24	53.91	32.12
1360	0	0	0		1608	250.65	54.24	34.85
1360	10.08	139.31	3.49		1608	247.53	56.24	29.92
1363	0	0	0		1608	243.11	58.34	35.24
1363	45.92	178.43	18.52		1608	246.2	61.55	30.21
1366	0	0	0		1608	249.72	62.32	28.48
1366	33.73	149.26	10.13		1615	230.24	67.02	29.35
1369	0	0	0		1615	232.21	65.89	25.9
1369	235.79	31.96	13.05		1615	235.32	68.12	26.33
1373	0	0	0		1615	236.53	60.46	27.19
1373	179.43	162.93	19.58		1615	240.16	66.3	28.18
1373	2.06	-0.0667	1.93		1615	236.81	69.36	26.79
1377	0	0	0		1620	245.16	64.37	29.4
1377	47.16	178.32	13.38		1620	245.75	65.82	36.79
1392	0	0	0		1620	249.44	66.83	37.56
1392	47.81	184.31	29.41		1620	247.04	70.17	31.93
1392	0.385	-0.976	-2.1		1624	245.52	71.46	20.54
1392	-0.33	1.07	2.26		1624	247.39	76.36	23.61
1392	1.04	-0.943	-3.29		1624	246.49	74.51	19.72
1392	-0.822	0.665	2.95		1628	224.41	65.02	24.23
1392	0.791	-0.61	-1.89		1628	231.29	67.25	26.4
1392	1.21	-1.15	-1		1628	232.94	63.04	19.88
1392	-0.169	0.664	2.5		1631	214.64	80.63	27.8
1392	0.255	-1.08	-1.65		1631	219.79	78.81	22.96
1392	0.087	-0.133	-0.0865		1637	237.29	73.41	34.73
1392	0.0671	0.106	-1.31		1637	235.76	76.63	36.69
1397	0	0	0		1637	235.6	75.07	30.05
1397	88.96	225.16	44.21		1637	236.3	72.83	27.22
1397	0.357	-0.714	0.927		1637	230.47	74.03	27.08
1402	0	0	0		1641	226.62	77.6	30.31
1402	186.85	28.52	17.26		1641	223.1	79.05	25.89
1402	5.68	1.21	-1.38		1641	228.33	78.51	23.81
1405	0	0	0		1644	239.68	54.6	27
1405	184.93	214.67	23.07		1644	239.14	56.6	29.73
1409	0	0	0		1647	234	62.43	32.96
1409	192.84	99.54	40.24		1647	235.48	58.59	31.03
1409	1.54	-1.11	2.09		1650	221.05	71.11	36.17
1413	0	0	0		1650	226.25	72.58	39.25
1413	7.08	138.67	4.38		1653	249.15	86.48	28.58
1413	1.3	-0.0217	0.264		1653	246.51	90.08	32.79
1419	0	0	0		1657	218.94	89.02	28.54
1419	24.87	154.77	3.45		1657	222.36	91.68	28
1419	1.02	-0.645	1.12		1657	221.65	89.6	22.61
1422	0	0	0		1660	214.39	62.88	25
1422	33.75	148.41	9.8		1660	211.29	64.15	26.99
1425	0	0	0		1663	247.86	70.44	35.97
1425	83.98	213.11	51.61		1663	250.08	73.66	36.2
1431	0	0	0		1793	31.49	217.04	12.88
1431	180.31	216.72	0.484		1793	31.59	217.22	12.64
1431	-0.256	0.0998	0.262		1793	31.71	217.22	12.21
1431	-0.248	-0.476	-0.182		1793	31.4	216.95	12.84
1431	0.298	0.0502	1.32		1793	31.65	217.12	12.9
1439	0	0	0		1793	31.85	217.08	12.35
1439	8.18	138.64	5.19		1793	31.48	217.34	12.49
1439	-0.206	0.407	-0.761		1793	31.75	217.41	12.35
1439	-0.939	0.00945	-0.829		1793	31.37	217.05	11.54
1439	2.04	-0.842	0.06		1793	31.68	216.79	12.24
1439	-0.495	1.15	-0.771		1793	31.46	217.03	11.22
1442	0	0	0		1793	31.36	217.02	11.64
1442	193.68	98.65	41.32		1793	31.53	216.96	11.92
1446	0	0	0		1793	31.45	217.01	12.53
1446	48.51	175.51	18.35		1793	31.42	216.94	11.31
1446	-0.404	2.8	-7.29		1793	31.16	216.93	10.91
1450	0	0	0		1793	31.08	216.7	9.47
1450	167.99	205.02	2.69		1793	31.11	216.6	9.49
1450	-0.306	2.11	0.559		1793	31.24	216.42	11.05
1453	0	0	0		1793	31.23	216.69	10.59
1453	84.09	213.86	51.6		1793	31.26	216.94	10.9
1491	0	0	0		1793	31.27	216.77	10.51
1491	23.29	154.23	4.1		1793	30.96	216.6	10.19
1491	-0.741	0.164	-0.485		1793	30.89	216.66	9.82
1491	0.471	-0.279	0.486		1793	30.88	216.58	9.59
1491	-0.00261	0.426	0.805		1793	30.8	216.7	9.69
1491	0.108	-0.249	-0.729		1793	30.82	216.35	9.56
1491	-0.426	0.77	-0.574		1793	30.89	216.6	8.98
1491	-0.943	-0.462	0.025		1793	30.63	216.79	9.44
1491	0.103	-0.0765	0.182		1793	30.96	216.49	9.65
1491	0.557	-0.453	0.176		1793	30.54	216.6	9.04
1491	0.768	0.289	0.568		1793	30.63	216.57	8.98
1491	-0.14	0.825	-1.22		1793	30.62	216.21	9.27
1491	-0.403	-1.27	0.792		1793	30.62	216.16	8.16
1491	-0.032	0.889	-0.342		1793	30.42	216.61	9.17
1491	0.371	0.422	0.472		1793	30.66	216.59	8.94
1491	-0.293	0.884	-0.868		1793	30.58	216.66	9.17
1491	0.326	-1.35	0.995		1793	30.21	216.56	8.78
1491	-0.718	-0.679	0.648		1793	30.5	216.1	8.05
1491	-0.371	-0.0791	-0.847		1793	30.5	216.44	9.45
1491	0.761	0.0976	0.882		1793	30.42	216.5	9.21
1491	0.172	0.176	-0.875		1793	30.4	216.48	9.54
1491	0.226	-0.0434	0.0831		1793	30.73	216.68	9.4
1491	0.877	0.358	0.567		1793	30.62	216.56	9.66
1491	-0.964	0.439	-0.824		1793	30.53	216.44	8.44
1491	0.405	-0.62	0.156		1793	30.4	216.64	8.95
1491	-0.309	1.09	-0.296		1793	30.6	216.18	9.43
1491	0.173	-0.452	-0.647		1793	30.57	216.33	9.08
1491	-0.0969	-0.359	0.394		1793	30.59	216.57	9.34
1491	0.137	-0.362	-0.827		1793	30.54	216.85	9.58
1491	0.214	0.341	0.802		1793	30.44	216.9	10.22
1491	0.826	-0.601	0.446		1793	30.6	216.45	9.43
1491	-0.446	0.968	-0.328		1793	30.49	216.28	9.16
1491	-0.846	-1.07	-0.735		1793	30.51	216.5	7.95
1491	0.744	0.339	0.791		1793	30.45	216.36	9.42
1491	-0.501	0.218	-1.11		1793	30.42	216.52	9.55
1491	-0.458	-0.223	0		1793	30.61	216.44	9.65
1491	-0.311	-0.241	0.447		1793	30.27	216.79	9.81
1494	0	0	0		1793	30.41	216.74	9.46
1494	185.05	215.58	24.13		1793	30.44	216.41	8.59
1520	0	0	0		1793	30.51	216.23	9.07
1520	185.68	40.39	51.57		1793	30.24	216.3	9.05
1520	0.00967	-2.09	0.36		1793	30.45	216.13	9.14
1520	0.0229	0.441	0.16		1793	30.32	216.71	8.83
1520	-0.349	-2.14	1.55		1793	30.38	216.67	9.34
1520	-0.0482	-1.13	0.916		1793	30.12	216.52	9.46
1520	-0.0322	1.84	-1.15		1793	30.12	216.33	9.03
1520	0.69	-0.318	-0.438		1793	30.35	216.43	8.79
1520	0.694	-0.0114	0.44		1793	30.09	215.9	8.6
1520	-0.819	0.922	-1.03		1793	30.07	216.39	8.39
1520	0.0371	-0.897	0.613		1793	30.05	216.08	8.82
1520	0.336	0.205	0.361		1793	30.05	216.68	8.17
1520	-0.814	-1.03	-0.0904		1793	30	216.24	8.54
1520	0.257	0.526	-0.259		1793	29.9	216.52	7.91
1520	0.205	-0.298	-0.594		1793	29.7	216.29	8.23
1520	-0.119	-0.242	1.08		1793	29.78	216	7.75
1520	0.0755	0.037	-0.298		1793	29.82	216.13	7.17
1520	0.169	1.75	-0.672		1793	30.1	215.94	8.14
1520	-0.511	0.217	-0.339		1793	29.89	216.27	8.11
1520	0.362	-1.13	0.553		1793	29.84	216.33	7.95
1520	-0.319	0.224	-0.563		1793	29.99	215.84	7.68
1520	0.557	-1.19	1.24		1793	29.84	216.03	7.66
1520	-0.0408	-0.00655	-0.505		1793	29.66	215.7	6.65
1520	-0.202	1.14	-0.379		1793	29.42	216.09	7.08
1520	-0.0564	1.91	-0.502		1793	29.77	216.02	7.08
1523	0	0	0		1793	29.67	215.94	7.06
1523	141.36	41.15	10.56		1793	29.93	216.02	7.04
1528	0	0	0		1793	29.4	215.85	6.84
1528	167.77	205.3	2.75		1793	29.63	215.63	6.67
1528	-0.164	0.535	-0.317		1793	29.13	215.51	5.6
1531	0	0	0		1793	29.54	215.51	6.11
1531	57.37	34.88	13.69		1793	29.41	215.7	5.78
1534	0	0	0		1793	29.64	215.84	5.99
1534	160.24	50.52	6.92		1793	29.3	215.85	5.29
1553	0	0	0		1793	29.44	215.9	5.18
1553	209.36	81.75	42.79		1793	29.29	215.49	5.02
1553	0.67	-1.9	0.672		1793	29	215.59	4.39
1553	-0.0942	-0.0807	0.342		1793	28.95	215.53	3.8
1553	-0.984	2.77	-1.97		1793	29.08	215.56	4.5
1553	1.15	-3.18	2.13		1793	28.98	215.4	4.11
1553	0.456	0.841	-0.489		1793	29.42	215.59	4.65
1553	-0.725	0.352	-1.5		1793	29	215.78	4.1
1553	0.508	-0.377	1.54		1793	29.05	215.39	3.35
1553	-0.0655	0.101	-1.13		1793	28.87	215.23	3.29
1553	0.635	-1.27	1.24		1793	28.96	215.1	3.32
1553	0.258	0.69	-0.6		1793	29.02	215.15	3.02
1553	1.35	-2.09	2.5		1793	28.86	215.06	2.6
1553	0.0685	0.623	-3.14		1793	28.56	215.63	2.82
1553	-0.102	0.0413	1.25		1793	28.8	215.29	2.6
1553	0.538	-0.881	1.03		1793	28.77	215.33	2.13
1553	-0.689	0.403	-1.58		1793	28.44	215.03	2.19
1557	0	0	0		1793	28.49	214.66	1.84
1557	96	231.45	47.22		1793	28.65	214.75	2.38
1557	-0.14	-1.47	-0.00538		1793	28.4	214.98	2.08
1560	0	0	0		1793	28.46	214.97	1.66
1560	166.38	208.68	2.6		1793	28.66	214.99	1.44
1566	0	0	0		1793	28.5	215.18	1.53
1566	169.44	182.92	19.56		1793	28.38	214.75	1.39
1566	-0.16	-0.71	1.33		1793	28.7	214.68	0.929
1566	-0.0028	-0.594	-0.885		1793	28.58	214.22	1.23
1566	-0.0687	0.505	-0.143		1793	28.4	214.28	1.34
1576	0	0	0		1793	28.24	214.89	1.2
1576	46.02	185.05	29.57		1793	28.44	214.82	1.35
1576	2.82	-3.23	2.31		1793	28.13	215.04	0.67
1576	0.912	0.494	-1.97		1793	28.43	214.78	0.606
1576	2.07	-2.04	-0.826		1793	28.45	214.45	0.714
1576	-0.11	0.324	1.07		1793	29.44	214.28	0.574
1576	-0.92	1.26	-0.816		1793	27.68	214.82	0.313
1576	0.504	-0.703	1.35		1793	28.24	214.4	0.656
1576	0.899	-0.9	-4.6		1797	228.09	60.62	20.63
1640	0	0	0		1797	231.63	57.46	23.92
1640	169.7	180.27	21.35		1797	234.28	51.98	18.94
1640	0.276	-1.05	0.995		1800	225.03	63.84	30.63
1640	-0.72	-0.476	1.15		1800	227.49	64.63	34.08
1640	0.276	0.274	-0.981		1803	240.83	65.41	36.77
1640	0.315	-0.195	1.06		1803	237.89	64.85	40.32
1640	-0.154	-0.274	0.306		1806	215.48	71.11	33.06
1640	-0.157	-0.277	0.00921		1806	214.26	70.88	36.21
1640	-0.263	-1.62	2.46		1809	244.37	85.68	37.22
1640	-0.284	-0.175	-0.104		1809	243.45	87.16	35.64
1640	0.377	0.372	-0.176		1816	244.56	72.32	31.32
1640	-0.0733	-0.656	0.174		1816	245.65	67.31	26.68
1640	-0.397	-1.23	1.45		1816	248.2	62.69	23.85
1640	0.00683	2.56	-2.21		1816	251.98	60.24	26.67
1640	0.351	-0.89	0.0976		1816	245.37	63.08	28.81
1640	-0.116	0.902	-0.144		1816	251.36	61.17	29.41
1640	0.0536	0.367	0.0193		1819	205.5	81.35	27.19
1640	-0.121	-3.41	3.47		1819	202.7	79.27	32.09
1640	0.319	2.56	-3.32		1824	251.82	60.43	28.65
1640	0.138	-0.13	0.886		1824	248.87	58.68	31.94
1640	0.163	0.657	-0.0235		1824	241.75	58.6	32.37
1640	0.0292	-2.74	2.05		1824	242.17	59.43	39.1
1640	0.545	1.22	-1.4		1827	217.95	73.89	26.9
1640	0.181	-1.18	1.61		1827	219.84	73.7	26.57
1640	1.58	-2.15	2.16		1830	247.98	47.56	25
1640	1.21	-3.25	2.96		1830	243.77	42.07	24.94
1640	0.743	-0.247	-0.541		1835	231.8	107.39	30.87
1640	-0.0749	-0.0547	0.285		1835	234.49	101.79	34.04
1640	-0.981	1.33	-0.411		1835	233.72	104.11	32.05
1640	-0.866	3.52	-4.17		1835	229.29	103.32	33.68
1640	1.65	-3.81	4.8		1838	219.69	72.52	32
1640	-0.0617	0.391	0.959		1838	222.48	75.09	38.91
1640	-0.212	0.0866	0.222		1841	240.78	76.94	34.93
1640	-0.128	0.134	0.226		1841	240.55	80.6	32.42
1640	0.892	-2.69	4.28		1844	228.33	84.58	16.33
1640	-0.587	2.23	-2.75		1844	228.4	82.12	9.35
1640	-0.519	0.451	-0.982		1847	247.02	52.33	13.12
1640	0.63	0.00711	0.693		1847	249.12	55.17	20
1640	0.178	0.171	0.445		1851	227.05	61.8	23.71
1640	0.861	0.547	0.766		1851	220.29	64.4	25.62
1640	0.565	-0.448	1.21		1851	226.01	65.7	25.32
1640	-0.3	-0.0721	0.0188		1857	220.4	68.34	29.63
1640	0.116	-0.163	-0.381		1857	217.95	72.43	28.18
1640	-0.0408	0.152	0.402		1857	214.16	73.6	34.9
1640	1.7	-1.79	3.85		1857	210.09	69.26	34.52
1640	0.537	0.0324	0.181		1857	207.31	75.88	34.1
1640	2.62	-1.85	4.87		1861	205	81.53	33.42
1640	0.644	-0.367	1.04		1861	203.79	80.46	34.13
1640	-0.28	-0.0777	-0.942		1861	200.54	73.77	31.99
1640	-0.122	0.223	-0.3		1864	220.99	99.9	32.57
1640	0.0445	0.274	0.458		1864	221.77	95.3	29.02
1640	-0.333	-0.23	-1.28		1867	238.38	52.59	31.22
1640	1.73	-2.67	5.12		1867	240.93	53.01	29.78
1640	2.46	-2.56	6.42		1872	240.64	54.4	28
1640	-0.237	-0.152	0.564		1872	243.61	61.04	26.96
1640	0.356	-0.649	0.43		1872	242.22	64.25	32.31
1640	-0.672	0.463	-1.39		1872	243.41	71.19	34.64
1640	-0.159	-0.207	-0.0798		1877	237.49	74.98	24.29
1643	0	0	0		1877	233.94	74.4	30.39
1643	181	216.26	0.658		1877	228.15	74.77	32.01
1706	0	0	0		1877	229.95	74.45	27.6
1706	186.8	112.64	24.87		1880	229.25	79.43	32.73
1706	0.931	-0.352	-0.36		1880	231.48	78.96	32.89
1706	0.251	-0.073	-0.565		1883	235.44	66.57	18.13
1706	-0.552	0.245	0.16		1883	239.02	68.82	15.22
1706	0.0707	0.296	0.643		1888	237.17	71.11	28.03
1706	0.402	-0.722	-0.729		1888	239.82	75.34	32.02
1706	0.163	0.0521	1.87		1888	237.36	78.48	30.83
1706	0.243	0.109	-1.46		1888	238.09	80.02	32.29
1706	0.135	0.0668	0.139		1891	239.75	45.26	24.2
1706	0.256	-0.424	1.25		1891	235.64	47.49	22.79
1706	0.00316	0.197	-0.724		1896	236.02	75.47	29.74
1706	-0.183	-0.304	0.777		1896	237.59	83.03	29.87
1706	-0.793	0.533	-1.18		1896	233.21	86.8	31.51
1706	-0.729	0.173	0.886		1896	229.33	91.47	27.96
1706	0.411	-0.875	-0.108		1902	246.21	93.56	28.38
1706	-0.224	0.279	1.44		1902	241.58	93.22	26.12
1706	0.171	0.0641	-0.789		1902	237.66	89.42	23.36
1706	0.216	-0.383	-0.893		1902	237.51	89.41	24.56
1706	0.0879	0.324	-0.158		1902	238.44	91.32	23.75
1706	0.639	-0.273	1.29		1908	249.87	66.45	32.62
1706	0.755	0.256	1.59		1908	249.9	64.67	38.7
1706	-0.37	0.158	-0.67		1908	251.03	62.74	34.53
1706	-0.329	-0.0819	0.867		1908	249.31	67.66	36.56
1706	0.11	-0.157	-1.02		1908	247.56	65.79	40.92
1706	0.107	-0.0433	0.469		1914	228.09	104.88	35.7
1706	-0.0286	0.135	0.663		1914	227.35	103.99	38.96
1706	-0.769	-0.0156	-0.738		1914	223.9	100.56	36.59
1706	0.215	-0.143	-0.474		1914	228.68	102.92	33.63
1706	0.522	0.507	-0.585		1914	230.58	103.27	30.06
1706	-0.606	-0.523	0.343		1918	224.39	60.81	33.49
1706	0.622	0.0386	1.03		1918	227.29	54.01	33.83
1706	0.57	0.292	0.0177		1918	227.4	51.02	37.74
1706	-0.544	0.122	-0.237		1921	210.63	67.99	34.45
1706	-0.168	-0.223	0.407		1921	206.65	68.63	37.8
1706	0.0332	0.14	-0.66		1924	214.55	60.07	37.5
1706	-0.257	0.37	0.0436		1924	218.26	60.04	31.6
1706	-0.0896	-0.328	0.0103		1927	203.11	49.75	31.96
1706	1.88	0.554	0.249		1927	209.13	46.62	35.31
1706	-0.158	-0.268	-1.81		1930	240.59	60.33	32.52
1706	0.17	0.13	0.865		1930	243.55	60.34	34.53
1706	-0.477	-0.4	-0.267		1933	228.86	69.24	22.75
1706	0.323	0.306	0.143		1933	229.71	66.51	26.18
1706	2.92	0.787	0.198		1936	219.5	94.21	31.98
1706	-0.111	0.197	-0.642		1936	219.13	98.91	35.12
1706	0.107	-0.503	0.474		1940	232.51	58.62	26.69
1706	-0.306	0.265	-0.638		1940	234.33	62.49	27.97
1706	0.0413	-0.0197	0.677		1940	232.72	58.57	28.06
1706	0.276	0.19	0.174		1944	220.28	65.04	19.55
1706	-0.15	0.108	-0.328		1944	225.39	63.58	21.83
1706	-0.535	-0.202	-0.413		1944	227.01	64.31	21.88
1706	0.334	0.183	0.0572		1947	238.74	49.32	35.7
1706	-0.569	-0.352	-1.27		1947	236.19	50.72	31
1706	-0.319	-0.128	-0.713		1950	242.5	89.86	34.93
1706	1.14	0.279	1.79		1950	245.73	87.48	32.87
1706	2.08	0.755	1.39		1953	250.53	84.48	27.5
1706	0.764	0.169	0.647		1953	251.35	87.48	32.31
1706	0.0146	-0.339	-1.1		1956	208.45	76.71	31.35
1710	0	0	0		1956	208.9	80.5	37.78
1710	169.35	129.99	28.92		1963	240.4	70.77	24.44
1710	0.965	0.424	-1.04		1963	238.5	73.61	27.34
1713	0	0	0		1963	239.21	72.64	33.81
1713	169.64	38.53	17.21		1963	239.95	71.68	34.61
1719	0	0	0		1963	243.39	73.94	32.11
1719	251.49	146.7	26.76		1963	240.39	79.03	37.42
1719	-0.158	0.391	0.6		1966	230.68	66.62	15.52
1719	-0.0356	-0.0623	-0.242		1966	234.51	65.24	15.14
1719	0.000333	-0.168	0.459		1969	234.27	71.35	17.63
1732	0	0	0		1969	232.31	69.58	13.91
1732	166.55	207.13	4.79		2033	75.55	47.25	27.77
1732	0.13	1.09	-0.289		2033	75.43	48.14	25.53
1732	0.0923	0.102	0.153		2033	75.32	47.07	28.38
1732	-0.2	-0.995	-0.17		2033	75.65	48.13	26.64
1732	0.305	-0.0787	-0.619		2033	74.83	47.56	29.13
1732	0.606	-1.03	-0.0429		2033	75.28	47.44	27.93
1732	0.0429	0.335	-0.696		2033	74.96	47.49	27.12
1732	-0.366	0.552	0.37		2033	74.93	47.6	27.58
1732	0.0928	0.596	-0.35		2033	75.26	48.57	28.09
1732	-0.301	0.671	-0.418		2033	75.42	47.34	27.39
1732	0.498	-0.0158	0.778		2033	75.03	47.58	25.67
1737	0	0	0		2033	75.49	47.26	27.38
1737	182.99	24.38	17.42		2033	75.97	47.75	26.93
1737	1.67	1.15	-1.77		2033	74.89	47.76	25.23
1740	0	0	0		2033	75.52	48.09	27.16
1740	46.18	185.09	30.28		2033	75.09	47.34	26.36
1760	0	0	0		2033	74.87	47.85	25.37
1760	6.35	139.1	4.33		2033	74.76	47.81	25.96
1760	0.616	0.358	0.33		2033	74.94	48.06	27.63
1760	-0.732	0.0152	-0.551		2033	75.84	47.28	27.9
1760	0.447	0.201	0.579		2033	75.41	46.89	23.91
1760	0.303	-0.289	-0.0323		2033	74.92	46.87	24.51
1760	0.226	-0.167	0.0478		2033	75.05	48.09	23.82
1760	1.41	-0.344	1.05		2033	74.89	46.89	25.44
1760	-0.0131	0.288	-0.907		2033	74.44	47.02	26.6
1760	-0.172	-0.428	-0.031		2033	74.83	47.86	23.82
1760	0.0308	-0.435	0.95		2033	75	47.82	24.63
1760	2.64	-2.33	-0.398		2033	74.8	46.71	24.33
1760	1.69	-0.513	0.713		2033	74.21	47.14	25.1
1760	0.561	-0.18	-0.067		2033	74.86	47.07	26.1
1760	0.0438	0.088	-0.0509		2033	74.65	46.95	24.68
1760	-0.00268	0.19	-0.236		2033	74.06	46.63	25.61
1820	0	0	0		2033	74.55	47.28	23.25
1820	183.67	175.28	1.59		2033	73.97	46.45	23.25
1820	0.436	0.15	0.214		2033	74.47	47.14	22.87
1820	0.0625	-0.154	-0.362		2033	74.07	46.14	23.05
1820	0.246	0.353	0.136		2033	74.17	46.59	23.06
1820	-0.0273	-1.42	0.0343		2033	73.59	46.68	24.4
1820	-0.0577	0.242	-0.135		2033	73.64	46.64	23.61
1820	-0.0683	0.197	0.107		2033	74.45	47.13	23.28
1820	-0.0458	-0.276	0.12		2033	73.98	47.1	22.98
1820	0.0188	0.0972	-0.102		2033	73.72	47.27	21.47
1820	-0.0216	-0.114	-0.0459		2033	74.02	46.24	22.59
1820	0.244	-0.212	-0.0447		2033	73.54	46.66	21.7
1820	-0.126	-0.0827	-0.165		2033	73.13	47.68	22.8
1820	0.161	-0.376	-0.153		2033	73.92	46.81	22.02
1820	0.412	0.279	0.203		2033	74.26	46.63	20.92
1820	-0.0104	-0.228	-0.069		2033	72.53	46.93	22.17
1820	0.257	0.167	0.159		2033	73.67	46.74	22.61
1820	-0.0371	-0.145	-0.0567		2033	73.79	46.2	20.58
1820	-0.00645	-0.229	-0.0832		2033	73.59	46.8	20.83
1820	-0.0397	0.486	-0.194		2033	74.08	45.68	19.83
1820	0.127	-0.203	0.41		2033	73.38	46.05	18.28
1820	0.487	-0.408	-0.211		2033	74.34	46.48	19.43
1820	-0.157	0.0569	0.255		2033	73.28	47.69	17.64
1820	0.239	0.0639	-0.0258		2033	73.46	45.26	18.7
1820	0.0275	-0.247	-0.04		2033	73.18	45.76	19.67
1820	0.0197	-0.641	-0.135		2033	72.8	45.32	18.41
1820	-0.124	-0.0553	-0.196		2033	73.34	45.65	17.54
1820	0.304	0.0876	0.183		2033	73.74	45.45	17.96
1820	0.0403	-0.0179	0.0981		2033	73.75	46.19	18.86
1820	-0.434	-0.42	0.00559		2033	72.88	45.54	17.23
1820	0.103	0.11	-0.182		2033	72.92	46.72	18.69
1820	-0.114	0.0408	0.147		2037	167.5	4.77	26.41
1820	-0.284	-0.185	0.241		2037	167.4	5.21	23.31
1820	0.0264	-0.0459	-0.314		2037	165.5	3.84	20.66
1820	0.0323	0.00668	-0.0672		2042	224.96	69.28	33.59
1820	0.362	0.196	-0.211		2042	228.96	73.34	38.64
1820	-0.539	-0.44	0.675		2042	231.04	76.09	36.53
1820	0.273	0.165	-0.296		2042	229.93	73.41	30.16
1820	0.0931	-0.211	-0.254		2045	241.61	85.95	26.69
1820	-0.309	0.312	0.0566		2045	241.78	80.24	28.67
1820	-0.201	-0.385	-0.188		2049	225.31	64.2	27.68
1820	0.0465	0.169	0.192		2049	222.42	60.15	27.22
1820	-0.0334	-0.278	-0.0533		2049	223.62	63.63	33.52
1820	0.195	0.242	0.0209		2052	232.16	58.67	34.52
1820	0.0166	0.0359	0.394		2052	226.84	62.48	37.74
1820	-0.264	-0.748	-0.221		2056	237.58	103.86	33.17
1820	0.247	0.175	-0.0421		2056	237.11	97.03	30.37
1820	-0.0318	0.155	-0.02		2056	232.65	92.87	34.61
1820	0.0164	-0.0774	0.0041		2060	226.5	82.48	31.21
1820	0.0481	0.304	0.248		2060	220.55	85.26	31.94
1820	-0.0911	-0.235	-0.271		2060	226.35	84.42	31.82
1820	-0.312	0.215	-0.148		2064	243.79	76.66	33.44
1820	0.221	-0.43	0.213		2064	245.77	77.88	34.89
1820	-0.239	0.16	-0.234		2064	251.27	74.13	37.85
1820	0.166	-0.0404	-0.0435		2068	226.41	87.86	19.77
1820	-0.335	-0.0949	0.0378		2068	226.45	84.81	24.84
1820	0.182	0.36	-0.174		2068	225.23	86.14	18.62
1820	-0.0184	-0.321	0.169		2071	229.71	89.04	26.39
1820	0.271	0.149	-0.133		2071	228.88	89.48	21.75
1823	0	0	0		2074	239.27	59.5	28.73
1823	156.59	51.6	8.15		2074	242.04	57.91	35.56
1834	0	0	0		2078	235.51	61.23	36.89
1834	1.27	212.19	9.83		2078	235.44	68.38	38.13
1834	-0.523	-3.72	0.702		2078	235.33	67.96	33.14
1834	-0.0433	0.0691	-1.01		2081	201.54	63.51	30.92
1834	0.25	-0.239	2.25		2081	200.65	66.44	36.95
1834	0.0312	-0.454	-1.88		2084	230.83	81.31	34.51
1834	-0.0552	0.0896	0.588		2084	235.17	77.47	32.66
1834	0.309	-0.222	0.725		2087	210.45	69.34	29.2
1834	-0.118	0.191	0.276		2087	210.8	62.63	28.11
1834	1.04	0.888	-0.0637		2093	232.96	56.82	31.99
1837	0	0	0		2093	232.9	53.7	32.48
1837	225.54	13.99	18.53		2093	233.25	52.91	39.09
1840	0	0	0		2093	235.96	56.39	34.64
1840	221.43	21.19	16.06		2093	238.76	51.96	29.68
1844	0	0	0		2096	216.53	81.05	21.72
1844	192.64	187.54	15.81		2096	221.42	78.86	19.51
1844	2	-1.71	-0.288		2099	215.29	84.96	30.96
1847	0	0	0		2099	213.94	81.67	29.22
1847	246.55	28.18	11.13		2104	231.35	64.98	38.94
1850	0	0	0		2104	229.94	68.28	34.87
1850	130.83	28.18	16.74		2104	230.7	64.89	36.92
1856	0	0	0		2104	228.79	70.38	34.31
1856	193.58	99.19	40.91		2107	249.56	53	34.68
1856	0.393	-0.384	1.24		2107	246.36	54.94	33.86
1856	-0.355	-0.21	-0.877		2110	233.41	73.4	35.42
1856	0.157	-0.148	-0.149		2110	234.2	76.36	36.23
1859	0	0	0		2115	223.77	80.38	27.6
1859	28.3	181.75	43.82		2115	227.26	83.36	28.37
1862	0	0	0		2115	229.07	87.28	29.38
1862	222.18	4.62	21.15		2115	234.64	84.78	27.53
1865	0	0	0		2119	220.44	83.41	36.31
1865	195.68	23.78	16.61		2119	222.28	78.87	33.9
1870	0	0	0		2119	222.77	77.39	35.08
1870	50.86	180.92	27.46		2122	196.12	106.05	34.44
1870	0.736	-0.612	-0.551		2122	196.62	105.02	40.08
1870	0.193	0.0761	-1.15		2126	214.79	76.8	33.61
1873	0	0	0		2126	213.08	83.27	33.46
1873	221.78	130.82	6.77		2126	218.17	83.76	34.9
1876	0	0	0		2129	236.65	80.97	31.8
1876	95.39	212.57	10.96		2129	240.66	84.78	30.69
1883	0	0	0		2132	235.1	76.23	26.27
1883	168.65	182.13	19.45		2132	235.49	77.1	30.34
1883	0.03	0.192	1.16		2135	226.95	76.08	29.71
1883	-0.473	-0.485	1.16		2135	228.99	78.3	33.41
1883	0.466	0.297	-1.47		2140	233.23	72.99	28.49
1883	0.528	0.519	-1.4		2140	232.2	70.82	30.28
1886	0	0	0		2140	232.4	67.2	28.58
1886	87.23	67.8	5.48		2140	237.91	63.71	24.94
1889	0	0	0		2143	66.12	38.6	32.53
1889	75.09	35.27	14.34		2143	67.04	39.19	30.3
1893	0	0	0		2146	213.98	61.16	34.21
1893	34.89	149.44	10.06		2146	215.12	55.74	38.87
1893	-0.477	-0.652	1.36		2149	214.18	65.17	37.72
1896	0	0	0		2149	213.46	64.98	31.62
1896	27.2	182.46	44.11		2155	237.75	82.96	36.75
1906	0	0	0		2155	235.97	84.16	34.81
1906	181.11	217.16	0.309		2155	236.01	85.86	34.28
1906	-0.0409	-0.302	1.12		2155	237.71	89.04	32.9
1906	0.617	0.175	-0.555		2155	234.37	84.65	34.36
1906	-0.223	-0.724	-0.5		2158	248.87	88.42	28.98
1906	0.847	0.525	0.238		2158	251.23	92.87	34.7
1906	-0.951	0.0638	-0.101		2161	235.64	66.54	25.36
1906	0.12	-1.04	0.594		2161	237.44	69.28	18.18
1906	0.484	1.29	-0.323		2164	208.51	70.34	32.62
1909	0	0	0		2164	208.96	74.93	26.81
1909	47.89	184.01	31.65		2167	232.26	106.79	34.23
1912	0	0	0		2167	238.84	103.34	34.49
1912	85.53	46.62	13.25		2171	230.44	54.98	27.18
1918	0	0	0		2171	236.18	56.06	31.6
1918	103.24	213.32	12.72		2171	238.29	57.32	34.02
1918	-0.332	-0.134	1.54		2174	221.23	65.19	31.3
1918	-0.132	0.0669	-1.55		2174	224.97	60.81	36.23
1918	0.0601	-0.0731	-0.776		2181	230.09	79.58	31.46
1923	0	0	0		2181	230.81	77.26	32.07
1923	92.64	213.13	13.1		2181	226.05	80.84	33.46
1937	0	0	0		2181	228.18	85.27	28.77
1937	192.98	188.23	18.16		2181	231.69	83.48	34.58
1937	0.656	-0.376	-1.03		2181	234.46	79.94	39.32
1937	1.45	-2.07	-1.56		2184	218.43	77.1	25.21
1937	1.64	-1.41	-2.59		2184	217.71	76.05	32.21
1937	-0.974	0.895	0.31		2187	216.98	69.04	35.22
1937	0.818	-0.801	0.202		2187	217.32	64.68	36.31
1937	0.0253	-0.165	-0.489		2193	243.29	66.79	41.22
1937	-0.069	0.237	0.108		2193	239.91	71.65	39.08
1937	1.4	-0.71	-0.637		2193	246.13	70.15	39.22
1940	0	0	0		2193	248.83	64.35	36.06
1940	60.09	24.86	21.82		2193	251.42	63.45	31.64
1945	0	0	0		2196	223.59	76.03	28.59
1945	250.84	146.2	28.68		2196	217.98	73.9	32.16
1945	0.122	0.0246	-1.11		2203	240.02	64.7	33.63
1945	0.135	-0.201	0.519		2203	243.12	67.06	30.89
1948	0	0	0		2203	237	66.34	34.61
1948	175.63	10.48	20		2203	234.51	65.14	27.97
1951	0	0	0		2203	229.64	64.08	28.46
1951	180.69	28.77	15.89		2203	235.53	60.19	28.33
1958	0	0	0		2207	219.17	84.67	35.08
1958	76.68	191.91	1.28		2207	218.02	87.59	33.36
1958	1.03	1.61	-0.685		2207	219.62	85.42	35.28
1958	0.072	-2.75	0.0135		2212	224.43	62.22	31.93
1958	-0.977	2.21	0.0407		2212	228.81	67.01	28.96
1958	0.908	1.2	-0.167		2212	224.99	65.34	27.5
1977	0	0	0		2212	223.22	69.79	26.95
1977	95.41	209.98	11.14		2217	235.43	77.56	32.99
1977	0.0629	0.238	-0.212		2217	239.58	76.36	28.86
1977	-0.676	-0.871	0.238		2217	237.91	79.15	29.44
1977	-0.151	0.187	-0.51		2217	239.03	83.92	28.18
1977	0.4	-0.0462	0.647		2220	237.11	93.56	32.5
1977	0.307	0.146	-0.397		2220	231.54	93.31	31.95
1977	0.404	0.699	-0.0354		2225	228.42	65.82	30.17
1977	-0.471	1.96	0.487		2225	234.59	70.45	30.49
1977	4.3	-0.313	-0.0488		2225	232.4	72.38	27.78
1977	3.33	-0.0369	0.173		2225	235.12	72.73	23.41
1977	4.77	-0.00239	1.12		2230	216.04	77.76	37.38
1977	-0.413	-0.692	-0.341		2230	215.01	77.8	37.5
1977	0.892	0.294	0.055		2230	209.37	81.46	33.47
1980	0	0	0		2230	211.52	83.51	34.46
1980	48.68	178.49	10.52		2234	225.34	82.55	33.06
2009	0	0	0		2234	220.96	76.73	32.32
2009	250.34	249.08	22.59		2234	226.08	75.31	31.87
2009	0.0746	0.258	-2.3		2239	215.3	81.64	28.82
2009	0.174	-0.0224	1.43		2239	220.94	83.2	31.72
2009	-0.256	0.00792	-1.25		2239	214.81	78.82	32.83
2009	0.178	0.135	1.81		2239	213.31	80.05	37.39
2009	0.109	0.0114	-0.08		2242	232.6	58.02	32.46
2009	0.674	-0.467	1.62		2242	234.04	61.11	30.68
2009	0.598	-0.456	0.869		2246	244.68	82.73	29.41
2009	-0.0919	0.0778	0.119		2246	241.66	79.9	35.18
2009	0.156	-0.785	0.731		2246	242.27	81.49	36.49
2009	0.0654	-0.365	1.77		2250	242.87	68.84	34.21
2009	-0.182	-0.495	1.11		2250	244.26	61.59	34.25
2009	0.29	0.615	0.567		2250	242.75	59.67	31.57
2009	0.217	-0.215	0.408		2253	252.01	51.69	21.07
2009	-0.0551	0.443	2.03		2253	250.76	50.56	19.67
2009	-0.18	0.643	2.05		2256	233.62	82.28	29.86
2009	-0.0721	0.373	-0.0275		2256	232.16	83.42	23.88
2009	-0.0189	-0.504	0.284		2259	242.02	54.76	27.25
2009	0.104	0.725	0.753		2259	241.21	56.82	29.29
2009	0.398	-0.166	-0.0182		2262	250.88	75.38	26.62
2009	-0.625	0.156	-0.748		2262	249.75	71.46	31.56
2009	0.132	0.408	-0.0536		2265	247.54	74.66	33.55
2009	0.0137	-0.544	0.152		2265	251.7	75.37	36.62
2009	0.486	-0.249	-0.235		2268	242.43	83.74	40.9
2009	-0.268	-0.0051	1.78		2268	238.96	86.21	35.89
2009	-0.0614	0.0771	1.72		2271	218.36	77.32	35.37
2009	0.513	-0.253	-0.932		2271	215.81	77.19	37.22
2016	0	0	0		2275	196.2	72.79	27.61
2016	49.66	180.01	28.77		2275	202.57	73.03	27.87
2016	1.13	0.115	0.0308		2275	203.42	79.54	31.79
2016	0.464	0.0196	-1.56		2278	218.25	64.29	31.47
2016	0.454	0.0195	0.1		2278	219.79	61.09	33.28
2016	-0.357	0.374	-0.608		2281	229.65	88.85	23.2
2019	0	0	0		2281	228.51	81.67	22.48
2019	165.8	208.42	4.34		2285	233.96	61.17	36.03
2049	0	0	0		2285	235.36	55.66	32.37
2049	247.33	144.2	30		2285	238.62	56.46	35.05
2049	0.0334	0.456	0.235		2288	233.06	75	19.47
2049	0.914	0.349	0.152		2288	237.82	77.99	19.06
2049	0.787	-0.871	-1.63		2292	207.52	77.45	26.07
2049	0.613	0.721	1.4		2292	206.65	80.53	32.61
2049	0.714	-0.326	-0.686		2292	200.94	79.71	34.75
2049	-0.384	-0.653	0.167		2295	207.44	88.32	27.99
2049	0.29	-0.159	-0.375		2295	210.47	89.42	27.24
2049	-0.609	-0.468	-0.126		2298	224.22	77.13	36.25
2049	-0.84	-0.359	0.418		2298	219.07	79.99	37.19
2049	0.529	0.131	-0.856		2301	225.85	79.77	33.47
2049	-0.643	-1.36	0.129		2301	225.23	77.23	35.06
2049	1.4	0.455	-0.651		2304	207.98	66.51	37.69
2049	0.196	0.481	0.104		2304	211.44	62.24	34.28
2049	0.333	-0.314	-0.146		2309	234.94	70.41	31.44
2049	0.647	0.636	-0.239		2309	239.6	69.54	27.65
2049	0.149	-0.6	-0.0583		2309	238.76	63.93	24.95
2049	-0.284	-0.122	-0.309		2309	239.66	58.46	20
2049	0.755	0.107	-0.652		2312	242.61	50.39	33.65
2049	0.0569	-0.131	0.107		2312	247.55	49.81	34.22
2049	-0.604	0.427	0.969		2315	250.6	92.8	30.32
2049	0.198	-0.256	-1.11		2315	243.42	90.91	29.92
2049	-0.023	-0.163	0.00368		2320	243.04	78.73	32.87
2049	0.0997	0.0254	-0.203		2320	243.98	72.11	36.17
2049	0.26	-0.146	-0.0865		2320	241.88	75.46	29.62
2049	0.254	0.381	0.481		2320	235.19	76.78	27.65
2049	0.295	-0.0936	-1.25		2323	240.54	65.8	35.06
2054	0	0	0		2323	238.69	66.5	34.16
2054	106.37	249.07	41.99		2327	219.58	76.48	33.64
2054	-0.194	0.311	0.215		2327	221.01	80.67	36.92
2054	-0.0384	-0.0644	-0.282		2327	219.67	78.69	38.64
2058	0	0	0		2330	245.33	62.59	32.94
2058	191.47	100.48	40.44		2330	248.46	63.57	34.68
2058	-0.129	0.918	-0.195		2335	143	18.33	3.03
2061	0	0	0		2335	143.04	17.9	1.41
2061	163.77	43.08	14.61		2335	141.91	19.22	1.23
2064	0	0	0		2335	143.13	18.39	2.22
2064	23.38	47.36	11.69		2338	232.81	63.58	29.22
2068	0	0	0		2338	232.87	59.32	27.37
2068	188.36	8.96	21.48		2341	226.18	94.16	32.17
2068	2.41	2.65	-0.852		2341	231.34	91.5	36.02
2071	0	0	0		2344	212.92	78.79	23.56
2071	170.38	6.81	23.25		2344	213.56	78.65	19.94
2110	0	0	0		2347	225.54	72.7	38.28
2110	185.56	37.84	52.61		2347	229.47	75.29	32.54
2110	0.707	-2.15	1.7		2350	232.42	62.78	26.34
2110	0.194	-0.18	-1.48		2350	229.79	60.22	26.25
2110	-0.689	1.9	0.671		2435	159.65	60.01	32.8
2110	-0.163	-0.329	-0.0556		2435	158.55	59.45	32.77
2110	0.656	-0.695	0.0921		2435	159.03	59.31	32.91
2110	0.0404	0.534	-0.138		2435	159.56	59.07	34.07
2110	-0.568	0.436	-1.2		2435	160.29	59.37	31.99
2110	-0.0528	-1.15	1.16		2435	158.54	59.58	32.6
2110	0.545	0.357	-0.452		2435	159.47	59.13	34.22
2110	-0.142	0.747	0.653		2435	156.98	59.57	33.28
2110	-0.0607	0.508	-0.895		2435	158.36	59.47	32.61
2110	-0.347	-0.247	0.317		2435	158.47	59.22	32.54
2110	-0.154	0.15	0.0433		2435	158.25	59.43	32.21
2110	0.137	-0.966	-0.171		2435	160.07	59.17	32.34
2110	0.319	0.918	0.0899		2435	158.2	59.23	31.83
2110	-0.226	0.159	0.147		2435	158.61	59.39	32.24
2110	-0.132	-0.171	0.344		2435	158.62	59.33	30.67
2110	0.196	-0.99	-0.364		2435	156.69	59.4	31.91
2110	-0.119	0.459	0.449		2435	156.3	59.25	31.37
2110	0.0405	-0.826	0.619		2435	157.95	59.06	31.35
2110	0.353	0.708	-0.503		2435	158.15	59.26	31.58
2110	-0.197	0.182	-0.382		2435	159.73	58.68	31.09
2110	0.174	0.949	-0.83		2435	157.24	59.35	30.75
2110	-0.0965	-1.09	0.537		2435	158.62	59.69	30.97
2110	-0.309	-0.618	0.527		2435	157.84	58.83	31.3
2110	0.287	1.55	-1.15		2435	157.33	58.84	30.78
2110	-0.498	-0.128	0.673		2435	157.81	58.85	30.56
2110	0.155	-1.23	0.767		2435	157.99	58.65	28.86
2110	0.211	0.807	-0.994		2435	157.35	58.95	29.37
2110	-0.0815	-0.405	0.664		2435	157.91	59.27	31.7
2110	0.474	0.222	-0.403		2435	159.95	58.18	28.84
2110	-0.503	-1.33	1		2435	157.99	58.71	30.41
2110	0.183	0.622	-0.743		2435	158.23	58.91	29.56
2110	-0.0817	-1.04	0.458		2435	157.23	58.37	29.77
2110	0.341	0.986	0.116		2435	156.5	59.14	30.25
2110	-0.0575	-1.11	-0.452		2435	157.16	58.55	30.44
2118	0	0	0		2435	157.07	58.98	30.69
2118	165.9	209.18	5.41		2435	158.31	58.98	29.39
2118	0.931	-1.77	0.202		2435	157.21	58.69	30.7
2118	-0.648	1.26	-0.905		2435	157.55	58.47	29.27
2118	-0.319	-0.279	-0.203		2435	157.25	58.54	28.9
2118	0.538	0.108	-0.147		2435	157.15	58.86	30.54
2118	0.64	-0.902	1.3		2435	156.67	59.13	29.5
2121	0	0	0		2435	157.15	58.97	30.64
2121	180.58	217.34	0.313		2435	157.07	58.91	30.29
2124	0	0	0		2435	154.23	59.89	28.97
2124	34.35	149.52	11.27		2435	156.58	58.75	31.47
2141	0	0	0		2435	155.76	58.84	30.47
2141	25.32	184.82	21.24		2435	157.06	58.96	29.98
2141	-0.445	-1.52	1.89		2435	157.07	59.22	29.62
2141	0.0923	0.65	-0.584		2435	157.04	58.77	27.58
2141	-0.038	0.634	-1.15		2435	158.04	58.96	31.42
2141	0.177	0.807	-0.767		2435	156.96	59.03	30.73
2141	-0.202	-0.581	0.758		2435	158.08	59.12	30.12
2141	0.357	0.73	-1.13		2435	157.25	58.85	29.44
2141	-0.976	-0.338	0.142		2435	157.49	58.56	29.73
2141	0.0386	-1	1.39		2435	156.85	59.03	30.31
2141	0.96	1.33	-1.75		2435	156.78	58.76	30.2
2141	-0.583	-0.74	0.00505		2435	158.38	59.42	29.4
2141	0.68	1.14	-0.676		2435	156.7	59.1	30.48
2141	0.331	0.147	-0.861		2435	156.38	59.16	30.73
2141	-0.267	0.0708	-0.402		2435	157.09	58.53	29.81
2141	-0.227	-0.271	0.0596		2435	156.72	58.41	29.26
2144	0	0	0		2435	156.9	58.56	30.03
2144	193.48	99.01	40.55		2435	157.13	58.55	29.11
2147	0	0	0		2435	158	58.72	31.03
2147	198.86	24.35	15.99		2435	156.92	59.15	29.22
2156	0	0	0		2435	157.14	59.07	30.21
2156	106.66	250.03	42.47		2435	156.54	59.18	29.7
2156	1.3	2.13	3.81		2435	156.31	58.59	29.34
2156	-0.679	-0.5	-0.567		2435	156.59	58.59	29.81
2156	0.761	0.986	0.619		2435	157.19	58.81	29.68
2156	-0.392	-0.426	-1.12		2435	156.36	58.92	30.21
2156	-0.849	-1.38	-2.77		2435	157.64	59.08	29.45
2159	0	0	0		2435	156.48	58.76	28.61
2159	11.96	47.64	9.4		2435	156.5	58.69	29.75
2165	0	0	0		2435	156.33	58.65	28.59
2165	76.22	192.36	0.278		2435	157.44	58.59	28.33
2165	-0.978	0.0371	0.103		2435	156.46	58.41	29
2165	0.479	-0.549	0.0228		2435	155.59	58.88	30.16
2165	0.941	-2.32	0.294		2435	157.07	58.6	28
2179	0	0	0		2435	156.06	58.97	27.83
2179	95.64	210.18	10.88		2435	156.44	58.66	29.02
2179	3.96	1.86	1.16		2435	156.58	58.17	28.07
2179	3.67	1.37	1.13		2435	157.81	57.84	26.79
2179	-0.259	-0.25	0.23		2435	160.43	56.68	24.42
2179	0.282	0.153	0.316		2438	243.47	78.48	29.63
2179	0.358	0.217	-0.745		2438	248.58	82.36	32.03
2179	0.348	-0.254	0.306		2441	241.57	54.55	32.43
2179	-0.464	0.181	-0.279		2441	240.18	55.23	33.56
2179	-0.464	-0.356	-0.717		2444	165.4	2.75	30
2179	0.286	0.195	0.6		2444	167.55	3.88	28.98
2179	-0.0278	0.304	-0.388		2447	212.89	77.05	28.83
2179	0.11	-0.29	0.898		2447	215.51	79.95	33.29
2187	0	0	0		2450	228.34	96.1	31.17
2187	190.19	101.59	39.89		2450	229.11	92.15	33.65
2187	1.48	-2.11	1.17		2453	219.61	93.92	30.82
2187	0.535	-0.202	-0.241		2453	223.87	91.78	24.94
2187	-0.463	-0.0123	0.934		2456	12.54	9.38	27.43
2187	1.95	-1.51	0.0806		2456	7.56	7.5	25.51
2214	0	0	0		2459	243.88	50.6	37.5
2214	51.75	179.91	20.32		2459	242.97	55.85	40.08
2214	0.175	-0.452	-1.13		2462	240.21	71.24	32.08
2214	0.629	0.168	0.208		2462	238.25	77.9	30.61
2214	0.0874	0.317	-3.03		2468	224.35	93.46	38.36
2214	-0.115	0.0617	1.17		2468	221.54	87.25	39.18
2214	0.59	-0.0388	-0.546		2468	220.09	88.37	38.41
2214	-0.27	-0.653	2.36		2468	220.32	93.37	33.51
2214	0.226	0.127	-1.49		2468	216.33	86.94	33.22
2214	0.261	0.312	-0.796		2471	196.62	161.74	2.88
2214	0.185	-0.147	0.494		2471	195.92	161.15	2.7
2214	-0.497	0.154	0.455		2475	225.96	72.63	34.12
2214	-0.25	-2.06	-3.08		2475	227.35	73.74	33.44
2214	0.76	2.36	2.11		2475	224.02	76.15	30.25
2214	0.938	0.45	5.27		2478	246.99	81.69	31.01
2214	0.083	0.458	0.0325		2478	246.82	87.87	26.93
2214	-0.464	0.34	0.891		2481	246.01	71.87	35.25
2214	-0.304	-0.445	2.05		2481	250.44	69.69	31.59
2214	0.00384	0.37	-0.735		2484	232.64	98.34	38.1
2214	-0.311	-0.0176	2.39		2484	236.76	98.49	40.55
2214	-0.0272	-0.675	2.4		2488	213.92	83.86	36.62
2214	-0.842	-0.189	1.48		2488	213.3	81.66	34.29
2214	0.138	1.07	-1.03		2488	215.98	75.7	33.87
2214	0.565	-0.138	-0.803		2492	211.06	84.98	32.32
2217	0	0	0		2492	206.92	83.57	37.34
2217	207.38	53.09	3.35		2492	211.32	78.85	38.2
2231	0	0	0		2496	143.52	18.56	2.9
2231	4.76	140.55	5.13		2496	143.69	18.3	3.7
2231	0.817	-0.61	0.15		2496	143.82	18.38	2.85
2231	0.88	-0.0898	0.972		2499	246.03	77.19	22.32
2231	0.356	-0.361	-0.294		2499	247.48	73.89	29.07
2231	2.01	0.268	-0.0623		2502	235.1	89.3	34.87
2231	0.157	-0.33	0.381		2502	235.57	84.47	33.86
2231	-0.907	0.681	-1.06		2507	197.07	162.78	4.14
2231	1.84	-0.656	1.23		2507	196.05	161.71	3.54
2231	-0.502	0.249	-0.827		2507	197.07	163.12	2.98
2231	1.28	-0.593	0.161		2507	200.37	163.98	1.88
2243	0	0	0		2510	243.36	48.63	30.82
2243	209.1	79.55	44.22		2510	242.28	48.48	34.26
2243	0.598	0.128	-0.0122		2513	244.75	52.58	36.67
2243	0.892	-1.53	1.42		2513	240.77	53.27	33.1
2243	-0.141	0.601	-0.281		2516	243.02	57.37	32.71
2243	-0.571	0.64	-0.661		2516	245.27	58.71	37.52
2243	0.814	-0.956	0.944		2524	143.28	19.42	4.12
2243	-0.857	-0.0714	0.163		2524	143.73	19.21	4.79
2243	0.636	0.255	0.366		2524	142.96	19.4	4.12
2247	0	0	0		2524	143.45	19.2	3.89
2247	186.36	18.62	19.64		2524	143.68	18.48	3.25
2247	2.25	3.49	0.774		2524	143.92	18.27	4.52
[truncated: 333 more rows]

## Sheet: 4B
Displacement Rate (µm/min)
WT PTCRA-EGFP PyYM PBS	WT PTCRA-EGFP PyYM PT
0.121534	0.097316
0.22124	0.077167
0.504783	0.109891
0.286072	0.093344
0.644579	0.206186
0.246523	0.120759
0.603677	0.344292
0.401215	0.157778
0.866141	0.128084
0.656194	0.12563
0.950848	0.125892
0.546987	0.156023
0.975207	0.086657
3.03163	0.173317
1.86843	0.096423
	0.147056
	0.47132
	0.180214
	0.12791
	0.487404
	0.273854
	1.8896
	2.00954
	0.513676
	0.162599

## Sheet: 4D
Longest Axis of pDC (µm)		Surface Area of pDC (µm²)		Shape Factor of pDC
WT PTCRA-EGFP PyYM PBS	WT PTCRA-EGFP PyYM PT	WT PTCRA-EGFP PyYM PBS	WT PTCRA-EGFP PyYM PT	WT PTCRA-EGFP PyYM PBS	WT PTCRA-EGFP PyYM PT
12.16	9.63	91.85	120.84	0.12	0.13
9.36	7.37	75.14	74.14	0.125	0.145
11.09	4.21	125.27	16.65	0.104	0.202
11.01	7.75	117.14	63.76	0.114	0.14
9.36	4.29	83.11	23.07	0.122	0.182
15.18	5.81	126.06	33.84	0.105	0.154
8.68	3.52	67.5	17.6	0.136	0.207
12.94	10.12	91.73	111.03	0.114	0.142
8.79	7.95	97.59	62.01	0.115	0.137
14.2	4.21	187.74	13.94	0.1	0.227
11.01	3.52	82.21	15.7	0.12	0.22
9.15	3.88	94.7	16.72	0.116	0.22
7.51	9.82	77.76	74.23	0.125	0.127
16.15	5.48	263.77	19.61	0.0854	0.19
16.36	9.12	163.26	109.14	0.104	0.138
14.49	10.32	101.65	123.31	0.11	0.127
16.49	7.51	280.2	37.6	0.0828	0.16
17.58	4.91	183.42	20.6	0.0927	0.156
9.53	6.14	75.82	43.24	0.126	0.156
16.95	4.24	273.26	21.59	0.0846	0.183
12.25	4.91	87.97	15.26	0.119	0.214
10.03	5.34	69.17	19.91	0.131	0.183
12.49	10.43	80.89	203.42	0.121	0.127
15.69	5.66	140.51	37.79	0.0956	0.156
12	7.59	94.94	35.35	0.115	0.15
13.54		131.22		0.101
13.72		279.08		0.083
13.36		198.47		0.0951
12.25		165.63		0.0927
9.06		88.84		0.117
18.36		458.87		0.073
15.76		228.96		0.0916
34.95		992.01		0.0553
19.37		316.87		0.0789
9.55		126.5		0.104
11.54		104.86		0.107
16		184.53		0.0927
23.5		355.3		0.0829
16.93		170.74		0.0939

## Sheet: 4E
% YFP+ pDC			CD86 MFI pDC			CD62L MFI pDC			CXCR3 MFI pDC			ICAM-1 MFI pDC			VCAM-1 MFI pDC
Naïve	PyYM+PBS	PyYM + PT	Naïve	PyYM+PBS	PyYM + PT	Naïve	PyYM+PBS	PyYM + PT	Naïve	PyYM+PBS	PyYM + PT	Naïve	PyYM+PBS	PyYM + PT	Naïve	PyYM+PBS	PyYM + PT
0.167	2.44	0.775	20.9	113	66.4	436	314	284	180	10.3	48.3	1292	2299	2337	307	34.2	86.1
0.159	1.23	0.182	6.51	105	71.1	358	331	281	179	14	70	1240	2165	2097	115	48.3	62.9
0.075	2.54	0.204	9.73	122	51.3	313	349	179	400	15.4	237	1170	2420	1106	155	30.3	53.8
0.135	3.12	1.15	108	125	43.1		353			10.9	180		2751	1204		19.8	114
0.128	1.57	0.296		109	300		268			86.1			2760			84.8
0.0486	1.37	0.601		132	294		319			87.6			2105			50.5
0.0874	2.46	0		128	280		300			67			2273			50.9
0.0895	2.27	0		706	388
0.0568	1.24	0		562	334
	1.77	0.689		504	385
	3.28	1.03

## Sheet: 4F
% YFP+ pDCs
PyYM	PyYM + Isotype	PyYM+anti-CXCR3	PyYM+anti-CXCR3 +anti-CXCL9	PyYM+aLFA1	PyYM+aLFA1+aVLA4	PyYM + anti-CXCR3 + anti-LFA1	Naive
1.24	0.942	3.67	1.59	0.577	2.97	0.033	0.0895
1.77	2.14	2.27	1.36	2.94	2.17	2.35	0.0568
3.28	1.75	1.99	0.757	1.51	1.8	1.64	0.128
1.57	1.4	1.49		2.25		1.53	0.0486
1.37	1.61	0.0539		1.31			0.075
2.46	1.21	0.465		1.81			0.135
2.27	2.25	3.05		1.56			0.167
2.44	1.17			0.744			0.159
1.23	0.157			2.32			0.0483
2.54	0.441			1.08			0.0645
3.12	1.25			1.71			0.0407
1.73	2.03						0.00904
0.601	2.66						0.0308
3.29
3.06
1.4
1.29
2.14
2.61
1.59
1.18
