# Supplementary material for: CD169+ macrophages orchestrate plasmacytoid dendritic cell arrest and retention for optimal priming in the bone marrow of malaria-infected mice
Source: eLife. 2022 Oct 24;11:e78873. doi: 10.7554/eLife.78873 (PMC9648966; doi:10.7554/eLife.78873)
Supplement: Figure 5—figure supplement 1—source data 1. [file elife-78873-fig5-figsupp1-data1.xlsx]

## Sheet: 4
				expression on pDCs
CD86 MFI				CD11a MFI				ICAM-1 MFI				VCAM-1 MFI				CXCR3 MFI				CCR9 MFI				CXCR4 MFI				CX3CR1 MFI
WT Naive	WT Py YM	StingGt/Gt Py YM		WT Naive	WT PyYM	STINGGt/Gt PyYM		WT Naive	WT Py YM	StingGt/Gt Py YM		WT Naive	WT Py YM	StingGt/Gt Py YM		WT Naive	WT Py YM	StingGt/Gt Py YM		WT Naive	WT PyYM	StingGt/Gt Py YM		WT Naive	WT PyYM	STINGGt/Gt PyYM		WT Naive	WT PyYM	StingGt/Gt Py YM
117	496	370		8182	9685	6579		574.58	1212.85	601.38		186	88	104		133	22.2	32		1339.73	2256.19	1506.83		166.87	105.93	125.81		60.53	129.14	79.91
130	412	284		11113	9568	4702		660.83	1049.81	481.05		166.87	70.6	108		143	18.1	26.4		1501.89	2017.63	1368.48			51.67	176.73		46.72	163.41	89.53
129	440	348		9833	7559	10207		475.72	1241.93	976.32		103	105.93	125.81		118	15.8	15.3		1702	1751.3	1589.67						84.6	103.03	104.69
115	754	725		10404	8920	6565		538	983.24	938.38		105	51.67	176.73		136	12.41	10		1722	2140	1351		116	152	150			123.55	78.93
94.6	656	778		4793	8997	8226		714	958.01	1171.71			85.2	182		108	12.04	56.43			2013	1819		137	116	140			151.62	77.68
	502	545		2827	2148	4543			1160	1641			60.1	125		70.39	15.9	47.31							116	128
	499	679		5167	3928	3868			1081	1098			52	116		67.7	8.44	33.69
	558				2507				1423							85.18	34.65	63.15						214	123	129
	502				1632				1051							149.6	28.15	26.53						178	97.3	150
	571								1560							140.1	14.01	78.2							68.5
	496								1387								31.32	92.58
																	25.5
