# Supplementary material for: CD169+ macrophages orchestrate plasmacytoid dendritic cell arrest and retention for optimal priming in the bone marrow of malaria-infected mice
Source: eLife. 2022 Oct 24;11:e78873. doi: 10.7554/eLife.78873 (PMC9648966; doi:10.7554/eLife.78873)
Supplement: Figure 5—source data 1. [file elife-78873-fig5-data1.xlsx]

## Sheet: 5A
Uninfected StingGt/Gt PTCRA-EGFP					Py YM-infected, 36 hrs StingGt/Gt PTCRA-EGFP
190906_sting naive 2x xyz					190911 STING 36h (1) (1-3) 2x 3rd spot pDC tracks v1 w centroid xyz
Track ID	Centroid X (µm)	Centroid Y (µm)	Centroid Z (µm)		Track ID	Rel. Centroid X (µm)	Rel. Centroid Y (µm)	Rel. Centroid Z (µm)
286	157.35	146.16	20.35		123	0	0	0
286	159.16	142.62	23.21		123	147.35	86.32	11.02
286	159.61	143.42	22.64		123	0.0267	-0.437	0.0531
286	160.1	142.71	22.04		123	-0.255	0.267	-0.12
286	159.48	142.79	23.4		123	0.634	-0.439	-1.02
286	159.7	142.65	22.46		123	-0.135	-0.00237	0.675
286	161.11	141.1	24.6		123	0.109	-0.217	-0.945
286	160.62	142.32	24.86		123	0.256	0.168	0.317
286	160.69	141.93	24.05		123	-0.0161	0.39	-0.281
286	162.41	140.67	28.53		123	-0.0789	-0.446	-0.887
286	161.9	140.83	24.81		123	-0.571	-0.376	0.275
286	160.56	139.36	23.16		123	0.0137	0.0301	0.639
286	158.26	142.26	22.76		123	-0.31	0.457	-0.704
286	162.84	139.11	24.07		123	0.145	-0.265	0.545
286	160.9	138.11	21.99		123	0.446	0.263	-1.77
286	161.34	136.66	16.92		123	0.0526	-0.0824	0.956
286	161.92	135.63	15.19		123	0.14	-0.283	-0.801
286	162.38	134.77	13.33		123	-0.395	-0.602	0.397
286	162.42	134.49	13.42		123	0.173	0.287	-0.865
286	162.62	134.94	14.46		123	-0.0224	0.348	-0.104
286	161.97	133.74	11.95		123	-0.373	-0.209	-0.000154
286	161.41	135.35	11.33		123	0.197	0.504	-0.435
286	160.49	135.41	10.7		123	0.402	0.204	0.707
286	160.54	135.37	10.16		123	-0.383	0.15	0.112
286	160.4	135.18	11.05		123	0.383	0.141	-0.226
286	160.83	135.55	12.99		123	-0.52	-0.684	0.119
286	163.02	131.37	8.83		123	-0.0983	-0.406	-0.825
286	159.5	131.05	8.44		123	0.919	0.126	0.171
286	161.14	134.65	10.54		123	-0.507	-0.324	-0.135
286	161.63	135.42	10.18		123	0.425	-0.532	-0.0656
286	162.04	135.01	12.44		123	1.03	-0.31	-0.0352
286	162.05	134.78	10.67		123	0.416	-0.128	-0.271
286	161.79	134.86	12.67		123	0.835	2.82	0.946
286	162.85	134.85	12.96		123	-0.575	0.81	0.688
286	162.42	135	14.02		123	-0.0321	-0.0909	0.219
286	162.25	135.62	14.93		123	-0.417	0.409	0.101
286	159.96	135.43	10.5		123	0.0784	-0.382	-0.115
286	159.28	135.89	9.85		123	-0.417	0.59	0.0626
286	158.47	134.68	9.66		123	-0.573	-0.632	0.506
286	153.38	132.64	8.65		123	-0.764	0.269	0.065
286	152.5	132.73	8.8		123	-0.31	0.106	-0.378
286	151.14	132.75	9.58		123	0.0787	-0.113	-0.279
286	148.72	132.29	9.65		123	0.432	0.275	-0.452
286	150.12	132.12	10.28		123	-1.18	0.106	0.604
286	151.1	131.8	10.15		123	-0.458	-0.594	0.73
286	150.17	132.05	11.57		123	0.232	0.231	-0.826
286	149.17	131.72	10.88		123	-0.576	0.00725	0.85
286	147.61	131.99	8.18		123	-0.171	-0.0646	-1.17
286	146.62	131.94	9.22		123	0.413	0.531	0.0721
286	146.71	132.5	10.8		123	-0.621	0.294	0.231
286	145.25	131.75	10.84		123	-0.071	0.175	-0.4
286	144.96	131.62	11.42		123	0.252	-0.975	-0.0125
286	142.32	131.44	11.55		123	-0.77	0.33	0.8
286	144.11	131.68	12.27		123	0.753	0.404	-0.356
286	143.76	130.15	13.45		123	0.216	0.0514	0.54
286	144.65	130.28	11.58		123	-0.764	-0.391	1.05
286	145.07	130.26	11.27		123	-0.0672	0.616	-2.09
286	146.79	128.87	11.44		123	0.36	0.0655	-0.133
286	146.24	130.34	14.46		123	-0.189	-0.201	0.67
286	147.89	130.21	12.19		123	0.85	-0.118	-0.0177
286	147.04	130.06	12.09		123	-0.123	-0.16	-1.02
286	145.5	130.33	12.05		123	-0.418	-0.168	0.239
286	145.84	129.86	13.75		123	-0.306	0.263	0.437
286	145.97	129.83	12.68		123	0.768	0.483	0.0823
286	145.7	130.73	11.71		123	-0.865	-0.506	-0.103
286	145.82	129.87	11.93		123	1.6	-0.351	0.384
286	145.19	129.85	14.14		123	-0.471	-0.0725	-0.25
286	145.54	129.88	14.04		123	0.0835	0.332	-0.172
286	143.21	126.22	17.64		123	0.69	0.00188	0.689
286	138.81	123.39	22.06		123	0.628	-0.000515	0.623
286	139.53	124.15	16.08		123	-0.366	0.158	-0.303
286	134.55	124.24	20.67		123	0.0454	0.23	0.128
286	137.59	124	19.96		123	-0.0519	0.51	-1.22
286	137.07	125.61	16.55		123	0.15	-0.00873	-0.508
286	138.83	124.88	17.36		123	0.283	0.803	-0.672
286	138.76	124.16	15.59		123	0.29	-0.492	0.626
286	140.29	123.33	16.06		123	0.149	0.587	-0.41
286	140.06	123.22	17.83		123	-0.373	-0.0357	-0.694
286	137.51	124.24	18.57		123	0.253	-0.444	0.289
286	139.21	123.74	16.98		123	-0.33	0.371	-0.544
286	137.79	124.21	18.99		123	-0.111	0.114	-0.493
286	136.88	124.99	18.38		123	0.221	0.651	0.266
286	136.67	125.83	17.78		123	-0.0314	0.583	0.24
286	136.51	126.05	19.38		123	0.619	0.615	-0.217
286	137.17	128.44	16.85		123	0.109	0.135	-0.265
286	133.05	129.7	11.17		123	-0.0578	1.24	-0.813
286	132.27	132.04	7.65		123	0.281	0.741	0.357
286	133.78	131.24	10.31		123	-0.249	-0.647	-0.684
286	133.39	131.47	10.21		123	0.14	0.57	0.392
286	131.68	131.84	9.93		123	0.151	0.0988	-0.643
286	132.96	130.27	13.47		123	0.0837	-0.1	-0.112
286	132.88	132.2	11.16		123	0.19	0.359	0.341
286	131.4	130.17	9.62		123	1.05	0.865	0.221
286	133.83	132.35	10.2		123	-0.228	-0.224	-0.787
286	135.5	134.76	9.16		123	0.481	0.236	0.373
286	137.62	136.64	8.71		123	0.235	-0.946	0.128
286	139.13	138.79	9.28		123	-0.465	0.757	-0.582
286	139.34	141.62	6.61		123	-0.308	0.0705	-0.4
286	138.81	143.41	9.28		123	-0.339	0.134	0.545
286	138.63	142.84	8.62		123	-0.199	-0.365	-0.604
286	139.16	144.46	10.34		123	-0.44	0.318	0.339
286	141.94	147.39	12.89		123	0.287	-0.266	0.796
286	142.34	148.97	12.15		123	0.00917	0.276	-0.779
286	142.53	149.61	12.09		123	-0.101	-0.627	0.285
286	144.13	149.95	11.5		123	1.23	0.24	1.37
286	145.38	151.11	13.12		123	-1.07	-0.187	-1.21
286	146.84	152.6	12.12		123	-0.316	-0.0561	-0.0188
286	147.23	154.19	12.22		123	0.341	0.46	0.566
286	147.64	155.07	10.53		123	0.0198	-0.286	-0.148
286	148.04	157.21	13.28		123	-0.414	-0.207	-0.132
286	147.74	156.52	11.79		123	1.08	0.358	0.28
286	146.55	156	10.55		123	-0.924	0.5	-1.24
286	147.3	156.43	10.11		123	0.869	-0.421	0.829
286	148.58	159.09	11.7		123	-0.722	-0.154	-0.816
286	149.18	161.14	9.26		123	0.178	0.489	-0.0724
286	149.45	162.15	8.91		123	0.682	-0.872	0.712
286	149.86	162.74	8.63		123	-0.281	0.533	-1.14
286	150.2	162.61	9.31		123	0.434	0.161	1.25
286	150.51	162.56	6.56		123	0.214	0.375	-0.324
286	151.2	162.29	8.84		123	1.98	2.89	2.32
286	151.49	163.27	7.7		123	1.45	0.744	0.156
286	151.86	162.9	7.76		123	3.29	3.57	-0.665
286	152.57	163.45	7.97		246	0	0	0
286	152.46	163.19	9.87		246	234.26	28.38	28.3
286	153.34	163.91	9.33		246	0.228	0.852	-1.32
286	153.77	164.35	9.47		246	0.118	-1.17	-0.731
286	153.88	164.48	9.86		246	-0.333	0.189	1.17
411	237.25	73.95	2.7		246	0.0427	0.339	-0.999
411	237.49	74	2.88		246	0.58	0.166	0.406
411	237.71	73.32	3.04		246	-0.348	-0.512	-1.33
411	238.17	73.2	2.9		246	0.479	0.906	1.03
411	237.48	73.17	2.63		246	0.0692	-1.53	0.601
411	237.04	74.08	2.93		246	0.386	1.56	-1.53
411	237.57	75.19	3.41		246	-0.141	0.181	0.456
411	237.68	74.78	4.22		246	-0.0154	-0.0875	-0.151
411	237.94	73.51	4.13		246	0.162	-0.251	-2.29
411	237.73	71.76	2.84		246	0.103	0.489	-0.316
411	238.01	72.59	2.51		246	-0.15	-0.624	0.0209
411	238.02	72.35	2.8		246	-0.106	-0.258	-0.439
411	236.86	71.2	3.32		246	0.128	0.218	1.2
411	237.91	72.77	2.67		246	0.17	-0.531	-2.28
411	238.09	72.31	2.9		246	-0.242	-0.122	-0.131
411	237.84	71.94	3.16		246	0.47	0.479	-0.416
411	238.34	73.18	3.98		246	-0.134	-0.0945	0.984
411	238.47	71.78	4.23		246	0.489	-0.489	3.04
411	238.44	73.97	3.22		246	-0.628	0.0115	-3.12
411	238.24	73.21	3.93		246	-0.0035	0.721	0.901
411	238.29	73.3	4.16		246	0.357	-0.796	-1.15
411	237.96	73.68	3.47		246	-0.342	-0.332	-1.08
411	238.09	72.99	4.49		246	0.116	0.516	0.525
411	237.69	72.73	3.66		246	0.0821	0.0889	1.72
411	238.08	73.7	3.35		246	0.0263	0.232	-0.595
411	238.01	72.79	3.37		246	0.154	-0.00808	1
411	238.03	73.2	3.83		246	-0.16	-0.679	-1.64
411	237.91	72.54	4.09		246	-0.333	0.778	0.525
411	237.49	72.1	4.35		246	0.448	-0.381	-0.928
411	237.54	73.38	4.03		246	-0.108	-0.311	0.782
411	237.77	72.83	4.61		246	0.305	0.47	0.151
411	237.55	72.46	3.6		246	-0.0878	-0.292	0.0748
411	237.62	73.12	3.79		246	-0.245	0.208	-2.06
411	237.3	72.23	3.87		246	0.0724	-0.235	1.81
411	237.22	71.5	4.83		246	-0.173	0.233	-0.0393
411	237.36	71.27	4.69		246	-0.147	-0.0793	-0.837
411	237.14	71.56	4.64		246	0.0416	-0.0726	-1.45
411	237.29	71.15	4.45		246	0.439	0.126	0.862
411	237.41	71.98	3.9		246	-0.156	0.298	0.984
411	237.4	70.87	4.26		246	-0.132	-0.21	-0.2
411	237.26	71.69	4.54		246	-0.0329	-0.274	0.298
411	237.16	71.07	4.65		246	-0.182	-0.336	-0.793
411	237.45	70.97	4.41		246	-0.141	0.226	0.0645
411	236.85	70.47	5.06		246	-0.347	-0.327	-0.225
411	236.83	70.52	3.5		246	0.224	0.0298	0.928
411	237.06	71.36	5.39		246	-0.146	0.153	-1.18
411	237.2	70.57	4.13		246	-0.303	-0.58	0.447
411	237.66	71.38	4.05		246	0.0541	0.608	-0.675
411	237.37	70.64	4.14		246	0.028	-0.237	0.862
411	237.46	70.69	4.57		246	-0.183	0.196	-1.79
411	237.55	71.05	4.38		246	0.186	-0.43	0.194
411	237.54	70.95	4.69		246	-0.149	0.31	2.07
411	237.92	70.6	4.76		246	0.336	0.145	-3.67
411	237.82	71.08	3.49		246	-0.162	-0.00978	1.46
411	238.09	69.52	3.63		246	0.105	-0.173	1.28
411	238.43	69.91	4.71		246	-0.515	-0.104	-2.32
411	237.67	70.23	5.33		246	0.0174	0.159	0.65
411	237.53	70.63	4.67		246	0.223	-0.193	0.111
411	238.09	70.41	4.44		246	0.0924	0.533	-0.551
411	237.78	70.56	4.71		246	-0.265	-0.0473	0.539
411	237.67	70.55	4.32		246	0.227	-0.113	1.5
411	237.98	70.11	4.74		246	0.157	0.0534	-3.23
411	237.71	69.7	5.03		246	-0.447	-0.0672	1.71
411	238.09	69.64	6.06		246	0.406	0.322	-0.278
411	237.78	68.9	6.06		246	0.0212	0.113	0.0539
411	238	69.55	5.37		246	-0.022	-0.625	-0.529
411	237.9	69.34	5.29		246	-0.213	0.622	0.424
411	237.83	69.3	4.8		246	0.206	-0.446	-2.8
411	237.15	68.81	5.85		246	0.0316	0.358	0.361
411	238.1	68.4	6.67		246	-0.164	-0.00784	0.476
411	237.93	68.54	5.92		246	0.191	-0.0357	0.852
411	238.07	69.14	7.25		246	0.0391	0.0773	-1.22
411	238.09	69.28	7.41		246	-0.183	0.535	0.192
411	237.92	69.87	7.78		246	-0.196	-0.428	-1.31
411	238.02	70.29	7.86		246	0.254	0.383	0.35
411	238.13	70.06	7.56		246	0.385	-0.111	0.0743
411	238.19	70.3	7.58		246	0.184	0.212	0.841
411	238.15	69.74	7.65		246	0.516	0.175	1.15
411	237.98	69.42	7.72		246	-0.161	0.0907	-1.69
411	237.95	68.83	7.56		246	-0.155	-0.628	-0.679
411	237.83	68.63	8.05		246	-0.299	0.35	0.0671
411	237.42	69.08	7.33		246	-0.694	0.728	-1.89
411	237.4	68.66	7.13		246	-0.0208	-0.136	1.73
411	237.09	68.41	6.64		246	1.05	-0.66	0.698
411	237.82	69.7	7.93		246	-0.277	0.503	0.242
411	237.13	67.92	6.17		246	-0.193	-0.421	-0.899
411	237.23	67.6	6.35		246	-0.111	0.31	0.649
411	237.36	68.36	6.98		246	0.138	-0.129	0.221
411	237.56	68.59	6.58		246	-0.731	0.653	-1.61
411	237.75	68.94	7.39		246	0.781	-0.796	-1.28
411	238.04	69.34	6.54		246	-0.278	-0.403	0.821
411	238.31	69.77	6.7		246	0.0395	0.229	0.304
411	238.05	69.83	7.04		246	0.101	-0.228	-0.378
411	238.01	69.88	7.26		246	-0.203	0.502	0.887
411	238.09	70.62	4.95		246	-0.295	-0.727	-1.91
411	239.17	70.25	6.24		246	-0.0747	0.0845	0.0448
411	238.99	70.21	6.34		246	-0.118	0.81	0.0739
411	239.82	70.09	8.36		246	0.225	-0.73	1.17
411	239.92	69.25	8.45		246	0.218	0.324	-0.0208
411	238.81	69.37	8.27		246	-0.544	0.179	-0.729
411	239.24	69.26	6.56		246	0.0736	-0.37	1.01
411	239.02	70.01	6.11		246	0.232	0.795	-1.4
411	238.95	70.39	5.57		246	0.251	-0.928	-0.588
411	238.72	69.59	5.76		246	-0.148	0.376	0.208
411	238.62	68.91	5.54		246	-0.04	0.121	3.62
411	239.27	69.43	5.79		246	0.105	0.449	-2.51
411	239.48	69.12	5.26		246	-0.51	0.15	0.822
411	239.49	68.49	4.47		246	0.358	-0.258	-0.0847
411	240.89	69.19	5.25		246	0.299	-0.207	-1.39
411	242.12	70.37	5.55		246	0.267	-0.199	-0.276
411	241.38	70.77	4.16		246	0.129	0.151	0.838
411	240.91	70.76	3.53		246	0.191	0.213	-1.29
411	240.71	70.77	4.17		246	-0.337	-0.388	0.777
411	241.73	71.57	3.89		246	-0.471	-0.0841	0.396
411	241.34	71.36	4.72		246	0.23	0.603	-1.56
411	242.58	70.32	4.04		246	0.0246	-0.289	1.28
411	242.25	70.61	5.5		246	0.0364	-0.0273	-0.922
411	242.49	70.26	4.69		369	0	0	0
411	242.7	70.14	5.08		369	238.65	162.76	19.95
411	243.89	71.25	5.73		369	-0.531	0.114	-1.75
411	243.35	71.1	6.16		369	0.636	-0.744	0.372
411	243.21	70.93	4.95		369	-0.733	0.188	-1.14
411	243.66	71.74	6.5		369	-0.357	0.324	-0.131
411	243.07	71.82	6.18		369	0.149	0.363	-0.0329
523	75.21	66.71	42.48		369	-0.104	-0.545	-0.444
523	75.04	68.09	42.59		369	1.36	-0.56	-0.888
523	75.81	67.54	41.89		369	-0.124	0.833	0.991
523	74.9	68.65	42.58		369	0.21	-0.468	-0.348
523	74.75	68.22	43.52		369	-0.0465	0.315	-0.0334
523	74.23	68.39	42.35		369	-0.201	0.244	1.3
523	74.31	68.72	42.46		369	0.0528	0.262	-0.288
523	74.19	68.88	41.84		369	-0.976	-0.571	-1.03
523	75.69	67.32	40.72		369	0.783	0.147	0.509
523	75.82	67.59	41.5		369	-0.274	-0.448	-0.974
523	75.3	67.37	40.16		369	-0.251	0.742	0.377
523	76.5	66.4	40.39		369	0.403	0.25	-0.21
523	76.71	65.93	39.84		369	-0.57	-0.312	-0.128
523	76.03	67.03	40.52		369	0.794	0.0115	-0.0695
523	76.23	66.94	40.27		369	-0.522	0.269	0.638
523	76.06	66.41	40.69		369	0.302	0.343	-1.59
523	77.39	64.39	40.63		369	-0.639	-1.12	0.415
523	76.84	66.06	38.38		369	-0.538	-0.125	-0.738
523	76.22	67.14	40.08		369	0.51	1.65	2.01
523	76.04	67.43	39.28		369	-0.0633	-0.361	-1.62
523	76.3	67.7	39.5		369	-0.854	-0.149	0.524
523	77.28	65.54	39.39		369	1.54	-0.0225	0.27
523	76.84	66.5	38.12		369	0.218	-0.804	0.5
523	76.24	65.14	38.8		369	-0.558	-0.141	-1.62
523	76.89	64.55	39.83		369	0.737	1.19	1.81
523	77.19	64.9	39.76		369	0.0557	0.0581	-0.0854
523	76.41	63.55	39.7		369	-1.42	1.49	-0.221
523	75.95	65.48	39.01		369	1.38	-1.53	0.263
523	76.77	64.16	38.22		369	-0.213	-0.636	-0.00978
523	77.06	64.1	36.81		369	-0.817	-1.95	-1.31
523	75.85	63.72	38.6		369	1	2.3	-0.18
523	74.57	63.44	36.05		369	-0.435	0.259	-0.575
523	74.71	62.94	37.53		369	-0.0468	-1.27	0.334
523	72.91	63.96	35.28		369	0.281	0.72	1.33
523	74.35	63.34	38.71		369	0.49	0.0839	-1.8
523	73.29	62.76	37.51		369	-0.144	-0.394	0.38
523	73.02	62.32	38.21		369	-1.31	-0.31	1.2
523	72.95	61.87	38.03		369	-0.168	-0.3	-1.85
523	73.85	60.74	36.63		369	-1.56	0.216	-0.857
523	75.28	59.3	35.36		369	1.33	-2.49	0.296
523	74.61	59.4	35.75		369	-0.0672	-0.706	0.357
523	74.08	59.06	35.51		369	-0.29	-0.144	0.811
523	73.45	59.56	35.27		369	-0.333	1.22	-1.81
523	72.44	58.65	34.13		369	-0.0713	0.285	0.0228
523	73.18	58.62	34.01		369	0.665	-0.657	0.865
523	72.91	58.95	34.94		369	-0.184	0.792	0.0283
523	72.94	58.07	32.69		369	-0.43	-0.666	-0.588
523	72.92	57.91	32.82		369	0.0648	-0.329	0.812
523	73.42	56.72	32.74		369	0.233	1.51	0.957
523	74.19	55.99	32.73		369	0.212	-0.566	0.421
523	74.57	55.72	33.19		369	0.272	0.656	-1.82
523	73.41	55.65	32.71		369	0.468	0.174	0.82
523	73.46	55.34	31.98		369	0.0596	-0.414	-0.737
523	74.47	54.22	32.46		369	0.232	0.547	0.616
523	74.56	54.02	25.47		369	-1.01	-0.232	-0.0825
523	76.07	53.12	32.07		369	-0.00248	0.203	-0.65
523	75.74	53.32	31.51		369	0.616	0.05	-0.172
523	76.58	53.16	31.04		369	-0.0424	0.0316	1.03
523	76.36	53.38	31.44		369	0.411	-0.0443	-1.04
523	77.21	53.36	32.05		369	-0.936	0.563	0.13
523	77.06	52.82	32.76		369	1.37	-0.0118	0.554
523	77.48	52.58	32.15		369	-0.97	0.191	-0.468
523	77.08	52.41	31.15		369	0.593	0.404	-0.235
523	77.13	52.12	30.33		369	-0.577	-1.25	0.596
523	76.75	51.25	30.59		369	0.244	-0.422	0.272
523	76.92	51.07	31.47		369	-0.525	-1.77	-1.4
523	77.49	49.85	31.87		369	0.00362	0.0572	-0.392
523	76.17	47.36	34.34		369	-0.279	0.764	1.41
523	75.26	47	35.07		369	-0.257	-0.372	-1.71
523	74.72	45.72	36.38		369	0.0954	-0.337	1.1
523	74.52	44.36	36.99		369	-0.46	-0.717	-0.0702
523	73.34	44.19	37.12		369	0.138	0.0668	-0.562
523	73.13	44.22	36.94		369	0.0938	1.01	-0.154
523	72.32	42.38	38.13		369	-0.126	-0.234	-0.936
523	72.73	41.67	37.19		369	0.202	0.765	1.99
523	72.13	41.65	37.79		369	-1.07	-0.621	-1.48
523	71.18	40.71	38.93		369	1.34	0.705	0.023
523	70.26	39.86	37.78		369	-0.558	0.1	0.282
523	68.73	40.12	38.34		369	0.284	-0.505	-0.365
523	68.49	38.98	38.09		369	-0.349	-0.333	-0.308
523	68.21	38.76	39.83		369	-0.827	0.204	0.964
523	68.25	39.27	37.49		369	0.0726	0.182	-0.202
523	67.01	39.48	36.95		369	0.2	-0.804	-0.594
523	66.92	39.51	36.68		369	0.178	-0.0401	-0.591
523	66.97	39.24	36.09		369	-0.496	-0.0119	0.387
523	66.9	40	36.95		369	-0.223	0.526	0.223
523	66.83	39.62	36.39		369	0.282	-0.555	-1.82
523	66.45	39.39	34.97		369	1.09	-0.237	1.64
523	65.93	39.24	35.6		369	-0.476	0.0549	-0.73
523	66.61	38.71	34.48		369	-0.587	-0.689	-1.09
523	67.36	39.4	35.08		369	0.184	1.25	0.677
523	67.51	40.27	35.75		369	-0.237	-0.345	-0.694
523	68.1	40.44	35.23		369	0.2	0.237	0.946
523	67.71	39.96	35.54		369	-0.249	-0.316	-0.416
523	67.97	39.95	35.43		369	0.626	1.21	-0.453
523	68.42	40.26	35.25		369	0.0249	-1.11	0.282
523	68.62	40.35	34.77		369	0.0712	1.43	0.729
523	67.87	40.21	33.86		369	-0.0592	-0.221	-0.469
523	67.52	41.16	34.28		369	0.247	1.31	0.0203
523	67.09	41.83	33.39		369	-0.16	0.296	0.728
523	67.68	43.28	33.62		369	-0.145	0.0809	0.179
523	67.66	43.45	32.99		369	0.151	0.357	-0.865
523	68.3	43	34.49		369	-0.125	0.0828	-0.346
523	68.62	44.18	34.56		369	-0.29	-0.511	0.0545
523	68.37	45.04	32.31		369	-0.489	0.363	0.349
523	68.59	45.54	32.49		369	-0.0362	-0.493	-0.891
523	68.51	45.89	32.71		369	-0.0574	0.654	0.513
523	67.5	47.6	32.81		369	0.604	-0.268	-0.533
523	66.56	48.39	32.78		369	0.427	1.02	0.243
523	66.36	50.82	31.52		369	3.91	-2.14	2.17
523	66.81	54.4	29.15		369	-4.09	2.13	-2.41
616	73.28	121.41	5		369	-0.314	-0.0956	-0.217
616	73.8	121.66	4.95		369	0.256	0.572	0.469
616	72.85	121.89	4.36		369	-0.106	0.878	-0.435
616	73.61	121.93	6.38		369	0.326	-0.212	0.287
616	73.22	121.76	4.32		492	0	0	0
616	73.01	122.09	4.16		492	233.53	51.28	37.81
616	73.09	122.05	4.94		492	-0.436	0.686	-1.09
616	73.39	122.14	4.13		492	-0.923	-1.25	1.42
616	73.31	121.99	5.14		492	0.395	-0.0842	-0.758
616	73.74	122.13	5.12		492	-0.996	0.513	-0.417
616	74.42	121.96	5.01		492	0.406	-0.677	0.0178
616	73.76	122.37	5.43		492	0.509	-0.419	0.622
616	75.55	121.6	4.3		492	0.524	0.232	-0.503
616	76.41	121.63	4.4		492	-0.885	0.191	-0.168
616	75.57	121.84	5.03		492	-0.0507	-0.389	0.555
616	75.69	121.62	4.01		492	0.162	0.0847	-1.66
616	76.89	121.81	4.54		492	0.052	-0.252	0.871
616	76.35	121.87	4.92		492	0.03	0.234	-0.619
616	76.76	122.36	5.87		492	0.00854	-0.193	-0.451
616	76.71	122.47	6.55		492	0.402	0.105	0.758
616	77.04	122.08	4.85		492	-0.0995	0.196	0.137
616	76.54	122.74	4.17		492	-0.418	0.115	0.405
616	77.81	121.9	5.04		492	-0.138	-0.179	-0.968
616	78.34	122.43	6.84		492	-0.349	-0.0182	-0.197
616	77.45	122.33	6.91		492	0.143	-0.399	0.619
616	76.93	122.57	6.8		492	-0.448	0.336	0.255
616	76.56	122.65	6.29		492	0.774	-0.285	1.33
616	76.75	123.09	5.27		492	0.052	0.406	-1.11
616	76.3	123.1	7.68		492	0.0488	0.0605	0.0397
616	76.43	122.65	6.22		492	-0.193	-0.609	-1.09
616	76.79	123.03	6.41		492	-0.176	-0.0511	0.738
616	76.99	122.84	6.93		492	0.592	0.62	-0.0275
616	77.28	122.77	6.38		492	0.0995	-0.243	0.116
616	78.13	123.47	6.81		492	-0.443	-0.256	0.135
616	76.44	122.86	7.85		492	0.596	-0.0956	-0.415
616	75.88	122.48	6.14		492	-0.472	-0.106	1.26
616	75.2	122.63	8.79		492	0.943	0.333	-0.823
616	76.8	123.08	7.52		492	-0.219	0.00325	-0.687
616	76.51	123.3	6.44		492	0.216	-0.0502	0.76
616	76.34	122.9	6.45		492	-0.215	0.344	-1.76
616	76.63	123.07	7.16		492	0.054	-0.0696	2.03
616	76.75	123.48	7.66		492	0.101	0.389	-0.0388
616	77.7	122.6	7.75		492	-0.395	-0.0694	-0.985
616	76.24	122.43	5.91		492	0.137	-0.731	0.457
616	75.84	122.57	7.8		492	-0.0485	-0.155	-0.637
616	76.35	122.25	8.62		492	0.297	-0.0906	0.278
616	78.83	122.95	7.17		492	0.169	-0.158	0.119
616	75.07	123.58	10.29		492	-0.567	-0.247	1.1
616	79.92	123.5	8.01		492	0.521	0.575	-2.1
616	75.23	123.38	7.53		492	-0.411	-0.0812	0.0316
616	80.26	123.63	5.75		492	0.822	0.0737	0.939
616	78.91	123.6	6.37		492	-0.307	0.55	-0.679
616	78.51	124.34	7.42		492	0.196	-0.16	-0.214
616	76.51	123.08	6.52		492	-0.114	-1.08	0.837
616	74.87	128.63	7.81		492	0.454	0.76	-1.36
616	75.84	128.68	7.51		492	-0.293	-0.0572	0.474
616	77	126.45	6.74		492	0.864	0.0033	-1.04
616	78.24	126.32	8.3		492	-1.17	-0.787	0.0744
616	77.82	125.43	6.89		492	0.294	-0.184	-0.792
616	77.95	124.39	6.37		492	0.25	0.0684	-0.548
616	79	123.93	7.58		492	0.179	-0.322	1.7
616	79.17	123.34	6.47		492	-0.00112	0.895	-0.702
616	79.12	122.11	4.65		492	-0.428	0.367	-0.0742
616	80.37	121.92	5.71		492	0.0569	0.0273	0.345
616	80.64	122.53	6.77		492	0.196	-0.224	0.156
616	81.84	121.21	5.54		492	-0.0133	0.272	-0.0697
616	83.14	121.19	5.21		492	-0.231	0.524	-0.426
616	88.87	118.64	3.94		492	0.28	-0.456	-0.844
616	90.1	119.34	3.86		492	0.111	0.471	1.02
616	92.58	120.51	3.46		492	-0.133	0.417	-0.0947
616	96.31	119.96	2.88		492	0.242	-0.482	0.311
616	96.78	120.31	4.07		492	0.387	-0.115	-0.458
616	98.04	120.27	4.91		492	-0.101	0.462	0.31
616	99.44	120.95	3.11		492	-0.686	0.127	-0.0991
616	98.44	121.27	3.23		492	0.562	0.163	-0.17
616	98.85	122.51	2.67		492	0.513	-0.277	-0.423
616	98.74	123.67	2.48		492	-0.478	0.353	-0.212
616	98.33	124.62	3.17		492	-0.616	-0.907	0.944
616	98.33	124.51	1.87		492	0.316	0.268	-0.564
616	97.7	124.48	5		492	0.642	-0.555	-1.87
616	98.32	125.78	2.43		492	0.0888	0.571	0.278
616	98.35	126.66	2.09		492	-0.0312	-0.14	0.559
616	100.02	128.66	1.98		492	0.135	0.558	-0.891
616	99.98	133.05	1.47		492	0.791	-0.0317	-0.524
616	101.53	134.66	6.25		492	-0.805	-0.335	1.14
616	100.18	136.68	3.44		492	0.22	0.114	-1.11
616	100.03	138.46	5.2		492	0.854	-0.0113	0.208
616	100.72	137.78	5.24		492	-1.3	0.854	1.06
616	100.79	137.44	5.61		492	-0.263	-0.284	-1.01
616	100.66	137.76	6.22		492	-0.187	-0.511	0.503
616	102.04	138.27	6.24		492	0.463	0.598	-0.155
616	101.82	138.17	6.96		492	0.106	0.0848	-0.442
693	10.18	212.89	22.19		492	-0.291	0.0648	1.06
693	9.87	211.99	23.01		492	-0.108	0.385	-1.93
693	10.09	212.38	22.78		492	-0.822	-0.0594	1.15
693	10.5	211.65	21.95		492	0.602	-0.171	-0.189
693	11.04	210.63	22.31		492	-0.636	0.623	0.192
693	11.67	209.78	24.41		492	0.462	-0.11	-0.0722
693	12.47	209.66	24.37		492	0.721	0.786	-1.55
693	13.15	210	25.97		492	-0.28	-0.175	0.872
693	13.78	210.24	24.08		492	0.0279	0.259	-1.02
693	13.94	209.75	23.5		492	-0.301	-0.0218	1.38
693	15.13	209.8	22.77		492	0.346	-0.0484	-0.261
693	13.88	209.72	21.39		492	-0.95	0.273	-0.06
693	14.47	209.21	20.19		492	0.0785	0.106	0.44
693	9.81	209.85	20.61		492	0.22	-0.17	-0.53
693	11.99	210.26	19.58		492	0.115	0.041	-0.169
693	10.76	209.98	20.46		492	-0.176	-0.557	1.11
693	7.7	205.12	18.52		492	-1.37	0.928	-0.958
693	8.8	208.73	20.4		492	0.0233	0.137	1.03
693	8.03	206.1	18.54		492	0.713	-0.503	-0.566
693	8.68	208.8	15.23		492	-0.701	0.806	-0.213
693	8.19	208.39	17.26		492	-0.375	0.689	-0.333
693	8.63	207.62	19.05		492	-0.0528	-0.831	0.534
693	8.72	206.64	14.19		492	-0.143	0.78	0.626
693	10.22	206.18	13.87		492	1.89	-1.31	-1.61
693	10.69	206.13	15.44		492	-0.811	0.667	0.337
693	9.33	206.95	16.21		492	-0.073	-0.046	0.608
693	10.34	206.56	15.97		492	0.473	0.107	-1.53
693	9.44	207.99	16.89		492	0.0638	-0.202	0.329
693	8.79	209.25	18.21		492	0.853	-0.352	1.13
693	8.79	209.47	19.27		492	0.62	0.0736	-2.25
693	8.09	209.76	20.68		492	-0.898	0.362	0.92
693	7.31	210.4	20.1		492	-0.384	-0.556	1.14
693	6.25	210.16	19.71		492	0.136	-0.0877	1.15
693	5.77	210.13	20.19		492	0.529	0.708	-2.37
693	5.86	210.42	21.01		615	0	0	0
693	5.78	210.41	20.59		615	192.78	103.55	33.94
693	7.15	211.94	21.04		615	0.804	-1.06	-1.62
693	5.19	209.98	21.38		615	0.0205	-0.668	0.401
693	4.43	209.55	21.55		615	0.271	-0.0398	-1.45
693	6.28	211.32	21.21		615	0.306	0.000447	0.519
693	3.84	209.09	21.11		615	0.428	0.509	-0.446
693	4.05	209.14	20.97		615	0.0617	-0.845	0.119
693	4.63	209.07	22.98		615	0.204	-0.836	-0.628
693	4.18	208.57	23.72		615	-0.656	-0.793	1.04
693	4.67	209.09	23.97		615	0.0152	-0.023	-0.701
693	5.81	207.94	25.07		615	0.41	0.00566	-0.284
693	5.88	208.29	21.89		615	-0.0713	-0.691	-0.382
693	5.19	208.46	22.71		615	0.0417	-0.335	1.14
693	6.53	208.64	22.98		615	-0.0337	0.013	0.135
693	7.53	207.65	25.82		615	-0.347	0.196	-0.518
693	6.78	207.55	24.32		615	-0.533	-1.54	1.79
693	7.46	207.96	23.1		615	0.691	1.19	-2
693	9.76	210.16	21.7		615	-3.55	3.37	-0.242
693	10.57	211.64	21.91		615	1.65	-1.25	0.294
693	11.44	211.82	21.1		615	-0.625	0.498	0.758
693	11.53	211.98	21.34		615	0.667	-0.538	-0.971
693	12.51	212.73	21.03		615	-0.0108	0.231	-1.07
693	12.29	212.58	21.29		615	-2.48	2.27	1.55
693	12.42	213.33	20.67		615	2.73	-1.58	-1.06
693	12.35	213.64	19.52		615	0.797	-0.994	-0.907
693	11.54	213.91	19.55		615	0.47	-0.499	-0.448
693	10.79	214.09	19.55		615	0.151	-0.209	1.18
693	11.15	214.34	20.48		615	0.21	0.195	-2.61
693	12.82	214.74	18.48		615	0.697	-1.52	1.59
693	12.25	214.79	19.64		615	-0.209	1.35	-0.438
693	12.65	214.52	19.99		615	0.782	-0.671	-0.27
693	12.87	214.53	20.7		615	-0.799	0.565	-0.201
693	13.71	213.94	22.24		615	0.337	-1.61	1.57
693	13.3	214.63	21.16		615	0.676	0.664	-1.13
693	12.66	216.02	18.7		615	-0.713	1.27	-1.66
693	12.48	216.56	20.84		615	0.467	-0.235	-0.68
693	12.64	215.83	20.07		615	-0.478	-0.918	1.91
693	12.89	216.05	20.7		615	-0.603	0.9	-0.998
693	13.12	215.08	20.19		615	-0.0927	0.399	-0.023
693	13.02	215.12	20.52		615	-0.388	0.586	0.223
693	14.99	211.82	20.56		615	-0.633	1.13	0.0503
753	7.09	243.39	9.51		615	-0.833	0.514	0.403
753	9.32	243.43	9.78		615	-0.754	0.612	1.73
753	10.83	238.59	10.43		615	0.155	-0.309	0.48
753	12.62	242.31	11.97		615	0.814	-1.27	-1.34
753	11.66	239.6	15.33		615	-0.842	1.43	1.58
753	12.1	243.24	8.71		615	-2.18	1.04	-1.23
753	15.39	245.58	11.08		615	-0.284	0.109	1.06
753	16.06	244.79	12.06		615	-0.192	-0.224	-0.261
753	16.59	244.83	12.92		615	3.37	-2.53	-0.326
753	15.8	244.34	11.81		615	0.102	0.914	-1.96
753	15.61	244.63	11.49		615	0.206	0.562	-0.368
753	14.79	244	9.89		615	0.395	0.395	-1.97
753	14.03	244.1	10.68		615	-1.67	1.29	0.495
753	13.66	245.53	10.55		615	1.09	0.544	-0.936
753	13.03	245.43	9.16		615	0.1	-0.142	0.0329
753	13.05	245.21	9.31		615	0.133	0.138	-1.73
753	12.39	244.77	8.15		615	-0.123	-0.117	3.47
753	10.63	242.95	12.19		615	0.0231	-0.109	-1.52
753	9.77	242.23	12.83		615	-0.42	0.439	0.411
753	12.04	244.34	11.76		615	-0.725	0.337	-1.72
753	14.12	245.86	9.5		615	0.337	0.45	1.55
753	15.64	246.13	11.56		615	-2.24	0.219	0.32
753	15.72	245.84	11.63		615	0.11	0.618	-0.775
753	15.57	246.34	11.52		615	1.55	0.353	-0.81
753	15.83	246.75	11.11		615	-2.79	1.12	0.647
753	15.67	247.54	11.38		615	1.62	0.133	-2.02
753	16.46	248.95	12.05		615	1.43	0.272	0.0313
753	16.71	248.92	12.5		615	0.724	-0.138	-0.86
753	17.27	248.88	10.28		615	-1.58	0.271	1.18
753	16.51	248.03	5.39		615	0.522	0.423	-0.241
753	17.63	245.67	6.4		615	0.17	-0.489	0.339
753	17.94	244.72	4.52		615	-1.29	-0.148	0.442
753	17.6	246.05	5.68		615	3.1	0.18	-2.87
753	17.3	246.73	6.63		615	0.325	0.51	-1.99
753	17.09	247.18	8.24		615	0.44	-0.215	0.816
753	15.62	247.72	6.3		615	-3.01	-0.835	3.02
753	15.01	247.47	6.43		615	2.97	1.05	-3.96
753	14.3	247.98	5.44		615	-0.917	-2.03	1.57
753	13.17	247.65	5.04		615	-0.288	0.375	0.148
753	13	248.09	5.61		615	0.273	-0.225	-0.825
753	16.5	249.88	12.36		615	-0.382	-1.02	0.958
753	16.57	248.96	12.44		615	-0.068	-0.0541	-0.21
753	15.62	247.81	11.61		615	-0.289	-0.579	1.1
753	13.92	246.05	9.53		615	0.388	-0.984	-1.33
753	14.03	244.71	9.85		615	1.64	5.13	-5.56
753	16.57	247.16	12.46		615	0.548	1.04	-2.29
753	16.44	243.47	12.52		615	-1.62	-3.92	5.33
753	16.75	240.92	9.94		615	0.681	3.34	-3.02
753	14.5	243.31	12.7		615	-0.369	-5.1	3.34
753	17.29	242.95	10.76		615	0.182	1.04	0.0895
753	16.87	243.88	10.93		615	-0.407	0.603	-1.01
753	15.92	244.96	12.67		615	-0.0708	-0.501	0.948
753	16.22	244.57	11.19		615	-0.103	-5.77	3.76
753	17.66	242.27	11.05		615	0.153	-0.435	1.51
753	17.39	242.84	11.1		615	0.182	0.453	-1.93
753	17.6	243.31	12.77		615	-0.667	0.781	0.666
753	17.64	242.29	11.27		615	0.552	4.86	-5.33
753	18.37	240.36	13.74		615	-1.2	-5.23	4.68
753	19.08	237.71	12.79		615	-0.0121	-0.141	1.19
809	7	189.14	11		615	0.963	0.105	0.158
809	3.81	194.38	14.38		615	0.732	0.114	-0.197
809	3.83	194.27	17.17		615	1.28	-0.319	-0.182
809	3.58	193.75	17.15		615	-0.00462	-0.341	0.458
809	4.95	193.96	16.66		615	1.27	-1.7	2.32
809	5.49	194.5	17.35		615	-0.166	-0.235	0.0252
809	5.31	194.75	16.25		615	0.566	0.101	-0.154
809	6.55	195.78	14.53		615	-0.369	0.451	1.81
809	9.22	196.68	15.61		615	0.885	-0.401	0.285
809	9.99	196.72	14.28		615	0.161	0.389	-1.09
809	12.21	197.05	15.15		615	0.235	-0.249	0.395
809	13.62	197.54	13.66		615	-0.952	1.25	-4.27
809	14.55	197.72	12.58		615	-0.299	-0.455	1.41
809	14.68	198.29	13.63		615	-0.16	-0.345	-1.89
809	16.83	198.05	12.26		615	0.371	-0.292	1.93
809	17.81	198.09	12.61		615	-0.00339	0.0649	1.37
809	19.22	198.46	10.83		615	-0.0621	-0.162	-0.667
809	20.38	198.45	11.47		615	0.28	0.403	-0.772
809	20.89	198.42	10.96		615	0.0878	-0.328	0.889
809	21.56	197.83	11.35		615	-0.115	-0.39	0.792
809	21.65	197.26	11.46		615	-0.181	0.214	0.717
809	20.92	196.94	11.32		700	0	0	0
809	22.35	195.64	11.1		700	215.67	113.75	15.22
809	23.27	195.87	10.71		700	0.744	0.672	-0.544
809	24.47	195.81	12.34		700	-0.335	-0.346	0.779
809	23.52	196.24	8.39		700	-0.0452	-0.0851	-1.23
809	25.2	196.66	11.54		700	-0.191	-0.645	0.544
809	25.27	197.47	10.34		700	0.602	-0.0992	-0.0573
809	26.46	197.66	12		700	-0.409	0.418	-1.75
809	26.37	197.96	9.66		700	-0.439	0.396	0.922
809	26.46	198.69	10.18		700	-0.0506	-0.282	0.449
809	27.02	200.25	8.8		700	0.878	0.141	0.318
809	26.54	199.22	8.86		700	-0.835	-0.0874	-0.36
809	26.07	200.46	7.9		700	0.285	0.15	-1.08
809	27.27	201.59	6.39		700	-0.203	-0.573	-1.07
809	28.43	201.09	6.9		700	0.0282	0.674	1.1
809	28.94	202.32	8.29		700	-0.119	-0.394	1.14
809	28.56	201.33	7.78		700	0.526	-0.0162	0.288
809	28.1	203.41	7.95		700	-0.25	0.885	0.0032
809	29.88	204.29	6.26		700	0.0748	-0.823	-0.907
809	32.25	205.46	3.99		700	0.437	-0.0383	0.0792
809	32.81	205.49	5.69		700	-0.733	0.0429	-1.29
809	33.77	205.78	6.19		700	0.174	-0.157	-0.122
809	36.47	205.72	5.81		700	-0.155	0.138	-0.327
809	37.66	206.64	6.58		700	0.204	0.283	0.794
809	38.17	206.51	6.74		700	0.543	-1.9	-0.565
809	38.53	206.47	7		700	-0.335	1.78	-0.174
809	38.58	206.54	8.89		700	-0.227	0.214	0.378
809	38.37	206.12	5.98		700	-0.265	-0.733	0.716
809	38.21	206.58	6.68		700	0.523	0.561	-1.18
809	38.49	206.04	5.45		700	0.347	-0.221	0.567
809	38.94	206.28	6.9		700	-0.323	-0.0801	0.606
809	40.17	207.44	9.61		700	-0.229	0.0479	-0.466
809	41.25	208.41	8.14		700	0.291	0.747	-1.76
809	38.2	206.53	5.92		700	-0.39	0.028	0.69
861	105.98	187.78	2.84		700	-0.452	0.249	0.995
861	106.91	187.9	3.99		700	0.0249	0.157	-1.13
861	105.69	187.28	2.34		700	0.577	-0.423	0.399
861	104.8	187.39	2.16		700	-0.93	0.262	0.0274
861	103.97	187.12	2.99		700	0.28	-0.038	-0.568
861	105.22	187.85	4.57		700	0.663	1.21	0.825
861	104.16	187.3	3.26		700	-0.907	-1.09	-2.13
861	104.48	187.46	4.05		700	0.229	-0.608	0.163
861	103.21	186.55	4.18		700	-0.15	0.281	-0.202
861	102.25	185.78	5.41		700	0.294	0.131	-0.248
861	101.4	185.34	7.01		700	-0.401	-0.257	-0.219
861	100.12	185.37	8.19		700	-0.158	-0.144	0.663
861	97.72	184.89	7.95		700	0.656	0.77	-0.913
861	96.9	189.77	8.4		700	-0.407	-0.231	0.294
861	95.62	185.02	8.49		700	-0.46	-1.04	0.314
861	96.38	186.52	8.2		700	-2.81	1.83	6.15
861	95.46	187.18	9.03		700	3.87	-0.705	-6.39
861	95.99	188.29	9.88		700	-0.573	0.227	0.371
861	94.32	188.98	10.53		700	-0.211	-0.363	-1.29
861	94.87	190.11	10.03		700	0.36	0.491	1.04
861	95.36	189.5	11.33		700	0.402	-0.182	-1.37
861	95.3	189.95	8.73		700	-1.1	-0.472	-0.0758
861	94.58	190.06	9.1		700	-0.416	0.245	0.206
861	95.35	189.29	7.65		700	0.618	-0.451	0.531
861	100.48	186.31	7.24		700	-1.42	-0.926	1.62
861	101.81	185.87	7.97		700	1.09	0.854	-2.53
861	102.59	186.29	5.3		700	-0.0123	0.513	0.407
861	104.84	188.59	3.58		700	0.148	0.0965	-1.75
861	105.11	190.21	4.81		700	-0.171	-0.649	0.527
861	107.52	194.67	4.38		700	-0.0826	0.441	0.323
861	106.94	195.4	5.1		700	0.529	0.702	0.133
861	106.24	196.48	5.72		700	-0.0928	-0.523	-0.713
861	105.57	196.93	4.18		700	0.0254	0.474	-0.263
861	106.21	197.61	4.79		700	0.515	0.0406	-0.447
861	106.62	198.46	4.47		700	-0.534	-0.617	1.18
861	107.04	198.4	4.61		700	-0.143	0.0672	-0.651
861	107.22	199.78	4.35		700	0.13	-0.484	0.257
861	107.2	202.19	2.46		700	-0.945	-0.204	0.939
861	107.02	201.89	4.06		700	0.73	0.0582	-0.514
861	105.54	201.1	2.45		700	-0.169	0.342	-0.989
861	106.13	202.08	2.87		700	-0.215	0.178	0.284
861	107.1	201.35	3.31		700	0.333	-0.287	-0.467
861	106.9	201.96	3.44		700	-0.179	0.255	-0.581
861	105.93	200.95	4.79		700	0.24	0.354	0.551
861	107.51	201.6	4.99		700	-0.248	-0.995	-0.0806
861	108.21	201.8	4.84		700	-0.0483	0.925	-0.241
861	108.42	201.9	4.86		700	0.299	-1.05	-0.00624
861	108.32	202.02	5.39		700	-0.567	0.658	-0.884
861	108.35	202.19	4.8		700	-0.332	-0.337	0.402
861	108.42	202.27	6.05		700	0.49	-0.351	0.871
861	108.09	201.65	5.91		776	0	0	0
901	217.7	62.02	13.21		776	100.2	154.91	9.15
901	217.69	61.12	14.51		776	5.94	-0.531	0.584
901	218.04	61.66	13		776	-6.48	-0.0763	-1.47
901	216.63	59.72	13.03		776	-0.465	-0.231	1.63
901	218.04	61.19	14.83		776	0.158	-0.0118	-0.66
901	216.82	59.78	14.04		776	0.189	0.373	-0.0764
901	216.14	59.42	13.62		776	-0.00535	-0.537	1.17
901	216.19	59.34	12.11		776	-0.241	-0.272	0.049
901	217.4	61.9	12.76		776	-0.272	-0.0918	-1.5
901	218.43	63.38	10.44		776	1.08	0.737	-0.0891
901	218.14	59.62	7.96		776	-0.433	-0.147	0.547
901	215.91	61.81	12.66		776	-0.24	-0.546	-0.377
901	217.54	61.51	11.86		776	0.347	-0.585	-0.689
901	216.53	61.36	11.15		776	6.3	0.618	-1.03
901	216.98	60.77	11.21		776	-0.465	0.305	0.936
901	216.59	62.29	11.54		776	-6.48	-0.263	0.155
901	217.21	62.7	11.56		776	0.622	-0.0224	0.153
901	217.49	62.7	11.8		776	0.382	0.696	0.59
901	216.81	62.46	10.49		776	-0.55	0.0619	0.0209
901	216.55	61.59	9.49		776	1.69	-0.352	-2.03
901	217.85	62.62	11.79		776	0.491	-0.263	-0.183
901	217.59	62.07	11.81		776	-0.945	-0.218	0.269
901	217.44	62.7	10.48		776	0.951	0.244	-1.31
901	217.54	62.77	11.71		776	-0.653	-0.126	2.19
901	217.39	63.2	12.02		776	-1.82	-0.125	-0.601
901	219.21	63.54	12.78		776	-0.523	-0.173	-0.115
901	218.54	62.32	12.17		776	0.384	-0.0302	0.293
901	220	61.95	12.33		776	-1.67	-0.428	-0.304
901	216.9	64.24	11.57		776	-0.263	0.148	-0.845
901	220.16	61.8	12.54		776	-0.68	0.274	-0.123
901	220.67	61.75	13.88		776	-1.22	0.0718	0.602
901	216.93	60.42	11.12		776	-0.383	-0.517	-1.21
901	220.39	62.13	11.89		776	-0.755	-0.302	0.192
901	220.01	61.97	12.13		776	-0.915	-0.4	-0.0817
901	220.78	60.13	11.94		776	-0.732	0.182	-1.2
901	219.51	61.59	12.39		776	-0.108	0.0253	0.995
901	219.77	60.98	11.59		776	2.67	-0.122	0.253
901	218.66	62.01	11.57		776	-3.12	0.315	-0.896
901	219.82	62.59	12.22		776	1.17	-0.212	0.0256
939	200.63	21.57	28.05		776	0.643	-0.271	-0.0493
939	199.08	23.49	26.42		776	-0.704	0.305	0.408
939	199.4	22.72	25.57		776	-0.0942	0.0508	0.127
939	197.18	21.32	26.85		776	0.237	-0.292	-0.143
939	195.9	21.68	24.98		776	-0.473	0.327	-0.0197
939	196.43	21.68	22.53		776	-0.356	-0.307	-0.151
939	193.4	22.54	21.73		776	0.38	-0.0114	-1.02
939	192.19	25	17.88		776	-1.27	0.123	0.763
939	192.13	26.32	16.99		776	0.79	-0.154	-0.662
939	191.76	30.8	21.49		776	0.63	-0.024	1.51
939	191.39	31.4	23.77		776	-0.176	-0.318	-0.248
939	191.31	30.8	23.82		776	0.321	-0.0107	-0.815
939	191.98	30.49	23.68		776	-0.512	0.38	0.552
939	191.76	31.52	19.8		776	-0.277	0.0259	-1.07
939	191.95	31.79	21.55		776	0.0149	-0.719	-0.74
939	192.49	31.96	20.08		776	0.163	-0.109	0.653
939	193.82	31.78	17.93		776	-0.379	0.0921	2.57
939	193.75	31.68	16.65		776	-0.366	0.169	-1.94
939	194.26	32.16	15.47		776	0.445	-0.409	-1.42
939	195.05	32.78	15.6		776	-1.05	0.57	2.01
939	195.28	32.39	14.74		776	0.534	-0.783	-1.23
939	195.68	33.05	14.48		776	-0.268	0.326	-0.503
939	195.56	31.98	12.88		776	-0.557	0.324	1.65
939	192.31	26.04	16.12		776	0.735	-0.0386	-1.21
939	189.98	25.41	16.24		776	0.798	-0.266	-1.17
939	188.82	24.66	16.6		776	-0.541	-0.387	0.325
939	188.8	24.99	16		776	0.0187	0.277	1.41
939	187.75	24.08	14.81		776	1.26	0.614	0.0761
939	186.7	22.09	16.49		776	-0.25	-0.675	-0.237
939	185.89	21.33	17		776	-0.247	1.59	-0.525
939	184.88	21.22	16.09		776	0.828	-0.977	-0.0699
939	183.14	18.89	16.47		776	0.404	0.152	1.67
939	184.25	18.57	17.11		776	-0.516	-0.939	-0.2
939	183.1	17.37	17.85		776	-0.0207	0.734	-1.27
939	183.38	15.27	18.92		776	-0.519	-0.109	-0.0311
939	184.16	15.19	20.84		825	0	0	0
939	184.32	15.26	18.94		825	74.31	85.43	9.78
966	133.36	155.54	4.2		825	0.386	0.0026	-0.396
966	129.81	157.91	4.78		825	-0.418	-0.325	-0.631
966	127.16	159.49	5.08		825	0.881	1.28	0.25
966	127.51	161.09	5.31		825	-0.889	-1.72	-1.01
966	127.63	162.15	2.79		825	1.1	1.36	-0.376
966	127.13	163.54	3.49		825	-0.145	-0.0413	0.389
966	126.89	163.31	3.44		825	-0.588	0.711	-0.0794
966	126.1	165.36	4.03		825	-0.771	1.47	2.06
966	127	164	5.61		825	0.455	-1.64	-0.901
966	127.01	163.91	3.64		825	0.174	0.0806	-1.07
966	126.33	163.73	3.45		825	-0.041	-0.471	-0.756
966	126.45	164.15	4.43		825	0.353	1.65	-0.212
966	125.44	164.31	4.92		825	-0.456	-0.699	1.74
966	126.46	164.52	5.41		825	1.68	-0.0662	1.63
966	125.51	164.28	5.29		825	-2.44	-0.336	-2.62
966	126.68	164.27	8.74		825	0.231	0.966	1.96
966	124.32	163.1	4.85		825	0.0954	-0.392	-2.07
966	122.92	162.82	4.9		825	-0.309	-0.504	-0.731
966	122.27	162.38	5.49		825	0.122	0.185	-0.118
966	122.82	163.24	5.36		825	0.229	0.645	0.383
966	120.44	164.02	3.55		825	-0.512	-0.33	0.0582
966	120.63	163.59	4.41		825	0.13	-0.0781	-0.661
966	120.99	163.68	5.42		825	0.485	0.789	1.23
966	117.47	165.77	5.99		825	-0.125	-0.386	-0.267
966	117.33	166.72	5.04		825	-0.597	0.685	-1.13
966	115.56	168.83	5.34		825	-0.367	-0.621	-0.0165
991	0.952	218.26	9.89		825	0.242	0.312	0.886
991	1.27	218.55	10.02		825	0.344	-0.153	-0.267
991	1.62	218.7	8.89		825	0.377	0.0252	-0.643
991	1.38	219.4	7.58		825	-0.585	0.621	-0.645
991	1.23	219.38	8.54		825	0.0177	-0.02	0.826
991	1.37	220.24	6.69		825	-0.407	-0.126	-0.874
991	1.41	221.42	5.51		825	0.23	0.346	1.64
991	1.57	221.22	4.39		825	-0.103	0.182	-1.32
991	1.54	221.44	4.34		825	0.0498	0.178	0.814
991	1.52	220.89	3.26		825	0.536	0.301	0.455
991	1.31	221.97	4.26		825	-1.18	0.202	-0.59
991	1.27	223.06	4.24		825	1.14	-0.24	-0.29
991	1.31	223.06	4.24		825	0.263	0.235	-1.17
991	0.997	223.69	4.52		825	-0.152	0.481	1.82
991	1.09	224.43	4.86		825	0.605	-1.04	-1.48
991	1.14	223.69	5.15		825	-0.757	0.889	1.81
991	1.09	223.68	5.58		825	0.183	-0.0733	-1.16
991	0.992	225.82	6.18		825	-0.00448	-0.484	-0.0276
991	1.43	225.87	9.13		825	-0.886	-1.19	0.000309
991	1.44	226.07	10.51		825	0.765	0.237	-0.101
991	3.13	226.39	10.73		871	0	0	0
991	3.25	226.55	11.68		871	162.22	34.46	7.9
991	5.41	227.19	13.76		871	0.0597	-0.599	0.783
991	6.85	227.87	14.46		871	-0.593	0.0939	-1.6
1015	61.56	192.15	4.76		871	0.19	0.268	1.37
1015	61.79	190.61	6.54		871	0.138	-0.232	-1.35
1015	56.97	186.03	5.48		871	-0.299	-0.0965	0.972
1015	55.3	184.82	5.23		871	0.314	-0.175	-0.00675
1015	53.68	183.63	4.7		871	0.042	0.0684	-1.36
1015	53.19	184.74	3.85		871	0.0617	0.041	-0.57
1015	53.41	183.45	4.76		871	0.0763	-0.302	1.95
1015	53.85	182.65	5.1		871	-0.446	0.0703	-0.47
1015	54.47	182.81	4.75		871	0.361	-0.379	0.273
1015	54.79	184.59	4.36		871	-0.194	0.748	-1.39
1015	54.21	183.58	5.14		871	-0.0904	-0.0361	-0.323
1015	54.25	184.46	4.78		871	-0.246	0.428	-0.21
1015	53.94	183.68	5.04		871	0.288	-0.174	0.543
1015	53.03	184.25	5.21		871	0.236	-0.125	-0.397
1015	54.37	182.87	6.1		871	-0.207	0.127	-0.654
1015	52.51	182.99	6.08		871	-0.208	0.11	1.18
1015	53.79	181.62	6.17		871	-0.362	0.0384	-1.21
1015	53.96	180.87	5.95		871	-0.232	0.154	-0.442
1015	55.08	180.09	7.56		871	-0.204	-0.324	0.188
1015	54.96	179.61	8.61		871	0.152	0.0924	0.408
1015	56.38	179.57	8.98		871	-0.127	0.207	-0.273
1015	58.12	178.96	11.57		871	-0.145	0.168	1.17
1015	58.3	179.01	11.34		871	-0.156	0.14	-0.0177
1037	57.36	206.59	11.68		871	0.147	0.11	-1.47
1037	60.52	204.57	11.64		871	-0.022	0.194	0.25
1037	60.97	204.53	11.08		871	-0.0934	-0.502	0.371
1037	60.33	204.61	11.1		871	0.131	0.177	-1.14
1037	60.85	204.38	11.23		871	-0.275	0.0676	1.03
1037	61.44	203.65	10.9		871	-0.143	0.119	0.539
1037	60.93	204.28	11.11		871	0.277	0.111	-2.14
1037	61.13	203.86	11.64		871	-0.414	0.36	0.217
1037	60.49	204.27	11.79		871	0.0539	-0.388	-0.386
1037	66.83	202.09	11.21		871	0.0931	-0.294	-0.0678
1037	62.5	204.71	12.91		871	0.125	0.124	0.423
1037	61.37	208.89	13.69		871	-0.16	-0.0786	0.347
1037	61.53	204.87	13.1		871	-0.0439	0.435	-0.278
1037	63.27	203.21	13.65		871	-0.337	0.0522	-0.813
1037	62.79	202.21	11.74		871	-0.0664	-0.0715	0.226
1037	62.59	202.82	12.6		871	0.0602	0.524	0.202
1037	61.59	201.73	12.7		871	0.143	0.0723	-0.131
1037	60.62	202.41	13.8		871	0.247	-0.0468	0.885
1037	60.98	201.61	13.98		912	0	0	0
1037	61.18	201.12	13.65		912	123.2	128.17	2.63
1037	62.03	200.77	13.08		912	-0.0268	-0.534	0.725
1059	37.89	98.5	19.79		912	-0.152	0.287	-1.41
1059	36.07	99.66	17.71		912	0.129	-0.999	0.133
1059	35.9	99.45	16.51		912	-0.636	1.58	0.495
1059	38.8	99.48	18.67		912	-0.236	0.193	-0.474
1059	35.99	98.88	16.42		912	-3.86	0.78	-0.33
1059	36.59	99.72	18.11		912	5.14	-1.78	0.115
1059	37.66	98.98	17.43		912	-0.375	0.543	-0.0383
1059	37.68	99.42	14.02		912	0.059	-0.379	-0.219
1059	35.95	99.3	15.95		912	0.31	0.696	0.00338
1059	35.61	101.24	17.29		912	-0.801	0.509	-0.108
1059	37.15	99.68	18.3		912	-0.197	-1.31	0.556
1059	38.67	97.65	18.23		912	-0.0735	0.653	0.211
1059	38.15	97.26	15.29		912	0.305	-0.354	-0.218
1059	38.34	96.16	19.34		912	-0.0748	-0.548	-0.97
1059	37.37	95.53	13.77		912	-0.567	0.684	-0.0965
1059	38.46	96.52	15.91		912	0.104	0.469	0.0849
1059	38.17	96.19	14.72		912	0.372	-0.191	0.582
1059	37.25	97.98	15.92		912	-0.00946	0.195	-0.801
1059	36.75	97.95	14.86		912	-0.131	-0.315	0.977
1059	36.68	97.97	16.99		912	-0.319	0.484	0.164
1059	37.35	99.08	18.38		912	-0.276	0.172	0.124
1079	151.68	102.46	11.63		912	-0.0341	-0.34	-0.428
1079	149.08	103.43	10.48		912	-0.109	0.584	0.738
1079	151.4	103.08	12.53		912	0.13	-0.348	-0.592
1079	151.22	102.82	11.05		912	0.0214	0.104	0.84
1079	151.91	102.69	10.52		912	-0.166	0.688	-0.779
1079	151.49	102.35	8.42		912	-0.0781	0.377	0.0914
1079	152.85	102.91	11.93		912	0.0206	-0.0648	0.0976
1079	152.24	102.68	11.38		912	0.293	0.402	-0.248
1079	151.01	103.15	9.85		912	0.803	0.555	0.256
1079	151.62	103.23	10.02		912	-0.219	-0.189	-0.416
1079	150.04	102.52	11.72		912	-0.277	-0.189	0.0982
1079	150.36	102.49	11.9		912	-0.0735	-0.584	0.0831
1079	149.44	102.6	10.09		912	-0.419	0.477	-0.48
1079	149.57	103.45	10.77		912	0.25	-0.174	0.232
1079	149.5	103.68	9.84		912	-0.358	-0.277	0.78
1079	150.03	103.44	11.79		912	0.204	-0.0271	-0.61
1079	151.12	103.03	10.7		953	0	0	0
1079	150.3	102.66	10.65		953	61.38	171.17	17.7
1079	150.01	103.56	10.63		953	-1.27	-0.226	2.05
1098	181.4	171.05	4.25		953	0.784	-0.871	-1.21
1098	182.95	172.74	3.98		953	-0.532	-0.399	0.328
1098	182.58	172.62	4.34		953	4.28	0.77	1.4
1098	183.82	172.14	4.22		953	-3.6	-0.0059	-2.64
1098	183.72	171.61	4.08		953	0.0976	-0.0823	2.86
1098	184.22	171.53	5.48		953	3.29	0.99	-2.56
1098	184.43	170.47	5.32		953	-0.113	1.01	0.319
1098	184.78	171.97	6.39		953	0.955	1.79	0.346
1098	185.43	171.32	6.38		953	-0.404	-1.09	-0.618
1098	184.88	172.24	6.79		953	-1.32	-0.462	0.779
1098	185.25	168.71	7.26		953	0.511	-1.03	-2.16
1098	183.07	173.04	6.54		953	0.544	-0.242	1.09
1098	182.37	174.94	7.66		953	-0.253	0.806	0.164
1098	181.75	178.65	9.22		953	0.98	0.461	-2.45
1098	182.75	180.05	8.84		953	0.217	0.0428	2.04
1098	183.78	179.15	7.99		953	-0.095	-1.01	-1.56
1098	184.1	178.53	9.18		953	0.546	-0.138	-1
1098	185.18	177.4	8.73		953	0.0582	-0.423	-0.00302
1113	37.97	37.56	8.02		953	-0.571	-0.218	0.329
1113	35.6	34.51	10.24		953	0.469	0.845	-2.03
1113	34.92	33.63	11.64		953	-0.678	-1.08	1.18
1113	35.29	33.68	11.91		953	1.36	1.26	-0.743
1113	35.14	33.48	12.94		953	-0.143	0.659	-2.02
1113	33.84	32.29	14.73		953	-0.038	-0.386	-0.251
1113	33.95	32.32	13.81		953	1.14	0.687	-0.0903
1113	33.47	31.23	14.73		953	-0.148	0.00127	-1.46
1113	33.52	32.34	12.17		953	-0.374	-0.292	1.71
1113	34.12	34.23	12.09		953	-0.899	-0.0331	-1.4
1113	33.62	32.43	12.52		953	-0.0324	-1.42	1.31
1113	34.01	32.45	12.22		953	-1.63	0.171	-0.148
1113	34.12	31.55	12.64		953	-0.211	-0.082	0.428
1113	34.13	32.34	13.79		953	0.925	0.904	-2.47
1128	67.24	103.05	6.98		953	1.64	1.01	-4.08
1128	66.43	102.59	7.64		953	-1.32	-0.387	0.203
1128	70.18	100.89	13.04		953	-2.96	-1.59	4.68
1128	66.9	102.14	6.82		953	2.59	0.986	-2
1128	66.54	102.15	6.39		953	1.66	0.504	-5
1128	66.02	101.31	4.26		987	0	0	0
1128	65.76	100.73	7.2		987	179.59	28.93	7.13
1128	65.89	101.76	4.99		987	-0.142	0.29	0.805
1128	65.53	101.21	6.42		987	0.277	0.385	0.149
1128	65.9	101.32	6.42		987	-0.37	0.985	-1.91
1128	65.72	101.61	7.63		987	-0.315	-0.0165	0.64
1128	66.57	102.54	7.85		987	0.0491	0.132	-0.248
1128	66.8	102.44	7.67		987	0.174	-0.298	0.22
1128	67.23	102.13	6.51		987	-0.672	0.724	-1.39
1143	201.61	37.37	8.88		987	1.01	-1.35	1.45
1143	203.32	37.3	10.24		987	0.351	-1.6	0.112
1143	204.55	38.39	7.44		987	0.0195	0.98	-0.332
1143	206.2	38.31	6.39		987	0.596	-0.885	-0.644
1143	207.39	39.13	6.18		987	0.275	0.0757	-0.51
1143	207.86	39.47	4.59		987	-0.369	0.122	1.14
1143	208.66	40.32	5.24		987	0.384	-0.959	-0.758
1143	209.3	41.45	4.54		987	0.349	-0.612	0.0247
1143	211.39	41.91	4.92		987	1.01	-0.364	-0.278
1143	212.08	42.9	4.03		987	-0.447	0.917	0.389
1143	213.78	43.78	5.27		987	0.934	0.889	-0.463
1143	215.14	45.74	4.51		987	-0.545	1.09	-0.000277
1143	218.8	48.54	3.89		987	-0.0983	0.853	-1.58
1143	215.47	48.1	3.76		987	-0.928	-0.111	1.27
1157	84.07	107.22	35.94		987	-0.604	0.293	-1.35
1157	87.18	108.4	37.19		987	0.543	0.465	-0.536
1157	89.02	109.85	37.01		987	0.904	-0.581	0.805
1157	88.46	109.59	34.48		987	0.662	0.363	0.597
1157	89.3	110.02	38.03		987	-0.444	-0.381	-0.521
1157	91.17	109.82	37.52		987	-0.181	-0.231	0.778
1157	89.78	109.98	33.95		987	0.46	0.192	-0.954
1157	91.67	110.28	37.76		987	-0.716	0.592	0.49
1157	92.02	110.25	37.73		987	-0.5	-0.444	-0.825
1157	93.39	111.97	38.74		987	-0.828	0.501	-0.194
1157	92.33	112.15	37.77		1016	0	0	0
1157	93.08	112.36	36.51		1016	196.69	195.3	1.63
1157	92.98	110.63	36.36		1016	5.6	-2.39	-0.00791
1170	73.24	121.96	3.98		1016	0.716	-0.168	0.138
1170	76.25	122.16	5.25		1016	0.175	0.715	0.142
1170	74.56	121.9	4.87		1016	-2.02	0.403	-0.423
1170	76.41	121.73	4.41		1016	-0.226	0.541	0.438
1170	75.74	122.51	3.92		1016	0.394	0.12	-0.288
1170	76.4	122.13	4.56		1016	-0.515	0.481	0.0743
1170	77.17	122.3	6.28		1016	-2.29	0.938	-0.378
1170	78.18	125.74	4.4		1016	3.72	-0.372	-0.577
1170	78.92	125.11	4.59		1016	-0.267	0.21	0.49
1170	77.29	124.23	4.37		1016	-0.0177	-0.704	0.412
1170	79.91	123.64	4.54		1016	0.363	-0.0873	-0.0271
1170	76.01	123.71	5.76		1016	-0.825	-0.0407	0.283
1183	157.8	137.58	5.99		1016	0.317	-0.199	0.0211
1183	158.47	138.02	5.23		1016	-0.56	0.459	-0.489
1183	158.98	138.36	6.01		1016	-0.717	-0.633	-0.439
1183	158.63	136.96	6.76		1016	0.86	-0.431	0.755
1183	159.9	134.61	8.75		1016	-0.812	1.39	-0.592
1183	158.15	133.47	5.73		1016	0.482	-0.38	0.447
1183	155.44	134.82	9.14		1016	1.05	0.64	0.273
1183	154.53	134.31	6.47		1016	0.721	-0.132	0.263
1183	152.78	134.86	9.5		1016	-0.735	-0.606	-0.467
1183	151.07	132.82	9.03		1016	0.161	-0.0861	0.0183
1183	151.97	133.02	8.01		1016	-0.0383	-0.472	-0.0104
1183	151.4	132.47	7		1016	0.594	-0.0219	0.391
1196	230.08	103.29	17.49		1016	-0.149	0.531	-0.0648
1196	228.67	100.51	17.6		1041	0	0	0
1196	228.67	101.01	17.43		1041	231.88	132.61	15.16
1196	228.97	102.04	18.13		1041	-0.381	-0.533	-1.17
1196	228.11	100.76	18.75		1041	0.447	-0.74	1.63
1196	226.67	102.04	17.1		1041	-0.299	-0.215	-0.2
1196	226.7	100.94	17.62		1041	0.438	-0.00963	-1.74
1196	224.87	104.54	20.04		1041	-0.672	-0.887	1.48
1196	224.81	105.18	22.35		1041	-0.033	1.03	1.07
1196	224.98	106.39	20.38		1041	-0.236	-1.06	0.245
1196	224.39	107.69	18.24		1041	0.383	0.225	-1.4
1196	226.04	107.98	20.22		1041	-0.146	-1.42	0.945
1208	15.78	165.16	5.78		1041	0.448	1.86	0.331
1208	15.92	164.89	6.58		1041	-0.325	-0.188	-0.573
1208	15.62	163.29	4.38		1041	0.0112	0.167	-0.153
1208	17.85	164.28	7.22		1041	0.00848	0.788	0.186
1208	17.41	163.84	5.3		1041	0.441	-0.218	-1.65
1208	15.84	163.61	6.47		1041	-0.0764	0.571	-0.686
1208	16.6	162.76	4.97		1041	-0.262	0.797	-0.148
1208	15.89	162.89	7.51		1041	0.379	-0.653	-0.00233
1208	17.4	163.2	6.13		1041	0.222	0.583	0.755
1208	16.77	163.05	5		1041	0.485	0.179	-0.358
1208	16.9	162.86	7.67		1041	-0.717	-0.113	0.148
1219	166.15	154.96	2.29		1041	0.409	0.518	0.318
1219	166.43	154.2	1.82		1041	0.0329	0.529	-1.16
1219	165.9	153.98	2.6		1065	0	0	0
1219	165.32	152.92	2.8		1065	231.88	115.34	9.68
1219	165.37	156.18	1.35		1065	3.36	0.813	1.07
1219	165.56	157.5	1.24		1065	-4.29	-1.98	-2.63
1219	165.81	157.4	1.46		1065	-0.477	-0.111	-0.0815
1219	169.57	160.65	2.38		1065	1.65	0.213	-0.179
1219	166.56	159.05	1.92		1065	-2.35	-0.249	0.633
1219	167.4	159.64	2.07		1065	0.392	0.542	-0.998
1230	82.12	252.03	12.83		1065	0.317	0.855	0.511
1230	82.9	251.14	10.37		1065	-2.32	-0.335	-0.154
1230	82.83	251.12	8.3		1065	2.21	-0.184	0.609
1230	82.24	251.12	7.56		1065	0.181	-0.404	-0.664
1230	82.28	251.88	7.84		1065	0.354	0.564	0.106
1230	81.77	250.53	8.07		1065	-0.41	-0.0992	-0.994
1230	81.68	250.97	7.68		1065	1.66	-0.397	-0.493
1230	81.86	250.14	7.61		1065	-1.75	0.0821	0.52
1230	81.59	250.62	8.41		1065	0.554	0.588	0.766
1230	81.16	249.45	8.28		1065	0.0792	0.123	-0.867
1241	124.41	134.98	15.08		1065	-1.19	-0.747	2.46
1241	127.01	134.29	13.92		1065	0.589	-0.0985	-2.45
1241	125.24	140.33	14.28		1065	-0.42	0.507	-0.597
1241	126.43	138.55	14.23		1065	0.316	-0.145	0.713
1241	127.55	136.56	15.38		1065	0.56	-0.196	-0.594
1241	126.66	136.01	16.59		1089	0	0	0
1241	126.78	133.81	17.52		1089	194.91	110.71	10.51
1241	127.33	133.66	19.42		1089	1.01	0.132	0.015
1241	128.72	133.36	19.69		1089	0.322	-0.0522	-1.26
1241	129.34	132.36	23.74		1089	0.0572	-0.291	0.475
1251	150.88	186.75	6.83		1089	0.148	0.255	-0.0803
1251	149.07	186.56	12.64		1089	0.333	-0.174	-0.395
1251	151.11	186.72	8.82		1089	0.774	-0.0995	0.393
1251	151.24	186.85	10.61		1089	0.0833	-0.0182	-1.49
1251	150.72	185.82	9.2		1089	0.172	-0.106	1.11
1251	149.81	185.91	13.52		1089	0.358	-0.0334	-0.0166
1251	149.38	187.61	11.91		1089	0.293	0.0458	-1.34
1251	148.28	186.51	9.35		1089	0.214	0.195	0.147
1251	151.42	187.43	10.29		1089	0.166	-0.133	-0.0706
1261	42.96	223.9	7.44		1089	-0.375	-0.374	0.413
1261	46.02	228.22	9.19		1089	0.508	0.0367	-0.339
1261	44.81	228.5	9.67		1089	-0.25	-0.0199	-0.559
1261	45.31	230.6	9.63		1089	-0.174	-0.263	0.789
1261	43.71	235.94	8.87		1089	1.8	0.383	-1.75
1261	45.93	231.29	9.41		1089	-0.0158	0.0653	0.659
1261	46.48	230.41	9.5		1089	-0.558	-0.447	-1.19
1261	45.52	229.2	9.81		1089	0.588	0.492	0.563
1261	44.3	231.44	8.17		1089	0.134	-0.126	-0.15
1270	205.85	136.17	17.63		1110	0	0	0
1270	204.53	137.72	16.84		1110	236.13	39.94	33.95
1270	202.74	139.23	14.83		1110	0.39	1.32	0.098
1270	202.75	139.91	15.73		1110	0.449	-1.05	1.1
1270	202.83	141.99	15.76		1110	0.879	-1.05	-4.7
1270	202.26	139.23	19.18		1110	-1.27	-0.36	3.14
1270	201.38	138.92	25		1110	0.582	1.37	-1.58
1270	203.91	140.27	30.19		1110	0.632	1.17	1.32
1277	125.57	30.22	11.26		1110	-0.545	-0.358	0.736
1277	126.93	28.91	9.2		1110	0.399	2.02	-2.86
1277	126.44	28.29	10.95		1110	-1.56	-2.35	1.43
1277	125.77	26.6	10.1		1110	-0.0788	-1.32	-1.63
1277	125	25.68	10.47		1110	1.82	-0.496	0.278
1277	125.92	25.37	8.74		1110	-0.977	2.33	-5.43
1283	67.9	169.34	8.37		1110	-0.28	-0.961	7.17
1283	68.9	169.06	9.38		1110	0.693	0.391	-2.34
1283	69.54	171.11	10.08		1110	-1.18	-0.367	0.472
1283	71.21	171.66	9.69		1110	0.79	0.251	1.78
1283	70.63	176.4	9.14		1110	0.445	0.000965	1.04
1289	157.72	198.69	12.97		1110	-0.46	-0.142	-1.41
1289	160.47	199.52	16.7		1130	0	0	0
1289	160.78	196.13	15.21		1130	165.77	155.69	1.9
1289	163.26	195.81	15.6		1130	0.0957	0.949	-0.724
1289	163.42	195.98	12.24		1130	0.0118	0.175	0.672
1295	230.19	92.13	14.71		1130	-0.0107	0.235	-0.456
1295	230.25	94.84	14.35		1130	0.489	0.187	3.91
1295	231.53	95.96	11.16		1130	-0.379	-0.404	-3.85
1295	232.04	97.11	11.47		1130	0.0196	0.863	1.62
1295	232.72	95.84	11.87		1130	-0.612	-1.17	-1.2
1301	128.25	228.8	26.26		1130	0.0451	0.00601	-0.5
1301	129.42	230.33	22.71		1130	-0.128	2.07	3.28
1301	128.38	231.55	24.44		1130	0.556	-1.73	-3.05
1301	127.13	231.03	24.46		1130	-0.304	0.896	1.21
1301	127.43	229.59	23.69		1130	0.841	-1.37	0.419
1305	177.36	20.99	13.17		1130	0.00936	1.67	0.47
1305	176.67	23.04	9.83		1130	-0.154	0.143	-2.1
1305	176.5	25.18	7.26		1130	0.715	0.175	0.887
1309	2.17	69.93	11.02		1130	-0.554	-0.551	0.961
1309	2.94	70.82	16.43		1130	0.933	-0.327	0.853
1309	1.83	67.61	13.44		1149	0	0	0
1313	106.69	91.41	3.38		1149	140.69	127.28	3.69
1313	109.35	89.18	4.04		1149	0.394	-0.332	0.0231
1313	106.46	91.36	2.05		1149	0.912	1.16	1.73
1317	37.08	40.92	10.64		1149	-1.22	0.982	-1.38
1317	37.86	40.59	9.48		1149	-0.794	-0.584	0.627
1317	38.77	38.84	8.65		1149	-0.0273	-0.124	-0.174
1320	16.77	251	7.46		1149	-0.313	-0.46	-0.304
1320	17.19	251.86	5.05		1149	-0.184	0.0175	-0.575
1323	212.49	128.99	10		1149	-0.13	0.43	-0.478
1323	212.33	125.81	16.9		1149	0.158	0.919	-0.674
1326	115.95	222.96	19.16		1149	0.617	0.21	1.82
1326	115.83	225.18	19		1149	-0.613	1.85	-1.75
1329	2.46	0.952	28.89		1149	-0.254	-2.72	1.61
1329	2.1	1	26.23		1149	-1.32	0.647	-1.7
1332	248.26	84.61	25.75		1149	2.15	-1.41	-0.87
1332	246.77	87.66	27.77		1149	-0.321	1.67	1.46
1343	80.51	198.29	5.22		1149	1.3	-0.535	0.0326
1343	80.1	199.37	5.54		1164	0	0	0
1343	75.97	198.39	2.53		1164	180.17	165.96	7.16
1343	78.46	199.67	6.6		1164	0.826	-1.62	-1.2
1343	78.95	198.08	4.15		1164	0.229	2	0.229
1343	80.74	198.71	4.69		1164	0.0219	0.198	1.36
1343	77.66	197.93	5.77		1164	-0.254	-1.12	-0.611
1343	79.2	198.66	3.92		1164	0.57	0.0659	0.133
1343	77.8	198.52	4.75		1164	0.623	1.01	-0.38
1343	71.06	196.98	3.55		1164	-0.415	0.166	-1.06
1382	134.38	65.99	3.37		1164	-0.115	-2.22	-0.419
1382	134.32	65.95	4.05		1164	-0.12	2.11	0.6
1382	135.08	62.21	11.02		1164	1.15	-0.12	-1.68
1382	135.85	62.02	9.55		1164	-0.0658	-0.825	1.2
1382	135.76	61.46	10.73		1164	-0.797	1.73	0.733
1382	136.57	62.68	7.74		1178	0	0	0
1382	135.61	60.89	12.35		1178	207.45	120.04	23.54
1382	135.88	59.61	14.23		1178	-0.894	0.224	-1.12
1382	136.52	59.16	15.9		1178	0.702	-0.0745	1.94
1382	136.04	60.06	10.8		1178	0.847	-1.39	-1.33
1382	136.49	59.36	12.76		1178	-1.05	1.24	-0.939
1382	136.78	59.15	10.51		1178	-0.39	-0.341	0.441
1382	136.55	59.03	12.57		1178	0.602	0.804	1.5
1382	135.92	58.64	14.92		1178	0.0929	-0.587	-1.13
1382	135.83	58.76	15.8		1178	-0.0126	0.381	-1.12
1382	135.69	58.77	14.5		1178	0.355	-0.111	0.748
1382	135.12	58.67	14.07		1178	-0.0211	-0.416	-3.06
1382	134.48	57.84	14.71		1178	-0.203	0.221	1.58
1382	133.97	56.75	13.59		1191	0	0	0
1382	134.34	56.97	15.47		1191	165.6	64.54	17.21
1382	134.09	56.07	13.28		1191	-0.616	0.208	-1.17
1382	133.75	54.54	12.33		1191	1.2	1.27	1.68
1382	134.59	56.85	15.61		1191	0.439	-1.18	-0.0947
1382	134.72	58.07	16.17		1191	-0.0183	0.61	-1.11
1382	135.26	56.16	14.66		1191	0.411	-0.82	0.543
1382	135.3	58.07	15.69		1191	-1.08	0.103	0.843
1382	134.62	59.65	14.8		1191	1.11	-0.515	-2.14
1382	134.61	61.44	15.95		1191	-0.136	0.705	2.1
1382	134.13	62.05	15.48		1191	-0.107	-0.0971	-1.34
1382	130.29	61.19	15		1191	-0.56	-0.624	-0.322
1382	130.65	61.7	16.7		1201	0	0	0
1382	130.33	60.7	14.47		1201	152.07	161.89	7.01
1382	130.16	60.86	12.89		1201	0.113	0.671	0.764
1382	130.16	60	12.61		1201	0.937	-1.91	-0.0136
1382	130.31	60.9	12.93		1201	-1.69	-0.0376	2.05
1382	130.53	60.99	17.89		1201	-0.684	0.773	-2.34
1382	129.89	60.73	17		1201	-1.9	0.0389	0.29
1382	128.93	60.66	16.1		1201	-0.314	0.172	0.168
1390	15.08	81.36	6.9		1201	1.44	-0.0119	-1.21
1390	14.91	81.81	5.62		1210	0	0	0
1390	14.62	81.41	6.62		1210	54.99	78.46	3.2
1390	15.06	82.1	6.08		1210	-1.31	-0.0971	0.502
1390	14.13	81.92	7.24		1210	-0.623	-0.311	0.144
1390	14.32	81.97	5.22		1210	-0.752	0.0905	-1.63
1390	15.09	82.89	7.05		1210	-0.0347	-0.131	1.59
1393	230.65	128.29	6.11		1210	-1.02	-0.368	-0.207
1393	230.34	132.98	12.4		1210	1.53	0.888	-1.28
1396	43.52	189.6	14.65		1219	0	0	0
1396	43.48	189.34	13.07		1219	149.63	211.26	2.09
1406	31.32	246.6	8.19		1219	1.93	-2.97	-1.1
1406	32.37	244.97	10.43		1219	1.57	-1.51	0.193
1406	29.57	246.37	10.63		1219	0.345	-0.412	-0.434
1406	30.33	245.14	11.07		1219	-1.35	-0.586	0.0602
1406	30.75	245.47	9.81		1219	-1.47	1.01	0.478
1406	30.96	245.48	9.56		1219	-0.595	2.21	-0.0506
1406	32.23	246.84	8.76		1226	0	0	0
1406	32.3	249.05	9.01		1226	161.94	172.4	26.08
1406	31.62	246.48	10.35		1226	-1.08	-2.11	1.33
1418	248.36	93.8	20.94		1226	-0.136	0.73	-1.26
1418	247.9	94.02	19.7		1226	0.332	-1.01	5.19
1418	248.28	92.96	20.15		1226	0.838	0.15	-5.48
1418	248.65	92.75	20.72		1232	0	0	0
1418	249.07	92.73	21.59		1232	246.72	156.28	15.25
1418	248.86	94.28	14.83		1232	0.000363	-0.895	0.554
1418	249.98	93.45	19.64		1232	0.0934	0.734	-1.01
1418	249.26	92.99	19.89		1232	-1.22	-1.89	1.32
1418	248.75	93.26	18.81		1238	0	0	0
1418	247.85	90.72	20.34		1238	179.06	107.6	25.64
1418	246.99	90.11	21.18		1238	1.44	-0.639	-1.68
1437	228.29	52.3	2.7		1238	-0.852	1.89	-0.91
1437	228.91	52.01	2.47		1238	-0.286	-3.52	-2.51
1437	226.99	51.79	1.44		1244	0	0	0
1437	226.79	51.68	1.7		1244	252.96	117.53	15.79
1437	228.75	51.66	2.17		1244	-2.07	0.385	-0.672
1437	228.29	51.02	0.833		1244	1.1	1.43	0.095
1437	230.59	51.63	2.43		1244	0.0438	-1.38	0.699
1437	231.87	52.01	1.82		1249	0	0	0
1437	229.29	51.38	2.61		1249	233.59	209.77	3.48
1437	230.92	51.6	2.13		1249	0.229	1.9	-0.718
1437	233.22	52.11	3.55		1249	0.294	-0.0978	1.55
1437	234.48	51.63	2.2		1254	0	0	0
1437	233.96	51.28	2.7		1254	129.97	152.58	15.3
1437	233.83	51.15	3.07		1254	0.527	-0.138	1.7
1437	232.32	51.05	3.06		1254	1.35	-0.566	0.348
1437	231.09	51.22	3.39		1259	0	0	0
1437	230.07	51.12	3.05		1259	109.32	158.31	19.79
1437	228.38	51.06	1.71		1259	0.959	0.832	0.551
1440	214.95	131.34	12.82		1259	1.5	-1.63	2.27
1440	217.41	133.56	14.58		1262	0	0	0
1443	188.34	138.38	12.89		1262	196.31	150.71	5.94
1443	190.12	136.28	11.56		1265	0	0	0
1496	10.98	184.37	2.79		1265	191.46	130.49	4.32
1496	11.38	183.82	3.34		1268	0	0	0
1496	11.92	183.74	4.58		1268	122.12	201.96	13.05
1496	12.81	183.57	4.76		1274	0	0	0
1496	13.82	182.88	5.31		1274	195.94	149.94	5.19
1496	14.32	182.45	6.39		1274	1.9	0.44	2.72
1496	13.57	181.92	4.86		1274	-1.28	-0.273	-0.0125
1496	13.5	182.41	5.26		1274	1.83	0.812	-0.922
1496	13.38	181.92	4.78		1277	0	0	0
1496	14.8	181	7.54		1277	162.1	146.79	22.36
1496	15.81	180.3	8.1		1280	0	0	0
1496	16.11	179.81	7.03		1280	143.56	170.13	13.86
1496	16.13	179.63	6.73		1320	0	0	0
1496	17.75	177.89	9.15		1320	159.1	10.2	27.77
1496	16.7	178.25	7.03		1320	1.53	-2.79	-2.66
1496	17.09	178.49	6.62		1320	1.27	-0.776	0.431
1496	17.38	178.48	7.79		1320	0.0547	-0.172	0.839
1496	17.08	179.53	6.39		1320	-0.843	1.36	-0.955
1496	17.11	179.69	6.74		1320	0.457	-0.908	0.599
1496	16.7	180.02	6.87		1320	-0.36	1.09	-1.26
1496	16.75	180.34	7.51		1320	0.122	0.981	1.63
1496	15.92	180.71	6.83		1320	0.678	0.663	-0.126
1496	14.97	180.85	6.79		1320	-0.547	-0.334	0.77
1496	15.98	180.06	8.15		1320	0.0964	-0.838	0.617
1496	14.89	180.67	5.74		1320	-0.189	-0.69	-1.62
1496	14.16	181.38	7.8		1320	0.55	0.96	-1.12
1496	14.73	182.77	5.95		1320	-0.0213	0.22	0.775
1496	12.95	183.47	6.83		1320	-0.266	1.11	-2.13
1496	10.76	185.61	4.59		1320	0.355	-1.38	1.96
1496	9.64	186.95	3.85		1320	0.00377	0.00296	-2.38
1496	7.96	188.82	5.31		1320	-0.0113	0.4	-0.384
1496	6.31	191.43	7.6		1320	-0.56	-0.663	1.72
1496	5.46	191.52	7.28		1320	-0.12	-1.27	0.0527
1496	5.79	192.49	9.82		1320	0.183	1.87	-0.616
1496	7.09	193.11	11.35		1320	0.323	1.03	0.353
1496	8.64	194.88	11.12		1320	0.0944	1.03	-0.141
1496	9.75	195.98	13.12		1320	-0.0408	0.21	0.996
1496	9.7	197.4	13.08		1320	2.06	1.01	-2.28
1496	10.49	197.28	15.65		1320	-1.1	-2.21	0.251
1496	11.02	197.48	15.63		1320	-0.47	-0.612	-1.09
1496	10.64	197.55	16.25		1320	1.71	-0.82	-1.32
1496	10.59	198.06	16.79		1320	1.87	-1.31	0.44
1496	10.57	198.15	17.57		1320	0.139	-1.41	-0.17
1496	8.61	197.74	17.09		1320	0.207	0.0831	-0.754
1496	5.43	196.57	18.92		1320	0.437	-0.766	0.156
1496	5.17	195.6	18.58		1320	0.31	-0.293	-0.652
1496	4.94	195.92	19.18		1320	-0.0682	-0.116	0.0328
1496	3.04	198.12	17.51		1320	-0.067	0.21	-0.257
1496	2.63	199.16	18.13		1320	-0.162	0.00197	-0.732
1496	2.49	199.25	17.48		1320	0.206	-1.88	2.06
1496	2.11	200.31	18.1		1320	3.62	-1.73	0.618
1496	1.33	201.06	20.46		1323	0	0	0
1505	138.04	234.69	12.03		1323	142.06	132.09	6.61
1505	142.11	239.08	11.03		1326	0	0	0
1505	142.39	237.95	13.52		1326	0.644	38.66	3.66
1505	142.66	237.91	11.47		1329	0	0	0
1505	140.07	237.02	9.64		1329	183.25	170.34	5.22
1505	141.48	237.91	17.24		1335	0	0	0
1505	140.55	235.78	11.48		1335	131.91	153.6	16.33
1505	138.9	236.84	15.02		1335	-1.88	-0.111	0.865
1512	80.59	100.15	30.18		1335	-3.08	-3.85	-3.78
1512	80.03	100.58	26.07		1335	-1.31	-0.576	1.66
1512	81.06	102.13	27.89		1353	0	0	0
1512	82.04	103.49	29.65		1353	150.17	114.22	6.58
1512	81.12	108.72	27.29		1353	5.68	-5.5	0.596
1512	80.02	108.86	24.85		1353	1.64	-0.37	1.66
1517	187.38	163.34	4.33		1353	-0.839	-0.346	-1.45
1517	189.06	164.74	3.42		1353	1.23	-0.242	-0.742
1517	188.18	167.34	4.65		1353	-1.42	0.272	-0.0226
1517	187.22	171.63	4.81		1353	0.271	-0.425	2.58
1521	141.3	63.03	19.23		1353	-0.685	-1.42	-0.821
1521	142.42	62.97	22.27		1353	0.222	-0.127	-1.47
1521	142.33	63.21	21.25		1353	-0.778	-1.14	1.08
1524	89.95	37.46	12.53		1353	-0.537	-0.196	-0.234
1524	91.46	35.13	14.77		1353	-0.0398	0.00959	0.126
1527	140.22	52.2	24.66		1353	0.262	1.73	-0.333
1527	140.03	53.76	21.47		1353	-0.716	-2.24	2.43
1531	1.22	1.25	27.08		1353	0.484	-0.636	-2.03
1531	2.38	1.38	27.57		1353	-0.475	-1.01	1.85
1531	2.8	1.01	27.59		1356	0	0	0
1535	65.67	129.21	12.8		1356	59.97	171.57	15.68
1535	64.5	128.34	11.39		1360	0	0	0
1535	64.81	128.62	10.06		1360	205.24	164.88	30.06
1546	112.02	91.4	3.99		1360	-4.1	-5.63	-0.0633
1546	111.84	91.96	4.68		1363	0	0	0
1546	108.1	90.85	4.38		1363	142.31	98.73	17.54
1546	108.81	89.77	3.77		1366	0	0	0
1546	111.26	91.63	5.45		1366	183.43	106.31	26.81
1546	110.17	91.33	2.94		1371	0	0	0
1546	111.29	90.9	3.64		1371	84.8	162.42	22.84
1546	112.64	90.04	4.86		1371	-1.44	-1.56	0.111
1546	109.26	91.26	2.3		1371	0.345	2.67	6.6
1546	109.39	92.06	4.67		1384	0	0	0
1602	134.09	221.86	18.21		1384	179.07	108.32	27.95
1602	134.3	222.19	19.53		1384	0.49	0.192	-0.811
1602	133.36	221.66	14.38		1384	-0.724	-0.562	-1.9
1602	130.25	218.79	20.15		1384	0.503	-0.302	2.22
1602	134.42	220.03	20.15		1384	-0.594	0.463	-4.14
1602	133.96	221.1	18.11		1384	0.453	-1.12	0.217
1602	133.92	221.79	19.81		1384	0.542	0.705	1.15
1602	134.86	222.68	20.34		1384	0.135	0.0605	1.85
1602	134.18	223.02	19.68		1384	0.261	0.369	-3.02
1602	134.41	222.37	20.15		1384	-1.96	-0.505	3.06
1602	133.5	221.77	20.11		1384	-2.49	-1.99	1.29
1602	133.62	221.98	18.91		1387	0	0	0
1602	132.1	219.54	19.05		1387	220.04	167.5	2.2
1602	134.35	221.18	21.57		1394	0	0	0
1602	133.45	220.52	20.9		1394	252.5	12.31	12.6
1602	132.57	219.13	18.54		1394	-0.298	-0.446	-2.21
1602	131.87	219	18.38		1394	0.261	-0.485	-2.11
1602	132.88	220.21	21.05		1394	0.512	1.42	4.04
1602	132.2	219.05	22.21		1394	-0.126	-1.13	-2.91
1602	131.03	218.43	18.85		1400	0	0	0
1602	133.58	219.52	20.78		1400	195.84	149.63	7.29
1602	130.76	218.88	20.12		1400	2.57	0.102	2.16
1602	130.77	218.53	19.23		1400	-2.96	-0.409	-0.817
1602	129.55	218.27	19.84		1400	2.83	0.716	0.878
1602	132.13	219.67	20.01		1404	0	0	0
1602	133.11	219.71	20.36		1404	108.82	157.35	17.32
1602	129.8	218.3	20.99		1404	-2.16	-2.1	5.37
1602	131.74	219.11	20.61		1411	0	0	0
1602	131.67	217.15	20		1411	190.98	131.38	3.42
1602	132.97	220.3	17.97		1411	1.91	-0.991	3.4
1602	132.95	219.08	18.46		1411	-2.26	-0.461	-2.37
1602	131.75	218.73	19.24		1411	-0.389	1.05	2.29
1602	133.24	219.06	23.33		1411	-0.235	-0.818	-1.48
1602	134.22	218.77	24.04		1414	0	0	0
1602	134.07	216.57	19.6		1414	1.26	41.21	6.25
1602	132.58	219.76	17.14		1422	0	0	0
1602	132.04	220.05	18.09		1422	135.31	148.91	3.45
1602	133.96	217.38	20.12		1422	1.42	-0.939	-0.372
1602	133.68	218.41	20.3		1422	-1.3	1.68	1.62
1602	133.58	217.54	20.6		1422	0.518	0.538	-2.38
1602	133.76	217.37	19.33		1422	1.13	5.06	4.68
1602	132.97	218.03	19.5		1422	-2.49	-2.69	-4.49
1602	133.17	217.43	19.14		1426	0	0	0
1602	133.24	218.4	21.17		1426	127.32	147.4	10.19
1602	133.72	218.49	21.42		1426	-0.575	1.61	1.66
1602	133.78	218.19	21.31		1445	0	0	0
1602	134.29	218.58	22.99		1445	231.2	210.73	4.22
1602	134.09	217.79	21.76		1445	0.725	1.52	-0.736
1602	132.6	219.84	20.17		1445	-0.251	-1.05	0.451
1602	132.47	218.54	19.61		1445	0.274	-0.53	-1.02
1602	133.14	217.23	21.79		1445	-0.284	-1.11	-0.437
1602	131.5	218.97	19.46		1445	0.192	1.7	0.0718
1602	131.84	219.92	16.51		1445	-0.898	0.619	1.38
1602	130.91	222.28	20.32		1445	0.817	-0.857	-0.983
1602	131.3	221.62	16.84		1445	0.0732	1.25	1.94
1605	209.39	127.47	11.72		1445	0.713	-2.36	-1.54
1605	208.45	126.17	14.63		1445	-0.628	1.03	-1
1608	42.15	188.55	5.07		1445	0.324	-1.34	-0.233
1608	41.87	188.96	7.89		1445	0.241	0.246	0.516
1611	119.9	227.23	27.36		1445	-1.02	1.95	-0.263
1611	117.94	224.37	23.42		1445	0.66	0.285	0.757
1614	206.78	4.33	21.44		1445	0.919	-0.697	-0.121
1614	207.73	4.57	22.52		1445	1.05	-2.09	0.0841
1617	141.2	108.87	14.06		1451	0	0	0
1617	143.07	109.1	10.35		1451	251.7	118.88	18.5
1620	24.81	233.92	5.99		1451	0.733	-1.06	-0.297
1620	23.97	233.38	4.14		1451	-0.532	0.356	-1.43
1623	199.73	120.25	2.17		1451	-0.298	1.02	-1.3
1623	198.5	120.3	3.6		1461	0	0	0
1629	139.37	148.69	6.65		1461	249.9	157.77	17.05
1629	139.65	148.5	4.94		1461	-0.246	0.0543	0.205
1629	139.21	148.74	4.71		1461	0.402	-0.417	-1.58
1629	140.41	148.31	4.49		1461	-0.919	0.878	-0.117
1629	140.51	148.08	6.88		1461	-0.436	-0.555	2.34
1632	35.56	183.67	15.79		1461	0.675	1.14	-2.07
1632	33.64	183.35	9.55		1461	-1.67	-1.28	-0.247
1655	38.23	184.5	14.5		1461	-1	-0.38	0.459
1655	39.72	183.94	16		1466	0	0	0
1655	38.21	185.7	21.02		1466	54.1	77.9	4.26
1655	39.17	185.13	19.38		1466	-0.479	0.127	-1.65
1655	36.9	184.4	16.97		1466	-1.23	1.07	-0.154
1655	35.47	184.27	19.72		1470	0	0	0
1655	40.9	180.51	20.99		1470	163.4	106.09	5.87
1655	37.62	184.81	17.61		1470	0.37	0.855	-0.926
1655	38.22	181.27	15.63		1473	0	0	0
1655	38.37	184.17	14.61		1473	67.22	28.43	11.02
1655	40.09	188.06	13.02		1479	0	0	0
1655	40.18	187.85	12.11		1479	131.44	153.09	17.11
1655	40.16	186.48	11.77		1479	-1.94	-0.0916	1.04
1655	39.65	185.66	12.41		1479	1	-0.293	-3.31
1655	40.46	186.57	11.96		1479	-2.27	0.296	-3.05
1655	40.06	186.7	10.74		1482	0	0	0
1655	40.81	187.92	13.44		1482	66.29	174.99	8.37
1655	41.53	187.71	12.89		1485	0	0	0
1655	41.62	188.54	12.44		1485	17.24	10.08	6.05
1655	40.89	188.66	9.29		1489	0	0	0
1655	42.09	186.76	16.21		1489	169.36	24.42	3.06
1655	41.11	187.43	20.07		1489	1.07	0.434	0.213
1675	219.8	115.35	22.29		1492	0	0	0
1675	219.37	116.53	20.83		1492	220.66	168.1	5.77
1675	217.16	114.28	14.25		1495	0	0	0
1675	217.87	114.45	14.74		1495	159.67	180.95	0.968
1675	218.42	115.83	14.26		1505	0	0	0
1675	217.11	116.28	14.19		1505	129.72	64.25	5.85
1675	217.18	118.27	12.29		1505	0.142	-0.49	0.407
1675	215.25	118.14	12.05		1505	0.239	0.281	-1.06
1675	212.91	123.68	14.2		1505	-2.11	-0.845	-0.229
1675	212.55	125.51	12.3		1505	1.47	0.0888	2.21
1675	210.66	126.15	13		1505	0.0943	-0.861	-2.5
1675	209.7	125.87	11.6		1505	-1.71	1.31	0.0994
1675	208.51	126.44	11.78		1505	0.578	1.11	1.59
1675	208.52	127.87	12.13		1511	0	0	0
1675	210.31	127.88	12.78		1511	158.46	165.1	8.6
1675	209.53	129.46	12.71		1511	-0.883	-0.589	0.179
1675	210.61	128.33	15.01		1511	-3.59	-0.184	0.449
1675	211.56	126.96	14.51		1511	0.274	0.626	0.229
1675	210.04	126.88	17.91		1514	0	0	0
1678	57.81	159.97	8.61		1514	78.07	174.18	17.93
1678	60.52	160.64	12.18		1525	0	0	0
1682	139.42	63.2	18.98		1525	196.3	150.31	14.94
1682	140.17	62.67	23.29		1525	0.0398	-0.236	0.808
1682	141.26	61.59	22.01		1525	-0.747	0.367	0.919
1809	110.36	151.14	12.91		1525	0.04	0.815	1.63
1809	110.85	151.35	15.68		1525	0.0348	-0.306	-2.06
1809	111.91	152.8	16.37		1525	0.355	-0.764	-1.3
1809	110.11	153.78	17.93		1525	0.333	-0.866	-4.94
1809	108.72	154.67	18.3		1525	0.12	0.145	0.264
1809	109	154.73	18.07		1525	1.33	0.222	-1.15
1809	108.52	155.54	17.65		1593	0	0	0
1809	107.37	155.88	16.4		1593	152.08	206.85	6.58
1809	106.7	156.3	16.79		1593	-0.536	0.283	-0.888
1809	106.07	155.69	16.35		1593	-0.0998	-0.171	-0.304
1809	105.6	155.14	19.02		1593	1.83	-0.363	0.779
1809	105.12	153.44	18.52		1593	-2.63	1.15	-0.542
1809	106.06	154.99	20.05		1593	0.379	0.557	-0.362
1809	105.69	154.73	20.05		1593	0.0723	0.118	-0.166
1809	105.54	154.37	18.74		1593	0.00215	-0.0667	0.34
1809	105.81	155.68	18.24		1593	-0.549	0.821	-0.0686
1809	106.33	155	20.74		1593	0.886	-1.15	-0.28
1809	107.32	155.7	18.6		1593	-0.658	0.467	0.342
1809	109.16	155.42	20.45		1593	0.256	-0.737	-0.939
1809	110.22	155.05	19.57		1593	0.0943	0.0234	0.128
1809	111.92	153.2	16.41		1593	0.174	-0.231	-0.787
1809	112.54	152.3	16.75		1593	-0.146	0.448	0.497
1809	113.96	150.86	14.26		1593	0.328	-0.00247	1.15
1809	114.33	147.71	12.75		1593	-0.4	-0.135	-0.209
1809	114.7	145.87	13.16		1593	0.476	-0.165	0.186
1809	113.88	144.74	13.93		1593	-0.364	-0.322	-1.67
1809	113.54	144.65	12.04		1593	0.0532	0.255	1.47
1809	112.84	144.25	11.5		1593	-0.0111	-0.0676	-0.731
1809	113.01	143.8	13.87		1593	-0.305	0.0255	0.0813
1809	111.88	142.1	12.05		1593	0.268	0.511	0.506
1809	112.62	142.21	12.77		1593	-0.848	0.482	0.479
1809	112.52	140.88	11.54		1593	0.629	-0.465	-0.825
1809	113.49	139.88	12.03		1593	-0.426	-0.49	-0.0118
1809	114.16	133.28	11.74		1593	0.367	0.636	-0.164
1809	114.33	132.19	11.75		1593	-0.117	-0.746	0.483
1809	113.45	128.78	13.38		1593	-0.703	0.728	-0.421
1809	111.77	127.14	15.17		1593	0.0541	0.891	-0.255
1809	110.41	126.22	15.28		1593	0.833	-0.658	0.485
1809	109.37	126.17	12.71		1593	0.195	0.379	-0.641
1809	108.16	125.5	12.16		1593	-0.43	-0.3	-0.755
1809	105.65	123.9	12.26		1593	0.543	0.461	1.36
1809	104.91	122.06	12.79		1593	-0.51	-1.23	-0.665
1809	104.86	121.6	12.04		1593	1.2	0.0991	0.7
1809	104.14	120.79	10.18		1593	-1.49	1.34	0.249
1809	104.06	120.02	11.81		1593	0.107	-0.536	-2.25
1809	103.85	118.41	9.96		1593	0.95	0.064	0.991
1809	103.29	118.27	10.53		1593	-0.28	-0.17	-1.05
1809	104.06	117.82	10.98		1593	-0.012	0.518	1.67
1809	104.81	116.93	10.79		1593	0.382	-0.188	-0.69
1809	106.06	116.88	11.99		1593	-0.625	0.386	-0.235
1809	107.2	116.48	11.81		1593	0.387	-0.61	-0.825
1809	108.34	116.59	14.67		1593	-0.0582	0.389	0.895
1809	108.89	117.63	15.49		1593	-0.138	0.133	-0.629
1809	107.94	117.8	15.76		1593	-0.207	0.00702	-0.674
1809	109.15	118.38	15.19		1593	0.0791	-0.743	0.0877
1809	108.92	118.45	15.94		1593	-0.0875	-0.196	-0.776
1809	109.59	118.19	16		1593	-0.0173	0.681	1.03
1809	108.94	117.1	16.33		1593	0.775	-1.41	-0.936
1809	109.58	115.51	14.63		1593	-0.233	1.01	0.174
1809	110.62	115.24	14.16		1593	-0.586	0.481	0.0545
1809	109.66	115.59	13.34		1593	-0.0549	-0.371	-0.783
1809	109.19	116.8	13.19		1593	0.0359	0.451	1.06
1809	109.34	118.6	15.51		1593	-0.225	0.0611	-0.685
1809	109.2	118.43	14.01		1593	0.917	-0.815	-1.06
1809	109.81	118.07	14.17		1593	-1.03	1.02	0.64
1809	110.17	118.41	19.29		1593	-0.658	1.69	0.843
1809	109.25	120.28	19.96		1593	1.36	-0.561	-0.552
1809	108.88	120.23	18.48		1593	0.47	-1.45	-0.169
1809	107.81	120.89	19.41		1593	-0.349	0.771	0.0531
1809	107.15	119.66	19.26		1593	-0.571	0.863	0.633
1809	106.45	118.51	19.13		1593	-0.228	-0.108	-0.738
1809	104.91	117.39	23.44		1593	0.134	-0.555	0.173
1809	103.96	117.84	23		1593	-0.0179	0.335	-0.278
1809	102.88	118.29	24.59		1596	0	0	0
1809	102.6	119.35	26.69		1596	144.5	108.72	10.94
1809	101.13	120.31	26.5		1601	0	0	0
1809	99.91	120.66	27.55		1601	51.96	77.96	4.49
1809	95.8	123.84	23.73		1601	-0.847	0.881	-0.536
1809	94.51	124.99	27.99		1601	-0.441	-0.322	-0.338
1809	92.72	125.02	30.76		1606	0	0	0
1809	91.27	126.62	29.56		1606	143.44	170.96	13.21
1809	89.47	127.2	29.43		1606	-0.514	-0.331	0.494
1809	89.89	132.07	28.74		1606	1.24	0.0898	0.201
1809	90.71	135.4	28.07		1609	0	0	0
1809	91.29	138.98	28.62		1609	236.81	151.24	2.28
1809	91.86	139.36	27.48		1612	0	0	0
1809	91.23	139.94	26.58		1612	220.47	167.67	6.07
1809	90.36	140.35	27.52		1713	0	0	0
1809	90.65	141.11	25.94		1713	167.68	67.6	24.88
1809	92.42	142.59	24.33		1713	0.155	-0.382	0.165
1809	93.53	143.3	23.67		1713	-0.115	0.654	-1.57
1809	93.82	144.99	21.41		1713	0.28	-1.08	0.6
1809	94.29	145.3	21.56		1713	-0.39	0.505	0.834
1809	94.47	146.59	21.43		1713	-0.272	0.361	0.424
1809	95.25	148.3	20.77		1713	-0.0774	0.597	-2.32
1809	95.82	149.04	21.3		1713	0.828	-0.396	3.01
1809	95.84	149.03	19.43		1713	-1.18	0.357	0.358
1809	97.83	150.31	21.41		1713	0.78	-0.406	-3.07
1809	98.47	150.1	21.58		1713	0.316	-0.831	1.25
1809	99.05	150.25	21.44		1713	0.85	-0.33	0.383
1809	99.62	150.66	23.18		1713	-0.727	-0.307	0.535
1809	98.84	150.73	22.76		1713	-0.298	0.0521	-0.924
1809	100.46	152.11	21.4		1713	-0.148	0.444	-1.23
1809	102.66	153.97	22.28		1713	-0.116	0.708	0.738
1809	105.03	153.94	17.17		1713	1.4	-0.749	0.895
1809	109.56	153.47	21.01		1713	0.352	-0.68	1.11
1809	112.24	152.91	17.88		1713	-1.15	-1.64	0.11
1809	114.18	149.22	19.6		1713	0.762	2.72	-1.32
1809	115.87	148	19.94		1713	-0.187	-0.744	-0.0891
1809	116	146.15	19.22		1713	-0.287	-0.0344	0.0691
1809	115.67	146.81	18.42		1713	0.831	-0.444	-1.53
1809	115.97	143.58	16.69		1713	-0.484	0.432	0.403
1809	118.21	143.6	15.71		1713	-0.349	0.309	-1.13
1809	119.44	143.41	12.97		1713	0.251	-0.117	0.653
1809	121.06	142.77	13.59		1713	0.857	0.661	2.08
1809	121.59	143.25	13.07		1713	-0.575	0.198	-2.27
1809	123.39	143.2	13.03		1713	-0.283	-0.301	0.915
1809	124.14	142.33	11.45		1713	0.321	0.248	-1.28
1809	123.42	142.04	12.23		1713	-0.655	-0.555	1.16
1809	123.59	141.31	11.16		1713	0.672	0.807	0.0648
1809	123.77	140.76	11.18		1713	-0.631	-0.205	-1.19
1809	123.92	140.75	11.72		1713	-0.245	0.712	0.456
1809	123.62	141.92	11.1		1713	0.491	-0.559	-0.472
1809	124.02	140.44	11.24		1713	-0.937	0.487	-0.857
1809	123.84	144.79	9.92		1713	0.695	-0.88	1.56
1809	123.55	144.49	6.82		1713	-0.347	0.58	-1.31
1812	151.65	197.88	12.54		1713	0.292	-0.376	-0.494
1812	152.49	199.63	13.42		1713	-0.779	-0.609	1.72
1830	49.32	233.4	11.93		1713	-0.0913	-0.695	0.803
1830	50.13	232.81	10.5		1713	0.205	1.05	-3.14
1830	48.27	234.92	9.43		1713	-0.63	-0.594	1.4
1830	49	234.46	9.3		1713	0.0252	0.565	-0.638
1830	47.96	234.68	8.9		1713	0.379	-1.06	0.0345
1830	43.56	228.74	6.8		1713	-0.366	0.633	-0.292
1830	43.58	228.31	8.03		1713	-0.0645	-0.886	1.99
1830	43.55	229.18	7.69		1713	0.418	0.57	-0.94
1830	43.66	229.34	6.41		1713	-0.307	-0.456	-0.152
1830	43.74	230.3	7.83		1713	0.566	-0.00318	-0.0931
1830	46.11	233.83	7.29		1713	-0.495	0.541	-0.446
1830	44.98	228.51	6.96		1713	-0.937	-1.18	0.354
1830	44.59	232.14	8.35		1713	0.806	0.11	-1.07
1830	45.24	236.04	7.85		1713	-0.64	-0.229	0.365
1830	43.93	231.53	8.36		1713	0.379	-0.277	0.909
1830	45.05	231.58	7.45		1713	0.365	-0.838	-0.408
1830	44.96	234.22	6.81		1713	-0.461	-0.801	1.46
1833	184.13	157.93	4.83		1713	0.237	-0.175	-1.12
1833	184.13	158.91	3.68		1713	-0.436	0.363	1.03
1837	75.84	98.2	23.58		1713	0.451	0.333	-0.799
1837	76.6	98.65	25.56		1713	-0.148	0.0113	-0.586
1837	77.25	97.97	22.53		1713	0.118	-1.2	1.29
1850	15.68	80.98	5.04		1713	-0.0867	0.252	-0.658
1850	15.66	80.62	6.41		1713	0.0473	-0.852	0.228
1850	15.6	79.73	6.53		1713	-0.318	1.51	-1.44
1850	15.44	81.34	6.15		1713	-0.226	-0.714	1.02
1850	15.74	80.81	7.6		1713	-0.428	0.7	-2.05
1850	15.96	79.06	7.95		1713	0.802	0.00196	1.59
1850	15.22	80.04	4.74		1713	-0.596	0.291	-2.28
1850	14	80.81	6.56		1713	0.446	0.0158	1.04
1850	13.99	78.76	6.15		1713	-0.361	1.23	-0.388
1850	14.69	78.51	5.97		1713	-0.372	-1.09	0.344
1850	14.51	79.01	5.64		1713	0.391	-0.702	-0.632
1850	12.83	79.4	7.18		1713	-0.806	0.921	-1.53
1860	25.31	87.62	19.45		1713	0.312	0.0612	1.12
1860	25.77	87.1	23.24		1713	0.667	1.26	-0.505
1860	25.19	86.72	26.04		1713	-0.232	-1.09	0.974
1860	23.79	85.15	21.47		1713	-0.093	-1.04	1.09
1860	23.07	83.5	17.76		1713	-0.756	1.43	-1.73
1860	24	84.61	24.01		1713	0.236	-0.125	0.309
1860	23.83	85.67	20.1		1713	-1.81	1.8	-2.08
1860	22.51	83.74	22.94		1713	1.67	-1.52	1.67
1860	23.48	84.31	16.7		1713	-0.272	-0.682	-0.0453
1863	142.17	113.6	10.83		1713	-0.176	0.819	-2
1863	142.28	111.28	9.92		1713	0.842	-0.519	0.665
1882	91.56	248.08	34.29		1713	-0.295	0.21	-0.262
1882	92.39	247.02	30.1		1713	-0.251	-1.29	1.66
1882	94.71	245.85	30.34		1713	1.13	-0.219	-1.37
1882	92.35	247.38	26.15		1713	-1.5	0.96	-0.198
1882	92.79	246.3	23.56		1713	0.158	-0.155	-0.05
1882	91.05	244.61	20.72		1713	0.598	-0.836	0.733
1882	87.21	244.12	19.53		1713	-0.192	0.507	-1.56
1882	84.81	242.18	18.7		1713	-0.935	0.0609	0.666
1882	82.87	239.99	16.18		1713	1.44	0.556	-0.344
1882	78.68	239.76	14.41		1713	-1.29	-0.0808	1.05
1882	76.36	240.45	13.62		1713	0.521	-0.616	-1.13
1882	73.68	240.95	12.95		1713	-0.371	1.75	-0.835
1882	69.94	242.17	11.77		1713	0.204	-1.86	1.12
1882	67.46	244.97	11.96		1713	-1	-1.73	-0.0601
1882	64.33	247.58	12		1716	0	0	0
1882	61.41	250.03	10.19		1716	163.07	105.97	4.87
1882	60.09	251.57	10.45		1719	0	0	0
1882	59.29	251.63	8.76		1719	109.63	156.97	22.67
1885	97.5	181.25	5.17		1723	0	0	0
1885	100.53	177.97	5.72		1723	160.86	169.85	25.75
1888	195.98	127.16	3.86		1723	-0.24	0.956	-0.823
1888	199.14	122.71	5.67		1746	0	0	0
1895	51.85	168.72	7.96		1746	206.26	118.58	27.19
1895	52.5	166.91	7.83		1746	-0.288	0.27	-0.0284
1895	50.86	164.81	9.41		1746	-0.514	1.06	1.66
1895	51.56	164.12	11.76		1746	0.473	-0.666	-2.8
1895	51.39	162.82	10.55		1746	0.0535	0.25	1.38
1895	51.35	162.02	11.52		1746	0.0588	-0.215	-1.27
1898	19.74	179.27	10.29		1746	-0.187	0.156	0.0596
1898	20.81	180.11	6.7		1746	-0.00586	-0.161	-0.172
1902	18.34	251.91	13.41		1746	0.24	-0.413	-1.92
1902	17.24	251.88	11.59		1746	0.291	-0.349	-1.6
1902	18.47	251.96	11.47		1746	0.509	0.0214	1.02
1915	89.99	32.78	9.09		1746	-0.595	0.435	-0.0188
1915	89.98	35.48	9.13		1746	0.336	0.0461	-1.18
1915	90.4	33.33	10.34		1746	0.683	0.675	0.602
1915	90.82	33	8.69		1746	0.276	-0.0871	0.868
1915	90.57	34.75	11.87		1746	0.221	0.268	-1.81
1915	90.88	34.62	10.74		1746	-0.781	1.09	-0.714
1915	90.83	34	11.3		1746	0.0537	-2.19	2.91
1915	92.4	34.55	11.92		1746	0.195	0.504	-1.65
1915	91.05	36.42	11.48		1746	-0.422	0.196	-0.237
1915	90.69	35.5	12.88		1746	0.909	-0.721	-0.487
1915	90.38	35.12	11.25		1755	0	0	0
1915	91.32	35.9	12.16		1755	191.12	130.62	7.67
1935	97.36	90.55	36.27		1755	1.42	0.0608	1.38
1935	97.94	91.25	36.74		1755	-1.82	0.231	-3.69
1935	97.93	91.73	36.59		1755	0.348	-1.64	-1.26
1935	97.09	92.09	37.63		1755	0.387	-0.064	1.26
1935	97.09	94.44	36.62		1755	-0.621	1.85	2.16
1935	94.41	96.62	35.42		1755	1.55	-1.1	-2.02
1935	93.09	97.26	33.45		1790	0	0	0
1935	91.74	97.15	34.42		1790	134.17	147.92	12.6
1935	90.5	98.15	34.11		1790	-2.06	-0.623	-2.2
1935	90.35	99.37	33.23		1790	2.02	0.836	0.819
1935	89.72	99.85	33.98		1790	0.244	0.211	0.593
1935	90.21	98.75	32.28		1790	1.55	-2.73	-5.17
1935	90.59	98.31	31.31		1790	-1.98	3.03	5.88
1935	90.86	98.26	32.97		1790	0.00816	-1.2	-1.52
1935	92.19	98.07	33.06		1790	-4.02	1.13	-0.981
1935	93.8	96.7	34.16		1790	1.93	0.139	0.0812
1935	97.34	94.68	35.78		1790	0.698	-0.286	-1.14
1935	98.16	92.83	36.01		1790	1.05	-0.378	1.02
1935	98.34	93.11	34.19		1790	-0.415	0.462	1.48
1943	177.9	156.38	10.12		1790	-0.319	-0.985	-2.14
1943	179.17	155.41	9.92		1790	0.966	0.0237	0.0265
1943	177.57	156.61	4.93		1790	0.603	-0.133	0.37
1943	178.73	155.49	3.59		1790	-0.124	-0.651	-1.86
1943	180.82	155.45	4.41		1790	1.16	-2.09	-2.36
1943	182.53	155.88	3.96		1790	-0.0122	-0.451	-0.933
1943	183.54	157.74	3.99		1790	0.275	1.54	2.49
1959	18.36	179.07	14.43		1790	0.189	0.636	1.27
1959	18.37	178.98	15.88		1790	-1.45	-2.65	-2.26
1959	19.21	180.56	9.67		1790	1.1	3.29	4.31
1959	19.1	175.83	11.01		1790	-0.581	0.0232	0.829
1959	19.83	176.68	11.29		1790	0.405	-0.292	-0.527
1959	19.05	177.51	11.93		1790	0.41	-1.56	-4.06
1959	18.52	176.02	12.63		1790	-1.03	2.54	5.12
1959	18.8	174.69	11.01		1790	0.315	-0.0264	-1.79
1959	17.97	176.52	13.47		1790	0.811	-0.493	-5.59
1959	18.67	176.67	9.79		1790	0.202	-0.68	-0.00399
1959	19.36	177.56	9.74		1790	-1.28	2.89	4.38
1959	18.93	176.25	10.56		1790	-0.952	0.794	1.52
1959	17.66	174.54	10.99		1790	-0.387	-0.0665	0.726
1959	17.68	172.01	12.07		1790	2.78	0.0799	-1.96
1959	18.35	172.61	11.21		1800	0	0	0
1966	151.48	195.08	13.06		1800	54.81	78.63	3.13
1966	151.29	197.02	9.46		1800	-0.682	-0.83	-0.498
1966	151	196.72	9.58		1800	-0.507	0.513	1.59
1966	151.22	196.94	10.64		1800	0.488	-0.0798	-0.907
1966	152.78	198.77	13.87		1800	1.76	-0.855	-0.504
1966	150.73	196.58	8.11		1800	-1.35	0.522	1.69
1985	73.11	252.12	3.06		1800	-0.153	0.24	-0.91
1985	73.88	251.82	3.55		1800	1.7	0.246	-2.28
1985	75.81	250.86	4.54		1804	0	0	0
1985	74.8	247.59	9.76		1804	19.55	9.32	5.78
1985	76.66	250.54	7.35		1804	3.19	-0.341	6.15
1985	76.61	250.68	5.45		1808	0	0	0
1985	76.83	250.21	5.53		1808	180.51	165.04	7.39
1985	76.98	250.18	4.93		1808	0.145	-2.52	0.63
1985	76.93	250.56	5.55		1811	0	0	0
1985	76.35	250.28	6.32		1811	159.49	168.45	8.49
1985	76.63	250.64	5.39		1817	0	0	0
1985	76.76	250.22	6.1		1817	250.7	152.19	21.04
1985	76.01	251.29	5.07		1817	1.28	4.24	-3.19
1985	77.12	250.77	4.32		1817	-0.822	-1.18	0.359
1985	78.22	250.28	6.38		1817	0.481	-1.1	-0.901
1985	77.89	250.98	5.48		1820	0	0	0
1985	79.25	251.23	9.57		1820	235.99	42.85	32.81
1985	75.84	252.39	6.05		1823	0	0	0
1990	79.42	130.74	2.62		1823	161.12	7.86	24.19
1990	78.48	130.1	6.03		1840	0	0	0
1990	77.21	126.33	4.7		1840	155.56	159.29	8.66
1990	78.39	130.14	3.21		1840	0.578	0.181	-0.671
2000	167.33	151.8	1.98		1840	-0.627	0.281	2.03
2000	166.58	151.28	2.83		1840	-0.348	0.301	0.808
2000	167.05	151.8	2.22		1840	1.03	0.0227	-0.116
2000	166.99	151.97	2.1		1840	-1.37	0.552	-1.77
2000	166.95	152.61	1.92		1840	-1.19	-0.196	-0.298
2000	166.78	152.7	3.22		1840	0.339	0.162	-0.33
2000	167.22	153.04	3.07		1840	0.966	-0.544	0.529
2000	167.82	153.39	2.84		1840	-1.21	1.11	-2.77
2000	166.17	154.63	2.07		1840	1.28	-1.09	1.73
2003	141.81	188.34	13.1		1840	0.15	0.929	4.14
2003	144.29	187.53	13.17		1840	0.245	0.263	-3.61
2025	52.78	128.67	5.09		1840	1.84	-2.37	0.16
2025	49.24	127.4	6.82		1840	-1.72	0.878	2.62
2025	49.64	128.05	6.8		1899	0	0	0
2025	50.61	127.11	4.33		1899	182.93	158.12	11.14
2025	48.29	128.08	6.63		1899	0.83	0.148	2.23
2025	49.47	127.74	7.52		1899	0.0552	1.28	-2.48
2025	49.51	126.72	8.16		1899	-0.286	-0.137	1.89
2025	49.81	125.99	9.49		1899	-0.738	0.512	-1.23
2025	49.38	126.2	9.69		1899	0.898	0.199	1.78
2025	49.97	125.99	7.56		1899	-1.46	0.45	0.809
2025	49.38	125.8	7.17		1899	0.999	-0.0664	-2.81
2025	50.62	125.6	6.66		1899	-0.496	-0.78	-0.95
2025	51.86	126.17	5.7		1899	-0.287	-0.151	-0.74
2025	52.85	126.64	6.57		1899	0.572	0.137	0.904
2025	55.01	126.17	6.61		1899	0.0695	0.861	-1.02
2025	57.3	126.77	5.74		1899	0.324	-0.774	0.504
2025	57.85	126.08	5.67		1899	0.647	0.973	-0.546
2025	58.27	125.68	4.93		1899	-0.316	0.284	1.55
2025	60.15	125.41	5.34		1899	-0.484	-1.11	-1.92
2025	59.21	125.45	5.24		1899	0.0309	0.278	1.44
2025	61.11	124.2	5.18		1899	0.0312	0.132	-0.0274
2033	23.18	232.37	3.4		1899	0.271	-0.432	-1.36
2033	25.79	233.61	5		1899	-0.319	0.475	-0.892
2033	25.43	233.76	5.5		1899	0.796	0.143	0.185
2033	24.84	234.32	4.94		1899	-0.18	-0.734	0.313
2033	23.03	234.72	4.1		1899	-0.111	0.0897	2.22
2033	24.79	234.09	6.04		1899	-1.55	-0.38	-0.751
2033	23.88	232.88	3.81		1899	1.16	0.314	-0.416
2038	225.7	88.23	17.95		1899	0.472	0.63	-0.816
2038	222.98	90.63	17.45		1899	-0.547	0.269	-0.338
2038	224.07	92.17	16.24		1899	0.786	-0.548	1.18
2038	221.63	95.24	15.15		1899	-0.928	0.0567	-0.625
2045	2	249	16.9		1899	-0.15	-0.144	-1.85
2045	2.19	249.69	14.77		1899	-0.25	0.189	1.07
2045	1.94	249.18	13.22		1899	-0.389	-0.223	-0.24
2045	1.9	248.8	12.2		1899	1.57	0.675	0.792
2045	2.2	248.48	9.32		1899	-0.0753	0.525	-2.68
2045	1.76	249.12	10.56		1899	-0.896	-1.18	2.91
2055	77.51	197.8	11.07		1899	0.447	0.324	-0.377
2055	79.38	196.71	11.67		1899	-0.412	0.439	-1.71
2055	79.41	197.14	11.66		1899	0.773	-0.165	0.584
2055	80.53	196.63	10.94		1899	-0.0889	-0.248	-0.683
2055	80.6	196.07	11.92		1899	-0.307	-0.472	1.05
2055	81.13	195.53	11.78		1899	-1.36	0.142	-0.85
2055	80.1	195.9	12.5		1899	0.464	0.963	-0.942
2055	80.28	195.85	11.73		1899	0.383	0.186	2.34
2055	79.4	196.24	10.73		1899	0.578	-0.194	-2.37
2066	33.46	238.73	28.96		1899	-0.518	-0.437	0.614
2066	33.96	238.56	30.56		1899	0.18	0.0939	-0.111
2066	32.19	238.13	28.31		1899	-0.481	0.591	-1.31
2066	31.13	238.29	23.93		1899	-1.01	-0.497	1.05
2066	31.88	238.19	23.18		1899	-0.178	0.714	-0.625
2066	32.49	237.93	24.35		1899	-0.507	0.045	0.515
2066	34.26	239.61	23.11		1899	0.139	0.223	-0.336
2066	35.04	238.23	18.55		1899	-0.273	0.652	-1.04
2066	35.35	237.74	18.9		1899	0.278	0.0313	1.73
2066	34.76	240.55	14.4		1899	-0.562	0.0848	-0.134
2069	238.34	99.19	16.84		1899	1.49	0.534	-0.644
2069	237.33	99.48	17.08		1899	-1.4	0.741	-0.143
2076	79.47	131.05	5.42		1899	0.281	-1.82	-1.52
2076	79.78	129.36	2.37		1903	0	0	0
2076	77.68	126.81	4		1903	193.47	197.36	1.83
2076	77.76	126.72	4.83		1903	1.16	-0.82	-1.14
2076	75.9	122.57	5.27		1906	0	0	0
2076	75.79	122.22	6.03		1906	216.56	55.89	27.06
2079	227.64	128.52	17.73		1915	0	0	0
2079	229.68	129.73	14.17		1915	179.53	106.01	27.2
2087	155	144.02	6.88		1915	0.251	1.57	-0.0914
2087	155.38	144.84	6.91		1915	-0.255	-0.664	-1.7
2087	154.76	143.82	12		1915	-0.58	1.88	0.451
2087	154.23	143.17	11.14		1915	0.382	0.806	0.453
2087	155.13	142.63	8.59		1915	-1.13	-1.71	1.09
2087	156.38	140.45	6.76		1915	-2.51	-1.31	0.956
2087	155.8	140.03	6.8		1923	0	0	0
2091	30.99	27.87	24.13		1923	162.99	166.84	26.67
2091	32.77	30.93	19.83		1923	-2.44	2.9	1.26
2091	32.1	30.85	21.25		1923	0.866	-1.68	0.17
2096	144.91	186.32	18.43		1923	-0.135	0.778	-0.523
2096	143.52	187.58	15.68		1923	-1.55	0.9	-0.131
2096	142.73	187.59	17.42		1923	3.14	-1.2	2.91
2096	144.39	187.84	14.3		1926	0	0	0
2100	39.02	196.25	13.97		1926	145.59	171.2	15.56
2100	40.65	194.99	12.4		1943	0	0	0
2100	40.38	194.38	8.93		1943	220.62	167.01	4.57
2103	20.68	251.26	19.85		1943	0.327	-0.178	2.74
2103	19.77	251.42	17.61		1943	0.41	0.595	0.993
2125	246.87	103.42	7.68		1943	-1.4	-0.428	-3.41
2125	246.88	103.3	8.11		1943	0.502	-0.308	1.02
2125	247.18	99.07	13.82		1943	0.0282	0.662	0.524
2125	244.5	97.29	15.51		1943	0.997	0.0341	-2.45
2125	244.34	96.16	15.94		1943	-0.656	0.17	0.187
2125	244.39	96.15	13.57		1943	0.0144	-0.0248	0.0476
2125	245.65	96.83	13.16		1943	0.0865	0.0819	0.422
2125	247.56	96.74	14.15		1943	-0.168	0.385	-0.546
2125	247.87	97.19	14.94		1943	-0.0282	-0.0407	-0.285
2125	244.95	95.22	15.42		1943	-0.272	0.14	1.01
2125	244.77	95.08	16.18		1943	0.197	0.166	-0.808
2125	241.94	94.3	15.27		1943	-0.3	-0.957	-0.576
2125	242.32	94.67	16.2		1946	0	0	0
2125	241.15	94.03	15.49		1946	141.06	99.1	18.13
2125	242.25	95.08	16.42		1949	0	0	0
2125	239.28	93.55	16.47		1949	132.42	151.51	14.66
2125	243.93	94.81	16.2		1979	0	0	0
2125	244.69	95.98	14.7		1979	160.36	110.03	7.4
2125	245.94	95.43	17.84		1979	-0.57	0.282	-0.71
2125	244.63	95.38	15.01		1979	-0.436	-0.112	0.332
2125	247.07	94.43	16.96		1979	0.307	0.0119	-0.089
2159	235.38	107.68	16.68		1979	-0.0665	-0.0396	-0.911
2159	231.22	109.17	21.98		1979	0.499	-0.267	0.86
2159	231.83	109.64	22.13		1979	-0.00919	0.356	1.24
2159	229.64	108.22	21.96		1979	-0.31	0.034	-0.837
2159	228.13	106.75	21.33		1979	-0.361	-0.0539	-0.426
2159	227.64	106.95	21.49		1979	0.148	-0.0226	-0.218
2159	230.66	108.42	19.27		1979	-0.391	-0.475	0.377
2159	227.59	106.61	20.43		1979	1.22	0.35	-0.945
2159	227.38	107.33	19.67		1979	-1.75	0.357	0.181
2159	227.57	106.84	19.02		1979	0.893	0.0391	-0.946
2159	228	105.92	16.95		1979	-0.658	0.311	1.19
2159	228.47	106.75	18.25		1979	1.05	-0.738	-0.0747
2159	228.89	106.03	18.63		1979	-0.218	-0.455	0.673
2159	228.81	105.71	18.58		1979	-0.68	0.667	-2.04
2159	228.15	106.22	18.82		1979	0.124	-0.691	2.09
2159	226.22	106.69	17.66		1979	-0.591	-0.312	-1.11
2159	225.33	106.08	19.49		1979	0.203	0.0954	-0.139
2159	223.89	105.99	15.51		1979	-1.46	-0.676	0.0959
2159	225.83	107.12	17.52		1979	0.909	-0.534	-0.913
2159	225.44	107.73	16.73		1979	-1.89	1.01	1.96
2159	224.62	107.94	18.71		1979	-0.433	-0.557	0.463
2159	224.31	106.48	19.3		1979	0.181	0.307	1.71
2159	224.92	107.15	17.59		1979	2.54	-1.26	-0.331
2159	223.92	106.5	18.61		1979	4.12	-1.23	-1.61
2159	224.04	106.75	15.77		1983	0	0	0
2159	224.4	105.54	17.77		1983	196.82	40.22	37.12
2159	224.5	105.11	17.96		1983	-0.751	-0.654	1.13
2159	225.18	104.95	18.22		1987	0	0	0
2159	226.28	103.65	16.96		1987	131.21	57.17	2.84
2159	226.7	104.43	16.79		1987	0.658	3.44	2.47
2159	225.89	107.35	14.29		2006	0	0	0
2159	227.44	103.1	15.35		2006	230.35	112.68	14.24
2159	226.62	104.85	16.76		2006	-0.472	1.49	-3.34
2250	186.29	116.15	21.71		2006	0.652	0.413	-1.31
2250	185.57	115.41	21.95		2006	1.29	0.446	1.05
2250	187.08	115.58	22.71		2006	-1.54	-1.1	0.571
2250	187.05	115.74	22.7		2006	0.769	0.365	-0.0332
2250	187.49	115.98	22.4		2006	-1.83	0.153	-1.04
2250	187.85	115.33	22.77		2006	2.78	1.49	-1.13
2250	188.38	116.05	19.82		2006	-0.591	-0.614	1.25
2250	187.79	116.53	24		2006	-0.534	-1.39	-1.53
2250	187.92	116.12	24.22		2006	0.378	1.44	1.62
2250	188.72	116.99	20.5		2006	-0.61	-1.29	-0.885
2250	187.76	115.76	21.62		2006	-1.42	-0.376	-1.44
2250	187.44	116.4	22.07		2006	-0.967	0.104	-0.65
2250	188.85	116.57	17.23		2006	2.37	2.79	2.83
2250	188.68	116.82	19.57		2006	-0.02	1.48	0.225
2250	187.94	116.28	22.82		2006	1.77	3.33	5.11
2250	188.08	115.81	22.37		2012	0	0	0
2250	187.56	115.99	20.43		2012	163.97	12.85	26.75
2250	188.14	114.56	20.79		2012	-1.05	3.63	-0.564
2250	186.87	114.17	21.04		2012	-0.376	-3.86	0.756
2250	187.52	114.77	23.29		2012	-0.605	3.74	-0.907
2250	187.9	114.81	23.02		2016	0	0	0
2250	187.78	115.51	24.95		2016	162.19	107.74	4.3
2250	188.48	115.2	24.26		2016	0.937	-1.18	3.54
2250	189.35	117.08	25.52		2025	0	0	0
2250	187.61	116.1	22.1		2025	150.2	129.07	2.6
2250	189.75	117.22	25.23		2025	-1.83	2.39	0.345
2250	189.71	116.67	25.21		2025	0.269	-0.184	1.95
2250	187.61	114.84	22.06		2025	-1.38	-0.0404	-3.03
2250	187.77	114.43	23.38		2025	0.474	1.09	1.22
2250	188.99	115.78	26.56		2025	-2.6	-0.791	2.42
2250	188.48	116.18	26.81		2025	0.619	-0.626	0.412
2250	187.23	115.5	23.07		2028	0	0	0
2250	186.36	115.08	23.01		2028	143.06	101.93	18.16
2250	186.18	114.61	23.6		2032	0	0	0
2250	186.11	112.67	23.94		2032	144.29	168.27	16.53
2250	186.43	114.28	25.32		2032	-1.03	2.2	-1.67
2250	186.7	115.05	24.66		2039	0	0	0
2250	186.94	114.15	24.37		2039	195.33	151.25	14.42
2250	186.71	114.31	23.88		2039	2.08	-0.661	-6.3
2250	186	114	21.85		2039	-0.076	0.646	7.07
2250	187.39	114.53	23.54		2039	-0.522	-0.869	-1.92
2250	189.18	115.88	21.51		2039	1.5	0.124	-2.62
2250	187.56	115.02	21.48		2053	0	0	0
2250	188.2	116.16	20.04		2053	180.74	108.45	27.26
2250	190.95	118.11	15.89		2053	-0.967	-0.316	1.49
2250	188.43	116.63	18.21		2053	1.2	0.334	-0.263
2250	186.83	115.64	20.94		2053	-1.12	-0.969	-1.96
2250	185.74	114.74	16.77		2053	-1.74	-0.159	-2.58
2250	186.59	115.61	22.69		2053	1.1	-0.565	2.1
2250	189.89	116.92	15.56		2053	0.501	0.586	2.87
2250	185.43	115.61	20.06		2053	-1.26	0.39	-2.02
2250	188.55	116.57	14.57		2053	1.27	1.51	-0.43
2250	185.08	114.63	20.72		2053	0.206	-0.208	1.55
2250	187.95	115.68	23.91		2053	2.14	2.7	1.39
2250	186.92	114.9	23.22		2053	1.02	-0.286	1.93
2250	186.21	115.84	21.24		2156	0	0	0
2250	187.49	115.68	22.15		2156	166.42	153.58	14.36
2250	187.05	114.4	22.87		2156	0.133	-0.214	-1.43
2250	185.59	113.84	22.08		2156	0.17	0.0639	-0.956
2250	187.16	116.06	23.41		2156	-0.0212	-0.156	-0.646
2250	187.58	115.79	20.79		2156	0.199	0.102	0.103
2250	186.77	115.89	21.58		2156	-1.24	0.257	0.189
2250	186.13	115.65	19.77		2156	1.31	0.24	-0.128
2250	187.22	115.69	20.36		2156	0.224	-0.466	-0.717
2250	186.43	115.5	22.02		2156	-0.42	0.102	0.985
2250	186.84	115.28	20.35		2156	0.48	-0.0552	-1.87
2250	186.22	115.4	20.91		2156	0.289	-0.63	1.19
2250	186.82	115.71	21.55		2156	0.27	0.336	-0.874
2250	185.2	116.1	17.35		2156	0.0346	0.97	-1.23
2250	182.93	116.21	19.02		2156	-0.0744	-0.482	-0.112
2250	182.58	115.71	17.37		2156	-0.368	-0.25	0.844
2250	182.77	115.27	18.07		2156	-0.169	-1.2	-0.567
2250	182.84	115.45	16.69		2156	0.479	0.639	-0.00641
2250	181.89	114.44	17.45		2156	-1.18	-1.19	-0.593
2250	181.79	114.03	14.23		2156	1.01	1.51	0.922
2250	182.68	113.69	14.93		2156	-0.0587	0.342	-1.59
2250	183.15	114.37	15.03		2156	0.63	0.22	0.025
2250	181.58	112.72	16.65		2156	-0.555	0.17	0.154
2250	181.86	111.82	18.59		2156	0.51	-0.0112	-0.366
2250	181.39	111.59	17.07		2156	-0.57	-0.589	0.422
2250	182.34	112.71	17.11		2156	-0.237	0.171	0.958
2250	183.04	112.29	16.71		2156	0.194	0.179	0.0536
2250	184.54	113.64	18.6		2156	-0.148	-0.719	-0.964
2250	185.68	114.71	17.15		2156	0.135	-0.0767	0.238
2250	186.56	115.23	18.66		2156	-0.186	0.371	1.61
2250	187.55	117.61	18.39		2156	0.392	0.0901	-1.91
2250	187.8	118.36	17.2		2156	0.237	-0.00899	-0.366
2250	187.5	120.85	20.08		2156	0.35	-0.0449	-1.02
2250	187.59	121.25	18.24		2156	-0.71	-0.596	0.559
2250	188.74	122.39	22.84		2156	-0.0397	0.182	-0.343
2278	72.58	101.7	12.29		2156	0.279	0.534	0.81
2278	67.33	104.18	12.16		2156	-0.38	-0.203	0.662
2278	72.9	101.48	10.77		2156	0.15	-0.185	-0.997
2278	70.5	102.5	8.56		2156	-0.178	0.639	-0.755
2278	71.43	101.42	9.61		2156	-0.0866	-0.217	-0.0649
2278	71.92	101.46	10.87		2156	-0.215	-0.566	0.114
2278	71.52	101.62	10.25		2156	0.394	0.465	-1.06
2278	71.17	101.97	9.61		2156	-0.321	-0.102	1.13
2278	72.65	101.11	12.24		2156	0.338	0.59	-0.244
2278	72.24	101.31	10.14		2156	-0.148	0.00162	0.59
2278	72	100.91	11.81		2156	-0.314	0.758	-0.239
2278	72.13	101	10.68		2156	0.824	-0.421	-1.69
2278	71.29	102.16	10.17		2156	-0.382	-0.128	0.543
2278	70.24	102.75	6.42		2156	0.0751	0.705	-0.542
2278	72.3	101.32	12.47		2156	0.324	-0.285	0.273
2278	71.61	100.88	12.97		2156	-0.295	-0.00978	-0.34
2278	70.54	102.13	11.3		2156	-0.115	0.474	-0.35
2278	68.39	104.26	5.88		2156	0.299	-0.162	-0.146
2278	70.13	101.73	11.94		2156	0.0933	0.451	0.602
2278	70.17	101.93	11.49		2156	-0.178	-0.0914	-0.404
2278	68.68	99.56	16.66		2156	-0.529	-0.339	-0.157
2278	69.36	100.5	18.85		2156	0.524	0.197	-0.608
2278	70.35	100.34	18.68		2156	0.32	0.235	1.4
2278	71.36	100.89	19.17		2156	-0.55	-1.3	-1.02
[truncated: 6,129 more rows]

## Sheet: 5B
Track Volocity pDCs (μm/min)					Displacement Rate pDCs (μm/min)
PTCRA-EGFP Naive	PTCRA-EGFP PyYM	StingGt/Gt PTCRA-EGFP Naive	StingGt/Gt PTCRA-EGFP PyYM		PTCRA-EGFP Naive	PTCRA-EGFP PyYM	StingGt/Gt PTCRA-EGFP Naive	StingGt/Gt PTCRA-EGFP PyYM
4.206	1.116	3.09	3.546		0.1914	0.0324	0.1854	0.126
4.152	1.518	3.834	4.032		0.261	0.102	0.87	0.2988
6.18	1.62	3.876	4.5		0.3126	0.1608	0.555	0.237
3.042	1.764	3.9	3.426		0.0852	0.2556	2.01	0.1068
5.922	2.226	3.996	4.608		0.5016	0.2388	0.0558	0.1314
4.962	2.07	4.044	4.068		1.374	0.696	0.66	0.4062
5.874	1.32	4.17	3.21		0.636	0.3108	1.896	0.2436
9.12	2.148	4.176	4.446		3.558	0.1158	0.4458	0.3318
6.42	1.968	4.182	3.45		1.56	0.1986	1.698	0.2796
5.232	1.476	4.242	6.42		0.45	0.04842	1.164	0.804
7.32	3.312	4.308	4.884		2.736	0.4524	0.1578	0.3702
8.16	1.782	4.32	4.434		2.118	0.1698	0.2976	0.726
6.54	1.842	4.506	6.72		1.14	0.0834	0.5256	0.3114
7.38	2.262	4.512	5.55		0.4968	0.2922	0.78	0.804
5.484	2.238	4.524	4.464		1.626	0.2802	0.732	1.17
4.326	1.05	4.536	5.454		1.14	0.327	0.2262	0.2304
3.342	2.406	4.536	6		0.4758	0.0936	0.2802	1.608
8.04	1.932	4.542	3.756		1.422	0.147	2.31	0.4428
7.68	1.92	4.56	7.44		1.206	0.972	0.4884	1.974
5.802	2.892	4.62	6.3		2.298	0.702	1.158	4.212
10.26	2.364	4.662	4.806		0.96	0.696	0.666	0.2766
6.06	2.094	4.674	4.968		1.566	0.549	0.5838	0.1878
5.112		4.704	4.668		0.4194		0.678	0.4248
8.46	6.42	4.734	6.12		1.866	0.1416	0.5712	0.3222
11.22	7.02	4.776	3.9		2.664	0.63	2.454	0.3726
6.48	8.22	4.782	3.114		0.429	1.446	0.3198	0.18
4.638	6.78	5.028	5.868		0.5862	0.2448	0.744	1.152
6.66	8.46	5.034	4.788		0.768	2.022	0.5382	1.026
9.48	4.68	5.04	5.022		3.792	1.8	1.746	0.1752
5.532	3.42	5.04	3.738		0.66	0.0642	2.196	0.03936
8.58	4.674	5.04	5.256		5.352	0.1746	2.244	0.768
5.922	5.388	5.046	5.58		0.846	0.2112	0.81	1.266
3.456	5.19	5.1	7.32		0.858	0.864	2.1	0.4494
5.532	5.868	5.184	6.06		0.2262	0.726	1.176	1.176
8.22	6.18	5.202	5.688		0.918	0.084	0.2988	0.1068
8.58	9	5.244	5.568		3.234	3.894	0.3192	0.426
6.06	3.402	5.28	8.76		0.768	0.1164	1.296	0.5772
6.12	5.058	5.358	4.23		1.734	1.458	0.1752	0.4632
6.3	3.81	5.37	4.308		0.612	0.3468	0.2028	0.708
6.42	4.56	5.382	6.78		1.05	0.3234	0.846	1.134
9.06	6.84	5.388	5.28		2.058	2.442	4.728	0.4908
6.9	7.38	5.412	9.3		2.808	0.5676	0.3978	1.464
7.98	4.236	5.442	3.606		1.056	0.744	1.644	0.1554
6.72	7.38	5.508	3.966		0.678	0.822	2.142	0.0798
6.48	5.28	5.514	10.86		2.25	0.05868	1.14	1.812
7.02	5.808	5.526	4.254		1.194	2.208	0.888	1.836
3.672	6.6	5.544	6.36		0.1698	0.798	0.69	0.642
6.96	4.458	5.55	4.746		1.212	0.1836	2.334	0.2232
4.128		5.568	5.766		0.165		1.038	0.978
6.3	4.008	5.586	4.926		2.532	1.752	0.672	0.1002
4.434	2.304	5.592	4.338		0.1896	0.774	0.2694	0.486
6.36	8.4	5.604	6.36		0.4644	1.176	0.81	0.75
7.32	4.32	5.61	6.18		2.994	2.112	1.092	1.182
7.56	6.3	5.616	3.36		1.83	2.82	2.496	0.2796
11.04	7.44	5.622	5.94		5.064	1.686	1.518	0.3204
4.65	3.888	5.622	7.26		0.4602	0.4218	2.556	1.038
10.44	8.28	5.682	4.332		0.876	1.596	3.012	0.3978
7.26	7.68	5.682	4.506		1.062	1.386	0.2226	0.636
6.96	4.656	5.694	6.36		0.576	2.844	0.762	0.4248
6.06	3.738	5.712	3.432		2.766	0.69	2.196	0.4164
3.324	4.092	5.778	4.5		1.224	0.966	0.816	0.135
4.596	6.84	5.79	4.35		0.972	1.404	2.916	0.198
7.74	3.876	5.85	6.6		2.112	0.2802	1.17	0.5814
3.81	3.51	5.904	9.24		0.282	0.2364	0.924	0.768
5.34	7.44	5.922	9.42		1.416	1.248	3.18	0.906
5.082	3.846	6.06	3.492		0.642	0.1998	1.164	0.2622
9.72	4.248	6.06	5.844		6.12	1.002	3.756	0.528
5.97	1.41	6.06	6.72		1.482	0.2706	3.69	0.1704
8.94	4.8	6.12	4.98		4.302	0.636	1.47	0.336
5.334	3.9	6.12	4.374		1.002	0.525	0.5724	0.2814
6.54	5.358	6.12	4.554		4.2	1.512	3.384	0.1932
7.56	3.18	6.12	4.284		1.53	0.1518	0.612	0.096
4.932	3.174	6.12	5.67		1.602	0.372	1.632	0.0876
13.62	3.876	6.18	4.614		1.836	0.1314	2.148	0.1674
4.542	4.764	6.24	5.442		0.5268	0.2538	1.17	0.804
10.02	5.454	6.24	5.79		0.774	1.29	2.694	0.4266
4.53	8.4	6.3	4.746		0.3384	1.05	0.648	0.312
9.54	5.826	6.3	4.056		2.7	0.4362	0.828	1.074
8.82	4.47	6.3	6.12		1.074	0.354	1.224	4.146
6.96	2.604	6.3	4.488		0.876	0.327	1.71	0.4686
8.16	3.36	6.3	5.916		2.94	0.255	1.332	0.4968
12.18	4.656	6.36	3.762		3.984	0.5562	2.082	1.014
6.36	8.4	6.36	4.854		0.852	0.6	1.176	0.87
7.62	7.68	6.36	7.68		1.56	0.642	1.734	1.08
7.38	3.132	6.36	4.206		2.124	0.612	0.1308	0.5574
6.9	3.69	6.42	4.98		1.614	0.1806	0.708	1.572
8.88	5.172	6.42	5.13		2.424	0.4566	1.074	0.642
14.7	3.222	6.48	3.66		4.566	0.0756	0.2034	0.411
5.526	5.346	6.48	4.566		0.924	0.5172	0.918	1.314
5.928	7.62	6.48	5.292		2.22	0.3432	2.856	1.452
9.18	4.782	6.54			3.654	0.3498	1.71
7.74	4.236	6.54	3.45		2.394	0.1266	1.158	0.0942
14.88	4.938	6.6	2.454		2.4	0.1992	1.218	0.1992
15.54	4.068	6.6	3.846		5.37	0.05196	0.762	0.1392
7.92		6.6	2.664		1.608		1.08	0.126
7.14	3.192	6.66	2.598		0.2706	1.182	2.304	0.2022
9.06	6.48	6.66	4.44		3.294	0.762	0.66	1.17
6.24	6.96	6.66	5.946		3.426	5.124	2.466	0.2664
4.44	4.602	6.84	5.34		0.5286	1.116	1.794	0.3306
6.48	3.666	6.84	6.3		2.844	1.65	0.4104	0.672
7.38	3.654	6.9	7.08		3.54	1.164	1.29	0.4254
13.5	3.762	6.9	6.78		4.716	0.984	0.1986	2.604
7.26	6.24	6.9	3.948		2.4	2.406	0.768	0.5208
8.16	5.712	6.9	8.04		2.322	2.04	3.438	1.086
6.9	3.612	6.96	7.56		1.134	0.822	0.924	1.362
7.02	4.428	6.96	4.95		3.294	1.488	2.976	0.4008
4.014	7.44	6.96	7.56		1.092	0.954	0.78	0.684
5.556	3.384	7.02	4.2		1.752	1.17	1.02	0.4416
7.02	3.936	7.08	6.36		1.158	1.62	0.5082	1.446
7.2	6.96	7.08	4.062		2.814	1.878	1.164	0.894
9.48	6.18	7.08	3.636		2.55	0.3138	0.5988	0.774
5.496	5.952	7.14	4.968		1.17	1.182	2.55	0.4734
7.26	6.66	7.14	13.68		0.966	1.362	2.454	1.62
12	6.9	7.2	6.9		5.616	0.876	1.758	3.09
7.98	4.434	7.2	7.56		1.344	1.5	1.086	2.52
11.76	5.862	7.26	9		1.752	2.31	1.05	0.96
5.466	6.48	7.26	4.782		0.4716	1.92	0.4524	0.822
2.838	9.66	7.26	6.54		0.447	0.816	1.974	0.4158
6.6	3.582	7.32	3.63		2.85	0.852	0.255	0.0816
5.832	5.994	7.32	10.14		1.26	2.766	1.266	0.3102
7.74	9.18	7.32	6		0.876	3.984	1.29	0.3534
7.8		7.38	6.9		2.376		0.642	0.3078
10.98	3.75	7.38	5.484		3.756	0.1224	4.512	0.648
5.916	2.382	7.38	5.694		1.254	0.1356	1.824	0.5892
5.4	2.34	7.38	10.32		1.77	0.1266	1.356	0.96
6.72	3.588	7.44	6.9		2.796	0.1902	3.6	1.758
7.02	2.838	7.44	4.962		1.542	0.744	1.236	1.098
4.014	4.626	7.5	14.34		0.99	0.4752	4.398	1.962
4.5	2.658	7.5	3.546		0.471	0.138	0.942	0.852
5.85	1.986	7.5	3.024		1.35	0.05376	0.5454	0.3054
7.32	4.65	7.5	4.83		2.484	0.2544	2.376	0.222
8.52	3.858	7.56	8.88		3.324	0.63	0.756	2.262
7.74	8.4	7.56	3.858		2.484	2.514	2.832	0.744
	4.32	7.56	8.64			0.756	2.244	0.5778
4.134	4.908	7.62	4.932		0.05886	1.734	3.384	0.912
2.958	7.32	7.62	6.24		0.0828	0.4986	0.1854	0.882
5.166	4.518	7.62	12.48		0.1776	0.0828	0.708	1.872
6.42	4.272	7.68	4.956		0.726	0.3078	0.2454	0.846
8.1	5.79	7.8	6.24		0.816	1.194	0.762	0.4476
3.576	5.358	7.86	5.13		0.3126	0.606	1.482	0.3888
2.73	5.388	7.86	6.9		0.762	0.4128	0.786	1.704
5.214	4.662	7.92	2.484		1.26	0.714	2.406	0.3114
10.26	4.362	7.92	7.2		4.23	0.2208	3.87	0.1014
5.352	4.8	7.92	7.32		0.5154	0.078	2.556	1.53
6	4.11	7.92	2.802		1.974	0.465	2.892	0.2622
7.38	3.756	8.04	7.56		0.828	0.279	1.656	1.038
4.032	3.234	8.04	11.64		0.5442	0.246	1.032	3.666
5.298	4.128	8.1	3.138		0.9	0.4188	2.808	0.2544
3.234	5.064	8.1	7.14		0.948	0.5358	0.5136	1.254
9.3	4.128	8.16	5.904		1.818	0.972	0.996	1.818
4.512	7.14	8.16	8.58		0.2652	0.93	1.17	1.668
7.68	3.936	8.16	5.73		1.032	0.0654	4.482	0.5256
7.08	5.574	8.16	5.454		3.15	3.072	1.032	0.2556
5.538	4.068	8.22	5.184		1.53	0.774	2.076	1.068
4.326	4.92	8.28	4.656		1.242	1.116	3.168	0.396
8.76	5.196	8.28	10.08		1.158	1.488	0.894	1.026
8.28	3.306	8.28	9.24		1.314	0.684	1.026	0.93
8.76	2.244	8.4	3.666		0.768	0.099	1.23	0.2646
5.526	1.926	8.46	6.24		1.458	0.123	2.442	0.732
8.7	3.42	8.46	7.62		1.29	1.626	0.2592	1.932
5.964	5.148	8.46	6.24		0.708	0.756	2.934	1.41
7.92	4.068	8.46	15.42		1.26	0.912	1.002	0.846
4.578	2.97	8.58	7.86		1.14	0.3654	3.3	0.678
9.3	4.218	8.58	3.582		0.648	0.4272	1.002	0.3684
7.56	3.948	8.7	3.522		2.214	0.3486	1.236	0.66
8.4	5.868	8.7	10.32		4.482	0.3366	0.882	1.626
5.922	4.464	8.7	10.56		0.162	0.588	1.476	0.3726
2.238	6.6	8.76	3.87		0.1932	0.18	3.084	0.2952
7.38	3	8.82	5.298		1.41	0.321	2.226	0.618
8.4	3.222	8.88	2.226		3.312	0.804	1.08	0.3708
5.106	7.44	8.88	5.946		0.996	0.846	2.07	0.3582
5.19	3.816	8.94	10.08		0.2988	0.3048	5.256	0.672
9.84	2.808	9	6.66		1.992	0.555	2.376	0.858
6.6	3.18	9.06	3.642		0.666	0.132	5.838	0.1914
9.9	2.856	9.06	8.58		1.968	0.1626	7.38	1.752
1.812	2.544	9.06	8.76		0.1314	0.4632	2.184	0.978
7.2	2.646	9.12	6.72		1.014	0.1644	3.678	0.5514
7.92	4.284	9.24	9.78		0.642	0.2724	2.034	2.208
3.63	2.73	9.3	6.78		0.138	0.246	1.884	1.974
5.49	6.54	9.3	7.68		0.45	0.4896	1.362	1.062
11.4	3.378	9.42	7.26		3.342	0.2226	4.602	1.644
6.9	5.718	9.54	8.22		1.302	0.834	6.06	3.402
5.718	4.944	9.54	3.552		1.032	0.834	0.5052	1.254
11.52	4.038	9.54	3.366		4.896	0.678	1.074	0.1308
6.18	3.24	9.66	4.518		2.16	0.3084	4.146	0.5334
6.24	3.306	9.66	5.544		1.23	0.5454	3.516	1.248
6.18	4.278	9.72	6.12		0.762	0.654	1.464	0.708
6.54	5.802	9.84	8.76		3.582	0.996	2.508	1.47
8.1	3.054	9.84	4.05		0.63	0.84	1.248	0.642
6.9	3.696	10.02	5.466		0.4266	0.399	4.56	0.708
6.06	3	10.2	5.592		0.774	0.252	1.056	0.2016
5.748	5.13	10.2	4.194		1.518	0.477	3.396	0.3864
7.32	1.944	10.26	12.24		0.816	0.3744	2.304	5.274
5.886	3.606	10.32	6.42		2.112	0.714	4.092	1.326
6.66	3.084	10.44	4.254		5.31	0.294	3.954	0.69
9.6	4.434	10.5	3.012		0.3354	0.2076	1.242	0.558
4.98	3.606	10.5	7.5		0.2784	0.4116	2.238	1.182
6.42	3.492	10.74	4.812		3.294	0.3306	3.57	0.3948
6.72	3.216	10.98	3.054		0.66	0.612	3.456	0.5598
8.46	2.52	11.1	2.592		0.822	0.72	0.648	0.4686
4.05	6.3	11.28	6.78		0.846	1.878	0.2508	0.672
9.78		11.28	4.896		3.432		1.29	0.3738
6.12	4.536	11.28	5.136		0.4008	0.0834	7.8	1.41
7.14	4.776	12.12	5.814		2.16	0.1368	1.014	0.0936
6.96	5.928	12.54	6.96		2.748	0.672	2.262	0.984
5.19	5.718	12.6	5.544		0.3312	2.112	0.3648	1.038
2.742	4.524	12.66	8.58		0.1206	0.5592	1.728	2.562
4.824	5.1	12.66	5.58		0.72	2.286	8.1	0.5466
11.1	5.988	13.08	9.06		3.414	0.3678	1.65	1.182
7.08	4.152	13.98	4.62		0.48	0.1572	3.186	0.348
9.72	6.42	14.28	3.486		0.3954	0.528	5.346	0.1854
5.94	10.38	15.3	8.04		1.572	1.116	3.564	1.2
8.7	5.13	15.84	9.24		0.4818	0.3372	1.242	0.4572
5.892	9.36		4.71		1.956	1.152		0.4368
7.26	5.226	3.144	7.8		1.596	0.3276	0.186	1.704
10.08	4.62	6.12	5.742		0.5532	0.3618	0.4764	1.254
5.814	4.38	5.844	9.06		0.5976	1.098	1.128	0.924
8.4	6	5.052	13.08		4.722	0.3888	1.59	1.752
6.66	7.44	5.43	8.88		1.5	0.888	0.5436	1.074
6.48	5.946	5.508	8.94		0.648	0.2286	0.1698	0.1398
6.36	5.346	5.25	2.958		0.3306	1.416	0.075	0.612
7.44	5.178	6.36	7.98		0.165	0.852	2.622	2.892
6.06	8.52	7.44	10.8		3.114	1.206	3.42	1.578
6.18	4.374	6.42	8.04		0.05322	0.1746	0.2454	0.948
6.72	7.68	5.376	6.96		1.278	0.2862	0.4212	0.5226
4.608	3.888	4.728	6.12		0.1962	0.04908	0.618	1.062
4.986	5.4	7.2	11.64		0.3138	0.618	0.936	4.116
6.78	5.538	4.41			2.49	0.894	1.068
5.346	5.724	8.7	3.354		1.59	0.1188	0.66	0.3774
10.98	5.304	5.184	3.3		5.184	1.134	1.788	0.1578
5.856	4.182	5.088	4.494		0.762	1.428	1.326	0.5478
5.19	5.232	7.2	6.36		0.5034	0.612	1.44	0.1986
6.06	5.478	5.082	4.77		2.364	0.3594	1.23	0.828
7.38	6.6	5.688	4.866		0.762	1.308	1.194	0.2382
11.64	6.12	7.5	3.636		7.14	1.164	0.906	0.1638
7.86	4.98	8.76	4.716		1.692	0.2226	4.44	1.53
3.942	5.7	5.79	6.84		1.686	1.122	1.692	3.024
6.84	4.314	4.53	7.38		0.5568	0.2016	0.4842	1.068
6.24	5.022	10.5	7.56		2.466	0.84	3.984	0.84
7.02	5.202	4.896	8.16		4.224	0.357	0.42	2.274
11.82	5.484	6.96	10.14		8.7	1.176	2.046	1.92
6.78	3.282	6.24	5.28		0.2682	0.1146	0.4548	1.152
5.28	4.806	6.66	7.02		0.3426	1.506	2.148	1.746
4.968	5.826	4.146	6.06		1.776	0.726	0.4176	1.944
	6.54	6	7.8			3.312	1.326	0.618
5.46	6.12	4.89	5.016		0.4278	0.84	1.212	3.216
6.12	5.388	7.98	8.88		0.33	0.732	4.884	0.3042
3.174	4.932	4.512	8.22		0.0858	0.3198	0.4752	1.944
6.6	4.698	3.75	7.14		0.3348	1.038	1.038	2.07
7.26	4.236	4.026	6.6		1.002	0.636	0.906	2.658
4.224	3.18	7.38	4.89		0.1638	0.2718	3.534	0.714
8.46	4.422	4.746	7.2		0.5982	1.41	0.948	0.912
5.748	4.728	5.586	4.05		1.224	0.5376	1.002	0.408
4.686	6.54	7.8	6.66		0.4158	0.852	2.658	0.774
7.02	7.32	8.22	8.58		0.678	1.38	0.888	3.18
5.886		8.28	8.46		0.1158		1.38	4.272
4.866	3.894	4.248	11.52		0.4902	0.2556	0.972	1.314
5.274	5.316	6.96	8.34		0.522	0.708	3.042	0.912
5.496	5.388	5.784	4.794		0.306	0.1632	0.606	0.321
5.316	6.9	6.48	6.24		0.984	0.642	3.072	0.3288
3.564	6.06	5.526	5.784		0.3744	0.726	2.856	0.618
10.8	9.12	5.07	12.6		2.232	0.5988	0.918	1.026
12.96	10.2	6.48	6.18		1.602	0.5976	3.156	0.672
8.4	4.224	4.614	5.784		3	1.356	0.3858	1.218
8.04	5.958	8.94	9.06		1.074	3.294	2.394	1.074
8.16	5.838	5.544	9.18		0.5394	0.918	1.026	1.2
6.42	9.06	4.944	6.42		0.3336	0.936	0.996	1.122
8.7	6.36	8.28	7.86		0.3234	1.308	1.32	0.666
9.72	4.896	7.08	5.658		2.754	0.708	1.074	0.822
7.86	3.924	5.598	3.348		0.966	1.068	1.452	0.4074
10.68	5.652	7.92	7.08		0.9	1.062	1.674	0.906
5.232	6.84	7.32	6.6		0.606	1.302	4.218	1.146
7.68	6.42	6.66	8.58		0.5688	0.87	3.228	1.848
8.52	4.512	7.68	3.96		1.32	0.1716	1.434	1.11
9.06	6.6	3.39	7.38		1.176	1.176	0.93	2.628
9.24	7.44	4.56	6.96		0.5046	1.038	1.374	4.65
5.112	6.9	6.36	4.704		0.33	1.296	0.738	0.678
7.44	8.52	7.44			0.786	2.31	3.102
5.376	4.17	10.38	4.494		0.1938	0.3042	2.982	0.0744
10.68	4.464	5.232	4.038		1.86	0.3984	0.2016	0.207
9.12	5.388	7.02	4.056		0.84	0.1602	1.488	0.2484
8.28	8.1	5.652	4.2		1.398	2.76	1.962	0.5406
5.748	6.72	10.92	3.828		1.02	0.972	6.9	0.168
6.3	6.3	5.892	3.24		0.936	0.225	0.786	0.0744
6.66	6.96	8.34	4.782		0.1116	2.286	3.474	0.792
7.92	6.18	6.36	5.514		3.39	0.816	0.888	0.1404
10.56	6.3	12.48	5.364		0.99	1.932	3.684	0.1854
8.46	5.034	10.26	4.446		1.956	0.858	5.508	0.141
5.88	6.3	6.36	8.04		0.798	0.774	2.676	0.84
7.74	5.916	4.95	6.84		2.346	0.2886	1.008	0.3096
5.952	5.076	6.3	6.6		0.4656	0.03048	2.982	0.4668
6.72	6.06	9	5.484		0.636	1.782	1.152	0.075
8.04	6.78	5.694	5.922		3.696	2.298	2.364	0.2688
8.1	7.02	5.784	6.78		0.4662	0.4596	1.53	0.624
11.52	4.098	5.646	5.922		2.1	1.134	1.53	1.74
10.38	5.478	6.78	2.892		7.38	0.9	3.432	0.3726
8.88	6.06	13.62	8.76		1.458	0.2574	3.198	1.74
6.9	5.982	5.94	8.52		0.5472	0.612	2.346	0.5466
7.68	8.7	6.6	11.82		4.878	0.5208	1.26	0.3726
7.14	7.8	6.3	5.7		1.878	4.992	1.11	0.339
6.18	9.66	7.38	4.83		2.016	1.68	3.672	0.1392
9.78	7.56	8.76	9.6		1.17	0.492	1.644	0.486
6.9	5.784	5.244	7.2		2.184	0.4308	1.83	1.392
10.8	5.412	6.48	4.926		7.32	0.2994	1.752	0.54
8.1	7.98	9.9	4.764		1.896	0.738	4.254	0.702
7.5	4.308	9.3	7.74		0.4398	0.3564	4.704	1.128
4.518	7.74	5.982	4.806		0.5184	3.162	0.666	0.3474
6.9	8.28	4.866	11.46		0.918	0.102	2.718	1.32
5.742	6.3	7.68	5.22		1.734	0.786	4.71	0.924
7.26	4.758	3.354	13.02		3.99	0.1806	0.942	1.608
10.74	10.74	6.12	5.928		4.362	0.1116	2.37	0.852
7.92	5.544	6.9	5.958		2.196	0.4296	1.23	3.132
6.6	3.762	6.06	5.382		1.29	0.4614	0.756	1.692
4.566	7.32	7.32	4.728		0.2172	3.528	1.374	0.3972
10.86	5.472	7.86	7.74		1.122	0.81	1.824	0.4734
7.92	5.814	8.4	9.6		1.518	1.782	3.024	2.346
6.84	8.7	6.78	13.32		0.666	1.014	2.64	2.13
4.704	5.112	3.648	21.12		1.59	0.1788	1.05	5.268
9.06	5.334	6.96	8.46		2.79	0.3828	1.602	1.236
11.88	3.636	6.24	4.818		0.774	0.828	4.176	0.3246
10.2	8.16	9.3	7.8		5.022	1.194	3.132	0.5976
3.918	6.96	5.22	5.028		0.3918	2.01	1.794	1.26
7.8	3.63	2.886	10.02		1.938	1.356	0.3912	4.224
9.66	8.76	6.36	4.518		0.618	2.796	1.284	2.61
9.36	4.26	3.93	5.844		2.316	0.336	0.882	0.2046
7.98	6.12	14.46	5.226		3.678	0.912	3.696	1.62
12.84	4.254	10.26	3.408		2.772	0.978	5.37	1.584
5.13	7.08		7.5		0.369	0.87		1.14
7.74	8.64	4.074	2.976		1.536	0.4692	0.4038	0.3822
9.96	5.784	3.984	6		2.004	1.572	0.2364	1.626
9.18	7.44	4.08	4.968		0.3978	1.014	0.726	0.2688
6.18	5.892	3.996	4.176		1.314	0.507	0.792	0.774
12.18	5.334	7.14	10.62		1.17	0.984	1.422	1.194
6.48	6.06	6.72	13.32		0.888	0.888	2.586	2.472
9.48	10.08	6.96	5.64		0.5856	1.584	1.404	0.87
8.46	5.16	4.734	7.62		0.606	0.762	0.5424	2.19
10.92	5.028	9.42	4.08		1.152	1.056	0.882	1.086
8.64	7.08	6.06	5.76		4.458	1.398	1.2	1.146
6.84	6.66	9.42	10.32		2.226	1.566	3.396	0.636
	7.26	3.966	6.9			1.458	0.84	0.339
	9.72	6.72	7.2			3.036	0.636	0.822
	9.66	7.38	6.18			4.434	2.256	1.128
	6.84	11.1	4.722			1.59	3.342	0.648
	5.73	5.946	7.14			1.782	1.026	0.3732
	10.08	3.684	11.34			0.804	0.1026	1.056
	7.2	6.54	4.716			2.064	1.086	0.1842
	4.602	10.14	7.26			2.142	4.26	0.684
	9	3.126	12.24			1.386	1.062	0.393
		7.8	11.04				4.788	2.766
		10.32	3.222				2.844	0.774
		10.44	8.7				2.514	1.224
		5.148	10.02				0.942	0.936
		6.12	8.22				1.056	0.3264
		3.798	3.534				1.302	1.248
		5.274	7.26				1.662	0.696
		9.66	4.788				1.314	0.2466
		4.686	7.56				1.152	0.894
		7.44	3.498				1.518	0.4158
		7.62	8.4				3.378	1.536
		7.32	3.222				4.194	0.558
		7.02	10.68				3.396	2.166
		5.562	8.58				1.08	0.762
		5.658	9.66				0.3762	1.068
		6.18	5.736				2.358	0.4416
		4.254	8.1				0.4626	1.452
		4.32	8.34				0.804	0.714
		8.04	6.12				2.13	0.285
		6.12	5.178				1.8	2.91
		8.7	9.18				4.296	0.3552
		4.662	7.2				0.1584	2.046
		9	13.5				2.916	1.662
		9.6	6.72				4.836	0.45
		4.404	5.766				1.62	0.942
		7.38	6.18				2.208	1.11
		6.48	4.494				0.3696	0.4008
		4.92	4.89				1.356	1.704
		9.78	3.198				3.282	1.602
		5.538					0.612
		7.32	3.9				1.482	0.1986
		4.98	3.09				2.172	0.288
		4.206	5.418				0.2328	0.4374
		6.06	3.366				0.3882	0.2676
		3.126	5.802				0.4644	0.4896
		9.12	4.416				2.412	0.4722
		11.34	4.584				0.828	0.2868
		5.112	6				1.8	0.3924
		9.3	4.878				2.73	2.304
		4.818	5.856				1.062	1.128
		5.22	3.606				0.99	0.4716
		5.154	3.456				1.092	1.974
		12.72	5.1				4.17	2.628
		6.96	4.908				0.72	0.63
		8.88	6.12				1.314	0.624
		4.596	6.54				1.224	1.542
		4.17	4.776				0.942	0.612
		5.046	8.46				1.866	0.2574
		6.36	4.638				1.836	1.116
		4.524	7.2				2.358	2.1
		7.02	3.444				2.802	1.842
		11.16	6.6				1.098	1.872
		4.896	7.92				1.056	0.393
		9.42	6.66				2.784	0.5718
		6.24	7.92				0.4482	2.73
		7.08	4.44				0.96	0.3918
		6.78	4.968				0.78	1.008
		10.32	7.74				4.8	1.128
		5.898	7.62				2.652	1.506
		14.1	5.742				1.884	0.618
		7.38	10.26				0.876	1.974
		4.878	3.612				1.77	1.806
		10.44	10.68				5.856	0.606
		6.12	5.124				0.714	1.218
		10.08	7.56				2.232	2.232
		6.12	5.604				4.434	1.242
		12.36	5.532				1.65	0.852
		9.12	7.62				3.054	2.034
		6.42	4.356				1.452	0.822
		7.02	8.22				0.5268	1.41
		5.622	4.698				1.446	0.5136
		6.54	3.918				0.5682	2.73
		5.466	11.88				0.5886	0.726
		7.5	6.6				2.814	0.708
		5.316	7.08				0.1182	1.14
		4.356	5.736				0.4266	1.77
		8.7	6.18				1.452	0.612
		5.106	7.8				2.934	1.728
		8.88	6.54				3.552	0.75
		10.8	4.59				2.172	1.656
		6.06	5.142				0.1494	1.116
		5.97	4.374				1.32	1.752
		3.54	7.68				0.708	0.672
		6.42	5.088				3.066	0.171
		6.66	7.02				1.188	0.816
		4.95	6.42				0.624	1.56
		7.26	3.636				3.546	1.632
		7.44	5.076				0.858	2.718
		5.508	6.36				1.548	0.768
		6.24	5.952				0.99	1.458
		7.62	6.24				5.016	1.062
		9.78	5.292				0.3654	1.032
		4.89	5.478				1.674	1.95
		4.404	6.06				2.01	0.4452
		4.206	5.286				1.38	0.666
		7.44	5.82				0.3702	0.906
		3.444	7.56				0.2142	1.392
		10.08	9.36				1.644	1.368
		5.124	10.02				1.572	2.046
		5.766	4.266				0.3156	0.5898
		9.9	11.64				4.578	1.704
		7.68	4.482				1.908	0.906
		11.16	5.754				5.07	0.84
		5.502	4.464				0.5376	0.768
		4.356	4.818				0.63	0.5688
		6.48	3.882				0.3906	1.518
		6.9	9.12				0.5286	1.362
		7.74	5.964				1.224	0.2202
		6.36	8.04				2.346	1.266
		4.878	7.56				1.614	0.1374
		8.58	11.4				2.466	1.824
		8.88	12.18				1.092	3.114
		8.28	7.26				1.098	2.736
		7.56	2.28				1.548	0.243
		3.024	8.88				0.87	1.632
		10.32	4.998				0.648	0.75
		4.362	4.29				1.416	0.1926
			5.022					1.152
		3.576	5.538				0.2232	0.924
		2.952	3.06				0.1074	0.3258
		3.816	2.94				0.0954	0.1368
		4.614	4.644				0.1494	0.4608
		4.194	3.342				0.69	1.476
		5.148	6.42				0.2088	1.764
		6	4.872				0.3324	1.134
		4.398	11.04				0.2274	2.766
		9.24	3.066				0.4614	1.17
		7.38	5.502				1.002	1.11
		6.36	4.128				0.1956	0.4428
		5.718	3.45				1.95	0.5142
		5.256	9.54				2.688	0.5862
		5.292	8.52				0.1734	1.698
		3.384	6				1.8	0.696
		4.278	5.478				0.288	0.882
		6.12	8.04				1.428	0.906
		4.716	10.8				0.804	0.786
		4.572	8.34				0.3354	1.596
		7.08	7.86				0.612	0.912
		13.02	7.68				6.6	2.334
		7.5	10.92				0.936	3.27
		7.14	8.58				1.278	3.624
		4.806	5.25				0.543	0.5844
		6.24	7.26				2.502	3.978
		4.332	6.06				0.2004	0.5226
		4.998	6.66				0.5202	0.876
		5.688	8.34				0.3624	2.646
		8.34	4.47				0.3036	1.464
		7.38	6.66				0.972	2.796
		7.2	6.3				0.936	0.93
		6.6	8.46				0.714	1.854
		4.566	4.236				0.654	1.104
		4.812	5.442				0.189	0.702
		6.06	10.14				0.1668	0.618
		5.394	5.31				3.246	0.2538
		3.924	8.16				0.342	1.554
		6.36	4.47				1.836	0.684
		4.278	5.142				0.528	0.774
		4.47	12.66				0.3144	1.518
		7.26	8.82				1.122	0.774
		6.48	8.64				0.357	1.236
		7.26	5.772				0.3228	1.5
		6.6	4.278				0.3624	1.17
		5.082	5.946				0.9	1.692
		7.2	3.57				3.096	0.2622
		7.5	5.472				1.716	0.3798
		4.38	4.992				0.3924	0.924
		8.4	6				1.404	0.5886
		5.382	5.298				1.674	1.002
		5.424	9.9				1.314	0.1434
		5.832	5.052				0.714	1.008
		5.052	4.818				0.3192	1.266
		7.5	9				0.2778	2.958
		5.424	5.61				0.93	0.96
		6.12	4.566				0.3918	0.5442
		3.93	5.376				1.956	0.654
		4.728	4.764				0.81	0.72
		6.72	5.328				0.846	0.828
		5.076	11.46				2.37	0.3156
		6	5.67				0.678	0.4098
		4.242	7.02				0.294	0.678
		5.49	6.06				1.884	0.27
		8.94	13.08				0.2484	2.472
		5.544	6.12				3.504	2.322
		7.86	9.06				0.666	0.3894
		4.848	5.58				0.5718	1.32
		10.14	5.148				1.332	0.66
		10.5	11.58				0.4668	1.248
		6	4.188				2.148	0.744
		10.32	10.62				5.496	2.616
		8.76	6.42				2.964	1.104
		4.164	7.74				0.1662	0.942
		7.68	3.756				2.994	1.842
		8.28	6.54				0.9	0.69
		5.508	8.34				0.42	4.41
		4.872	5.502				0.4218	0.4158
		4.146	5.814				0.666	1.968
		6.18	8.52				3.306	1.158
		6.18	6				0.966	0.2502
		4.014	5.418				0.846	0.4212
		3.42	4.164				0.2382	1.542
		3.504	5.58				0.186	1.434
		1.518	3.684				0.2172	0.0666
		6.3	6.72				0.4002	1.326
		6.06	7.02				1.206	3.906
		9.6	5.376				1.974	0.5742
		6.84	8.1				1.686	1.002
		4.656	8.28				0.4194	3.6
		5.208	3.822				0.3372	0.768
		5.25	5.49				0.3648	1.8
		7.92	7.26				0.846	1.5
		10.38	7.14				3.306	1.704
		4.614	4.62				0.0972	1.002
		5.13	9.24				0.3108	0.924
		8.04	7.68				1.8	2.112
		7.2	5.73				0.78	1.038
		4.992	5.01				0.984	0.387
		6.18	4.236				0.5034	0.972
		5.988	7.74				1.008	4.272
		5.904	6.06				0.93	0.822
		8.58	6.96				3.024	0.852
		9.12	3.282				2.418	0.4344
		7.08	5.826				3.132	1.59
		8.94	6.84				3.24	2.586
		7.44	3.972				2.022	0.5556
		8.7	8.28				4.164	1.536
		6.54	7.98				0.4404	0.555
		9.42	4.188				4.086	0.1176
		10.8	9.9				2.508	4.368
		6.06	7.68				0.846	0.678
		7.74	8.88				1.998	0.804
		4.206	5.442				0.96	2.076
		5.634	8.52				1.134	2.316
		4.482	7.62				1.158	1.842
		4.602	9.42				0.4716	3.858
		3.828	4.428				0.462	0.354
		6.78	5.94				0.4134	1.398
		3.474	10.32				0.3378	0.96
		4.338	7.74				0.3942	2.172
		4.386	7.98				0.3294	3.636
		7.26	6.72				2.16	3.378
		5.886	7.14				1.086	2.112
		4.764	5.298				1.326	0.726
		3.9	5.7				0.3552	1.554
		6.3	5.418				2.556	0.195
		6.6	6.96				1.746	0.606
		9.42	3.36				2.028	0.72
		4.56	5.856				0.2814	1.62
		7.02	5.796				2.982	1.686
		6.66	10.98				4.752	1.812
		8.1					2.016
		8.16	3.696				1.002	0.1506
		3.054	2.208				0.528	0.2052
		3.792	3.042				0.4782	0.2004
		9.48	3.528				0.792	0.1596
		7.08	3.996				1.872	0.1704
		6.72	5.982				2.802	0.108
		8.46	4.236				0.876	0.2226
		8.34	5.04				2.532	0.618
		6.36	4.338				0.984	0.5688
		5.856	3.708				0.2262	0.4194
		9.24	5.34				1.536	1.17
		6.54	6.24				1.02	0.354
		6.06	7.14				0.3876	0.5868
		4.734	2.706				1.896	1.428
		6.84	8.46				1.878	0.3522
		6.9	5.724				1.356	1.422
		10.56	5.034				6.48	0.804
		6.78	7.32				1.62	2.628
		7.86	5.568				1.812	0.654
		7.26	8.4				1.056	1.806
		8.94	7.74				2.1	0.2766
		3.15	6.96				0.3282	0.5064
		3.732	6.36				0.744	2.166
		8.94	4.488				3.426	0.1596
		5.202	7.32				1.008	1.728
		3.18	4.62				0.2658	0.798
		6.78	5.436				1.158	0.4998
		3.318	4.962				0.4302	1.104
		9.06	8.94				1.068	0.702
		5.802	8.34				0.918	0.1266
		7.2	4.344				2.49	0.2142
		6	3.954				0.1734	1.002
		3.744	6.72				0.3582	0.876
		9.12	6.12				4.764	1.23
		6.36	6.12				4.512	0.786
		8.34	4.65				0.654	0.69
		5.61	8.16				0.336	0.3348
		4.422	10.92				0.453	0.5082
		5.952	5.37				3.756	1.398
		5.586	9.84				1.944	0.387
		4.392	4.242				1.308	0.3564
		8.22	7.62				0.5388	0.4956
		7.14	6				0.2652	0.72
		7.32	7.98				0.78	0.96
		6.48	4.218				2.49	0.828
		8.1	4.518				3.906	0.696
		7.38	3.306				1.068	0.4242
		8.28	7.74				0.84	0.1554
		5.4	6.72				1.83	1.056
		5.922	5.94				0.684	1.722
		4.998	8.7				0.1764	0.744
		9.96	7.38				1.746	1.872
		6.06	4.62				1.428	0.618
		6.36	5.79				1.134	1.704
		4.656	9.6				0.3468	0.3432
		6.24	3.294				2.04	1.416
		7.5	5.1				1.404	0.2478
		5.328	5.148				0.111	1.056
		3.624	4.626				0.2304	1.818
		3.81	5.106				0.66	2.16
		5.568	10.38				0.5484	1.218
		7.8	3.642				0.648	0.726
		7.02	5.568				2.574	1.59
		5.712	2.412				0.5034	0.5814
		2.91	5.388				0.678	2.904
		3.288	7.62				0.4242	0.81
		3.33	5.97				0.4104
		4.272	9.48				0.5874	0.5124
		4.398	8.46				0.2298	0.138
		6.6	4.374				0.2538	0.2658
		7.62	3.93				1.572	0.1566
		4.47	4.332				0.726	0.429
		6.96	5.688				3.738	0.2148
		6.9	5.862				1.614	1.128
		4.356	8.52				0.2358	0.1602
		6.72	5.412				1.26	0.3072
		4.17	9.12				0.2058	0.2706
		5.394	9.18				1.35	0.864
		5.454	5.256				0.786	0.54
		7.92	10.26				0.666	2.646
		7.08	5.79				2.178	0.495
		5.364	6.9				0.708	0.852
		3.33	7.32				0.606	1.26
		8.4	6.6				0.585	1.878
		7.38	7.56				0.81	0.429
		6.42	4.086				1.476	2.394
		4.674	8.76				0.1296	1.866
		7.92	4.296				0.732	1.242
		4.11	7.44				0.57	2.238
		5.112	5.892				1.878	2.046
		4.716	4.26				1.38	0.834
		7.98	5.832				1.932	1.566
		4.68	3.684				0.3924	0.4368
		5.382	5.958				2.208	0.3684
		7.62	10.08				0.786	0.3876
		6.24	5.274				1.65	3.174
		3.738	9.06				1.236	1.44
		4.908	4.98				0.243	1.782
		6.06	4.962				1.206	0.5238
		4.41	6.24				0.3294	0.84
		6.3	12.54				0.5892	1.008
		4.386	6.54				0.1932	0.828
		6	9.06				2.034	0.1434
		4.11	5.658				1.23	0.396
		4.218	4.194				2.244	2.076
		8.94	7.44				2.814	1.11
		6.66	6.12				1.554	3.336
		6.9	5.148				0.3414	1.026
		4.752	9.24				0.459	0.804
		6.24	5.958				0.5958	0.5484
		5.166	8.88				0.774	1.272
		5.916	9.3				0.768	0.2868
		5.082	6.42				1.152	0.4908
		5.7	5.31				0.4314	0.2706
		6.24	3.882				1.344	0.744
		7.14	4.272				3.156	0.5562
		5.124	7.98				0.1194	1.566
		3.786	5.778				0.4518	0.402
		8.28	5.874				0.852	5.766
		3.6	4.5				0.4386	2.004
		6.42	6.12				1.644	1.032
		5.394	6.36				0.744	1.896
		7.44	6.54				1.674	1.05
		7.56	4.206				1.284	1.26
		6.9	7.8				2.604	1.35
		4.38	7.26				0.237	2.106
		6.36	8.28				0.696	0.3444
		6.66	6.96				2.034	2.832
		5.454	6.84				1.716	0.762
		2.814	5.52				0.2664	0.756
		5.628	10.26				0.3222	0.399
		5.586	10.26				1.542	0.1584
		5.406	5.52				0.762	0.4026
		6.84	5.382				3.822	0.966
		7.62	4.338				2.616	2.694
		10.32	6.48				1.368	0.4722
		5.928	4.242				3.894	0.666
		6.12	5.238				1.506	0.3018
		7.14	11.88				1.77	1.986
		5.754	6.9				2.232	0.852
		8.88	9.78				0.5928	0.5196
		5.838	5.922				1.92	0.87
		3.924	4.422				1.326	2.268
		4.272	4.476				0.72	1.626
		7.26	5.766				4.8	0.954
		5.106	7.02				2.4	2.124
		7.44	11.34				2.412	8.76
		10.8	7.44				0.978	0.66
		6.24	6.48				0.294	0.678
		6.96	7.92				0.66	0.786
		5.73	3.534				1.332	0.5976
		4.836	6.72				0.372	3.732
		5.106	8.1				0.894	0.4446
		9.96					6.24	0.624
		7.8	6.36				2.694	0.924
		5.136	2.706				1.164	0.786
		7.08	4.68				4.896	1.098
		7.38	4.998				3.906	0.69
		7.08	3.51				0.978	0.882
		6.78	6.96				1.32	0.213
		4.974	5.886				0.72	0.5046
		9	7.5				0.4602	1.29
		4.95	5.016				1.662	0.744
		5.574	4.818				0.5274	5.49
		5.088	3.63				1.866	0.726
		5.166	5.724				0.936	0.792
		4.938	6.06				0.942	0.4254
		7.92	7.2				1.566	2.028
		7.62	4.962				1.206	1.206
		8.82	5.034				1.224	4.65
		4.872	8.58				1.182	0.45
		6.84	6.06				0.996	0.528
		4.764	6.6				1.158	3.576
		10.14	4.356				4.866	0.5022
		2.904	4.92				0.3984	0.768
		6.36	5.658				2.232	0.984
		7.5	6.12				0.4014	0.5688
		10.2	4.44				7.56	0.504
		8.1	4.35				3.69	1.47
		9.36	6.12				6.06	0.624
		4.758	5.442				0.4614	1.176
		5.292	3.714				0.4764	0.978
		8.1	13.14				0.798	0.684
		7.98	6.42				2.982	1.26
		4.632	10.08				0.9	0.648
		5.982	7.98				1.902	0.978
		6.3	6.6				2.898	0.69
		7.26	4.212				2.268	0.654
		7.56	3.342				0.4368	1.284
		4.746	5.64				0.3786	0.5016
		6.36	8.64				1.152	2.172
		3.576	7.98				1.68	1.05
		7.14	14.52				2.136	1.194
		5.1	3.252				0.1572	1.116
		3.522	4.368				0.5406	0.2382
		6.48	7.68				0.648	0.2874
		7.8	8.58				1.29	1.008
		8.28	3.072				0.732	0.828
		5.616	7.08				0.3192	0.732
		9.24	5.934				3.366	0.672
		6.84	7.98				0.912	1.086
		4.65	8.4				0.63	0.774
		7.56	8.1				2.61	0.99
		5.526	8.82				0.768	1.152
		4.194	7.38				1.542	0.684
		6.36	7.68				2.76	1.326
		6.36	5.448				1.032	3.228
		5.712	6.3				0.9	2.646
		6.96	6.18				0.4638	1.746
		8.16	7.02				5.706	0.4452
		8.22	6.66				4.614	1.404
		5.358	9.36				0.732	1.83
		3.876	6.96				0.111	1.746
		5.958	11.46				0.4944	0.792
		6.84	5.82				1.926	1.14
		10.56	5.136				1.272	0.972
		4.71	7.26				0.606	2.034
		3.99	6.24				0.846	0.864
		5.094	7.08				0.3186	1.488
		4.794	9.06				1.602	5.148
		7.68	7.8				2.022
		7.26	6.48				3.126	0.3336
		8.64	12.3				0.5808	0.3084
		6.18	6.84				2.07	0.4578
		6.6	7.2				3.114	0.63
		8.04	11.28				5.388	0.726
		5.064	7.62				2.286	0.2418
		6.42	5.256				0.846	0.531
		6.96	6.42				4.902	0.3378
		7.44	8.34				1.074	0.3768
		7.02	9.96				1.476	0.5016
		7.08					0.4704	0.3834
		4.788	2.922				0.3846	0.5706
		7.5	3.6				3.528	0.4242
		7.08	3.726				3.288	0.5934
		7.5	3.126				4.056	0.4614
		8.76	5.832				5.826	0.2904
		11.22	3.624				1.65	0.2856
		5.13	4.542				3.6	0.0876
		8.46	4.128				0.3072	0.5646
		6.96	2.646				0.948	0.444
		7.8	2.994				1.062	1.032
		5.994	6.84				0.2544	0.5352
		6.66	3.618				3.552	1.218
		9.18	4.116				0.2292	0.864
		3.504	3.714				2.118	1.398
		2.298	6.06				0.1698	0.708
		5.976	2.706				2.094	0.87
		2.724	8.28				0.075	0.612
		6.9	6.06				0.3006	1.056
		5.772	5.592				2.712	1.17
		4.668	5.214				2.016	0.87
		5.286	5.064				0.9	2.256
		6.66	4.704				0.2196	4.458
		3.594	5.244				0.666	1.2
		9.96	6.9				4.626	0.1968
		7.56	7.56				0.2436	0.273
		5.778	4.956				2.172	0.84
		4.344	6.54				0.291	0.5496
		9.06	3.36				4.032	2.064
		10.02	4.482				5.592	0.714
		6.78	4.308				0.762	0.1542
		8.04	8.34				0.936	1.38
		6.84	7.02				2.124	0.555
		6.54	4.512				3	0.4992
		7.2	4.068				2.346	0.5328
		3.984	4.554				1.902	0.78
		3.576	7.56				0.672	1.218
		4.11	8.22				0.2562	1.224
		4.356	3.102				0.4926	1.62
		3.246	5.112				0.9	1.338
		4.422	10.02				0.207	1.452
		6.84	4.476				1.938	0.2838
		5.316	3.018				1.938	0.96
		8.34	4.626				5.208	0.2094
		9.54	4.83				2.082	1.2
		5.946	6.6				3.378	0.5544
		6.48	5.118				0.5958	0.948
		2.988	6.84				0.834	0.4998
		6.84	4.854				2.322	1.206
		4.92	6.84				0.2304	1.086
		8.94	8.1				1.548	0.84
		5.94	3.462				2.748	1.128
		11.7	4.758				3.27	2.046
		12.9	4.092				4.596	0.4578
		6.42	5.772				1.812	0.3036
		9.36	6.18				6.48	2.406
		8.16	5.262				2.604	0.864
		5.04	5.124				0.762	0.966
		5.028	2.58				0.96	2.184
		3	7.02				0.408	0.672
		7.38	2.85				1.116	1.284
		8.46	5.442				3.51	0.5136
		4.602	5.772				1.614	3.24
		9.6	3.288				0.81	1.332
		7.86	5.328				4.296	1.182
		8.46	5.754				3.264	2.016
		7.86	5.658				1.62	3.186
		4.86	2.928				0.702
		9.12	4.932				1.068	0.612
		5.46	4.242				0.597	0.441
		3.924	4.488				0.5952	0.2532
		3.24	10.38				1.062	0.2418
		5.664	8.28				2.598	0.2526
		7.86	6.18				0.2772	0.3468
		3.882	5.532				0.66	0.3972
		6.06	5.622				1.044	0.3978
		5.826	6.36				2.916	0.4488
		8.22	5.844				2.406	0.1638
		7.32	6.54				1.446	1.542
		5.466	7.62				0.4368	0.4428
		7.56	9.24				0.774	1.134
		5.928	6.18				3.036	0.4986
		6	6				1.38	1.248
		6.84	5.52				0.792	1.038
		9.96	6.84				7.8	0.2952
		7.56	7.2				2.178	0.2484
		3.924	7.2				0.936	0.69
		5.478	3.858				0.858	0.558
		5.664	5.88				3.546	0.834
		8.34	5.148				1.896	0.4764
		6.24	4.35				5.226	1.314
		4.56	5.526				0.6	2.508
		5.088	4.938				3.45	1.788
		5.724	10.86				1.002	0.534
		6.9	10.68				1.884	3.582
			5.01					0.2526
		3.132	7.86				0.288	0.3708
		4.404	4.008				0.24	0.954
		5.682	10.2				0.1032	0.4008
		5.784	6.72				0.1746	0.2712
		4.818	7.86				0.3966	0.4872
		6.84	5.784				0.3492	0.66
		5.424	11.46				0.282	0.774
		4.812	10.14				1.032	1.71
		5.358	6.66				0.906	1.194
		6.3	8.88				1.176	0.3588
		3.108	3.456				0.3168	0.5364
		5.562	9.12				0.4986	1.83
		5.982	4.554				0.4512	1.002
		1.902	10.02				0.5382	0.4554
		3.834	4.686				1.782	1.938
		8.28	5.274				1.212	0.4212
		2.124	6.06				1.014	0.2046
		6.96	9.6				5.454	0.2886
		6.42	6.36				0.786	3.282
		4.932	14.4				1.098	0.5274
		6.24	3.066				3.024	0.3006
		5.49	5.784				0.4758	3.162
		3.582	2.91				0.3378	0.2214
		4.068	11.64				0.66	2.538
		8.7	5.256				3.966	0.5364
		5.316	5.292				0.4878	1.254
		3.354	3.09				0.1926	0.888
		4.386	11.88				0.0714	1.794
		4.5	7.74				2.598	0.5898
		3.822	5.718				0.3882	0.2532
		6.96	10.02				2.58	0.888
		5.046	7.68				0.672	0.2778
		3.72	9.24				0.5472	1.206
		15.9	5.208				2.202	2.346
		4.308	6.9				0.501	0.3162
		4.11	9.6				0.471	0.2814
		3.93	3.99				0.678	1.194
		4.884	6.42				0.864	0.4386
		4.386	5.166				0.708	0.1638
		3.168	6.42				0.2244	0.642
		4.764					0.405	0.3048
		6.72	4.656				1.206	0.42
		5.28	5.334				0.0954	0.483
		6	3.48				2.268	3.552
		9.24	6.42				3.15	1.716
		5.814	5.964				0.4674	2.208
		6.9	8.04				3.348	2.028
		6	6.18				0.4974	0.792
		4.686	8.34				1.968	1.284
		4.224	5.43				0.4746	1.638
		6	7.62				1.02	1.914
		4.152	6.42				0.606	0.87
		6.96	6.48				0.408	0.4326
		5.094	6.48				1.104	0.5994
		9.06	7.98				2.118	0.2052
		5.424	7.56				1.518	0.2622
		3.516	8.1				0.642	1.602
		7.74	6.18				1.296	0.78
		5.028	7.56				0.81	0.5172
		4.728	6.42				0.894	1.458
		9.18	4.002				3.492	0.3828
		3.282	5.226				0.5436	0.5034
		6.9	6.06				0.3918	1.638
		3.024	2.892				0.894	0.654
		4.56	6.18				0.3438	1.698
		2.886	5.328				1.092	0.3084
		8.94	8.04				6.54	0.3912
		5.022	9.36				2.73	1.506
		3.276	6.66				0.738	0.738
		5.238	6.54				0.828	1.632
		3.81	4.764				0.648	1.566
		4.182	5.724				0.732	1.008
		5.646	6.42				0.72	1.434
		6.18	4.5				1.278	0.642
		6.06	6.24				1.11	0.5382
		7.08	6.66				0.4824	0.618
		4.026	8.22				0.78	3.762
		3.372	6.36				0.822	0.3942
		6.12	7.62				0.5886	0.798
		7.32	3.258				2.334	0.3186
		5.766	6.12				1.53	2.802
		7.56	7.26				0.708	0.5316
		5.166	8.04				0.834	3.024
		4.038	4.962				0.4998	0.5244
		6.18	7.08				1.59	1.296
		6.54	6.24				0.2742	1.206
		7.02	5.322				5.586	2.202
		3.744	11.7				0.4182	0.3204
		4.284	5.784				0.5658	0.5316
		3.894	6.54				0.678	0.3498
		5.526	5.892				0.768	0.996
		4.128	5.682				0.5952	1.248
		3.066	8.82				1.098	0.87
		3.54	6.96				0.75	0.4914
		4.464	6.9				0.66	0.402
		8.04	10.08				0.984	1.146
		4.704	4.062				0.924	0.714
		4.506	9.78				0.828	1.956
		8.94	7.5				6.42	1.11
		6.3	5.556				0.912	1.8
		9.9	3.294				1.602	1.482
		7.44	10.98				1.806	0.612
			6.42					0.5244
		3.738	6.36				0.3582	1.002
		4.476	5.256				0.3156	1.578
		3.864	5.166				0.2916	1.482
		5.946	5.712				1.116	1.11
		6.66	6.6				0.666
		5.838	7.62				0.876	0.2472
		5.742	5.658				0.672	0.294
		9.6	8.46				1.068	0.3288
		7.02	6.12				1.548	0.2298
		9.54	5.502				0.876	0.864
		4.86	7.62				1.566	3.51
		6.24	8.04				0.744	1.788
		7.68	7.74				0.522	2.55
		12.24	4.05				2.334	0.4716
		4.392	7.74				0.363	1.824
		5.82	5.79				1.044	4.878
		5.724	8.34				0.5832	0.5268
		5.922	6.6				0.357	1.194
		10.32	11.16				1.302	0.792
		3.378	7.68				0.1818	0.3012
		2.646	5.73				0.2688	0.3804
		9.36	6.42				4.782	0.2364
		3.858	3.954				0.4944	0.4356
		6.96	5.076				2.034	0.5106
		6.9	6.72				1.434	1.092
		2.73	14.4				0.99	0.4104
		7.26	6.12				1.194	2.238
		5.508	9.78				0.2382	0.5934
		6.24	3.81				0.3036	3.564
		8.34	3.822				1.194	1.17
		5.382	9.18				0.5376	1.044
		6.12	8.1				0.3606	4.35
		4.686	10.14				2.094	1.23
		9.3	6.54				1.848	1.77
		6.12	8.4				0.678	0.774
		5.016	4.35				0.1884	0.3642
		5.964	10.5				0.1692	0.606
		9.18					1.77	0.5124
		6.12					0.822	1.836
		5.13					1.068	1.464
		13.14					0.906	1.608
		5.526					0.1758	1.68
		10.26					0.726	1.284
		3.948					0.1236	0.702
		11.4					2.832	0.5064
		7.08					1.026	0.672
		5.25					0.5388	1.626
		7.8					0.5544	0.642
		8.34					1.806	0.918
		7.5					0.66	3.126
		11.22					2.046	0.5286
		7.38					0.3246	0.459
		12.9					1.29	1.236
		4.062					0.3822	0.561
		12.6					1.59	1.026
		6.9					0.2736	0.3942
		3.69					0.3048	1.266
		8.34					0.948	0.543
		8.7					0.78	1.494
		4.422					0.4158	2.67
		10.26					1.098	1.74
		5.874					1.932	2.946
		7.68					0.72	0.1986
		4.422					0.2274	1.44
		5.802					0.4704	0.2904
		5.802					1.248	3.114
		11.82					3.282	0.936
		5.01					2.1	0.66
		5.478					0.2634	1.464
		5.928					0.1578	0.5568
		4.134					0.798	1.182
		14.1					2.19	1.722
		12.12					2.34	1.374
		5.976					2.22	0.5964
		5.616					0.5466	0.2706
		11.34					0.591	0.0864
		7.74					0.3978	1.422
		4.326					0.432	2.094
		9.6					1.476	2.784
		8.76					1.062	1.482
		8.76					3.57	1.008
		12.54					1.014	1.098
		9.3					0.2262	0.5526
		8.1					1.53	2.136
		6.96					3.858	2.712
		8.52					6.06	3.834
		7.56					0.426	0.3054
		9.18					0.954	0.321
		5.442					0.93	1.05
		7.44					0.4578	0.654
		5.412					0.4512	0.4404
		8.34					3.816	1.878
		4.374					0.156	6.42
		4.266					0.177	1.98
		4.818					0.4998	0.942
		7.62					0.321	0.654
		5.658					1.566	0.5946
		6.66					1.698	0.2262
		8.1					0.528	1.194
		8.58					0.5634	0.6
		4.086					0.4782	0.6
		4.158					0.01392	3.384
		8.1					0.3894	0.2652
		10.56					6.24	1.02
		4.428					0.387
		11.7					2.562
		9.18					2.328
		6.12					1.116
		8.28					1.224
		6.3					1.5
		10.44					1.53
		8.16					1.116
		5.826					0.2988
		6.18					0.1836
		10.08					2.316
		12.66					2.55
		4.26					1.176
		6.9					0.522
		8.28					0.2988
		6.12					0.4284
		5.604					0.4872
		9.36					1.188
		6.42					0.4668
		6.9					0.69
		7.2					0.828
		3.504					0.2718
		4.83					0.2478
		4.53					1.278
		3.348					0.918
		4.59					0.78
		4.68					0.2016
		9.84					1.284
		7.8					1.182
		5.748					0.33
		6.84					0.3624
		9.18					3.564
		6.54					0.636
		7.2					1.134
		6.72					0.3288
		13.26					2.898
		5.358					0.2226
		10.98					0.3312
		8.88					0.2832
		9.9					0.786
		5.286					0.456
		4.572					0.2778
		9					1.17
		5.934					0.75
		8.88					4.68
		6.84					0.4056
		9.36					1.908
		6.06					1.584
		3.834					0.2454
		5.16					0.5412
		6.42					1.14
		7.38					2.622
		9.9					0.75
		7.32					0.78
		7.56					0.756
		6.54					1.134
		5.772					1.008
		7.38					1.404
		2.7					0.1842
		7.38					0.882
		7.98					2.286
		5.274					0.672
		4.686					0.3912
		6.48					0.75
		5.556					1.398
		12.36					2.574
		6.42					0.3222
		11.16					1.434
		10.08					1.26
		9.18					7.26
		10.98					1.5
		11.1					1.134
		8.7					0.786
		5.712					1.074
		14.16					1.638
		6.78					0.84
		11.46					0.02886
		4.5					0.4824
		6.48					1.824
		3.834					0.72
		7.98					0.618
		10.08					4.968
		6.06					3.666
		11.04					1.728
		5.97					1.56
		7.26					0.5166
		6.84					1.524
		5.364					0.4086
		8.88					2.112
		9.48					3.276
		6.3					2.43
		11.94					3.426
		7.98					0.435
		8.4					0.768
		12.24					5.142
		4.362					1.014
		3.936					0.72
		10.26					1.818
		6.96					0.2994
		10.98					0.738
		7.08					1.77
		6.24					0.918
		6.42					0.5094
		8.28					0.2094
		7.44					0.972
		5.406					0.918
		3.828					0.75
		3.666					0.2538
		10.98					1.962
		5.97					2.742
		4.314					1.428
		9.84					5.508
		5.808					2.826
		14.52					2.088
		6.12					3.126
		12					3.264
		2.838					0.3222
		4.104					0.5676
		4.788					0.2844
		3.996					0.5352
		4.77					0.2682
		2.916					0.1812
		4.656					0.5136
		4.02					0.918
		7.5					2.79
		2.772					0.4194
		7.68					1.32
		4.614					1.29
		7.32					1.476
		5.628					0.972
		9.3					3.408
		7.44					2.538
		5.436					1.704
		3.996					1.566
		6.96					1.314
		7.26					1.242
		6.48					3.114
		7.5					5.424
		7.86					4.446
		6.06					1.248
		10.2					3.69
		6.66					1.908
		6.06					0.525
		2.652					0.5376
		3.96					0.3132
		6					1.056
		3.054					0.3324
		8.58					2.304
		5.604					0.5136
		2.946					0.3462
		5.976					3.468
		5.532					1.284
		6.06					3.714
		6.78					2.088
		4.074					0.3744
		5.61					2.046
		6.78					1.77
		4.32					2.01
		7.56					1.728
		5.298					1.824
		3.78					0.2652
		7.8					4.08
		9.54					2.25
		5.022					2.532
		6.3					2.55
		4.494					0.63
		5.61					0.636
		5.754					3.738
		7.38					5.43
		4.716					2.484
		6.78					3.522
		3.54					0.5208
		4.26					0.864
		9.42					0.5592
		3.93					0.4374
		9.06					3.414
		7.44					1.17
		4.668					0.5964
		6.24					2.868
		9.12					1.386
		7.26					1.878
		6.78					2.04
		3.522					0.423
		6.96					4.482
		5.832					0.3072
		4.668					1.368
		5.538					0.63
		5.214					0.66
		6.72					0.78
		4.506					0.852
		6.42					0.606
		7.2					3.414
		5.19					0.318
		3.3					0.4194
		4.002					0.5412
		8.4					0.798
		7.8					0.5568
		4.704					1.41
		4.398					0.4746
		5.688					0.792
		5.73					0.4764
		7.26					2.268
		5.622					0.3054
		7.8					4.824
		6.06					1.98
		9.12					2.19
		4.572					1.854
		4.878					1.476
		3.846					1.278
		2.766					0.2382
		6.36					0.738
		3.786					0.678
		4.974					2.238
		8.64					0.624
		6.06					0.744
		9.42					5.166
		5.982					1.338
		5.94					1.14
		4.626					1.056
		6.42					1.176
		5.394					3.684
		5.418					3.594
		5.166					0.5814
		3.858					1.014
		5.202					0.2322
		7.14					1.962
		6.36					3.168
		6.72					0.672
		5.448					0.792
		6.72					0.648
		4.692					1.212
		5.43					1.992
		6.06					2.214
		7.14					4.512
		3.558					0.5808
		9.12					3.738
		8.82					2.316
		6.84					0.834
		6.42					1.746
		7.44					2.838
		9.66					0.918
		5.91					3.57
		4.428					2.064
		4.332					0.804
		4.386					1.11
		6.36					1.212
		6.72					2.304
		9					0.792
		8.58					2.394
		4.824					0.78
		7.5					2.976
		5.19					0.72
		7.02					1.308
		7.56					2.412
		5.826					3.276
		4.464					1.218
		6.3					1.974
		3.414					0.804
		3.744					2.118
		4.974					1.23
		5.946					0.624
		5.22					1.254
		2.502					0.642
		6.24					2.394
		4.518					2.304
		4.17					0.3774
		9.6					3.042
		5.538					0.708
		9					0.918
		6.96					4.29
		7.56					2.25
		8.94					3.288
		6.42					1.686
		7.98					4.908
		9.06					1.938
		3.36					1.926
		4.974					3.84
		3.702					1.122
		6.78					1.308
		5.184					2.646
		4.464					1.176
		9.78					1.446

## Sheet: 5C
Track Volocity pDCs (average/mouse) (μm/min)					Displacement Rate pDCs (average/mouse) (μm/min)
PTCRA-EGFP Naive	PTCRA-EGFP PyYM	StingGt/Gt PTCRA-EGFP Naive	StingGt/Gt PTCRA-EGFP PyYM		PTCRA-EGFP Naive	PTCRA-EGFP PyYM	StingGt/Gt PTCRA-EGFP Naive	StingGt/Gt PTCRA-EGFP PyYM
7.09	1.969	5.961	5.263		1.77	0.3147	1.69	0.679
6.677	5.844	7.314	6.556		1.499	0.8948	1.246	1.142
7.712	4.942	6.127	5.906		1.474	0.7749	1.439	0.8597
	5.574	6.978	6.279			1.625	1.774	1.084
	4.14		6.727			0.5841		1.288
	5.527					0.7927
	6.485					1.152

## Sheet: 5D
(top panel)																			(bottom panel)
PTCRA-EGFP Naive				PTCRA-EGFP PyYM				StingGt/Gt PTCRA-EGFP Naive				StingGt/Gt PTCRA-EGFP PyYM							Slop of MSD (per mouse)
Time (seconds)	Mean	SD	N	Time (seconds)	Mean	SD	N	Time (seconds)	Mean	SD	N	Time (seconds)	Mean	SD	N				PTCRA-EGFP Naive	PTCRA-EGFP PyYM	StingGt/Gt PTCRA-EGFP Naive	StingGt/Gt PTCRA-EGFP PyYM
0	0	0	2637	0	0	0	2309	0	0	0	6221	0	0	0	5600				0.3579	0.2073	0.4174	0.2137
20	16.668	16.4837	2637	20	7.78629	10.0516	1029	20	10.0113	12.6692	6221	20	10.3604	13.0569	5600				0.3542	0.0542	0.3459	0.1548
40	22.9388	29.8121	1563	40	19.6248	18.5481	1828	40	14.1172	19.5962	4204	40	13.7752	20.1933	3703				0.4203	0.1114	0.331	0.08275
60	28.0399	37.8154	1118	60	13.787	18.6615	476	60	18.7929	25.1281	3241	60	16.5607	25.5452	2803					0.18	0.4027	0.2041
80	31.6234	41.6986	873	80	27.4863	33.1537	1068	80	25.0626	35.5147	2639	80	19.2689	30.4122	2265					0.103		0.09614
120	42.7726	64.1016	610	120	20.2282	27.7316	302	100	31.5711	45.6965	2221	100	22.4117	37.7673	1889					0.05349
160	63.0459	106.731	536	160	34.7806	49.5111	301	120	38.6886	56.3289	1925	120	24.3986	41.443	1621
180	73.5535	112.257	507	180	29.8394	42.8256	342	140	49.6943	73.7439	2906	140	27.527	46.962	2166
200	77.913	126.587	333	200	28.5572	43.8029	185	160	56.9338	93.8976	1762	160	30.92	57.0189	1165
240	95.926	162.876	286	240	37.5142	50.8135	331	180	69.0978	112.564	1275	180	33.2718	64.6096	1065
260	102.172	176.203	262	260	35.1875	57.1726	137	200	76.7434	128.71	1161	200	36.886	72.1501	962
280	108.257	186.773	247	280	37.8348	58.0493	241	220	85.7838	143.7	1057	220	43.4128	89.5225	966
300	113.576	206.943	226	300	36.4924	54.0638	117	240	93.1848	159.261	963	240	45.7355	95.5025	811
320	120.469	223.397	214	320	42.027	63.7847	240	260	99.1483	173.167	874	260	52.4269	114.64	841
								280	104.708	185.771	815	280	49.3162	105.103	823
								300	111.486	201.483	756	300	56.4933	123.566	645
								320	118.13	213.779	706	320	57.8952	121.364	604

## Sheet: 5E
Displacement Rate (μm/min)
WT pTCRAGFP -> WT			WT pTCRAGFP -> StingGt/Gt
Naïve	Infected		Naïve	Infected
4.65601	0.021652		0.031859	0.083129
2.10185	0.442222		0.099851	0.086089
3.18476	0.20404		0.912575	0.161488
0.164859	0.056274		0.152406	0.154227
3.20398	0.142471		1.22209	0.148278
0.161948	0.383384		0.740949	0.203167
0.776515	3.36042		0.975101	0.284006
0.510946	0.150138		0.542881	0.204106
4.19104	1.12054		0.387613	0.122842
3.50386	1.70755		0.117161	0.168284
3.08475	0.225792		4.06627	0.210513
0.537585	0.225468		0.284042	0.682292
1.59402	0.297006		0.536256	0.198832
1.18305	0.673779		0.411015	0.491738
1.09519	1.13081		1.45428	0.172172
0.106262	0.448151		0.695231	0.135861
0.649685	0.367822		0.377475	0.688413
2.66836	0.656284		1.61721	0.205978
1.13513	0.220547			0.356111
0.571463	0.062257			0.139245
0.099235	0.42804			0.256297
5.95789	0.323487			0.616312
0.759118	0.829789			0.06346
0.130823	1.1766			0.195684
0.404428	0.984374			0.604621
0.223837	0.082872			0.094974
2.10884	0.41238			0.612713
2.19914	1.56001			0.091666
0.098923	0.817597			0.133883
1.46187	0.123467			0.22703
0.583297	0.114821			0.200642
2.04831	0.6879			0.279067
0.592003	1.56697			0.846051
0.09636	0.720621			0.198998
1.48568	0.166104			0.271075
0.459355	0.433743			0.176187
0.188044	0.115995			0.346645
0.729292	0.147655			0.411086
1.28791	0.305804			1.1666
1.10571	1.05719			0.431734
4.49124	0.287641			0.013931
0.494915	0.35285			0.688865
5.48335	0.855899			0.186112
1.24283	1.29573			0.3958
3.56067	0.608012			0.202103
4.55773	1.39312			0.157655
3.44957	1.14074			0.182903
0.450117	0.25787			0.12451
1.71964	0.567505			0.217763
1.01209	0.155789			0.263068
2.04195	0.059321			1.58857
	0.201052			0.591282
	0.675804			0.908807
	0.03784			0.813794
	0.143671			0.552629
	0.758971			0.190499
	0.114207			0.206614
	0.096588			0.081856
	0.875449			0.256695
	0.229816			0.06636
	0.211202			0.318171
	0.475738			1.09758
	0.4997			0.638613
	0.55936			0.833711
				0.264955
				0.18145
				0.265402
				0.146869
				0.097168
				0.449339
				0.161089
				0.646639
				0.166523
				0.099185
				0.084815
				0.188415
				0.413278
				0.324709
				0.091784
				0.066537
				0.261039
				0.066048
				0.111099
				0.172762
				0.331039
				0.530263
				0.414029
				0.145134
				0.234189

## Sheet: 5F
Individual pDC in contact with CD169+ MPs
WT pTCRAGFP -> WT		WT pTCRAGFP -> StingGt/Gt
Naïve	Infected	Naïve	Infected
0.628367	54.7578	0.314183	0.3147
0.628367	54.7578	0.314183	0.3147
0.628367	42.4845	0.314183	12.9027
0.314183	45.3168	1.57092	0.3147
0.314183	45.6315	0.314183	0.3147
0.314183	26.1201	1.57092	0.3147
0.314183	9.1263	1.25673	0.3147
0.314183	50.0373	0.628367	0.3147
0.628367	21.0849	6.91203	0.3147
0.628367	35.5611	1.25673	1.2588
0.314183	51.2961	2.19928	0.3147
0.314183	9.441	3.45602	0.3147
0.314183	23.2878	12.8815	0.3147
4.71275	31.7847	0.628367	0.3147
0.314183	54.1284	0.314183	0.3147
0.628367	9.441	4.71275	5.3499
0.314183	32.7288	1.57092	0.3147
0.314183	7.8675	5.6553	0.3147
0.628367	21.7143	0.314183	0.6294
0.314183	10.3851	0.314183	0.3147
0.314183	7.2381	18.2226	0.3147
4.39857	35.8758	0.314183	0.3147
22.307	9.7557	0.314183	0.6294
1.8851	5.3499	0.314183	0.3147
0.94255	6.6087	0.94255	0.3147
0.314183	6.9234	1.25673	0.9441
0.314183	19.1967	0.628367	0.3147
0.314183	17.3085	8.48295	0.3147
0.628367	10.6998	1.25673	0.3147
0.314183	0.3147	0.94255	0.31315
0.628367	0.9441	0.314183	0.31315
1.25673	4.7205	2.82765	0.31315
0.314183	6.294	8.79713	0.31315
4.71275	14.1615	5.96948	0.6263
42.5445	4.7205	26.7056	0.31315
5.43802	1.2588	5.02693	0.31315
31.9883	11.9586		0.31315
11.1959	11.3292		0.31315
8.31697	16.9938		0.6263
13.4351	5.3499		2.81835
8.63685	7.2381		0.31315
4.79825	11.0145		1.56575
4.47837	13.2174		2.81835
	10.0704		0.31315
	1.2588		0.93945
	2.5176		0.6263
	0.3147		0.31315
	1.5735		0.6263
	0.9441		0.31315
	0.3147		2.5052
	1.2588		0.93945
	5.3499		0.31315
	1.5735		0.6263
	2.8323		0.31315
	11.9586		0.31315
	19.1967		0.31315
	15.735		0.93945
	19.5114		10.6471
	30.2112		2.5052
	8.4969		4.07095
	14.1615		5.0104
	5.3499		10.0208
	17.3085		1.56575
	5.6646		4.3841
	0.9441		1.56575
	0.9441		6.263
	1.2588		6.57615
	0.3147		1.8789
	0.3147		13.4654
	4.4058		0.93945
	0.6294		0.31315
	16.9938		0.93945
	12.9027		2.19205
	18.882		0.31315
	17.6232		53.5486
	12.2733		0.93945
	1.2588		0.93945
	3.4617		1.8789
	0.3147		0.6263
	1.2588		0.6263
	2.5176		0.93945
	5.3499		0.31315
	14.1615		0.31315
	12.9027		1.8789
	12.2733		0.31315
	6.294		0.31315
	9.7557		1.8789
	9.1263		0.31315
	5.6646		1.2526
	10.9602		0.6263
	7.82875		0.31315
	0.31315		0.31315
	1.8789		0.31315
	4.69725		0.6263
	2.81835		0.31315
	1.2526		0.6263
	1.56575		1.2526
	0.31315		0.31315
	20.981		0.31315
	22.5468		0.31315
	0.6263		0.31315
	0.93945		0.6263
	0.31315		0.6263
	0.6263		0.31315
	2.5052		0.31315
	0.6263		18.789
	0.6263		0.31315
	0.31315		0.31315
	0.31315		0.6263
	1.56575		1.56575
	0.6263		1.8789
	0.93945		0.93945
	0.6263		1.56575
	0.6263		5.94985
	5.6367		0.31315
	67.3272		0.6263
	67.3272		0.31315
	0.6263		0.93945
	1.56575		0.93945
	0.31315		0.31315
	5.0104		0.31315
	0.31315		0.6263
	0.31315		0.93945
	0.31315		5.32355
	0.31315		1.2526
	0.31315		0.6263
	0.31315		12.526
	0.31315		0.6263
	0.31315		0.31315
	0.31315		0.93945
	0.31315		2.19205
	0.31315		0.31315
	0.31315		0.93945
	0.31315		0.6263
	0.31315		2.5052
	5.6367		36.9517
	3.44465		5.6367
	0.31315		3.1315
	0.31315		0.6263
	0.31315		0.93945
	0.31315		11.5865
	0.31315		0.31315
	0.31315		0.31315
	5.6367		0.31315
	5.94985		0.31315
	0.6263		0.31315
	0.93945
	5.32355
	5.94985
	0.6263
	0.31315
	0.6263
	0.93945
	0.31315
	0.31315
	0.31315
	0.6263
	0.31315
	0.31315
	0.31315
	1.2526
	0.93945
	0.31315
	0.6263
	0.31315
	0.31315
	0.31315
	0.31315
	0.31315
	0.31315
	0.31315
	0.6263
	0.31315
	0.31315
	0.31315
	0.6263
	0.31315
	0.31315
	0.6263
	0.31315
	0.31315
	0.31315
	0.93945
	0.31315
	0.31315
	0.31315
	0.31315
	0.31315
	0.6263
	0.31315
	1.56575
	1.2526
	0.31315
	0.31315
	0.93945
	0.31315
	0.31315
	0.31315
	0.6263
	1.8789
	2.19205
	0.6263
	3.7578
	0.6263

## Sheet: 5H
Volume of pDC clusters (Log 10𝜇m)
All Infected, Py YM
WT	StingGt/Gt	WT pTCRAGFP -> WT	WT pTCRAGFP -> StingGt/Gt
11670.7	32301.3	14217.9	38690
37445.9	27977.5	17457	25718.4
27394.7	28398.7	24127.2	23372
35924.6	29736.7	24190.5	14667.5
30216.9	49380.7	29496.6	13759.5
19358.1	60726.2	27979.6	31009.2
31144.5	73889.9	20916.5	58307.8
7713.65	112239	11127.2	16313.3
13650.8	67313.5	11775.5	11755.9
15625.7	105807	12039.6	13364.5
16880	1.11172e+06	17708	13569.6
13818.1	29121.2	11699.1	25917
16045.7	37452.4	17588	18085.6
11920	49690.6	23105.7	47012.5
6862.39	310319	31406.4	18635.6
21244.7	329893	37107.6	41317.9
30289.5	32871	14263.7	34737.2
33456.9	17138.3	26639.5	47501.4
18350.6	47726.2	24437.2	40423
21731.2	21272.3	23575	29898.2
32835.7	43382.7	11937	28970.6
28430.9	72194	20082.7	39323
48134.3	69502.7	11937	127112
34014.5	53973	30472.2	92427.3
41028.7	87553.4		104927
25423.8	163279		83705.4
16551.5	15022.3		166734
25808.9	17787.8		119355
36922.8	12521.2		265170
10626.7	59075.4		292098
16259.9	52010.2		26785.7
37422.2	32415.2		19113.6
21356.7	78017.2		14608.6
12398.2	144248		17238.7
46331.5	213351		13408.1
32822.4	263392		50899.8
41622.2	581614		13307.7
29606.6	26265.3		26325.2
11168	11170.5		24236.4
39239.3	30461.6		41018.9
13512.8	16205.8		22387.6
26654.1	26636.8		23585.9
53353.6	9910.7		58454.1
5528.7	15729.7		90297
14065.1	11799.1
33285.7	21001.2
40082.5	27531.2
18618.2	24186.2
14831.2	9881.17
11670.7	20215.1
37445.9	12763.6
13794.5	11043.7
39604.5	29776.4
68302.3	46928.2
	22066.5
	31860.4
	32890.1
	36001.3
	66550.3
	56869.6
	18383.3
	39720.3
	50075.1
	54492.8
	21076.2
	22844
	63378.8
	55673.8
	41940.8
	34269.2
	49072.5
	79808.4
	68111.4
	67646.4
	174687
	251555
	258782

## Sheet: 5I
Ifnb YFP/YFP mice
(top panel)						(bottom panel)
Number of pDC per leg						% of YFP+ pDC among pDC
WT		StingGt/Gt				WT		StingGt/Gt
Naïve	Infected	Naïve	Infected			Naïve	Infected	Naïve	Infected
615164	342676	626550	580204			0.023	1.42	0.03	0.36
509576	379966	696274	631237			0.012	1.15	0.056	0.54
380137	386897	649634	642810			0.09	1.35	0.11	0.52
483708	279384	490155	513409			0.039	1.57	0.079	0.38
	308186		476408				1.99		0.89
	149006		304909				2.45		0.3
