# Supplementary material for: CD169+ macrophages orchestrate plasmacytoid dendritic cell arrest and retention for optimal priming in the bone marrow of malaria-infected mice
Source: eLife. 2022 Oct 24;11:e78873. doi: 10.7554/eLife.78873 (PMC9648966; doi:10.7554/eLife.78873)
Supplement: Figure 6—source data 1. [file elife-78873-fig6-data1.xlsx]

## Sheet: 6A
		% ICAM-1+ YFP+ pDC				Number of YFP+ pDC per leg
	WT	StingGt/WT	Cd169CreStingGt/F		WT	StingGt/WT	Cd169CreStingGt/F
	1.79	1.01	0.89		2452.32	2941.18	1310.04
	2.83	2.45	0.52		4867.99	6308.85	1816.44
	2.82	2.13	0.48		2644.63	3010.47	835.422
	3.12	3.43	1.45		3574.23	2551.93	761.421
	2.44	1.48	0.81		7102.67	4726.65	2444.7
	2.75	1.34	2		2211.13	2466.79	1033.73
	2.3	1.69	0.69		7182.32	3590.28	6580.57
	4.07		0.17		7532.17		1555.02
	1.74		2.72		4942.34		675.676
	1.23		0.95		4002.67		6483.4
	1.37		0.55		4423.87		3971.71
	2.01		1.03		5562.74		1216.02
			1.16				3545.45
							2787.46

## Sheet: 6B
				Number of pDC per leg
		Naïve WT	WT	StingGt/WT	StingGt/Gt	Cd169CreStingGt/F	DT, Cd169Dtr
		615164	137375	290131	580204	146543	233845
		509576	172071	261111	631237	348136	355296
		380137	93739.7	153927	642810	175188	406544
		483708	114493	76053.4	513409	355548
		493221	297187	319049	476408	188184
		422355	77817.4	184345	304909	141349
		454088	332735	212460	153422	360025
		367544	193490		184310	232596
			276277		210845	789048
			324616			394902
			323200			238226
			277296			444614
						222711
						343182
						239896

## Sheet: 6C
^
				Number of CD169hi MPs							% CD169hi MPs in linneg CD45.1+ cells									Number of F4/80hi MPs per leg								% F4/80hi MPs in linneg CD45.1+ cells
		Naïve WT	WT	StingGt/Gt	Inffected StingGt/Gt	StingGt/WT	Cd169CreStingGt/F		Naïve WT	WT	StingGt/Gt	Inffected StingGt/Gt	StingGt/WT	Cd169CreStingGt/F			Naïve WT	WT	StingGt/Gt	Inffected StingGt/Gt	StingGt/WT	Cd169CreStingGt/F			Naïve WT	WT	StingGt/Gt	Inffected StingGt/Gt	StingGt/WT	Cd169CreStingGt/F
		3540370	984082	2968280	3033654	1840534	402620		3.9	2.15	7.81	4.51	6.3	2.04			1199630	143258	1672670	567949	211454	213732			1.54	0.2	3.33	1.01	0.72	1.08
		2820438	838283	2712757	1325082	1436244	251280		4.19	1.65	7.01	4.16	4.86	1.7			1135766	219074	1160494	322780	333494	129802			1.84	0.16	2.71	0.84	1.13	0.88
		1946006	1086787	3146218	2120149	574929	606754		7.72	0.98	5.92	5.53	3.09	2.02			767252	181532	1.34223e+06	356219	182788	244556			2.62	0.072	3.34	0.95	0.98	0.81
		1236790	929084	2178784	1312785	214564	1122710		6.97	3.3	8.41	8.76	1.27	3.22			544460	88247	843578	293607	103153	397742			2.81	0.48	3.6	1.64	0.61	1.14
		2671560	514935		1097652	1168861	352844		5.69	2.94		4.38	3.97	2.21			541917	50216.5		222273	52554	265195			3.04	0.77		1.07	0.18	0.74
		2307416	191667		1193006	1895711	792718		6.17	3.08		4.92	5.59	1.29			544832	14166.7		204836	223851	78436			1.45	0.52		0.83	0.35	0.29
		1789943	866306			1704682	789048		5	3.74			3.77	2.06			508091	164547			280544	150971			1.73	3.04			0.56	0.39
		1579888	317202			2127517	750729		5.16	1.88			2.89	0.73			526438	111456			235393	158163			2.18	1.45			0.4	0.43
		1313693	745833			1753944	160942		7.21	2.45			6.47	0.72			757648	50531.9			49530.2	16134.2				1.73				0.074
		3697108	359746			1454717	201937		6.89	1.8			3.75	0.8				29449.2			59859.2	26150.1				2.18				0.094
		2680154	833174				339628			3.95			4.57	2.05				63555.9			35849.1	46808.5				0.17				0.11
			966075				749335			3.46				2.99				100000				57259.7				0.15
			1389338				1998950			3.01				5.57				197978				74159.7				0.3
			1413131				1611260			3.6				4.16				182071				144847				0.36
			1139665							3.28								84264.4								0.43
			802294							2.44								47626.6								0.79
