# Supplementary material for: CD169+ macrophages orchestrate plasmacytoid dendritic cell arrest and retention for optimal priming in the bone marrow of malaria-infected mice
Source: eLife journal article supplement (doi:10.7554/elife.78873), 2022-10-24
Supplement: supp1 [file elife-78873-supp1-v2.pdf]

| Reagent/Antibody               | Fluorochrome                         | Clone                 | Purchased from                  |
|--------------------------------|--------------------------------------|-----------------------|---------------------------------|
| <b>FACS</b>                    |                                      |                       |                                 |
| anti-BST2                      | APC, PE                              | eBio129c              | eBioscience                     |
| anti-CD3                       | PerCpCy5.5, BV510                    | 145-2C11 or 17A2      | Biolegend, BD Biosciences       |
| anti-CD19                      | PerCpCy5.5, BV510                    | 1D3                   | eBioscience, BD Biosciences     |
| anti-CX3CR1                    | PE-Cy7                               | SA011F11              | Biolegend, BD Biosciences       |
| anti-NK1.1                     | PerCpCy5.5, BV510                    | PK136                 | eBioscience, BD Biosciences     |
| anti-Ly-6C                     | PerCpCy5.5, FITC                     | HK1. 4 AL-21          | BD Biosciences                  |
| anti-CD11a                     | Biotin, APC                          | M17/4                 | eBioscience                     |
| anti-CD11b                     | eF450, BB700, FITC                   | M1/70                 | BD Biosciences                  |
| anti-CD169                     | PE, APC, FITC                        | SER4                  | eBioscience                     |
| anti-Ly-6G                     | AF700, PE                            | 1A8                   | BD Biosciences                  |
| anti-F4/80                     | BV421                                | BM8                   | Biolegend, eBioscience          |
| anti-Gr1                       | BV510                                | RB6-8C5               | BD Biosciences                  |
| anti-CD45                      | Alexa 700                            | 30-F11                | BD Biosciences                  |
| anti-CD80                      | PE-Cy7                               | 16-10A1 1615A1        | eBioscience, BD Biosciences     |
| anti-CD86                      | PE, APC                              | GL1                   | eBioscience, BD Biosciences     |
| anti-MHCII I-Ab                | FITC                                 | AF6-120.1 M5/114.15.2 | eBioscience                     |
| anti-ICAM-1                    | Biotin, PE                           | YN1.1.7.4, 3E2        | eBioscience, BD Biosciences     |
| anti-VCAM1                     | PE-Cy7                               | 429                   | eBioscience                     |
| CD62-L                         | AF700                                | MEL-14                | Biolegend                       |
| anti-SiglecH                   | PE-Cy7, AF647                        | eBio440c              | eBioscience                     |
| anti-Sca-1                     | Biotin, Alexa 700                    | D7                    | eBioscience                     |
| anti-CD49d                     | PE                                   | R1-2                  | eBioscience                     |
| anti-CD115                     | PE-Cy7                               | AFS98                 | eBioscience                     |
| anti-CXCR3                     | PerCpCy5.5                           | CXCR3-173             | eBioscience                     |
| anti-CXCR4                     | PerCpCy5.5 eFluor710                 | 2B11                  | eBioscience                     |
| anti-CCR9                      | Pe-Cy7                               | eBiocw-1.2            | eBioscience                     |
| LIVE/DEAD<br>streptavidin      | Ghostred780<br>eFluor710, PerCpCy5.5 |                       | Tonbo<br>eBioscience            |
| anti-Ter119                    | Biotin                               | TER-119               | eBioscience                     |
| <b>Intravital Microscopy</b>   |                                      |                       |                                 |
| anti-CD169                     | PE                                   | SER4                  | eBioscience                     |
| <b>In vivo depletion</b>       |                                      |                       |                                 |
| anti-CXCR3                     |                                      | CD183                 | BioXcell                        |
| anti-LFA-1 $\alpha$ (CD11a)    |                                      | M17/4                 | BioXcell                        |
| anti-VLA-4 (CD49d)             |                                      | PS/2                  | BioXCell                        |
| CXCL9                          |                                      | 2A6.9.9               | Andrew Luster, Robert Schreiber |
| Rat IgG2b, $\kappa$            |                                      |                       | BioXCell                        |
| Rat IgG2a, Rat IgG2b, $\kappa$ |                                      |                       | BioXCell                        |
| Armenian Hamster IgG           |                                      |                       | BioXCell                        |

Table S1
